# Supplementary material
Source: PubMed Central journal article supplement (PMC4155059)
Supplement: NIHMS606338-supplement-3.pdf [file NIHMS606338-supplement-3.pdf]

**Supplementary Table 1: All mutations identified in the index case.** All somatic mutations detected in the whole genome sequence of the index case are shown with their context and affect.

| Symbol    | Contig | Position | Reference Allele | Alternative Allele | Nucleotide | Protein | Variant Classification | Variant Type | Tumor Variant Freq. | Tumor_ref_allele | Tumor_alt_allele |
|-----------|--------|----------|------------------|--------------------|------------|---------|------------------------|--------------|---------------------|------------------|------------------|
| WASH7P    | chr1   | 16957    | G                | T                  | --         | --      | RNA                    | SNP          | 0.267               | 11               | 4                |
| --        | chr1   | 63202    | T                | C                  | --         | --      | IGR                    | SNP          | 0.105               | 34               | 4                |
| --        | chr1   | 128595   | C                | T                  | --         | --      | IGR                    | SNP          | 0.600               | 2                | 3                |
| --        | chr1   | 534052   | G                | A                  | --         | --      | IGR                    | SNP          | 0.280               | 18               | 7                |
| --        | chr1   | 649426   | GTA              | -                  | --         | --      | IGR                    | DEL          | 0.111               | 16               | 2                |
| LOC643837 | chr1   | 789242   | C                | G                  | --         | --      | RNA                    | SNP          | 0.183               | 58               | 13               |
| NOC2L     | chr1   | 881470   | C                | T                  | --         | --      | Intron                 | SNP          | 0.378               | 51               | 31               |
| LOC254099 | chr1   | 1075718  | G                | A                  | --         | --      | RNA                    | SNP          | 0.158               | 32               | 6                |
| TLL10     | chr1   | 1120069  | C                | T                  | --         | --      | Intron                 | SNP          | 0.160               | 63               | 12               |
| SCNN1D    | chr1   | 1220658  | C                | G                  | --         | --      | Intron                 | SNP          | 0.435               | 39               | 30               |
| SCNN1D    | chr1   | 1224256  | T                | C                  | --         | --      | Intron                 | SNP          | 0.118               | 30               | 4                |
| SCNN1D    | chr1   | 1225466  | T                | C                  | --         | --      | Intron                 | SNP          | 0.222               | 28               | 8                |
| SSU72     | chr1   | 1482257  | A                | C                  | --         | --      | Intron                 | SNP          | 0.600               | 2                | 3                |
| KIAA1751  | chr1   | 1883876  | T                | C                  | --         | --      | 3'Flank                | SNP          | 0.290               | 22               | 9                |
| KIAA1751  | chr1   | 1913681  | C                | T                  | --         | --      | Intron                 | SNP          | 0.175               | 33               | 7                |
| --        | chr1   | 2148772  | G                | A                  | --         | --      | IGR                    | SNP          | 0.143               | 18               | 3                |
| SKI       | chr1   | 2166239  | C                | G                  | --         | --      | Intron                 | SNP          | 0.275               | 29               | 11               |
| HES5      | chr1   | 2461711  | C                | T                  | --         | --      | 5'Flank                | SNP          | 0.400               | 12               | 8                |
| --        | chr1   | 2883631  | C                | T                  | --         | --      | IGR                    | SNP          | 0.615               | 20               | 32               |
| MEGF6     | chr1   | 3462938  | C                | T                  | --         | --      | Intron                 | SNP          | 0.216               | 40               | 11               |
| MEGF6     | chr1   | 3500342  | C                | G                  | --         | --      | Intron                 | SNP          | 0.227               | 34               | 10               |
| WRAP73    | chr1   | 3552808  | C                | G                  | --         | --      | Intron                 | SNP          | 0.593               | 24               | 35               |
| TP73      | chr1   | 3610498  | G                | A                  | --         | --      | Intron                 | SNP          | 0.128               | 34               | 5                |
| --        | chr1   | 4108284  | T                | A                  | --         | --      | IGR                    | SNP          | 0.339               | 37               | 19               |
| --        | chr1   | 4392931  | G                | C                  | --         | --      | IGR                    | SNP          | 0.106               | 42               | 5                |
| --        | chr1   | 4442361  | A                | G                  | --         | --      | IGR                    | SNP          | 0.111               | 32               | 4                |
| --        | chr1   | 4527312  | A                | T                  | --         | --      | IGR                    | SNP          | 0.148               | 46               | 8                |
| --        | chr1   | 4544531  | T                | C                  | --         | --      | IGR                    | SNP          | 0.333               | 32               | 16               |
| --        | chr1   | 4545330  | C                | T                  | --         | --      | IGR                    | SNP          | 0.560               | 22               | 28               |
| --        | chr1   | 4692850  | G                | T                  | --         | --      | IGR                    | SNP          | 0.154               | 33               | 6                |
| AJAP1     | chr1   | 4803679  | T                | C                  | --         | --      | Intron                 | SNP          | 0.292               | 34               | 14               |
| --        | chr1   | 4860358  | G                | T                  | --         | --      | IGR                    | SNP          | 0.254               | 44               | 15               |
| --        | chr1   | 4942811  | AT               | -                  | --         | --      | IGR                    | DEL          | 0.271               | 43               | 16               |
| --        | chr1   | 5432723  | G                | C                  | --         | --      | IGR                    | SNP          | 0.217               | 36               | 10               |
| --        | chr1   | 5499876  | T                | C                  | --         | --      | IGR                    | SNP          | 0.521               | 23               | 25               |
| --        | chr1   | 5765776  | A                | T                  | --         | --      | IGR                    | SNP          | 0.328               | 39               | 19               |
| --        | chr1   | 5852181  | G                | A                  | --         | --      | IGR                    | SNP          | 0.224               | 45               | 13               |
| NPHP4     | chr1   | 6009907  | C                | A                  | --         | --      | Intron                 | SNP          | 0.333               | 38               | 19               |
| KCNAB2    | chr1   | 6053489  | G                | T                  | --         | --      | Intron                 | SNP          | 0.582               | 28               | 39               |
| DNAJC11   | chr1   | 6749746  | G                | C                  | --         | --      | Intron                 | SNP          | 0.447               | 26               | 21               |
| --        | chr1   | 6807525  | C                | T                  | --         | --      | IGR                    | SNP          | 0.536               | 13               | 15               |
| CAMTA1    | chr1   | 6909928  | C                | G                  | --         | --      | Intron                 | SNP          | 0.615               | 10               | 16               |
| CAMTA1    | chr1   | 7469636  | C                | G                  | --         | --      | Intron                 | SNP          | 0.571               | 27               | 36               |
| CAMTA1    | chr1   | 7476009  | G                | A                  | --         | --      | Intron                 | SNP          | 0.600               | 2                | 3                |
| CAMTA1    | chr1   | 7758149  | A                | C                  | --         | --      | Intron                 | SNP          | 0.231               | 10               | 3                |
| --        | chr1   | 7954577  | G                | A                  | --         | --      | IGR                    | SNP          | 0.289               | 27               | 11               |
| TNFRSF9   | chr1   | 7975860  | G                | T                  | --         | --      | 3'Flank                | SNP          | 0.351               | 24               | 13               |
| --        | chr1   | 8126264  | A                | G                  | --         | --      | IGR                    | SNP          | 0.309               | 56               | 25               |
| --        | chr1   | 8180423  | C                | G                  | --         | --      | IGR                    | SNP          | 0.589               | 23               | 33               |
| --        | chr1   | 8228576  | C                | T                  | --         | --      | IGR                    | SNP          | 0.286               | 35               | 14               |
| --        | chr1   | 8371105  | G                | A                  | --         | --      | IGR                    | SNP          | 0.211               | 15               | 4                |
| RERE      | chr1   | 8502040  | C                | T                  | --         | --      | Intron                 | SNP          | 0.553               | 17               | 21               |
| RERE      | chr1   | 8560954  | T                | C                  | --         | --      | Intron                 | SNP          | 0.150               | 17               | 3                |
| RERE      | chr1   | 8612525  | C                | A                  | --         | --      | Intron                 | SNP          | 0.209               | 34               | 9                |
| --        | chr1   | 9093188  | C                | A                  | --         | --      | IGR                    | SNP          | 0.667               | 12               | 24               |
| --        | chr1   | 9491336  | C                | A                  | --         | --      | IGR                    | SNP          | 0.148               | 23               | 4                |
| --        | chr1   | 9497297  | G                | C                  | --         | --      | IGR                    | SNP          | 0.192               | 42               | 10               |
| --        | chr1   | 9552306  | A                | T                  | --         | --      | IGR                    | SNP          | 0.176               | 28               | 6                |
| SLC25A33  | chr1   | 9605486  | C                | T                  | --         | --      | Intron                 | SNP          | 0.379               | 18               | 11               |
| PIK3CD    | chr1   | 9759781  | G                | T                  | --         | --      | Intron                 | SNP          | 0.255               | 35               | 12               |
| UBE4B     | chr1   | 10233872 | -                | GT                 | --         | --      | Intron                 | INS          | 0.213               | 59               | 16               |
| CASZ1     | chr1   | 10816899 | G                | A                  | --         | --      | Intron                 | SNP          | 0.725               | 14               | 37               |
| CASZ1     | chr1   | 10852218 | G                | A                  | --         | --      | Intron                 | SNP          | 0.267               | 11               | 4                |
| --        | chr1   | 10892375 | C                | T                  | --         | --      | IGR                    | SNP          | 0.190               | 34               | 8                |
| --        | chr1   | 10945987 | G                | A                  | --         | --      | IGR                    | SNP          | 0.150               | 17               | 3                |
| --        | chr1   | 10982499 | T                | C                  | --         | --      | IGR                    | SNP          | 0.179               | 32               | 7                |
| TARDBP    | chr1   | 11079514 | A                | T                  | --         | --      | Intron                 | SNP          | 0.150               | 51               | 9                |
| MASP2     | chr1   | 11091994 | G                | A                  | --         | --      | Intron                 | SNP          | 0.607               | 22               | 34               |
| MASP2     | chr1   | 11093091 | G                | C                  | --         | --      | Intron                 | SNP          | 0.689               | 14               | 31               |
| MASP2     | chr1   | 11093310 | G                | A                  | --         | --      | Intron                 | SNP          | 0.500               | 13               | 13               |
| MASP2     | chr1   | 11093318 | G                | C                  | --         | --      | Intron                 | SNP          | 0.455               | 12               | 10               |
| MASP2     | chr1   | 11093971 | G                | C                  | --         | --      | Intron                 | SNP          | 0.500               | 10               | 10               |
| MASP2     | chr1   | 11094426 | G                | C                  | --         | --      | Intron                 | SNP          | 0.543               | 16               | 19               |
| MASP2     | chr1   | 11095736 | G                | C                  | --         | --      | Intron                 | SNP          | 0.638               | 17               | 30               |
| --        | chr1   | 11495812 | TG               | -                  | --         | --      | IGR                    | DEL          | 0.297               | 26               | 11               |

|              |      |          |    |    |             |             |                 |     |       |    |    |
|--------------|------|----------|----|----|-------------|-------------|-----------------|-----|-------|----|----|
| --           | chr1 | 11960200 | G  | A  | --          | --          | IGR             | SNP | 0.636 | 8  | 14 |
| MFN2         | chr1 | 12068884 | A  | C  | --          | --          | Intron          | SNP | 0.231 | 20 | 6  |
| --           | chr1 | 12121015 | C  | T  | --          | --          | IGR             | SNP | 0.238 | 16 | 5  |
| VPS13D       | chr1 | 12304418 | C  | T  | C291T       | F97F        | Silent          | SNP | 0.283 | 33 | 13 |
| --           | chr1 | 12844803 | GT | -  | --          | --          | IGR             | DEL | 0.113 | 47 | 6  |
| --           | chr1 | 12844851 | A  | G  | --          | --          | IGR             | SNP | 0.109 | 49 | 6  |
| PRAMEF1      | chr1 | 12855844 | G  | A  | G1124A      | R375Q       | Missense_mutati | SNP | 0.133 | 39 | 6  |
| --           | chr1 | 12894148 | -  | CA | --          | --          | IGR             | INS | 0.132 | 33 | 5  |
| --           | chr1 | 12905269 | G  | T  | --          | --          | IGR             | SNP | 0.186 | 35 | 8  |
| --           | chr1 | 12935869 | G  | C  | --          | --          | IGR             | SNP | 0.211 | 15 | 4  |
| PRAMEF4      | chr1 | 12940980 | A  | T  | --          | --          | Intron          | SNP | 0.118 | 30 | 4  |
| --           | chr1 | 13141445 | G  | A  | --          | --          | IGR             | SNP | 0.235 | 13 | 4  |
| LOC440563    | chr1 | 13184440 | C  | T  | --          | --          | 5'Flank         | SNP | 0.175 | 33 | 7  |
| --           | chr1 | 13414204 | A  | T  | --          | --          | IGR             | SNP | 0.217 | 18 | 5  |
| --           | chr1 | 13414229 | T  | C  | --          | --          | IGR             | SNP | 0.235 | 26 | 8  |
| --           | chr1 | 13414287 | G  | C  | --          | --          | IGR             | SNP | 0.194 | 25 | 6  |
| --           | chr1 | 13414288 | T  | A  | --          | --          | IGR             | SNP | 0.207 | 23 | 6  |
| PRAMEF13,P   | chr1 | 13448108 | G  | A  | C1223T,C136 | P408L,P456L | Missense_mutati | SNP | 0.250 | 12 | 4  |
| --           | chr1 | 13908995 | G  | A  | --          | --          | IGR             | SNP | 0.413 | 27 | 19 |
| --           | chr1 | 14001183 | C  | T  | --          | --          | IGR             | SNP | 0.682 | 7  | 15 |
| --           | chr1 | 14013842 | G  | A  | --          | --          | IGR             | SNP | 0.283 | 33 | 13 |
| --           | chr1 | 14362152 | G  | T  | --          | --          | IGR             | SNP | 0.211 | 15 | 4  |
| --           | chr1 | 14528324 | T  | G  | --          | --          | IGR             | SNP | 0.295 | 43 | 18 |
| --           | chr1 | 14803960 | T  | C  | --          | --          | IGR             | SNP | 0.136 | 38 | 6  |
| SPEN         | chr1 | 16175175 | C  | G  | --          | --          | Intron          | SNP | 0.500 | 14 | 14 |
| CROCCP3      | chr1 | 16808108 | C  | T  | --          | --          | RNA             | SNP | 0.226 | 24 | 7  |
| NBPF1        | chr1 | 16910251 | G  | C  | --          | --          | Intron          | SNP | 0.200 | 16 | 4  |
| --           | chr1 | 17225757 | A  | G  | --          | --          | IGR             | SNP | 0.137 | 44 | 7  |
| --           | chr1 | 17511196 | C  | A  | --          | --          | IGR             | SNP | 0.323 | 21 | 10 |
| --           | chr1 | 17777256 | T  | C  | --          | --          | IGR             | SNP | 0.720 | 7  | 18 |
| --           | chr1 | 18061700 | C  | T  | --          | --          | IGR             | SNP | 0.340 | 33 | 17 |
| --           | chr1 | 18073828 | T  | C  | --          | --          | IGR             | SNP | 0.319 | 32 | 15 |
| --           | chr1 | 18239487 | C  | T  | --          | --          | IGR             | SNP | 0.609 | 25 | 39 |
| IGSF21       | chr1 | 18556465 | C  | T  | --          | --          | Intron          | SNP | 0.623 | 23 | 38 |
| IGSF21       | chr1 | 18557389 | T  | G  | --          | --          | Intron          | SNP | 0.208 | 42 | 11 |
| IGSF21       | chr1 | 18557390 | G  | T  | --          | --          | Intron          | SNP | 0.208 | 42 | 11 |
| IGSF21       | chr1 | 18658856 | C  | G  | --          | --          | Intron          | SNP | 0.517 | 29 | 31 |
| IGSF21       | chr1 | 18685403 | T  | G  | --          | --          | Intron          | SNP | 0.367 | 38 | 22 |
| --           | chr1 | 18883404 | C  | G  | --          | --          | IGR             | SNP | 0.262 | 31 | 11 |
| --           | chr1 | 18883751 | C  | G  | --          | --          | IGR             | SNP | 0.361 | 39 | 22 |
| --           | chr1 | 18931479 | C  | T  | --          | --          | IGR             | SNP | 0.263 | 14 | 5  |
| --           | chr1 | 18939796 | C  | G  | --          | --          | IGR             | SNP | 0.152 | 28 | 5  |
| IFFO2        | chr1 | 19282174 | T  | A  | A653T       | E218V       | Missense_mutati | SNP | 0.310 | 20 | 9  |
| CAPZB        | chr1 | 19716572 | T  | G  | --          | --          | Intron          | SNP | 0.448 | 32 | 26 |
| --           | chr1 | 19886852 | C  | G  | --          | --          | IGR             | SNP | 0.548 | 14 | 17 |
| --           | chr1 | 19886955 | C  | G  | --          | --          | IGR             | SNP | 0.560 | 11 | 14 |
| --           | chr1 | 19887063 | C  | T  | --          | --          | IGR             | SNP | 0.667 | 16 | 32 |
| C1orf151     | chr1 | 19956092 | A  | T  | --          | --          | 3'UTR           | SNP | 0.164 | 56 | 11 |
| C1orf15-NBL1 | chr1 | 19968295 | G  | T  | --          | --          | Intron          | SNP | 0.111 | 32 | 4  |
| TMCO4        | chr1 | 20020669 | A  | T  | --          | --          | Intron          | SNP | 0.705 | 13 | 31 |
| --           | chr1 | 20356919 | C  | A  | --          | --          | IGR             | SNP | 0.525 | 19 | 21 |
| --           | chr1 | 20356924 | C  | T  | --          | --          | IGR             | SNP | 0.538 | 18 | 21 |
| --           | chr1 | 20375966 | C  | T  | --          | --          | IGR             | SNP | 0.103 | 26 | 3  |
| --           | chr1 | 20433244 | C  | T  | --          | --          | IGR             | SNP | 0.519 | 26 | 28 |
| --           | chr1 | 20760822 | G  | T  | --          | --          | IGR             | SNP | 0.308 | 9  | 4  |
| --           | chr1 | 20771723 | C  | T  | --          | --          | IGR             | SNP | 0.375 | 35 | 21 |
| --           | chr1 | 20795428 | G  | A  | --          | --          | IGR             | SNP | 0.265 | 50 | 18 |
| CDA          | chr1 | 20927246 | C  | A  | --          | --          | Intron          | SNP | 0.267 | 11 | 4  |
| --           | chr1 | 21130957 | T  | C  | --          | --          | IGR             | SNP | 0.227 | 34 | 10 |
| EIF4G3       | chr1 | 21143435 | A  | C  | --          | --          | Intron          | SNP | 0.250 | 12 | 4  |
| EIF4G3       | chr1 | 21143461 | C  | T  | --          | --          | Intron          | SNP | 0.267 | 11 | 4  |
| EIF4G3       | chr1 | 21355462 | T  | C  | --          | --          | Intron          | SNP | 0.545 | 25 | 30 |
| EIF4G3       | chr1 | 21393643 | G  | T  | --          | --          | Intron          | SNP | 0.182 | 18 | 4  |
| ECE1         | chr1 | 21576422 | A  | C  | --          | --          | Intron          | SNP | 0.121 | 29 | 4  |
| RAP1GAP      | chr1 | 21966554 | T  | C  | --          | --          | Intron          | SNP | 0.375 | 5  | 3  |
| HSPG2        | chr1 | 22217475 | C  | T  | --          | --          | Intron          | SNP | 0.407 | 35 | 24 |
| --           | chr1 | 22553673 | A  | G  | --          | --          | IGR             | SNP | 0.219 | 25 | 7  |
| --           | chr1 | 22553674 | G  | T  | --          | --          | IGR             | SNP | 0.286 | 25 | 10 |
| C1QB         | chr1 | 22988756 | C  | T  | --          | --          | 3'Flank         | SNP | 0.304 | 39 | 17 |
| --           | chr1 | 23299753 | C  | G  | --          | --          | IGR             | SNP | 0.571 | 18 | 24 |
| LUZP1        | chr1 | 23485429 | C  | A  | --          | --          | Intron          | SNP | 0.235 | 13 | 4  |
| --           | chr1 | 23928508 | A  | G  | --          | --          | IGR             | SNP | 0.400 | 27 | 18 |
| --           | chr1 | 23970257 | C  | A  | --          | --          | IGR             | SNP | 0.167 | 30 | 6  |
| --           | chr1 | 23990050 | G  | A  | --          | --          | IGR             | SNP | 0.156 | 27 | 5  |
| --           | chr1 | 24159307 | T  | G  | --          | --          | IGR             | SNP | 0.167 | 25 | 5  |
| MYOM3        | chr1 | 24425682 | G  | T  | --          | --          | Intron          | SNP | 0.141 | 73 | 12 |
| LOC284632    | chr1 | 24538976 | G  | T  | --          | --          | 3'Flank         | SNP | 0.157 | 59 | 11 |
| CLIC4        | chr1 | 25135996 | C  | G  | --          | --          | Intron          | SNP | 0.324 | 25 | 12 |
| --           | chr1 | 25472544 | T  | A  | --          | --          | IGR             | SNP | 0.277 | 34 | 13 |
| --           | chr1 | 25854514 | C  | T  | --          | --          | IGR             | SNP | 0.673 | 16 | 33 |

|           |      |          |   |    |                         |                 |         |       |       |    |    |
|-----------|------|----------|---|----|-------------------------|-----------------|---------|-------|-------|----|----|
| LDLRAP1   | chr1 | 25874216 | T | G  | --                      | --              | Intron  | SNP   | 0.229 | 27 | 8  |
| --        | chr1 | 25931375 | G | A  | --                      | --              | IGR     | SNP   | 0.130 | 20 | 3  |
| MAN1C1    | chr1 | 26050541 | C | A  | --                      | --              | Intron  | SNP   | 0.136 | 19 | 3  |
| STMN1     | chr1 | 26232516 | C | T  | --                      | --              | 5'UTR   | SNP   | 0.429 | 20 | 15 |
| --        | chr1 | 26400041 | C | G  | --                      | --              | IGR     | SNP   | 0.528 | 17 | 19 |
| CEP85     | chr1 | 26583091 | C | T  | --                      | --              | Intron  | SNP   | 0.160 | 21 | 4  |
| ARID1A    | chr1 | 27050291 | C | A  | --                      | --              | Intron  | SNP   | 0.500 | 31 | 31 |
| --        | chr1 | 27233317 | G | T  | --                      | --              | IGR     | SNP   | 0.278 | 13 | 5  |
| --        | chr1 | 27329732 | C | G  | --                      | --              | IGR     | SNP   | 0.649 | 27 | 50 |
| WASF2     | chr1 | 27749140 | G | A  | --                      | --              | Intron  | SNP   | 0.222 | 21 | 6  |
| --        | chr1 | 27826893 | G | T  | --                      | --              | IGR     | SNP   | 0.333 | 6  | 3  |
| AHDC1     | chr1 | 27915819 | C | T  | --                      | --              | Intron  | SNP   | 0.297 | 45 | 19 |
| --        | chr1 | 28007380 | T | C  | --                      | --              | IGR     | SNP   | 0.235 | 13 | 4  |
| --        | chr1 | 28030546 | G | A  | --                      | --              | IGR     | SNP   | 0.179 | 23 | 5  |
| EYA3      | chr1 | 28396106 | T | G  | --                      | --              | Intron  | SNP   | 0.111 | 24 | 3  |
| PTAFR     | chr1 | 28502910 | C | T  | --                      | --              | Intron  | SNP   | 0.579 | 16 | 22 |
| --        | chr1 | 28979547 | G | C  | --                      | --              | IGR     | SNP   | 0.224 | 38 | 11 |
| EPB41     | chr1 | 29276086 | T | C  | --                      | --              | Intron  | SNP   | 0.421 | 11 | 8  |
| EPB41     | chr1 | 29282422 | G | C  | --                      | --              | Intron  | SNP   | 0.273 | 32 | 12 |
| EPB41     | chr1 | 29297716 | G | T  | --                      | --              | Intron  | SNP   | 0.308 | 9  | 4  |
| PTPRU     | chr1 | 29647810 | C | T  | --                      | --              | Intron  | SNP   | 0.333 | 28 | 14 |
| --        | chr1 | 29760537 | G | A  | --                      | --              | IGR     | SNP   | 0.368 | 24 | 14 |
| --        | chr1 | 29830812 | C | G  | --                      | --              | IGR     | SNP   | 0.404 | 28 | 19 |
| --        | chr1 | 30042548 | G | A  | --                      | --              | IGR     | SNP   | 0.349 | 41 | 22 |
| --        | chr1 | 30389904 | C | T  | --                      | --              | IGR     | SNP   | 0.447 | 21 | 17 |
| --        | chr1 | 30429044 | C | T  | --                      | --              | IGR     | SNP   | 0.288 | 37 | 15 |
| --        | chr1 | 30472882 | A | T  | --                      | --              | IGR     | SNP   | 0.159 | 37 | 7  |
| --        | chr1 | 30552449 | C | T  | --                      | --              | IGR     | SNP   | 0.333 | 20 | 10 |
| --        | chr1 | 30602105 | C | T  | --                      | --              | IGR     | SNP   | 0.423 | 15 | 11 |
| --        | chr1 | 30819712 | - | AG | --                      | --              | IGR     | INS   | 0.111 | 16 | 2  |
| --        | chr1 | 31400013 | A | G  | --                      | --              | IGR     | SNP   | 0.214 | 11 | 3  |
| PUM1      | chr1 | 31448364 | A | T  | --                      | --              | Intron  | SNP   | 0.235 | 13 | 4  |
| SPOCD1    | chr1 | 32258007 | G | A  | --                      | --              | Intron  | SNP   | 0.345 | 38 | 20 |
| --        | chr1 | 32351721 | A | C  | --                      | --              | IGR     | SNP   | 0.500 | 27 | 27 |
| --        | chr1 | 32531875 | G | T  | --                      | --              | IGR     | SNP   | 0.278 | 13 | 5  |
| KPNA6     | chr1 | 32637407 | G | C  | --                      | --              | 3'UTR   | SNP   | 0.558 | 23 | 29 |
| --        | chr1 | 33384185 | G | T  | --                      | --              | IGR     | SNP   | 0.200 | 32 | 8  |
| RNF19B    | chr1 | 33419687 | T | G  | --                      | --              | Intron  | SNP   | 0.205 | 35 | 9  |
| AK2       | chr1 | 33473431 | G | C  | --                      | --              | 3'Flank | SNP   | 0.157 | 43 | 8  |
| --        | chr1 | 33521051 | C | T  | --                      | --              | IGR     | SNP   | 0.362 | 37 | 21 |
| LOC402779 | chr1 | 34338566 | T | A  | --                      | --              | RNA     | SNP   | 0.103 | 52 | 6  |
| --        | chr1 | 34814662 | A | T  | --                      | --              | IGR     | SNP   | 0.449 | 27 | 22 |
| --        | chr1 | 34914994 | G | C  | --                      | --              | IGR     | SNP   | 0.438 | 18 | 14 |
| --        | chr1 | 35213090 | G | A  | --                      | --              | IGR     | SNP   | 0.250 | 30 | 10 |
| --        | chr1 | 35678825 | G | A  | --                      | --              | IGR     | SNP   | 0.320 | 34 | 16 |
| --        | chr1 | 36532086 | G | A  | --                      | --              | IGR     | SNP   | 0.640 | 9  | 16 |
| THRAP3    | chr1 | 36761593 | G | T  | --                      | --              | Intron  | SNP   | 0.176 | 14 | 3  |
| --        | chr1 | 37021470 | C | G  | --                      | --              | IGR     | SNP   | 0.556 | 24 | 30 |
| --        | chr1 | 37233562 | G | T  | --                      | --              | IGR     | SNP   | 0.243 | 28 | 9  |
| --        | chr1 | 37767844 | C | T  | --                      | --              | IGR     | SNP   | 0.397 | 38 | 25 |
| SNIP1     | chr1 | 38011071 | C | A  | --                      | --              | Intron  | SNP   | 0.200 | 16 | 4  |
| --        | chr1 | 38650913 | T | A  | --                      | --              | IGR     | SNP   | 0.353 | 33 | 18 |
| --        | chr1 | 39006187 | A | T  | --                      | --              | IGR     | SNP   | 0.622 | 14 | 23 |
| --        | chr1 | 39175361 | T | C  | --                      | --              | IGR     | SNP   | 0.275 | 29 | 11 |
| --        | chr1 | 39244038 | T | C  | --                      | --              | IGR     | SNP   | 0.339 | 37 | 19 |
| --        | chr1 | 39440291 | A | T  | --                      | --              | IGR     | SNP   | 0.160 | 21 | 4  |
| --        | chr1 | 40046404 | C | A  | --                      | --              | IGR     | SNP   | 0.395 | 23 | 15 |
| --        | chr1 | 40180910 | C | T  | --                      | --              | IGR     | SNP   | 0.191 | 38 | 9  |
| --        | chr1 | 40300291 | G | T  | --                      | --              | IGR     | SNP   | 0.143 | 18 | 3  |
| --        | chr1 | 40357287 | A | C  | --                      | --              | IGR     | SNP   | 0.178 | 37 | 8  |
| --        | chr1 | 40896160 | A | T  | --                      | --              | IGR     | SNP   | 0.172 | 24 | 5  |
| RIMS3     | chr1 | 41085388 | G | T  | --                      | --              | 3'Flank | SNP   | 0.353 | 22 | 12 |
| NFYC      | chr1 | 41190620 | C | T  | --                      | --              | Intron  | SNP   | 0.271 | 35 | 13 |
| NFYC      | chr1 | 41236396 | C | A  | C901A,C790A,Q301K,Q264K | Missense_mutati | SNP     | 0.349 | 41    | 22 |    |
| KCNQ4     | chr1 | 41283053 | G | A  | --                      | --              | Intron  | SNP   | 0.143 | 36 | 6  |
| --        | chr1 | 41404555 | A | C  | --                      | --              | IGR     | SNP   | 0.258 | 23 | 8  |
| SCMH1     | chr1 | 41614465 | T | C  | --                      | --              | Intron  | SNP   | 0.515 | 16 | 17 |
| HIVEP3    | chr1 | 41997248 | T | C  | --                      | --              | Intron  | SNP   | 0.885 | 3  | 23 |
| HIVEP3    | chr1 | 41997417 | A | G  | --                      | --              | Intron  | SNP   | 0.143 | 24 | 4  |
| HIVEP3    | chr1 | 41997497 | G | A  | --                      | --              | Intron  | SNP   | 0.160 | 21 | 4  |
| HIVEP3    | chr1 | 42038294 | C | G  | --                      | --              | Intron  | SNP   | 0.351 | 37 | 20 |
| HIVEP3    | chr1 | 42054912 | C | G  | --                      | --              | Intron  | SNP   | 0.195 | 33 | 8  |
| HIVEP3    | chr1 | 42323500 | C | T  | --                      | --              | Intron  | SNP   | 0.512 | 20 | 21 |
| --        | chr1 | 42457664 | A | G  | --                      | --              | IGR     | SNP   | 0.357 | 9  | 5  |
| --        | chr1 | 42457886 | C | T  | --                      | --              | IGR     | SNP   | 0.364 | 7  | 4  |
| --        | chr1 | 42457895 | T | C  | --                      | --              | IGR     | SNP   | 0.308 | 9  | 4  |
| --        | chr1 | 42457927 | A | T  | --                      | --              | IGR     | SNP   | 0.313 | 11 | 5  |
| --        | chr1 | 42547496 | C | G  | --                      | --              | IGR     | SNP   | 0.548 | 33 | 40 |
| --        | chr1 | 42577470 | C | G  | --                      | --              | IGR     | SNP   | 0.250 | 42 | 14 |
| --        | chr1 | 42608462 | C | T  | --                      | --              | IGR     | SNP   | 0.224 | 45 | 13 |

|             |      |          |             |     |        |       |         |     |       |    |    |
|-------------|------|----------|-------------|-----|--------|-------|---------|-----|-------|----|----|
| --          | chr1 | 42614409 | T           | C   | --     | --    | IGR     | SNP | 0.205 | 35 | 9  |
| RIMKLA      | chr1 | 42868454 | G           | A   | --     | --    | Intron  | SNP | 0.200 | 16 | 4  |
| CCDC30      | chr1 | 43102891 | C           | G   | --     | --    | Intron  | SNP | 0.400 | 27 | 18 |
| KDM4A       | chr1 | 44115590 | A           | C   | --     | --    | 5'Flank | SNP | 0.148 | 46 | 8  |
| ST3GAL3     | chr1 | 44371274 | G           | T   | --     | --    | Intron  | SNP | 0.273 | 8  | 3  |
| ST3GAL3     | chr1 | 44371277 | T           | C   | --     | --    | Intron  | SNP | 0.300 | 7  | 3  |
| ST3GAL3     | chr1 | 44377206 | C           | T   | --     | --    | Intron  | SNP | 0.185 | 22 | 5  |
| RNF220      | chr1 | 45002290 | C           | T   | --     | --    | Intron  | SNP | 0.256 | 32 | 11 |
| IPP         | chr1 | 46204541 | G           | A   | --     | --    | Intron  | SNP | 0.160 | 21 | 4  |
| --          | chr1 | 46234843 | A           | C   | --     | --    | IGR     | SNP | 0.185 | 44 | 10 |
| MAST2       | chr1 | 46313359 | C           | T   | --     | --    | Intron  | SNP | 0.391 | 14 | 9  |
| MAST2       | chr1 | 46384628 | C           | G   | --     | --    | Intron  | SNP | 0.484 | 16 | 15 |
| LOC10050742 | chr1 | 47032427 | C           | T   | --     | --    | RNA     | SNP | 0.306 | 34 | 15 |
| LOC10050742 | chr1 | 47032618 | C           | T   | --     | --    | RNA     | SNP | 0.200 | 40 | 10 |
| LOC10050742 | chr1 | 47032952 | C           | G   | --     | --    | RNA     | SNP | 0.300 | 28 | 12 |
| ATPAF1      | chr1 | 47114126 | T           | A   | --     | --    | Intron  | SNP | 0.378 | 28 | 17 |
| CYP4Z1      | chr1 | 47549221 | A           | C   | --     | --    | Intron  | SNP | 0.233 | 33 | 10 |
| CYP4Z1      | chr1 | 47555303 | -           | CAT | --     | --    | Intron  | INS | 0.128 | 41 | 6  |
| PDZK1IP1    | chr1 | 47650256 | T           | C   | --     | --    | Intron  | SNP | 0.200 | 12 | 3  |
| TAL1        | chr1 | 47692444 | G           | A   | --     | --    | Intron  | SNP | 0.196 | 37 | 9  |
| --          | chr1 | 48121640 | T           | G   | --     | --    | IGR     | SNP | 0.452 | 17 | 14 |
| LOC388630   | chr1 | 48272598 | G           | T   | --     | --    | Intron  | SNP | 0.340 | 31 | 16 |
| LOC388630   | chr1 | 48424797 | C           | T   | --     | --    | Intron  | SNP | 0.150 | 17 | 3  |
| --          | chr1 | 48521946 | G           | T   | --     | --    | IGR     | SNP | 0.263 | 42 | 15 |
| --          | chr1 | 48745001 | C           | T   | --     | --    | IGR     | SNP | 0.250 | 21 | 7  |
| SPATA6      | chr1 | 48816339 | T           | C   | --     | --    | Intron  | SNP | 0.121 | 29 | 4  |
| SPATA6      | chr1 | 48828302 | G           | T   | --     | --    | Intron  | SNP | 0.413 | 27 | 19 |
| SPATA6      | chr1 | 48879149 | G           | T   | --     | --    | Intron  | SNP | 0.429 | 4  | 3  |
| SPATA6      | chr1 | 48897986 | A           | T   | --     | --    | Intron  | SNP | 0.214 | 22 | 6  |
| AGBL4       | chr1 | 49743434 | C           | T   | --     | --    | Intron  | SNP | 0.148 | 23 | 4  |
| AGBL4       | chr1 | 49922492 | G           | A   | --     | --    | Intron  | SNP | 0.489 | 23 | 22 |
| AGBL4       | chr1 | 50056640 | T           | C   | --     | --    | Intron  | SNP | 0.185 | 22 | 5  |
| AGBL4       | chr1 | 50074712 | G           | C   | --     | --    | Intron  | SNP | 0.292 | 34 | 14 |
| AGBL4       | chr1 | 50114236 | T           | C   | --     | --    | Intron  | SNP | 0.286 | 25 | 10 |
| AGBL4       | chr1 | 50118669 | C           | T   | --     | --    | Intron  | SNP | 0.152 | 28 | 5  |
| AGBL4       | chr1 | 50120397 | A           | G   | --     | --    | Intron  | SNP | 0.250 | 9  | 3  |
| AGBL4       | chr1 | 50147710 | T           | A   | --     | --    | Intron  | SNP | 0.325 | 27 | 13 |
| AGBL4       | chr1 | 50315151 | TAC         | -   | --     | --    | Intron  | DEL | 0.143 | 12 | 2  |
| ELAVL4      | chr1 | 50571294 | G           | A   | --     | --    | Intron  | SNP | 0.250 | 27 | 9  |
| DMRTA2      | chr1 | 50884523 | G           | C   | C1443G | A481A | Silent  | SNP | 0.577 | 11 | 15 |
| FAF1        | chr1 | 51102968 | T           | A   | --     | --    | Intron  | SNP | 0.250 | 12 | 4  |
| --          | chr1 | 51817327 | C           | G   | --     | --    | IGR     | SNP | 0.405 | 22 | 15 |
| EPS15       | chr1 | 51973921 | AAG         | -   | --     | --    | Intron  | DEL | 0.133 | 13 | 2  |
| NRD1        | chr1 | 52283028 | C           | G   | --     | --    | Intron  | SNP | 0.385 | 8  | 5  |
| ZFYVE9      | chr1 | 52649545 | TG          | -   | --     | --    | Intron  | DEL | 0.125 | 21 | 3  |
| --          | chr1 | 53045116 | T           | G   | --     | --    | IGR     | SNP | 0.489 | 23 | 22 |
| SELRC1      | chr1 | 53162903 | C           | T   | --     | --    | Intron  | SNP | 0.111 | 32 | 4  |
| SELRC1      | chr1 | 53163279 | C           | G   | --     | --    | Intron  | SNP | 0.333 | 28 | 14 |
| SELRC1      | chr1 | 53163313 | C           | G   | --     | --    | Intron  | SNP | 0.224 | 38 | 11 |
| SCP2        | chr1 | 53469782 | G           | T   | --     | --    | Intron  | SNP | 0.190 | 34 | 8  |
| LRP8        | chr1 | 53780419 | A           | C   | --     | --    | Intron  | SNP | 0.259 | 43 | 15 |
| --          | chr1 | 53908438 | C           | T   | --     | --    | IGR     | SNP | 0.308 | 9  | 4  |
| YIPF1       | chr1 | 54348139 | C           | T   | --     | --    | Intron  | SNP | 0.161 | 26 | 5  |
| DIO1        | chr1 | 54375080 | ACTCTGTCTC- | --  | --     | --    | Intron  | DEL | 0.306 | 25 | 11 |
| SSBP3       | chr1 | 54774831 | T           | G   | --     | --    | Intron  | SNP | 0.324 | 46 | 22 |
| --          | chr1 | 54909434 | A           | G   | --     | --    | IGR     | SNP | 0.158 | 16 | 3  |
| --          | chr1 | 54909456 | -           | CA  | --     | --    | IGR     | INS | 0.107 | 25 | 3  |
| --          | chr1 | 54949787 | G           | A   | --     | --    | IGR     | SNP | 0.208 | 38 | 10 |
| --          | chr1 | 54993339 | ATCCCAGCTA- | --  | --     | --    | IGR     | DEL | 0.355 | 20 | 11 |
| C1orf177    | chr1 | 55285205 | A           | T   | --     | --    | Intron  | SNP | 0.211 | 45 | 12 |
| --          | chr1 | 55401668 | A           | G   | --     | --    | IGR     | SNP | 0.375 | 10 | 6  |
| --          | chr1 | 55407402 | C           | T   | --     | --    | IGR     | SNP | 0.542 | 27 | 32 |
| USP24       | chr1 | 55601024 | T           | A   | --     | --    | Intron  | SNP | 0.300 | 28 | 12 |
| --          | chr1 | 55752593 | A           | T   | --     | --    | IGR     | SNP | 0.551 | 22 | 27 |
| --          | chr1 | 55937442 | T           | C   | --     | --    | IGR     | SNP | 0.270 | 27 | 10 |
| --          | chr1 | 56034028 | C           | A   | --     | --    | IGR     | SNP | 0.137 | 44 | 7  |
| --          | chr1 | 56322511 | C           | T   | --     | --    | IGR     | SNP | 0.313 | 33 | 15 |
| --          | chr1 | 56380749 | CCA         | -   | --     | --    | IGR     | DEL | 0.158 | 16 | 3  |
| --          | chr1 | 56514729 | -           | CT  | --     | --    | IGR     | INS | 0.194 | 25 | 6  |
| --          | chr1 | 56604731 | C           | T   | --     | --    | IGR     | SNP | 0.150 | 34 | 6  |
| --          | chr1 | 56954368 | C           | G   | --     | --    | IGR     | SNP | 0.560 | 22 | 28 |
| C1orf168    | chr1 | 57191864 | C           | G   | --     | --    | Intron  | SNP | 0.419 | 25 | 18 |
| DAB1        | chr1 | 57771500 | G           | C   | --     | --    | Intron  | SNP | 0.256 | 29 | 10 |
| DAB1        | chr1 | 58071735 | G           | T   | --     | --    | Intron  | SNP | 0.606 | 13 | 20 |
| DAB1        | chr1 | 58072755 | C           | T   | --     | --    | Intron  | SNP | 0.590 | 16 | 23 |
| DAB1        | chr1 | 58160972 | GGAAA       | -   | --     | --    | Intron  | DEL | 0.200 | 28 | 7  |
| DAB1        | chr1 | 58265270 | C           | T   | --     | --    | Intron  | SNP | 0.500 | 9  | 9  |
| DAB1        | chr1 | 58265341 | C           | T   | --     | --    | Intron  | SNP | 0.680 | 8  | 17 |
| DAB1        | chr1 | 58330893 | A           | T   | --     | --    | Intron  | SNP | 0.527 | 26 | 29 |
| DAB1        | chr1 | 58402475 | T           | C   | --     | --    | Intron  | SNP | 0.309 | 38 | 17 |

|             |      |          |           |        |          |          |                 |     |       |    |    |
|-------------|------|----------|-----------|--------|----------|----------|-----------------|-----|-------|----|----|
| DAB1        | chr1 | 58463804 | C         | T      | --       | --       | Intron          | SNP | 0.656 | 11 | 21 |
| --          | chr1 | 58720531 | TTTATAGCC | -      | --       | --       | IGR             | DEL | 0.136 | 19 | 3  |
| OMA1        | chr1 | 58958072 | -         | GAAAAT | --       | --       | Intron          | INS | 0.188 | 13 | 3  |
| --          | chr1 | 59209626 | C         | T      | --       | --       | IGR             | SNP | 0.160 | 42 | 8  |
| LOC10013106 | chr1 | 59270610 | C         | T      | --       | --       | RNA             | SNP | 0.583 | 25 | 35 |
| --          | chr1 | 59492784 | A         | T      | --       | --       | IGR             | SNP | 0.109 | 49 | 6  |
| --          | chr1 | 59517727 | T         | A      | --       | --       | IGR             | SNP | 0.364 | 7  | 4  |
| FGGY        | chr1 | 60057118 | C         | G      | --       | --       | Intron          | SNP | 0.143 | 18 | 3  |
| FGGY        | chr1 | 60057148 | C         | T      | --       | --       | Intron          | SNP | 0.214 | 11 | 3  |
| FGGY        | chr1 | 60057178 | -         | AG     | --       | --       | Intron          | INS | 0.160 | 21 | 4  |
| FGGY        | chr1 | 60077642 | A         | G      | --       | --       | Intron          | SNP | 0.111 | 24 | 3  |
| HOOK1       | chr1 | 60302249 | T         | C      | --       | --       | Intron          | SNP | 0.625 | 12 | 20 |
| --          | chr1 | 60446301 | C         | T      | --       | --       | IGR             | SNP | 0.283 | 33 | 13 |
| --          | chr1 | 60550806 | C         | T      | --       | --       | IGR             | SNP | 0.350 | 26 | 14 |
| --          | chr1 | 61211339 | A         | G      | --       | --       | IGR             | SNP | 0.556 | 16 | 20 |
| --          | chr1 | 61281986 | T         | A      | --       | --       | IGR             | SNP | 0.190 | 34 | 8  |
| --          | chr1 | 61281988 | A         | T      | --       | --       | IGR             | SNP | 0.116 | 38 | 5  |
| --          | chr1 | 61427393 | A         | T      | --       | --       | IGR             | SNP | 0.143 | 48 | 8  |
| NFIA        | chr1 | 61723533 | G         | T      | --       | --       | Intron          | SNP | 0.174 | 19 | 4  |
| NFIA        | chr1 | 61845074 | C         | T      | --       | --       | Intron          | SNP | 0.222 | 14 | 4  |
| --          | chr1 | 62194957 | G         | A      | --       | --       | IGR             | SNP | 0.259 | 20 | 7  |
| INADL       | chr1 | 62216702 | C         | T      | --       | --       | Intron          | SNP | 0.143 | 18 | 3  |
| INADL       | chr1 | 62249090 | C         | T      | --       | --       | Intron          | SNP | 0.240 | 19 | 6  |
| INADL       | chr1 | 62260609 | G         | A      | --       | --       | Intron          | SNP | 0.533 | 14 | 16 |
| INADL       | chr1 | 62281100 | C         | T      | --       | --       | Intron          | SNP | 0.720 | 14 | 36 |
| INADL       | chr1 | 62419688 | A         | T      | --       | --       | Intron          | SNP | 0.163 | 41 | 8  |
| INADL       | chr1 | 62570403 | G         | C      | --       | --       | Intron          | SNP | 0.260 | 37 | 13 |
| KANK4       | chr1 | 62745970 | G         | A      | --       | --       | Intron          | SNP | 0.629 | 23 | 39 |
| DOCK7       | chr1 | 63049660 | G         | C      | --       | --       | Intron          | SNP | 0.105 | 34 | 4  |
| --          | chr1 | 63620353 | C         | T      | --       | --       | IGR             | SNP | 0.614 | 22 | 35 |
| LINC00466   | chr1 | 63631226 | C         | T      | --       | --       | RNA             | SNP | 0.174 | 38 | 8  |
| --          | chr1 | 63816747 | G         | A      | --       | --       | IGR             | SNP | 0.152 | 28 | 5  |
| PGM1        | chr1 | 64069952 | C         | G      | --       | --       | Intron          | SNP | 0.323 | 44 | 21 |
| JAK1        | chr1 | 65326611 | C         | G      | --       | --       | Intron          | SNP | 0.200 | 20 | 5  |
| DNAJC6      | chr1 | 65849807 | C         | G      | --       | --       | Intron          | SNP | 0.568 | 16 | 21 |
| LEPR        | chr1 | 65931756 | G         | A      | --       | --       | Intron          | SNP | 0.208 | 19 | 5  |
| --          | chr1 | 66236407 | T         | C      | --       | --       | IGR             | SNP | 0.543 | 21 | 25 |
| --          | chr1 | 66236520 | T         | C      | --       | --       | IGR             | SNP | 0.650 | 14 | 26 |
| SGIP1       | chr1 | 67125823 | -         | GA     | --       | --       | Intron          | INS | 0.105 | 17 | 2  |
| TCTEX1D1    | chr1 | 67230953 | T         | A      | --       | --       | Intron          | SNP | 0.676 | 12 | 25 |
| WDR78       | chr1 | 67301957 | A         | G      | --       | --       | Intron          | SNP | 0.346 | 17 | 9  |
| WDR78       | chr1 | 67301961 | A         | G      | --       | --       | Intron          | SNP | 0.148 | 23 | 4  |
| WDR78       | chr1 | 67324236 | C         | A      | --       | --       | Intron          | SNP | 0.241 | 22 | 7  |
| IL23R       | chr1 | 67642714 | G         | T      | --       | --       | Intron          | SNP | 0.107 | 25 | 3  |
| IL23R       | chr1 | 67642975 | T         | A      | --       | --       | Intron          | SNP | 0.200 | 12 | 3  |
| IL23R       | chr1 | 67693787 | T         | C      | --       | --       | Intron          | SNP | 0.200 | 20 | 5  |
| --          | chr1 | 67990458 | G         | T      | --       | --       | IGR             | SNP | 0.304 | 32 | 14 |
| --          | chr1 | 68039029 | G         | T      | --       | --       | IGR             | SNP | 0.338 | 43 | 22 |
| LOC10028917 | chr1 | 68432005 | G         | A      | --       | --       | RNA             | SNP | 0.682 | 14 | 30 |
| DIRAS3      | chr1 | 68512887 | TG        | -      | 93_94del | 31_32del | Frame_Shift_Del | DEL | 0.662 | 25 | 49 |
| LOC10028917 | chr1 | 68635839 | A         | T      | --       | --       | RNA             | SNP | 0.136 | 19 | 3  |
| WLS         | chr1 | 68691067 | T         | C      | --       | --       | Intron          | SNP | 0.632 | 7  | 12 |
| --          | chr1 | 68759543 | T         | A      | --       | --       | IGR             | SNP | 0.706 | 15 | 36 |
| --          | chr1 | 68876900 | C         | A      | --       | --       | IGR             | SNP | 0.333 | 14 | 7  |
| --          | chr1 | 69071538 | C         | G      | --       | --       | IGR             | SNP | 0.300 | 28 | 12 |
| --          | chr1 | 69140700 | A         | G      | --       | --       | IGR             | SNP | 0.108 | 33 | 4  |
| --          | chr1 | 69311615 | G         | T      | --       | --       | IGR             | SNP | 0.323 | 21 | 10 |
| --          | chr1 | 69461600 | C         | T      | --       | --       | IGR             | SNP | 0.160 | 21 | 4  |
| --          | chr1 | 69464396 | T         | C      | --       | --       | IGR             | SNP | 0.143 | 18 | 3  |
| --          | chr1 | 69629249 | G         | T      | --       | --       | IGR             | SNP | 0.636 | 16 | 28 |
| --          | chr1 | 69630702 | C         | A      | --       | --       | IGR             | SNP | 0.114 | 39 | 5  |
| --          | chr1 | 69740388 | A         | C      | --       | --       | IGR             | SNP | 0.250 | 27 | 9  |
| --          | chr1 | 70095231 | A         | C      | --       | --       | IGR             | SNP | 0.583 | 15 | 21 |
| LRRC7       | chr1 | 70342422 | C         | G      | --       | --       | Intron          | SNP | 0.234 | 36 | 11 |
| LRRC7       | chr1 | 70375194 | T         | A      | --       | --       | Intron          | SNP | 0.136 | 19 | 3  |
| LRRC7       | chr1 | 70375210 | T         | C      | --       | --       | Intron          | SNP | 0.136 | 19 | 3  |
| LRRC7       | chr1 | 70393163 | C         | A      | --       | --       | Intron          | SNP | 0.625 | 3  | 5  |
| LRRC7       | chr1 | 70393164 | A         | T      | --       | --       | Intron          | SNP | 0.625 | 3  | 5  |
| LRRC7       | chr1 | 70563184 | T         | G      | --       | --       | Intron          | SNP | 0.345 | 19 | 10 |
| --          | chr1 | 70596419 | C         | G      | --       | --       | IGR             | SNP | 0.341 | 29 | 15 |
| --          | chr1 | 70835994 | C         | T      | --       | --       | IGR             | SNP | 0.262 | 31 | 11 |
| --          | chr1 | 70959424 | CATT      | -      | --       | --       | IGR             | DEL | 0.111 | 16 | 2  |
| --          | chr1 | 71190118 | G         | T      | --       | --       | IGR             | SNP | 0.217 | 36 | 10 |
| --          | chr1 | 71261125 | A         | G      | --       | --       | IGR             | SNP | 0.286 | 20 | 8  |
| --          | chr1 | 71261239 | A         | C      | --       | --       | IGR             | SNP | 0.269 | 19 | 7  |
| PTGER3      | chr1 | 71396775 | A         | G      | --       | --       | Intron          | SNP | 0.349 | 28 | 15 |
| PTGER3      | chr1 | 71433153 | GT        | -      | --       | --       | Intron          | DEL | 0.259 | 20 | 7  |
| --          | chr1 | 71585972 | C         | G      | --       | --       | IGR             | SNP | 0.267 | 11 | 4  |
| --          | chr1 | 71624284 | A         | G      | --       | --       | IGR             | SNP | 0.538 | 18 | 21 |
| --          | chr1 | 71689520 | G         | T      | --       | --       | IGR             | SNP | 0.237 | 29 | 9  |

|             |      |          |    |     |    |    |        |     |       |    |    |
|-------------|------|----------|----|-----|----|----|--------|-----|-------|----|----|
| NEGR1       | chr1 | 71900802 | A  | C   | -- | -- | Intron | SNP | 0.333 | 12 | 6  |
| NEGR1       | chr1 | 72183996 | C  | T   | -- | -- | Intron | SNP | 0.267 | 22 | 8  |
| NEGR1       | chr1 | 72225327 | C  | G   | -- | -- | Intron | SNP | 0.563 | 7  | 9  |
| NEGR1       | chr1 | 72309670 | A  | G   | -- | -- | Intron | SNP | 0.324 | 23 | 11 |
| NEGR1       | chr1 | 72371386 | A  | G   | -- | -- | Intron | SNP | 0.333 | 26 | 13 |
| NEGR1       | chr1 | 72569280 | G  | A   | -- | -- | Intron | SNP | 0.486 | 19 | 18 |
| NEGR1       | chr1 | 72645137 | T  | A   | -- | -- | Intron | SNP | 0.179 | 32 | 7  |
| NEGR1       | chr1 | 72671592 | C  | G   | -- | -- | Intron | SNP | 0.300 | 21 | 9  |
| --          | chr1 | 72847106 | G  | A   | -- | -- | IGR    | SNP | 0.279 | 31 | 12 |
| --          | chr1 | 72949190 | A  | G   | -- | -- | IGR    | SNP | 0.276 | 21 | 8  |
| --          | chr1 | 73166931 | A  | G   | -- | -- | IGR    | SNP | 0.342 | 25 | 13 |
| --          | chr1 | 73265650 | G  | A   | -- | -- | IGR    | SNP | 0.394 | 20 | 13 |
| --          | chr1 | 73315345 | C  | A   | -- | -- | IGR    | SNP | 0.235 | 13 | 4  |
| --          | chr1 | 73456551 | T  | C   | -- | -- | IGR    | SNP | 0.182 | 18 | 4  |
| --          | chr1 | 73741005 | C  | A   | -- | -- | IGR    | SNP | 0.375 | 15 | 9  |
| --          | chr1 | 73744791 | A  | C   | -- | -- | IGR    | SNP | 0.292 | 17 | 7  |
| --          | chr1 | 73805335 | T  | G   | -- | -- | IGR    | SNP | 0.368 | 12 | 7  |
| --          | chr1 | 73855215 | G  | T   | -- | -- | IGR    | SNP | 0.441 | 19 | 15 |
| --          | chr1 | 73886010 | C  | A   | -- | -- | IGR    | SNP | 0.250 | 30 | 10 |
| --          | chr1 | 74014418 | C  | T   | -- | -- | IGR    | SNP | 0.750 | 7  | 21 |
| --          | chr1 | 74042147 | C  | T   | -- | -- | IGR    | SNP | 0.200 | 16 | 4  |
| --          | chr1 | 74077099 | C  | A   | -- | -- | IGR    | SNP | 0.257 | 26 | 9  |
| --          | chr1 | 74131705 | T  | C   | -- | -- | IGR    | SNP | 0.229 | 27 | 8  |
| --          | chr1 | 74276205 | A  | C   | -- | -- | IGR    | SNP | 0.360 | 32 | 18 |
| --          | chr1 | 74344948 | G  | A   | -- | -- | IGR    | SNP | 0.350 | 26 | 14 |
| --          | chr1 | 74345218 | T  | C   | -- | -- | IGR    | SNP | 0.311 | 42 | 19 |
| --          | chr1 | 74482588 | -  | TA  | -- | -- | IGR    | INS | 0.176 | 14 | 3  |
| --          | chr1 | 74487780 | C  | T   | -- | -- | IGR    | SNP | 0.455 | 18 | 15 |
| LRR1Q3      | chr1 | 74505245 | A  | T   | -- | -- | Intron | SNP | 0.282 | 28 | 11 |
| LRR1Q3      | chr1 | 74567421 | G  | C   | -- | -- | Intron | SNP | 0.190 | 17 | 4  |
| FPGT-TNNI3K | chr1 | 74723371 | G  | T   | -- | -- | Intron | SNP | 0.364 | 7  | 4  |
| FPGT-TNNI3K | chr1 | 74985541 | T  | A   | -- | -- | Intron | SNP | 0.216 | 29 | 8  |
| C1orf173    | chr1 | 75127409 | C  | A   | -- | -- | Intron | SNP | 0.500 | 17 | 17 |
| CRYZ        | chr1 | 75189655 | G  | T   | -- | -- | Intron | SNP | 0.316 | 26 | 12 |
| --          | chr1 | 75578028 | G  | A   | -- | -- | IGR    | SNP | 0.231 | 10 | 3  |
| LHX8        | chr1 | 75616781 | A  | C   | -- | -- | Intron | SNP | 0.250 | 18 | 6  |
| --          | chr1 | 75648076 | G  | T   | -- | -- | IGR    | SNP | 0.267 | 11 | 4  |
| MSH4        | chr1 | 76326946 | C  | T   | -- | -- | Intron | SNP | 0.636 | 16 | 28 |
| ST6GALNAC5  | chr1 | 76793297 | A  | T   | -- | -- | Intron | SNP | 0.372 | 27 | 16 |
| ST6GALNAC5  | chr1 | 76849235 | G  | A   | -- | -- | Intron | SNP | 0.313 | 22 | 10 |
| ST6GALNAC5  | chr1 | 76852021 | A  | C   | -- | -- | Intron | SNP | 0.158 | 32 | 6  |
| --          | chr1 | 77098163 | A  | T   | -- | -- | IGR    | SNP | 0.257 | 26 | 9  |
| --          | chr1 | 77110278 | TC | -   | -- | -- | IGR    | DEL | 0.327 | 35 | 17 |
| --          | chr1 | 77175570 | G  | A   | -- | -- | IGR    | SNP | 0.600 | 18 | 27 |
| --          | chr1 | 77240060 | G  | A   | -- | -- | IGR    | SNP | 0.600 | 14 | 21 |
| --          | chr1 | 77246128 | G  | A   | -- | -- | IGR    | SNP | 0.538 | 12 | 14 |
| --          | chr1 | 77286249 | C  | T   | -- | -- | IGR    | SNP | 0.229 | 37 | 11 |
| ST6GALNAC5  | chr1 | 77379948 | G  | A   | -- | -- | Intron | SNP | 0.500 | 3  | 3  |
| PIGK        | chr1 | 77654383 | G  | T   | -- | -- | Intron | SNP | 0.200 | 20 | 5  |
| AK5         | chr1 | 77769219 | C  | T   | -- | -- | Intron | SNP | 0.289 | 27 | 11 |
| AK5         | chr1 | 77912989 | A  | C   | -- | -- | Intron | SNP | 0.667 | 15 | 30 |
| AK5         | chr1 | 77970116 | -  | GTA | -- | -- | Intron | INS | 0.524 | 10 | 11 |
| AK5         | chr1 | 78008543 | G  | A   | -- | -- | Intron | SNP | 0.121 | 29 | 4  |
| --          | chr1 | 78491232 | T  | A   | -- | -- | IGR    | SNP | 0.235 | 13 | 4  |
| GIPC2       | chr1 | 78557143 | G  | T   | -- | -- | Intron | SNP | 0.182 | 36 | 8  |
| MGC27382    | chr1 | 78783634 | A  | G   | -- | -- | RNA    | SNP | 0.188 | 13 | 3  |
| MGC27382    | chr1 | 78784099 | C  | A   | -- | -- | RNA    | SNP | 0.282 | 28 | 11 |
| --          | chr1 | 78858460 | -  | TAA | -- | -- | IGR    | INS | 0.324 | 25 | 12 |
| --          | chr1 | 79223599 | C  | A   | -- | -- | IGR    | SNP | 0.217 | 18 | 5  |
| ELTD1       | chr1 | 79366511 | G  | T   | -- | -- | Intron | SNP | 0.259 | 20 | 7  |
| --          | chr1 | 79486828 | T  | A   | -- | -- | IGR    | SNP | 0.567 | 13 | 17 |
| --          | chr1 | 79792749 | G  | A   | -- | -- | IGR    | SNP | 0.400 | 27 | 18 |
| --          | chr1 | 79808550 | C  | A   | -- | -- | IGR    | SNP | 0.579 | 16 | 22 |
| --          | chr1 | 79862995 | G  | A   | -- | -- | IGR    | SNP | 0.314 | 24 | 11 |
| --          | chr1 | 79872115 | C  | A   | -- | -- | IGR    | SNP | 0.200 | 32 | 8  |
| --          | chr1 | 79976310 | -  | AT  | -- | -- | IGR    | INS | 0.293 | 29 | 12 |
| --          | chr1 | 80089655 | G  | T   | -- | -- | IGR    | SNP | 0.364 | 7  | 4  |
| --          | chr1 | 80105932 | C  | T   | -- | -- | IGR    | SNP | 0.143 | 24 | 4  |
| --          | chr1 | 80105957 | T  | C   | -- | -- | IGR    | SNP | 0.172 | 24 | 5  |
| --          | chr1 | 80151045 | T  | A   | -- | -- | IGR    | SNP | 0.300 | 21 | 9  |
| --          | chr1 | 80172385 | C  | A   | -- | -- | IGR    | SNP | 0.237 | 29 | 9  |
| --          | chr1 | 80216113 | T  | C   | -- | -- | IGR    | SNP | 0.138 | 25 | 4  |
| --          | chr1 | 80225856 | T  | C   | -- | -- | IGR    | SNP | 0.200 | 16 | 4  |
| --          | chr1 | 80420102 | C  | T   | -- | -- | IGR    | SNP | 0.353 | 22 | 12 |
| --          | chr1 | 80578978 | T  | G   | -- | -- | IGR    | SNP | 0.365 | 33 | 19 |
| --          | chr1 | 80599707 | G  | A   | -- | -- | IGR    | SNP | 0.500 | 3  | 3  |
| --          | chr1 | 80700082 | G  | T   | -- | -- | IGR    | SNP | 0.186 | 35 | 8  |
| --          | chr1 | 81433069 | T  | C   | -- | -- | IGR    | SNP | 0.289 | 27 | 11 |
| --          | chr1 | 81446436 | TC | -   | -- | -- | IGR    | DEL | 0.103 | 26 | 3  |
| --          | chr1 | 81717732 | T  | A   | -- | -- | IGR    | SNP | 0.231 | 10 | 3  |

|                |      |          |    |     |    |    |         |     |       |    |    |
|----------------|------|----------|----|-----|----|----|---------|-----|-------|----|----|
| --             | chr1 | 82542901 | A  | G   | -- | -- | IGR     | SNP | 0.405 | 22 | 15 |
| --             | chr1 | 82697259 | -  | GTA | -- | -- | IGR     | INS | 0.163 | 35 | 7  |
| --             | chr1 | 82852139 | C  | T   | -- | -- | IGR     | SNP | 0.488 | 21 | 20 |
| --             | chr1 | 82898059 | A  | T   | -- | -- | IGR     | SNP | 0.243 | 28 | 9  |
| --             | chr1 | 82950385 | A  | T   | -- | -- | IGR     | SNP | 0.529 | 24 | 27 |
| --             | chr1 | 83092218 | T  | C   | -- | -- | IGR     | SNP | 0.300 | 28 | 12 |
| --             | chr1 | 83166223 | G  | A   | -- | -- | IGR     | SNP | 0.561 | 18 | 23 |
| --             | chr1 | 83379713 | C  | A   | -- | -- | IGR     | SNP | 0.650 | 7  | 13 |
| --             | chr1 | 83411959 | C  | A   | -- | -- | IGR     | SNP | 0.378 | 23 | 14 |
| --             | chr1 | 83600937 | -  | GA  | -- | -- | IGR     | INS | 0.105 | 34 | 4  |
| --             | chr1 | 83617876 | TG | -   | -- | -- | IGR     | DEL | 0.160 | 21 | 4  |
| --             | chr1 | 83912710 | C  | T   | -- | -- | IGR     | SNP | 0.130 | 40 | 6  |
| --             | chr1 | 84303101 | T  | C   | -- | -- | IGR     | SNP | 0.162 | 31 | 6  |
| --             | chr1 | 84315915 | C  | T   | -- | -- | IGR     | SNP | 0.250 | 30 | 10 |
| <i>TLL7</i>    | chr1 | 84358255 | A  | G   | -- | -- | Intron  | SNP | 0.214 | 11 | 3  |
| <i>TLL7</i>    | chr1 | 84358256 | T  | A   | -- | -- | Intron  | SNP | 0.214 | 11 | 3  |
| <i>TLL7</i>    | chr1 | 84398835 | -  | TG  | -- | -- | Intron  | INS | 0.565 | 20 | 26 |
| <i>PRKACB</i>  | chr1 | 84559925 | G  | A   | -- | -- | Intron  | SNP | 0.146 | 35 | 6  |
| <i>PRKACB</i>  | chr1 | 84605521 | C  | T   | -- | -- | Intron  | SNP | 0.290 | 22 | 9  |
| <i>UOX</i>     | chr1 | 84836524 | A  | T   | -- | -- | RNA     | SNP | 0.132 | 33 | 5  |
| --             | chr1 | 84942349 | T  | G   | -- | -- | IGR     | SNP | 0.706 | 5  | 12 |
| <i>DDAH1</i>   | chr1 | 85932512 | A  | T   | -- | -- | Intron  | SNP | 0.444 | 5  | 4  |
| <i>DDAH1</i>   | chr1 | 85939630 | T  | A   | -- | -- | Intron  | SNP | 0.220 | 39 | 11 |
| <i>DDAH1</i>   | chr1 | 85942356 | C  | A   | -- | -- | Intron  | SNP | 0.235 | 39 | 12 |
| <i>DDAH1</i>   | chr1 | 85985395 | G  | C   | -- | -- | Intron  | SNP | 0.113 | 63 | 8  |
| --             | chr1 | 86065657 | C  | A   | -- | -- | IGR     | SNP | 0.184 | 40 | 9  |
| --             | chr1 | 86191175 | A  | T   | -- | -- | IGR     | SNP | 0.286 | 10 | 4  |
| <i>COL24A1</i> | chr1 | 86417058 | G  | T   | -- | -- | Intron  | SNP | 0.179 | 32 | 7  |
| <i>COL24A1</i> | chr1 | 86417070 | A  | G   | -- | -- | Intron  | SNP | 0.152 | 39 | 7  |
| <i>COL24A1</i> | chr1 | 86601497 | TG | -   | -- | -- | Intron  | DEL | 0.263 | 28 | 10 |
| --             | chr1 | 86624818 | C  | T   | -- | -- | IGR     | SNP | 0.184 | 40 | 9  |
| --             | chr1 | 86629466 | G  | A   | -- | -- | IGR     | SNP | 0.400 | 6  | 4  |
| --             | chr1 | 87071517 | T  | C   | -- | -- | IGR     | SNP | 0.190 | 34 | 8  |
| --             | chr1 | 87587700 | A  | G   | -- | -- | IGR     | SNP | 0.268 | 30 | 11 |
| --             | chr1 | 87768137 | T  | C   | -- | -- | IGR     | SNP | 0.302 | 30 | 13 |
| --             | chr1 | 88000270 | G  | C   | -- | -- | IGR     | SNP | 0.194 | 25 | 6  |
| --             | chr1 | 88303345 | A  | T   | -- | -- | IGR     | SNP | 0.111 | 24 | 3  |
| --             | chr1 | 88475356 | G  | A   | -- | -- | IGR     | SNP | 0.370 | 29 | 17 |
| --             | chr1 | 88731861 | G  | C   | -- | -- | IGR     | SNP | 0.595 | 15 | 22 |
| --             | chr1 | 88784057 | A  | C   | -- | -- | IGR     | SNP | 0.242 | 25 | 8  |
| --             | chr1 | 88886666 | G  | T   | -- | -- | IGR     | SNP | 0.220 | 32 | 9  |
| --             | chr1 | 89021944 | T  | C   | -- | -- | IGR     | SNP | 0.308 | 27 | 12 |
| --             | chr1 | 89117189 | G  | A   | -- | -- | IGR     | SNP | 0.516 | 15 | 16 |
| <i>GBP2</i>    | chr1 | 89581610 | C  | A   | -- | -- | Intron  | SNP | 0.267 | 22 | 8  |
| --             | chr1 | 89593104 | G  | T   | -- | -- | IGR     | SNP | 0.489 | 24 | 23 |
| <i>LRR8B</i>   | chr1 | 89989978 | C  | A   | -- | -- | 5'Flank | SNP | 0.196 | 45 | 11 |
| <i>LRR8C</i>   | chr1 | 90137191 | G  | C   | -- | -- | Intron  | SNP | 0.321 | 38 | 18 |
| <i>LRR8D</i>   | chr1 | 90313255 | G  | C   | -- | -- | Intron  | SNP | 0.314 | 24 | 11 |
| <i>LRR8D</i>   | chr1 | 90334295 | C  | T   | -- | -- | Intron  | SNP | 0.417 | 21 | 15 |
| --             | chr1 | 91561707 | G  | A   | -- | -- | IGR     | SNP | 0.222 | 14 | 4  |
| --             | chr1 | 91697738 | C  | T   | -- | -- | IGR     | SNP | 0.349 | 28 | 15 |
| <i>HFM1</i>    | chr1 | 91785292 | T  | A   | -- | -- | Intron  | SNP | 0.171 | 29 | 6  |
| <i>HFM1</i>    | chr1 | 91805272 | C  | T   | -- | -- | Intron  | SNP | 0.250 | 21 | 7  |
| <i>TGFBR3</i>  | chr1 | 92291371 | C  | G   | -- | -- | Intron  | SNP | 0.542 | 11 | 13 |
| <i>TGFBR3</i>  | chr1 | 92371020 | C  | T   | -- | -- | Intron  | SNP | 0.676 | 12 | 25 |
| <i>EVI5</i>    | chr1 | 93050396 | G  | T   | -- | -- | Intron  | SNP | 0.105 | 34 | 4  |
| <i>EVI5</i>    | chr1 | 93079052 | C  | T   | -- | -- | Intron  | SNP | 0.333 | 24 | 12 |
| <i>FAM69A</i>  | chr1 | 93412556 | T  | A   | -- | -- | Intron  | SNP | 0.600 | 10 | 15 |
| --             | chr1 | 93429152 | G  | A   | -- | -- | IGR     | SNP | 0.554 | 25 | 31 |
| <i>MTF2</i>    | chr1 | 93545976 | C  | G   | -- | -- | Intron  | SNP | 0.167 | 30 | 6  |
| <i>CCDC18</i>  | chr1 | 93743228 | T  | G   | -- | -- | Intron  | SNP | 0.130 | 20 | 3  |
| --             | chr1 | 93911667 | T  | A   | -- | -- | IGR     | SNP | 0.235 | 13 | 4  |
| --             | chr1 | 94326212 | T  | C   | -- | -- | IGR     | SNP | 0.333 | 12 | 6  |
| <i>ABCD3</i>   | chr1 | 94916963 | A  | T   | -- | -- | Intron  | SNP | 0.333 | 24 | 12 |
| --             | chr1 | 95026351 | C  | T   | -- | -- | IGR     | SNP | 0.200 | 16 | 4  |
| --             | chr1 | 95766451 | T  | C   | -- | -- | IGR     | SNP | 0.413 | 27 | 19 |
| --             | chr1 | 96082358 | A  | T   | -- | -- | IGR     | SNP | 0.375 | 15 | 9  |
| --             | chr1 | 96159622 | C  | G   | -- | -- | IGR     | SNP | 0.311 | 31 | 14 |
| --             | chr1 | 96338129 | TA | -   | -- | -- | IGR     | DEL | 0.611 | 14 | 22 |
| --             | chr1 | 96378733 | A  | C   | -- | -- | IGR     | SNP | 0.261 | 34 | 12 |
| --             | chr1 | 96619150 | C  | G   | -- | -- | IGR     | SNP | 0.395 | 23 | 15 |
| --             | chr1 | 96737909 | C  | G   | -- | -- | IGR     | SNP | 0.395 | 23 | 15 |
| --             | chr1 | 96789525 | AG | -   | -- | -- | IGR     | DEL | 0.194 | 29 | 7  |
| --             | chr1 | 96817045 | C  | T   | -- | -- | IGR     | SNP | 0.296 | 19 | 8  |
| --             | chr1 | 97044519 | C  | A   | -- | -- | IGR     | SNP | 0.290 | 22 | 9  |
| --             | chr1 | 97070452 | C  | A   | -- | -- | IGR     | SNP | 0.167 | 20 | 4  |
| --             | chr1 | 97366166 | C  | A   | -- | -- | IGR     | SNP | 0.244 | 34 | 11 |
| --             | chr1 | 97444156 | C  | A   | -- | -- | IGR     | SNP | 0.179 | 32 | 7  |
| <i>DPYD</i>    | chr1 | 97557721 | C  | A   | -- | -- | Intron  | SNP | 0.184 | 40 | 9  |
| <i>DPYD</i>    | chr1 | 97767445 | C  | G   | -- | -- | Intron  | SNP | 0.513 | 19 | 20 |

|             |      |           |     |     |        |       |        |     |       |    |    |
|-------------|------|-----------|-----|-----|--------|-------|--------|-----|-------|----|----|
| DPYD        | chr1 | 97929021  | A   | T   | --     | --    | Intron | SNP | 0.205 | 31 | 8  |
| DPYD        | chr1 | 97944352  | A   | G   | --     | --    | Intron | SNP | 0.296 | 38 | 16 |
| DPYD        | chr1 | 97966946  | G   | A   | --     | --    | Intron | SNP | 0.243 | 28 | 9  |
| DPYD        | chr1 | 98265968  | C   | T   | --     | --    | Intron | SNP | 0.194 | 29 | 7  |
| DPYD        | chr1 | 98277941  | T   | A   | --     | --    | Intron | SNP | 0.639 | 13 | 23 |
| DPYD        | chr1 | 98277952  | C   | A   | --     | --    | Intron | SNP | 0.389 | 22 | 14 |
| DPYD        | chr1 | 98384282  | G   | C   | --     | --    | Intron | SNP | 0.191 | 38 | 9  |
| --          | chr1 | 98415981  | C   | G   | --     | --    | IGR    | SNP | 0.214 | 22 | 6  |
| --          | chr1 | 98540109  | G   | T   | --     | --    | IGR    | SNP | 0.273 | 24 | 9  |
| --          | chr1 | 98625914  | C   | A   | --     | --    | IGR    | SNP | 0.438 | 9  | 7  |
| --          | chr1 | 98625924  | -   | AC  | --     | --    | IGR    | INS | 0.111 | 16 | 2  |
| --          | chr1 | 98726760  | C   | T   | --     | --    | IGR    | SNP | 0.200 | 28 | 7  |
| --          | chr1 | 98741042  | A   | G   | --     | --    | IGR    | SNP | 0.375 | 15 | 9  |
| --          | chr1 | 99056553  | A   | C   | --     | --    | IGR    | SNP | 0.200 | 12 | 3  |
| SNX7        | chr1 | 99130570  | C   | G   | --     | --    | Intron | SNP | 0.542 | 11 | 13 |
| LOC10012962 | chr1 | 99567580  | A   | C   | --     | --    | RNA    | SNP | 0.111 | 24 | 3  |
| LOC10012962 | chr1 | 99567588  | T   | A   | --     | --    | RNA    | SNP | 0.115 | 23 | 3  |
| --          | chr1 | 99648433  | T   | A   | --     | --    | IGR    | SNP | 0.176 | 28 | 6  |
| --          | chr1 | 99827991  | C   | A   | --     | --    | IGR    | SNP | 0.267 | 22 | 8  |
| --          | chr1 | 99836065  | T   | A   | --     | --    | IGR    | SNP | 0.359 | 25 | 14 |
| --          | chr1 | 100033050 | AAT | -   | --     | --    | IGR    | DEL | 0.136 | 19 | 3  |
| AGL         | chr1 | 100332302 | C   | G   | --     | --    | Intron | SNP | 0.368 | 12 | 7  |
| --          | chr1 | 100420196 | C   | T   | --     | --    | IGR    | SNP | 0.660 | 16 | 31 |
| --          | chr1 | 100811317 | T   | C   | --     | --    | IGR    | SNP | 0.220 | 32 | 9  |
| --          | chr1 | 101008864 | A   | G   | --     | --    | IGR    | SNP | 0.288 | 37 | 15 |
| --          | chr1 | 101040433 | T   | G   | --     | --    | IGR    | SNP | 0.250 | 21 | 7  |
| --          | chr1 | 101223449 | A   | T   | --     | --    | IGR    | SNP | 0.333 | 16 | 8  |
| --          | chr1 | 101227412 | C   | T   | --     | --    | IGR    | SNP | 0.192 | 21 | 5  |
| --          | chr1 | 101727614 | T   | C   | --     | --    | IGR    | SNP | 0.310 | 20 | 9  |
| --          | chr1 | 102106147 | G   | C   | --     | --    | IGR    | SNP | 0.195 | 33 | 8  |
| --          | chr1 | 102222442 | A   | G   | --     | --    | IGR    | SNP | 0.281 | 23 | 9  |
| OLFM3       | chr1 | 102301657 | T   | A   | --     | --    | Intron | SNP | 0.214 | 33 | 9  |
| --          | chr1 | 102490997 | A   | G   | --     | --    | IGR    | SNP | 0.568 | 16 | 21 |
| --          | chr1 | 102650788 | A   | T   | --     | --    | IGR    | SNP | 0.297 | 26 | 11 |
| --          | chr1 | 102723141 | C   | G   | --     | --    | IGR    | SNP | 0.262 | 45 | 16 |
| --          | chr1 | 102801847 | C   | G   | --     | --    | IGR    | SNP | 0.484 | 16 | 15 |
| --          | chr1 | 102802521 | G   | C   | --     | --    | IGR    | SNP | 0.310 | 20 | 9  |
| --          | chr1 | 102902967 | A   | T   | --     | --    | IGR    | SNP | 0.358 | 43 | 24 |
| --          | chr1 | 102964860 | G   | T   | --     | --    | IGR    | SNP | 0.370 | 29 | 17 |
| --          | chr1 | 103253192 | C   | A   | --     | --    | IGR    | SNP | 0.235 | 26 | 8  |
| COL11A1     | chr1 | 103571244 | A   | G   | --     | --    | Intron | SNP | 0.219 | 25 | 7  |
| --          | chr1 | 103588043 | C   | G   | --     | --    | IGR    | SNP | 0.314 | 24 | 11 |
| --          | chr1 | 103666279 | A   | G   | --     | --    | IGR    | SNP | 0.568 | 16 | 21 |
| --          | chr1 | 104050107 | A   | T   | --     | --    | IGR    | SNP | 0.421 | 22 | 16 |
| RNPC3       | chr1 | 104095296 | C   | T   | --     | --    | Intron | SNP | 0.386 | 27 | 17 |
| AMY2B       | chr1 | 104120204 | C   | T   | C1194T | V398V | Silent | SNP | 0.559 | 15 | 19 |
| --          | chr1 | 104308577 | C   | A   | --     | --    | IGR    | SNP | 0.643 | 10 | 18 |
| --          | chr1 | 104334664 | G   | C   | --     | --    | IGR    | SNP | 0.186 | 35 | 8  |
| --          | chr1 | 104367008 | C   | T   | --     | --    | IGR    | SNP | 0.629 | 13 | 22 |
| --          | chr1 | 104405304 | C   | A   | --     | --    | IGR    | SNP | 0.370 | 34 | 20 |
| --          | chr1 | 104504688 | A   | C   | --     | --    | IGR    | SNP | 0.441 | 19 | 15 |
| --          | chr1 | 104639471 | G   | A   | --     | --    | IGR    | SNP | 0.378 | 23 | 14 |
| --          | chr1 | 104667777 | G   | C   | --     | --    | IGR    | SNP | 0.125 | 28 | 4  |
| --          | chr1 | 104752403 | G   | T   | --     | --    | IGR    | SNP | 0.286 | 10 | 4  |
| --          | chr1 | 104880235 | T   | A   | --     | --    | IGR    | SNP | 0.652 | 8  | 15 |
| --          | chr1 | 104944172 | A   | T   | --     | --    | IGR    | SNP | 0.257 | 26 | 9  |
| --          | chr1 | 104949471 | G   | C   | --     | --    | IGR    | SNP | 0.179 | 23 | 5  |
| --          | chr1 | 105051450 | A   | G   | --     | --    | IGR    | SNP | 0.421 | 22 | 16 |
| --          | chr1 | 105072038 | C   | T   | --     | --    | IGR    | SNP | 0.111 | 24 | 3  |
| --          | chr1 | 105258110 | C   | T   | --     | --    | IGR    | SNP | 0.433 | 17 | 13 |
| --          | chr1 | 105301104 | T   | C   | --     | --    | IGR    | SNP | 0.417 | 14 | 10 |
| --          | chr1 | 105351357 | -   | GAT | --     | --    | IGR    | INS | 0.273 | 16 | 6  |
| --          | chr1 | 105396474 | T   | C   | --     | --    | IGR    | SNP | 0.222 | 35 | 10 |
| --          | chr1 | 105408741 | T   | G   | --     | --    | IGR    | SNP | 0.675 | 13 | 27 |
| --          | chr1 | 105570711 | C   | A   | --     | --    | IGR    | SNP | 0.116 | 38 | 5  |
| --          | chr1 | 105627318 | T   | G   | --     | --    | IGR    | SNP | 0.300 | 28 | 12 |
| --          | chr1 | 105663524 | C   | T   | --     | --    | IGR    | SNP | 0.636 | 8  | 14 |
| --          | chr1 | 105904421 | G   | A   | --     | --    | IGR    | SNP | 0.294 | 12 | 5  |
| --          | chr1 | 106056406 | C   | G   | --     | --    | IGR    | SNP | 0.769 | 9  | 30 |
| --          | chr1 | 106401844 | C   | A   | --     | --    | IGR    | SNP | 0.390 | 25 | 16 |
| --          | chr1 | 106509990 | G   | T   | --     | --    | IGR    | SNP | 0.308 | 27 | 12 |
| --          | chr1 | 106537413 | A   | G   | --     | --    | IGR    | SNP | 0.381 | 13 | 8  |
| --          | chr1 | 106771832 | C   | G   | --     | --    | IGR    | SNP | 0.800 | 4  | 16 |
| --          | chr1 | 106829884 | C   | T   | --     | --    | IGR    | SNP | 0.293 | 29 | 12 |
| --          | chr1 | 107196250 | A   | T   | --     | --    | IGR    | SNP | 0.875 | 4  | 28 |
| --          | chr1 | 107257511 | C   | A   | --     | --    | IGR    | SNP | 0.267 | 22 | 8  |
| --          | chr1 | 107358935 | T   | A   | --     | --    | IGR    | SNP | 0.520 | 12 | 13 |
| --          | chr1 | 107442727 | C   | A   | --     | --    | IGR    | SNP | 1.000 | 0  | 33 |
| NTNG1       | chr1 | 107954924 | A   | G   | --     | --    | Intron | SNP | 0.519 | 13 | 14 |
| VAV3        | chr1 | 108363331 | C   | A   | --     | --    | Intron | SNP | 0.789 | 4  | 15 |



|                 |      |           |     |      |    |    |         |     |       |    |    |
|-----------------|------|-----------|-----|------|----|----|---------|-----|-------|----|----|
| --              | chr1 | 108539663 | G   | A    | -- | -- | IGR     | SNP | 0.409 | 13 | 9  |
| --              | chr1 | 108596216 | A   | T    | -- | -- | IGR     | SNP | 0.189 | 30 | 7  |
| <i>FAM102B</i>  | chr1 | 109136851 | G   | A    | -- | -- | Intron  | SNP | 0.579 | 16 | 22 |
| <i>PSRC1</i>    | chr1 | 109821487 | G   | A    | -- | -- | 3'Flank | SNP | 0.438 | 27 | 21 |
| <i>SORT1</i>    | chr1 | 109876929 | C   | T    | -- | -- | Intron  | SNP | 0.189 | 30 | 7  |
| --              | chr1 | 110420191 | G   | T    | -- | -- | IGR     | SNP | 0.109 | 49 | 6  |
| --              | chr1 | 110498540 | G   | A    | -- | -- | IGR     | SNP | 0.542 | 11 | 13 |
| <i>AHCYL1</i>   | chr1 | 110528965 | G   | A    | -- | -- | Intron  | SNP | 0.227 | 17 | 5  |
| <i>SLC6A17</i>  | chr1 | 110704925 | A   | T    | -- | -- | Intron  | SNP | 0.327 | 37 | 18 |
| --              | chr1 | 111092295 | C   | G    | -- | -- | IGR     | SNP | 0.649 | 20 | 37 |
| --              | chr1 | 111951089 | T   | C    | -- | -- | IGR     | SNP | 0.360 | 16 | 9  |
| --              | chr1 | 112665565 | C   | G    | -- | -- | IGR     | SNP | 0.340 | 31 | 16 |
| --              | chr1 | 112677890 | G   | T    | -- | -- | IGR     | SNP | 0.341 | 27 | 14 |
| --              | chr1 | 112702424 | A   | G    | -- | -- | IGR     | SNP | 0.333 | 6  | 3  |
| --              | chr1 | 112711727 | GT  | -    | -- | -- | IGR     | DEL | 0.297 | 26 | 11 |
| --              | chr1 | 112747091 | G   | A    | -- | -- | IGR     | SNP | 0.190 | 17 | 4  |
| --              | chr1 | 112805855 | T   | C    | -- | -- | IGR     | SNP | 0.231 | 30 | 9  |
| <i>ST7L</i>     | chr1 | 113090210 | G   | T    | -- | -- | Intron  | SNP | 0.273 | 8  | 3  |
| <i>ST7L</i>     | chr1 | 113115970 | C   | A    | -- | -- | Intron  | SNP | 0.200 | 16 | 4  |
| <i>CAPZA1</i>   | chr1 | 113192535 | C   | T    | -- | -- | Intron  | SNP | 0.250 | 24 | 8  |
| --              | chr1 | 113382187 | T   | A    | -- | -- | IGR     | SNP | 0.676 | 12 | 25 |
| --              | chr1 | 114567275 | A   | T    | -- | -- | IGR     | SNP | 0.167 | 15 | 3  |
| <i>SYT6</i>     | chr1 | 114639793 | G   | A    | -- | -- | Intron  | SNP | 0.580 | 21 | 29 |
| --              | chr1 | 114870821 | G   | T    | -- | -- | IGR     | SNP | 0.148 | 23 | 4  |
| <i>TRIM33</i>   | chr1 | 115032410 | CTG | -    | -- | -- | Intron  | DEL | 0.293 | 29 | 12 |
| <i>DENND2C</i>  | chr1 | 115207449 | C   | T    | -- | -- | Intron  | SNP | 0.536 | 13 | 15 |
| --              | chr1 | 115585776 | C   | T    | -- | -- | IGR     | SNP | 0.290 | 22 | 9  |
| <i>TSPAN2</i>   | chr1 | 115622020 | T   | G    | -- | -- | Intron  | SNP | 0.684 | 12 | 26 |
| --              | chr1 | 115999008 | A   | C    | -- | -- | IGR     | SNP | 0.500 | 36 | 36 |
| --              | chr1 | 116030402 | G   | T    | -- | -- | IGR     | SNP | 0.250 | 24 | 8  |
| --              | chr1 | 116030599 | C   | G    | -- | -- | IGR     | SNP | 0.324 | 25 | 12 |
| --              | chr1 | 116034491 | G   | T    | -- | -- | IGR     | SNP | 0.326 | 31 | 15 |
| --              | chr1 | 116080785 | C   | G    | -- | -- | IGR     | SNP | 0.380 | 31 | 19 |
| --              | chr1 | 116097830 | C   | A    | -- | -- | IGR     | SNP | 0.280 | 18 | 7  |
| --              | chr1 | 116327250 | -   | AATC | -- | -- | IGR     | INS | 0.133 | 13 | 2  |
| --              | chr1 | 116503270 | C   | G    | -- | -- | IGR     | SNP | 0.691 | 17 | 38 |
| <i>MAB21L3</i>  | chr1 | 116663024 | TAC | -    | -- | -- | Intron  | DEL | 0.136 | 19 | 3  |
| <i>MIR320B1</i> | chr1 | 117213806 | G   | A    | -- | -- | 5'Flank | SNP | 0.150 | 17 | 3  |
| --              | chr1 | 117391455 | G   | T    | -- | -- | IGR     | SNP | 0.316 | 26 | 12 |
| --              | chr1 | 117391456 | G   | T    | -- | -- | IGR     | SNP | 0.316 | 26 | 12 |
| --              | chr1 | 117425971 | C   | A    | -- | -- | IGR     | SNP | 0.235 | 13 | 4  |
| --              | chr1 | 117842010 | C   | T    | -- | -- | IGR     | SNP | 0.111 | 32 | 4  |
| --              | chr1 | 117847217 | G   | T    | -- | -- | IGR     | SNP | 0.125 | 28 | 4  |
| --              | chr1 | 118121844 | C   | T    | -- | -- | IGR     | SNP | 0.255 | 41 | 14 |
| --              | chr1 | 118247972 | A   | G    | -- | -- | IGR     | SNP | 0.207 | 23 | 6  |
| --              | chr1 | 118263359 | A   | T    | -- | -- | IGR     | SNP | 0.326 | 29 | 14 |
| --              | chr1 | 119107576 | G   | A    | -- | -- | IGR     | SNP | 0.661 | 21 | 41 |
| <i>WARS2</i>    | chr1 | 119619719 | C   | A    | -- | -- | Intron  | SNP | 0.133 | 26 | 4  |
| --              | chr1 | 119953677 | G   | A    | -- | -- | IGR     | SNP | 0.220 | 32 | 9  |
| <i>HSD3B1</i>   | chr1 | 120050778 | A   | G    | -- | -- | Intron  | SNP | 0.170 | 39 | 8  |
| <i>HSD3B1</i>   | chr1 | 120054563 | C   | G    | -- | -- | Intron  | SNP | 0.364 | 35 | 20 |
| <i>HSD3BP4</i>  | chr1 | 120116118 | C   | G    | -- | -- | 3'Flank | SNP | 0.162 | 31 | 6  |
| <i>ZNF697</i>   | chr1 | 120162989 | C   | G    | -- | -- | 3'UTR   | SNP | 0.515 | 16 | 17 |
| <i>HMGCS2</i>   | chr1 | 120293980 | C   | T    | -- | -- | Intron  | SNP | 0.250 | 15 | 5  |
| --              | chr1 | 120318499 | T   | A    | -- | -- | IGR     | SNP | 0.184 | 31 | 7  |
| <i>NOTCH2</i>   | chr1 | 120540334 | C   | T    | -- | -- | Intron  | SNP | 0.231 | 83 | 25 |
| <i>NOTCH2</i>   | chr1 | 120558157 | C   | T    | -- | -- | Intron  | SNP | 0.110 | 81 | 10 |
| <i>NOTCH2</i>   | chr1 | 120564122 | G   | T    | -- | -- | Intron  | SNP | 0.135 | 64 | 10 |
| <i>NOTCH2</i>   | chr1 | 120593886 | C   | T    | -- | -- | Intron  | SNP | 0.222 | 21 | 6  |
| <i>NOTCH2</i>   | chr1 | 120593887 | A   | G    | -- | -- | Intron  | SNP | 0.240 | 19 | 6  |
| --              | chr1 | 120635412 | T   | C    | -- | -- | IGR     | SNP | 0.290 | 49 | 20 |
| --              | chr1 | 120675728 | C   | T    | -- | -- | IGR     | SNP | 0.300 | 42 | 18 |
| --              | chr1 | 120789885 | C   | T    | -- | -- | IGR     | SNP | 0.158 | 16 | 3  |
| <i>FAM72B</i>   | chr1 | 120847842 | G   | C    | -- | -- | Intron  | SNP | 0.393 | 17 | 11 |
| --              | chr1 | 121136430 | G   | C    | -- | -- | IGR     | SNP | 0.101 | 62 | 7  |
| --              | chr1 | 121139696 | -   | TTC  | -- | -- | IGR     | INS | 0.176 | 14 | 3  |
| --              | chr1 | 121189153 | -   | AG   | -- | -- | IGR     | INS | 0.103 | 26 | 3  |
| --              | chr1 | 121366768 | G   | T    | -- | -- | IGR     | SNP | 0.111 | 48 | 6  |
| --              | chr1 | 121377630 | T   | C    | -- | -- | IGR     | SNP | 0.102 | 44 | 5  |
| --              | chr1 | 121403241 | -   | CA   | -- | -- | IGR     | INS | 0.109 | 41 | 5  |
| --              | chr1 | 121404446 | T   | C    | -- | -- | IGR     | SNP | 0.167 | 20 | 4  |
| --              | chr1 | 121405473 | G   | T    | -- | -- | IGR     | SNP | 0.222 | 14 | 4  |
| --              | chr1 | 121412274 | T   | A    | -- | -- | IGR     | SNP | 0.385 | 8  | 5  |
| --              | chr1 | 121415320 | G   | T    | -- | -- | IGR     | SNP | 0.171 | 68 | 14 |
| --              | chr1 | 121425301 | A   | T    | -- | -- | IGR     | SNP | 0.179 | 23 | 5  |
| --              | chr1 | 121425465 | C   | G    | -- | -- | IGR     | SNP | 0.114 | 31 | 4  |
| --              | chr1 | 121429877 | A   | C    | -- | -- | IGR     | SNP | 0.261 | 17 | 6  |
| --              | chr1 | 121430827 | G   | T    | -- | -- | IGR     | SNP | 0.429 | 4  | 3  |
| --              | chr1 | 121437631 | T   | C    | -- | -- | IGR     | SNP | 0.120 | 22 | 3  |
| --              | chr1 | 121448931 | C   | T    | -- | -- | IGR     | SNP | 0.300 | 14 | 6  |

|              |      |           |    |    |        |       |                 |     |       |    |    |
|--------------|------|-----------|----|----|--------|-------|-----------------|-----|-------|----|----|
| --           | chr1 | 121457774 | A  | G  | --     | --    | IGR             | SNP | 0.556 | 4  | 5  |
| --           | chr1 | 121473366 | G  | T  | --     | --    | IGR             | SNP | 0.286 | 10 | 4  |
| --           | chr1 | 142570763 | -  | AT | --     | --    | IGR             | INS | 0.103 | 26 | 3  |
| --           | chr1 | 142570769 | G  | C  | --     | --    | IGR             | SNP | 0.111 | 24 | 3  |
| --           | chr1 | 142622410 | T  | C  | --     | --    | IGR             | SNP | 0.100 | 90 | 10 |
| --           | chr1 | 142677993 | C  | A  | --     | --    | IGR             | SNP | 0.133 | 26 | 4  |
| --           | chr1 | 142678012 | T  | C  | --     | --    | IGR             | SNP | 0.348 | 15 | 8  |
| --           | chr1 | 142678045 | T  | G  | --     | --    | IGR             | SNP | 0.350 | 13 | 7  |
| --           | chr1 | 142678074 | G  | A  | --     | --    | IGR             | SNP | 0.156 | 27 | 5  |
| --           | chr1 | 142709188 | C  | A  | --     | --    | IGR             | SNP | 0.300 | 21 | 9  |
| --           | chr1 | 142710553 | C  | G  | --     | --    | IGR             | SNP | 0.118 | 30 | 4  |
| --           | chr1 | 142710584 | C  | G  | --     | --    | IGR             | SNP | 0.154 | 22 | 4  |
| --           | chr1 | 142711982 | G  | C  | --     | --    | IGR             | SNP | 0.167 | 20 | 4  |
| --           | chr1 | 142721001 | GA | -  | --     | --    | IGR             | DEL | 0.105 | 17 | 2  |
| --           | chr1 | 142728498 | C  | A  | --     | --    | IGR             | SNP | 0.179 | 23 | 5  |
| --           | chr1 | 142788424 | G  | T  | --     | --    | IGR             | SNP | 0.185 | 22 | 5  |
| --           | chr1 | 142788436 | T  | A  | --     | --    | IGR             | SNP | 0.375 | 10 | 6  |
| --           | chr1 | 142825368 | T  | C  | --     | --    | IGR             | SNP | 0.231 | 20 | 6  |
| --           | chr1 | 142828272 | T  | G  | --     | --    | IGR             | SNP | 0.103 | 52 | 6  |
| --           | chr1 | 142829417 | A  | G  | --     | --    | IGR             | SNP | 0.143 | 30 | 5  |
| --           | chr1 | 142833926 | C  | T  | --     | --    | IGR             | SNP | 0.208 | 19 | 5  |
| --           | chr1 | 142841659 | T  | C  | --     | --    | IGR             | SNP | 0.500 | 3  | 3  |
| --           | chr1 | 142866749 | C  | A  | --     | --    | IGR             | SNP | 0.170 | 44 | 9  |
| --           | chr1 | 142871928 | A  | C  | --     | --    | IGR             | SNP | 0.253 | 56 | 19 |
| --           | chr1 | 142880833 | A  | G  | --     | --    | IGR             | SNP | 0.115 | 23 | 3  |
| --           | chr1 | 142884187 | G  | A  | --     | --    | IGR             | SNP | 0.132 | 33 | 5  |
| --           | chr1 | 142916235 | A  | G  | --     | --    | IGR             | SNP | 0.182 | 27 | 6  |
| --           | chr1 | 142921649 | A  | G  | --     | --    | IGR             | SNP | 0.364 | 7  | 4  |
| --           | chr1 | 142943905 | A  | C  | --     | --    | IGR             | SNP | 0.200 | 20 | 5  |
| --           | chr1 | 142948432 | G  | A  | --     | --    | IGR             | SNP | 0.250 | 15 | 5  |
| --           | chr1 | 143121173 | C  | T  | --     | --    | IGR             | SNP | 0.113 | 63 | 8  |
| --           | chr1 | 143130184 | A  | T  | --     | --    | IGR             | SNP | 0.185 | 22 | 5  |
| --           | chr1 | 143131796 | G  | C  | --     | --    | IGR             | SNP | 0.108 | 58 | 7  |
| --           | chr1 | 143176565 | -  | AT | --     | --    | IGR             | INS | 0.224 | 38 | 11 |
| --           | chr1 | 143212998 | G  | A  | --     | --    | IGR             | SNP | 0.130 | 40 | 6  |
| --           | chr1 | 143216453 | A  | G  | --     | --    | IGR             | SNP | 0.104 | 43 | 5  |
| --           | chr1 | 143233932 | C  | G  | --     | --    | IGR             | SNP | 0.130 | 40 | 6  |
| --           | chr1 | 143243907 | G  | A  | --     | --    | IGR             | SNP | 0.125 | 56 | 8  |
| --           | chr1 | 143366403 | A  | G  | --     | --    | IGR             | SNP | 0.192 | 21 | 5  |
| --           | chr1 | 143366664 | C  | T  | --     | --    | IGR             | SNP | 0.189 | 30 | 7  |
| --           | chr1 | 143376479 | G  | T  | --     | --    | IGR             | SNP | 0.154 | 22 | 4  |
| --           | chr1 | 143388467 | A  | C  | --     | --    | IGR             | SNP | 0.375 | 10 | 6  |
| --           | chr1 | 143407042 | C  | T  | --     | --    | IGR             | SNP | 0.140 | 37 | 6  |
| --           | chr1 | 143411910 | G  | T  | --     | --    | IGR             | SNP | 0.152 | 39 | 7  |
| --           | chr1 | 143417383 | -  | GA | --     | --    | IGR             | INS | 0.123 | 56 | 8  |
| --           | chr1 | 143419044 | C  | T  | --     | --    | IGR             | SNP | 0.162 | 31 | 6  |
| --           | chr1 | 143432120 | G  | A  | --     | --    | IGR             | SNP | 0.333 | 16 | 8  |
| --           | chr1 | 143432843 | G  | T  | --     | --    | IGR             | SNP | 0.121 | 51 | 7  |
| --           | chr1 | 143448281 | G  | T  | --     | --    | IGR             | SNP | 0.130 | 40 | 6  |
| --           | chr1 | 143448650 | C  | G  | --     | --    | IGR             | SNP | 0.189 | 60 | 14 |
| --           | chr1 | 143451271 | C  | T  | --     | --    | IGR             | SNP | 0.122 | 43 | 6  |
| --           | chr1 | 143452126 | G  | A  | --     | --    | IGR             | SNP | 0.239 | 35 | 11 |
| --           | chr1 | 143460381 | A  | G  | --     | --    | IGR             | SNP | 0.267 | 22 | 8  |
| --           | chr1 | 143464821 | C  | T  | --     | --    | IGR             | SNP | 0.225 | 31 | 9  |
| --           | chr1 | 143473769 | C  | T  | --     | --    | IGR             | SNP | 0.444 | 5  | 4  |
| --           | chr1 | 143482658 | T  | A  | --     | --    | IGR             | SNP | 0.121 | 29 | 4  |
| --           | chr1 | 143525410 | G  | A  | --     | --    | IGR             | SNP | 0.250 | 9  | 3  |
| FLJ39739,LO( | chr1 | 143743963 | T  | G  | --     | --    | RNA             | SNP | 0.184 | 31 | 7  |
| --           | chr1 | 143875738 | AG | -  | --     | --    | IGR             | DEL | 0.188 | 13 | 3  |
| --           | chr1 | 143879463 | G  | T  | --     | --    | IGR             | SNP | 0.243 | 56 | 18 |
| --           | chr1 | 143879464 | A  | T  | --     | --    | IGR             | SNP | 0.240 | 57 | 18 |
| SRGAP2P2     | chr1 | 144001359 | A  | G  | --     | --    | RNA             | SNP | 0.308 | 18 | 8  |
| SRGAP2P2     | chr1 | 144042902 | A  | C  | --     | --    | RNA             | SNP | 0.333 | 8  | 4  |
| --           | chr1 | 144197712 | C  | G  | --     | --    | IGR             | SNP | 0.130 | 20 | 3  |
| --           | chr1 | 144466381 | -  | TA | --     | --    | IGR             | INS | 0.158 | 16 | 3  |
| --           | chr1 | 144569527 | A  | C  | --     | --    | IGR             | SNP | 0.154 | 22 | 4  |
| --           | chr1 | 144589208 | C  | G  | --     | --    | IGR             | SNP | 0.161 | 52 | 10 |
| PFN1P2       | chr1 | 144609941 | T  | C  | --     | --    | 3'Flank         | SNP | 0.400 | 3  | 2  |
| NBPF9        | chr1 | 144620502 | T  | G  | --     | --    | Intron          | SNP | 0.125 | 21 | 3  |
| NBPF9        | chr1 | 144811149 | A  | G  | --     | --    | Intron          | SNP | 0.192 | 21 | 5  |
| NBPF9        | chr1 | 144814740 | G  | A  | G1150A | A384T | Missense_mutati | SNP | 0.100 | 27 | 3  |
| PDE4DIP      | chr1 | 144920683 | G  | A  | --     | --    | Intron          | SNP | 0.275 | 29 | 11 |
| NBPF10       | chr1 | 145360885 | A  | C  | --     | --    | Intron          | SNP | 0.156 | 38 | 7  |
| NBPF10       | chr1 | 145365658 | C  | G  | --     | --    | Intron          | SNP | 0.167 | 25 | 5  |
| GNRHR2       | chr1 | 145514525 | A  | G  | --     | --    | RNA             | SNP | 0.115 | 23 | 3  |
| --           | chr1 | 146380010 | T  | C  | --     | --    | IGR             | SNP | 0.250 | 18 | 6  |
| --           | chr1 | 146380040 | -  | GA | --     | --    | IGR             | INS | 0.150 | 17 | 3  |
| --           | chr1 | 146398324 | C  | T  | --     | --    | IGR             | SNP | 0.167 | 20 | 4  |
| CHD1L        | chr1 | 146749916 | G  | T  | --     | --    | Intron          | SNP | 0.154 | 22 | 4  |
| --           | chr1 | 146800712 | G  | C  | --     | --    | IGR             | SNP | 0.286 | 35 | 14 |

|             |      |           |             |    |       |       |                 |       |       |     |    |
|-------------|------|-----------|-------------|----|-------|-------|-----------------|-------|-------|-----|----|
| LOC10028921 | chr1 | 146922153 | A           | T  | --    | --    | RNA             | SNP   | 0.203 | 47  | 12 |
| --          | chr1 | 147695303 | C           | A  | --    | --    | IGR             | SNP   | 0.214 | 33  | 9  |
| --          | chr1 | 147752512 | G           | A  | --    | --    | IGR             | SNP   | 0.129 | 27  | 4  |
| NBPF14      | chr1 | 148006039 | G           | T  | --    | --    | Intron          | SNP   | 0.140 | 43  | 7  |
| NBPF14      | chr1 | 148014331 | A           | G  | --    | --    | Intron          | SNP   | 0.481 | 14  | 13 |
| --          | chr1 | 148220715 | T           | C  | --    | --    | IGR             | SNP   | 0.182 | 27  | 6  |
| --          | chr1 | 148344068 | C           | T  | --    | --    | IGR             | SNP   | 0.107 | 25  | 3  |
| --          | chr1 | 148548582 | C           | G  | --    | --    | IGR             | SNP   | 0.208 | 141 | 37 |
| --          | chr1 | 148602024 | G           | C  | --    | --    | IGR             | SNP   | 0.171 | 29  | 6  |
| --          | chr1 | 148670123 | G           | A  | --    | --    | IGR             | SNP   | 0.111 | 40  | 5  |
| --          | chr1 | 148670132 | C           | G  | --    | --    | IGR             | SNP   | 0.125 | 35  | 5  |
| --          | chr1 | 148670173 | A           | T  | --    | --    | IGR             | SNP   | 0.185 | 22  | 5  |
| --          | chr1 | 148679113 | G           | A  | --    | --    | IGR             | SNP   | 0.244 | 34  | 11 |
| --          | chr1 | 148682138 | TA          | -  | --    | --    | IGR             | DEL   | 0.114 | 31  | 4  |
| --          | chr1 | 148760662 | GA          | -  | --    | --    | IGR             | DEL   | 0.125 | 21  | 3  |
| --          | chr1 | 149015113 | C           | G  | --    | --    | IGR             | SNP   | 0.174 | 19  | 4  |
| --          | chr1 | 149038928 | G           | T  | --    | --    | IGR             | SNP   | 0.283 | 43  | 17 |
| --          | chr1 | 149044599 | C           | T  | --    | --    | IGR             | SNP   | 0.174 | 38  | 8  |
| --          | chr1 | 149086304 | C           | A  | --    | --    | IGR             | SNP   | 0.192 | 42  | 10 |
| --          | chr1 | 149128852 | T           | G  | --    | --    | IGR             | SNP   | 0.286 | 10  | 4  |
| --          | chr1 | 149136478 | G           | A  | --    | --    | IGR             | SNP   | 0.152 | 28  | 5  |
| --          | chr1 | 149161467 | C           | A  | --    | --    | IGR             | SNP   | 0.190 | 51  | 12 |
| --          | chr1 | 149161468 | T           | C  | --    | --    | IGR             | SNP   | 0.200 | 52  | 13 |
| --          | chr1 | 149702244 | C           | T  | --    | --    | IGR             | SNP   | 0.304 | 39  | 17 |
| FCGR1A      | chr1 | 149761619 | C           | T  | C569T | P190L | Missense_mutati | SNP   | 0.244 | 31  | 10 |
| HIST2H2BF   | chr1 | 149769543 | T           | A  | --    | --    | Intron          | SNP   | 0.214 | 33  | 9  |
| VPS45       | chr1 | 150093004 | G           | T  | --    | --    | Intron          | SNP   | 0.160 | 21  | 4  |
| --          | chr1 | 150287291 | G           | T  | --    | --    | IGR             | SNP   | 0.125 | 21  | 3  |
| PRPF3       | chr1 | 150296248 | G           | T  | --    | --    | Intron          | SNP   | 0.333 | 6   | 3  |
| RPRD2       | chr1 | 150434544 | TGAAGTCAG(- | -- | --    | --    | Intron          | DEL   | 0.250 | 24  | 8  |
| --          | chr1 | 150479995 | A           | T  | --    | --    | IGR             | SNP   | 0.226 | 48  | 14 |
| --          | chr1 | 150492290 | C           | T  | --    | --    | IGR             | SNP   | 0.206 | 27  | 7  |
| --          | chr1 | 150505930 | G           | T  | --    | --    | IGR             | SNP   | 0.138 | 25  | 4  |
| CTSK        | chr1 | 150771568 | G           | C  | --    | --    | Intron          | SNP   | 0.239 | 51  | 16 |
| --          | chr1 | 150864962 | C           | G  | --    | --    | IGR             | SNP   | 0.690 | 9   | 20 |
| --          | chr1 | 150865325 | C           | G  | --    | --    | IGR             | SNP   | 0.714 | 16  | 40 |
| --          | chr1 | 150865582 | C           | G  | --    | --    | IGR             | SNP   | 0.755 | 13  | 40 |
| --          | chr1 | 150865733 | C           | T  | --    | --    | IGR             | SNP   | 0.513 | 19  | 20 |
| --          | chr1 | 150865776 | C           | G  | --    | --    | IGR             | SNP   | 0.545 | 20  | 24 |
| PRUNE       | chr1 | 151007925 | C           | T  | --    | --    | 3'UTR           | SNP   | 0.188 | 56  | 13 |
| PIP5K1A     | chr1 | 151190669 | G           | A  | --    | --    | Intron          | SNP   | 0.225 | 55  | 16 |
| --          | chr1 | 151303778 | GAC         | -  | --    | --    | DEL             | 0.148 | 23    | 4   |    |
| --          | chr1 | 151449558 | C           | G  | --    | --    | IGR             | SNP   | 0.197 | 57  | 14 |
| --          | chr1 | 151572520 | C           | G  | --    | --    | IGR             | SNP   | 0.148 | 23  | 4  |
| --          | chr1 | 151572750 | TG          | -  | --    | --    | IGR             | DEL   | 0.235 | 13  | 4  |
| SNX27       | chr1 | 151635620 | C           | T  | --    | --    | Intron          | SNP   | 0.487 | 20  | 19 |
| --          | chr1 | 151831033 | C           | G  | --    | --    | IGR             | SNP   | 0.267 | 55  | 20 |
| --          | chr1 | 151946834 | G           | A  | --    | --    | IGR             | SNP   | 0.218 | 43  | 12 |
| --          | chr1 | 152105521 | CA          | -  | --    | --    | IGR             | DEL   | 0.295 | 31  | 13 |
| --          | chr1 | 152112254 | G           | T  | --    | --    | IGR             | SNP   | 0.347 | 32  | 17 |
| --          | chr1 | 152134751 | C           | G  | --    | --    | IGR             | SNP   | 0.310 | 29  | 13 |
| --          | chr1 | 152235596 | G           | A  | --    | --    | IGR             | SNP   | 0.103 | 26  | 3  |
| --          | chr1 | 152399872 | G           | T  | --    | --    | IGR             | SNP   | 0.196 | 37  | 9  |
| --          | chr1 | 152688297 | T           | A  | --    | --    | IGR             | SNP   | 0.313 | 44  | 20 |
| --          | chr1 | 152690767 | C           | G  | --    | --    | IGR             | SNP   | 0.492 | 33  | 32 |
| --          | chr1 | 152702474 | A           | C  | --    | --    | IGR             | SNP   | 0.522 | 11  | 12 |
| --          | chr1 | 152714353 | T           | C  | --    | --    | IGR             | SNP   | 0.200 | 56  | 14 |
| --          | chr1 | 152936559 | G           | A  | --    | --    | IGR             | SNP   | 0.152 | 28  | 5  |
| --          | chr1 | 152936560 | A           | G  | --    | --    | IGR             | SNP   | 0.147 | 29  | 5  |
| --          | chr1 | 152952306 | T           | C  | --    | --    | IGR             | SNP   | 0.182 | 36  | 8  |
| SPRR2D      | chr1 | 153011692 | C           | G  | --    | --    | 3'Flank         | SNP   | 0.429 | 28  | 21 |
| --          | chr1 | 153054919 | G           | A  | --    | --    | IGR             | SNP   | 0.211 | 45  | 12 |
| --          | chr1 | 153152749 | T           | A  | --    | --    | IGR             | SNP   | 0.203 | 51  | 13 |
| --          | chr1 | 153203920 | G           | A  | --    | --    | IGR             | SNP   | 0.179 | 46  | 10 |
| --          | chr1 | 153216128 | G           | A  | --    | --    | IGR             | SNP   | 0.154 | 66  | 12 |
| --          | chr1 | 153364895 | G           | A  | --    | --    | IGR             | SNP   | 0.235 | 52  | 16 |
| --          | chr1 | 153381611 | C           | T  | --    | --    | IGR             | SNP   | 0.156 | 27  | 5  |
| --          | chr1 | 153381626 | G           | A  | --    | --    | IGR             | SNP   | 0.143 | 30  | 5  |
| --          | chr1 | 153427630 | A           | G  | --    | --    | IGR             | SNP   | 0.294 | 48  | 20 |
| --          | chr1 | 153565231 | G           | A  | --    | --    | IGR             | SNP   | 0.279 | 44  | 17 |
| NPR1        | chr1 | 153657330 | C           | G  | --    | --    | Intron          | SNP   | 0.725 | 14  | 37 |
| GATAD2B     | chr1 | 153831124 | C           | T  | --    | --    | Intron          | SNP   | 0.260 | 57  | 20 |
| NUP210L     | chr1 | 154014454 | A           | T  | --    | --    | Intron          | SNP   | 0.155 | 49  | 9  |
| IL6R        | chr1 | 154403089 | A           | G  | --    | --    | Intron          | SNP   | 0.279 | 49  | 19 |
| --          | chr1 | 155089725 | C           | A  | --    | --    | IGR             | SNP   | 0.360 | 16  | 9  |
| EFNA1       | chr1 | 155099881 | G           | C  | --    | --    | 5'Flank         | SNP   | 0.260 | 37  | 13 |
| PKLR        | chr1 | 155265900 | G           | A  | --    | --    | Intron          | SNP   | 0.494 | 42  | 41 |
| ASH1L       | chr1 | 155466636 | T           | G  | --    | --    | Intron          | SNP   | 0.152 | 39  | 7  |
| --          | chr1 | 155607906 | A           | T  | --    | --    | IGR             | SNP   | 0.214 | 11  | 3  |
| YY1AP1      | chr1 | 155649008 | C           | G  | --    | --    | 5'UTR           | SNP   | 0.221 | 53  | 15 |

|           |      |           |       |       |    |    |         |     |       |    |    |
|-----------|------|-----------|-------|-------|----|----|---------|-----|-------|----|----|
| ARHGEF2   | chr1 | 155919322 | G     | C     | -- | -- | Intron  | SNP | 0.194 | 25 | 6  |
| RAB25     | chr1 | 156031975 | CAT   | -     | -- | -- | Intron  | DEL | 0.133 | 72 | 11 |
| MEX3A     | chr1 | 156048236 | C     | G     | -- | -- | Intron  | SNP | 0.226 | 48 | 14 |
| --        | chr1 | 156151523 | GT    | -     | -- | -- | IGR     | DEL | 0.180 | 50 | 11 |
| --        | chr1 | 156337804 | C     | A     | -- | -- | IGR     | SNP | 0.597 | 25 | 37 |
| --        | chr1 | 156425500 | C     | A     | -- | -- | IGR     | SNP | 0.246 | 43 | 14 |
| --        | chr1 | 156584711 | C     | T     | -- | -- | IGR     | SNP | 0.230 | 47 | 14 |
| --        | chr1 | 156585825 | C     | G     | -- | -- | IGR     | SNP | 0.679 | 18 | 38 |
| LRRC71    | chr1 | 156901632 | TTGAA | -     | -- | -- | Intron  | DEL | 0.426 | 39 | 29 |
| ARHGEF11  | chr1 | 157011987 | A     | C     | -- | -- | Intron  | SNP | 0.169 | 59 | 12 |
| --        | chr1 | 157110647 | T     | A     | -- | -- | IGR     | SNP | 0.246 | 43 | 14 |
| --        | chr1 | 157110648 | G     | T     | -- | -- | IGR     | SNP | 0.254 | 44 | 15 |
| --        | chr1 | 157130090 | C     | A     | -- | -- | IGR     | SNP | 0.211 | 15 | 4  |
| --        | chr1 | 157231073 | C     | T     | -- | -- | IGR     | SNP | 0.254 | 44 | 15 |
| --        | chr1 | 157680374 | GAT   | -     | -- | -- | IGR     | DEL | 0.111 | 40 | 5  |
| --        | chr1 | 157680389 | C     | A     | -- | -- | IGR     | SNP | 0.115 | 46 | 6  |
| FCRL2     | chr1 | 157723335 | G     | T     | -- | -- | Intron  | SNP | 0.644 | 16 | 29 |
| --        | chr1 | 157820707 | G     | T     | -- | -- | IGR     | SNP | 0.270 | 54 | 20 |
| --        | chr1 | 157842925 | C     | T     | -- | -- | IGR     | SNP | 0.222 | 35 | 10 |
| --        | chr1 | 157911702 | G     | C     | -- | -- | IGR     | SNP | 0.140 | 49 | 8  |
| --        | chr1 | 157953914 | T     | G     | -- | -- | IGR     | SNP | 0.212 | 41 | 11 |
| --        | chr1 | 158089000 | C     | G     | -- | -- | IGR     | SNP | 0.769 | 9  | 30 |
| LOC646268 | chr1 | 158103327 | TA    | -     | -- | -- | RNA     | DEL | 0.143 | 12 | 2  |
| --        | chr1 | 158146501 | C     | G     | -- | -- | IGR     | SNP | 0.184 | 31 | 7  |
| --        | chr1 | 158177612 | G     | C     | -- | -- | IGR     | SNP | 0.184 | 40 | 9  |
| --        | chr1 | 158292393 | T     | A     | -- | -- | IGR     | SNP | 0.264 | 39 | 14 |
| CD1E      | chr1 | 158327917 | C     | G     | -- | -- | 3'Flank | SNP | 0.200 | 36 | 9  |
| --        | chr1 | 158331618 | -     | GTTGT | -- | -- | IGR     | INS | 0.111 | 16 | 2  |
| --        | chr1 | 158399069 | C     | G     | -- | -- | IGR     | SNP | 0.389 | 11 | 7  |
| --        | chr1 | 158854134 | A     | G     | -- | -- | IGR     | SNP | 0.108 | 33 | 4  |
| --        | chr1 | 159566346 | C     | T     | -- | -- | IGR     | SNP | 0.265 | 36 | 13 |
| --        | chr1 | 159792408 | C     | T     | -- | -- | IGR     | SNP | 0.200 | 64 | 16 |
| KCNJ10    | chr1 | 160039416 | G     | C     | -- | -- | Intron  | SNP | 0.100 | 45 | 5  |
| COPA      | chr1 | 160258231 | ATG   | -     | -- | -- | 3'Flank | DEL | 0.118 | 15 | 2  |
| CD84      | chr1 | 160542292 | C     | T     | -- | -- | Intron  | SNP | 0.230 | 47 | 14 |
| SLAMF1    | chr1 | 160611395 | A     | C     | -- | -- | Intron  | SNP | 0.250 | 30 | 10 |
| LY9       | chr1 | 160778981 | TTC   | -     | -- | -- | Intron  | DEL | 0.189 | 30 | 7  |
| --        | chr1 | 161223489 | C     | T     | -- | -- | IGR     | SNP | 0.298 | 40 | 17 |
| --        | chr1 | 161223859 | C     | G     | -- | -- | IGR     | SNP | 0.231 | 50 | 15 |
| --        | chr1 | 161223889 | C     | G     | -- | -- | IGR     | SNP | 0.197 | 53 | 13 |
| --        | chr1 | 161414068 | C     | T     | -- | -- | IGR     | SNP | 0.361 | 23 | 13 |
| --        | chr1 | 161535114 | G     | T     | -- | -- | IGR     | SNP | 0.121 | 51 | 7  |
| --        | chr1 | 161536879 | C     | G     | -- | -- | IGR     | SNP | 0.821 | 7  | 32 |
| ATF6      | chr1 | 161900514 | A     | G     | -- | -- | Intron  | SNP | 0.250 | 36 | 12 |
| ATF6      | chr1 | 161929334 | C     | A     | -- | -- | 3'UTR   | SNP | 0.541 | 17 | 20 |
| NOS1AP    | chr1 | 162245030 | T     | A     | -- | -- | Intron  | SNP | 0.250 | 33 | 11 |
| NOS1AP    | chr1 | 162259057 | -     | TC    | -- | -- | Intron  | INS | 0.167 | 25 | 5  |
| SH2D1B    | chr1 | 162374168 | A     | G     | -- | -- | Intron  | SNP | 0.556 | 16 | 20 |
| UAP1      | chr1 | 162552936 | C     | T     | -- | -- | Intron  | SNP | 0.154 | 22 | 4  |
| --        | chr1 | 162880861 | A     | C     | -- | -- | IGR     | SNP | 0.679 | 9  | 19 |
| --        | chr1 | 162883948 | C     | A     | -- | -- | IGR     | SNP | 0.164 | 51 | 10 |
| --        | chr1 | 162977359 | T     | A     | -- | -- | IGR     | SNP | 0.114 | 31 | 4  |
| --        | chr1 | 163205466 | C     | T     | -- | -- | IGR     | SNP | 0.306 | 34 | 15 |
| --        | chr1 | 163471437 | C     | G     | -- | -- | IGR     | SNP | 0.625 | 18 | 30 |
| --        | chr1 | 163615238 | A     | T     | -- | -- | IGR     | SNP | 0.235 | 13 | 4  |
| --        | chr1 | 163647074 | A     | G     | -- | -- | IGR     | SNP | 0.267 | 44 | 16 |
| --        | chr1 | 163647091 | T     | G     | -- | -- | IGR     | SNP | 0.263 | 42 | 15 |
| --        | chr1 | 163740926 | A     | T     | -- | -- | IGR     | SNP | 0.432 | 42 | 32 |
| --        | chr1 | 163890012 | A     | G     | -- | -- | IGR     | SNP | 0.228 | 44 | 13 |
| --        | chr1 | 163925966 | A     | T     | -- | -- | IGR     | SNP | 0.129 | 27 | 4  |
| --        | chr1 | 164020424 | C     | A     | -- | -- | IGR     | SNP | 0.227 | 51 | 15 |
| --        | chr1 | 164256923 | -     | TG    | -- | -- | IGR     | INS | 0.125 | 14 | 2  |
| --        | chr1 | 164486698 | C     | T     | -- | -- | IGR     | SNP | 0.243 | 56 | 18 |
| --        | chr1 | 164500522 | T     | G     | -- | -- | IGR     | SNP | 0.351 | 37 | 20 |
| --        | chr1 | 164507676 | G     | T     | -- | -- | IGR     | SNP | 0.226 | 48 | 14 |
| PBX1      | chr1 | 164821110 | C     | A     | -- | -- | 3'Flank | SNP | 0.191 | 38 | 9  |
| --        | chr1 | 164847642 | T     | G     | -- | -- | IGR     | SNP | 0.319 | 32 | 15 |
| --        | chr1 | 164865833 | G     | A     | -- | -- | IGR     | SNP | 0.143 | 24 | 4  |
| --        | chr1 | 165055041 | G     | C     | -- | -- | IGR     | SNP | 0.121 | 29 | 4  |
| --        | chr1 | 165328980 | C     | T     | -- | -- | IGR     | SNP | 0.148 | 23 | 4  |
| --        | chr1 | 165423651 | G     | C     | -- | -- | IGR     | SNP | 0.485 | 35 | 33 |
| LOC400794 | chr1 | 165464240 | G     | A     | -- | -- | RNA     | SNP | 0.177 | 51 | 11 |
| --        | chr1 | 165757982 | G     | C     | -- | -- | IGR     | SNP | 0.109 | 49 | 6  |
| --        | chr1 | 166196507 | AC    | -     | -- | -- | IGR     | DEL | 0.118 | 15 | 2  |
| --        | chr1 | 166269840 | TA    | -     | -- | -- | IGR     | DEL | 0.164 | 51 | 10 |
| --        | chr1 | 166451783 | G     | A     | -- | -- | IGR     | SNP | 0.138 | 25 | 4  |
| POGK      | chr1 | 166811518 | G     | A     | -- | -- | Intron  | SNP | 0.177 | 65 | 14 |
| MAEL      | chr1 | 166972545 | C     | G     | -- | -- | Intron  | SNP | 0.646 | 17 | 31 |
| MAEL      | chr1 | 166972623 | C     | T     | -- | -- | Intron  | SNP | 0.525 | 19 | 21 |
| MAEL      | chr1 | 166972629 | C     | G     | -- | -- | Intron  | SNP | 0.535 | 20 | 23 |

|                    |      |           |      |    |        |        |                 |     |       |    |    |
|--------------------|------|-----------|------|----|--------|--------|-----------------|-----|-------|----|----|
| <i>POU2F1</i>      | chr1 | 167325419 | C    | T  | --     | --     | Intron          | SNP | 0.138 | 25 | 4  |
| --                 | chr1 | 167550157 | C    | A  | --     | --     | IGR             | SNP | 0.185 | 53 | 12 |
| <i>ADCY10</i>      | chr1 | 167820434 | G    | A  | --     | --     | Intron          | SNP | 0.162 | 31 | 6  |
| <i>BRP44</i>       | chr1 | 167894783 | G    | T  | --     | --     | Intron          | SNP | 0.538 | 6  | 7  |
| <i>DCAF6</i>       | chr1 | 167957352 | GATA | -  | --     | --     | Intron          | DEL | 0.322 | 40 | 19 |
| --                 | chr1 | 168764445 | C    | A  | --     | --     | IGR             | SNP | 0.190 | 17 | 4  |
| <i>NME7</i>        | chr1 | 169123120 | A    | T  | --     | --     | Intron          | SNP | 0.179 | 32 | 7  |
| <i>NME7</i>        | chr1 | 169225803 | G    | A  | --     | --     | Intron          | SNP | 0.175 | 33 | 7  |
| <i>C1orf114</i>    | chr1 | 169373299 | G    | C  | --     | --     | Intron          | SNP | 0.227 | 17 | 5  |
| --                 | chr1 | 169459707 | T    | G  | --     | --     | IGR             | SNP | 0.195 | 33 | 8  |
| <i>F5</i>          | chr1 | 169513544 | C    | A  | G1965T | M655I  | Missense_mutati | SNP | 0.204 | 39 | 10 |
| --                 | chr1 | 169603092 | A    | C  | --     | --     | IGR             | SNP | 0.242 | 50 | 16 |
| --                 | chr1 | 169619219 | T    | A  | --     | --     | IGR             | SNP | 0.108 | 66 | 8  |
| --                 | chr1 | 169624738 | C    | A  | --     | --     | IGR             | SNP | 0.167 | 40 | 8  |
| <i>METTL11B</i>    | chr1 | 170121513 | C    | G  | --     | --     | Intron          | SNP | 0.309 | 38 | 17 |
| --                 | chr1 | 170235829 | GTA  | -  | --     | --     | IGR             | DEL | 0.118 | 15 | 2  |
| --                 | chr1 | 170288934 | T    | A  | --     | --     | IGR             | SNP | 0.218 | 43 | 12 |
| --                 | chr1 | 170364522 | C    | T  | --     | --     | IGR             | SNP | 0.255 | 38 | 13 |
| --                 | chr1 | 170414377 | C    | T  | --     | --     | IGR             | SNP | 0.667 | 17 | 34 |
| --                 | chr1 | 170466302 | GCA  | -  | --     | --     | IGR             | DEL | 0.111 | 56 | 7  |
| --                 | chr1 | 170562499 | C    | A  | --     | --     | IGR             | SNP | 0.673 | 17 | 35 |
| --                 | chr1 | 170717152 | G    | A  | --     | --     | IGR             | SNP | 0.254 | 50 | 17 |
| --                 | chr1 | 170737180 | G    | A  | --     | --     | IGR             | SNP | 0.368 | 36 | 21 |
| --                 | chr1 | 170796917 | C    | G  | --     | --     | IGR             | SNP | 0.109 | 57 | 7  |
| --                 | chr1 | 170853548 | C    | A  | --     | --     | IGR             | SNP | 0.246 | 49 | 16 |
| <i>C1orf129</i>    | chr1 | 170955673 | G    | C  | --     | --     | Intron          | SNP | 0.100 | 54 | 6  |
| --                 | chr1 | 171035092 | C    | A  | --     | --     | IGR             | SNP | 0.277 | 34 | 13 |
| <i>FMO3</i>        | chr1 | 171059426 | A    | C  | --     | --     | 5'Flank         | SNP | 0.220 | 32 | 9  |
| --                 | chr1 | 171133040 | C    | T  | --     | --     | IGR             | SNP | 0.306 | 34 | 15 |
| --                 | chr1 | 171183973 | C    | T  | --     | --     | IGR             | SNP | 0.242 | 50 | 16 |
| <i>FMO1</i>        | chr1 | 171245439 | G    | T  | --     | --     | Intron          | SNP | 0.386 | 35 | 22 |
| --                 | chr1 | 171581338 | C    | A  | --     | --     | IGR             | SNP | 0.245 | 37 | 12 |
| --                 | chr1 | 171647935 | G    | A  | --     | --     | IGR             | SNP | 0.762 | 10 | 32 |
| <i>DNM3</i>        | chr1 | 172024558 | TAC  | -  | --     | --     | Intron          | DEL | 0.121 | 29 | 4  |
| <i>DNM3</i>        | chr1 | 172047599 | C    | T  | --     | --     | Intron          | SNP | 0.286 | 20 | 8  |
| <i>DNM3</i>        | chr1 | 172167650 | C    | G  | --     | --     | Intron          | SNP | 0.188 | 39 | 9  |
| --                 | chr1 | 172384660 | G    | T  | --     | --     | IGR             | SNP | 0.160 | 21 | 4  |
| <i>C1orf105</i>    | chr1 | 172420296 | C    | G  | --     | --     | Intron          | SNP | 0.217 | 54 | 15 |
| --                 | chr1 | 172753828 | T    | G  | --     | --     | IGR             | SNP | 0.300 | 28 | 12 |
| --                 | chr1 | 173033466 | C    | G  | --     | --     | IGR             | SNP | 0.191 | 55 | 13 |
| <i>LOC10050602</i> | chr1 | 173362460 | C    | T  | --     | --     | RNA             | SNP | 0.699 | 25 | 58 |
| <i>RC3H1</i>       | chr1 | 173945073 | T    | A  | --     | --     | Intron          | SNP | 0.167 | 15 | 3  |
| --                 | chr1 | 173994488 | T    | A  | --     | --     | IGR             | SNP | 0.725 | 11 | 29 |
| --                 | chr1 | 174071336 | C    | A  | --     | --     | IGR             | SNP | 0.188 | 69 | 16 |
| --                 | chr1 | 174106877 | C    | T  | --     | --     | IGR             | SNP | 0.221 | 53 | 15 |
| --                 | chr1 | 174110273 | T    | A  | --     | --     | IGR             | SNP | 0.208 | 42 | 11 |
| <i>RABGAP1L</i>    | chr1 | 174171138 | -    | CA | --     | --     | Intron          | INS | 0.111 | 16 | 2  |
| <i>RABGAP1L</i>    | chr1 | 174232988 | C    | T  | --     | --     | Intron          | SNP | 0.564 | 17 | 22 |
| <i>RABGAP1L</i>    | chr1 | 174593380 | C    | G  | --     | --     | Intron          | SNP | 0.135 | 64 | 10 |
| <i>RABGAP1L</i>    | chr1 | 174663066 | A    | G  | --     | --     | Intron          | SNP | 0.145 | 47 | 8  |
| <i>RABGAP1L</i>    | chr1 | 174777135 | G    | T  | --     | --     | Intron          | SNP | 0.167 | 20 | 4  |
| <i>RABGAP1L</i>    | chr1 | 174917670 | G    | A  | --     | --     | Intron          | SNP | 0.190 | 17 | 4  |
| <i>RABGAP1L</i>    | chr1 | 174921502 | G    | A  | --     | --     | Intron          | SNP | 0.133 | 26 | 4  |
| <i>CACYBP</i>      | chr1 | 174972270 | G    | T  | --     | --     | Intron          | SNP | 0.167 | 30 | 6  |
| --                 | chr1 | 175020109 | C    | G  | --     | --     | IGR             | SNP | 0.171 | 68 | 14 |
| --                 | chr1 | 175265066 | C    | T  | --     | --     | IGR             | SNP | 0.250 | 39 | 13 |
| --                 | chr1 | 175268060 | C    | T  | --     | --     | IGR             | SNP | 0.203 | 51 | 13 |
| <i>TNR</i>         | chr1 | 175295993 | G    | A  | --     | --     | Intron          | SNP | 0.191 | 38 | 9  |
| <i>TNR</i>         | chr1 | 175344563 | CA   | -  | --     | --     | Intron          | DEL | 0.238 | 48 | 15 |
| <i>TNR</i>         | chr1 | 175407536 | C    | T  | --     | --     | Intron          | SNP | 0.190 | 17 | 4  |
| <i>TNR</i>         | chr1 | 175407569 | A    | G  | --     | --     | Intron          | SNP | 0.190 | 17 | 4  |
| <i>TNR</i>         | chr1 | 175655192 | GCA  | -  | --     | --     | Intron          | DEL | 0.145 | 52 | 9  |
| <i>TNR</i>         | chr1 | 175666030 | A    | G  | --     | --     | Intron          | SNP | 0.281 | 23 | 9  |
| --                 | chr1 | 175837412 | T    | G  | --     | --     | IGR             | SNP | 0.261 | 51 | 18 |
| <i>RFWD2</i>       | chr1 | 175956262 | G    | C  | --     | --     | Intron          | SNP | 0.306 | 25 | 11 |
| <i>RFWD2</i>       | chr1 | 175956609 | G    | A  | --     | --     | Intron          | SNP | 0.120 | 44 | 6  |
| <i>RFWD2</i>       | chr1 | 175975091 | -    | AG | --     | --     | Intron          | INS | 0.136 | 19 | 3  |
| --                 | chr1 | 176209129 | A    | T  | --     | --     | IGR             | SNP | 0.132 | 46 | 7  |
| <i>PAPPA2</i>      | chr1 | 176489423 | C    | G  | --     | --     | Intron          | SNP | 0.455 | 30 | 25 |
| <i>PAPPA2</i>      | chr1 | 176587756 | A    | G  | --     | --     | Intron          | SNP | 0.568 | 19 | 25 |
| <i>PAPPA2</i>      | chr1 | 176761000 | G    | C  | --     | --     | Intron          | SNP | 0.204 | 74 | 19 |
| <i>PAPPA2</i>      | chr1 | 176782070 | C    | A  | --     | --     | Intron          | SNP | 0.419 | 36 | 26 |
| <i>PAPPA2</i>      | chr1 | 176811564 | G    | A  | G5350A | D1784N | Missense_mutati | SNP | 0.465 | 38 | 33 |
| <i>ASTN1</i>       | chr1 | 176925348 | G    | A  | --     | --     | Intron          | SNP | 0.661 | 21 | 41 |
| <i>ASTN1</i>       | chr1 | 177005199 | G    | T  | --     | --     | Intron          | SNP | 0.200 | 16 | 4  |
| <i>ASTN1</i>       | chr1 | 177127830 | A    | G  | --     | --     | Intron          | SNP | 0.194 | 25 | 6  |
| <i>FAM5B</i>       | chr1 | 177224234 | A    | C  | --     | --     | Intron          | SNP | 0.354 | 31 | 17 |
| --                 | chr1 | 177368692 | A    | G  | --     | --     | IGR             | SNP | 0.259 | 20 | 7  |
| --                 | chr1 | 177376155 | C    | A  | --     | --     | IGR             | SNP | 0.289 | 54 | 22 |
| --                 | chr1 | 177467737 | C    | G  | --     | --     | IGR             | SNP | 0.147 | 58 | 10 |

|             |      |           |      |       |         |        |        |     |       |    |    |
|-------------|------|-----------|------|-------|---------|--------|--------|-----|-------|----|----|
| --          | chr1 | 177498418 | A    | G     | --      | --     | IGR    | SNP | 0.206 | 27 | 7  |
| --          | chr1 | 177528612 | T    | C     | --      | --     | IGR    | SNP | 0.120 | 66 | 9  |
| --          | chr1 | 177561926 | G    | A     | --      | --     | IGR    | SNP | 0.222 | 56 | 16 |
| --          | chr1 | 177572570 | C    | T     | --      | --     | IGR    | SNP | 0.208 | 19 | 5  |
| --          | chr1 | 177609748 | G    | T     | --      | --     | IGR    | SNP | 0.768 | 13 | 43 |
| --          | chr1 | 177879204 | T    | C     | --      | --     | IGR    | SNP | 0.232 | 53 | 16 |
| SEC16B      | chr1 | 177922159 | A    | T     | --      | --     | Intron | SNP | 0.121 | 29 | 4  |
| --          | chr1 | 178054697 | C    | T     | --      | --     | IGR    | SNP | 0.408 | 29 | 20 |
| LOC1003024C | chr1 | 178062912 | G    | A     | --      | --     | RNA    | SNP | 0.231 | 10 | 3  |
| RASAL2      | chr1 | 178287973 | G    | T     | --      | --     | Intron | SNP | 0.190 | 17 | 4  |
| --          | chr1 | 178530549 | A    | T     | --      | --     | IGR    | SNP | 0.206 | 54 | 14 |
| --          | chr1 | 178541371 | C    | T     | --      | --     | IGR    | SNP | 0.500 | 29 | 29 |
| --          | chr1 | 178552386 | C    | G     | --      | --     | IGR    | SNP | 0.278 | 52 | 20 |
| --          | chr1 | 178552460 | C    | G     | --      | --     | IGR    | SNP | 0.246 | 52 | 17 |
| --          | chr1 | 178552477 | C    | T     | --      | --     | IGR    | SNP | 0.247 | 61 | 20 |
| --          | chr1 | 178552854 | C    | G     | --      | --     | IGR    | SNP | 0.250 | 48 | 16 |
| --          | chr1 | 178552882 | C    | T     | --      | --     | IGR    | SNP | 0.219 | 50 | 14 |
| --          | chr1 | 178664693 | AGAT | -     | --      | --     | IGR    | DEL | 0.240 | 19 | 6  |
| --          | chr1 | 178664727 | TA   | -     | --      | --     | IGR    | DEL | 0.125 | 14 | 2  |
| RALGPS2     | chr1 | 178864687 | TG   | -     | --      | --     | Intron | DEL | 0.130 | 67 | 10 |
| --          | chr1 | 178961142 | CCT  | -     | --      | --     | IGR    | DEL | 0.129 | 27 | 4  |
| --          | chr1 | 178961198 | A    | G     | --      | --     | IGR    | SNP | 0.121 | 29 | 4  |
| ABL2        | chr1 | 179085981 | C    | T     | --      | --     | Intron | SNP | 0.172 | 24 | 5  |
| AXDND1      | chr1 | 179471721 | G    | A     | --      | --     | Intron | SNP | 0.190 | 17 | 4  |
| NPHS2       | chr1 | 179524602 | C    | G     | --      | --     | Intron | SNP | 0.213 | 48 | 13 |
| FAM163A     | chr1 | 179723541 | G    | A     | --      | --     | Intron | SNP | 0.197 | 49 | 12 |
| FAM163A     | chr1 | 179760960 | A    | G     | --      | --     | Intron | SNP | 0.203 | 55 | 14 |
| TOR1AIP2    | chr1 | 179830560 | T    | A     | --      | --     | 3'UTR  | SNP | 0.103 | 35 | 4  |
| --          | chr1 | 180107930 | A    | T     | --      | --     | IGR    | SNP | 0.178 | 37 | 8  |
| ACBD6       | chr1 | 180282725 | C    | T     | --      | --     | Intron | SNP | 0.756 | 10 | 31 |
| ACBD6       | chr1 | 180282778 | C    | A     | --      | --     | Intron | SNP | 0.732 | 11 | 30 |
| ACBD6       | chr1 | 180283166 | C    | T     | --      | --     | Intron | SNP | 0.660 | 16 | 31 |
| ACBD6       | chr1 | 180283302 | C    | G     | --      | --     | Intron | SNP | 0.659 | 14 | 27 |
| ACBD6       | chr1 | 180283464 | C    | G     | --      | --     | Intron | SNP | 0.682 | 14 | 30 |
| ACBD6       | chr1 | 180411517 | T    | G     | --      | --     | Intron | SNP | 0.327 | 37 | 18 |
| --          | chr1 | 180544798 | A    | C     | --      | --     | IGR    | SNP | 0.205 | 35 | 9  |
| XPR1        | chr1 | 180733839 | C    | G     | --      | --     | Intron | SNP | 0.103 | 26 | 3  |
| XPR1        | chr1 | 180848056 | A    | G     | --      | --     | Intron | SNP | 0.233 | 46 | 14 |
| MR1         | chr1 | 181021148 | G    | A     | --      | --     | Intron | SNP | 0.219 | 57 | 16 |
| --          | chr1 | 181054946 | G    | T     | --      | --     | IGR    | SNP | 0.174 | 19 | 4  |
| --          | chr1 | 181368398 | C    | A     | --      | --     | IGR    | SNP | 0.133 | 39 | 6  |
| --          | chr1 | 181401509 | A    | T     | --      | --     | IGR    | SNP | 0.316 | 26 | 12 |
| CACNA1E     | chr1 | 181643557 | G    | A     | --      | --     | Intron | SNP | 0.158 | 16 | 3  |
| --          | chr1 | 181778632 | A    | C     | --      | --     | IGR    | SNP | 0.231 | 30 | 9  |
| --          | chr1 | 181789057 | A    | T     | --      | --     | IGR    | SNP | 0.182 | 36 | 8  |
| --          | chr1 | 181958014 | C    | T     | --      | --     | IGR    | SNP | 0.200 | 48 | 12 |
| --          | chr1 | 182045523 | G    | C     | --      | --     | IGR    | SNP | 0.327 | 33 | 16 |
| --          | chr1 | 182179888 | T    | A     | --      | --     | IGR    | SNP | 0.190 | 47 | 11 |
| --          | chr1 | 182609790 | G    | A     | --      | --     | IGR    | SNP | 0.217 | 54 | 15 |
| --          | chr1 | 182690048 | -    | GTGTA | --      | --     | IGR    | INS | 0.111 | 16 | 2  |
| --          | chr1 | 183119228 | C    | T     | --      | --     | IGR    | SNP | 0.550 | 18 | 22 |
| NMNAT2      | chr1 | 183263033 | C    | T     | --      | --     | Intron | SNP | 0.237 | 45 | 14 |
| NMNAT2      | chr1 | 183291498 | G    | A     | --      | --     | Intron | SNP | 0.304 | 48 | 21 |
| NMNAT2      | chr1 | 183300251 | C    | T     | --      | --     | Intron | SNP | 0.148 | 52 | 9  |
| NMNAT2      | chr1 | 183341326 | G    | T     | --      | --     | Intron | SNP | 0.113 | 47 | 6  |
| NMNAT2      | chr1 | 183369660 | G    | A     | --      | --     | Intron | SNP | 0.214 | 11 | 3  |
| --          | chr1 | 183580869 | G    | T     | --      | --     | IGR    | SNP | 0.190 | 17 | 4  |
| --          | chr1 | 184105935 | C    | T     | --      | --     | IGR    | SNP | 0.246 | 43 | 14 |
| --          | chr1 | 184116309 | G    | A     | --      | --     | IGR    | SNP | 0.319 | 47 | 22 |
| --          | chr1 | 184183559 | GAT  | -     | --      | --     | IGR    | DEL | 0.143 | 12 | 2  |
| C1orf21     | chr1 | 184366951 | C    | T     | --      | --     | Intron | SNP | 0.274 | 45 | 17 |
| C1orf21     | chr1 | 184525059 | C    | G     | --      | --     | Intron | SNP | 0.614 | 22 | 35 |
| C1orf21     | chr1 | 184543988 | GT   | -     | --      | --     | Intron | DEL | 0.263 | 42 | 15 |
| C1orf21     | chr1 | 184573753 | A    | C     | --      | --     | Intron | SNP | 0.218 | 68 | 19 |
| --          | chr1 | 184621029 | G    | A     | --      | --     | IGR    | SNP | 0.273 | 48 | 18 |
| EDEM3       | chr1 | 184723221 | C    | T     | --      | --     | Intron | SNP | 0.255 | 41 | 14 |
| FAM129A     | chr1 | 184887209 | C    | G     | --      | --     | Intron | SNP | 0.220 | 46 | 13 |
| --          | chr1 | 184964062 | T    | G     | --      | --     | IGR    | SNP | 0.179 | 32 | 7  |
| TRMT1L      | chr1 | 185112146 | A    | T     | --      | --     | Intron | SNP | 0.200 | 32 | 8  |
| SWT1        | chr1 | 185160518 | T    | G     | --      | --     | Intron | SNP | 0.244 | 34 | 11 |
| IVNS1ABP    | chr1 | 185284268 | T    | C     | --      | --     | Intron | SNP | 0.125 | 49 | 7  |
| --          | chr1 | 185368328 | AAT  | -     | --      | --     | IGR    | DEL | 0.130 | 20 | 3  |
| HMCN1       | chr1 | 185859559 | T    | C     | --      | --     | Intron | SNP | 0.231 | 10 | 3  |
| HMCN1       | chr1 | 185859560 | G    | A     | --      | --     | Intron | SNP | 0.214 | 11 | 3  |
| HMCN1       | chr1 | 185859721 | A    | T     | --      | --     | Intron | SNP | 0.167 | 15 | 3  |
| HMCN1       | chr1 | 185859744 | T    | A     | --      | --     | Intron | SNP | 0.188 | 13 | 3  |
| MIR548F1    | chr1 | 186116893 | T    | A     | --      | --     | RNA    | SNP | 0.286 | 40 | 16 |
| HMCN1       | chr1 | 186120811 | A    | T     | A14832T | A4944A | Silent | SNP | 0.269 | 38 | 14 |
| MIR548F1    | chr1 | 186214476 | T    | G     | --      | --     | RNA    | SNP | 0.214 | 44 | 12 |
| MIR548F1    | chr1 | 186221657 | G    | A     | --      | --     | RNA    | SNP | 0.548 | 14 | 17 |

|          |      |           |       |          |    |    |        |     |       |    |    |
|----------|------|-----------|-------|----------|----|----|--------|-----|-------|----|----|
| MIR548F1 | chr1 | 186221658 | C     | G        | -- | -- | RNA    | SNP | 0.545 | 15 | 18 |
| PLA2G4A  | chr1 | 186949369 | -     | CCGAGCCA | -- | -- | Intron | INS | 0.203 | 46 | 12 |
| --       | chr1 | 187097049 | A     | T        | -- | -- | IGR    | SNP | 0.365 | 33 | 19 |
| --       | chr1 | 187256816 | C     | G        | -- | -- | IGR    | SNP | 0.408 | 29 | 20 |
| --       | chr1 | 187277707 | T     | G        | -- | -- | IGR    | SNP | 0.520 | 24 | 26 |
| --       | chr1 | 187277733 | C     | G        | -- | -- | IGR    | SNP | 0.449 | 27 | 22 |
| --       | chr1 | 187327229 | C     | T        | -- | -- | IGR    | SNP | 0.146 | 35 | 6  |
| --       | chr1 | 187344057 | C     | G        | -- | -- | IGR    | SNP | 0.259 | 43 | 15 |
| --       | chr1 | 187452885 | A     | G        | -- | -- | IGR    | SNP | 0.125 | 49 | 7  |
| --       | chr1 | 187452886 | C     | A        | -- | -- | IGR    | SNP | 0.123 | 50 | 7  |
| --       | chr1 | 187454242 | A     | C        | -- | -- | IGR    | SNP | 0.241 | 41 | 13 |
| --       | chr1 | 187602940 | G     | C        | -- | -- | IGR    | SNP | 0.190 | 17 | 4  |
| --       | chr1 | 187750319 | A     | G        | -- | -- | IGR    | SNP | 0.220 | 46 | 13 |
| --       | chr1 | 187757978 | G     | A        | -- | -- | IGR    | SNP | 0.196 | 37 | 9  |
| --       | chr1 | 187785827 | G     | T        | -- | -- | IGR    | SNP | 0.209 | 34 | 9  |
| --       | chr1 | 187907546 | C     | A        | -- | -- | IGR    | SNP | 0.480 | 26 | 24 |
| --       | chr1 | 187923319 | C     | T        | -- | -- | IGR    | SNP | 0.170 | 44 | 9  |
| --       | chr1 | 187952297 | T     | A        | -- | -- | IGR    | SNP | 0.395 | 26 | 17 |
| --       | chr1 | 187991240 | G     | C        | -- | -- | IGR    | SNP | 0.275 | 29 | 11 |
| --       | chr1 | 188350059 | C     | A        | -- | -- | IGR    | SNP | 0.154 | 33 | 6  |
| --       | chr1 | 188357590 | A     | G        | -- | -- | IGR    | SNP | 0.216 | 29 | 8  |
| --       | chr1 | 188668321 | A     | C        | -- | -- | IGR    | SNP | 0.214 | 44 | 12 |
| --       | chr1 | 189004309 | T     | C        | -- | -- | IGR    | SNP | 0.122 | 36 | 5  |
| --       | chr1 | 189183326 | C     | A        | -- | -- | IGR    | SNP | 0.214 | 33 | 9  |
| --       | chr1 | 189271952 | C     | T        | -- | -- | IGR    | SNP | 0.469 | 26 | 23 |
| --       | chr1 | 189337467 | T     | A        | -- | -- | IGR    | SNP | 0.250 | 39 | 13 |
| --       | chr1 | 189577815 | A     | T        | -- | -- | IGR    | SNP | 0.200 | 40 | 10 |
| --       | chr1 | 189592389 | T     | C        | -- | -- | IGR    | SNP | 0.264 | 39 | 14 |
| --       | chr1 | 189682286 | C     | A        | -- | -- | IGR    | SNP | 0.271 | 43 | 16 |
| --       | chr1 | 189934449 | G     | T        | -- | -- | IGR    | SNP | 0.130 | 20 | 3  |
| --       | chr1 | 189953826 | G     | T        | -- | -- | IGR    | SNP | 0.232 | 43 | 13 |
| --       | chr1 | 189981965 | C     | G        | -- | -- | IGR    | SNP | 0.318 | 30 | 14 |
| --       | chr1 | 189982867 | GAT   | -        | -- | -- | IGR    | DEL | 0.107 | 25 | 3  |
| FAM5C    | chr1 | 190077193 | G     | T        | -- | -- | Intron | SNP | 0.246 | 49 | 16 |
| FAM5C    | chr1 | 190223814 | TG    | -        | -- | -- | Intron | DEL | 0.471 | 9  | 8  |
| FAM5C    | chr1 | 190277208 | A     | C        | -- | -- | Intron | SNP | 0.280 | 36 | 14 |
| FAM5C    | chr1 | 190332157 | TA    | -        | -- | -- | Intron | DEL | 0.208 | 38 | 10 |
| FAM5C    | chr1 | 190346679 | AAT   | -        | -- | -- | Intron | DEL | 0.111 | 16 | 2  |
| FAM5C    | chr1 | 190373851 | A     | C        | -- | -- | Intron | SNP | 0.569 | 25 | 33 |
| FAM5C    | chr1 | 190414217 | T     | G        | -- | -- | Intron | SNP | 0.255 | 35 | 12 |
| --       | chr1 | 190562978 | C     | A        | -- | -- | IGR    | SNP | 0.350 | 26 | 14 |
| --       | chr1 | 190585142 | C     | T        | -- | -- | IGR    | SNP | 0.670 | 31 | 63 |
| --       | chr1 | 190923713 | T     | G        | -- | -- | IGR    | SNP | 0.458 | 26 | 22 |
| --       | chr1 | 191012445 | G     | T        | -- | -- | IGR    | SNP | 0.357 | 27 | 15 |
| --       | chr1 | 191052478 | T     | C        | -- | -- | IGR    | SNP | 0.328 | 43 | 21 |
| --       | chr1 | 191081499 | T     | A        | -- | -- | IGR    | SNP | 0.229 | 37 | 11 |
| --       | chr1 | 191104115 | G     | A        | -- | -- | IGR    | SNP | 0.295 | 43 | 18 |
| --       | chr1 | 191146763 | A     | G        | -- | -- | IGR    | SNP | 0.226 | 24 | 7  |
| --       | chr1 | 191275725 | T     | G        | -- | -- | IGR    | SNP | 0.169 | 54 | 11 |
| --       | chr1 | 191404982 | A     | G        | -- | -- | IGR    | SNP | 0.538 | 6  | 7  |
| --       | chr1 | 191698141 | G     | T        | -- | -- | IGR    | SNP | 0.471 | 27 | 24 |
| --       | chr1 | 191757580 | C     | A        | -- | -- | IGR    | SNP | 0.209 | 34 | 9  |
| --       | chr1 | 191988432 | T     | A        | -- | -- | IGR    | SNP | 0.231 | 20 | 6  |
| RGS18    | chr1 | 192133873 | G     | C        | -- | -- | Intron | SNP | 0.229 | 37 | 11 |
| --       | chr1 | 192165032 | C     | G        | -- | -- | IGR    | SNP | 0.105 | 34 | 4  |
| --       | chr1 | 192450091 | G     | A        | -- | -- | IGR    | SNP | 0.122 | 36 | 5  |
| --       | chr1 | 192531325 | T     | A        | -- | -- | IGR    | SNP | 0.185 | 22 | 5  |
| --       | chr1 | 192660686 | T     | G        | -- | -- | IGR    | SNP | 0.429 | 28 | 21 |
| TROVE2   | chr1 | 193052505 | A     | C        | -- | -- | Intron | SNP | 0.267 | 33 | 12 |
| --       | chr1 | 193290240 | C     | T        | -- | -- | IGR    | SNP | 0.483 | 31 | 29 |
| --       | chr1 | 193299619 | G     | C        | -- | -- | IGR    | SNP | 0.173 | 43 | 9  |
| --       | chr1 | 193316387 | C     | G        | -- | -- | IGR    | SNP | 0.738 | 16 | 45 |
| --       | chr1 | 193699796 | C     | T        | -- | -- | IGR    | SNP | 0.185 | 22 | 5  |
| --       | chr1 | 193960201 | G     | A        | -- | -- | IGR    | SNP | 0.241 | 44 | 14 |
| --       | chr1 | 194008330 | C     | T        | -- | -- | IGR    | SNP | 0.219 | 57 | 16 |
| --       | chr1 | 194019908 | -     | CA       | -- | -- | IGR    | INS | 0.192 | 42 | 10 |
| --       | chr1 | 194208703 | A     | G        | -- | -- | IGR    | SNP | 0.412 | 20 | 14 |
| --       | chr1 | 194404753 | A     | G        | -- | -- | IGR    | SNP | 0.231 | 20 | 6  |
| --       | chr1 | 194601170 | T     | A        | -- | -- | IGR    | SNP | 0.607 | 11 | 17 |
| --       | chr1 | 194791781 | A     | T        | -- | -- | IGR    | SNP | 0.421 | 11 | 8  |
| --       | chr1 | 195156496 | G     | A        | -- | -- | IGR    | SNP | 0.424 | 19 | 14 |
| --       | chr1 | 195214503 | C     | T        | -- | -- | IGR    | SNP | 0.250 | 9  | 3  |
| --       | chr1 | 195508690 | G     | T        | -- | -- | IGR    | SNP | 0.333 | 10 | 5  |
| --       | chr1 | 195882293 | G     | T        | -- | -- | IGR    | SNP | 0.292 | 17 | 7  |
| KCNT2    | chr1 | 196257604 | G     | T        | -- | -- | Intron | SNP | 0.243 | 28 | 9  |
| KCNT2    | chr1 | 196267866 | T     | C        | -- | -- | Intron | SNP | 0.375 | 20 | 12 |
| KCNT2    | chr1 | 196497705 | G     | A        | -- | -- | Intron | SNP | 0.522 | 11 | 12 |
| --       | chr1 | 196588992 | C     | A        | -- | -- | IGR    | SNP | 0.391 | 14 | 9  |
| CFH      | chr1 | 196713013 | T     | G        | -- | -- | Intron | SNP | 0.296 | 19 | 8  |
| CFHR3    | chr1 | 196756568 | ATTTC | -        | -- | -- | Intron | DEL | 0.111 | 16 | 2  |

|                    |      |           |     |     |       |       |         |     |       |    |    |
|--------------------|------|-----------|-----|-----|-------|-------|---------|-----|-------|----|----|
| --                 | chr1 | 196907774 | G   | C   | --    | --    | IGR     | SNP | 0.217 | 18 | 5  |
| --                 | chr1 | 196907781 | G   | A   | --    | --    | IGR     | SNP | 0.160 | 21 | 4  |
| --                 | chr1 | 197044392 | AAC | -   | --    | --    | IGR     | DEL | 0.105 | 17 | 2  |
| <i>CRB1</i>        | chr1 | 197375193 | G   | A   | --    | --    | Intron  | SNP | 0.333 | 4  | 2  |
| <i>DENND1B</i>     | chr1 | 197635423 | T   | C   | --    | --    | Intron  | SNP | 0.619 | 8  | 13 |
| --                 | chr1 | 197820134 | G   | C   | --    | --    | IGR     | SNP | 0.519 | 13 | 14 |
| --                 | chr1 | 198007531 | C   | T   | --    | --    | IGR     | SNP | 0.500 | 10 | 10 |
| --                 | chr1 | 198336732 | C   | T   | --    | --    | IGR     | SNP | 0.250 | 9  | 3  |
| --                 | chr1 | 198420850 | G   | A   | --    | --    | IGR     | SNP | 0.429 | 16 | 12 |
| --                 | chr1 | 198595152 | G   | A   | --    | --    | IGR     | SNP | 0.125 | 21 | 3  |
| <i>LOC10013125</i> | chr1 | 198790977 | G   | T   | --    | --    | RNA     | SNP | 0.385 | 16 | 10 |
| --                 | chr1 | 198923280 | A   | C   | --    | --    | IGR     | SNP | 0.444 | 15 | 12 |
| --                 | chr1 | 199315652 | C   | T   | --    | --    | IGR     | SNP | 0.579 | 8  | 11 |
| --                 | chr1 | 199358411 | T   | A   | --    | --    | IGR     | SNP | 0.211 | 15 | 4  |
| --                 | chr1 | 199475265 | C   | A   | --    | --    | IGR     | SNP | 0.375 | 15 | 9  |
| --                 | chr1 | 199647103 | A   | C   | --    | --    | IGR     | SNP | 0.485 | 17 | 16 |
| --                 | chr1 | 199680639 | C   | G   | --    | --    | IGR     | SNP | 0.407 | 16 | 11 |
| --                 | chr1 | 199718236 | G   | T   | --    | --    | IGR     | SNP | 0.222 | 14 | 4  |
| --                 | chr1 | 199941018 | G   | T   | --    | --    | IGR     | SNP | 0.129 | 27 | 4  |
| <i>C1orf98</i>     | chr1 | 200310970 | T   | G   | --    | --    | 3'Flank | SNP | 0.286 | 10 | 4  |
| <i>C1orf98</i>     | chr1 | 200322674 | C   | A   | --    | --    | RNA     | SNP | 0.310 | 20 | 9  |
| <i>KIF14</i>       | chr1 | 200583884 | T   | C   | --    | --    | Intron  | SNP | 0.333 | 18 | 9  |
| <i>LGR6</i>        | chr1 | 202225668 | A   | G   | --    | --    | Intron  | SNP | 0.194 | 29 | 7  |
| <i>PPP1R12B</i>    | chr1 | 202526334 | G   | A   | --    | --    | Intron  | SNP | 0.343 | 23 | 12 |
| <i>SYT2</i>        | chr1 | 202620166 | A   | G   | --    | --    | Intron  | SNP | 0.378 | 23 | 14 |
| <i>SYT2</i>        | chr1 | 202657249 | C   | A   | --    | --    | Intron  | SNP | 0.375 | 20 | 12 |
| <i>CHIT1</i>       | chr1 | 203191284 | C   | T   | --    | --    | Intron  | SNP | 0.487 | 20 | 19 |
| --                 | chr1 | 203326528 | C   | T   | --    | --    | IGR     | SNP | 0.297 | 26 | 11 |
| --                 | chr1 | 203371626 | T   | G   | --    | --    | IGR     | SNP | 0.433 | 17 | 13 |
| --                 | chr1 | 203426041 | G   | A   | --    | --    | IGR     | SNP | 0.111 | 24 | 3  |
| --                 | chr1 | 203556938 | T   | C   | --    | --    | IGR     | SNP | 0.293 | 29 | 12 |
| --                 | chr1 | 203853642 | C   | T   | --    | --    | IGR     | SNP | 0.367 | 19 | 11 |
| --                 | chr1 | 204029070 | T   | C   | --    | --    | IGR     | SNP | 0.400 | 12 | 8  |
| <i>SOX13</i>       | chr1 | 204050055 | G   | T   | --    | --    | Intron  | SNP | 0.154 | 22 | 4  |
| <i>MDM4</i>        | chr1 | 204509284 | G   | T   | --    | --    | Intron  | SNP | 0.125 | 21 | 3  |
| --                 | chr1 | 205000610 | C   | T   | --    | --    | IGR     | SNP | 0.360 | 16 | 9  |
| <i>TMCC2</i>       | chr1 | 205212000 | G   | T   | --    | --    | Intron  | SNP | 0.333 | 26 | 13 |
| <i>TMCC2</i>       | chr1 | 205212014 | G   | A   | --    | --    | Intron  | SNP | 0.387 | 19 | 12 |
| <i>LEMD1</i>       | chr1 | 205374149 | A   | C   | --    | --    | Intron  | SNP | 0.800 | 1  | 4  |
| <i>LEMD1</i>       | chr1 | 205374151 | A   | G   | --    | --    | Intron  | SNP | 0.800 | 1  | 4  |
| --                 | chr1 | 205466126 | C   | G   | --    | --    | IGR     | SNP | 0.432 | 21 | 16 |
| <i>SLC26A9</i>     | chr1 | 205897159 | C   | A   | G972T | S324S | Silent  | SNP | 0.431 | 29 | 22 |
| --                 | chr1 | 206087024 | C   | T   | --    | --    | IGR     | SNP | 0.194 | 25 | 6  |
| <i>C1orf186</i>    | chr1 | 206277413 | G   | A   | --    | --    | Intron  | SNP | 0.176 | 14 | 3  |
| <i>SRGAP2</i>      | chr1 | 206559431 | A   | T   | --    | --    | Intron  | SNP | 0.145 | 47 | 8  |
| --                 | chr1 | 206953202 | -   | TC  | --    | --    | IGR     | INS | 0.313 | 22 | 10 |
| --                 | chr1 | 207554633 | A   | G   | --    | --    | IGR     | SNP | 0.308 | 18 | 8  |
| <i>CR1</i>         | chr1 | 207682270 | C   | T   | --    | --    | Intron  | SNP | 0.148 | 23 | 4  |
| <i>CR1</i>         | chr1 | 207792740 | G   | A   | --    | --    | Intron  | SNP | 0.333 | 12 | 6  |
| --                 | chr1 | 207903085 | G   | A   | --    | --    | IGR     | SNP | 0.278 | 26 | 10 |
| --                 | chr1 | 207970239 | AT  | -   | --    | --    | IGR     | DEL | 0.111 | 16 | 2  |
| <i>PLXNA2</i>      | chr1 | 208333699 | A   | G   | --    | --    | Intron  | SNP | 0.238 | 16 | 5  |
| --                 | chr1 | 208446342 | C   | G   | --    | --    | IGR     | SNP | 0.333 | 22 | 11 |
| --                 | chr1 | 208554679 | C   | T   | --    | --    | IGR     | SNP | 0.400 | 21 | 14 |
| --                 | chr1 | 209277524 | T   | G   | --    | --    | IGR     | SNP | 0.526 | 9  | 10 |
| --                 | chr1 | 209386492 | T   | A   | --    | --    | IGR     | SNP | 0.143 | 24 | 4  |
| --                 | chr1 | 209388915 | AT  | -   | --    | --    | IGR     | DEL | 0.489 | 23 | 22 |
| <i>HSD11B1</i>     | chr1 | 209909163 | C   | G   | --    | --    | 3'Flank | SNP | 0.350 | 26 | 14 |
| <i>HHAT</i>        | chr1 | 210538653 | G   | T   | --    | --    | Intron  | SNP | 0.267 | 11 | 4  |
| <i>HHAT</i>        | chr1 | 210626348 | C   | T   | --    | --    | Intron  | SNP | 0.364 | 14 | 8  |
| <i>KCNH1</i>       | chr1 | 211080748 | -   | CT  | --    | --    | Intron  | INS | 0.447 | 21 | 17 |
| <i>KCNH1</i>       | chr1 | 211148933 | C   | A   | --    | --    | Intron  | SNP | 0.158 | 16 | 3  |
| <i>KCNH1</i>       | chr1 | 211252553 | A   | G   | --    | --    | Intron  | SNP | 0.500 | 4  | 4  |
| <i>KCNH1</i>       | chr1 | 211266989 | -   | TTG | --    | --    | Intron  | INS | 0.356 | 29 | 16 |
| --                 | chr1 | 211708507 | T   | C   | --    | --    | IGR     | SNP | 0.214 | 11 | 3  |
| <i>LPGAT1</i>      | chr1 | 211972123 | C   | T   | --    | --    | Intron  | SNP | 0.455 | 18 | 15 |
| <i>PPP2R5A</i>     | chr1 | 212465253 | C   | A   | --    | --    | Intron  | SNP | 0.442 | 24 | 19 |
| --                 | chr1 | 212691472 | C   | T   | --    | --    | IGR     | SNP | 0.400 | 12 | 8  |
| --                 | chr1 | 212737585 | G   | A   | --    | --    | IGR     | SNP | 0.375 | 20 | 12 |
| <i>RPS6KC1</i>     | chr1 | 213264098 | G   | A   | --    | --    | Intron  | SNP | 0.444 | 10 | 8  |
| <i>PTPN14</i>      | chr1 | 214524632 | C   | A   | --    | --    | 3'UTR   | SNP | 0.143 | 36 | 6  |
| <i>PTPN14</i>      | chr1 | 214531502 | A   | T   | --    | --    | Intron  | SNP | 0.172 | 53 | 11 |
| <i>PTPN14</i>      | chr1 | 214536837 | A   | T   | --    | --    | Intron  | SNP | 0.286 | 45 | 18 |
| <i>PTPN14</i>      | chr1 | 214575780 | C   | A   | --    | --    | Intron  | SNP | 0.444 | 5  | 4  |
| --                 | chr1 | 214978799 | G   | A   | --    | --    | IGR     | SNP | 0.139 | 68 | 11 |
| <i>KCNK2</i>       | chr1 | 215206284 | T   | G   | --    | --    | Intron  | SNP | 0.123 | 57 | 8  |
| <i>KCNK2</i>       | chr1 | 215308237 | -   | CTA | --    | --    | Intron  | INS | 0.226 | 23 | 7  |
| --                 | chr1 | 215715938 | G   | A   | --    | --    | IGR     | SNP | 0.105 | 51 | 6  |
| --                 | chr1 | 215726946 | C   | A   | --    | --    | IGR     | SNP | 0.273 | 32 | 12 |
| <i>USH2A</i>       | chr1 | 216042024 | A   | G   | --    | --    | Intron  | SNP | 0.149 | 57 | 10 |



|           |      |           |        |      |    |    |        |     |       |    |    |
|-----------|------|-----------|--------|------|----|----|--------|-----|-------|----|----|
| USH2A     | chr1 | 216240191 | T      | C    | -- | -- | Intron | SNP | 0.833 | 11 | 55 |
| USH2A     | chr1 | 216279471 | T      | C    | -- | -- | Intron | SNP | 1.000 | 0  | 20 |
| USH2A     | chr1 | 216325790 | C      | T    | -- | -- | Intron | SNP | 0.100 | 27 | 3  |
| USH2A     | chr1 | 216437020 | G      | T    | -- | -- | Intron | SNP | 0.235 | 62 | 19 |
| USH2A     | chr1 | 216497740 | C      | T    | -- | -- | Intron | SNP | 0.140 | 37 | 6  |
| USH2A     | chr1 | 216509158 | A      | G    | -- | -- | Intron | SNP | 0.111 | 56 | 7  |
| --        | chr1 | 216653552 | C      | A    | -- | -- | IGR    | SNP | 0.125 | 28 | 4  |
| ESRRG     | chr1 | 216855503 | C      | T    | -- | -- | Intron | SNP | 0.200 | 48 | 12 |
| ESRRG     | chr1 | 216883721 | C      | T    | -- | -- | Intron | SNP | 0.132 | 59 | 9  |
| ESRRG     | chr1 | 217019416 | A      | G    | -- | -- | Intron | SNP | 0.219 | 57 | 16 |
| --        | chr1 | 217370124 | G      | T    | -- | -- | IGR    | SNP | 0.780 | 13 | 46 |
| --        | chr1 | 217378301 | G      | T    | -- | -- | IGR    | SNP | 0.750 | 9  | 27 |
| --        | chr1 | 217387367 | C      | G    | -- | -- | IGR    | SNP | 0.841 | 7  | 37 |
| --        | chr1 | 217387421 | C      | A    | -- | -- | IGR    | SNP | 0.796 | 11 | 43 |
| GPATCH2   | chr1 | 217660074 | C      | A    | -- | -- | Intron | SNP | 0.118 | 60 | 8  |
| --        | chr1 | 218140603 | C      | A    | -- | -- | IGR    | SNP | 0.771 | 16 | 54 |
| --        | chr1 | 218272753 | G      | T    | -- | -- | IGR    | SNP | 0.156 | 54 | 10 |
| --        | chr1 | 218409193 | G      | T    | -- | -- | IGR    | SNP | 0.833 | 7  | 35 |
| LOC643723 | chr1 | 219261672 | G      | C    | -- | -- | RNA    | SNP | 0.321 | 19 | 9  |
| LOC643723 | chr1 | 219302643 | A      | C    | -- | -- | RNA    | SNP | 0.412 | 10 | 7  |
| --        | chr1 | 219849859 | C      | A    | -- | -- | IGR    | SNP | 0.378 | 28 | 17 |
| --        | chr1 | 219850799 | A      | G    | -- | -- | IGR    | SNP | 0.417 | 14 | 10 |
| --        | chr1 | 219928812 | A      | T    | -- | -- | IGR    | SNP | 0.300 | 21 | 9  |
| --        | chr1 | 219979298 | A      | C    | -- | -- | IGR    | SNP | 0.316 | 13 | 6  |
| RNU5F-1   | chr1 | 220230239 | A      | C    | -- | -- | RNA    | SNP | 0.130 | 20 | 3  |
| --        | chr1 | 220583351 | A      | C    | -- | -- | IGR    | SNP | 0.500 | 11 | 11 |
| MARK1     | chr1 | 220710110 | A      | G    | -- | -- | Intron | SNP | 0.167 | 20 | 4  |
| MARK1     | chr1 | 220797225 | C      | T    | -- | -- | Intron | SNP | 0.457 | 25 | 21 |
| --        | chr1 | 220993029 | G      | A    | -- | -- | IGR    | SNP | 0.343 | 23 | 12 |
| --        | chr1 | 221220564 | A      | T    | -- | -- | IGR    | SNP | 0.107 | 25 | 3  |
| --        | chr1 | 221274000 | G      | C    | -- | -- | IGR    | SNP | 0.176 | 14 | 3  |
| --        | chr1 | 221340995 | C      | A    | -- | -- | IGR    | SNP | 0.435 | 13 | 10 |
| --        | chr1 | 221558400 | -      | TCTC | -- | -- | IGR    | INS | 0.133 | 13 | 2  |
| --        | chr1 | 221783944 | C      | T    | -- | -- | IGR    | SNP | 0.375 | 10 | 6  |
| --        | chr1 | 221808044 | G      | C    | -- | -- | IGR    | SNP | 0.414 | 17 | 12 |
| --        | chr1 | 222049624 | G      | T    | -- | -- | IGR    | SNP | 0.176 | 14 | 3  |
| --        | chr1 | 222062699 | G      | A    | -- | -- | IGR    | SNP | 0.438 | 18 | 14 |
| --        | chr1 | 222457722 | C      | T    | -- | -- | IGR    | SNP | 0.400 | 12 | 8  |
| --        | chr1 | 222692087 | G      | C    | -- | -- | IGR    | SNP | 0.353 | 11 | 6  |
| AIDA      | chr1 | 222870582 | G      | T    | -- | -- | Intron | SNP | 0.125 | 21 | 3  |
| DISP1     | chr1 | 223045364 | C      | T    | -- | -- | Intron | SNP | 0.500 | 4  | 4  |
| DISP1     | chr1 | 223045408 | T      | C    | -- | -- | Intron | SNP | 0.444 | 5  | 4  |
| DISP1     | chr1 | 223076792 | A      | T    | -- | -- | Intron | SNP | 0.333 | 8  | 4  |
| DISP1     | chr1 | 223162020 | G      | T    | -- | -- | Intron | SNP | 0.250 | 12 | 4  |
| TLR5      | chr1 | 223305969 | GA     | -    | -- | -- | 5'UTR  | DEL | 0.455 | 12 | 10 |
| --        | chr1 | 223592090 | TTTTTC | -    | -- | -- | IGR    | DEL | 0.176 | 14 | 3  |
| --        | chr1 | 223616081 | C      | T    | -- | -- | IGR    | SNP | 0.333 | 24 | 12 |
| --        | chr1 | 223858724 | C      | A    | -- | -- | IGR    | SNP | 0.241 | 22 | 7  |
| CAPN2     | chr1 | 223949364 | C      | G    | -- | -- | Intron | SNP | 0.389 | 11 | 7  |
| --        | chr1 | 224108932 | T      | C    | -- | -- | IGR    | SNP | 0.192 | 21 | 5  |
| --        | chr1 | 224119601 | G      | A    | -- | -- | IGR    | SNP | 0.188 | 13 | 3  |
| --        | chr1 | 224175181 | C      | A    | -- | -- | IGR    | SNP | 0.103 | 26 | 3  |
| --        | chr1 | 224200050 | A      | T    | -- | -- | IGR    | SNP | 0.143 | 42 | 7  |
| --        | chr1 | 224227425 | A      | G    | -- | -- | IGR    | SNP | 0.105 | 34 | 4  |
| --        | chr1 | 224263084 | G      | A    | -- | -- | IGR    | SNP | 0.500 | 19 | 19 |
| WDR26     | chr1 | 224615803 | C      | G    | -- | -- | Intron | SNP | 0.435 | 13 | 10 |
| ENAH      | chr1 | 225768634 | G      | A    | -- | -- | Intron | SNP | 0.190 | 17 | 4  |
| --        | chr1 | 225856182 | A      | T    | -- | -- | IGR    | SNP | 0.276 | 21 | 8  |
| --        | chr1 | 225873939 | A      | T    | -- | -- | IGR    | SNP | 0.441 | 19 | 15 |
| TMEM63A   | chr1 | 226064058 | C      | A    | -- | -- | Intron | SNP | 0.607 | 22 | 34 |
| --        | chr1 | 226380592 | TA     | -    | -- | -- | IGR    | DEL | 0.125 | 14 | 2  |
| --        | chr1 | 226666000 | -      | GT   | -- | -- | IGR    | INS | 0.560 | 11 | 14 |
| --        | chr1 | 227043299 | A      | G    | -- | -- | IGR    | SNP | 0.333 | 14 | 7  |
| CDC42BPA  | chr1 | 227308177 | C      | T    | -- | -- | Intron | SNP | 1.000 | 0  | 14 |
| --        | chr1 | 227572240 | A      | G    | -- | -- | IGR    | SNP | 0.750 | 3  | 9  |
| --        | chr1 | 228575957 | C      | A    | -- | -- | IGR    | SNP | 0.875 | 3  | 21 |
| --        | chr1 | 228910859 | G      | A    | -- | -- | IGR    | SNP | 0.148 | 23 | 4  |
| --        | chr1 | 229189314 | T      | C    | -- | -- | IGR    | SNP | 0.256 | 32 | 11 |
| --        | chr1 | 229389554 | G      | T    | -- | -- | IGR    | SNP | 0.576 | 14 | 19 |
| --        | chr1 | 229491800 | G      | C    | -- | -- | IGR    | SNP | 0.419 | 18 | 13 |
| TAF5L     | chr1 | 229732305 | C      | T    | -- | -- | Intron | SNP | 0.556 | 12 | 15 |
| --        | chr1 | 229814794 | T      | C    | -- | -- | IGR    | SNP | 0.211 | 15 | 4  |
| --        | chr1 | 229996767 | C      | A    | -- | -- | IGR    | SNP | 0.483 | 15 | 14 |
| GALNT2    | chr1 | 230349880 | C      | T    | -- | -- | Intron | SNP | 0.385 | 8  | 5  |
| ARV1      | chr1 | 231118580 | G      | T    | -- | -- | Intron | SNP | 0.481 | 14 | 13 |
| ARV1      | chr1 | 231120113 | -      | TGC  | -- | -- | Intron | INS | 0.120 | 21 | 3  |
| FAM89A    | chr1 | 231158938 | A      | T    | -- | -- | Intron | SNP | 0.130 | 20 | 3  |
| --        | chr1 | 231202269 | A      | G    | -- | -- | IGR    | SNP | 0.242 | 25 | 8  |
| --        | chr1 | 231258907 | C      | A    | -- | -- | IGR    | SNP | 0.432 | 25 | 19 |
| --        | chr1 | 231258908 | C      | A    | -- | -- | IGR    | SNP | 0.419 | 25 | 18 |

|             |      |           |     |    |        |        |                 |     |       |    |    |
|-------------|------|-----------|-----|----|--------|--------|-----------------|-----|-------|----|----|
| --          | chr1 | 231428126 | G   | A  | --     | --     | IGR             | SNP | 0.500 | 15 | 15 |
| --          | chr1 | 231495831 | G   | T  | --     | --     | IGR             | SNP | 0.436 | 22 | 17 |
| EGLN1       | chr1 | 231527299 | C   | A  | --     | --     | Intron          | SNP | 0.457 | 19 | 16 |
| TSNAX-DISC  | chr1 | 231675945 | C   | A  | --     | --     | RNA             | SNP | 0.176 | 14 | 3  |
| TSNAX-DISC  | chr1 | 231875824 | A   | G  | --     | --     | RNA             | SNP | 0.595 | 15 | 22 |
| TSNAX-DISC  | chr1 | 232122216 | A   | T  | --     | --     | RNA             | SNP | 0.541 | 17 | 20 |
| TSNAX-DISC  | chr1 | 232136796 | A   | C  | --     | --     | RNA             | SNP | 0.484 | 16 | 15 |
| --          | chr1 | 232309168 | C   | T  | --     | --     | IGR             | SNP | 0.300 | 7  | 3  |
| SIPA1L2     | chr1 | 232557608 | C   | G  | --     | --     | Intron          | SNP | 0.621 | 11 | 18 |
| --          | chr1 | 232754700 | C   | T  | --     | --     | IGR             | SNP | 0.439 | 23 | 18 |
| --          | chr1 | 232808419 | C   | T  | --     | --     | IGR             | SNP | 0.625 | 12 | 20 |
| --          | chr1 | 232824790 | T   | G  | --     | --     | IGR             | SNP | 0.118 | 30 | 4  |
| PCNXL2      | chr1 | 233274028 | C   | A  | --     | --     | Intron          | SNP | 0.476 | 11 | 10 |
| PCNXL2      | chr1 | 233281294 | T   | C  | --     | --     | Intron          | SNP | 0.464 | 15 | 13 |
| KCNK1       | chr1 | 233798302 | A   | C  | --     | --     | Intron          | SNP | 0.424 | 19 | 14 |
| --          | chr1 | 233828569 | C   | A  | --     | --     | IGR             | SNP | 0.222 | 28 | 8  |
| --          | chr1 | 233860254 | C   | T  | --     | --     | IGR             | SNP | 0.563 | 14 | 18 |
| SLC35F3     | chr1 | 234070964 | G   | T  | --     | --     | Intron          | SNP | 0.364 | 7  | 4  |
| SLC35F3     | chr1 | 234198609 | G   | T  | --     | --     | Intron          | SNP | 0.286 | 10 | 4  |
| --          | chr1 | 234928449 | G   | C  | --     | --     | IGR             | SNP | 0.373 | 37 | 22 |
| --          | chr1 | 235015150 | T   | C  | --     | --     | IGR             | SNP | 0.341 | 27 | 14 |
| --          | chr1 | 235025975 | TTC | -  | --     | --     | IGR             | DEL | 0.111 | 24 | 3  |
| LYST        | chr1 | 235838340 | C   | A  | --     | --     | Intron          | SNP | 0.206 | 50 | 13 |
| LYST        | chr1 | 235955392 | C   | T  | G4150A | E1384K | Missense_mutati | SNP | 0.255 | 38 | 13 |
| --          | chr1 | 236070414 | A   | G  | --     | --     | IGR             | SNP | 0.238 | 64 | 20 |
| --          | chr1 | 236814060 | T   | A  | --     | --     | IGR             | SNP | 0.151 | 45 | 8  |
| ACTN2       | chr1 | 236898427 | G   | A  | --     | --     | Intron          | SNP | 0.268 | 41 | 15 |
| --          | chr1 | 237071381 | A   | T  | --     | --     | IGR             | SNP | 0.215 | 51 | 14 |
| --          | chr1 | 237116546 | C   | A  | --     | --     | IGR             | SNP | 0.622 | 28 | 46 |
| RYR2        | chr1 | 237244604 | G   | A  | --     | --     | Intron          | SNP | 0.500 | 4  | 4  |
| RYR2        | chr1 | 237394242 | G   | A  | --     | --     | Intron          | SNP | 0.129 | 27 | 4  |
| RYR2        | chr1 | 237428021 | G   | T  | --     | --     | Intron          | SNP | 0.167 | 15 | 3  |
| RYR2        | chr1 | 237511820 | G   | A  | --     | --     | Intron          | SNP | 0.193 | 46 | 11 |
| RYR2        | chr1 | 237645958 | C   | A  | --     | --     | Intron          | SNP | 0.681 | 23 | 49 |
| RYR2        | chr1 | 237679518 | C   | T  | --     | --     | Intron          | SNP | 0.175 | 33 | 7  |
| RYR2        | chr1 | 237739128 | T   | C  | --     | --     | Intron          | SNP | 0.231 | 30 | 9  |
| RYR2        | chr1 | 237887767 | C   | G  | --     | --     | Intron          | SNP | 0.594 | 13 | 19 |
| RYR2        | chr1 | 237948814 | G   | C  | --     | --     | Intron          | SNP | 0.262 | 45 | 16 |
| LOC10013035 | chr1 | 238053124 | AC  | -  | --     | --     | RNA             | DEL | 0.123 | 64 | 9  |
| --          | chr1 | 238219559 | A   | C  | --     | --     | IGR             | SNP | 0.471 | 9  | 8  |
| --          | chr1 | 238316486 | C   | A  | --     | --     | IGR             | SNP | 0.286 | 30 | 12 |
| --          | chr1 | 238593150 | T   | A  | --     | --     | IGR             | SNP | 0.208 | 38 | 10 |
| --          | chr1 | 238740862 | C   | T  | --     | --     | IGR             | SNP | 0.354 | 31 | 17 |
| --          | chr1 | 238887838 | C   | T  | --     | --     | IGR             | SNP | 0.735 | 13 | 36 |
| --          | chr1 | 238923976 | T   | G  | --     | --     | IGR             | SNP | 0.250 | 27 | 9  |
| --          | chr1 | 238939220 | A   | T  | --     | --     | IGR             | SNP | 0.100 | 36 | 4  |
| --          | chr1 | 239621524 | C   | A  | --     | --     | IGR             | SNP | 0.308 | 27 | 12 |
| --          | chr1 | 239622904 | G   | T  | --     | --     | IGR             | SNP | 0.367 | 31 | 18 |
| CHRM3       | chr1 | 239802058 | G   | T  | --     | --     | Intron          | SNP | 0.200 | 12 | 3  |
| CHRM3       | chr1 | 239880534 | A   | G  | --     | --     | Intron          | SNP | 0.200 | 44 | 11 |
| CHRM3       | chr1 | 239900915 | T   | C  | --     | --     | Intron          | SNP | 0.381 | 26 | 16 |
| CHRM3       | chr1 | 239969347 | G   | T  | --     | --     | Intron          | SNP | 0.482 | 29 | 27 |
| CHRM3       | chr1 | 239973666 | T   | A  | --     | --     | Intron          | SNP | 0.176 | 42 | 9  |
| --          | chr1 | 240097935 | G   | T  | --     | --     | IGR             | SNP | 0.200 | 12 | 3  |
| --          | chr1 | 240164211 | -   | CT | --     | --     | IGR             | INS | 0.460 | 27 | 23 |
| --          | chr1 | 240198543 | C   | T  | --     | --     | IGR             | SNP | 0.250 | 39 | 13 |
| --          | chr1 | 240222155 | A   | C  | --     | --     | IGR             | SNP | 0.133 | 39 | 6  |
| --          | chr1 | 240238630 | C   | A  | --     | --     | IGR             | SNP | 0.197 | 53 | 13 |
| --          | chr1 | 240249469 | C   | T  | --     | --     | IGR             | SNP | 0.225 | 31 | 9  |
| FMN2        | chr1 | 240338628 | C   | A  | --     | --     | Intron          | SNP | 0.619 | 16 | 26 |
| FMN2        | chr1 | 240372837 | A   | C  | --     | --     | Intron          | SNP | 0.720 | 7  | 18 |
| FMN2        | chr1 | 240462269 | G   | T  | --     | --     | Intron          | SNP | 0.129 | 27 | 4  |
| FMN2        | chr1 | 240486615 | C   | A  | --     | --     | Intron          | SNP | 0.255 | 41 | 14 |
| FMN2        | chr1 | 240573025 | G   | C  | --     | --     | Intron          | SNP | 0.581 | 13 | 18 |
| FMN2        | chr1 | 240579601 | C   | T  | --     | --     | Intron          | SNP | 0.158 | 16 | 3  |
| --          | chr1 | 240882774 | T   | C  | --     | --     | IGR             | SNP | 0.200 | 20 | 5  |
| RGS7        | chr1 | 241448429 | C   | G  | --     | --     | Intron          | SNP | 0.140 | 37 | 6  |
| RGS7        | chr1 | 241448441 | A   | G  | --     | --     | Intron          | SNP | 0.233 | 33 | 10 |
| --          | chr1 | 241525111 | C   | A  | --     | --     | IGR             | SNP | 0.318 | 30 | 14 |
| WDR64       | chr1 | 241828149 | C   | G  | --     | --     | Intron          | SNP | 0.213 | 37 | 10 |
| WDR64       | chr1 | 241940682 | G   | A  | --     | --     | Intron          | SNP | 0.379 | 18 | 11 |
| PLD5        | chr1 | 242269553 | C   | T  | --     | --     | Intron          | SNP | 0.250 | 45 | 15 |
| PLD5        | chr1 | 242285155 | A   | G  | --     | --     | Intron          | SNP | 0.136 | 19 | 3  |
| PLD5        | chr1 | 242341642 | G   | T  | --     | --     | Intron          | SNP | 0.338 | 45 | 23 |
| PLD5        | chr1 | 242399638 | C   | T  | --     | --     | Intron          | SNP | 0.511 | 23 | 24 |
| PLD5        | chr1 | 242485316 | C   | A  | --     | --     | Intron          | SNP | 0.138 | 56 | 9  |
| PLD5        | chr1 | 242552315 | C   | G  | --     | --     | Intron          | SNP | 0.167 | 30 | 6  |
| PLD5        | chr1 | 242686742 | C   | A  | --     | --     | Intron          | SNP | 0.264 | 39 | 14 |
| --          | chr1 | 242732811 | G   | T  | --     | --     | IGR             | SNP | 0.650 | 14 | 26 |
| --          | chr1 | 242786480 | T   | A  | --     | --     | IGR             | SNP | 0.288 | 37 | 15 |

|             |      |           |       |   |        |        |                 |     |       |    |    |
|-------------|------|-----------|-------|---|--------|--------|-----------------|-----|-------|----|----|
| --          | chr1 | 242843278 | G     | A | --     | --     | IGR             | SNP | 0.167 | 40 | 8  |
| --          | chr1 | 242862633 | C     | T | --     | --     | IGR             | SNP | 0.773 | 10 | 34 |
| --          | chr1 | 243003690 | T     | A | --     | --     | IGR             | SNP | 0.196 | 45 | 11 |
| --          | chr1 | 243044466 | C     | T | --     | --     | IGR             | SNP | 0.378 | 23 | 14 |
| --          | chr1 | 243175728 | T     | A | --     | --     | IGR             | SNP | 0.222 | 14 | 4  |
| --          | chr1 | 243186220 | -     | - | --     | --     | IGR             | DEL | 0.108 | 33 | 4  |
| --          | chr1 | 243211867 | AGAGA | - | --     | --     | IGR             | DEL | 0.103 | 26 | 3  |
| LOC731275   | chr1 | 243220217 | C     | T | --     | --     | RNA             | SNP | 0.161 | 26 | 5  |
| LOC731275   | chr1 | 243257380 | T     | C | --     | --     | RNA             | SNP | 0.125 | 28 | 4  |
| CEP170      | chr1 | 243403927 | G     | C | --     | --     | Intron          | SNP | 0.244 | 31 | 10 |
| SDCCAG8     | chr1 | 243585492 | G     | A | --     | --     | Intron          | SNP | 0.294 | 48 | 20 |
| --          | chr1 | 244319860 | T     | C | --     | --     | IGR             | SNP | 0.111 | 40 | 5  |
| --          | chr1 | 244382715 | T     | A | --     | --     | IGR             | SNP | 0.203 | 59 | 15 |
| C1orf101    | chr1 | 244752481 | A     | G | --     | --     | Intron          | SNP | 0.786 | 15 | 55 |
| --          | chr1 | 244897340 | C     | T | --     | --     | IGR             | SNP | 0.143 | 42 | 7  |
| --          | chr1 | 244931953 | G     | T | --     | --     | IGR             | SNP | 0.250 | 63 | 21 |
| EFCAB2      | chr1 | 245222667 | T     | G | --     | --     | Intron          | SNP | 0.486 | 19 | 18 |
| KIF26B      | chr1 | 245355207 | A     | T | --     | --     | Intron          | SNP | 0.188 | 26 | 6  |
| KIF26B      | chr1 | 245443667 | C     | A | --     | --     | Intron          | SNP | 0.182 | 27 | 6  |
| KIF26B      | chr1 | 245466316 | G     | A | --     | --     | Intron          | SNP | 0.150 | 17 | 3  |
| KIF26B      | chr1 | 245583086 | G     | A | --     | --     | Intron          | SNP | 0.266 | 47 | 17 |
| KIF26B      | chr1 | 245653331 | C     | G | --     | --     | Intron          | SNP | 0.243 | 56 | 18 |
| SMYD3       | chr1 | 246118529 | G     | C | --     | --     | Intron          | SNP | 0.429 | 28 | 21 |
| SMYD3       | chr1 | 246139251 | T     | C | --     | --     | Intron          | SNP | 0.600 | 4  | 6  |
| SMYD3       | chr1 | 246235642 | G     | T | --     | --     | Intron          | SNP | 0.132 | 66 | 10 |
| SMYD3       | chr1 | 246235643 | C     | T | --     | --     | Intron          | SNP | 0.164 | 61 | 12 |
| SMYD3       | chr1 | 246357509 | C     | T | --     | --     | Intron          | SNP | 0.450 | 33 | 27 |
| SMYD3       | chr1 | 246397256 | A     | T | --     | --     | Intron          | SNP | 0.108 | 66 | 8  |
| SMYD3       | chr1 | 246431194 | T     | A | --     | --     | Intron          | SNP | 0.236 | 42 | 13 |
| SMYD3       | chr1 | 246439748 | C     | T | --     | --     | Intron          | SNP | 0.400 | 27 | 18 |
| SMYD3       | chr1 | 246551477 | TC    | - | --     | --     | Intron          | DEL | 0.125 | 14 | 2  |
| LOC255654   | chr1 | 246685134 | G     | A | --     | --     | RNA             | SNP | 0.143 | 48 | 8  |
| CNST        | chr1 | 246769070 | A     | G | --     | --     | Intron          | SNP | 0.212 | 26 | 7  |
| CNST        | chr1 | 246769071 | G     | C | --     | --     | Intron          | SNP | 0.212 | 26 | 7  |
| --          | chr1 | 246994558 | G     | A | --     | --     | IGR             | SNP | 0.217 | 54 | 15 |
| AHCTF1      | chr1 | 247013711 | G     | C | C5624G | S1875C | Missense_mutati | SNP | 0.242 | 25 | 8  |
| ZNF670-ZNF6 | chr1 | 247214337 | G     | A | --     | --     | RNA             | SNP | 0.205 | 31 | 8  |
| --          | chr1 | 247385455 | C     | T | --     | --     | IGR             | SNP | 0.778 | 14 | 49 |
| --          | chr1 | 247427762 | C     | T | --     | --     | IGR             | SNP | 0.245 | 37 | 12 |
| NLRP3       | chr1 | 247601704 | G     | T | --     | --     | Intron          | SNP | 0.154 | 22 | 4  |
| --          | chr1 | 247776710 | T     | G | --     | --     | IGR             | SNP | 0.200 | 44 | 11 |
| OR13G1      | chr1 | 247837271 | G     | T | --     | --     | 5'Flank         | SNP | 0.260 | 37 | 13 |
| --          | chr1 | 247932289 | A     | G | --     | --     | IGR             | SNP | 0.218 | 43 | 12 |
| --          | chr1 | 248015994 | C     | A | --     | --     | IGR             | SNP | 0.600 | 2  | 3  |
| --          | chr1 | 248329234 | G     | T | --     | --     | IGR             | SNP | 0.229 | 37 | 11 |
| --          | chr1 | 248332116 | AG    | - | --     | --     | IGR             | DEL | 0.211 | 15 | 4  |
| --          | chr1 | 248354375 | T     | G | --     | --     | IGR             | SNP | 0.226 | 41 | 12 |
| --          | chr1 | 248412383 | G     | A | --     | --     | IGR             | SNP | 0.594 | 13 | 19 |
| --          | chr1 | 248450187 | A     | T | --     | --     | IGR             | SNP | 0.233 | 33 | 10 |
| --          | chr1 | 248546395 | A     | G | --     | --     | IGR             | SNP | 0.241 | 22 | 7  |
| --          | chr1 | 248854095 | G     | A | --     | --     | IGR             | SNP | 0.208 | 19 | 5  |
| --          | chr1 | 249059993 | C     | G | --     | --     | IGR             | SNP | 0.250 | 9  | 3  |
| --          | chr1 | 249086224 | C     | G | --     | --     | IGR             | SNP | 0.192 | 80 | 19 |
| --          | chr1 | 249239680 | C     | T | --     | --     | IGR             | SNP | 0.289 | 81 | 33 |
| --          | chr2 | 32270     | G     | T | --     | --     | IGR             | SNP | 0.712 | 15 | 37 |
| --          | chr2 | 398989    | T     | C | --     | --     | IGR             | SNP | 0.412 | 20 | 14 |
| --          | chr2 | 503213    | G     | A | --     | --     | IGR             | SNP | 0.469 | 17 | 15 |
| --          | chr2 | 603278    | A     | C | --     | --     | IGR             | SNP | 0.224 | 38 | 11 |
| LOC339822   | chr2 | 821435    | A     | T | --     | --     | RNA             | SNP | 0.218 | 43 | 12 |
| LOC339822   | chr2 | 861139    | C     | G | --     | --     | RNA             | SNP | 0.229 | 37 | 11 |
| SNTG2       | chr2 | 1091302   | A     | C | --     | --     | Intron          | SNP | 0.164 | 46 | 9  |
| SNTG2       | chr2 | 1102159   | C     | G | --     | --     | Intron          | SNP | 0.105 | 34 | 4  |
| SNTG2       | chr2 | 1102168   | G     | T | --     | --     | Intron          | SNP | 0.129 | 27 | 4  |
| SNTG2       | chr2 | 1219478   | C     | T | --     | --     | Intron          | SNP | 0.211 | 15 | 4  |
| SNTG2       | chr2 | 1226585   | C     | G | --     | --     | Intron          | SNP | 0.128 | 68 | 10 |
| SNTG2       | chr2 | 1320871   | C     | T | --     | --     | Intron          | SNP | 0.172 | 24 | 5  |
| TPO         | chr2 | 1494048   | A     | G | --     | --     | Intron          | SNP | 0.500 | 9  | 9  |
| TPO         | chr2 | 1533188   | G     | C | --     | --     | Intron          | SNP | 0.214 | 11 | 3  |
| --          | chr2 | 1583883   | A     | C | --     | --     | IGR             | SNP | 0.476 | 11 | 10 |
| PXDN        | chr2 | 1645450   | C     | G | --     | --     | Intron          | SNP | 0.250 | 27 | 9  |
| MYT1L       | chr2 | 1832796   | G     | C | --     | --     | Intron          | SNP | 0.125 | 42 | 6  |
| MYT1L       | chr2 | 1875518   | TG    | - | --     | --     | Intron          | DEL | 0.250 | 48 | 16 |
| MYT1L       | chr2 | 1926763   | C     | G | G778C  | E260Q  | Missense_mutati | SNP | 0.643 | 30 | 54 |
| MYT1L       | chr2 | 2017999   | G     | C | --     | --     | Intron          | SNP | 0.692 | 12 | 27 |
| MYT1L       | chr2 | 2038242   | C     | T | --     | --     | Intron          | SNP | 0.186 | 35 | 8  |
| MYT1L       | chr2 | 2103145   | G     | T | --     | --     | Intron          | SNP | 0.276 | 21 | 8  |
| MYT1L       | chr2 | 2202450   | G     | A | --     | --     | Intron          | SNP | 0.686 | 16 | 35 |
| MYT1L       | chr2 | 2267453   | G     | A | --     | --     | Intron          | SNP | 0.228 | 44 | 13 |
| MYT1L       | chr2 | 2275770   | T     | A | --     | --     | Intron          | SNP | 0.226 | 48 | 14 |
| --          | chr2 | 2438122   | G     | C | --     | --     | IGR             | SNP | 0.571 | 9  | 12 |

|           |      |         |     |     |       |       |                 |     |       |    |    |
|-----------|------|---------|-----|-----|-------|-------|-----------------|-----|-------|----|----|
| --        | chr2 | 2439269 | G   | A   | --    | --    | IGR             | SNP | 0.791 | 9  | 34 |
| --        | chr2 | 2503821 | C   | A   | --    | --    | IGR             | SNP | 0.208 | 38 | 10 |
| --        | chr2 | 2593726 | A   | G   | --    | --    | IGR             | SNP | 0.731 | 7  | 19 |
| --        | chr2 | 2600632 | G   | T   | --    | --    | IGR             | SNP | 0.108 | 33 | 4  |
| --        | chr2 | 2642284 | G   | A   | --    | --    | IGR             | SNP | 0.264 | 39 | 14 |
| --        | chr2 | 2739783 | -   | CAG | --    | --    | IGR             | INS | 0.120 | 22 | 3  |
| --        | chr2 | 2739855 | -   | CAG | --    | --    | IGR             | INS | 0.150 | 17 | 3  |
| --        | chr2 | 2744398 | A   | G   | --    | --    | IGR             | SNP | 0.129 | 81 | 12 |
| --        | chr2 | 3125033 | G   | T   | --    | --    | IGR             | SNP | 0.302 | 30 | 13 |
| TSSC1     | chr2 | 3291093 | A   | G   | --    | --    | Intron          | SNP | 0.159 | 37 | 7  |
| TSSC1     | chr2 | 3308244 | C   | T   | --    | --    | Intron          | SNP | 0.135 | 32 | 5  |
| ADI1      | chr2 | 3506241 | G   | T   | --    | --    | Intron          | SNP | 0.286 | 10 | 4  |
| --        | chr2 | 3639522 | C   | T   | --    | --    | IGR             | SNP | 0.154 | 22 | 4  |
| ALLC      | chr2 | 3719899 | A   | G   | --    | --    | Intron          | SNP | 0.161 | 26 | 5  |
| ALLC      | chr2 | 3720958 | G   | C   | --    | --    | Intron          | SNP | 0.761 | 16 | 51 |
| ALLC      | chr2 | 3721081 | G   | T   | --    | --    | Intron          | SNP | 0.711 | 22 | 54 |
| ALLC      | chr2 | 3721262 | G   | A   | --    | --    | Intron          | SNP | 0.754 | 14 | 43 |
| ALLC      | chr2 | 3721285 | G   | A   | --    | --    | Intron          | SNP | 0.667 | 16 | 32 |
| ALLC      | chr2 | 3721357 | G   | A   | --    | --    | Intron          | SNP | 0.636 | 20 | 35 |
| ALLC      | chr2 | 3721446 | G   | C   | --    | --    | Intron          | SNP | 0.368 | 24 | 14 |
| ALLC      | chr2 | 3721468 | G   | A   | --    | --    | Intron          | SNP | 0.485 | 17 | 16 |
| ALLC      | chr2 | 3721476 | G   | T   | --    | --    | Intron          | SNP | 0.500 | 14 | 14 |
| ALLC      | chr2 | 3730632 | G   | A   | G479A | R160K | Missense_mutati | SNP | 0.804 | 9  | 37 |
| --        | chr2 | 3840550 | G   | T   | --    | --    | IGR             | SNP | 0.145 | 47 | 8  |
| --        | chr2 | 4053727 | T   | A   | --    | --    | IGR             | SNP | 0.140 | 37 | 6  |
| --        | chr2 | 4069577 | A   | G   | --    | --    | IGR             | SNP | 0.296 | 38 | 16 |
| --        | chr2 | 4124343 | A   | T   | --    | --    | IGR             | SNP | 0.276 | 42 | 16 |
| --        | chr2 | 4156346 | T   | C   | --    | --    | IGR             | SNP | 0.136 | 38 | 6  |
| --        | chr2 | 4159713 | T   | C   | --    | --    | IGR             | SNP | 0.152 | 28 | 5  |
| --        | chr2 | 4347100 | C   | A   | --    | --    | IGR             | SNP | 0.102 | 44 | 5  |
| --        | chr2 | 4592443 | G   | A   | --    | --    | IGR             | SNP | 0.140 | 49 | 8  |
| --        | chr2 | 4592444 | A   | T   | --    | --    | IGR             | SNP | 0.143 | 48 | 8  |
| --        | chr2 | 4631573 | G   | C   | --    | --    | IGR             | SNP | 0.659 | 14 | 27 |
| --        | chr2 | 4631574 | G   | A   | --    | --    | IGR             | SNP | 0.675 | 13 | 27 |
| --        | chr2 | 4717741 | T   | A   | --    | --    | IGR             | SNP | 0.146 | 35 | 6  |
| --        | chr2 | 4739969 | A   | G   | --    | --    | IGR             | SNP | 0.640 | 9  | 16 |
| --        | chr2 | 4747112 | A   | C   | --    | --    | IGR             | SNP | 0.200 | 32 | 8  |
| --        | chr2 | 4805801 | G   | T   | --    | --    | IGR             | SNP | 0.267 | 55 | 20 |
| --        | chr2 | 4995587 | C   | A   | --    | --    | IGR             | SNP | 0.195 | 33 | 8  |
| --        | chr2 | 5186386 | G   | C   | --    | --    | IGR             | SNP | 0.184 | 31 | 7  |
| --        | chr2 | 5198067 | G   | T   | --    | --    | IGR             | SNP | 0.262 | 45 | 16 |
| --        | chr2 | 5199458 | G   | A   | --    | --    | IGR             | SNP | 0.481 | 28 | 26 |
| --        | chr2 | 5346561 | G   | C   | --    | --    | IGR             | SNP | 0.143 | 36 | 6  |
| --        | chr2 | 5671858 | G   | A   | --    | --    | IGR             | SNP | 0.667 | 20 | 40 |
| --        | chr2 | 5784710 | G   | C   | --    | --    | IGR             | SNP | 0.417 | 21 | 15 |
| --        | chr2 | 5789068 | G   | A   | --    | --    | IGR             | SNP | 0.238 | 32 | 10 |
| --        | chr2 | 5791170 | T   | G   | --    | --    | IGR             | SNP | 0.128 | 41 | 6  |
| --        | chr2 | 5827123 | G   | C   | --    | --    | IGR             | SNP | 0.232 | 43 | 13 |
| SOX11     | chr2 | 5837586 | G   | C   | --    | --    | 3'UTR           | SNP | 0.222 | 14 | 4  |
| --        | chr2 | 5850128 | G   | T   | --    | --    | IGR             | SNP | 0.673 | 17 | 35 |
| --        | chr2 | 5883451 | G   | A   | --    | --    | IGR             | SNP | 0.690 | 22 | 49 |
| --        | chr2 | 5884747 | G   | T   | --    | --    | IGR             | SNP | 0.167 | 15 | 3  |
| --        | chr2 | 5897223 | C   | T   | --    | --    | IGR             | SNP | 0.325 | 27 | 13 |
| --        | chr2 | 6026764 | T   | A   | --    | --    | IGR             | SNP | 0.135 | 45 | 7  |
| --        | chr2 | 6235215 | T   | C   | --    | --    | IGR             | SNP | 0.184 | 40 | 9  |
| --        | chr2 | 6235224 | G   | C   | --    | --    | IGR             | SNP | 0.250 | 39 | 13 |
| --        | chr2 | 6303934 | T   | C   | --    | --    | IGR             | SNP | 0.769 | 9  | 30 |
| --        | chr2 | 6540280 | G   | A   | --    | --    | IGR             | SNP | 0.216 | 29 | 8  |
| --        | chr2 | 6581035 | T   | C   | --    | --    | IGR             | SNP | 0.167 | 35 | 7  |
| --        | chr2 | 6669559 | T   | C   | --    | --    | IGR             | SNP | 0.203 | 55 | 14 |
| --        | chr2 | 7524236 | T   | A   | --    | --    | IGR             | SNP | 0.419 | 36 | 26 |
| --        | chr2 | 7732241 | G   | T   | --    | --    | IGR             | SNP | 0.140 | 49 | 8  |
| --        | chr2 | 7866153 | A   | G   | --    | --    | IGR             | SNP | 0.188 | 39 | 9  |
| --        | chr2 | 7948304 | T   | A   | --    | --    | IGR             | SNP | 0.740 | 13 | 37 |
| --        | chr2 | 7948306 | T   | G   | --    | --    | IGR             | SNP | 0.735 | 13 | 36 |
| LINC00299 | chr2 | 8217522 | G   | A   | --    | --    | RNA             | SNP | 0.125 | 28 | 4  |
| LINC00299 | chr2 | 8293920 | T   | A   | --    | --    | RNA             | SNP | 0.636 | 16 | 28 |
| LINC00299 | chr2 | 8419990 | C   | A   | --    | --    | RNA             | SNP | 0.148 | 46 | 8  |
| LINC00299 | chr2 | 8419991 | A   | C   | --    | --    | RNA             | SNP | 0.151 | 45 | 8  |
| --        | chr2 | 8485439 | G   | C   | --    | --    | IGR             | SNP | 0.611 | 28 | 44 |
| --        | chr2 | 8867309 | G   | A   | --    | --    | IGR             | SNP | 0.206 | 50 | 13 |
| MBOAT2    | chr2 | 9076915 | C   | A   | --    | --    | Intron          | SNP | 0.235 | 13 | 4  |
| MBOAT2    | chr2 | 9102806 | CTA | -   | --    | --    | Intron          | DEL | 0.114 | 31 | 4  |
| --        | chr2 | 9183779 | A   | G   | --    | --    | IGR             | SNP | 0.136 | 19 | 3  |
| --        | chr2 | 9219482 | G   | C   | --    | --    | IGR             | SNP | 0.286 | 25 | 10 |
| ASAP2     | chr2 | 9392763 | G   | A   | --    | --    | Intron          | SNP | 0.705 | 13 | 31 |
| ASAP2     | chr2 | 9472555 | T   | G   | --    | --    | Intron          | SNP | 0.178 | 60 | 13 |
| ADAM17    | chr2 | 9695403 | G   | T   | --    | --    | Intron          | SNP | 0.216 | 40 | 11 |
| --        | chr2 | 9715510 | C   | T   | --    | --    | IGR             | SNP | 0.154 | 55 | 10 |
| --        | chr2 | 9963819 | G   | A   | --    | --    | IGR             | SNP | 0.240 | 19 | 6  |

|                 |      |          |     |        |       |       |                 |     |       |    |    |
|-----------------|------|----------|-----|--------|-------|-------|-----------------|-----|-------|----|----|
| --              | chr2 | 10228099 | C   | T      | --    | --    | IGR             | SNP | 0.277 | 34 | 13 |
| <i>C2orf48</i>  | chr2 | 10317371 | -   | CAATAA | --    | --    | Intron          | INS | 0.103 | 26 | 3  |
| <i>HPCAL1</i>   | chr2 | 10515440 | T   | C      | --    | --    | Intron          | SNP | 0.231 | 40 | 12 |
| --              | chr2 | 10653102 | CAT | -      | --    | --    | IGR             | DEL | 0.111 | 16 | 2  |
| --              | chr2 | 10662699 | T   | C      | --    | --    | IGR             | SNP | 0.235 | 13 | 4  |
| --              | chr2 | 10709840 | C   | A      | --    | --    | IGR             | SNP | 0.115 | 46 | 6  |
| <i>NOL10</i>    | chr2 | 10767414 | C   | G      | --    | --    | Intron          | SNP | 0.137 | 44 | 7  |
| --              | chr2 | 10841981 | C   | A      | --    | --    | IGR             | SNP | 0.727 | 12 | 32 |
| --              | chr2 | 11000761 | G   | A      | --    | --    | IGR             | SNP | 0.167 | 55 | 11 |
| --              | chr2 | 11095541 | C   | T      | --    | --    | IGR             | SNP | 0.171 | 58 | 12 |
| --              | chr2 | 11203470 | T   | A      | --    | --    | IGR             | SNP | 0.258 | 23 | 8  |
| --              | chr2 | 11220784 | C   | T      | --    | --    | IGR             | SNP | 0.237 | 58 | 18 |
| --              | chr2 | 11226722 | G   | T      | --    | --    | IGR             | SNP | 0.267 | 11 | 4  |
| <i>FLJ33534</i> | chr2 | 11247248 | C   | T      | --    | --    | RNA             | SNP | 0.694 | 15 | 34 |
| --              | chr2 | 12723993 | C   | A      | --    | --    | IGR             | SNP | 0.132 | 33 | 5  |
| --              | chr2 | 12723994 | T   | C      | --    | --    | IGR             | SNP | 0.128 | 34 | 5  |
| --              | chr2 | 12981202 | T   | C      | --    | --    | IGR             | SNP | 0.247 | 61 | 20 |
| --              | chr2 | 13378535 | G   | A      | --    | --    | IGR             | SNP | 0.125 | 70 | 10 |
| --              | chr2 | 13743010 | T   | C      | --    | --    | IGR             | SNP | 0.556 | 16 | 20 |
| --              | chr2 | 13798378 | T   | A      | --    | --    | IGR             | SNP | 0.683 | 19 | 41 |
| --              | chr2 | 13911621 | TC  | -      | --    | --    | IGR             | DEL | 0.109 | 41 | 5  |
| --              | chr2 | 13971274 | C   | T      | --    | --    | IGR             | SNP | 0.188 | 52 | 12 |
| --              | chr2 | 14066634 | T   | A      | --    | --    | IGR             | SNP | 0.241 | 41 | 13 |
| --              | chr2 | 14113394 | C   | T      | --    | --    | IGR             | SNP | 0.214 | 11 | 3  |
| --              | chr2 | 14412758 | T   | A      | --    | --    | IGR             | SNP | 0.308 | 36 | 16 |
| --              | chr2 | 14858708 | G   | A      | --    | --    | IGR             | SNP | 0.683 | 20 | 43 |
| --              | chr2 | 14900182 | G   | A      | --    | --    | IGR             | SNP | 0.246 | 43 | 14 |
| --              | chr2 | 15037200 | TTC | -      | --    | --    | IGR             | DEL | 0.125 | 21 | 3  |
| --              | chr2 | 15276651 | A   | T      | --    | --    | IGR             | SNP | 0.224 | 45 | 13 |
| --              | chr2 | 15291564 | T   | C      | --    | --    | IGR             | SNP | 0.310 | 29 | 13 |
| <i>NBAS</i>     | chr2 | 15369499 | G   | A      | --    | --    | Intron          | SNP | 0.182 | 18 | 4  |
| <i>NBAS</i>     | chr2 | 15557075 | G   | C      | --    | --    | Intron          | SNP | 0.167 | 40 | 8  |
| --              | chr2 | 15995540 | G   | C      | --    | --    | IGR             | SNP | 0.195 | 33 | 8  |
| --              | chr2 | 16266252 | C   | T      | --    | --    | IGR             | SNP | 0.124 | 85 | 12 |
| --              | chr2 | 16374615 | C   | G      | --    | --    | IGR             | SNP | 0.478 | 35 | 32 |
| --              | chr2 | 16375696 | G   | C      | --    | --    | IGR             | SNP | 0.299 | 47 | 20 |
| --              | chr2 | 16451937 | T   | C      | --    | --    | IGR             | SNP | 0.480 | 39 | 36 |
| <i>FAM49A</i>   | chr2 | 16745707 | C   | T      | --    | --    | Intron          | SNP | 0.236 | 55 | 17 |
| <i>GEN1</i>     | chr2 | 17941357 | G   | A      | G147A | M49I  | Missense_mutati | SNP | 0.184 | 40 | 9  |
| <i>GEN1</i>     | chr2 | 17952276 | G   | C      | --    | --    | Intron          | SNP | 0.278 | 39 | 15 |
| <i>KCNS3</i>    | chr2 | 18112762 | C   | T      | C487T | R163X | Nonsense_mutat  | SNP | 0.221 | 60 | 17 |
| --              | chr2 | 18267284 | G   | T      | --    | --    | IGR             | SNP | 0.231 | 10 | 3  |
| --              | chr2 | 18285069 | G   | A      | --    | --    | IGR             | SNP | 0.157 | 43 | 8  |
| --              | chr2 | 18599005 | C   | A      | --    | --    | IGR             | SNP | 0.107 | 50 | 6  |
| --              | chr2 | 18720920 | A   | T      | --    | --    | IGR             | SNP | 0.763 | 14 | 45 |
| --              | chr2 | 18857225 | T   | C      | --    | --    | IGR             | SNP | 0.259 | 40 | 14 |
| --              | chr2 | 18864382 | G   | C      | --    | --    | IGR             | SNP | 0.160 | 42 | 8  |
| --              | chr2 | 18910015 | C   | T      | --    | --    | IGR             | SNP | 0.182 | 36 | 8  |
| --              | chr2 | 19177476 | G   | A      | --    | --    | IGR             | SNP | 0.190 | 34 | 8  |
| --              | chr2 | 19227794 | G   | A      | --    | --    | IGR             | SNP | 0.288 | 42 | 17 |
| --              | chr2 | 19977743 | G   | C      | --    | --    | IGR             | SNP | 0.676 | 23 | 48 |
| --              | chr2 | 20017248 | G   | T      | --    | --    | IGR             | SNP | 0.200 | 16 | 4  |
| <i>WDR35</i>    | chr2 | 20179183 | G   | C      | --    | --    | Intron          | SNP | 0.660 | 17 | 33 |
| --              | chr2 | 20692743 | G   | T      | --    | --    | IGR             | SNP | 0.364 | 7  | 4  |
| --              | chr2 | 20792356 | G   | C      | --    | --    | IGR             | SNP | 0.161 | 47 | 9  |
| <i>C2orf43</i>  | chr2 | 20890473 | T   | G      | --    | --    | Intron          | SNP | 0.130 | 40 | 6  |
| --              | chr2 | 21079095 | C   | A      | --    | --    | IGR             | SNP | 0.222 | 77 | 22 |
| --              | chr2 | 21356633 | C   | A      | --    | --    | IGR             | SNP | 0.137 | 44 | 7  |
| --              | chr2 | 21448167 | G   | T      | --    | --    | IGR             | SNP | 0.143 | 36 | 6  |
| --              | chr2 | 21455668 | G   | T      | --    | --    | IGR             | SNP | 0.366 | 26 | 15 |
| --              | chr2 | 21563333 | G   | C      | --    | --    | IGR             | SNP | 0.250 | 12 | 4  |
| --              | chr2 | 21563507 | T   | C      | --    | --    | IGR             | SNP | 0.200 | 16 | 4  |
| --              | chr2 | 21673669 | C   | T      | --    | --    | IGR             | SNP | 0.190 | 34 | 8  |
| --              | chr2 | 21721818 | T   | C      | --    | --    | IGR             | SNP | 0.250 | 39 | 13 |
| --              | chr2 | 21862603 | A   | G      | --    | --    | IGR             | SNP | 0.157 | 59 | 11 |
| --              | chr2 | 22140452 | T   | A      | --    | --    | IGR             | SNP | 0.279 | 31 | 12 |
| --              | chr2 | 22245804 | T   | C      | --    | --    | IGR             | SNP | 0.400 | 27 | 18 |
| --              | chr2 | 22353117 | C   | A      | --    | --    | IGR             | SNP | 0.233 | 23 | 7  |
| --              | chr2 | 22422714 | T   | A      | --    | --    | IGR             | SNP | 0.108 | 33 | 4  |
| --              | chr2 | 22581663 | T   | A      | --    | --    | IGR             | SNP | 0.154 | 66 | 12 |
| --              | chr2 | 22727984 | GC  | -      | --    | --    | IGR             | DEL | 0.200 | 36 | 9  |
| --              | chr2 | 22728481 | A   | G      | --    | --    | IGR             | SNP | 0.184 | 31 | 7  |
| --              | chr2 | 22855541 | T   | A      | --    | --    | IGR             | SNP | 0.194 | 25 | 6  |
| --              | chr2 | 23025418 | G   | A      | --    | --    | IGR             | SNP | 0.720 | 14 | 36 |
| --              | chr2 | 23066462 | G   | C      | --    | --    | IGR             | SNP | 0.778 | 10 | 35 |
| --              | chr2 | 23081904 | G   | T      | --    | --    | IGR             | SNP | 0.281 | 41 | 16 |
| --              | chr2 | 23141048 | G   | T      | --    | --    | IGR             | SNP | 0.208 | 57 | 15 |
| --              | chr2 | 23197263 | T   | C      | --    | --    | IGR             | SNP | 0.167 | 60 | 12 |
| --              | chr2 | 23279486 | C   | A      | --    | --    | IGR             | SNP | 0.152 | 39 | 7  |
| --              | chr2 | 23279487 | T   | C      | --    | --    | IGR             | SNP | 0.149 | 40 | 7  |

|           |      |          |       |    |    |    |         |     |       |    |    |
|-----------|------|----------|-------|----|----|----|---------|-----|-------|----|----|
| --        | chr2 | 23336586 | G     | C  | -- | -- | IGR     | SNP | 0.761 | 11 | 35 |
| --        | chr2 | 23558098 | A     | G  | -- | -- | IGR     | SNP | 0.162 | 31 | 6  |
| KLHL29    | chr2 | 23661789 | T     | C  | -- | -- | Intron  | SNP | 0.571 | 3  | 4  |
| KLHL29    | chr2 | 23661805 | G     | T  | -- | -- | Intron  | SNP | 0.571 | 3  | 4  |
| ATAD2B    | chr2 | 24116537 | C     | T  | -- | -- | Intron  | SNP | 0.222 | 28 | 8  |
| MFS2B     | chr2 | 24241719 | C     | T  | -- | -- | Intron  | SNP | 0.174 | 19 | 4  |
| LOC375190 | chr2 | 24361186 | C     | T  | -- | -- | Intron  | SNP | 0.203 | 51 | 13 |
| ITSN2     | chr2 | 24459737 | TA    | -  | -- | -- | Intron  | DEL | 0.139 | 31 | 5  |
| ITSN2     | chr2 | 24583329 | T     | C  | -- | -- | 5'UTR   | SNP | 0.792 | 5  | 19 |
| EFR3B     | chr2 | 25303152 | C     | T  | -- | -- | Intron  | SNP | 0.400 | 12 | 8  |
| DNMT3A    | chr2 | 25509994 | T     | C  | -- | -- | Intron  | SNP | 0.306 | 50 | 22 |
| DTNB      | chr2 | 25607757 | -     | TC | -- | -- | Intron  | INS | 0.268 | 29 | 11 |
| --        | chr2 | 26243934 | AG    | -  | -- | -- | IGR     | DEL | 0.129 | 27 | 4  |
| --        | chr2 | 26517574 | A     | C  | -- | -- | IGR     | SNP | 0.172 | 48 | 10 |
| CCDC164   | chr2 | 26644327 | A     | T  | -- | -- | Intron  | SNP | 0.143 | 48 | 8  |
| CIB4      | chr2 | 26816190 | G     | A  | -- | -- | Intron  | SNP | 0.182 | 36 | 8  |
| KCNK3     | chr2 | 26947117 | T     | A  | -- | -- | Intron  | SNP | 0.162 | 57 | 11 |
| --        | chr2 | 26961467 | G     | T  | -- | -- | IGR     | SNP | 0.438 | 41 | 32 |
| --        | chr2 | 26966084 | A     | G  | -- | -- | IGR     | SNP | 0.614 | 22 | 35 |
| --        | chr2 | 27177810 | G     | A  | -- | -- | IGR     | SNP | 0.231 | 40 | 12 |
| --        | chr2 | 27181483 | A     | G  | -- | -- | IGR     | SNP | 0.447 | 26 | 21 |
| --        | chr2 | 27966858 | G     | A  | -- | -- | IGR     | SNP | 0.125 | 28 | 4  |
| BRE       | chr2 | 28400573 | AC    | -  | -- | -- | Intron  | DEL | 0.105 | 51 | 6  |
| BRE       | chr2 | 28424996 | G     | C  | -- | -- | Intron  | SNP | 0.724 | 16 | 42 |
| --        | chr2 | 28880641 | C     | T  | -- | -- | IGR     | SNP | 0.292 | 46 | 19 |
| --        | chr2 | 28929652 | T     | C  | -- | -- | IGR     | SNP | 0.161 | 26 | 5  |
| C2orf71   | chr2 | 29289118 | T     | G  | -- | -- | Intron  | SNP | 0.132 | 66 | 10 |
| --        | chr2 | 29337115 | T     | G  | -- | -- | IGR     | SNP | 0.176 | 61 | 13 |
| ALK       | chr2 | 29606262 | G     | A  | -- | -- | Intron  | SNP | 0.583 | 20 | 28 |
| ALK       | chr2 | 29668940 | G     | T  | -- | -- | Intron  | SNP | 0.222 | 14 | 4  |
| ALK       | chr2 | 29728486 | T     | C  | -- | -- | Intron  | SNP | 0.192 | 42 | 10 |
| ALK       | chr2 | 29909005 | G     | T  | -- | -- | Intron  | SNP | 0.228 | 44 | 13 |
| ALK       | chr2 | 29938060 | G     | A  | -- | -- | Intron  | SNP | 0.175 | 52 | 11 |
| ALK       | chr2 | 30113231 | T     | G  | -- | -- | Intron  | SNP | 0.621 | 22 | 36 |
| ALK       | chr2 | 30132145 | G     | A  | -- | -- | Intron  | SNP | 0.154 | 44 | 8  |
| --        | chr2 | 30176192 | G     | A  | -- | -- | IGR     | SNP | 0.702 | 14 | 33 |
| --        | chr2 | 31097406 | C     | A  | -- | -- | IGR     | SNP | 0.190 | 51 | 12 |
| --        | chr2 | 31097407 | C     | T  | -- | -- | IGR     | SNP | 0.194 | 50 | 12 |
| --        | chr2 | 31377477 | G     | T  | -- | -- | IGR     | SNP | 0.160 | 21 | 4  |
| --        | chr2 | 31511252 | G     | C  | -- | -- | IGR     | SNP | 0.557 | 31 | 39 |
| --        | chr2 | 31871235 | GCA   | -  | -- | -- | IGR     | DEL | 0.102 | 53 | 6  |
| --        | chr2 | 32079388 | A     | C  | -- | -- | IGR     | SNP | 0.256 | 32 | 11 |
| MEMO1     | chr2 | 32140052 | G     | A  | -- | -- | Intron  | SNP | 0.133 | 26 | 4  |
| MEMO1     | chr2 | 32151164 | G     | A  | -- | -- | Intron  | SNP | 0.228 | 44 | 13 |
| MEMO1     | chr2 | 32178435 | C     | A  | -- | -- | Intron  | SNP | 0.308 | 9  | 4  |
| MEMO1     | chr2 | 32215640 | TC    | -  | -- | -- | Intron  | DEL | 0.125 | 21 | 3  |
| SPAST     | chr2 | 32310294 | G     | T  | -- | -- | Intron  | SNP | 0.154 | 22 | 4  |
| SPAST     | chr2 | 32329755 | G     | T  | -- | -- | Intron  | SNP | 0.136 | 19 | 3  |
| SPAST     | chr2 | 32329984 | T     | G  | -- | -- | Intron  | SNP | 0.129 | 27 | 4  |
| NLRC4     | chr2 | 32487089 | G     | T  | -- | -- | Intron  | SNP | 0.525 | 19 | 21 |
| YIPF4     | chr2 | 32502260 | C     | T  | -- | -- | 5'Flank | SNP | 0.234 | 49 | 15 |
| BIRC6     | chr2 | 32671840 | A     | T  | -- | -- | Intron  | SNP | 0.250 | 12 | 4  |
| BIRC6     | chr2 | 32761460 | C     | T  | -- | -- | Intron  | SNP | 0.222 | 14 | 4  |
| BIRC6     | chr2 | 32761479 | T     | C  | -- | -- | Intron  | SNP | 0.200 | 16 | 4  |
| --        | chr2 | 33657863 | A     | T  | -- | -- | IGR     | SNP | 0.676 | 22 | 46 |
| --        | chr2 | 33961246 | C     | T  | -- | -- | IGR     | SNP | 0.698 | 13 | 30 |
| --        | chr2 | 33997387 | C     | G  | -- | -- | IGR     | SNP | 0.220 | 32 | 9  |
| --        | chr2 | 34148311 | T     | A  | -- | -- | IGR     | SNP | 0.500 | 12 | 12 |
| --        | chr2 | 34435496 | G     | T  | -- | -- | IGR     | SNP | 0.273 | 24 | 9  |
| --        | chr2 | 34576942 | A     | G  | -- | -- | IGR     | SNP | 0.660 | 17 | 33 |
| --        | chr2 | 34721956 | TTC   | -  | -- | -- | IGR     | DEL | 0.179 | 23 | 5  |
| --        | chr2 | 34907689 | C     | A  | -- | -- | IGR     | SNP | 0.231 | 20 | 6  |
| --        | chr2 | 35332170 | G     | A  | -- | -- | IGR     | SNP | 0.250 | 18 | 6  |
| --        | chr2 | 35451460 | A     | G  | -- | -- | IGR     | SNP | 0.767 | 10 | 33 |
| --        | chr2 | 35685444 | T     | C  | -- | -- | IGR     | SNP | 0.189 | 30 | 7  |
| --        | chr2 | 35888556 | C     | T  | -- | -- | IGR     | SNP | 0.150 | 34 | 6  |
| --        | chr2 | 36003014 | G     | T  | -- | -- | IGR     | SNP | 0.424 | 19 | 14 |
| --        | chr2 | 36055376 | TTA   | -  | -- | -- | IGR     | DEL | 0.143 | 18 | 3  |
| --        | chr2 | 36088064 | A     | G  | -- | -- | IGR     | SNP | 0.143 | 48 | 8  |
| --        | chr2 | 36410424 | A     | G  | -- | -- | IGR     | SNP | 0.235 | 13 | 4  |
| --        | chr2 | 36411257 | ATATC | -  | -- | -- | IGR     | DEL | 0.128 | 41 | 6  |
| CRIM1     | chr2 | 36702766 | G     | C  | -- | -- | Intron  | SNP | 0.254 | 44 | 15 |
| CRIM1     | chr2 | 36703225 | G     | C  | -- | -- | Intron  | SNP | 0.191 | 38 | 9  |
| CRIM1     | chr2 | 36703229 | G     | A  | -- | -- | Intron  | SNP | 0.205 | 35 | 9  |
| CRIM1     | chr2 | 36703600 | G     | A  | -- | -- | Intron  | SNP | 0.111 | 40 | 5  |
| --        | chr2 | 36893724 | T     | G  | -- | -- | IGR     | SNP | 0.268 | 30 | 11 |
| --        | chr2 | 36893725 | G     | T  | -- | -- | IGR     | SNP | 0.262 | 31 | 11 |
| VIT       | chr2 | 36992987 | A     | G  | -- | -- | Intron  | SNP | 0.123 | 64 | 9  |
| --        | chr2 | 37637759 | C     | A  | -- | -- | IGR     | SNP | 0.246 | 43 | 14 |
| --        | chr2 | 37699365 | G     | T  | -- | -- | IGR     | SNP | 0.132 | 59 | 9  |

|             |      |          |    |   |             |             |                 |     |       |    |    |
|-------------|------|----------|----|---|-------------|-------------|-----------------|-----|-------|----|----|
| --          | chr2 | 37955370 | T  | G | --          | --          | IGR             | SNP | 0.143 | 18 | 3  |
| --          | chr2 | 37965467 | G  | A | --          | --          | IGR             | SNP | 0.200 | 48 | 12 |
| --          | chr2 | 38033175 | G  | C | --          | --          | IGR             | SNP | 0.176 | 14 | 3  |
| FAM82A1     | chr2 | 38201611 | G  | A | --          | --          | Intron          | SNP | 0.263 | 14 | 5  |
| FAM82A1     | chr2 | 38232175 | C  | T | --          | --          | Intron          | SNP | 0.176 | 14 | 3  |
| FAM82A1     | chr2 | 38232184 | T  | G | --          | --          | Intron          | SNP | 0.188 | 13 | 3  |
| --          | chr2 | 38464476 | A  | G | --          | --          | IGR             | SNP | 0.179 | 46 | 10 |
| ATL2        | chr2 | 38530961 | T  | A | --          | --          | Intron          | SNP | 0.145 | 47 | 8  |
| ATL2        | chr2 | 38560742 | G  | T | --          | --          | Intron          | SNP | 0.145 | 47 | 8  |
| ATL2        | chr2 | 38579304 | C  | A | --          | --          | Intron          | SNP | 0.167 | 15 | 3  |
| --          | chr2 | 38770074 | T  | G | --          | --          | IGR             | SNP | 0.188 | 52 | 12 |
| HNRPLL      | chr2 | 38791781 | T  | A | --          | --          | Intron          | SNP | 0.194 | 29 | 7  |
| HNRPLL      | chr2 | 38812877 | C  | A | G455T,G440T | R152M,R147M | Missense_mutati | SNP | 0.123 | 50 | 7  |
| --          | chr2 | 38851092 | G  | C | --          | --          | IGR             | SNP | 0.238 | 32 | 10 |
| --          | chr2 | 38888817 | C  | A | --          | --          | IGR             | SNP | 0.674 | 15 | 31 |
| --          | chr2 | 39018373 | C  | T | --          | --          | IGR             | SNP | 0.156 | 38 | 7  |
| DHX57       | chr2 | 39064767 | G  | A | --          | --          | Intron          | SNP | 0.200 | 16 | 4  |
| DHX57       | chr2 | 39064769 | T  | A | --          | --          | Intron          | SNP | 0.158 | 16 | 3  |
| SOS1        | chr2 | 39259080 | A  | T | --          | --          | Intron          | SNP | 0.694 | 11 | 25 |
| SOS1        | chr2 | 39340716 | G  | A | --          | --          | Intron          | SNP | 0.682 | 7  | 15 |
| --          | chr2 | 39368656 | G  | C | --          | --          | IGR             | SNP | 0.216 | 40 | 11 |
| MAP4K3      | chr2 | 39574111 | G  | C | --          | --          | Intron          | SNP | 0.119 | 37 | 5  |
| MAP4K3      | chr2 | 39604154 | T  | A | --          | --          | Intron          | SNP | 0.500 | 21 | 21 |
| TMEM178     | chr2 | 39905454 | A  | T | --          | --          | Intron          | SNP | 0.370 | 46 | 27 |
| LOC10012855 | chr2 | 40272957 | T  | A | --          | --          | RNA             | SNP | 0.291 | 39 | 16 |
| LOC10012855 | chr2 | 40303240 | C  | T | --          | --          | RNA             | SNP | 0.243 | 28 | 9  |
| SLC8A1      | chr2 | 40685287 | T  | C | --          | --          | Intron          | SNP | 0.698 | 13 | 30 |
| SLC8A1      | chr2 | 40705601 | C  | A | --          | --          | Intron          | SNP | 0.235 | 39 | 12 |
| --          | chr2 | 40946733 | T  | A | --          | --          | IGR             | SNP | 0.259 | 40 | 14 |
| --          | chr2 | 41028573 | A  | C | --          | --          | IGR             | SNP | 0.250 | 12 | 4  |
| --          | chr2 | 41110781 | G  | C | --          | --          | IGR             | SNP | 0.709 | 16 | 39 |
| --          | chr2 | 41315806 | G  | A | --          | --          | IGR             | SNP | 0.647 | 6  | 11 |
| --          | chr2 | 41367464 | C  | T | --          | --          | IGR             | SNP | 0.119 | 37 | 5  |
| --          | chr2 | 41396875 | A  | C | --          | --          | IGR             | SNP | 0.469 | 26 | 23 |
| --          | chr2 | 41528928 | A  | T | --          | --          | IGR             | SNP | 0.490 | 25 | 24 |
| --          | chr2 | 41629948 | G  | A | --          | --          | IGR             | SNP | 0.708 | 14 | 34 |
| --          | chr2 | 41918877 | A  | T | --          | --          | IGR             | SNP | 0.220 | 46 | 13 |
| --          | chr2 | 41924681 | C  | T | --          | --          | IGR             | SNP | 0.109 | 57 | 7  |
| --          | chr2 | 42072211 | AG | - | --          | --          | IGR             | DEL | 0.532 | 22 | 25 |
| --          | chr2 | 42133237 | T  | A | --          | --          | IGR             | SNP | 0.388 | 41 | 26 |
| EML4        | chr2 | 42548107 | G  | C | --          | --          | Intron          | SNP | 0.407 | 32 | 22 |
| EML4        | chr2 | 42548300 | G  | A | --          | --          | Intron          | SNP | 0.423 | 15 | 11 |
| --          | chr2 | 42753340 | C  | T | --          | --          | IGR             | SNP | 0.200 | 36 | 9  |
| MTA3        | chr2 | 42920179 | G  | A | --          | --          | Intron          | SNP | 0.630 | 20 | 34 |
| THADA       | chr2 | 43720159 | C  | A | --          | --          | Intron          | SNP | 0.214 | 44 | 12 |
| THADA       | chr2 | 43774462 | TG | - | --          | --          | Intron          | DEL | 0.158 | 16 | 3  |
| --          | chr2 | 45030092 | G  | A | --          | --          | IGR             | SNP | 0.723 | 13 | 34 |
| --          | chr2 | 45598819 | C  | A | --          | --          | IGR             | SNP | 0.267 | 22 | 8  |
| PRKCE       | chr2 | 46206954 | G  | A | --          | --          | Intron          | SNP | 0.109 | 41 | 5  |
| PRKCE       | chr2 | 46327765 | G  | C | --          | --          | Intron          | SNP | 0.692 | 16 | 36 |
| --          | chr2 | 46445495 | C  | T | --          | --          | IGR             | SNP | 0.220 | 39 | 11 |
| --          | chr2 | 46498828 | TC | - | --          | --          | IGR             | DEL | 0.103 | 35 | 4  |
| --          | chr2 | 46680205 | G  | C | --          | --          | IGR             | SNP | 0.739 | 12 | 34 |
| LOC388946   | chr2 | 46710538 | G  | C | --          | --          | Intron          | SNP | 0.854 | 7  | 41 |
| --          | chr2 | 46737627 | A  | G | --          | --          | IGR             | SNP | 0.313 | 11 | 5  |
| TTC7A       | chr2 | 47259289 | A  | T | --          | --          | Intron          | SNP | 0.138 | 69 | 11 |
| --          | chr2 | 47439947 | C  | G | --          | --          | IGR             | SNP | 0.111 | 32 | 4  |
| EPCAM       | chr2 | 47605438 | C  | T | --          | --          | Intron          | SNP | 0.118 | 30 | 4  |
| --          | chr2 | 47892730 | G  | T | --          | --          | IGR             | SNP | 0.211 | 15 | 4  |
| --          | chr2 | 47928349 | TA | - | --          | --          | IGR             | DEL | 0.120 | 22 | 3  |
| --          | chr2 | 47959033 | C  | A | --          | --          | IGR             | SNP | 0.364 | 7  | 4  |
| --          | chr2 | 47986913 | C  | A | --          | --          | IGR             | SNP | 0.192 | 21 | 5  |
| FBXO11      | chr2 | 48102030 | G  | A | --          | --          | Intron          | SNP | 0.160 | 21 | 4  |
| --          | chr2 | 48175508 | C  | T | --          | --          | IGR             | SNP | 0.604 | 21 | 32 |
| --          | chr2 | 48188667 | T  | A | --          | --          | IGR             | SNP | 0.319 | 32 | 15 |
| --          | chr2 | 48200144 | A  | G | --          | --          | IGR             | SNP | 0.619 | 16 | 26 |
| --          | chr2 | 48200165 | G  | A | --          | --          | IGR             | SNP | 0.591 | 18 | 26 |
| --          | chr2 | 48234034 | A  | T | --          | --          | IGR             | SNP | 0.143 | 42 | 7  |
| --          | chr2 | 48274166 | C  | T | --          | --          | IGR             | SNP | 0.333 | 34 | 17 |
| FOXN2       | chr2 | 48544734 | C  | T | --          | --          | Intron          | SNP | 0.190 | 17 | 4  |
| LHCGR,STON  | chr2 | 48950916 | G  | T | --          | --          | Intron          | SNP | 0.143 | 36 | 6  |
| LHCGR,STON  | chr2 | 48979684 | TA | - | --          | --          | Intron          | DEL | 0.109 | 41 | 5  |
| --          | chr2 | 49158764 | C  | T | --          | --          | IGR             | SNP | 0.182 | 18 | 4  |
| FSHR        | chr2 | 49309577 | A  | C | --          | --          | Intron          | SNP | 0.150 | 17 | 3  |
| FSHR        | chr2 | 49309617 | G  | A | --          | --          | Intron          | SNP | 0.118 | 30 | 4  |
| FSHR        | chr2 | 49354957 | T  | C | --          | --          | Intron          | SNP | 0.385 | 16 | 10 |
| --          | chr2 | 49423361 | T  | A | --          | --          | IGR             | SNP | 0.386 | 35 | 22 |
| --          | chr2 | 49532312 | T  | C | --          | --          | IGR             | SNP | 0.143 | 24 | 4  |
| --          | chr2 | 49628738 | G  | C | --          | --          | IGR             | SNP | 0.234 | 36 | 11 |
| --          | chr2 | 49660775 | A  | C | --          | --          | IGR             | SNP | 0.200 | 52 | 13 |

|                 |      |          |    |      |       |       |                 |     |       |    |    |
|-----------------|------|----------|----|------|-------|-------|-----------------|-----|-------|----|----|
| --              | chr2 | 49783584 | AT | -    | --    | --    | IGR             | DEL | 0.104 | 43 | 5  |
| --              | chr2 | 49885047 | A  | G    | --    | --    | IGR             | SNP | 0.225 | 31 | 9  |
| --              | chr2 | 50055050 | C  | A    | --    | --    | IGR             | SNP | 0.211 | 56 | 15 |
| <i>NRXN1</i>    | chr2 | 50161085 | G  | A    | --    | --    | Intron          | SNP | 0.671 | 24 | 49 |
| <i>NRXN1</i>    | chr2 | 50177638 | G  | C    | --    | --    | Intron          | SNP | 0.189 | 43 | 10 |
| <i>NRXN1</i>    | chr2 | 50393417 | A  | G    | --    | --    | Intron          | SNP | 0.214 | 22 | 6  |
| <i>NRXN1</i>    | chr2 | 50592799 | T  | G    | --    | --    | Intron          | SNP | 0.224 | 38 | 11 |
| <i>NRXN1</i>    | chr2 | 50615650 | C  | A    | --    | --    | Intron          | SNP | 0.145 | 47 | 8  |
| <i>NRXN1</i>    | chr2 | 50683081 | A  | G    | --    | --    | Intron          | SNP | 0.776 | 11 | 38 |
| <i>NRXN1</i>    | chr2 | 50685845 | G  | A    | --    | --    | Intron          | SNP | 0.170 | 39 | 8  |
| <i>NRXN1</i>    | chr2 | 50952142 | T  | A    | --    | --    | Intron          | SNP | 0.615 | 10 | 16 |
| <i>NRXN1</i>    | chr2 | 51076646 | C  | A    | --    | --    | Intron          | SNP | 0.273 | 16 | 6  |
| <i>NRXN1</i>    | chr2 | 51139522 | T  | G    | --    | --    | Intron          | SNP | 0.240 | 19 | 6  |
| <i>NRXN1</i>    | chr2 | 51254853 | C  | T    | G559A | V187M | Missense_mutati | SNP | 0.552 | 30 | 37 |
| --              | chr2 | 51454919 | T  | C    | --    | --    | IGR             | SNP | 0.467 | 16 | 14 |
| --              | chr2 | 51513010 | G  | T    | --    | --    | IGR             | SNP | 0.348 | 15 | 8  |
| --              | chr2 | 51719722 | AG | -    | --    | --    | IGR             | DEL | 0.600 | 12 | 18 |
| --              | chr2 | 51722284 | G  | A    | --    | --    | IGR             | SNP | 0.267 | 11 | 4  |
| --              | chr2 | 51815933 | C  | T    | --    | --    | IGR             | SNP | 0.267 | 22 | 8  |
| --              | chr2 | 51820488 | A  | C    | --    | --    | IGR             | SNP | 0.238 | 32 | 10 |
| --              | chr2 | 52206334 | C  | T    | --    | --    | IGR             | SNP | 0.355 | 20 | 11 |
| --              | chr2 | 52535289 | T  | C    | --    | --    | IGR             | SNP | 0.576 | 14 | 19 |
| --              | chr2 | 52537928 | A  | T    | --    | --    | IGR             | SNP | 0.333 | 8  | 4  |
| --              | chr2 | 52816945 | G  | T    | --    | --    | IGR             | SNP | 0.360 | 16 | 9  |
| --              | chr2 | 53157680 | C  | T    | --    | --    | IGR             | SNP | 0.250 | 33 | 11 |
| --              | chr2 | 53323470 | C  | A    | --    | --    | IGR             | SNP | 0.149 | 40 | 7  |
| --              | chr2 | 53332013 | C  | A    | --    | --    | IGR             | SNP | 0.333 | 26 | 13 |
| --              | chr2 | 53352888 | T  | C    | --    | --    | IGR             | SNP | 0.750 | 10 | 30 |
| --              | chr2 | 53487043 | G  | C    | --    | --    | IGR             | SNP | 0.180 | 41 | 9  |
| --              | chr2 | 53555836 | G  | A    | --    | --    | IGR             | SNP | 0.735 | 13 | 36 |
| --              | chr2 | 53681296 | C  | T    | --    | --    | IGR             | SNP | 0.283 | 43 | 17 |
| --              | chr2 | 53681454 | G  | T    | --    | --    | IGR             | SNP | 0.219 | 57 | 16 |
| --              | chr2 | 53727615 | T  | A    | --    | --    | IGR             | SNP | 0.250 | 54 | 18 |
| --              | chr2 | 53735493 | A  | G    | --    | --    | IGR             | SNP | 0.180 | 41 | 9  |
| --              | chr2 | 53791555 | A  | C    | --    | --    | IGR             | SNP | 0.117 | 53 | 7  |
| --              | chr2 | 53847610 | A  | T    | --    | --    | IGR             | SNP | 0.111 | 40 | 5  |
| --              | chr2 | 53877457 | T  | A    | --    | --    | IGR             | SNP | 0.167 | 25 | 5  |
| <i>PSME4</i>    | chr2 | 54160855 | G  | C    | --    | --    | Intron          | SNP | 0.769 | 12 | 40 |
| <i>ACYP2</i>    | chr2 | 54418352 | A  | T    | --    | --    | Intron          | SNP | 0.200 | 52 | 13 |
| --              | chr2 | 54651463 | A  | C    | --    | --    | IGR             | SNP | 0.143 | 36 | 6  |
| <i>SPTBN1</i>   | chr2 | 54701787 | G  | A    | --    | --    | Intron          | SNP | 0.239 | 35 | 11 |
| <i>SPTBN1</i>   | chr2 | 54717546 | G  | A    | --    | --    | Intron          | SNP | 0.741 | 14 | 40 |
| <i>SPTBN1</i>   | chr2 | 54717797 | G  | C    | --    | --    | Intron          | SNP | 0.776 | 11 | 38 |
| <i>SPTBN1</i>   | chr2 | 54717946 | G  | C    | --    | --    | Intron          | SNP | 0.765 | 12 | 39 |
| <i>SPTBN1</i>   | chr2 | 54749213 | A  | T    | --    | --    | Intron          | SNP | 0.111 | 40 | 5  |
| <i>SPTBN1</i>   | chr2 | 54760533 | C  | G    | --    | --    | Intron          | SNP | 0.115 | 46 | 6  |
| <i>EML6</i>     | chr2 | 55177528 | G  | T    | --    | --    | Intron          | SNP | 0.172 | 48 | 10 |
| <i>C2orf63</i>  | chr2 | 55457420 | G  | T    | --    | --    | Intron          | SNP | 0.143 | 48 | 8  |
| <i>PRORS1P</i>  | chr2 | 55508780 | G  | C    | --    | --    | 5'Flank         | SNP | 0.740 | 13 | 37 |
| --              | chr2 | 55666430 | C  | A    | --    | --    | IGR             | SNP | 0.333 | 22 | 11 |
| <i>CCDC104</i>  | chr2 | 55748606 | A  | C    | --    | --    | Intron          | SNP | 0.750 | 15 | 45 |
| --              | chr2 | 55945118 | C  | G    | --    | --    | IGR             | SNP | 0.805 | 8  | 33 |
| --              | chr2 | 55959931 | C  | A    | --    | --    | IGR             | SNP | 0.162 | 31 | 6  |
| --              | chr2 | 56019656 | C  | T    | --    | --    | IGR             | SNP | 0.176 | 14 | 3  |
| --              | chr2 | 56032266 | T  | C    | --    | --    | IGR             | SNP | 0.275 | 29 | 11 |
| --              | chr2 | 56046406 | T  | A    | --    | --    | IGR             | SNP | 0.813 | 3  | 13 |
| --              | chr2 | 56292112 | G  | T    | --    | --    | IGR             | SNP | 0.255 | 38 | 13 |
| --              | chr2 | 56380548 | C  | G    | --    | --    | IGR             | SNP | 0.171 | 34 | 7  |
| <i>CCDC85A</i>  | chr2 | 56514673 | A  | T    | --    | --    | Intron          | SNP | 0.178 | 37 | 8  |
| <i>CCDC85A</i>  | chr2 | 56564054 | A  | G    | --    | --    | Intron          | SNP | 0.227 | 34 | 10 |
| --              | chr2 | 56655641 | C  | T    | --    | --    | IGR             | SNP | 0.444 | 5  | 4  |
| --              | chr2 | 56996575 | G  | T    | --    | --    | IGR             | SNP | 0.207 | 46 | 12 |
| --              | chr2 | 57003309 | C  | T    | --    | --    | IGR             | SNP | 0.130 | 20 | 3  |
| --              | chr2 | 57003328 | C  | T    | --    | --    | IGR             | SNP | 0.143 | 18 | 3  |
| --              | chr2 | 57154832 | C  | A    | --    | --    | IGR             | SNP | 0.214 | 33 | 9  |
| --              | chr2 | 57264499 | C  | A    | --    | --    | IGR             | SNP | 0.282 | 28 | 11 |
| --              | chr2 | 57361675 | T  | A    | --    | --    | IGR             | SNP | 0.327 | 33 | 16 |
| --              | chr2 | 57399705 | -  | TATA | --    | --    | IGR             | INS | 0.150 | 17 | 3  |
| --              | chr2 | 57431256 | A  | T    | --    | --    | IGR             | SNP | 0.200 | 16 | 4  |
| --              | chr2 | 57441542 | G  | C    | --    | --    | IGR             | SNP | 0.304 | 32 | 14 |
| --              | chr2 | 57474803 | T  | C    | --    | --    | IGR             | SNP | 0.176 | 28 | 6  |
| --              | chr2 | 57635331 | C  | G    | --    | --    | IGR             | SNP | 0.636 | 24 | 42 |
| --              | chr2 | 57648859 | C  | A    | --    | --    | IGR             | SNP | 0.125 | 21 | 3  |
| --              | chr2 | 57796456 | C  | A    | --    | --    | IGR             | SNP | 0.685 | 17 | 37 |
| --              | chr2 | 57890293 | C  | A    | --    | --    | IGR             | SNP | 0.158 | 16 | 3  |
| --              | chr2 | 58245385 | C  | T    | --    | --    | IGR             | SNP | 0.283 | 33 | 13 |
| <i>FANCL</i>    | chr2 | 58406587 | T  | C    | --    | --    | Intron          | SNP | 0.630 | 10 | 17 |
| --              | chr2 | 58501355 | G  | A    | --    | --    | IGR             | SNP | 0.288 | 37 | 15 |
| <i>FLJ30838</i> | chr2 | 58764719 | C  | A    | --    | --    | RNA             | SNP | 0.310 | 40 | 18 |
| <i>FLJ30838</i> | chr2 | 58990490 | G  | C    | --    | --    | RNA             | SNP | 0.200 | 40 | 10 |



|            |      |          |      |   |        |       |                |     |       |    |    |
|------------|------|----------|------|---|--------|-------|----------------|-----|-------|----|----|
| FLJ30838   | chr2 | 59119679 | A    | T | --     | --    | RNA            | SNP | 0.246 | 49 | 16 |
| FLJ30838   | chr2 | 59186765 | T    | C | --     | --    | RNA            | SNP | 0.135 | 32 | 5  |
| FLJ30838   | chr2 | 59289536 | G    | A | --     | --    | RNA            | SNP | 0.174 | 38 | 8  |
| --         | chr2 | 59429201 | A    | G | --     | --    | IGR            | SNP | 0.742 | 16 | 46 |
| --         | chr2 | 59488419 | T    | G | --     | --    | IGR            | SNP | 0.145 | 47 | 8  |
| --         | chr2 | 59559152 | C    | T | --     | --    | IGR            | SNP | 0.136 | 19 | 3  |
| --         | chr2 | 59559163 | C    | T | --     | --    | IGR            | SNP | 0.143 | 18 | 3  |
| --         | chr2 | 59667202 | C    | A | --     | --    | IGR            | SNP | 0.130 | 20 | 3  |
| --         | chr2 | 59667203 | G    | A | --     | --    | IGR            | SNP | 0.130 | 20 | 3  |
| --         | chr2 | 60229516 | G    | A | --     | --    | IGR            | SNP | 0.684 | 18 | 39 |
| --         | chr2 | 60234565 | T    | A | --     | --    | IGR            | SNP | 0.163 | 41 | 8  |
| --         | chr2 | 60234566 | C    | A | --     | --    | IGR            | SNP | 0.163 | 41 | 8  |
| --         | chr2 | 60234567 | C    | T | --     | --    | IGR            | SNP | 0.143 | 42 | 7  |
| --         | chr2 | 60341729 | C    | A | --     | --    | IGR            | SNP | 0.738 | 17 | 48 |
| --         | chr2 | 60360592 | C    | G | --     | --    | IGR            | SNP | 0.152 | 28 | 5  |
| --         | chr2 | 60372958 | A    | T | --     | --    | IGR            | SNP | 0.152 | 28 | 5  |
| --         | chr2 | 60372965 | A    | G | --     | --    | IGR            | SNP | 0.179 | 23 | 5  |
| --         | chr2 | 60373182 | C    | G | --     | --    | IGR            | SNP | 0.130 | 20 | 3  |
| --         | chr2 | 60383851 | G    | A | --     | --    | IGR            | SNP | 0.319 | 47 | 22 |
| --         | chr2 | 60404170 | G    | C | --     | --    | IGR            | SNP | 0.161 | 47 | 9  |
| BCL11A     | chr2 | 60713061 | G    | A | --     | --    | Intron         | SNP | 0.778 | 14 | 49 |
| --         | chr2 | 60845034 | G    | T | --     | --    | IGR            | SNP | 0.429 | 4  | 3  |
| --         | chr2 | 60914349 | G    | A | --     | --    | IGR            | SNP | 0.114 | 31 | 4  |
| --         | chr2 | 61061344 | T    | A | --     | --    | IGR            | SNP | 0.174 | 57 | 12 |
| REL        | chr2 | 61144682 | G    | T | --     | --    | Intron         | SNP | 0.294 | 12 | 5  |
| PUS10      | chr2 | 61188984 | A    | G | --     | --    | Intron         | SNP | 0.196 | 41 | 10 |
| --         | chr2 | 61283988 | G    | C | --     | --    | IGR            | SNP | 0.175 | 33 | 7  |
| USP34      | chr2 | 61512641 | T    | A | --     | --    | Intron         | SNP | 0.200 | 28 | 7  |
| USP34      | chr2 | 61668276 | A    | T | --     | --    | Intron         | SNP | 0.143 | 24 | 4  |
| XPO1       | chr2 | 61717788 | G    | A | C2011T | Q671X | Nonsense_mutat | SNP | 0.172 | 53 | 11 |
| XPO1       | chr2 | 61734928 | G    | A | --     | --    | Intron         | SNP | 0.148 | 52 | 9  |
| --         | chr2 | 61793620 | C    | T | --     | --    | IGR            | SNP | 0.689 | 14 | 31 |
| --         | chr2 | 61878076 | G    | A | --     | --    | IGR            | SNP | 0.161 | 47 | 9  |
| --         | chr2 | 61882153 | C    | A | --     | --    | IGR            | SNP | 0.200 | 16 | 4  |
| FAM161A    | chr2 | 62081520 | G    | T | --     | --    | 5'Flank        | SNP | 0.738 | 16 | 45 |
| CCT4       | chr2 | 62116337 | C    | T | --     | --    | 5'Flank        | SNP | 0.250 | 12 | 4  |
| COMMD1     | chr2 | 62226620 | A    | T | --     | --    | Intron         | SNP | 0.127 | 48 | 7  |
| COMMD1     | chr2 | 62289814 | A    | T | --     | --    | Intron         | SNP | 0.321 | 36 | 17 |
| COMMD1     | chr2 | 62325528 | G    | C | --     | --    | Intron         | SNP | 0.259 | 20 | 7  |
| --         | chr2 | 62395256 | A    | G | --     | --    | IGR            | SNP | 0.120 | 44 | 6  |
| --         | chr2 | 62545340 | G    | A | --     | --    | IGR            | SNP | 0.448 | 16 | 13 |
| --         | chr2 | 62636214 | G    | A | --     | --    | IGR            | SNP | 0.196 | 45 | 11 |
| --         | chr2 | 62636511 | G    | C | --     | --    | IGR            | SNP | 0.237 | 58 | 18 |
| EHBP1      | chr2 | 63076439 | G    | A | --     | --    | Intron         | SNP | 0.732 | 15 | 41 |
| EHBP1      | chr2 | 63106167 | C    | A | --     | --    | Intron         | SNP | 0.156 | 38 | 7  |
| OTX1       | chr2 | 63279666 | C    | T | --     | --    | Intron         | SNP | 0.673 | 17 | 35 |
| --         | chr2 | 63312395 | G    | C | --     | --    | IGR            | SNP | 0.192 | 63 | 15 |
| MDH1,WDPCC | chr2 | 63815839 | C    | T | --     | --    | 5'UTR          | SNP | 0.302 | 37 | 16 |
| --         | chr2 | 63861457 | G    | A | --     | --    | IGR            | SNP | 0.231 | 40 | 12 |
| --         | chr2 | 64029456 | G    | A | --     | --    | IGR            | SNP | 0.200 | 12 | 3  |
| UGP2       | chr2 | 64073933 | T    | G | --     | --    | Intron         | SNP | 0.721 | 12 | 31 |
| VPS54      | chr2 | 64139946 | T    | A | --     | --    | Intron         | SNP | 0.241 | 41 | 13 |
| VPS54      | chr2 | 64245388 | T    | A | --     | --    | Intron         | SNP | 0.250 | 42 | 14 |
| --         | chr2 | 64249938 | G    | C | --     | --    | IGR            | SNP | 0.701 | 20 | 47 |
| --         | chr2 | 64269245 | G    | T | --     | --    | IGR            | SNP | 0.125 | 28 | 4  |
| --         | chr2 | 64269248 | G    | T | --     | --    | IGR            | SNP | 0.118 | 30 | 4  |
| LINC00309  | chr2 | 64420956 | C    | T | --     | --    | RNA            | SNP | 0.179 | 69 | 15 |
| --         | chr2 | 64436865 | TTC  | - | --     | --    | IGR            | DEL | 0.129 | 27 | 4  |
| LOC339807  | chr2 | 64843507 | G    | A | --     | --    | RNA            | SNP | 0.227 | 58 | 17 |
| --         | chr2 | 65051471 | G    | T | --     | --    | IGR            | SNP | 0.164 | 51 | 10 |
| CEP68      | chr2 | 65285658 | G    | T | --     | --    | Intron         | SNP | 0.190 | 17 | 4  |
| SPRED2     | chr2 | 65600103 | C    | A | --     | --    | Intron         | SNP | 0.235 | 52 | 16 |
| SPRED2     | chr2 | 65600104 | A    | C | --     | --    | Intron         | SNP | 0.232 | 53 | 16 |
| SPRED2     | chr2 | 65644132 | ACTC | - | --     | --    | Intron         | DEL | 0.200 | 52 | 13 |
| --         | chr2 | 65688302 | C    | T | --     | --    | IGR            | SNP | 0.620 | 27 | 44 |
| --         | chr2 | 65689049 | C    | T | --     | --    | IGR            | SNP | 0.219 | 50 | 14 |
| --         | chr2 | 65700484 | A    | T | --     | --    | IGR            | SNP | 0.179 | 55 | 12 |
| --         | chr2 | 65957061 | C    | T | --     | --    | IGR            | SNP | 0.298 | 33 | 14 |
| --         | chr2 | 65976422 | C    | A | --     | --    | IGR            | SNP | 0.679 | 17 | 36 |
| --         | chr2 | 66159422 | T    | C | --     | --    | IGR            | SNP | 0.707 | 17 | 41 |
| --         | chr2 | 66234229 | G    | A | --     | --    | IGR            | SNP | 0.135 | 45 | 7  |
| --         | chr2 | 66436780 | C    | T | --     | --    | IGR            | SNP | 0.375 | 5  | 3  |
| --         | chr2 | 66529867 | C    | A | --     | --    | IGR            | SNP | 0.256 | 32 | 11 |
| --         | chr2 | 67907564 | G    | T | --     | --    | IGR            | SNP | 0.208 | 38 | 10 |
| --         | chr2 | 67915688 | C    | A | --     | --    | IGR            | SNP | 0.769 | 15 | 50 |
| --         | chr2 | 68156880 | C    | A | --     | --    | IGR            | SNP | 0.813 | 9  | 39 |
| --         | chr2 | 68237005 | G    | A | --     | --    | IGR            | SNP | 0.278 | 13 | 5  |
| --         | chr2 | 68244233 | T    | C | --     | --    | IGR            | SNP | 0.121 | 29 | 4  |
| --         | chr2 | 68244256 | AAC  | - | --     | --    | IGR            | DEL | 0.125 | 35 | 5  |
| --         | chr2 | 68585938 | G    | A | --     | --    | IGR            | SNP | 0.667 | 11 | 22 |

|                  |      |          |       |    |       |       |                 |     |       |    |    |
|------------------|------|----------|-------|----|-------|-------|-----------------|-----|-------|----|----|
| <i>PLEK</i>      | chr2 | 68621279 | T     | G  | T887G | V296G | Missense_mutati | SNP | 0.138 | 56 | 9  |
| <i>PLEK</i>      | chr2 | 68621280 | G     | T  | G888T | V296V | Silent          | SNP | 0.152 | 56 | 10 |
| <i>ARHGAP25</i>  | chr2 | 68983887 | T     | A  | --    | --    | Intron          | SNP | 0.213 | 37 | 10 |
| --               | chr2 | 69139124 | G     | T  | --    | --    | IGR             | SNP | 0.176 | 56 | 12 |
| --               | chr2 | 69235022 | G     | A  | --    | --    | IGR             | SNP | 0.118 | 75 | 10 |
| <i>ANTXR1</i>    | chr2 | 69436986 | A     | T  | --    | --    | Intron          | SNP | 0.143 | 54 | 9  |
| --               | chr2 | 69522647 | T     | C  | --    | --    | IGR             | SNP | 0.135 | 32 | 5  |
| --               | chr2 | 69676064 | C     | A  | --    | --    | IGR             | SNP | 0.186 | 48 | 11 |
| <i>AAK1</i>      | chr2 | 69779840 | C     | T  | --    | --    | Intron          | SNP | 0.116 | 38 | 5  |
| --               | chr2 | 69890118 | C     | T  | --    | --    | IGR             | SNP | 0.167 | 20 | 4  |
| --               | chr2 | 69957316 | T     | A  | --    | --    | IGR             | SNP | 0.667 | 7  | 14 |
| <i>PCBP1-AS1</i> | chr2 | 70206696 | C     | A  | --    | --    | RNA             | SNP | 0.226 | 48 | 14 |
| <i>PCBP1-AS1</i> | chr2 | 70255577 | T     | A  | --    | --    | RNA             | SNP | 0.427 | 43 | 32 |
| <i>PCBP1-AS1</i> | chr2 | 70258910 | G     | A  | --    | --    | RNA             | SNP | 0.457 | 38 | 32 |
| --               | chr2 | 70606767 | T     | A  | --    | --    | IGR             | SNP | 0.164 | 56 | 11 |
| --               | chr2 | 70661725 | C     | G  | --    | --    | IGR             | SNP | 0.231 | 10 | 3  |
| --               | chr2 | 70661747 | C     | G  | --    | --    | IGR             | SNP | 0.333 | 8  | 4  |
| --               | chr2 | 71204531 | C     | G  | --    | --    | IGR             | SNP | 0.300 | 28 | 12 |
| --               | chr2 | 71316210 | G     | A  | --    | --    | IGR             | SNP | 0.727 | 3  | 8  |
| --               | chr2 | 71389128 | A     | G  | --    | --    | IGR             | SNP | 0.333 | 6  | 3  |
| <i>ZNF638</i>    | chr2 | 71565792 | A     | G  | --    | --    | Intron          | SNP | 0.804 | 9  | 37 |
| <i>DYSF</i>      | chr2 | 71707515 | GCA   | -  | --    | --    | Intron          | DEL | 0.143 | 30 | 5  |
| --               | chr2 | 71946037 | G     | T  | --    | --    | IGR             | SNP | 0.280 | 36 | 14 |
| --               | chr2 | 72112355 | A     | C  | --    | --    | IGR             | SNP | 0.138 | 25 | 4  |
| --               | chr2 | 72232959 | G     | A  | --    | --    | IGR             | SNP | 0.636 | 16 | 28 |
| <i>EXOC6B</i>    | chr2 | 72583687 | AAACT | -  | --    | --    | Intron          | DEL | 0.457 | 38 | 32 |
| <i>EXOC6B</i>    | chr2 | 72620503 | G     | A  | --    | --    | Intron          | SNP | 0.660 | 16 | 31 |
| <i>EXOC6B</i>    | chr2 | 72688051 | G     | A  | --    | --    | Intron          | SNP | 0.261 | 17 | 6  |
| <i>EXOC6B</i>    | chr2 | 72688081 | C     | A  | --    | --    | Intron          | SNP | 0.353 | 11 | 6  |
| <i>EXOC6B</i>    | chr2 | 72691295 | TG    | -  | --    | --    | Intron          | DEL | 0.667 | 19 | 38 |
| <i>EXOC6B</i>    | chr2 | 72969562 | G     | A  | --    | --    | Intron          | SNP | 0.216 | 40 | 11 |
| <i>RAB11FIP5</i> | chr2 | 73339373 | -     | CA | --    | --    | Intron          | INS | 0.254 | 53 | 18 |
| --               | chr2 | 73352607 | A     | C  | --    | --    | IGR             | SNP | 0.161 | 26 | 5  |
| --               | chr2 | 73397761 | CTG   | -  | --    | --    | IGR             | DEL | 0.105 | 34 | 4  |
| --               | chr2 | 73950802 | G     | C  | --    | --    | IGR             | SNP | 0.217 | 18 | 5  |
| <i>ACTG2</i>     | chr2 | 74126655 | C     | G  | --    | --    | Intron          | SNP | 0.400 | 30 | 20 |
| --               | chr2 | 74351776 | A     | T  | --    | --    | IGR             | SNP | 0.167 | 20 | 4  |
| <i>C2orf81</i>   | chr2 | 74643692 | C     | A  | --    | --    | Intron          | SNP | 0.200 | 16 | 4  |
| <i>DQX1</i>      | chr2 | 74752448 | C     | G  | --    | --    | Intron          | SNP | 0.687 | 21 | 46 |
| <i>DQX1</i>      | chr2 | 74752449 | C     | A  | --    | --    | Intron          | SNP | 0.706 | 20 | 48 |
| <i>SEMA4F</i>    | chr2 | 74887158 | G     | C  | --    | --    | Intron          | SNP | 0.712 | 17 | 42 |
| <i>SEMA4F</i>    | chr2 | 74904190 | G     | A  | --    | --    | Intron          | SNP | 0.325 | 27 | 13 |
| --               | chr2 | 75005760 | G     | T  | --    | --    | IGR             | SNP | 0.219 | 50 | 14 |
| --               | chr2 | 75006464 | G     | C  | --    | --    | IGR             | SNP | 0.130 | 60 | 9  |
| <i>TACR1</i>     | chr2 | 75307554 | G     | A  | --    | --    | Intron          | SNP | 0.483 | 30 | 28 |
| <i>TACR1</i>     | chr2 | 75307600 | T     | A  | --    | --    | Intron          | SNP | 0.519 | 38 | 41 |
| --               | chr2 | 75481642 | C     | T  | --    | --    | IGR             | SNP | 0.159 | 37 | 7  |
| --               | chr2 | 75481643 | A     | T  | --    | --    | IGR             | SNP | 0.152 | 39 | 7  |
| --               | chr2 | 75690479 | C     | A  | --    | --    | IGR             | SNP | 0.205 | 35 | 9  |
| <i>C2orf3</i>    | chr2 | 75932320 | G     | A  | --    | --    | Intron          | SNP | 0.484 | 33 | 31 |
| --               | chr2 | 76062640 | G     | A  | --    | --    | IGR             | SNP | 0.220 | 32 | 9  |
| --               | chr2 | 76351921 | G     | A  | --    | --    | IGR             | SNP | 0.132 | 33 | 5  |
| --               | chr2 | 76367245 | C     | A  | --    | --    | IGR             | SNP | 0.186 | 35 | 8  |
| --               | chr2 | 76374144 | C     | A  | --    | --    | IGR             | SNP | 0.145 | 53 | 9  |
| --               | chr2 | 76374145 | T     | A  | --    | --    | IGR             | SNP | 0.131 | 53 | 8  |
| --               | chr2 | 76492949 | G     | C  | --    | --    | IGR             | SNP | 0.224 | 52 | 15 |
| --               | chr2 | 76517861 | A     | G  | --    | --    | IGR             | SNP | 0.211 | 30 | 8  |
| --               | chr2 | 76642021 | G     | A  | --    | --    | IGR             | SNP | 0.114 | 31 | 4  |
| --               | chr2 | 76940844 | A     | G  | --    | --    | IGR             | SNP | 0.317 | 28 | 13 |
| <i>LRRTM4</i>    | chr2 | 76982243 | C     | A  | --    | --    | Intron          | SNP | 0.158 | 32 | 6  |
| <i>LRRTM4</i>    | chr2 | 77008014 | GT    | -  | --    | --    | Intron          | DEL | 0.138 | 25 | 4  |
| <i>LRRTM4</i>    | chr2 | 77011497 | G     | T  | --    | --    | Intron          | SNP | 0.225 | 31 | 9  |
| <i>LRRTM4</i>    | chr2 | 77036858 | C     | T  | --    | --    | Intron          | SNP | 0.600 | 22 | 33 |
| <i>LRRTM4</i>    | chr2 | 77063559 | C     | A  | --    | --    | Intron          | SNP | 0.200 | 36 | 9  |
| <i>LRRTM4</i>    | chr2 | 77066291 | C     | T  | --    | --    | Intron          | SNP | 0.818 | 8  | 36 |
| <i>LRRTM4</i>    | chr2 | 77089736 | G     | A  | --    | --    | Intron          | SNP | 0.120 | 66 | 9  |
| <i>LRRTM4</i>    | chr2 | 77089737 | A     | T  | --    | --    | Intron          | SNP | 0.105 | 68 | 8  |
| <i>LRRTM4</i>    | chr2 | 77192992 | C     | T  | --    | --    | Intron          | SNP | 0.727 | 12 | 32 |
| <i>LRRTM4</i>    | chr2 | 77214505 | G     | A  | --    | --    | Intron          | SNP | 0.675 | 13 | 27 |
| <i>LRRTM4</i>    | chr2 | 77280088 | G     | A  | --    | --    | Intron          | SNP | 0.140 | 43 | 7  |
| <i>LRRTM4</i>    | chr2 | 77329694 | T     | G  | --    | --    | Intron          | SNP | 0.386 | 35 | 22 |
| <i>LRRTM4</i>    | chr2 | 77336091 | C     | T  | --    | --    | Intron          | SNP | 0.162 | 31 | 6  |
| <i>LRRTM4</i>    | chr2 | 77380576 | T     | A  | --    | --    | Intron          | SNP | 0.353 | 33 | 18 |
| <i>LRRTM4</i>    | chr2 | 77503736 | T     | A  | --    | --    | Intron          | SNP | 0.750 | 4  | 12 |
| <i>LRRTM4</i>    | chr2 | 77577490 | G     | A  | --    | --    | Intron          | SNP | 0.214 | 11 | 3  |
| <i>LRRTM4</i>    | chr2 | 77647750 | GAT   | -  | --    | --    | Intron          | DEL | 0.161 | 26 | 5  |
| --               | chr2 | 77778961 | C     | A  | --    | --    | IGR             | SNP | 0.600 | 12 | 18 |
| --               | chr2 | 77818187 | G     | T  | --    | --    | IGR             | SNP | 0.125 | 42 | 6  |
| --               | chr2 | 77876563 | G     | T  | --    | --    | IGR             | SNP | 0.514 | 17 | 18 |
| --               | chr2 | 78054012 | C     | A  | --    | --    | IGR             | SNP | 0.450 | 22 | 18 |

|         |      |          |     |        |       |       |                 |     |       |    |    |
|---------|------|----------|-----|--------|-------|-------|-----------------|-----|-------|----|----|
| --      | chr2 | 78181033 | -   | GAGGCA | --    | --    | IGR             | INS | 0.103 | 26 | 3  |
| --      | chr2 | 78196791 | C   | T      | --    | --    | IGR             | SNP | 0.105 | 34 | 4  |
| --      | chr2 | 78484936 | C   | A      | --    | --    | IGR             | SNP | 0.162 | 31 | 6  |
| --      | chr2 | 78484941 | C   | A      | --    | --    | IGR             | SNP | 0.162 | 31 | 6  |
| --      | chr2 | 78570824 | G   | A      | --    | --    | IGR             | SNP | 0.297 | 45 | 19 |
| --      | chr2 | 78573127 | C   | A      | --    | --    | IGR             | SNP | 0.576 | 14 | 19 |
| --      | chr2 | 78681329 | -   | TC     | --    | --    | IGR             | INS | 0.385 | 32 | 20 |
| --      | chr2 | 78753941 | C   | A      | --    | --    | IGR             | SNP | 0.211 | 30 | 8  |
| --      | chr2 | 78797445 | A   | T      | --    | --    | IGR             | SNP | 0.226 | 41 | 12 |
| --      | chr2 | 78799816 | A   | G      | --    | --    | IGR             | SNP | 0.467 | 24 | 21 |
| --      | chr2 | 78955212 | C   | T      | --    | --    | IGR             | SNP | 0.689 | 19 | 42 |
| --      | chr2 | 78991861 | C   | A      | --    | --    | IGR             | SNP | 0.345 | 19 | 10 |
| --      | chr2 | 78992819 | T   | A      | --    | --    | IGR             | SNP | 0.214 | 22 | 6  |
| --      | chr2 | 79292489 | G   | C      | --    | --    | IGR             | SNP | 0.636 | 16 | 28 |
| --      | chr2 | 79367057 | G   | C      | --    | --    | IGR             | SNP | 0.100 | 54 | 6  |
| --      | chr2 | 79459605 | G   | T      | --    | --    | IGR             | SNP | 0.172 | 48 | 10 |
| --      | chr2 | 79562625 | A   | T      | --    | --    | IGR             | SNP | 0.292 | 34 | 14 |
| --      | chr2 | 79641478 | G   | C      | --    | --    | IGR             | SNP | 0.609 | 18 | 28 |
| --      | chr2 | 79668857 | A   | G      | --    | --    | IGR             | SNP | 0.646 | 23 | 42 |
| CTNNA2  | chr2 | 79899944 | G   | A      | --    | --    | Intron          | SNP | 0.341 | 27 | 14 |
| CTNNA2  | chr2 | 80010076 | C   | A      | --    | --    | Intron          | SNP | 0.270 | 27 | 10 |
| CTNNA2  | chr2 | 80016038 | C   | T      | --    | --    | Intron          | SNP | 0.682 | 14 | 30 |
| CTNNA2  | chr2 | 80044937 | G   | A      | --    | --    | Intron          | SNP | 0.189 | 43 | 10 |
| CTNNA2  | chr2 | 80118858 | T   | C      | --    | --    | Intron          | SNP | 0.163 | 36 | 7  |
| CTNNA2  | chr2 | 80208254 | G   | T      | --    | --    | Intron          | SNP | 0.205 | 35 | 9  |
| CTNNA2  | chr2 | 80261119 | G   | A      | --    | --    | Intron          | SNP | 0.278 | 13 | 5  |
| CTNNA2  | chr2 | 80307022 | TA  | -      | --    | --    | Intron          | DEL | 0.133 | 13 | 2  |
| CTNNA2  | chr2 | 80382218 | C   | T      | --    | --    | Intron          | SNP | 0.295 | 31 | 13 |
| CTNNA2  | chr2 | 80437612 | G   | C      | --    | --    | Intron          | SNP | 0.400 | 15 | 10 |
| CTNNA2  | chr2 | 80595994 | A   | G      | --    | --    | Intron          | SNP | 0.791 | 9  | 34 |
| CTNNA2  | chr2 | 80641700 | C   | A      | --    | --    | Intron          | SNP | 0.236 | 42 | 13 |
| CTNNA2  | chr2 | 80692860 | G   | T      | --    | --    | Intron          | SNP | 0.167 | 35 | 7  |
| CTNNA2  | chr2 | 80822408 | G   | T      | --    | --    | Intron          | SNP | 0.231 | 40 | 12 |
| CTNNA2  | chr2 | 80829951 | A   | G      | --    | --    | Intron          | SNP | 0.175 | 33 | 7  |
| --      | chr2 | 80920711 | T   | C      | --    | --    | IGR             | SNP | 0.169 | 49 | 10 |
| --      | chr2 | 81006190 | G   | T      | --    | --    | IGR             | SNP | 0.294 | 24 | 10 |
| --      | chr2 | 81098713 | G   | T      | --    | --    | IGR             | SNP | 0.189 | 43 | 10 |
| --      | chr2 | 81185305 | G   | T      | --    | --    | IGR             | SNP | 0.250 | 33 | 11 |
| --      | chr2 | 81378885 | T   | C      | --    | --    | IGR             | SNP | 0.259 | 40 | 14 |
| --      | chr2 | 81421586 | C   | T      | --    | --    | IGR             | SNP | 0.263 | 84 | 30 |
| --      | chr2 | 81487232 | T   | C      | --    | --    | IGR             | SNP | 0.286 | 30 | 12 |
| --      | chr2 | 81571863 | -   | GT     | --    | --    | IGR             | INS | 0.191 | 55 | 13 |
| --      | chr2 | 81602320 | G   | A      | --    | --    | IGR             | SNP | 0.243 | 28 | 9  |
| --      | chr2 | 81602659 | G   | C      | --    | --    | IGR             | SNP | 0.167 | 20 | 4  |
| --      | chr2 | 81710249 | A   | T      | --    | --    | IGR             | SNP | 0.333 | 8  | 4  |
| --      | chr2 | 81846632 | C   | A      | --    | --    | IGR             | SNP | 0.174 | 19 | 4  |
| --      | chr2 | 81863583 | T   | G      | --    | --    | IGR             | SNP | 0.148 | 23 | 4  |
| --      | chr2 | 81993255 | C   | A      | --    | --    | IGR             | SNP | 0.316 | 39 | 18 |
| --      | chr2 | 81993402 | C   | A      | --    | --    | IGR             | SNP | 0.203 | 47 | 12 |
| --      | chr2 | 82051067 | A   | T      | --    | --    | IGR             | SNP | 0.719 | 9  | 23 |
| --      | chr2 | 82052610 | C   | G      | --    | --    | IGR             | SNP | 0.660 | 17 | 33 |
| --      | chr2 | 82162475 | AC  | -      | --    | --    | IGR             | DEL | 0.129 | 27 | 4  |
| --      | chr2 | 82205782 | C   | T      | --    | --    | IGR             | SNP | 0.234 | 49 | 15 |
| --      | chr2 | 82453274 | C   | T      | --    | --    | IGR             | SNP | 0.486 | 19 | 18 |
| --      | chr2 | 82682638 | G   | T      | --    | --    | IGR             | SNP | 0.313 | 22 | 10 |
| --      | chr2 | 82979066 | A   | T      | --    | --    | IGR             | SNP | 0.242 | 25 | 8  |
| --      | chr2 | 83156989 | A   | G      | --    | --    | IGR             | SNP | 0.341 | 29 | 15 |
| --      | chr2 | 83168031 | A   | G      | --    | --    | IGR             | SNP | 0.306 | 25 | 11 |
| --      | chr2 | 83212043 | A   | T      | --    | --    | IGR             | SNP | 0.298 | 33 | 14 |
| --      | chr2 | 83328780 | C   | G      | --    | --    | IGR             | SNP | 0.185 | 44 | 10 |
| --      | chr2 | 83464157 | A   | T      | --    | --    | IGR             | SNP | 0.395 | 26 | 17 |
| --      | chr2 | 83745967 | C   | T      | --    | --    | IGR             | SNP | 0.350 | 26 | 14 |
| --      | chr2 | 84031137 | T   | C      | --    | --    | IGR             | SNP | 0.244 | 31 | 10 |
| --      | chr2 | 84039971 | A   | T      | --    | --    | IGR             | SNP | 0.211 | 30 | 8  |
| --      | chr2 | 84059483 | G   | A      | --    | --    | IGR             | SNP | 0.263 | 28 | 10 |
| --      | chr2 | 84291550 | G   | A      | --    | --    | IGR             | SNP | 0.405 | 25 | 17 |
| --      | chr2 | 84411534 | G   | A      | --    | --    | IGR             | SNP | 0.325 | 27 | 13 |
| SUCLG1  | chr2 | 84652673 | C   | A      | G880T | G294W | Missense_mutati | SNP | 0.235 | 39 | 12 |
| DNAH6   | chr2 | 84823802 | AAC | -      | --    | --    | Intron          | DEL | 0.103 | 35 | 4  |
| DNAH6   | chr2 | 84955241 | C   | A      | --    | --    | Intron          | SNP | 0.225 | 31 | 9  |
| --      | chr2 | 85145005 | T   | A      | --    | --    | IGR             | SNP | 0.245 | 37 | 12 |
| TCF7L1  | chr2 | 85389439 | C   | A      | --    | --    | Intron          | SNP | 0.342 | 25 | 13 |
| TCF7L1  | chr2 | 85533847 | G   | C      | --    | --    | Intron          | SNP | 0.405 | 22 | 15 |
| ELMOD3  | chr2 | 85603903 | G   | A      | --    | --    | Intron          | SNP | 0.140 | 43 | 7  |
| --      | chr2 | 85693981 | C   | G      | --    | --    | IGR             | SNP | 0.235 | 39 | 12 |
| --      | chr2 | 85714944 | C   | T      | --    | --    | IGR             | SNP | 0.222 | 14 | 4  |
| ATOX1   | chr2 | 85991646 | G   | C      | --    | --    | Intron          | SNP | 0.585 | 22 | 31 |
| ST3GAL5 | chr2 | 86070172 | C   | T      | --    | --    | Intron          | SNP | 0.367 | 19 | 11 |
| --      | chr2 | 86214777 | T   | A      | --    | --    | IGR             | SNP | 0.231 | 30 | 9  |
| CD8B    | chr2 | 87084759 | C   | G      | --    | --    | Intron          | SNP | 0.600 | 10 | 15 |

|                   |      |          |       |        |    |    |        |     |       |    |    |
|-------------------|------|----------|-------|--------|----|----|--------|-----|-------|----|----|
| <i>RGPD1</i>      | chr2 | 87153255 | G     | A      | -- | -- | Intron | SNP | 0.119 | 37 | 5  |
| <i>LOC285074</i>  | chr2 | 87281615 | C     | A      | -- | -- | RNA    | SNP | 0.512 | 20 | 21 |
| --                | chr2 | 87584919 | C     | T      | -- | -- | IGR    | SNP | 0.265 | 25 | 9  |
| --                | chr2 | 87591184 | A     | G      | -- | -- | IGR    | SNP | 0.125 | 42 | 6  |
| --                | chr2 | 87601492 | CCTT  | -      | -- | -- | IGR    | DEL | 0.133 | 26 | 4  |
| --                | chr2 | 87615488 | G     | A      | -- | -- | IGR    | SNP | 0.107 | 25 | 3  |
| --                | chr2 | 87623548 | G     | A      | -- | -- | IGR    | SNP | 0.273 | 16 | 6  |
| --                | chr2 | 87634279 | T     | A      | -- | -- | IGR    | SNP | 0.333 | 12 | 6  |
| --                | chr2 | 87639102 | A     | C      | -- | -- | IGR    | SNP | 0.304 | 16 | 7  |
| --                | chr2 | 87640817 | C     | T      | -- | -- | IGR    | SNP | 0.263 | 14 | 5  |
| --                | chr2 | 87643455 | A     | G      | -- | -- | IGR    | SNP | 0.414 | 17 | 12 |
| --                | chr2 | 87643457 | G     | A      | -- | -- | IGR    | SNP | 0.393 | 17 | 11 |
| --                | chr2 | 87656360 | C     | A      | -- | -- | IGR    | SNP | 0.222 | 35 | 10 |
| --                | chr2 | 87656642 | C     | T      | -- | -- | IGR    | SNP | 0.311 | 31 | 14 |
| --                | chr2 | 87719706 | G     | A      | -- | -- | IGR    | SNP | 0.308 | 18 | 8  |
| --                | chr2 | 88043438 | CAT   | -      | -- | -- | IGR    | DEL | 0.105 | 17 | 2  |
| --                | chr2 | 88050091 | C     | T      | -- | -- | IGR    | SNP | 0.100 | 36 | 4  |
| <i>SMYD1</i>      | chr2 | 88392944 | T     | A      | -- | -- | Intron | SNP | 0.276 | 42 | 16 |
| <i>SMYD1</i>      | chr2 | 88392945 | G     | T      | -- | -- | Intron | SNP | 0.276 | 42 | 16 |
| --                | chr2 | 88433469 | C     | A      | -- | -- | IGR    | SNP | 0.213 | 37 | 10 |
| --                | chr2 | 88501267 | -     | GGA    | -- | -- | IGR    | INS | 0.200 | 16 | 4  |
| --                | chr2 | 88632321 | G     | A      | -- | -- | IGR    | SNP | 0.130 | 40 | 6  |
| --                | chr2 | 88743401 | T     | C      | -- | -- | IGR    | SNP | 0.741 | 7  | 20 |
| --                | chr2 | 88853690 | C     | A      | -- | -- | IGR    | SNP | 0.304 | 32 | 14 |
| <i>EIF2AK3</i>    | chr2 | 88915515 | C     | G      | -- | -- | Intron | SNP | 0.178 | 37 | 8  |
| --                | chr2 | 89175530 | G     | T      | -- | -- | IGR    | SNP | 0.121 | 51 | 7  |
| --                | chr2 | 89499881 | G     | T      | -- | -- | IGR    | SNP | 0.419 | 18 | 13 |
| --                | chr2 | 90179364 | T     | A      | -- | -- | IGR    | SNP | 0.194 | 25 | 6  |
| --                | chr2 | 90212344 | A     | G      | -- | -- | IGR    | SNP | 0.206 | 27 | 7  |
| --                | chr2 | 90295118 | -     | GATGAA | -- | -- | IGR    | INS | 0.167 | 35 | 7  |
| --                | chr2 | 90295406 | A     | G      | -- | -- | IGR    | SNP | 0.136 | 89 | 14 |
| --                | chr2 | 90435782 | A     | C      | -- | -- | IGR    | SNP | 0.364 | 7  | 4  |
| --                | chr2 | 90473507 | C     | T      | -- | -- | IGR    | SNP | 0.107 | 75 | 9  |
| --                | chr2 | 90474421 | G     | T      | -- | -- | IGR    | SNP | 0.119 | 37 | 5  |
| --                | chr2 | 90489076 | GCT   | -      | -- | -- | IGR    | DEL | 0.118 | 15 | 2  |
| --                | chr2 | 91604385 | T     | C      | -- | -- | IGR    | SNP | 0.308 | 9  | 4  |
| --                | chr2 | 91605671 | C     | T      | -- | -- | IGR    | SNP | 0.212 | 26 | 7  |
| --                | chr2 | 91605989 | G     | T      | -- | -- | IGR    | SNP | 0.103 | 52 | 6  |
| --                | chr2 | 91647432 | A     | T      | -- | -- | IGR    | SNP | 0.250 | 15 | 5  |
| --                | chr2 | 91651776 | T     | A      | -- | -- | IGR    | SNP | 0.200 | 24 | 6  |
| --                | chr2 | 91975697 | A     | G      | -- | -- | IGR    | SNP | 0.100 | 36 | 4  |
| --                | chr2 | 92066890 | G     | T      | -- | -- | IGR    | SNP | 0.151 | 45 | 8  |
| --                | chr2 | 92077803 | A     | G      | -- | -- | IGR    | SNP | 0.106 | 42 | 5  |
| --                | chr2 | 92090111 | A     | G      | -- | -- | IGR    | SNP | 0.102 | 44 | 5  |
| --                | chr2 | 92090752 | G     | A      | -- | -- | IGR    | SNP | 0.161 | 26 | 5  |
| --                | chr2 | 92143391 | G     | T      | -- | -- | IGR    | SNP | 0.114 | 39 | 5  |
| --                | chr2 | 92143684 | T     | G      | -- | -- | IGR    | SNP | 0.179 | 23 | 5  |
| --                | chr2 | 92143926 | A     | C      | -- | -- | IGR    | SNP | 0.161 | 26 | 5  |
| --                | chr2 | 92164188 | C     | T      | -- | -- | IGR    | SNP | 0.241 | 22 | 7  |
| --                | chr2 | 92180914 | C     | T      | -- | -- | IGR    | SNP | 0.238 | 16 | 5  |
| --                | chr2 | 92196031 | C     | T      | -- | -- | IGR    | SNP | 0.286 | 25 | 10 |
| --                | chr2 | 92196248 | C     | G      | -- | -- | IGR    | SNP | 0.109 | 49 | 6  |
| --                | chr2 | 92241753 | C     | T      | -- | -- | IGR    | SNP | 0.333 | 10 | 5  |
| --                | chr2 | 92244356 | T     | C      | -- | -- | IGR    | SNP | 0.400 | 3  | 2  |
| --                | chr2 | 92254167 | G     | T      | -- | -- | IGR    | SNP | 0.269 | 19 | 7  |
| --                | chr2 | 92259167 | G     | C      | -- | -- | IGR    | SNP | 0.146 | 35 | 6  |
| --                | chr2 | 92308894 | C     | T      | -- | -- | IGR    | SNP | 0.103 | 52 | 6  |
| --                | chr2 | 95341348 | ATACT | -      | -- | -- | IGR    | DEL | 0.105 | 34 | 4  |
| --                | chr2 | 95381213 | -     | TA     | -- | -- | IGR    | INS | 0.143 | 18 | 3  |
| <i>ANKRD20A8F</i> | chr2 | 95463997 | AG    | -      | -- | -- | RNA    | DEL | 0.114 | 31 | 4  |
| <i>ANKRD20A8F</i> | chr2 | 95464139 | A     | T      | -- | -- | RNA    | SNP | 0.179 | 23 | 5  |
| <i>ANKRD20A8F</i> | chr2 | 95498113 | C     | T      | -- | -- | RNA    | SNP | 0.207 | 23 | 6  |
| <i>ANKRD20A8F</i> | chr2 | 95498128 | A     | G      | -- | -- | RNA    | SNP | 0.241 | 22 | 7  |
| <i>ANKRD20A8F</i> | chr2 | 95498144 | A     | C      | -- | -- | RNA    | SNP | 0.214 | 22 | 6  |
| <i>ANKRD20A8F</i> | chr2 | 95499824 | T     | C      | -- | -- | RNA    | SNP | 0.214 | 22 | 6  |
| <i>ANKRD20A8F</i> | chr2 | 95499825 | G     | A      | -- | -- | RNA    | SNP | 0.214 | 22 | 6  |
| <i>ANKRD20A8F</i> | chr2 | 95499848 | C     | T      | -- | -- | RNA    | SNP | 0.190 | 17 | 4  |
| <i>ANKRD20A8F</i> | chr2 | 95500055 | T     | C      | -- | -- | RNA    | SNP | 0.171 | 29 | 6  |
| --                | chr2 | 95525047 | G     | T      | -- | -- | IGR    | SNP | 0.206 | 27 | 7  |
| <i>LOC442028</i>  | chr2 | 95575988 | T     | A      | -- | -- | RNA    | SNP | 0.190 | 17 | 4  |
| --                | chr2 | 95738197 | G     | T      | -- | -- | IGR    | SNP | 0.125 | 28 | 4  |
| --                | chr2 | 95790372 | A     | G      | -- | -- | IGR    | SNP | 0.667 | 7  | 14 |
| --                | chr2 | 95864114 | A     | G      | -- | -- | IGR    | SNP | 0.532 | 22 | 25 |
| <i>PROM2</i>      | chr2 | 95948720 | G     | T      | -- | -- | Intron | SNP | 0.276 | 42 | 16 |
| --                | chr2 | 96156825 | A     | C      | -- | -- | IGR    | SNP | 0.500 | 6  | 6  |
| --                | chr2 | 96213109 | T     | C      | -- | -- | IGR    | SNP | 0.106 | 42 | 5  |
| --                | chr2 | 96213127 | T     | G      | -- | -- | IGR    | SNP | 0.125 | 35 | 5  |
| --                | chr2 | 96236588 | T     | A      | -- | -- | IGR    | SNP | 0.409 | 26 | 18 |
| --                | chr2 | 96242044 | G     | C      | -- | -- | IGR    | SNP | 0.276 | 21 | 8  |
| --                | chr2 | 96597492 | A     | T      | -- | -- | IGR    | SNP | 0.256 | 29 | 10 |

|                    |      |           |      |     |    |    |        |     |       |    |    |
|--------------------|------|-----------|------|-----|----|----|--------|-----|-------|----|----|
| --                 | chr2 | 96631827  | G    | A   | -- | -- | IGR    | SNP | 0.152 | 28 | 5  |
| --                 | chr2 | 96633396  | -    | GGT | -- | -- | IGR    | INS | 0.464 | 15 | 13 |
| --                 | chr2 | 96643644  | T    | C   | -- | -- | IGR    | SNP | 0.138 | 25 | 4  |
| --                 | chr2 | 96659574  | T    | C   | -- | -- | IGR    | SNP | 0.208 | 19 | 5  |
| --                 | chr2 | 96659589  | T    | G   | -- | -- | IGR    | SNP | 0.226 | 24 | 7  |
| --                 | chr2 | 97059352  | G    | C   | -- | -- | IGR    | SNP | 0.640 | 18 | 32 |
| --                 | chr2 | 97160222  | T    | G   | -- | -- | IGR    | SNP | 0.324 | 25 | 12 |
| <i>FAM178B</i>     | chr2 | 97610050  | T    | C   | -- | -- | Intron | SNP | 0.605 | 15 | 23 |
| <i>ANKRD36</i>     | chr2 | 97807077  | C    | T   | -- | -- | Intron | SNP | 0.152 | 28 | 5  |
| <i>ANKRD36</i>     | chr2 | 97848507  | G    | C   | -- | -- | Intron | SNP | 0.333 | 20 | 10 |
| <i>LOC10050612</i> | chr2 | 97948327  | A    | T   | -- | -- | RNA    | SNP | 0.200 | 12 | 3  |
| <i>ANKRD36B</i>    | chr2 | 98125217  | G    | A   | -- | -- | Intron | SNP | 0.161 | 47 | 9  |
| <i>ANKRD36B</i>    | chr2 | 98167468  | A    | C   | -- | -- | Intron | SNP | 0.121 | 29 | 4  |
| <i>ANKRD36B</i>    | chr2 | 98181251  | G    | T   | -- | -- | Intron | SNP | 0.174 | 19 | 4  |
| --                 | chr2 | 98269357  | G    | A   | -- | -- | IGR    | SNP | 0.255 | 38 | 13 |
| <i>VWA3B</i>       | chr2 | 98768092  | G    | A   | -- | -- | Intron | SNP | 0.261 | 51 | 18 |
| --                 | chr2 | 99403726  | C    | A   | -- | -- | IGR    | SNP | 0.298 | 33 | 14 |
| --                 | chr2 | 99403727  | T    | C   | -- | -- | IGR    | SNP | 0.304 | 32 | 14 |
| --                 | chr2 | 99835066  | TC   | -   | -- | -- | IGR    | DEL | 0.107 | 25 | 3  |
| --                 | chr2 | 99933248  | C    | G   | -- | -- | IGR    | SNP | 0.242 | 25 | 8  |
| <i>REV1</i>        | chr2 | 100035667 | A    | T   | -- | -- | Intron | SNP | 0.231 | 10 | 3  |
| <i>REV1</i>        | chr2 | 100061590 | -    | GA  | -- | -- | Intron | INS | 0.108 | 32 | 4  |
| <i>REV1</i>        | chr2 | 100099496 | A    | T   | -- | -- | Intron | SNP | 0.200 | 28 | 7  |
| <i>AFF3</i>        | chr2 | 100477007 | C    | A   | -- | -- | Intron | SNP | 0.308 | 9  | 4  |
| <i>AFF3</i>        | chr2 | 100685735 | C    | T   | -- | -- | Intron | SNP | 0.200 | 24 | 6  |
| --                 | chr2 | 100800985 | G    | A   | -- | -- | IGR    | SNP | 0.610 | 16 | 25 |
| --                 | chr2 | 100801136 | G    | A   | -- | -- | IGR    | SNP | 0.652 | 16 | 30 |
| --                 | chr2 | 100801607 | C    | G   | -- | -- | IGR    | SNP | 0.582 | 23 | 32 |
| --                 | chr2 | 100839299 | C    | A   | -- | -- | IGR    | SNP | 0.297 | 26 | 11 |
| <i>TBC1D8</i>      | chr2 | 101750632 | T    | C   | -- | -- | Intron | SNP | 0.192 | 21 | 5  |
| <i>TBC1D8</i>      | chr2 | 101758220 | A    | G   | -- | -- | Intron | SNP | 0.297 | 26 | 11 |
| --                 | chr2 | 101795578 | G    | T   | -- | -- | IGR    | SNP | 0.484 | 16 | 15 |
| <i>RFX8</i>        | chr2 | 102016166 | C    | T   | -- | -- | Intron | SNP | 0.236 | 42 | 13 |
| <i>RFX8</i>        | chr2 | 102064400 | C    | A   | -- | -- | Intron | SNP | 0.204 | 39 | 10 |
| --                 | chr2 | 102120593 | G    | A   | -- | -- | IGR    | SNP | 0.176 | 14 | 3  |
| <i>SLC9A2</i>      | chr2 | 103321506 | A    | G   | -- | -- | Intron | SNP | 0.652 | 8  | 15 |
| <i>MFSD9</i>       | chr2 | 103336923 | C    | A   | -- | -- | Intron | SNP | 0.367 | 31 | 18 |
| <i>TMEM182</i>     | chr2 | 103417193 | C    | G   | -- | -- | Intron | SNP | 0.195 | 33 | 8  |
| --                 | chr2 | 103748352 | AAAG | -   | -- | -- | IGR    | DEL | 0.133 | 13 | 2  |
| --                 | chr2 | 103835807 | C    | G   | -- | -- | IGR    | SNP | 0.657 | 12 | 23 |
| --                 | chr2 | 103947827 | -    | TA  | -- | -- | IGR    | INS | 0.125 | 21 | 3  |
| --                 | chr2 | 104254053 | C    | G   | -- | -- | IGR    | SNP | 0.200 | 32 | 8  |
| --                 | chr2 | 104316983 | C    | A   | -- | -- | IGR    | SNP | 0.250 | 21 | 7  |
| --                 | chr2 | 104316984 | T    | C   | -- | -- | IGR    | SNP | 0.259 | 20 | 7  |
| --                 | chr2 | 104545099 | T    | C   | -- | -- | IGR    | SNP | 0.167 | 30 | 6  |
| --                 | chr2 | 104745948 | C    | A   | -- | -- | IGR    | SNP | 0.250 | 12 | 4  |
| --                 | chr2 | 104825320 | A    | G   | -- | -- | IGR    | SNP | 0.265 | 36 | 13 |
| --                 | chr2 | 104825321 | G    | T   | -- | -- | IGR    | SNP | 0.271 | 35 | 13 |
| --                 | chr2 | 104867243 | G    | T   | -- | -- | IGR    | SNP | 0.375 | 20 | 12 |
| --                 | chr2 | 104883502 | G    | C   | -- | -- | IGR    | SNP | 0.290 | 22 | 9  |
| --                 | chr2 | 104906493 | G    | A   | -- | -- | IGR    | SNP | 0.333 | 34 | 17 |
| --                 | chr2 | 104950154 | G    | C   | -- | -- | IGR    | SNP | 0.535 | 20 | 23 |
| <i>LOC150568</i>   | chr2 | 105127601 | G    | T   | -- | -- | RNA    | SNP | 0.269 | 19 | 7  |
| --                 | chr2 | 105194164 | C    | G   | -- | -- | IGR    | SNP | 0.256 | 32 | 11 |
| --                 | chr2 | 105258294 | C    | T   | -- | -- | IGR    | SNP | 0.122 | 43 | 6  |
| <i>LOC10050642</i> | chr2 | 105449487 | C    | A   | -- | -- | RNA    | SNP | 0.375 | 20 | 12 |
| --                 | chr2 | 105540196 | G    | A   | -- | -- | IGR    | SNP | 0.235 | 26 | 8  |
| --                 | chr2 | 105733041 | G    | C   | -- | -- | IGR    | SNP | 0.111 | 32 | 4  |
| --                 | chr2 | 105823090 | A    | G   | -- | -- | IGR    | SNP | 0.438 | 9  | 7  |
| --                 | chr2 | 105823098 | G    | T   | -- | -- | IGR    | SNP | 0.467 | 8  | 7  |
| --                 | chr2 | 105823804 | T    | G   | -- | -- | IGR    | SNP | 0.222 | 14 | 4  |
| --                 | chr2 | 105823838 | A    | G   | -- | -- | IGR    | SNP | 0.235 | 13 | 4  |
| <i>LOC285000</i>   | chr2 | 106210118 | G    | T   | -- | -- | RNA    | SNP | 0.567 | 29 | 38 |
| --                 | chr2 | 106272710 | TTC  | -   | -- | -- | IGR    | DEL | 0.115 | 23 | 3  |
| --                 | chr2 | 106333900 | G    | A   | -- | -- | IGR    | SNP | 0.298 | 40 | 17 |
| --                 | chr2 | 106340826 | G    | A   | -- | -- | IGR    | SNP | 0.258 | 23 | 8  |
| --                 | chr2 | 106882111 | A    | T   | -- | -- | IGR    | SNP | 0.389 | 11 | 7  |
| --                 | chr2 | 107143482 | C    | G   | -- | -- | IGR    | SNP | 0.250 | 27 | 9  |
| <i>ST6GAL2</i>     | chr2 | 107502706 | C    | T   | -- | -- | Intron | SNP | 0.429 | 24 | 18 |
| --                 | chr2 | 107643559 | T    | A   | -- | -- | IGR    | SNP | 0.217 | 18 | 5  |
| --                 | chr2 | 107981714 | A    | G   | -- | -- | IGR    | SNP | 0.179 | 32 | 7  |
| --                 | chr2 | 108040456 | G    | T   | -- | -- | IGR    | SNP | 0.244 | 31 | 10 |
| --                 | chr2 | 108107351 | A    | C   | -- | -- | IGR    | SNP | 0.207 | 23 | 6  |
| --                 | chr2 | 108146014 | G    | C   | -- | -- | IGR    | SNP | 0.548 | 19 | 23 |
| --                 | chr2 | 108271201 | G    | C   | -- | -- | IGR    | SNP | 0.286 | 20 | 8  |
| --                 | chr2 | 108398471 | G    | A   | -- | -- | IGR    | SNP | 0.158 | 32 | 6  |
| <i>LOC729121</i>   | chr2 | 108441553 | C    | T   | -- | -- | RNA    | SNP | 0.167 | 30 | 6  |
| --                 | chr2 | 108564196 | C    | T   | -- | -- | IGR    | SNP | 0.273 | 24 | 9  |
| --                 | chr2 | 108587233 | C    | G   | -- | -- | IGR    | SNP | 0.500 | 2  | 2  |
| --                 | chr2 | 108667528 | C    | G   | -- | -- | IGR    | SNP | 0.214 | 33 | 9  |

|            |      |           |     |       |    |    |         |     |       |    |    |
|------------|------|-----------|-----|-------|----|----|---------|-----|-------|----|----|
| --         | chr2 | 108669425 | G   | C     | -- | -- | IGR     | SNP | 0.400 | 30 | 20 |
| --         | chr2 | 108797476 | C   | A     | -- | -- | IGR     | SNP | 0.261 | 17 | 6  |
| GCC2       | chr2 | 109068362 | C   | T     | -- | -- | Intron  | SNP | 0.121 | 29 | 4  |
| GCC2       | chr2 | 109099769 | T   | A     | -- | -- | Intron  | SNP | 0.333 | 16 | 8  |
| CCDC138    | chr2 | 109454074 | G   | T     | -- | -- | Intron  | SNP | 0.593 | 22 | 32 |
| SH3RF3     | chr2 | 109762596 | G   | A     | -- | -- | Intron  | SNP | 0.636 | 20 | 35 |
| SH3RF3     | chr2 | 109899274 | C   | A     | -- | -- | Intron  | SNP | 0.673 | 18 | 37 |
| --         | chr2 | 110476939 | A   | T     | -- | -- | IGR     | SNP | 0.375 | 15 | 9  |
| MALL       | chr2 | 110865022 | A   | G     | -- | -- | Intron  | SNP | 0.340 | 31 | 16 |
| NPHP1      | chr2 | 110884971 | G   | A     | -- | -- | Intron  | SNP | 0.818 | 8  | 36 |
| ACOXL      | chr2 | 111742428 | G   | T     | -- | -- | Intron  | SNP | 0.575 | 17 | 23 |
| ACOXL      | chr2 | 111779072 | T   | C     | -- | -- | Intron  | SNP | 0.250 | 30 | 10 |
| --         | chr2 | 112292237 | G   | A     | -- | -- | IGR     | SNP | 0.200 | 24 | 6  |
| MERTK      | chr2 | 112687350 | TG  | -     | -- | -- | Intron  | DEL | 0.118 | 15 | 2  |
| ZC3H8      | chr2 | 112987539 | C   | T     | -- | -- | Intron  | SNP | 0.400 | 21 | 14 |
| ZC3H6      | chr2 | 113046381 | G   | C     | -- | -- | Intron  | SNP | 0.111 | 32 | 4  |
| ZC3H6      | chr2 | 113065867 | G   | C     | -- | -- | Intron  | SNP | 0.538 | 6  | 7  |
| RGPD5,RGPL | chr2 | 113128632 | -   | TA    | -- | -- | Intron  | INS | 0.115 | 23 | 3  |
| RGPD5,RGPL | chr2 | 113171631 | G   | C     | -- | -- | Intron  | SNP | 0.455 | 6  | 5  |
| --         | chr2 | 113237147 | G   | C     | -- | -- | IGR     | SNP | 0.565 | 20 | 26 |
| --         | chr2 | 113972037 | A   | C     | -- | -- | IGR     | SNP | 0.333 | 24 | 12 |
| --         | chr2 | 114175120 | G   | A     | -- | -- | IGR     | SNP | 0.226 | 24 | 7  |
| --         | chr2 | 114176250 | C   | T     | -- | -- | IGR     | SNP | 0.206 | 27 | 7  |
| --         | chr2 | 114177671 | G   | T     | -- | -- | IGR     | SNP | 0.200 | 16 | 4  |
| --         | chr2 | 114268213 | G   | A     | -- | -- | IGR     | SNP | 0.138 | 25 | 4  |
| --         | chr2 | 114325083 | CCT | -     | -- | -- | IGR     | DEL | 0.109 | 49 | 6  |
| FAM138B    | chr2 | 114334446 | G   | A     | -- | -- | 5'Flank | SNP | 0.111 | 32 | 4  |
| RABL2A     | chr2 | 114397728 | -   | GTAAA | -- | -- | Intron  | INS | 0.241 | 22 | 7  |
| --         | chr2 | 114408234 | A   | G     | -- | -- | IGR     | SNP | 0.345 | 19 | 10 |
| --         | chr2 | 114408972 | A   | C     | -- | -- | IGR     | SNP | 0.429 | 8  | 6  |
| --         | chr2 | 114409004 | T   | A     | -- | -- | IGR     | SNP | 0.278 | 13 | 5  |
| --         | chr2 | 114409510 | T   | A     | -- | -- | IGR     | SNP | 0.292 | 17 | 7  |
| SLC35F5    | chr2 | 114499275 | AT  | -     | -- | -- | Intron  | DEL | 0.107 | 25 | 3  |
| SLC35F5    | chr2 | 114510590 | G   | A     | -- | -- | Intron  | SNP | 0.250 | 21 | 7  |
| --         | chr2 | 114566796 | G   | T     | -- | -- | IGR     | SNP | 0.581 | 13 | 18 |
| --         | chr2 | 114936301 | A   | T     | -- | -- | IGR     | SNP | 0.200 | 24 | 6  |
| --         | chr2 | 115118487 | A   | G     | -- | -- | IGR     | SNP | 0.250 | 27 | 9  |
| DPP10      | chr2 | 115204630 | G   | T     | -- | -- | Intron  | SNP | 0.222 | 14 | 4  |
| DPP10      | chr2 | 115240431 | A   | T     | -- | -- | Intron  | SNP | 0.148 | 23 | 4  |
| DPP10      | chr2 | 115591836 | A   | C     | -- | -- | Intron  | SNP | 0.194 | 29 | 7  |
| DPP10      | chr2 | 115598178 | C   | A     | -- | -- | Intron  | SNP | 0.214 | 22 | 6  |
| DPP10      | chr2 | 115753614 | C   | A     | -- | -- | Intron  | SNP | 0.186 | 35 | 8  |
| DPP10      | chr2 | 115753615 | T   | C     | -- | -- | Intron  | SNP | 0.190 | 34 | 8  |
| DPP10      | chr2 | 115846348 | C   | A     | -- | -- | Intron  | SNP | 0.214 | 22 | 6  |
| LOC389023  | chr2 | 115909566 | T   | G     | -- | -- | RNA     | SNP | 0.167 | 25 | 5  |
| DPP10      | chr2 | 116094599 | T   | C     | -- | -- | Intron  | SNP | 0.370 | 17 | 10 |
| DPP10      | chr2 | 116311618 | C   | A     | -- | -- | Intron  | SNP | 0.167 | 15 | 3  |
| DPP10      | chr2 | 116537247 | C   | A     | -- | -- | Intron  | SNP | 0.545 | 15 | 18 |
| --         | chr2 | 116624601 | A   | C     | -- | -- | IGR     | SNP | 0.273 | 24 | 9  |
| --         | chr2 | 116652614 | G   | A     | -- | -- | IGR     | SNP | 0.714 | 10 | 25 |
| --         | chr2 | 116727616 | G   | C     | -- | -- | IGR     | SNP | 0.161 | 26 | 5  |
| --         | chr2 | 116914767 | C   | G     | -- | -- | IGR     | SNP | 0.353 | 11 | 6  |
| --         | chr2 | 116944961 | CT  | -     | -- | -- | IGR     | DEL | 0.133 | 13 | 2  |
| --         | chr2 | 116964066 | G   | A     | -- | -- | IGR     | SNP | 0.310 | 20 | 9  |
| --         | chr2 | 117017866 | G   | A     | -- | -- | IGR     | SNP | 0.100 | 27 | 3  |
| --         | chr2 | 117119191 | G   | A     | -- | -- | IGR     | SNP | 0.484 | 16 | 15 |
| --         | chr2 | 117435499 | T   | A     | -- | -- | IGR     | SNP | 0.583 | 15 | 21 |
| --         | chr2 | 117541480 | G   | C     | -- | -- | IGR     | SNP | 0.342 | 25 | 13 |
| --         | chr2 | 117660009 | C   | G     | -- | -- | IGR     | SNP | 0.520 | 12 | 13 |
| --         | chr2 | 117725626 | C   | T     | -- | -- | IGR     | SNP | 0.162 | 31 | 6  |
| --         | chr2 | 117896888 | A   | T     | -- | -- | IGR     | SNP | 0.407 | 16 | 11 |
| --         | chr2 | 117903769 | G   | A     | -- | -- | IGR     | SNP | 0.304 | 32 | 14 |
| --         | chr2 | 117917249 | CA  | -     | -- | -- | IGR     | DEL | 0.125 | 14 | 2  |
| --         | chr2 | 117917528 | G   | A     | -- | -- | IGR     | SNP | 0.167 | 20 | 4  |
| --         | chr2 | 117955055 | G   | C     | -- | -- | IGR     | SNP | 0.513 | 19 | 20 |
| --         | chr2 | 118072986 | T   | C     | -- | -- | IGR     | SNP | 0.321 | 19 | 9  |
| --         | chr2 | 118156665 | T   | A     | -- | -- | IGR     | SNP | 0.267 | 33 | 12 |
| --         | chr2 | 118284359 | G   | C     | -- | -- | IGR     | SNP | 0.400 | 3  | 2  |
| --         | chr2 | 118287279 | A   | C     | -- | -- | IGR     | SNP | 0.143 | 18 | 3  |
| --         | chr2 | 118311030 | C   | G     | -- | -- | IGR     | SNP | 0.633 | 18 | 31 |
| --         | chr2 | 118321668 | G   | C     | -- | -- | IGR     | SNP | 0.167 | 25 | 5  |
| --         | chr2 | 118367620 | GAA | -     | -- | -- | IGR     | DEL | 0.220 | 32 | 9  |
| --         | chr2 | 118478431 | T   | A     | -- | -- | IGR     | SNP | 0.405 | 22 | 15 |
| --         | chr2 | 118490897 | T   | A     | -- | -- | IGR     | SNP | 0.351 | 24 | 13 |
| --         | chr2 | 118651641 | C   | T     | -- | -- | IGR     | SNP | 0.190 | 17 | 4  |
| --         | chr2 | 118799909 | C   | T     | -- | -- | IGR     | SNP | 0.138 | 25 | 4  |
| --         | chr2 | 118981790 | G   | A     | -- | -- | IGR     | SNP | 0.127 | 62 | 9  |
| --         | chr2 | 119153517 | G   | A     | -- | -- | IGR     | SNP | 0.853 | 10 | 58 |
| --         | chr2 | 119161848 | G   | A     | -- | -- | IGR     | SNP | 0.379 | 77 | 47 |
| --         | chr2 | 119204412 | G   | T     | -- | -- | IGR     | SNP | 0.190 | 17 | 4  |

|          |      |           |     |        |    |    |         |     |       |    |    |
|----------|------|-----------|-----|--------|----|----|---------|-----|-------|----|----|
| --       | chr2 | 119596336 | G   | A      | -- | -- | IGR     | SNP | 0.769 | 6  | 20 |
| MARCO    | chr2 | 119730600 | T   | A      | -- | -- | Intron  | SNP | 0.444 | 5  | 4  |
| MARCO    | chr2 | 119730612 | T   | G      | -- | -- | Intron  | SNP | 0.500 | 5  | 5  |
| MARCO    | chr2 | 119744247 | -   | AG     | -- | -- | Intron  | INS | 0.214 | 11 | 3  |
| --       | chr2 | 120145725 | TC  | -      | -- | -- | IGR     | DEL | 0.111 | 16 | 2  |
| PTPN4    | chr2 | 120583090 | G   | T      | -- | -- | Intron  | SNP | 0.429 | 4  | 3  |
| EPB41L5  | chr2 | 120933719 | G   | C      | -- | -- | 3'UTR   | SNP | 0.340 | 31 | 16 |
| --       | chr2 | 120960245 | G   | T      | -- | -- | IGR     | SNP | 0.704 | 16 | 38 |
| --       | chr2 | 121206159 | C   | T      | -- | -- | IGR     | SNP | 0.250 | 48 | 16 |
| --       | chr2 | 121303312 | G   | A      | -- | -- | IGR     | SNP | 0.783 | 10 | 36 |
| --       | chr2 | 121465284 | A   | G      | -- | -- | IGR     | SNP | 0.354 | 42 | 23 |
| GLI2     | chr2 | 121617344 | C   | T      | -- | -- | Intron  | SNP | 0.348 | 15 | 8  |
| --       | chr2 | 121815060 | G   | A      | -- | -- | IGR     | SNP | 0.301 | 51 | 22 |
| --       | chr2 | 121821819 | C   | T      | -- | -- | IGR     | SNP | 0.682 | 14 | 30 |
| CLASP1   | chr2 | 122109726 | G   | C      | -- | -- | Intron  | SNP | 0.699 | 25 | 58 |
| CLASP1   | chr2 | 122119653 | G   | A      | -- | -- | Intron  | SNP | 0.632 | 25 | 43 |
| CLASP1   | chr2 | 122140698 | G   | C      | -- | -- | Intron  | SNP | 0.127 | 62 | 9  |
| --       | chr2 | 122776080 | C   | T      | -- | -- | IGR     | SNP | 0.222 | 35 | 10 |
| --       | chr2 | 122863318 | A   | T      | -- | -- | IGR     | SNP | 0.160 | 42 | 8  |
| --       | chr2 | 122999589 | C   | G      | -- | -- | IGR     | SNP | 0.302 | 37 | 16 |
| --       | chr2 | 123009229 | T   | C      | -- | -- | IGR     | SNP | 0.617 | 23 | 37 |
| --       | chr2 | 123526953 | A   | T      | -- | -- | IGR     | SNP | 0.580 | 21 | 29 |
| --       | chr2 | 123656925 | G   | A      | -- | -- | IGR     | SNP | 0.265 | 36 | 13 |
| --       | chr2 | 124001982 | C   | A      | -- | -- | IGR     | SNP | 0.676 | 11 | 23 |
| --       | chr2 | 124002424 | G   | C      | -- | -- | IGR     | SNP | 0.674 | 15 | 31 |
| --       | chr2 | 124129450 | A   | G      | -- | -- | IGR     | SNP | 0.120 | 44 | 6  |
| --       | chr2 | 124206034 | A   | C      | -- | -- | IGR     | SNP | 0.289 | 27 | 11 |
| --       | chr2 | 124364370 | T   | C      | -- | -- | IGR     | SNP | 0.704 | 21 | 50 |
| --       | chr2 | 124493403 | G   | A      | -- | -- | IGR     | SNP | 0.174 | 38 | 8  |
| --       | chr2 | 124704282 | T   | C      | -- | -- | IGR     | SNP | 0.375 | 25 | 15 |
| CNTNAP5  | chr2 | 125089879 | T   | A      | -- | -- | Intron  | SNP | 0.556 | 8  | 10 |
| CNTNAP5  | chr2 | 125143110 | A   | G      | -- | -- | Intron  | SNP | 0.355 | 20 | 11 |
| CNTNAP5  | chr2 | 125215388 | A   | C      | -- | -- | Intron  | SNP | 0.308 | 9  | 4  |
| CNTNAP5  | chr2 | 125290452 | G   | T      | -- | -- | Intron  | SNP | 0.655 | 10 | 19 |
| CNTNAP5  | chr2 | 125316913 | C   | T      | -- | -- | Intron  | SNP | 0.310 | 20 | 9  |
| CNTNAP5  | chr2 | 125540678 | A   | T      | -- | -- | Intron  | SNP | 0.308 | 18 | 8  |
| --       | chr2 | 125682687 | A   | T      | -- | -- | IGR     | SNP | 0.214 | 22 | 6  |
| --       | chr2 | 125682795 | G   | T      | -- | -- | IGR     | SNP | 0.455 | 18 | 15 |
| --       | chr2 | 125693444 | T   | A      | -- | -- | IGR     | SNP | 0.200 | 24 | 6  |
| --       | chr2 | 125788311 | TG  | -      | -- | -- | IGR     | DEL | 0.250 | 12 | 4  |
| --       | chr2 | 125849604 | T   | A      | -- | -- | IGR     | SNP | 0.571 | 9  | 12 |
| --       | chr2 | 126045089 | A   | T      | -- | -- | IGR     | SNP | 0.167 | 30 | 6  |
| --       | chr2 | 126304626 | C   | T      | -- | -- | IGR     | SNP | 0.304 | 16 | 7  |
| --       | chr2 | 126351338 | G   | C      | -- | -- | IGR     | SNP | 0.429 | 12 | 9  |
| --       | chr2 | 126422444 | G   | A      | -- | -- | IGR     | SNP | 0.325 | 27 | 13 |
| --       | chr2 | 126657567 | A   | C      | -- | -- | IGR     | SNP | 0.182 | 27 | 6  |
| --       | chr2 | 126966314 | C   | G      | -- | -- | IGR     | SNP | 0.118 | 30 | 4  |
| --       | chr2 | 127030860 | T   | C      | -- | -- | IGR     | SNP | 0.531 | 15 | 17 |
| --       | chr2 | 127079604 | G   | C      | -- | -- | IGR     | SNP | 0.406 | 19 | 13 |
| --       | chr2 | 127084923 | G   | C      | -- | -- | IGR     | SNP | 0.194 | 29 | 7  |
| --       | chr2 | 127102525 | T   | A      | -- | -- | IGR     | SNP | 0.129 | 27 | 4  |
| --       | chr2 | 127227162 | G   | A      | -- | -- | IGR     | SNP | 0.407 | 16 | 11 |
| --       | chr2 | 127359254 | C   | A      | -- | -- | IGR     | SNP | 0.387 | 19 | 12 |
| --       | chr2 | 127403308 | T   | A      | -- | -- | IGR     | SNP | 0.286 | 20 | 8  |
| --       | chr2 | 127550015 | C   | T      | -- | -- | IGR     | SNP | 0.189 | 30 | 7  |
| --       | chr2 | 128011321 | G   | C      | -- | -- | IGR     | SNP | 0.625 | 6  | 10 |
| --       | chr2 | 128144968 | A   | G      | -- | -- | IGR     | SNP | 0.500 | 3  | 3  |
| POLR2D   | chr2 | 128604233 | T   | A      | -- | -- | 3'UTR   | SNP | 0.200 | 32 | 8  |
| AMMECR1L | chr2 | 128644194 | -   | GTCGCC | -- | -- | 5'Flank | INS | 0.105 | 34 | 4  |
| --       | chr2 | 129229192 | C   | A      | -- | -- | IGR     | SNP | 0.200 | 24 | 6  |
| --       | chr2 | 129532055 | T   | A      | -- | -- | IGR     | SNP | 0.286 | 25 | 10 |
| --       | chr2 | 129733185 | C   | G      | -- | -- | IGR     | SNP | 0.400 | 21 | 14 |
| --       | chr2 | 129865070 | G   | T      | -- | -- | IGR     | SNP | 0.237 | 29 | 9  |
| --       | chr2 | 130024139 | G   | A      | -- | -- | IGR     | SNP | 0.586 | 12 | 17 |
| --       | chr2 | 130052118 | G   | C      | -- | -- | IGR     | SNP | 0.583 | 5  | 7  |
| --       | chr2 | 130059679 | A   | C      | -- | -- | IGR     | SNP | 0.417 | 21 | 15 |
| --       | chr2 | 130597811 | T   | A      | -- | -- | IGR     | SNP | 0.136 | 19 | 3  |
| --       | chr2 | 130606041 | C   | G      | -- | -- | IGR     | SNP | 0.217 | 36 | 10 |
| --       | chr2 | 130610902 | A   | C      | -- | -- | IGR     | SNP | 0.303 | 23 | 10 |
| --       | chr2 | 130751853 | A   | G      | -- | -- | IGR     | SNP | 0.125 | 28 | 4  |
| --       | chr2 | 130775864 | C   | A      | -- | -- | IGR     | SNP | 0.263 | 14 | 5  |
| --       | chr2 | 130818923 | C   | G      | -- | -- | IGR     | SNP | 0.333 | 10 | 5  |
| POTEF    | chr2 | 130861013 | T   | C      | -- | -- | Intron  | SNP | 0.697 | 10 | 23 |
| --       | chr2 | 131008498 | T   | A      | -- | -- | IGR     | SNP | 0.143 | 30 | 5  |
| --       | chr2 | 131035661 | C   | T      | -- | -- | IGR     | SNP | 0.125 | 21 | 3  |
| --       | chr2 | 131205322 | CAT | -      | -- | -- | IGR     | DEL | 0.111 | 16 | 2  |
| --       | chr2 | 131399632 | G   | C      | -- | -- | IGR     | SNP | 0.318 | 30 | 14 |
| --       | chr2 | 131503625 | GAT | -      | -- | -- | IGR     | DEL | 0.125 | 14 | 2  |
| --       | chr2 | 131546007 | G   | A      | -- | -- | IGR     | SNP | 0.577 | 11 | 15 |
| --       | chr2 | 131957639 | A   | T      | -- | -- | IGR     | SNP | 0.118 | 30 | 4  |

|                    |      |           |      |       |    |    |        |     |       |    |    |
|--------------------|------|-----------|------|-------|----|----|--------|-----|-------|----|----|
| --                 | chr2 | 132091552 | -    | AT    | -- | -- | IGR    | INS | 0.133 | 13 | 2  |
| --                 | chr2 | 132107996 | TG   | -     | -- | -- | IGR    | DEL | 0.143 | 12 | 2  |
| --                 | chr2 | 132128896 | A    | G     | -- | -- | IGR    | SNP | 0.303 | 23 | 10 |
| --                 | chr2 | 132155344 | GA   | -     | -- | -- | IGR    | DEL | 0.156 | 27 | 5  |
| <i>LOC401010</i>   | chr2 | 132201115 | C    | T     | -- | -- | RNA    | SNP | 0.340 | 33 | 17 |
| --                 | chr2 | 132321850 | T    | C     | -- | -- | IGR    | SNP | 0.116 | 38 | 5  |
| --                 | chr2 | 132321851 | A    | G     | -- | -- | IGR    | SNP | 0.114 | 39 | 5  |
| --                 | chr2 | 132321886 | G    | C     | -- | -- | IGR    | SNP | 0.114 | 39 | 5  |
| --                 | chr2 | 132402638 | T    | A     | -- | -- | IGR    | SNP | 0.143 | 30 | 5  |
| --                 | chr2 | 132402639 | C    | T     | -- | -- | IGR    | SNP | 0.143 | 30 | 5  |
| --                 | chr2 | 132402651 | -    | TC    | -- | -- | IGR    | INS | 0.156 | 27 | 5  |
| --                 | chr2 | 132437660 | C    | G     | -- | -- | IGR    | SNP | 0.100 | 27 | 3  |
| <i>C2orf27A</i>    | chr2 | 132486763 | -    | TTTTG | -- | -- | Intron | INS | 0.217 | 18 | 5  |
| <i>C2orf27A</i>    | chr2 | 132512292 | A    | G     | -- | -- | Intron | SNP | 0.667 | 3  | 6  |
| --                 | chr2 | 132549474 | G    | A     | -- | -- | IGR    | SNP | 0.125 | 42 | 6  |
| --                 | chr2 | 132565923 | A    | T     | -- | -- | IGR    | SNP | 0.226 | 24 | 7  |
| --                 | chr2 | 132644663 | G    | T     | -- | -- | IGR    | SNP | 0.111 | 24 | 3  |
| --                 | chr2 | 132644851 | C    | T     | -- | -- | IGR    | SNP | 0.111 | 24 | 3  |
| --                 | chr2 | 132698416 | T    | C     | -- | -- | IGR    | SNP | 0.125 | 28 | 4  |
| --                 | chr2 | 132698430 | T    | C     | -- | -- | IGR    | SNP | 0.108 | 33 | 4  |
| --                 | chr2 | 132704723 | C    | T     | -- | -- | IGR    | SNP | 0.130 | 20 | 3  |
| --                 | chr2 | 132706343 | T    | C     | -- | -- | IGR    | SNP | 0.200 | 12 | 3  |
| --                 | chr2 | 132728617 | G    | T     | -- | -- | IGR    | SNP | 0.125 | 28 | 4  |
| --                 | chr2 | 132769366 | C    | A     | -- | -- | IGR    | SNP | 0.167 | 35 | 7  |
| --                 | chr2 | 132775192 | C    | G     | -- | -- | IGR    | SNP | 0.132 | 33 | 5  |
| --                 | chr2 | 132777716 | A    | G     | -- | -- | IGR    | SNP | 0.250 | 15 | 5  |
| --                 | chr2 | 132787348 | A    | G     | -- | -- | IGR    | SNP | 0.278 | 13 | 5  |
| --                 | chr2 | 132787426 | G    | A     | -- | -- | IGR    | SNP | 0.278 | 13 | 5  |
| --                 | chr2 | 132792808 | C    | T     | -- | -- | IGR    | SNP | 0.107 | 25 | 3  |
| --                 | chr2 | 132801505 | T    | A     | -- | -- | IGR    | SNP | 0.114 | 31 | 4  |
| --                 | chr2 | 132801511 | C    | T     | -- | -- | IGR    | SNP | 0.125 | 28 | 4  |
| --                 | chr2 | 132804731 | C    | T     | -- | -- | IGR    | SNP | 0.214 | 11 | 3  |
| --                 | chr2 | 132808060 | C    | T     | -- | -- | IGR    | SNP | 0.146 | 35 | 6  |
| --                 | chr2 | 132818586 | C    | A     | -- | -- | IGR    | SNP | 0.200 | 28 | 7  |
| --                 | chr2 | 132851661 | G    | C     | -- | -- | IGR    | SNP | 0.409 | 13 | 9  |
| --                 | chr2 | 132873737 | AC   | -     | -- | -- | IGR    | DEL | 0.111 | 16 | 2  |
| --                 | chr2 | 132882535 | T    | A     | -- | -- | IGR    | SNP | 0.161 | 26 | 5  |
| --                 | chr2 | 132884949 | T    | G     | -- | -- | IGR    | SNP | 0.231 | 10 | 3  |
| --                 | chr2 | 132888294 | A    | G     | -- | -- | IGR    | SNP | 0.189 | 30 | 7  |
| --                 | chr2 | 132891666 | T    | G     | -- | -- | IGR    | SNP | 0.240 | 19 | 6  |
| <i>ANKRD30BL</i>   | chr2 | 132909443 | G    | A     | -- | -- | RNA    | SNP | 0.167 | 20 | 4  |
| <i>ANKRD30BL</i>   | chr2 | 132928444 | T    | G     | -- | -- | RNA    | SNP | 0.214 | 11 | 3  |
| <i>ANKRD30BL</i>   | chr2 | 132940054 | CAGA | -     | -- | -- | RNA    | DEL | 0.214 | 11 | 3  |
| <i>GPR39</i>       | chr2 | 133249964 | TAC  | -     | -- | -- | Intron | DEL | 0.128 | 34 | 5  |
| <i>GPR39</i>       | chr2 | 133382769 | G    | A     | -- | -- | Intron | SNP | 0.478 | 24 | 22 |
| <i>NCKAP5</i>      | chr2 | 133643215 | T    | A     | -- | -- | Intron | SNP | 0.286 | 25 | 10 |
| <i>NCKAP5</i>      | chr2 | 133749245 | C    | A     | -- | -- | Intron | SNP | 0.200 | 28 | 7  |
| <i>NCKAP5</i>      | chr2 | 133874090 | G    | A     | -- | -- | Intron | SNP | 0.250 | 9  | 3  |
| --                 | chr2 | 134400312 | -    | GT    | -- | -- | IGR    | INS | 0.154 | 22 | 4  |
| --                 | chr2 | 134789664 | C    | G     | -- | -- | IGR    | SNP | 0.724 | 8  | 21 |
| --                 | chr2 | 134821618 | A    | G     | -- | -- | IGR    | SNP | 0.286 | 10 | 4  |
| <i>TMEM163</i>     | chr2 | 135266609 | T    | A     | -- | -- | Intron | SNP | 0.186 | 35 | 8  |
| <i>LOC10012996</i> | chr2 | 135649475 | G    | C     | -- | -- | RNA    | SNP | 0.559 | 15 | 19 |
| <i>CCNT2</i>       | chr2 | 135707514 | -    | GC    | -- | -- | Intron | INS | 0.107 | 25 | 3  |
| <i>ZRANB3</i>      | chr2 | 136012845 | G    | C     | -- | -- | Intron | SNP | 0.120 | 22 | 3  |
| <i>ZRANB3</i>      | chr2 | 136044983 | G    | C     | -- | -- | Intron | SNP | 0.512 | 21 | 22 |
| <i>ZRANB3</i>      | chr2 | 136171626 | A    | C     | -- | -- | Intron | SNP | 0.286 | 15 | 6  |
| <i>ZRANB3</i>      | chr2 | 136251899 | G    | A     | -- | -- | Intron | SNP | 0.375 | 10 | 6  |
| <i>R3HDM1</i>      | chr2 | 136421601 | C    | A     | -- | -- | Intron | SNP | 0.250 | 12 | 4  |
| <i>R3HDM1</i>      | chr2 | 136448553 | T    | C     | -- | -- | Intron | SNP | 0.568 | 16 | 21 |
| <i>DARS</i>        | chr2 | 136732978 | A    | G     | -- | -- | Intron | SNP | 0.167 | 15 | 3  |
| --                 | chr2 | 136928256 | A    | G     | -- | -- | IGR    | SNP | 0.370 | 29 | 17 |
| --                 | chr2 | 136956736 | G    | A     | -- | -- | IGR    | SNP | 0.714 | 6  | 15 |
| --                 | chr2 | 137107675 | C    | T     | -- | -- | IGR    | SNP | 0.375 | 20 | 12 |
| --                 | chr2 | 137267678 | C    | G     | -- | -- | IGR    | SNP | 0.255 | 35 | 12 |
| --                 | chr2 | 137312233 | A    | C     | -- | -- | IGR    | SNP | 0.174 | 38 | 8  |
| <i>THSD7B</i>      | chr2 | 138147303 | G    | T     | -- | -- | Intron | SNP | 0.259 | 20 | 7  |
| <i>THSD7B</i>      | chr2 | 138156766 | T    | C     | -- | -- | Intron | SNP | 0.471 | 9  | 8  |
| <i>THSD7B</i>      | chr2 | 138197835 | A    | G     | -- | -- | Intron | SNP | 0.333 | 16 | 8  |
| <i>THSD7B</i>      | chr2 | 138386521 | C    | T     | -- | -- | Intron | SNP | 0.208 | 38 | 10 |
| <i>THSD7B</i>      | chr2 | 138395226 | G    | T     | -- | -- | Intron | SNP | 0.323 | 21 | 10 |
| --                 | chr2 | 138478673 | C    | A     | -- | -- | IGR    | SNP | 0.550 | 18 | 22 |
| <i>HNMT</i>        | chr2 | 138742766 | C    | A     | -- | -- | Intron | SNP | 0.130 | 20 | 3  |
| --                 | chr2 | 138850194 | C    | G     | -- | -- | IGR    | SNP | 0.467 | 16 | 14 |
| --                 | chr2 | 138901699 | T    | C     | -- | -- | IGR    | SNP | 0.176 | 14 | 3  |
| --                 | chr2 | 139747785 | A    | G     | -- | -- | IGR    | SNP | 0.300 | 21 | 9  |
| --                 | chr2 | 139818335 | G    | A     | -- | -- | IGR    | SNP | 0.333 | 24 | 12 |
| --                 | chr2 | 139839374 | -    | CA    | -- | -- | IGR    | INS | 0.111 | 16 | 2  |
| --                 | chr2 | 140090753 | T    | A     | -- | -- | IGR    | SNP | 0.258 | 23 | 8  |
| --                 | chr2 | 140184867 | A    | T     | -- | -- | IGR    | SNP | 0.438 | 18 | 14 |



|                   |      |           |     |    |        |       |                 |     |       |    |    |
|-------------------|------|-----------|-----|----|--------|-------|-----------------|-----|-------|----|----|
| --                | chr2 | 140383537 | T   | A  | --     | --    | IGR             | SNP | 0.103 | 26 | 3  |
| --                | chr2 | 140588223 | A   | T  | --     | --    | IGR             | SNP | 0.333 | 16 | 8  |
| --                | chr2 | 140716207 | G   | T  | --     | --    | IGR             | SNP | 0.393 | 17 | 11 |
| <i>LRP1B</i>      | chr2 | 141009630 | G   | A  | --     | --    | Intron          | SNP | 0.333 | 8  | 4  |
| <i>LRP1B</i>      | chr2 | 141125482 | T   | C  | --     | --    | Intron          | SNP | 0.516 | 15 | 16 |
| <i>LRP1B</i>      | chr2 | 141196138 | T   | G  | --     | --    | Intron          | SNP | 0.276 | 21 | 8  |
| <i>LRP1B</i>      | chr2 | 141303605 | C   | G  | --     | --    | Intron          | SNP | 0.114 | 31 | 4  |
| <i>LRP1B</i>      | chr2 | 141385335 | C   | T  | --     | --    | Intron          | SNP | 0.273 | 24 | 9  |
| <i>LRP1B</i>      | chr2 | 141398682 | T   | G  | --     | --    | Intron          | SNP | 0.250 | 24 | 8  |
| <i>LRP1B</i>      | chr2 | 141900763 | G   | A  | --     | --    | Intron          | SNP | 0.433 | 17 | 13 |
| <i>LRP1B</i>      | chr2 | 142041186 | A   | C  | --     | --    | Intron          | SNP | 0.250 | 12 | 4  |
| <i>LRP1B</i>      | chr2 | 142086972 | G   | A  | --     | --    | Intron          | SNP | 0.333 | 6  | 3  |
| <i>LRP1B</i>      | chr2 | 142618792 | C   | G  | --     | --    | Intron          | SNP | 0.448 | 16 | 13 |
| <i>LRP1B</i>      | chr2 | 142741760 | G   | T  | --     | --    | Intron          | SNP | 0.250 | 15 | 5  |
| --                | chr2 | 142966757 | G   | T  | --     | --    | IGR             | SNP | 0.667 | 10 | 20 |
| --                | chr2 | 143534071 | C   | A  | --     | --    | IGR             | SNP | 0.216 | 29 | 8  |
| --                | chr2 | 143534072 | T   | A  | --     | --    | IGR             | SNP | 0.216 | 29 | 8  |
| <i>KYNU</i>       | chr2 | 143690665 | C   | G  | --     | --    | Intron          | SNP | 0.487 | 20 | 19 |
| --                | chr2 | 143821566 | AGT | -  | --     | --    | IGR             | DEL | 0.118 | 30 | 4  |
| --                | chr2 | 143849083 | GT  | -  | --     | --    | IGR             | DEL | 0.405 | 22 | 15 |
| --                | chr2 | 143859573 | C   | T  | --     | --    | IGR             | SNP | 0.103 | 26 | 3  |
| <i>ARHGAP15</i>   | chr2 | 143975695 | T   | C  | --     | --    | Intron          | SNP | 0.237 | 29 | 9  |
| <i>ARHGAP15</i>   | chr2 | 144402159 | A   | T  | --     | --    | Intron          | SNP | 0.152 | 28 | 5  |
| --                | chr2 | 145318065 | T   | C  | --     | --    | IGR             | SNP | 0.400 | 9  | 6  |
| <i>DKFZp686O1</i> | chr2 | 145437376 | G   | C  | --     | --    | RNA             | SNP | 0.379 | 18 | 11 |
| <i>DKFZp686O1</i> | chr2 | 145437683 | G   | A  | --     | --    | RNA             | SNP | 0.450 | 22 | 18 |
| <i>DKFZp686O1</i> | chr2 | 145674382 | C   | G  | --     | --    | RNA             | SNP | 0.194 | 25 | 6  |
| --                | chr2 | 145918527 | C   | G  | --     | --    | IGR             | SNP | 0.385 | 24 | 15 |
| --                | chr2 | 145987697 | G   | A  | --     | --    | IGR             | SNP | 0.250 | 21 | 7  |
| --                | chr2 | 145999717 | -   | GC | --     | --    | IGR             | INS | 0.300 | 28 | 12 |
| --                | chr2 | 146250730 | G   | C  | --     | --    | IGR             | SNP | 0.565 | 10 | 13 |
| --                | chr2 | 146270907 | T   | C  | --     | --    | IGR             | SNP | 0.333 | 14 | 7  |
| --                | chr2 | 146344673 | G   | A  | --     | --    | IGR             | SNP | 0.440 | 14 | 11 |
| --                | chr2 | 146418983 | GGT | -  | --     | --    | IGR             | DEL | 0.118 | 15 | 2  |
| --                | chr2 | 146460845 | G   | C  | --     | --    | IGR             | SNP | 0.148 | 23 | 4  |
| --                | chr2 | 146468723 | G   | A  | --     | --    | IGR             | SNP | 0.150 | 17 | 3  |
| --                | chr2 | 146848298 | C   | T  | --     | --    | IGR             | SNP | 0.296 | 19 | 8  |
| --                | chr2 | 147390320 | C   | G  | --     | --    | IGR             | SNP | 0.219 | 25 | 7  |
| --                | chr2 | 147898351 | G   | T  | --     | --    | IGR             | SNP | 0.300 | 14 | 6  |
| --                | chr2 | 148127530 | G   | A  | --     | --    | IGR             | SNP | 0.308 | 9  | 4  |
| --                | chr2 | 148504608 | A   | T  | --     | --    | IGR             | SNP | 0.196 | 37 | 9  |
| <i>MBD5</i>       | chr2 | 148946689 | T   | G  | --     | --    | Intron          | SNP | 0.300 | 7  | 3  |
| <i>MBD5</i>       | chr2 | 149100761 | G   | A  | --     | --    | Intron          | SNP | 0.283 | 33 | 13 |
| <i>MBD5</i>       | chr2 | 149112691 | TTG | -  | --     | --    | Intron          | DEL | 0.125 | 14 | 2  |
| <i>MBD5</i>       | chr2 | 149133855 | G   | T  | --     | --    | Intron          | SNP | 0.286 | 10 | 4  |
| --                | chr2 | 149316185 | A   | G  | --     | --    | IGR             | SNP | 0.212 | 26 | 7  |
| --                | chr2 | 149366132 | G   | C  | --     | --    | IGR             | SNP | 0.324 | 25 | 12 |
| --                | chr2 | 149366709 | G   | A  | --     | --    | IGR             | SNP | 0.344 | 21 | 11 |
| <i>EPC2</i>       | chr2 | 149497353 | T   | A  | --     | --    | Intron          | SNP | 0.433 | 17 | 13 |
| --                | chr2 | 150498765 | T   | G  | --     | --    | IGR             | SNP | 0.250 | 9  | 3  |
| --                | chr2 | 150538721 | A   | G  | --     | --    | IGR             | SNP | 0.610 | 16 | 25 |
| --                | chr2 | 150780153 | G   | T  | --     | --    | IGR             | SNP | 0.350 | 26 | 14 |
| --                | chr2 | 151214480 | A   | G  | --     | --    | IGR             | SNP | 0.387 | 19 | 12 |
| --                | chr2 | 151377405 | T   | C  | --     | --    | IGR             | SNP | 0.204 | 39 | 10 |
| --                | chr2 | 151636328 | T   | A  | --     | --    | IGR             | SNP | 0.103 | 26 | 3  |
| --                | chr2 | 151653402 | T   | C  | --     | --    | IGR             | SNP | 0.692 | 8  | 18 |
| --                | chr2 | 151886402 | G   | C  | --     | --    | IGR             | SNP | 0.417 | 21 | 15 |
| --                | chr2 | 151918444 | C   | G  | --     | --    | IGR             | SNP | 0.476 | 22 | 20 |
| --                | chr2 | 152179680 | C   | T  | --     | --    | IGR             | SNP | 0.424 | 19 | 14 |
| --                | chr2 | 152181524 | T   | A  | --     | --    | IGR             | SNP | 0.143 | 24 | 4  |
| --                | chr2 | 152246751 | G   | C  | --     | --    | IGR             | SNP | 0.380 | 31 | 19 |
| <i>RIF1</i>       | chr2 | 152316540 | G   | C  | G2982C | K994N | Missense_mutati | SNP | 0.619 | 8  | 13 |
| <i>NEB</i>        | chr2 | 152457609 | A   | T  | --     | --    | Intron          | SNP | 0.385 | 8  | 5  |
| --                | chr2 | 152602752 | C   | A  | --     | --    | IGR             | SNP | 0.125 | 21 | 3  |
| --                | chr2 | 152602770 | A   | G  | --     | --    | IGR             | SNP | 0.158 | 16 | 3  |
| <i>CACNB4</i>     | chr2 | 152737840 | G   | T  | --     | --    | Intron          | SNP | 0.208 | 19 | 5  |
| <i>CACNB4</i>     | chr2 | 152871448 | A   | G  | --     | --    | Intron          | SNP | 0.452 | 17 | 14 |
| <i>CACNB4</i>     | chr2 | 152937458 | A   | G  | --     | --    | Intron          | SNP | 0.250 | 27 | 9  |
| --                | chr2 | 152966112 | A   | T  | --     | --    | IGR             | SNP | 0.333 | 6  | 3  |
| --                | chr2 | 153118638 | CA  | -  | --     | --    | IGR             | DEL | 0.290 | 22 | 9  |
| --                | chr2 | 153169108 | C   | A  | --     | --    | IGR             | SNP | 0.208 | 19 | 5  |
| --                | chr2 | 153653867 | G   | T  | --     | --    | IGR             | SNP | 0.103 | 35 | 4  |
| --                | chr2 | 153870801 | AT  | -  | --     | --    | IGR             | DEL | 0.105 | 17 | 2  |
| --                | chr2 | 154005007 | G   | T  | --     | --    | IGR             | SNP | 0.333 | 8  | 4  |
| --                | chr2 | 154113851 | C   | G  | --     | --    | IGR             | SNP | 0.222 | 14 | 4  |
| --                | chr2 | 154168320 | T   | A  | --     | --    | IGR             | SNP | 0.154 | 33 | 6  |
| --                | chr2 | 154497437 | A   | T  | --     | --    | IGR             | SNP | 0.280 | 18 | 7  |
| --                | chr2 | 154576216 | C   | T  | --     | --    | IGR             | SNP | 0.615 | 5  | 8  |
| --                | chr2 | 154640747 | C   | G  | --     | --    | IGR             | SNP | 0.167 | 25 | 5  |
| <i>GALNT13</i>    | chr2 | 155037443 | T   | A  | --     | --    | Intron          | SNP | 0.452 | 17 | 14 |

|         |      |           |      |       |                           |                 |         |       |       |    |    |
|---------|------|-----------|------|-------|---------------------------|-----------------|---------|-------|-------|----|----|
| GALNT13 | chr2 | 155054243 | GT   | -     | --                        | --              | Intron  | DEL   | 0.118 | 15 | 2  |
| GALNT13 | chr2 | 155085920 | G    | A     | --                        | --              | Intron  | SNP   | 0.450 | 11 | 9  |
| --      | chr2 | 155351686 | G    | A     | --                        | --              | IGR     | SNP   | 0.346 | 17 | 9  |
| --      | chr2 | 155482671 | A    | T     | --                        | --              | IGR     | SNP   | 0.353 | 11 | 6  |
| KCNJ3   | chr2 | 155596198 | T    | G     | --                        | --              | Intron  | SNP   | 0.333 | 18 | 9  |
| KCNJ3   | chr2 | 155623264 | C    | T     | --                        | --              | Intron  | SNP   | 0.412 | 10 | 7  |
| KCNJ3   | chr2 | 155624262 | A    | T     | --                        | --              | Intron  | SNP   | 0.417 | 7  | 5  |
| KCNJ3   | chr2 | 155639420 | G    | T     | --                        | --              | Intron  | SNP   | 0.346 | 17 | 9  |
| KCNJ3   | chr2 | 155666724 | A    | T     | --                        | --              | Intron  | SNP   | 0.194 | 25 | 6  |
| --      | chr2 | 155726551 | -    | CT    | --                        | --              | IGR     | INS   | 0.125 | 14 | 2  |
| --      | chr2 | 156328582 | -    | TTTTG | --                        | --              | IGR     | INS   | 0.167 | 15 | 3  |
| --      | chr2 | 156328601 | A    | C     | --                        | --              | IGR     | SNP   | 0.167 | 15 | 3  |
| --      | chr2 | 156397875 | G    | A     | --                        | --              | IGR     | SNP   | 0.500 | 14 | 14 |
| --      | chr2 | 156416683 | A    | G     | --                        | --              | IGR     | SNP   | 0.296 | 19 | 8  |
| --      | chr2 | 156507938 | AAAG | -     | --                        | --              | IGR     | DEL   | 0.105 | 17 | 2  |
| --      | chr2 | 156642068 | A    | C     | --                        | --              | IGR     | SNP   | 0.375 | 10 | 6  |
| --      | chr2 | 156705077 | G    | C     | --                        | --              | IGR     | SNP   | 0.621 | 11 | 18 |
| --      | chr2 | 156970232 | C    | T     | --                        | --              | IGR     | SNP   | 0.348 | 30 | 16 |
| --      | chr2 | 157029261 | C    | A     | --                        | --              | IGR     | SNP   | 0.122 | 36 | 5  |
| --      | chr2 | 157029262 | T    | C     | --                        | --              | IGR     | SNP   | 0.143 | 36 | 6  |
| --      | chr2 | 157143170 | G    | C     | --                        | --              | IGR     | SNP   | 0.606 | 13 | 20 |
| --      | chr2 | 157145917 | G    | C     | --                        | --              | IGR     | SNP   | 0.348 | 15 | 8  |
| GPD2    | chr2 | 157308659 | T    | G     | --                        | --              | Intron  | SNP   | 0.118 | 30 | 4  |
| --      | chr2 | 157494844 | G    | A     | --                        | --              | IGR     | SNP   | 0.538 | 12 | 14 |
| --      | chr2 | 157592105 | T    | A     | --                        | --              | IGR     | SNP   | 0.500 | 13 | 13 |
| --      | chr2 | 157753616 | C    | T     | --                        | --              | IGR     | SNP   | 0.280 | 18 | 7  |
| --      | chr2 | 157786554 | A    | T     | --                        | --              | IGR     | SNP   | 0.176 | 28 | 6  |
| --      | chr2 | 157850862 | T    | C     | --                        | --              | IGR     | SNP   | 0.300 | 7  | 3  |
| CYTIP   | chr2 | 158293772 | C    | T     | --                        | --              | Intron  | SNP   | 0.107 | 25 | 3  |
| ACVR1   | chr2 | 158631403 | GT   | -     | --                        | --              | Intron  | DEL   | 0.115 | 23 | 3  |
| ACVR1   | chr2 | 158728360 | G    | C     | --                        | --              | Intron  | SNP   | 0.262 | 31 | 11 |
| UPP2    | chr2 | 158855979 | C    | A     | --                        | --              | Intron  | SNP   | 0.258 | 23 | 8  |
| UPP2    | chr2 | 158940380 | TTA  | -     | --                        | --              | Intron  | DEL   | 0.125 | 14 | 2  |
| CCDC148 | chr2 | 159151058 | G    | A     | --                        | --              | Intron  | SNP   | 0.111 | 32 | 4  |
| PKP4    | chr2 | 159416107 | C    | A     | --                        | --              | Intron  | SNP   | 0.553 | 17 | 21 |
| PKP4    | chr2 | 159416238 | T    | G     | --                        | --              | Intron  | SNP   | 0.500 | 17 | 17 |
| PKP4    | chr2 | 159533799 | G    | C     | --                        | --              | Intron  | SNP   | 0.659 | 14 | 27 |
| --      | chr2 | 159705271 | C    | G     | --                        | --              | IGR     | SNP   | 0.103 | 35 | 4  |
| --      | chr2 | 159728218 | TA   | -     | --                        | --              | IGR     | DEL   | 0.105 | 17 | 2  |
| BAZ2B   | chr2 | 160303824 | T    | G     | --                        | --              | Intron  | SNP   | 0.303 | 23 | 10 |
| --      | chr2 | 160516245 | A    | G     | --                        | --              | IGR     | SNP   | 0.422 | 26 | 19 |
| RBMS1   | chr2 | 161179206 | G    | C     | --                        | --              | Intron  | SNP   | 0.576 | 14 | 19 |
| --      | chr2 | 161455057 | G    | C     | --                        | --              | IGR     | SNP   | 0.500 | 21 | 21 |
| --      | chr2 | 161503604 | A    | C     | --                        | --              | IGR     | SNP   | 0.484 | 16 | 15 |
| --      | chr2 | 161719913 | G    | T     | --                        | --              | IGR     | SNP   | 0.313 | 22 | 10 |
| --      | chr2 | 161986821 | C    | T     | --                        | --              | IGR     | SNP   | 0.636 | 12 | 21 |
| --      | chr2 | 162143360 | C    | A     | --                        | --              | IGR     | SNP   | 0.217 | 18 | 5  |
| SLC4A10 | chr2 | 162545740 | A    | G     | --                        | --              | Intron  | SNP   | 0.413 | 27 | 19 |
| SLC4A10 | chr2 | 162767166 | G    | A     | --                        | --              | Intron  | SNP   | 0.464 | 15 | 13 |
| SLC4A10 | chr2 | 162794795 | A    | T     | --                        | --              | Intron  | SNP   | 0.500 | 10 | 10 |
| SLC4A10 | chr2 | 162811033 | C    | G     | --                        | --              | Intron  | SNP   | 0.581 | 13 | 18 |
| SLC4A10 | chr2 | 162820762 | C    | T     | C2923T,C298(L975F,L994F,I | Missense_mutati | SNP     | 0.400 | 15    | 10 |    |
| --      | chr2 | 163192482 | G    | C     | --                        | --              | IGR     | SNP   | 0.433 | 17 | 13 |
| KCNH7   | chr2 | 163313753 | C    | A     | --                        | --              | Intron  | SNP   | 0.148 | 23 | 4  |
| --      | chr2 | 163806283 | G    | A     | --                        | --              | IGR     | SNP   | 0.207 | 23 | 6  |
| --      | chr2 | 164044139 | G    | C     | --                        | --              | IGR     | SNP   | 0.425 | 23 | 17 |
| --      | chr2 | 164116966 | G    | C     | --                        | --              | IGR     | SNP   | 0.350 | 13 | 7  |
| --      | chr2 | 164443961 | A    | C     | --                        | --              | IGR     | SNP   | 0.171 | 34 | 7  |
| FIGN    | chr2 | 164574046 | A    | T     | --                        | --              | Intron  | SNP   | 0.273 | 16 | 6  |
| --      | chr2 | 164733730 | TC   | -     | --                        | --              | IGR     | DEL   | 0.240 | 19 | 6  |
| --      | chr2 | 164742137 | C    | A     | --                        | --              | IGR     | SNP   | 0.313 | 22 | 10 |
| --      | chr2 | 164809164 | AAAG | -     | --                        | --              | IGR     | DEL   | 0.133 | 13 | 2  |
| --      | chr2 | 164817636 | G    | A     | --                        | --              | IGR     | SNP   | 0.364 | 21 | 12 |
| --      | chr2 | 164825129 | T    | A     | --                        | --              | IGR     | SNP   | 0.667 | 1  | 2  |
| --      | chr2 | 164843109 | G    | T     | --                        | --              | IGR     | SNP   | 0.138 | 25 | 4  |
| --      | chr2 | 164944222 | G    | C     | --                        | --              | IGR     | SNP   | 0.333 | 6  | 3  |
| --      | chr2 | 164992411 | A    | T     | --                        | --              | IGR     | SNP   | 0.375 | 15 | 9  |
| --      | chr2 | 165275695 | G    | T     | --                        | --              | IGR     | SNP   | 0.281 | 23 | 9  |
| --      | chr2 | 165342285 | C    | T     | --                        | --              | IGR     | SNP   | 0.243 | 28 | 9  |
| GRB14   | chr2 | 165349199 | A    | C     | --                        | --              | 3'Flank | SNP   | 0.360 | 16 | 9  |
| GRB14   | chr2 | 165434521 | G    | A     | --                        | --              | Intron  | SNP   | 0.250 | 15 | 5  |
| COBLL1  | chr2 | 165578274 | G    | A     | --                        | --              | Intron  | SNP   | 0.185 | 22 | 5  |
| --      | chr2 | 165886402 | T    | C     | --                        | --              | IGR     | SNP   | 0.273 | 16 | 6  |
| SCN3A   | chr2 | 166021315 | T    | G     | --                        | --              | Intron  | SNP   | 0.531 | 15 | 17 |
| --      | chr2 | 166084524 | A    | T     | --                        | --              | IGR     | SNP   | 0.174 | 19 | 4  |
| SCN2A   | chr2 | 166150549 | G    | T     | --                        | --              | 5'UTR   | SNP   | 0.444 | 5  | 4  |
| CSRNP3  | chr2 | 166346245 | AC   | -     | --                        | --              | Intron  | DEL   | 0.118 | 15 | 2  |
| --      | chr2 | 166690470 | A    | C     | --                        | --              | IGR     | SNP   | 0.364 | 14 | 8  |
| SCN1A   | chr2 | 166897734 | T    | C     | --                        | --              | Intron  | SNP   | 0.333 | 20 | 10 |
| SCN1A   | chr2 | 166897735 | G    | A     | --                        | --              | Intron  | SNP   | 0.333 | 20 | 10 |

|          |      |           |     |    |              |             |                 |     |       |    |    |
|----------|------|-----------|-----|----|--------------|-------------|-----------------|-----|-------|----|----|
| --       | chr2 | 167011911 | A   | G  | --           | --          | IGR             | SNP | 0.371 | 22 | 13 |
| SCN9A    | chr2 | 167233220 | A   | -  | --           | --          | 5'Flank         | DEL | 0.444 | 15 | 12 |
| SCN7A    | chr2 | 167263524 | T   | C  | --           | --          | Intron          | SNP | 0.389 | 22 | 14 |
| --       | chr2 | 167712448 | T   | G  | --           | --          | IGR             | SNP | 0.333 | 8  | 4  |
| --       | chr2 | 167714022 | C   | T  | --           | --          | IGR             | SNP | 0.533 | 7  | 8  |
| XIRP2    | chr2 | 167903161 | T   | A  | --           | --          | Intron          | SNP | 0.405 | 25 | 17 |
| XIRP2    | chr2 | 167903227 | G   | A  | --           | --          | Intron          | SNP | 0.279 | 31 | 12 |
| XIRP2    | chr2 | 167921822 | G   | A  | --           | --          | Intron          | SNP | 0.500 | 16 | 16 |
| XIRP2    | chr2 | 167988937 | A   | T  | --           | --          | Intron          | SNP | 0.271 | 35 | 13 |
| XIRP2    | chr2 | 167997627 | G   | C  | --           | --          | Intron          | SNP | 0.313 | 22 | 10 |
| XIRP2    | chr2 | 168040302 | C   | T  | --           | --          | Intron          | SNP | 0.625 | 9  | 15 |
| XIRP2    | chr2 | 168041117 | C   | T  | C628T        | P210S       | Missense_mutati | SNP | 0.426 | 27 | 20 |
| --       | chr2 | 168233262 | T   | A  | --           | --          | IGR             | SNP | 0.152 | 28 | 5  |
| --       | chr2 | 168233263 | A   | G  | --           | --          | IGR             | SNP | 0.152 | 28 | 5  |
| --       | chr2 | 168343633 | A   | T  | --           | --          | IGR             | SNP | 0.314 | 24 | 11 |
| --       | chr2 | 168367573 | T   | C  | --           | --          | IGR             | SNP | 0.333 | 18 | 9  |
| --       | chr2 | 168534062 | G   | C  | --           | --          | IGR             | SNP | 0.382 | 21 | 13 |
| STK39    | chr2 | 169028545 | T   | G  | --           | --          | Intron          | SNP | 0.156 | 27 | 5  |
| CERS6    | chr2 | 169419066 | T   | A  | --           | --          | Intron          | SNP | 0.170 | 39 | 8  |
| LRP2     | chr2 | 170064212 | G   | A  | --           | --          | Intron          | SNP | 0.394 | 20 | 13 |
| LRP2     | chr2 | 170170587 | C   | A  | --           | --          | Intron          | SNP | 0.412 | 20 | 14 |
| LRP2     | chr2 | 170182141 | G   | T  | --           | --          | Intron          | SNP | 0.581 | 13 | 18 |
| --       | chr2 | 170220958 | C   | A  | --           | --          | IGR             | SNP | 0.121 | 29 | 4  |
| --       | chr2 | 170320369 | ATG | -  | --           | --          | IGR             | DEL | 0.143 | 12 | 2  |
| PPIG     | chr2 | 170473439 | G   | A  | --           | --          | Intron          | SNP | 0.190 | 17 | 4  |
| PPIG     | chr2 | 170473467 | A   | C  | --           | --          | Intron          | SNP | 0.160 | 21 | 4  |
| UBR3     | chr2 | 170715107 | G   | C  | --           | --          | Intron          | SNP | 0.550 | 9  | 11 |
| UBR3     | chr2 | 170756607 | A   | G  | --           | --          | Intron          | SNP | 0.136 | 19 | 3  |
| MYO3B    | chr2 | 171381878 | C   | G  | --           | --          | Intron          | SNP | 0.340 | 31 | 16 |
| MYO3B    | chr2 | 171450493 | T   | G  | --           | --          | Intron          | SNP | 0.319 | 32 | 15 |
| TLK1     | chr2 | 171976758 | G   | A  | --           | --          | Intron          | SNP | 0.308 | 9  | 4  |
| TLK1     | chr2 | 171979230 | A   | T  | --           | --          | Intron          | SNP | 0.359 | 25 | 14 |
| TLK1     | chr2 | 171997027 | G   | A  | --           | --          | Intron          | SNP | 0.455 | 18 | 15 |
| --       | chr2 | 172112143 | C   | T  | --           | --          | IGR             | SNP | 0.320 | 34 | 16 |
| --       | chr2 | 172632432 | G   | A  | --           | --          | IGR             | SNP | 0.313 | 22 | 10 |
| SLC25A12 | chr2 | 172644835 | T   | A  | --           | --          | Intron          | SNP | 0.444 | 15 | 12 |
| SLC25A12 | chr2 | 172722352 | C   | A  | --           | --          | Intron          | SNP | 0.190 | 17 | 4  |
| HAT1     | chr2 | 172828760 | T   | G  | --           | --          | Intron          | SNP | 0.125 | 21 | 3  |
| --       | chr2 | 173064498 | C   | T  | --           | --          | IGR             | SNP | 0.314 | 24 | 11 |
| --       | chr2 | 173187743 | C   | A  | --           | --          | IGR             | SNP | 0.327 | 33 | 16 |
| ITGA6    | chr2 | 173310082 | C   | A  | --           | --          | Intron          | SNP | 0.500 | 5  | 5  |
| --       | chr2 | 173470121 | G   | T  | --           | --          | IGR             | SNP | 0.250 | 12 | 4  |
| --       | chr2 | 173564360 | T   | A  | --           | --          | IGR             | SNP | 0.143 | 30 | 5  |
| --       | chr2 | 174246523 | T   | G  | --           | --          | IGR             | SNP | 0.179 | 32 | 7  |
| --       | chr2 | 174501957 | TTA | -  | --           | --          | IGR             | DEL | 0.111 | 16 | 2  |
| --       | chr2 | 174832814 | -   | CA | --           | --          | IGR             | INS | 0.326 | 29 | 14 |
| OLA1     | chr2 | 175107279 | G   | T  | --           | --          | Intron          | SNP | 0.288 | 37 | 15 |
| --       | chr2 | 175128186 | G   | C  | --           | --          | IGR             | SNP | 0.308 | 9  | 4  |
| --       | chr2 | 175589851 | C   | A  | --           | --          | IGR             | SNP | 0.568 | 16 | 21 |
| --       | chr2 | 176122084 | C   | T  | --           | --          | IGR             | SNP | 0.385 | 8  | 5  |
| --       | chr2 | 176344124 | G   | A  | --           | --          | IGR             | SNP | 0.529 | 16 | 18 |
| --       | chr2 | 176484731 | C   | A  | --           | --          | IGR             | SNP | 0.238 | 16 | 5  |
| --       | chr2 | 176494796 | C   | T  | --           | --          | IGR             | SNP | 0.600 | 12 | 18 |
| --       | chr2 | 176568346 | C   | T  | --           | --          | IGR             | SNP | 0.143 | 18 | 3  |
| --       | chr2 | 176871183 | C   | G  | --           | --          | IGR             | SNP | 0.412 | 10 | 7  |
| --       | chr2 | 176894597 | G   | T  | --           | --          | IGR             | SNP | 0.536 | 13 | 15 |
| --       | chr2 | 177130471 | T   | C  | --           | --          | IGR             | SNP | 0.459 | 20 | 17 |
| --       | chr2 | 177398064 | T   | A  | --           | --          | IGR             | SNP | 0.190 | 47 | 11 |
| --       | chr2 | 177534085 | G   | A  | --           | --          | IGR             | SNP | 0.119 | 37 | 5  |
| --       | chr2 | 177693980 | T   | A  | --           | --          | IGR             | SNP | 0.343 | 23 | 12 |
| PDE11A   | chr2 | 178844221 | C   | T  | --           | --          | Intron          | SNP | 0.273 | 24 | 9  |
| --       | chr2 | 179020039 | C   | T  | --           | --          | IGR             | SNP | 0.208 | 19 | 5  |
| --       | chr2 | 179021849 | C   | G  | --           | --          | IGR             | SNP | 0.194 | 25 | 6  |
| OSBPL6   | chr2 | 179222924 | G   | A  | --           | --          | Intron          | SNP | 0.400 | 12 | 8  |
| TTN      | chr2 | 179397571 | G   | A  | C76951T,C777 | R25651X,R25 | Nonsense_mutat  | SNP | 0.320 | 34 | 16 |
| TTN      | chr2 | 179572405 | A   | T  | T25157A      | I8386K      | Missense_mutati | SNP | 0.333 | 18 | 9  |
| TTN      | chr2 | 179627000 | G   | C  | --           | --          | Intron          | SNP | 0.630 | 10 | 17 |
| CCDC141  | chr2 | 179787835 | T   | C  | --           | --          | Intron          | SNP | 0.143 | 18 | 3  |
| CCDC141  | chr2 | 179850529 | A   | C  | --           | --          | Intron          | SNP | 0.200 | 12 | 3  |
| CCDC141  | chr2 | 179850530 | G   | T  | --           | --          | Intron          | SNP | 0.200 | 12 | 3  |
| CCDC141  | chr2 | 179877575 | G   | A  | --           | --          | Intron          | SNP | 0.639 | 13 | 23 |
| --       | chr2 | 179919486 | TA  | -  | --           | --          | IGR             | DEL | 0.129 | 27 | 4  |
| ZNF385B  | chr2 | 180422466 | A   | G  | --           | --          | Intron          | SNP | 0.391 | 14 | 9  |
| ZNF385B  | chr2 | 180528785 | AAT | -  | --           | --          | Intron          | DEL | 0.111 | 16 | 2  |
| CWC22    | chr2 | 180819943 | T   | G  | --           | --          | Intron          | SNP | 0.138 | 25 | 4  |
| --       | chr2 | 180893005 | C   | A  | --           | --          | IGR             | SNP | 0.500 | 11 | 11 |
| --       | chr2 | 180917701 | C   | A  | --           | --          | IGR             | SNP | 0.333 | 6  | 3  |
| --       | chr2 | 181411229 | G   | A  | --           | --          | IGR             | SNP | 0.684 | 6  | 13 |
| --       | chr2 | 182080485 | C   | A  | --           | --          | IGR             | SNP | 0.333 | 24 | 12 |
| --       | chr2 | 182150685 | A   | C  | --           | --          | IGR             | SNP | 0.233 | 23 | 7  |

|         |      |           |       |       |    |    |         |     |       |    |    |
|---------|------|-----------|-------|-------|----|----|---------|-----|-------|----|----|
| MIR4437 | chr2 | 182170739 | C     | T     | -- | -- | 5'Flank | SNP | 0.324 | 25 | 12 |
| --      | chr2 | 182228290 | T     | A     | -- | -- | IGR     | SNP | 0.333 | 16 | 8  |
| --      | chr2 | 182273869 | A     | T     | -- | -- | IGR     | SNP | 0.321 | 19 | 9  |
| --      | chr2 | 182290550 | G     | A     | -- | -- | IGR     | SNP | 0.342 | 25 | 13 |
| ITGA4   | chr2 | 182359313 | G     | C     | -- | -- | Intron  | SNP | 0.382 | 21 | 13 |
| --      | chr2 | 182669336 | G     | T     | -- | -- | IGR     | SNP | 0.340 | 31 | 16 |
| --      | chr2 | 182811189 | -     | TTCAA | -- | -- | IGR     | INS | 0.321 | 19 | 9  |
| --      | chr2 | 182829424 | AT    | -     | -- | -- | IGR     | DEL | 0.133 | 13 | 2  |
| PPP1R1C | chr2 | 182862435 | C     | T     | -- | -- | Intron  | SNP | 0.686 | 11 | 24 |
| PPP1R1C | chr2 | 182898341 | T     | C     | -- | -- | Intron  | SNP | 0.609 | 9  | 14 |
| PDE1A   | chr2 | 183100274 | G     | A     | -- | -- | Intron  | SNP | 0.469 | 17 | 15 |
| PDE1A   | chr2 | 183320292 | C     | T     | -- | -- | Intron  | SNP | 0.111 | 24 | 3  |
| --      | chr2 | 183426973 | T     | G     | -- | -- | IGR     | SNP | 0.417 | 7  | 5  |
| --      | chr2 | 183766092 | G     | C     | -- | -- | IGR     | SNP | 0.563 | 7  | 9  |
| --      | chr2 | 184344089 | G     | A     | -- | -- | IGR     | SNP | 0.786 | 3  | 11 |
| --      | chr2 | 184637504 | T     | A     | -- | -- | IGR     | SNP | 0.158 | 16 | 3  |
| --      | chr2 | 184674153 | C     | A     | -- | -- | IGR     | SNP | 0.357 | 18 | 10 |
| --      | chr2 | 184714304 | C     | T     | -- | -- | IGR     | SNP | 0.115 | 23 | 3  |
| --      | chr2 | 184777166 | C     | A     | -- | -- | IGR     | SNP | 0.382 | 21 | 13 |
| --      | chr2 | 184777167 | C     | A     | -- | -- | IGR     | SNP | 0.382 | 21 | 13 |
| --      | chr2 | 184891157 | C     | A     | -- | -- | IGR     | SNP | 0.231 | 10 | 3  |
| --      | chr2 | 185149880 | A     | G     | -- | -- | IGR     | SNP | 0.400 | 12 | 8  |
| --      | chr2 | 185175962 | A     | G     | -- | -- | IGR     | SNP | 0.462 | 14 | 12 |
| --      | chr2 | 185190791 | G     | A     | -- | -- | IGR     | SNP | 0.366 | 26 | 15 |
| --      | chr2 | 185350803 | C     | A     | -- | -- | IGR     | SNP | 0.216 | 29 | 8  |
| --      | chr2 | 185353192 | C     | A     | -- | -- | IGR     | SNP | 0.667 | 8  | 16 |
| ZNF804A | chr2 | 185730477 | T     | C     | -- | -- | Intron  | SNP | 0.344 | 21 | 11 |
| ZNF804A | chr2 | 185730490 | A     | C     | -- | -- | Intron  | SNP | 0.333 | 16 | 8  |
| ZNF804A | chr2 | 185757233 | A     | T     | -- | -- | Intron  | SNP | 0.214 | 11 | 3  |
| --      | chr2 | 185915889 | A     | G     | -- | -- | IGR     | SNP | 0.217 | 18 | 5  |
| --      | chr2 | 185915890 | G     | T     | -- | -- | IGR     | SNP | 0.217 | 18 | 5  |
| --      | chr2 | 186055864 | GTA   | -     | -- | -- | IGR     | DEL | 0.333 | 12 | 6  |
| --      | chr2 | 186151136 | T     | C     | -- | -- | IGR     | SNP | 0.348 | 15 | 8  |
| --      | chr2 | 186289762 | A     | C     | -- | -- | IGR     | SNP | 0.333 | 8  | 4  |
| --      | chr2 | 186355755 | C     | T     | -- | -- | IGR     | SNP | 0.320 | 17 | 8  |
| --      | chr2 | 186433956 | T     | A     | -- | -- | IGR     | SNP | 0.103 | 26 | 3  |
| --      | chr2 | 186598246 | G     | A     | -- | -- | IGR     | SNP | 0.250 | 21 | 7  |
| --      | chr2 | 186782527 | T     | A     | -- | -- | IGR     | SNP | 0.205 | 31 | 8  |
| --      | chr2 | 187040503 | T     | A     | -- | -- | IGR     | SNP | 0.321 | 19 | 9  |
| --      | chr2 | 187117313 | T     | C     | -- | -- | IGR     | SNP | 0.188 | 13 | 3  |
| --      | chr2 | 187117356 | A     | T     | -- | -- | IGR     | SNP | 0.200 | 12 | 3  |
| --      | chr2 | 187142379 | G     | A     | -- | -- | IGR     | SNP | 0.267 | 22 | 8  |
| --      | chr2 | 187346302 | T     | A     | -- | -- | IGR     | SNP | 0.200 | 32 | 8  |
| ZC3H15  | chr2 | 187368104 | C     | G     | -- | -- | Intron  | SNP | 0.606 | 13 | 20 |
| FAM171B | chr2 | 187601296 | A     | G     | -- | -- | Intron  | SNP | 0.273 | 8  | 3  |
| --      | chr2 | 187871982 | G     | A     | -- | -- | IGR     | SNP | 0.474 | 10 | 9  |
| --      | chr2 | 188029203 | TTG   | -     | -- | -- | IGR     | DEL | 0.200 | 12 | 3  |
| --      | chr2 | 188160531 | C     | T     | -- | -- | IGR     | SNP | 0.148 | 23 | 4  |
| CALCRL  | chr2 | 188261123 | T     | G     | -- | -- | Intron  | SNP | 0.400 | 15 | 10 |
| CALCRL  | chr2 | 188287549 | C     | G     | -- | -- | Intron  | SNP | 0.182 | 27 | 6  |
| CALCRL  | chr2 | 188297205 | TC    | -     | -- | -- | Intron  | DEL | 0.185 | 22 | 5  |
| --      | chr2 | 188424879 | G     | A     | -- | -- | IGR     | SNP | 0.103 | 35 | 4  |
| --      | chr2 | 188510935 | A     | T     | -- | -- | IGR     | SNP | 0.524 | 10 | 11 |
| --      | chr2 | 188511679 | G     | C     | -- | -- | IGR     | SNP | 0.108 | 33 | 4  |
| --      | chr2 | 188536885 | G     | A     | -- | -- | IGR     | SNP | 0.136 | 19 | 3  |
| --      | chr2 | 188598062 | -     | CTCT  | -- | -- | IGR     | INS | 0.118 | 15 | 2  |
| --      | chr2 | 188645886 | G     | C     | -- | -- | IGR     | SNP | 0.357 | 18 | 10 |
| --      | chr2 | 188735189 | C     | T     | -- | -- | IGR     | SNP | 0.190 | 17 | 4  |
| --      | chr2 | 188774184 | C     | A     | -- | -- | IGR     | SNP | 0.222 | 21 | 6  |
| --      | chr2 | 188890386 | G     | T     | -- | -- | IGR     | SNP | 0.143 | 30 | 5  |
| --      | chr2 | 189087409 | A     | C     | -- | -- | IGR     | SNP | 0.400 | 21 | 14 |
| --      | chr2 | 189526571 | G     | C     | -- | -- | IGR     | SNP | 0.500 | 13 | 13 |
| --      | chr2 | 189592645 | G     | C     | -- | -- | IGR     | SNP | 0.659 | 14 | 27 |
| DIRC1   | chr2 | 189649396 | G     | C     | -- | -- | Intron  | SNP | 0.200 | 20 | 5  |
| --      | chr2 | 189689839 | GGTTA | -     | -- | -- | IGR     | DEL | 0.111 | 16 | 2  |
| --      | chr2 | 189698631 | C     | G     | -- | -- | IGR     | SNP | 0.576 | 14 | 19 |
| --      | chr2 | 189702724 | A     | T     | -- | -- | IGR     | SNP | 0.500 | 15 | 15 |
| --      | chr2 | 189882036 | G     | A     | -- | -- | IGR     | SNP | 0.333 | 26 | 13 |
| --      | chr2 | 190383817 | C     | T     | -- | -- | IGR     | SNP | 0.484 | 16 | 15 |
| --      | chr2 | 190417802 | G     | A     | -- | -- | IGR     | SNP | 0.303 | 23 | 10 |
| ANKAR   | chr2 | 190592249 | C     | A     | -- | -- | Intron  | SNP | 0.364 | 7  | 4  |
| --      | chr2 | 190863497 | C     | T     | -- | -- | IGR     | SNP | 0.286 | 10 | 4  |
| --      | chr2 | 190995579 | C     | T     | -- | -- | IGR     | SNP | 0.429 | 20 | 15 |
| C2orf88 | chr2 | 191050038 | G     | C     | -- | -- | Intron  | SNP | 0.542 | 11 | 13 |
| HIBCH   | chr2 | 191082074 | G     | C     | -- | -- | Intron  | SNP | 0.283 | 33 | 13 |
| --      | chr2 | 191206535 | G     | C     | -- | -- | IGR     | SNP | 0.419 | 25 | 18 |
| MFSD6   | chr2 | 191322034 | T     | C     | -- | -- | Intron  | SNP | 0.410 | 23 | 16 |
| --      | chr2 | 191506589 | G     | C     | -- | -- | IGR     | SNP | 0.176 | 28 | 6  |
| --      | chr2 | 191603221 | G     | T     | -- | -- | IGR     | SNP | 0.276 | 21 | 8  |
| --      | chr2 | 192766331 | G     | A     | -- | -- | IGR     | SNP | 0.265 | 25 | 9  |

|                  |      |           |     |     |    |    |        |     |       |    |    |
|------------------|------|-----------|-----|-----|----|----|--------|-----|-------|----|----|
| --               | chr2 | 193181028 | AAT | -   | -- | -- | IGR    | DEL | 0.143 | 12 | 2  |
| --               | chr2 | 193375443 | G   | A   | -- | -- | IGR    | SNP | 0.125 | 28 | 4  |
| --               | chr2 | 193468355 | G   | T   | -- | -- | IGR    | SNP | 0.235 | 13 | 4  |
| --               | chr2 | 193878618 | A   | T   | -- | -- | IGR    | SNP | 0.462 | 14 | 12 |
| --               | chr2 | 193983099 | G   | T   | -- | -- | IGR    | SNP | 0.367 | 19 | 11 |
| --               | chr2 | 194007500 | T   | C   | -- | -- | IGR    | SNP | 0.143 | 24 | 4  |
| --               | chr2 | 194243569 | A   | T   | -- | -- | IGR    | SNP | 0.419 | 18 | 13 |
| --               | chr2 | 194439593 | G   | A   | -- | -- | IGR    | SNP | 0.444 | 20 | 16 |
| --               | chr2 | 194514623 | C   | T   | -- | -- | IGR    | SNP | 0.231 | 10 | 3  |
| --               | chr2 | 194551926 | T   | C   | -- | -- | IGR    | SNP | 0.386 | 27 | 17 |
| --               | chr2 | 194733544 | C   | T   | -- | -- | IGR    | SNP | 0.429 | 28 | 21 |
| --               | chr2 | 195040800 | C   | T   | -- | -- | IGR    | SNP | 0.273 | 40 | 15 |
| --               | chr2 | 195046700 | A   | G   | -- | -- | IGR    | SNP | 0.484 | 16 | 15 |
| --               | chr2 | 195149682 | T   | A   | -- | -- | IGR    | SNP | 0.231 | 30 | 9  |
| --               | chr2 | 195887113 | G   | A   | -- | -- | IGR    | SNP | 0.192 | 21 | 5  |
| --               | chr2 | 195895038 | G   | A   | -- | -- | IGR    | SNP | 0.148 | 23 | 4  |
| --               | chr2 | 195941384 | C   | T   | -- | -- | IGR    | SNP | 0.111 | 32 | 4  |
| --               | chr2 | 195941391 | C   | A   | -- | -- | IGR    | SNP | 0.114 | 31 | 4  |
| --               | chr2 | 195941402 | -   | TA  | -- | -- | IGR    | INS | 0.105 | 34 | 4  |
| --               | chr2 | 195941420 | C   | G   | -- | -- | IGR    | SNP | 0.114 | 31 | 4  |
| --               | chr2 | 196084958 | A   | C   | -- | -- | IGR    | SNP | 0.276 | 21 | 8  |
| --               | chr2 | 196321043 | G   | T   | -- | -- | IGR    | SNP | 0.341 | 27 | 14 |
| --               | chr2 | 196403399 | A   | T   | -- | -- | IGR    | SNP | 0.286 | 25 | 10 |
| --               | chr2 | 196428324 | -   | CA  | -- | -- | IGR    | INS | 0.189 | 30 | 7  |
| <i>DNAH7</i>     | chr2 | 196617940 | G   | C   | -- | -- | Intron | SNP | 0.345 | 19 | 10 |
| <i>DNAH7</i>     | chr2 | 196753858 | ATG | -   | -- | -- | Intron | DEL | 0.120 | 22 | 3  |
| <i>HECW2</i>     | chr2 | 197387582 | -   | AC  | -- | -- | Intron | INS | 0.136 | 19 | 3  |
| <i>CCDC150</i>   | chr2 | 197591731 | A   | C   | -- | -- | Intron | SNP | 0.769 | 6  | 20 |
| --               | chr2 | 197598708 | C   | A   | -- | -- | IGR    | SNP | 0.250 | 12 | 4  |
| --               | chr2 | 197681977 | G   | T   | -- | -- | IGR    | SNP | 0.333 | 6  | 3  |
| --               | chr2 | 198221743 | C   | A   | -- | -- | IGR    | SNP | 0.278 | 26 | 10 |
| --               | chr2 | 198221744 | A   | C   | -- | -- | IGR    | SNP | 0.286 | 25 | 10 |
| <i>RFTN2</i>     | chr2 | 198532925 | T   | A   | -- | -- | Intron | SNP | 0.467 | 32 | 28 |
| <i>PLCL1</i>     | chr2 | 198689281 | T   | G   | -- | -- | Intron | SNP | 0.391 | 14 | 9  |
| <i>PLCL1</i>     | chr2 | 198859446 | C   | T   | -- | -- | Intron | SNP | 0.269 | 19 | 7  |
| <i>PLCL1</i>     | chr2 | 198982813 | G   | C   | -- | -- | Intron | SNP | 0.167 | 25 | 5  |
| --               | chr2 | 199019473 | C   | T   | -- | -- | IGR    | SNP | 0.346 | 17 | 9  |
| --               | chr2 | 199166394 | C   | T   | -- | -- | IGR    | SNP | 0.261 | 17 | 6  |
| --               | chr2 | 199181763 | A   | G   | -- | -- | IGR    | SNP | 0.135 | 32 | 5  |
| --               | chr2 | 199387653 | T   | A   | -- | -- | IGR    | SNP | 0.359 | 25 | 14 |
| --               | chr2 | 199395335 | G   | T   | -- | -- | IGR    | SNP | 0.222 | 14 | 4  |
| --               | chr2 | 199405707 | G   | T   | -- | -- | IGR    | SNP | 0.323 | 21 | 10 |
| --               | chr2 | 199568691 | A   | G   | -- | -- | IGR    | SNP | 0.351 | 24 | 13 |
| --               | chr2 | 199568782 | G   | A   | -- | -- | IGR    | SNP | 0.565 | 10 | 13 |
| --               | chr2 | 199700756 | C   | G   | -- | -- | IGR    | SNP | 0.273 | 8  | 3  |
| --               | chr2 | 199746458 | -   | ATG | -- | -- | IGR    | INS | 0.222 | 28 | 8  |
| --               | chr2 | 199944150 | T   | A   | -- | -- | IGR    | SNP | 0.450 | 11 | 9  |
| --               | chr2 | 200009671 | G   | C   | -- | -- | IGR    | SNP | 0.375 | 20 | 12 |
| <i>SATB2</i>     | chr2 | 200172679 | T   | A   | -- | -- | Intron | SNP | 0.355 | 20 | 11 |
| <i>SATB2</i>     | chr2 | 200256183 | C   | A   | -- | -- | Intron | SNP | 0.200 | 16 | 4  |
| <i>SATB2</i>     | chr2 | 200272475 | A   | G   | -- | -- | Intron | SNP | 0.148 | 23 | 4  |
| <i>SATB2</i>     | chr2 | 200329157 | GCA | -   | -- | -- | Intron | DEL | 0.160 | 21 | 4  |
| <i>FONG</i>      | chr2 | 200634031 | C   | T   | -- | -- | RNA    | SNP | 0.386 | 27 | 17 |
| --               | chr2 | 201113376 | G   | C   | -- | -- | IGR    | SNP | 0.375 | 20 | 12 |
| --               | chr2 | 201113825 | G   | A   | -- | -- | IGR    | SNP | 0.269 | 19 | 7  |
| --               | chr2 | 201114262 | G   | T   | -- | -- | IGR    | SNP | 0.222 | 14 | 4  |
| --               | chr2 | 201131653 | G   | C   | -- | -- | IGR    | SNP | 0.333 | 24 | 12 |
| <i>SPATS2L</i>   | chr2 | 201180600 | G   | A   | -- | -- | Intron | SNP | 0.235 | 13 | 4  |
| <i>AOX1</i>      | chr2 | 201519982 | T   | G   | -- | -- | Intron | SNP | 0.634 | 15 | 26 |
| --               | chr2 | 201667178 | G   | T   | -- | -- | IGR    | SNP | 0.300 | 7  | 3  |
| <i>FAM126B</i>   | chr2 | 201907822 | C   | T   | -- | -- | Intron | SNP | 0.158 | 16 | 3  |
| <i>NDUFB3</i>    | chr2 | 201945446 | G   | T   | -- | -- | Intron | SNP | 0.250 | 9  | 3  |
| <i>CFLAR-AS1</i> | chr2 | 202010173 | T   | A   | -- | -- | RNA    | SNP | 0.333 | 30 | 15 |
| --               | chr2 | 202668410 | C   | T   | -- | -- | IGR    | SNP | 0.333 | 8  | 4  |
| <i>SUMO1</i>     | chr2 | 203102520 | G   | C   | -- | -- | Intron | SNP | 0.395 | 23 | 15 |
| <i>BMPR2</i>     | chr2 | 203304475 | TC  | -   | -- | -- | Intron | DEL | 0.125 | 21 | 3  |
| <i>BMPR2</i>     | chr2 | 203364805 | A   | C   | -- | -- | Intron | SNP | 0.349 | 28 | 15 |
| --               | chr2 | 203438764 | C   | G   | -- | -- | IGR    | SNP | 0.333 | 24 | 12 |
| --               | chr2 | 205045785 | G   | A   | -- | -- | IGR    | SNP | 0.306 | 25 | 11 |
| --               | chr2 | 205399894 | T   | A   | -- | -- | IGR    | SNP | 0.429 | 24 | 18 |
| <i>PARD3B</i>    | chr2 | 205585099 | C   | T   | -- | -- | Intron | SNP | 0.545 | 10 | 12 |
| <i>PARD3B</i>    | chr2 | 205628173 | C   | A   | -- | -- | Intron | SNP | 0.378 | 23 | 14 |
| <i>PARD3B</i>    | chr2 | 205735321 | C   | A   | -- | -- | Intron | SNP | 0.419 | 18 | 13 |
| <i>PARD3B</i>    | chr2 | 205936979 | C   | T   | -- | -- | Intron | SNP | 0.167 | 15 | 3  |
| <i>PARD3B</i>    | chr2 | 206062192 | G   | A   | -- | -- | Intron | SNP | 0.333 | 22 | 11 |
| <i>PARD3B</i>    | chr2 | 206206234 | G   | A   | -- | -- | Intron | SNP | 0.342 | 25 | 13 |
| <i>NRP2</i>      | chr2 | 206604727 | C   | G   | -- | -- | Intron | SNP | 0.300 | 28 | 12 |
| <i>NRP2</i>      | chr2 | 206655696 | G   | T   | -- | -- | Intron | SNP | 0.333 | 30 | 15 |
| <i>ADAM23</i>    | chr2 | 207427241 | C   | T   | -- | -- | Intron | SNP | 0.261 | 17 | 6  |
| <i>DYTN</i>      | chr2 | 207535782 | C   | G   | -- | -- | Intron | SNP | 0.686 | 11 | 24 |

|         |      |           |          |    |    |    |        |     |       |    |    |
|---------|------|-----------|----------|----|----|----|--------|-----|-------|----|----|
| GPO     | chr2 | 207819261 | A        | T  | -- | -- | Intron | SNP | 0.333 | 18 | 9  |
| --      | chr2 | 207939476 | T        | C  | -- | -- | IGR    | SNP | 0.259 | 20 | 7  |
| --      | chr2 | 208386468 | G        | C  | -- | -- | IGR    | SNP | 0.372 | 27 | 16 |
| PLEKHM3 | chr2 | 208800369 | G        | C  | -- | -- | Intron | SNP | 0.325 | 27 | 13 |
| --      | chr2 | 209237925 | G        | T  | -- | -- | IGR    | SNP | 0.360 | 16 | 9  |
| --      | chr2 | 209381713 | G        | A  | -- | -- | IGR    | SNP | 0.314 | 24 | 11 |
| --      | chr2 | 209472862 | G        | T  | -- | -- | IGR    | SNP | 0.333 | 8  | 4  |
| --      | chr2 | 209473355 | T        | C  | -- | -- | IGR    | SNP | 0.645 | 11 | 20 |
| --      | chr2 | 209763050 | G        | A  | -- | -- | IGR    | SNP | 0.250 | 6  | 2  |
| --      | chr2 | 209809671 | C        | G  | -- | -- | IGR    | SNP | 0.222 | 14 | 4  |
| --      | chr2 | 209818211 | C        | A  | -- | -- | IGR    | SNP | 0.486 | 18 | 17 |
| --      | chr2 | 209996749 | C        | T  | -- | -- | IGR    | SNP | 0.500 | 3  | 3  |
| --      | chr2 | 210145769 | C        | T  | -- | -- | IGR    | SNP | 0.333 | 12 | 6  |
| MAP2    | chr2 | 210291403 | C        | G  | -- | -- | Intron | SNP | 0.389 | 22 | 14 |
| C2orf67 | chr2 | 210919633 | C        | T  | -- | -- | Intron | SNP | 0.536 | 13 | 15 |
| C2orf67 | chr2 | 210929563 | C        | A  | -- | -- | Intron | SNP | 0.235 | 13 | 4  |
| ACADL   | chr2 | 211069775 | G        | A  | -- | -- | Intron | SNP | 0.524 | 20 | 22 |
| --      | chr2 | 211252126 | A        | G  | -- | -- | IGR    | SNP | 0.460 | 27 | 23 |
| CPS1    | chr2 | 211446647 | G        | T  | -- | -- | Intron | SNP | 0.143 | 24 | 4  |
| --      | chr2 | 212135178 | C        | G  | -- | -- | IGR    | SNP | 0.290 | 22 | 9  |
| --      | chr2 | 212143084 | G        | A  | -- | -- | IGR    | SNP | 0.161 | 26 | 5  |
| --      | chr2 | 212219858 | C        | G  | -- | -- | IGR    | SNP | 0.415 | 24 | 17 |
| ERBB4   | chr2 | 212296805 | G        | C  | -- | -- | Intron | SNP | 0.282 | 28 | 11 |
| ERBB4   | chr2 | 212754256 | CGGAACAA | -  | -- | -- | Intron | DEL | 0.103 | 26 | 3  |
| ERBB4   | chr2 | 213313667 | CTTT     | -  | -- | -- | Intron | DEL | 0.323 | 21 | 10 |
| --      | chr2 | 213729468 | C        | T  | -- | -- | IGR    | SNP | 0.108 | 33 | 4  |
| --      | chr2 | 214032236 | C        | T  | -- | -- | IGR    | SNP | 0.467 | 16 | 14 |
| SPAG16  | chr2 | 214941291 | T        | G  | -- | -- | Intron | SNP | 0.190 | 17 | 4  |
| SPAG16  | chr2 | 214952122 | G        | C  | -- | -- | Intron | SNP | 0.344 | 21 | 11 |
| WVC2L   | chr2 | 215366444 | T        | A  | -- | -- | Intron | SNP | 1.000 | 0  | 3  |
| --      | chr2 | 215442086 | G        | A  | -- | -- | IGR    | SNP | 0.439 | 23 | 18 |
| --      | chr2 | 215506946 | A        | C  | -- | -- | IGR    | SNP | 0.300 | 21 | 9  |
| ABCA12  | chr2 | 215868351 | G        | A  | -- | -- | Intron | SNP | 0.611 | 7  | 11 |
| --      | chr2 | 216019145 | G        | T  | -- | -- | IGR    | SNP | 0.333 | 8  | 4  |
| --      | chr2 | 216053791 | T        | A  | -- | -- | IGR    | SNP | 0.167 | 15 | 3  |
| --      | chr2 | 216382458 | G        | T  | -- | -- | IGR    | SNP | 0.424 | 19 | 14 |
| --      | chr2 | 216410236 | G        | A  | -- | -- | IGR    | SNP | 0.400 | 12 | 8  |
| --      | chr2 | 216429132 | C        | A  | -- | -- | IGR    | SNP | 0.481 | 14 | 13 |
| --      | chr2 | 216779882 | G        | T  | -- | -- | IGR    | SNP | 0.235 | 13 | 4  |
| --      | chr2 | 216779883 | A        | T  | -- | -- | IGR    | SNP | 0.263 | 14 | 5  |
| --      | chr2 | 216895683 | A        | T  | -- | -- | IGR    | SNP | 0.333 | 14 | 7  |
| PECR    | chr2 | 216917167 | G        | C  | -- | -- | Intron | SNP | 0.333 | 18 | 9  |
| PECR    | chr2 | 216917196 | G        | C  | -- | -- | Intron | SNP | 0.240 | 19 | 6  |
| PECR    | chr2 | 216917218 | G        | C  | -- | -- | Intron | SNP | 0.263 | 14 | 5  |
| PECR    | chr2 | 216917930 | G        | T  | -- | -- | Intron | SNP | 0.484 | 16 | 15 |
| PECR    | chr2 | 216917984 | G        | C  | -- | -- | Intron | SNP | 0.500 | 10 | 10 |
| XRCC5   | chr2 | 217059948 | G        | C  | -- | -- | Intron | SNP | 0.590 | 16 | 23 |
| 4-Mar   | chr2 | 217213719 | T        | A  | -- | -- | Intron | SNP | 0.171 | 34 | 7  |
| 4-Mar   | chr2 | 217213720 | C        | G  | -- | -- | Intron | SNP | 0.167 | 35 | 7  |
| --      | chr2 | 217496350 | C        | G  | -- | -- | IGR    | SNP | 0.136 | 19 | 3  |
| IGFBP2  | chr2 | 217510062 | G        | C  | -- | -- | Intron | SNP | 0.571 | 21 | 28 |
| --      | chr2 | 217702313 | G        | T  | -- | -- | IGR    | SNP | 0.340 | 31 | 16 |
| --      | chr2 | 217717814 | G        | C  | -- | -- | IGR    | SNP | 0.400 | 21 | 14 |
| --      | chr2 | 217730644 | C        | A  | -- | -- | IGR    | SNP | 0.125 | 28 | 4  |
| --      | chr2 | 217783744 | C        | A  | -- | -- | IGR    | SNP | 0.300 | 7  | 3  |
| --      | chr2 | 217850967 | A        | G  | -- | -- | IGR    | SNP | 0.537 | 19 | 22 |
| --      | chr2 | 217868260 | T        | A  | -- | -- | IGR    | SNP | 0.130 | 20 | 3  |
| --      | chr2 | 217888741 | G        | A  | -- | -- | IGR    | SNP | 0.541 | 17 | 20 |
| DIRC3   | chr2 | 218149786 | G        | C  | -- | -- | RNA    | SNP | 0.393 | 17 | 11 |
| DIRC3   | chr2 | 218243250 | -        | AC | -- | -- | RNA    | INS | 0.143 | 12 | 2  |
| DIRC3   | chr2 | 218336269 | C        | T  | -- | -- | RNA    | SNP | 0.100 | 27 | 3  |
| DIRC3   | chr2 | 218413695 | GCA      | -  | -- | -- | RNA    | DEL | 0.105 | 17 | 2  |
| DIRC3   | chr2 | 218467066 | -        | AG | -- | -- | RNA    | INS | 0.563 | 14 | 18 |
| DIRC3   | chr2 | 218568266 | T        | G  | -- | -- | RNA    | SNP | 0.500 | 17 | 17 |
| DIRC3   | chr2 | 218612850 | G        | T  | -- | -- | RNA    | SNP | 0.370 | 29 | 17 |
| TNS1    | chr2 | 218777089 | G        | A  | -- | -- | Intron | SNP | 0.577 | 11 | 15 |
| --      | chr2 | 218985637 | A        | C  | -- | -- | IGR    | SNP | 0.119 | 37 | 5  |
| C2orf62 | chr2 | 219224430 | G        | C  | -- | -- | Intron | SNP | 0.357 | 18 | 10 |
| USP37   | chr2 | 219412912 | C        | T  | -- | -- | Intron | SNP | 0.120 | 22 | 3  |
| --      | chr2 | 219713470 | C        | T  | -- | -- | IGR    | SNP | 0.469 | 17 | 15 |
| CCDC108 | chr2 | 219886402 | G        | A  | -- | -- | Intron | SNP | 0.417 | 28 | 20 |
| --      | chr2 | 219910005 | TG       | -  | -- | -- | IGR    | DEL | 0.214 | 11 | 3  |
| IHH     | chr2 | 219919753 | G        | A  | -- | -- | 3'UTR  | SNP | 0.300 | 28 | 12 |
| NHEJ1   | chr2 | 219960939 | A        | T  | -- | -- | Intron | SNP | 0.280 | 18 | 7  |
| ZFAND2B | chr2 | 220073438 | C        | A  | -- | -- | Intron | SNP | 0.111 | 40 | 5  |
| --      | chr2 | 220449888 | C        | A  | -- | -- | IGR    | SNP | 0.333 | 8  | 4  |
| --      | chr2 | 220791599 | G        | C  | -- | -- | IGR    | SNP | 0.138 | 25 | 4  |
| --      | chr2 | 221053433 | G        | A  | -- | -- | IGR    | SNP | 0.231 | 20 | 6  |
| --      | chr2 | 221366018 | G        | C  | -- | -- | IGR    | SNP | 0.394 | 20 | 13 |
| --      | chr2 | 221372766 | G        | A  | -- | -- | IGR    | SNP | 0.116 | 38 | 5  |

|                 |      |           |     |          |    |    |        |     |       |    |    |
|-----------------|------|-----------|-----|----------|----|----|--------|-----|-------|----|----|
| --              | chr2 | 221386090 | A   | T        | -- | -- | IGR    | SNP | 0.333 | 6  | 3  |
| --              | chr2 | 221544566 | G   | A        | -- | -- | IGR    | SNP | 0.190 | 17 | 4  |
| --              | chr2 | 221683669 | A   | G        | -- | -- | IGR    | SNP | 0.357 | 27 | 15 |
| --              | chr2 | 221727848 | G   | A        | -- | -- | IGR    | SNP | 0.100 | 27 | 3  |
| --              | chr2 | 221761969 | G   | A        | -- | -- | IGR    | SNP | 0.429 | 20 | 15 |
| --              | chr2 | 221972793 | T   | A        | -- | -- | IGR    | SNP | 0.150 | 34 | 6  |
| --              | chr2 | 221994614 | G   | A        | -- | -- | IGR    | SNP | 0.488 | 21 | 20 |
| --              | chr2 | 222524217 | G   | T        | -- | -- | IGR    | SNP | 0.267 | 22 | 8  |
| --              | chr2 | 222949930 | G   | T        | -- | -- | IGR    | SNP | 0.190 | 17 | 4  |
| --              | chr2 | 223242862 | G   | A        | -- | -- | IGR    | SNP | 0.429 | 20 | 15 |
| <i>SGPP2</i>    | chr2 | 223323853 | C   | T        | -- | -- | Intron | SNP | 0.286 | 10 | 4  |
| <i>ACSL3</i>    | chr2 | 223769790 | T   | C        | -- | -- | Intron | SNP | 0.268 | 30 | 11 |
| --              | chr2 | 223847262 | G   | A        | -- | -- | IGR    | SNP | 0.222 | 21 | 6  |
| --              | chr2 | 223929694 | T   | A        | -- | -- | IGR    | SNP | 0.121 | 29 | 4  |
| --              | chr2 | 224054041 | G   | A        | -- | -- | IGR    | SNP | 0.214 | 11 | 3  |
| --              | chr2 | 224117391 | AAG | -        | -- | -- | IGR    | DEL | 0.111 | 16 | 2  |
| --              | chr2 | 224311226 | A   | G        | -- | -- | IGR    | SNP | 0.476 | 11 | 10 |
| --              | chr2 | 224543655 | C   | T        | -- | -- | IGR    | SNP | 0.160 | 21 | 4  |
| --              | chr2 | 224543656 | T   | A        | -- | -- | IGR    | SNP | 0.160 | 21 | 4  |
| <i>AP1S3</i>    | chr2 | 224654838 | T   | A        | -- | -- | Intron | SNP | 0.108 | 33 | 4  |
| --              | chr2 | 225026332 | A   | T        | -- | -- | IGR    | SNP | 0.213 | 37 | 10 |
| --              | chr2 | 225285330 | T   | A        | -- | -- | IGR    | SNP | 0.514 | 17 | 18 |
| --              | chr2 | 225454566 | C   | A        | -- | -- | IGR    | SNP | 0.280 | 18 | 7  |
| --              | chr2 | 225518331 | C   | A        | -- | -- | IGR    | SNP | 0.366 | 26 | 15 |
| --              | chr2 | 225619212 | A   | T        | -- | -- | IGR    | SNP | 0.217 | 36 | 10 |
| --              | chr2 | 225911051 | A   | G        | -- | -- | IGR    | SNP | 0.385 | 16 | 10 |
| --              | chr2 | 226094466 | G   | A        | -- | -- | IGR    | SNP | 0.444 | 10 | 8  |
| --              | chr2 | 226213633 | G   | A        | -- | -- | IGR    | SNP | 0.286 | 20 | 8  |
| --              | chr2 | 226262975 | T   | A        | -- | -- | IGR    | SNP | 0.250 | 21 | 7  |
| --              | chr2 | 226262976 | C   | G        | -- | -- | IGR    | SNP | 0.250 | 21 | 7  |
| <i>KIAA1486</i> | chr2 | 226296884 | G   | T        | -- | -- | Intron | SNP | 0.286 | 10 | 4  |
| <i>KIAA1486</i> | chr2 | 226412380 | C   | T        | -- | -- | Intron | SNP | 0.208 | 42 | 11 |
| --              | chr2 | 226801103 | G   | T        | -- | -- | IGR    | SNP | 0.438 | 18 | 14 |
| --              | chr2 | 226821447 | G   | T        | -- | -- | IGR    | SNP | 0.313 | 22 | 10 |
| --              | chr2 | 226913957 | G   | T        | -- | -- | IGR    | SNP | 0.625 | 15 | 25 |
| --              | chr2 | 227079210 | A   | G        | -- | -- | IGR    | SNP | 0.286 | 15 | 6  |
| --              | chr2 | 227242529 | C   | T        | -- | -- | IGR    | SNP | 0.308 | 9  | 4  |
| --              | chr2 | 227278771 | C   | T        | -- | -- | IGR    | SNP | 0.333 | 16 | 8  |
| --              | chr2 | 227418529 | A   | C        | -- | -- | IGR    | SNP | 0.222 | 28 | 8  |
| --              | chr2 | 227571427 | C   | A        | -- | -- | IGR    | SNP | 0.370 | 17 | 10 |
| <i>COL4A4</i>   | chr2 | 227888179 | G   | A        | -- | -- | Intron | SNP | 0.261 | 17 | 6  |
| --              | chr2 | 228713754 | C   | T        | -- | -- | IGR    | SNP | 0.519 | 13 | 14 |
| --              | chr2 | 228830965 | A   | T        | -- | -- | IGR    | SNP | 0.222 | 21 | 6  |
| <i>SPHKAP</i>   | chr2 | 228986396 | A   | T        | -- | -- | Intron | SNP | 0.559 | 15 | 19 |
| <i>SPHKAP</i>   | chr2 | 229008012 | C   | T        | -- | -- | Intron | SNP | 0.258 | 23 | 8  |
| --              | chr2 | 229352759 | A   | C        | -- | -- | IGR    | SNP | 0.174 | 19 | 4  |
| --              | chr2 | 229569303 | G   | A        | -- | -- | IGR    | SNP | 0.185 | 22 | 5  |
| --              | chr2 | 229618247 | C   | G        | -- | -- | IGR    | SNP | 0.583 | 15 | 21 |
| --              | chr2 | 229714324 | C   | A        | -- | -- | IGR    | SNP | 0.462 | 14 | 12 |
| <i>TRIP12</i>   | chr2 | 230746034 | C   | T        | -- | -- | Intron | SNP | 0.462 | 14 | 12 |
| --              | chr2 | 231187704 | C   | T        | -- | -- | IGR    | SNP | 0.327 | 35 | 17 |
| <i>SP140L</i>   | chr2 | 231206519 | -   | GGGGATCA | -- | -- | Intron | INS | 0.125 | 14 | 2  |
| --              | chr2 | 231464960 | G   | A        | -- | -- | IGR    | SNP | 0.208 | 19 | 5  |
| --              | chr2 | 231480411 | T   | A        | -- | -- | IGR    | SNP | 0.150 | 17 | 3  |
| <i>C2orf72</i>  | chr2 | 231913242 | A   | C        | -- | -- | 3'UTR  | SNP | 0.156 | 27 | 5  |
| --              | chr2 | 232476457 | G   | A        | -- | -- | IGR    | SNP | 0.300 | 28 | 12 |
| --              | chr2 | 232480757 | C   | A        | -- | -- | IGR    | SNP | 0.400 | 9  | 6  |
| --              | chr2 | 232692478 | A   | C        | -- | -- | IGR    | SNP | 0.200 | 24 | 6  |
| --              | chr2 | 232701150 | T   | C        | -- | -- | IGR    | SNP | 0.115 | 23 | 3  |
| <i>DIS3L2</i>   | chr2 | 232994147 | T   | G        | -- | -- | Intron | SNP | 0.394 | 20 | 13 |
| <i>DIS3L2</i>   | chr2 | 233171967 | T   | G        | -- | -- | Intron | SNP | 0.373 | 37 | 22 |
| --              | chr2 | 233226325 | C   | T        | -- | -- | IGR    | SNP | 0.118 | 30 | 4  |
| --              | chr2 | 233380639 | G   | T        | -- | -- | IGR    | SNP | 0.298 | 33 | 14 |
| <i>EIF4E2</i>   | chr2 | 233429672 | C   | T        | -- | -- | Intron | SNP | 0.239 | 35 | 11 |
| <i>GIGYF2</i>   | chr2 | 233699593 | A   | T        | -- | -- | Intron | SNP | 0.231 | 20 | 6  |
| --              | chr2 | 233902591 | G   | A        | -- | -- | IGR    | SNP | 0.238 | 16 | 5  |
| --              | chr2 | 234490679 | T   | C        | -- | -- | IGR    | SNP | 0.300 | 7  | 3  |
| --              | chr2 | 234490680 | G   | T        | -- | -- | IGR    | SNP | 0.300 | 7  | 3  |
| <i>UGT1A8</i>   | chr2 | 234527316 | T   | G        | -- | -- | Intron | SNP | 0.200 | 20 | 5  |
| <i>TRPM8</i>    | chr2 | 234887453 | T   | C        | -- | -- | Intron | SNP | 0.500 | 19 | 19 |
| --              | chr2 | 235113376 | GT  | -        | -- | -- | IGR    | DEL | 0.333 | 16 | 8  |
| --              | chr2 | 235361049 | A   | T        | -- | -- | IGR    | SNP | 0.115 | 23 | 3  |
| --              | chr2 | 235449159 | G   | C        | -- | -- | IGR    | SNP | 0.378 | 23 | 14 |
| --              | chr2 | 235538440 | C   | T        | -- | -- | IGR    | SNP | 0.400 | 18 | 12 |
| --              | chr2 | 235554267 | -   | CT       | -- | -- | IGR    | INS | 0.125 | 21 | 3  |
| --              | chr2 | 235554295 | -   | GC       | -- | -- | IGR    | INS | 0.111 | 16 | 2  |
| --              | chr2 | 236020109 | A   | C        | -- | -- | IGR    | SNP | 0.167 | 25 | 5  |
| --              | chr2 | 236186263 | G   | A        | -- | -- | IGR    | SNP | 0.133 | 26 | 4  |
| --              | chr2 | 236241843 | C   | G        | -- | -- | IGR    | SNP | 0.286 | 30 | 12 |
| <i>AGAP1</i>    | chr2 | 236583355 | G   | T        | -- | -- | Intron | SNP | 0.211 | 15 | 4  |

|           |      |           |     |        |    |    |         |     |       |     |     |
|-----------|------|-----------|-----|--------|----|----|---------|-----|-------|-----|-----|
| AGAP1     | chr2 | 236643184 | G   | A      | -- | -- | Intron  | SNP | 0.114 | 31  | 4   |
| AGAP1     | chr2 | 236764582 | G   | T      | -- | -- | Intron  | SNP | 0.455 | 18  | 15  |
| IQCA1     | chr2 | 237253512 | A   | G      | -- | -- | Intron  | SNP | 0.135 | 45  | 7   |
| --        | chr2 | 237838965 | C   | T      | -- | -- | IGR     | SNP | 0.486 | 19  | 18  |
| --        | chr2 | 237939390 | G   | A      | -- | -- | IGR     | SNP | 0.208 | 19  | 5   |
| --        | chr2 | 238366672 | G   | T      | -- | -- | IGR     | SNP | 0.302 | 30  | 13  |
| LRRFIP1   | chr2 | 238542185 | C   | T      | -- | -- | Intron  | SNP | 0.282 | 28  | 11  |
| LRRFIP1   | chr2 | 238602552 | G   | T      | -- | -- | Intron  | SNP | 0.111 | 24  | 3   |
| --        | chr2 | 238870800 | C   | T      | -- | -- | IGR     | SNP | 0.415 | 31  | 22  |
| ESPNL     | chr2 | 239016049 | C   | T      | -- | -- | Intron  | SNP | 0.297 | 26  | 11  |
| KLHL30    | chr2 | 239053294 | C   | A      | -- | -- | Intron  | SNP | 0.351 | 24  | 13  |
| --        | chr2 | 239073278 | G   | A      | -- | -- | IGR     | SNP | 0.304 | 16  | 7   |
| --        | chr2 | 239216357 | C   | T      | -- | -- | IGR     | SNP | 0.368 | 24  | 14  |
| --        | chr2 | 239685439 | G   | A      | -- | -- | IGR     | SNP | 0.182 | 18  | 4   |
| --        | chr2 | 239704139 | G   | A      | -- | -- | IGR     | SNP | 0.514 | 17  | 18  |
| --        | chr2 | 239957239 | T   | G      | -- | -- | IGR     | SNP | 0.227 | 17  | 5   |
| HDAC4     | chr2 | 239995752 | T   | G      | -- | -- | Intron  | SNP | 0.176 | 28  | 6   |
| HDAC4     | chr2 | 240007928 | C   | T      | -- | -- | Intron  | SNP | 0.130 | 40  | 6   |
| HDAC4     | chr2 | 240099081 | A   | C      | -- | -- | Intron  | SNP | 0.462 | 21  | 18  |
| --        | chr2 | 240433322 | T   | A      | -- | -- | IGR     | SNP | 0.500 | 6   | 6   |
| --        | chr2 | 240748673 | C   | A      | -- | -- | IGR     | SNP | 0.205 | 35  | 9   |
| --        | chr2 | 240848407 | C   | A      | -- | -- | IGR     | SNP | 0.171 | 29  | 6   |
| MYEOV2    | chr2 | 241066780 | GTC | -      | -- | -- | Intron  | DEL | 0.128 | 34  | 5   |
| --        | chr2 | 241186081 | G   | T      | -- | -- | IGR     | SNP | 0.286 | 35  | 14  |
| CAPN10    | chr2 | 241525823 | G   | C      | -- | -- | 5'Flank | SNP | 0.400 | 24  | 16  |
| KIF1A     | chr2 | 241720135 | C   | T      | -- | -- | Intron  | SNP | 0.289 | 27  | 11  |
| --        | chr2 | 241854080 | C   | T      | -- | -- | IGR     | SNP | 0.146 | 35  | 6   |
| --        | chr2 | 241919011 | G   | T      | -- | -- | IGR     | SNP | 0.600 | 2   | 3   |
| --        | chr2 | 241919392 | G   | A      | -- | -- | IGR     | SNP | 0.273 | 8   | 3   |
| PASK      | chr2 | 242071804 | G   | A      | -- | -- | Intron  | SNP | 0.308 | 9   | 4   |
| HDLBP     | chr2 | 242227662 | A   | T      | -- | -- | Intron  | SNP | 0.283 | 33  | 13  |
| FARP2     | chr2 | 242300458 | C   | A      | -- | -- | Intron  | SNP | 0.125 | 28  | 4   |
| --        | chr2 | 242761513 | G   | A      | -- | -- | IGR     | SNP | 0.204 | 39  | 10  |
| --        | chr2 | 242761609 | G   | A      | -- | -- | IGR     | SNP | 0.296 | 19  | 8   |
| --        | chr2 | 242946301 | -   | CGTAA  | -- | -- | IGR     | INS | 0.118 | 30  | 4   |
| --        | chr2 | 242949959 | C   | T      | -- | -- | IGR     | SNP | 0.211 | 15  | 4   |
| LOC728323 | chr2 | 243038450 | A   | G      | -- | -- | RNA     | SNP | 0.116 | 38  | 5   |
| --        | chr2 | 243155339 | G   | C      | -- | -- | IGR     | SNP | 0.132 | 33  | 5   |
| --        | chr2 | 243181966 | A   | G      | -- | -- | IGR     | SNP | 0.125 | 21  | 3   |
| --        | chr3 | 132931    | C   | T      | -- | -- | IGR     | SNP | 0.128 | 129 | 19  |
| CHL1      | chr3 | 298461    | G   | A      | -- | -- | Intron  | SNP | 0.750 | 34  | 102 |
| --        | chr3 | 514996    | G   | A      | -- | -- | IGR     | SNP | 0.731 | 7   | 19  |
| --        | chr3 | 563646    | C   | G      | -- | -- | IGR     | SNP | 0.462 | 14  | 12  |
| --        | chr3 | 590904    | C   | T      | -- | -- | IGR     | SNP | 0.263 | 14  | 5   |
| --        | chr3 | 644221    | A   | G      | -- | -- | IGR     | SNP | 0.125 | 35  | 5   |
| --        | chr3 | 747489    | G   | T      | -- | -- | IGR     | SNP | 0.421 | 22  | 16  |
| --        | chr3 | 815517    | A   | T      | -- | -- | IGR     | SNP | 0.409 | 13  | 9   |
| CNTN6     | chr3 | 1160556   | C   | A      | -- | -- | Intron  | SNP | 0.156 | 27  | 5   |
| --        | chr3 | 1830368   | C   | A      | -- | -- | IGR     | SNP | 0.381 | 13  | 8   |
| --        | chr3 | 1884672   | C   | T      | -- | -- | IGR     | SNP | 0.912 | 3   | 31  |
| CNTN4     | chr3 | 2207077   | T   | C      | -- | -- | Intron  | SNP | 0.444 | 10  | 8   |
| CNTN4     | chr3 | 2244531   | G   | C      | -- | -- | Intron  | SNP | 0.318 | 15  | 7   |
| CNTN4     | chr3 | 2298698   | C   | T      | -- | -- | Intron  | SNP | 0.516 | 15  | 16  |
| CNTN4     | chr3 | 2711612   | T   | A      | -- | -- | Intron  | SNP | 1.000 | 0   | 3   |
| CNTN4     | chr3 | 2832361   | G   | T      | -- | -- | Intron  | SNP | 0.732 | 11  | 30  |
| CNTN4     | chr3 | 2983725   | G   | T      | -- | -- | Intron  | SNP | 0.407 | 16  | 11  |
| LRRN1     | chr3 | 3872742   | G   | A      | -- | -- | Intron  | SNP | 0.320 | 17  | 8   |
| --        | chr3 | 4064155   | A   | G      | -- | -- | IGR     | SNP | 0.125 | 28  | 4   |
| --        | chr3 | 4125083   | C   | A      | -- | -- | IGR     | SNP | 0.125 | 28  | 4   |
| --        | chr3 | 4148122   | T   | A      | -- | -- | IGR     | SNP | 0.188 | 26  | 6   |
| --        | chr3 | 4263095   | -   | TGG    | -- | -- | IGR     | INS | 0.216 | 29  | 8   |
| --        | chr3 | 4298385   | G   | C      | -- | -- | IGR     | SNP | 0.308 | 9   | 4   |
| --        | chr3 | 4934034   | G   | C      | -- | -- | IGR     | SNP | 0.926 | 2   | 25  |
| BHLHE40   | chr3 | 5026713   | G   | T      | -- | -- | 3'UTR   | SNP | 0.444 | 10  | 8   |
| MIR4790   | chr3 | 5291669   | C   | A      | -- | -- | 3'Flank | SNP | 0.250 | 12  | 4   |
| --        | chr3 | 5944812   | A   | T      | -- | -- | IGR     | SNP | 0.308 | 18  | 8   |
| --        | chr3 | 5976817   | G   | C      | -- | -- | IGR     | SNP | 0.429 | 16  | 12  |
| --        | chr3 | 6073930   | C   | G      | -- | -- | IGR     | SNP | 0.316 | 13  | 6   |
| --        | chr3 | 6309016   | -   | TC     | -- | -- | IGR     | INS | 0.133 | 13  | 2   |
| --        | chr3 | 6347411   | A   | G      | -- | -- | IGR     | SNP | 0.133 | 130 | 20  |
| --        | chr3 | 6540177   | -   | TTAAAC | -- | -- | IGR     | INS | 0.500 | 11  | 12  |
| --        | chr3 | 6540182   | G   | C      | -- | -- | IGR     | SNP | 0.542 | 11  | 13  |
| --        | chr3 | 6702798   | A   | T      | -- | -- | IGR     | SNP | 0.146 | 123 | 21  |
| --        | chr3 | 6718208   | C   | A      | -- | -- | IGR     | SNP | 0.130 | 114 | 17  |
| --        | chr3 | 6756057   | T   | A      | -- | -- | IGR     | SNP | 0.133 | 52  | 8   |
| --        | chr3 | 6894871   | A   | T      | -- | -- | IGR     | SNP | 0.123 | 121 | 17  |
| --        | chr3 | 6894872   | T   | C      | -- | -- | IGR     | SNP | 0.124 | 120 | 17  |
| GRM7      | chr3 | 6907284   | C   | A      | -- | -- | Intron  | SNP | 0.176 | 103 | 22  |
| GRM7      | chr3 | 6993528   | C   | A      | -- | -- | Intron  | SNP | 0.780 | 29  | 103 |
| GRM7      | chr3 | 7013593   | CT  | -      | -- | -- | Intron  | DEL | 0.110 | 73  | 9   |



|            |      |          |     |        |    |    |        |     |       |     |     |
|------------|------|----------|-----|--------|----|----|--------|-----|-------|-----|-----|
| GRM7       | chr3 | 7097534  | T   | G      | -- | -- | Intron | SNP | 0.111 | 120 | 15  |
| GRM7       | chr3 | 7303216  | A   | T      | -- | -- | Intron | SNP | 0.140 | 117 | 19  |
| GRM7       | chr3 | 7318970  | C   | G      | -- | -- | Intron | SNP | 0.111 | 88  | 11  |
| GRM7       | chr3 | 7596911  | T   | C      | -- | -- | Intron | SNP | 0.764 | 30  | 97  |
| --         | chr3 | 7791583  | G   | A      | -- | -- | IGR    | SNP | 0.118 | 30  | 4   |
| --         | chr3 | 7836011  | G   | A      | -- | -- | IGR    | SNP | 0.118 | 75  | 10  |
| LOC1002884 | chr3 | 8296466  | T   | A      | -- | -- | RNA    | SNP | 0.433 | 148 | 113 |
| LOC1002884 | chr3 | 8360182  | C   | G      | -- | -- | RNA    | SNP | 0.864 | 21  | 133 |
| LOC1002884 | chr3 | 8453559  | C   | A      | -- | -- | RNA    | SNP | 0.137 | 113 | 18  |
| LOC1002884 | chr3 | 8453650  | G   | A      | -- | -- | RNA    | SNP | 0.134 | 58  | 9   |
| LOC1002884 | chr3 | 8454293  | C   | T      | -- | -- | RNA    | SNP | 0.268 | 93  | 34  |
| LOC1002884 | chr3 | 8482196  | T   | C      | -- | -- | RNA    | SNP | 0.140 | 37  | 6   |
| --         | chr3 | 8758716  | C   | T      | -- | -- | IGR    | SNP | 0.320 | 34  | 16  |
| OXTR       | chr3 | 8809956  | T   | G      | -- | -- | 5'UTR  | SNP | 0.306 | 25  | 11  |
| SRGAP3     | chr3 | 9082907  | C   | T      | -- | -- | Intron | SNP | 0.117 | 113 | 15  |
| --         | chr3 | 9305187  | G   | C      | -- | -- | IGR    | SNP | 0.246 | 52  | 17  |
| --         | chr3 | 9305261  | AG  | -      | -- | -- | IGR    | DEL | 0.176 | 42  | 9   |
| --         | chr3 | 9305314  | G   | C      | -- | -- | IGR    | SNP | 0.123 | 50  | 7   |
| --         | chr3 | 9305606  | G   | C      | -- | -- | IGR    | SNP | 0.230 | 57  | 17  |
| --         | chr3 | 9306420  | G   | T      | -- | -- | IGR    | SNP | 0.162 | 62  | 12  |
| --         | chr3 | 9306454  | G   | A      | -- | -- | IGR    | SNP | 0.180 | 50  | 11  |
| --         | chr3 | 9307400  | G   | T      | -- | -- | IGR    | SNP | 0.250 | 18  | 6   |
| --         | chr3 | 9400399  | T   | A      | -- | -- | IGR    | SNP | 0.106 | 93  | 11  |
| SETD5      | chr3 | 9510534  | G   | T      | -- | -- | Intron | SNP | 0.767 | 34  | 112 |
| LHFPL4     | chr3 | 9585434  | A   | T      | -- | -- | Intron | SNP | 0.121 | 29  | 4   |
| CIDEA      | chr3 | 9912425  | G   | T      | -- | -- | Intron | SNP | 0.110 | 145 | 18  |
| IL17RC     | chr3 | 9964892  | G   | C      | -- | -- | Intron | SNP | 0.800 | 15  | 60  |
| IL17RC     | chr3 | 9965359  | G   | C      | -- | -- | Intron | SNP | 0.793 | 31  | 119 |
| IL17RC     | chr3 | 9965790  | G   | A      | -- | -- | Intron | SNP | 0.777 | 44  | 153 |
| --         | chr3 | 10181347 | C   | T      | -- | -- | IGR    | SNP | 0.217 | 18  | 5   |
| --         | chr3 | 11015740 | G   | A      | -- | -- | IGR    | SNP | 0.139 | 31  | 5   |
| --         | chr3 | 11093223 | C   | T      | -- | -- | IGR    | SNP | 0.222 | 14  | 4   |
| VGLL4      | chr3 | 11666398 | G   | C      | -- | -- | Intron | SNP | 0.226 | 96  | 28  |
| --         | chr3 | 11954701 | G   | A      | -- | -- | IGR    | SNP | 0.192 | 105 | 25  |
| --         | chr3 | 11984171 | GTA | -      | -- | -- | IGR    | DEL | 0.345 | 19  | 10  |
| --         | chr3 | 11985022 | -   | CTA    | -- | -- | IGR    | INS | 0.175 | 33  | 7   |
| SYN2       | chr3 | 12116261 | C   | A      | -- | -- | Intron | SNP | 0.158 | 85  | 16  |
| --         | chr3 | 12279892 | G   | C      | -- | -- | IGR    | SNP | 0.281 | 82  | 32  |
| --         | chr3 | 12285204 | G   | C      | -- | -- | IGR    | SNP | 0.237 | 90  | 28  |
| --         | chr3 | 12285243 | G   | C      | -- | -- | IGR    | SNP | 0.213 | 100 | 27  |
| --         | chr3 | 12285553 | G   | C      | -- | -- | IGR    | SNP | 0.177 | 121 | 26  |
| --         | chr3 | 12286634 | G   | A      | -- | -- | IGR    | SNP | 0.200 | 96  | 24  |
| --         | chr3 | 12288280 | G   | A      | -- | -- | IGR    | SNP | 0.173 | 110 | 23  |
| PPARG      | chr3 | 12413386 | C   | G      | -- | -- | Intron | SNP | 0.113 | 125 | 16  |
| IQSEC1     | chr3 | 13002906 | C   | A      | -- | -- | Intron | SNP | 0.142 | 133 | 22  |
| IQSEC1     | chr3 | 13013700 | A   | C      | -- | -- | Intron | SNP | 0.145 | 106 | 18  |
| --         | chr3 | 13481343 | C   | T      | -- | -- | IGR    | SNP | 0.143 | 24  | 4   |
| FBLN2      | chr3 | 13594836 | T   | A      | -- | -- | Intron | SNP | 0.889 | 5   | 40  |
| FBLN2      | chr3 | 13657013 | T   | C      | -- | -- | Intron | SNP | 0.472 | 19  | 17  |
| LOC285375  | chr3 | 13746018 | G   | C      | -- | -- | RNA    | SNP | 1.000 | 0   | 15  |
| --         | chr3 | 13789563 | T   | C      | -- | -- | IGR    | SNP | 0.264 | 39  | 14  |
| TPRXL      | chr3 | 14018840 | A   | T      | -- | -- | RNA    | SNP | 0.333 | 24  | 12  |
| SLC6A6     | chr3 | 14464282 | T   | C      | -- | -- | Intron | SNP | 0.142 | 133 | 22  |
| GRIP2      | chr3 | 14573634 | C   | T      | -- | -- | Intron | SNP | 0.726 | 52  | 138 |
| FGD5       | chr3 | 14902573 | G   | A      | -- | -- | Intron | SNP | 0.818 | 8   | 36  |
| --         | chr3 | 15168089 | A   | G      | -- | -- | IGR    | SNP | 0.143 | 42  | 7   |
| --         | chr3 | 15168094 | C   | T      | -- | -- | IGR    | SNP | 0.133 | 39  | 6   |
| --         | chr3 | 15168096 | A   | G      | -- | -- | IGR    | SNP | 0.133 | 39  | 6   |
| --         | chr3 | 15168314 | C   | T      | -- | -- | IGR    | SNP | 0.191 | 38  | 9   |
| --         | chr3 | 15168741 | C   | T      | -- | -- | IGR    | SNP | 0.250 | 18  | 6   |
| COL6A4P1   | chr3 | 15231861 | C   | T      | -- | -- | RNA    | SNP | 0.286 | 5   | 2   |
| ANKRD28    | chr3 | 15769098 | G   | A      | -- | -- | Intron | SNP | 0.286 | 10  | 4   |
| ANKRD28    | chr3 | 15819407 | A   | C      | -- | -- | Intron | SNP | 0.176 | 14  | 3   |
| --         | chr3 | 15986512 | AAG | -      | -- | -- | IGR    | DEL | 0.188 | 13  | 3   |
| --         | chr3 | 15991198 | C   | G      | -- | -- | IGR    | SNP | 0.818 | 6   | 27  |
| RFTN1      | chr3 | 16447374 | C   | A      | -- | -- | Intron | SNP | 0.458 | 13  | 11  |
| --         | chr3 | 16707208 | C   | T      | -- | -- | IGR    | SNP | 0.176 | 14  | 3   |
| TBC1D5     | chr3 | 17703646 | A   | C      | -- | -- | Intron | SNP | 0.974 | 1   | 37  |
| TBC1D5     | chr3 | 17716883 | G   | A      | -- | -- | Intron | SNP | 0.829 | 7   | 34  |
| --         | chr3 | 18031390 | T   | A      | -- | -- | IGR    | SNP | 0.115 | 46  | 6   |
| --         | chr3 | 18052178 | G   | T      | -- | -- | IGR    | SNP | 0.208 | 19  | 5   |
| --         | chr3 | 18090121 | A   | G      | -- | -- | IGR    | SNP | 0.417 | 14  | 10  |
| --         | chr3 | 18237549 | G   | C      | -- | -- | IGR    | SNP | 0.903 | 3   | 28  |
| --         | chr3 | 18693686 | G   | A      | -- | -- | IGR    | SNP | 0.545 | 10  | 12  |
| --         | chr3 | 18950112 | A   | G      | -- | -- | IGR    | SNP | 0.129 | 27  | 4   |
| --         | chr3 | 19170246 | A   | T      | -- | -- | IGR    | SNP | 0.885 | 3   | 23  |
| KCNH8      | chr3 | 19282120 | AC  | -      | -- | -- | Intron | DEL | 0.111 | 16  | 2   |
| KCNH8      | chr3 | 19415971 | A   | C      | -- | -- | Intron | SNP | 0.333 | 10  | 5   |
| KCNH8      | chr3 | 19415987 | -   | ATGTGT | -- | -- | Intron | INS | 0.263 | 14  | 5   |
| KCNH8      | chr3 | 19416155 | C   | A      | -- | -- | Intron | SNP | 0.400 | 6   | 4   |

|           |      |          |     |       |    |    |        |     |       |    |    |
|-----------|------|----------|-----|-------|----|----|--------|-----|-------|----|----|
| KCNH8     | chr3 | 19416193 | G   | A     | -- | -- | Intron | SNP | 0.333 | 8  | 4  |
| KCNH8     | chr3 | 19495688 | G   | T     | -- | -- | Intron | SNP | 0.417 | 7  | 5  |
| --        | chr3 | 19721366 | A   | G     | -- | -- | IGR    | SNP | 0.444 | 10 | 8  |
| --        | chr3 | 19748497 | C   | A     | -- | -- | IGR    | SNP | 0.160 | 21 | 4  |
| --        | chr3 | 19748498 | T   | A     | -- | -- | IGR    | SNP | 0.160 | 21 | 4  |
| --        | chr3 | 19826110 | G   | A     | -- | -- | IGR    | SNP | 0.759 | 7  | 22 |
| KAT2B     | chr3 | 20104929 | -   | CT    | -- | -- | Intron | INS | 0.118 | 15 | 2  |
| --        | chr3 | 20410791 | G   | A     | -- | -- | IGR    | SNP | 0.214 | 11 | 3  |
| --        | chr3 | 20488266 | G   | A     | -- | -- | IGR    | SNP | 0.486 | 19 | 18 |
| --        | chr3 | 21066722 | G   | C     | -- | -- | IGR    | SNP | 0.111 | 32 | 4  |
| ZNF385D   | chr3 | 21565277 | TG  | -     | -- | -- | Intron | DEL | 0.118 | 15 | 2  |
| --        | chr3 | 21806710 | TGA | -     | -- | -- | IGR    | DEL | 0.108 | 33 | 4  |
| --        | chr3 | 21892997 | C   | A     | -- | -- | IGR    | SNP | 0.200 | 16 | 4  |
| --        | chr3 | 22084128 | T   | A     | -- | -- | IGR    | SNP | 0.139 | 31 | 5  |
| --        | chr3 | 22235485 | C   | A     | -- | -- | IGR    | SNP | 0.870 | 3  | 20 |
| --        | chr3 | 22287243 | T   | G     | -- | -- | IGR    | SNP | 0.190 | 17 | 4  |
| --        | chr3 | 22515619 | T   | G     | -- | -- | IGR    | SNP | 0.450 | 11 | 9  |
| --        | chr3 | 22554061 | AAT | -     | -- | -- | IGR    | DEL | 0.107 | 25 | 3  |
| --        | chr3 | 22695911 | A   | T     | -- | -- | IGR    | SNP | 0.148 | 23 | 4  |
| --        | chr3 | 22699718 | G   | T     | -- | -- | IGR    | SNP | 0.409 | 13 | 9  |
| --        | chr3 | 22784536 | TC  | -     | -- | -- | IGR    | DEL | 0.286 | 15 | 6  |
| --        | chr3 | 22784577 | C   | T     | -- | -- | IGR    | SNP | 0.500 | 6  | 6  |
| --        | chr3 | 22853552 | C   | G     | -- | -- | IGR    | SNP | 0.594 | 13 | 19 |
| --        | chr3 | 23067725 | GTA | -     | -- | -- | IGR    | DEL | 0.143 | 12 | 2  |
| --        | chr3 | 23141667 | A   | G     | -- | -- | IGR    | SNP | 0.947 | 1  | 18 |
| --        | chr3 | 23164612 | -   | TAC   | -- | -- | IGR    | INS | 0.172 | 24 | 5  |
| UBE2E2    | chr3 | 23244952 | T   | C     | -- | -- | 5'UTR  | SNP | 0.231 | 10 | 3  |
| UBE2E2    | chr3 | 23363732 | G   | C     | -- | -- | Intron | SNP | 0.920 | 2  | 23 |
| MIR548AC  | chr3 | 23418600 | A   | G     | -- | -- | RNA    | SNP | 0.414 | 17 | 12 |
| LOC152024 | chr3 | 24141658 | G   | T     | -- | -- | RNA    | SNP | 0.250 | 12 | 4  |
| --        | chr3 | 24580323 | G   | A     | -- | -- | IGR    | SNP | 0.321 | 19 | 9  |
| --        | chr3 | 24827188 | A   | T     | -- | -- | IGR    | SNP | 0.529 | 8  | 9  |
| --        | chr3 | 25243849 | C   | A     | -- | -- | IGR    | SNP | 0.214 | 11 | 3  |
| --        | chr3 | 25243889 | T   | A     | -- | -- | IGR    | SNP | 0.188 | 13 | 3  |
| --        | chr3 | 25243892 | G   | A     | -- | -- | IGR    | SNP | 0.188 | 13 | 3  |
| --        | chr3 | 25371362 | C   | G     | -- | -- | IGR    | SNP | 0.333 | 10 | 5  |
| --        | chr3 | 25375602 | A   | T     | -- | -- | IGR    | SNP | 0.222 | 14 | 4  |
| --        | chr3 | 25714509 | G   | A     | -- | -- | IGR    | SNP | 0.200 | 36 | 9  |
| --        | chr3 | 26039145 | -   | TTTCA | -- | -- | IGR    | INS | 0.118 | 15 | 2  |
| --        | chr3 | 26146398 | A   | T     | -- | -- | IGR    | SNP | 0.200 | 20 | 5  |
| --        | chr3 | 26546250 | T   | C     | -- | -- | IGR    | SNP | 0.385 | 16 | 10 |
| NEK10     | chr3 | 27338652 | G   | C     | -- | -- | Intron | SNP | 0.838 | 6  | 31 |
| --        | chr3 | 27518675 | T   | C     | -- | -- | IGR    | SNP | 0.903 | 3  | 28 |
| --        | chr3 | 27785667 | G   | T     | -- | -- | IGR    | SNP | 0.176 | 14 | 3  |
| LOC645206 | chr3 | 28671378 | C   | A     | -- | -- | RNA    | SNP | 0.833 | 4  | 20 |
| --        | chr3 | 28961704 | T   | G     | -- | -- | IGR    | SNP | 0.387 | 19 | 12 |
| --        | chr3 | 28991446 | T   | C     | -- | -- | IGR    | SNP | 0.909 | 3  | 30 |
| --        | chr3 | 29032189 | G   | T     | -- | -- | IGR    | SNP | 0.250 | 12 | 4  |
| RBMS3     | chr3 | 29485310 | G   | A     | -- | -- | Intron | SNP | 0.875 | 4  | 28 |
| --        | chr3 | 30126188 | G   | T     | -- | -- | IGR    | SNP | 0.300 | 7  | 3  |
| --        | chr3 | 30568316 | A   | T     | -- | -- | IGR    | SNP | 0.389 | 11 | 7  |
| GADL1     | chr3 | 30807887 | G   | C     | -- | -- | Intron | SNP | 0.514 | 18 | 19 |
| GADL1     | chr3 | 30825142 | AAG | -     | -- | -- | Intron | DEL | 0.414 | 17 | 12 |
| --        | chr3 | 31028856 | G   | A     | -- | -- | IGR    | SNP | 0.242 | 25 | 8  |
| --        | chr3 | 31242579 | CAG | -     | -- | -- | IGR    | DEL | 0.133 | 38 | 6  |
| --        | chr3 | 32053738 | G   | A     | -- | -- | IGR    | SNP | 0.214 | 11 | 3  |
| --        | chr3 | 32238958 | C   | A     | -- | -- | IGR    | SNP | 0.190 | 17 | 4  |
| CMTM6     | chr3 | 32524229 | G   | T     | -- | -- | 3'UTR  | SNP | 0.250 | 12 | 4  |
| CNOT10    | chr3 | 32776654 | A   | T     | -- | -- | Intron | SNP | 0.304 | 16 | 7  |
| --        | chr3 | 33282920 | T   | A     | -- | -- | IGR    | SNP | 0.393 | 17 | 11 |
| FBXL2     | chr3 | 33402611 | G   | T     | -- | -- | Intron | SNP | 0.364 | 7  | 4  |
| --        | chr3 | 34131036 | G   | T     | -- | -- | IGR    | SNP | 0.286 | 10 | 4  |
| --        | chr3 | 34327150 | C   | T     | -- | -- | IGR    | SNP | 0.756 | 10 | 31 |
| --        | chr3 | 34515629 | T   | A     | -- | -- | IGR    | SNP | 0.457 | 19 | 16 |
| --        | chr3 | 34683133 | A   | G     | -- | -- | IGR    | SNP | 0.222 | 14 | 4  |
| --        | chr3 | 34683170 | T   | C     | -- | -- | IGR    | SNP | 0.182 | 18 | 4  |
| --        | chr3 | 35149865 | -   | AAT   | -- | -- | IGR    | INS | 0.105 | 17 | 2  |
| --        | chr3 | 35179122 | A   | T     | -- | -- | IGR    | SNP | 0.481 | 14 | 13 |
| --        | chr3 | 35359689 | G   | C     | -- | -- | IGR    | SNP | 0.304 | 16 | 7  |
| --        | chr3 | 35949267 | G   | T     | -- | -- | IGR    | SNP | 0.111 | 24 | 3  |
| --        | chr3 | 35952206 | G   | C     | -- | -- | IGR    | SNP | 0.727 | 6  | 16 |
| --        | chr3 | 36179285 | A   | G     | -- | -- | IGR    | SNP | 0.214 | 11 | 3  |
| --        | chr3 | 36235070 | G   | A     | -- | -- | IGR    | SNP | 0.821 | 7  | 32 |
| --        | chr3 | 36370593 | G   | A     | -- | -- | IGR    | SNP | 0.158 | 16 | 3  |
| STAC      | chr3 | 36571410 | G   | A     | -- | -- | Intron | SNP | 0.765 | 4  | 13 |
| LRRFIP2   | chr3 | 37139888 | TC  | -     | -- | -- | Intron | DEL | 0.125 | 14 | 2  |
| --        | chr3 | 37231756 | G   | T     | -- | -- | IGR    | SNP | 0.308 | 9  | 4  |
| SCN5A     | chr3 | 38673185 | A   | T     | -- | -- | Intron | SNP | 0.342 | 25 | 13 |
| --        | chr3 | 38733831 | T   | G     | -- | -- | IGR    | SNP | 0.154 | 22 | 4  |
| --        | chr3 | 38733840 | G   | A     | -- | -- | IGR    | SNP | 0.143 | 24 | 4  |

|          |      |          |       |    |        |        |                 |     |       |    |    |
|----------|------|----------|-------|----|--------|--------|-----------------|-----|-------|----|----|
| --       | chr3 | 38885658 | G     | T  | --     | --     | IGR             | SNP | 0.242 | 25 | 8  |
| --       | chr3 | 38885659 | A     | T  | --     | --     | IGR             | SNP | 0.219 | 25 | 7  |
| SCN11A   | chr3 | 38921515 | G     | A  | C3319T | L1107L | Silent          | SNP | 0.917 | 2  | 22 |
| --       | chr3 | 39216899 | G     | A  | --     | --     | IGR             | SNP | 0.310 | 20 | 9  |
| MOBP     | chr3 | 39544365 | C     | T  | --     | --     | Intron          | SNP | 0.111 | 24 | 3  |
| --       | chr3 | 39615150 | C     | T  | --     | --     | IGR             | SNP | 0.515 | 16 | 17 |
| --       | chr3 | 39622938 | C     | T  | --     | --     | IGR             | SNP | 0.138 | 25 | 4  |
| --       | chr3 | 39622939 | A     | G  | --     | --     | IGR             | SNP | 0.138 | 25 | 4  |
| --       | chr3 | 39623173 | T     | C  | --     | --     | IGR             | SNP | 0.138 | 25 | 4  |
| --       | chr3 | 40387423 | G     | C  | --     | --     | IGR             | SNP | 0.333 | 6  | 3  |
| --       | chr3 | 41056639 | C     | G  | --     | --     | IGR             | SNP | 0.192 | 21 | 5  |
| ULK4     | chr3 | 41459873 | C     | G  | --     | --     | Intron          | SNP | 1.000 | 0  | 16 |
| ULK4     | chr3 | 41523339 | G     | A  | --     | --     | Intron          | SNP | 0.400 | 6  | 4  |
| ULK4     | chr3 | 41992661 | G     | A  | --     | --     | Intron          | SNP | 0.375 | 5  | 3  |
| TRAK1    | chr3 | 42238212 | TG    | -  | --     | --     | Intron          | DEL | 0.200 | 16 | 4  |
| --       | chr3 | 42292790 | G     | A  | --     | --     | IGR             | SNP | 0.679 | 9  | 19 |
| --       | chr3 | 42434679 | G     | T  | --     | --     | IGR             | SNP | 0.138 | 25 | 4  |
| SEC22C   | chr3 | 42592380 | G     | T  | --     | --     | 3'UTR           | SNP | 0.200 | 16 | 4  |
| --       | chr3 | 42715324 | C     | T  | --     | --     | IGR             | SNP | 0.222 | 14 | 4  |
| FAM198A  | chr3 | 43054246 | C     | A  | --     | --     | Intron          | SNP | 0.116 | 84 | 11 |
| ANO10    | chr3 | 43529525 | A     | G  | --     | --     | Intron          | SNP | 0.636 | 4  | 7  |
| --       | chr3 | 43679442 | G     | C  | --     | --     | IGR             | SNP | 0.759 | 7  | 22 |
| --       | chr3 | 43679749 | G     | C  | --     | --     | IGR             | SNP | 0.794 | 7  | 27 |
| --       | chr3 | 43973115 | T     | C  | --     | --     | IGR             | SNP | 0.882 | 4  | 30 |
| C3orf77  | chr3 | 44353656 | G     | C  | --     | --     | Intron          | SNP | 0.879 | 4  | 29 |
| GDCP1    | chr3 | 45134348 | C     | T  | --     | --     | Intron          | SNP | 0.897 | 3  | 26 |
| --       | chr3 | 45246797 | T     | G  | --     | --     | IGR             | SNP | 0.909 | 2  | 20 |
| LIMD1    | chr3 | 45666391 | G     | T  | --     | --     | Intron          | SNP | 0.235 | 13 | 4  |
| LIMD1    | chr3 | 45672930 | G     | T  | --     | --     | Intron          | SNP | 0.405 | 22 | 15 |
| LRRC2    | chr3 | 46564250 | A     | C  | --     | --     | Intron          | SNP | 0.200 | 12 | 3  |
| SMARCC1  | chr3 | 47762654 | C     | G  | --     | --     | Intron          | SNP | 0.853 | 5  | 29 |
| SMARCC1  | chr3 | 47762781 | C     | G  | --     | --     | Intron          | SNP | 0.905 | 2  | 19 |
| WDR6     | chr3 | 49046758 | G     | C  | --     | --     | Intron          | SNP | 0.333 | 6  | 3  |
| --       | chr3 | 49171634 | G     | T  | --     | --     | IGR             | SNP | 0.714 | 2  | 5  |
| --       | chr3 | 49193733 | G     | C  | --     | --     | IGR             | SNP | 0.889 | 1  | 8  |
| --       | chr3 | 49197394 | T     | C  | --     | --     | IGR             | SNP | 0.778 | 2  | 7  |
| CCDC36   | chr3 | 49273362 | C     | A  | --     | --     | Intron          | SNP | 0.400 | 6  | 4  |
| USP4     | chr3 | 49364442 | T     | C  | --     | --     | Intron          | SNP | 0.444 | 20 | 16 |
| RHOA     | chr3 | 49411672 | C     | A  | --     | --     | Intron          | SNP | 0.773 | 5  | 17 |
| --       | chr3 | 49494244 | A     | C  | --     | --     | IGR             | SNP | 0.300 | 7  | 3  |
| BSN      | chr3 | 49627021 | C     | T  | --     | --     | Intron          | SNP | 0.720 | 7  | 18 |
| MST1     | chr3 | 49723522 | G     | A  | C1120T | R374C  | Missense_mutati | SNP | 0.158 | 32 | 6  |
| TRAIIP   | chr3 | 49890059 | G     | A  | --     | --     | Intron          | SNP | 0.800 | 4  | 16 |
| CAMKV    | chr3 | 49905204 | G     | C  | --     | --     | Intron          | SNP | 0.900 | 2  | 18 |
| RBM6     | chr3 | 50023972 | G     | A  | --     | --     | Intron          | SNP | 0.929 | 1  | 13 |
| MANF     | chr3 | 51422757 | G     | T  | --     | --     | 5'UTR           | SNP | 0.375 | 5  | 3  |
| DNAH1    | chr3 | 52372887 | C     | A  | --     | --     | Intron          | SNP | 0.250 | 9  | 3  |
| SEMA3G   | chr3 | 52478620 | C     | T  | --     | --     | Intron          | SNP | 0.129 | 27 | 4  |
| NT5DC2   | chr3 | 52559178 | GGGGT | -  | --     | --     | Intron          | DEL | 0.200 | 16 | 4  |
| PBRM1    | chr3 | 52681945 | TC    | -  | --     | --     | Intron          | DEL | 0.136 | 19 | 3  |
| DCP1A    | chr3 | 53348686 | C     | T  | --     | --     | Intron          | SNP | 0.222 | 14 | 4  |
| --       | chr3 | 53405001 | C     | G  | --     | --     | IGR             | SNP | 0.273 | 16 | 6  |
| --       | chr3 | 53451480 | C     | T  | --     | --     | IGR             | SNP | 0.440 | 14 | 11 |
| --       | chr3 | 53463917 | A     | T  | --     | --     | IGR             | SNP | 0.861 | 5  | 31 |
| CACNA1D  | chr3 | 53536074 | C     | T  | --     | --     | Intron          | SNP | 0.192 | 21 | 5  |
| CACNA1D  | chr3 | 53575193 | G     | A  | --     | --     | Intron          | SNP | 0.280 | 18 | 7  |
| CACNA2D3 | chr3 | 54322370 | G     | A  | --     | --     | Intron          | SNP | 0.333 | 4  | 2  |
| CACNA2D3 | chr3 | 54363516 | A     | T  | --     | --     | Intron          | SNP | 0.375 | 15 | 9  |
| CACNA2D3 | chr3 | 54485256 | C     | T  | --     | --     | Intron          | SNP | 0.385 | 8  | 5  |
| CACNA2D3 | chr3 | 54676552 | CT    | -  | --     | --     | Intron          | DEL | 0.105 | 17 | 2  |
| CACNA2D3 | chr3 | 54944825 | C     | T  | --     | --     | Intron          | SNP | 0.273 | 32 | 12 |
| --       | chr3 | 55323318 | G     | T  | --     | --     | IGR             | SNP | 0.367 | 19 | 11 |
| --       | chr3 | 55487960 | T     | A  | --     | --     | IGR             | SNP | 0.909 | 3  | 30 |
| ERC2     | chr3 | 55610353 | T     | A  | --     | --     | Intron          | SNP | 0.194 | 25 | 6  |
| ERC2     | chr3 | 55898893 | CCAT  | -  | --     | --     | Intron          | DEL | 0.814 | 8  | 35 |
| ERC2     | chr3 | 55925465 | A     | T  | --     | --     | Intron          | SNP | 0.200 | 16 | 4  |
| ERC2     | chr3 | 56206314 | C     | A  | --     | --     | Intron          | SNP | 0.417 | 14 | 10 |
| ERC2     | chr3 | 56436024 | G     | C  | --     | --     | Intron          | SNP | 0.718 | 11 | 28 |
| ERC2     | chr3 | 56468481 | G     | C  | C555G  | F185L  | Missense_mutati | SNP | 0.821 | 7  | 32 |
| --       | chr3 | 56576923 | C     | G  | --     | --     | IGR             | SNP | 0.200 | 16 | 4  |
| FAM208A  | chr3 | 56665604 | G     | T  | --     | --     | Intron          | SNP | 0.286 | 10 | 4  |
| APPL1    | chr3 | 57265392 | A     | T  | --     | --     | Intron          | SNP | 0.455 | 6  | 5  |
| SLMAP    | chr3 | 57751892 | A     | T  | --     | --     | Intron          | SNP | 0.333 | 6  | 3  |
| --       | chr3 | 58451313 | G     | T  | --     | --     | IGR             | SNP | 0.238 | 16 | 5  |
| KCTD6    | chr3 | 58488412 | C     | T  | --     | --     | 3'Flank         | SNP | 0.424 | 19 | 14 |
| --       | chr3 | 58604071 | G     | T  | --     | --     | IGR             | SNP | 0.867 | 4  | 26 |
| C3orf67  | chr3 | 58828506 | -     | GA | --     | --     | Intron          | INS | 0.167 | 15 | 3  |
| --       | chr3 | 59194854 | C     | T  | --     | --     | IGR             | SNP | 0.886 | 5  | 39 |
| --       | chr3 | 59208704 | T     | A  | --     | --     | IGR             | SNP | 0.130 | 20 | 3  |
| --       | chr3 | 59310194 | C     | A  | --     | --     | IGR             | SNP | 0.923 | 2  | 24 |

|                  |      |          |     |     |       |      |                 |     |       |    |    |
|------------------|------|----------|-----|-----|-------|------|-----------------|-----|-------|----|----|
| --               | chr3 | 59351465 | -   | AAG | --    | --   | IGR             | INS | 0.378 | 26 | 17 |
| --               | chr3 | 59548922 | G   | T   | --    | --   | IGR             | SNP | 0.839 | 5  | 26 |
| <i>FHIT</i>      | chr3 | 60461506 | C   | T   | --    | --   | Intron          | SNP | 0.919 | 3  | 34 |
| <i>FHIT</i>      | chr3 | 60553990 | C   | A   | --    | --   | Intron          | SNP | 0.444 | 5  | 4  |
| <i>FHIT</i>      | chr3 | 60597469 | A   | T   | --    | --   | Intron          | SNP | 0.128 | 41 | 6  |
| <i>FHIT</i>      | chr3 | 60774922 | G   | A   | --    | --   | Intron          | SNP | 0.667 | 1  | 2  |
| <i>FHIT</i>      | chr3 | 60861637 | A   | G   | --    | --   | Intron          | SNP | 0.286 | 10 | 4  |
| <i>FHIT</i>      | chr3 | 60861638 | A   | T   | --    | --   | Intron          | SNP | 0.231 | 10 | 3  |
| <i>FHIT</i>      | chr3 | 61202217 | G   | A   | --    | --   | Intron          | SNP | 0.143 | 18 | 3  |
| --               | chr3 | 61484626 | A   | G   | --    | --   | IGR             | SNP | 0.152 | 39 | 7  |
| --               | chr3 | 61484627 | G   | T   | --    | --   | IGR             | SNP | 0.152 | 39 | 7  |
| <i>PTPRG</i>     | chr3 | 61935577 | G   | A   | --    | --   | Intron          | SNP | 0.789 | 4  | 15 |
| <i>CADPS</i>     | chr3 | 62484460 | T   | A   | --    | --   | Intron          | SNP | 1.000 | 0  | 27 |
| --               | chr3 | 63017547 | C   | A   | --    | --   | IGR             | SNP | 0.250 | 12 | 4  |
| <i>LOC285401</i> | chr3 | 63097279 | T   | A   | --    | --   | RNA             | SNP | 0.765 | 4  | 13 |
| <i>LOC285401</i> | chr3 | 63097280 | T   | A   | --    | --   | RNA             | SNP | 0.765 | 4  | 13 |
| <i>SYNPR</i>     | chr3 | 63436747 | C   | G   | --    | --   | Intron          | SNP | 0.105 | 34 | 4  |
| <i>SYNPR</i>     | chr3 | 63557299 | G   | A   | --    | --   | Intron          | SNP | 0.567 | 13 | 17 |
| <i>SYNPR</i>     | chr3 | 63576483 | A   | G   | --    | --   | Intron          | SNP | 0.500 | 4  | 4  |
| --               | chr3 | 63616437 | G   | A   | --    | --   | IGR             | SNP | 0.167 | 30 | 6  |
| --               | chr3 | 63762227 | T   | A   | --    | --   | IGR             | SNP | 0.342 | 25 | 13 |
| <i>ATXN7</i>     | chr3 | 63884788 | G   | A   | --    | --   | Intron          | SNP | 0.563 | 7  | 9  |
| --               | chr3 | 64231001 | G   | T   | --    | --   | IGR             | SNP | 0.294 | 24 | 10 |
| --               | chr3 | 64359740 | A   | T   | --    | --   | IGR             | SNP | 0.222 | 21 | 6  |
| <i>ADAMTS9</i>   | chr3 | 64609139 | T   | A   | --    | --   | Intron          | SNP | 0.143 | 24 | 4  |
| --               | chr3 | 65109880 | C   | T   | --    | --   | IGR             | SNP | 0.231 | 10 | 3  |
| --               | chr3 | 65164920 | T   | A   | --    | --   | IGR             | SNP | 0.359 | 25 | 14 |
| <i>MAGI1</i>     | chr3 | 65349840 | T   | A   | --    | --   | Intron          | SNP | 0.267 | 11 | 4  |
| <i>MAGI1</i>     | chr3 | 65446253 | G   | C   | --    | --   | Intron          | SNP | 0.780 | 9  | 32 |
| <i>MAGI1</i>     | chr3 | 65495330 | CG  | -   | --    | --   | Intron          | DEL | 0.150 | 17 | 3  |
| <i>MAGI1</i>     | chr3 | 65583380 | G   | C   | --    | --   | Intron          | SNP | 0.429 | 4  | 3  |
| --               | chr3 | 66043207 | G   | T   | --    | --   | IGR             | SNP | 0.333 | 6  | 3  |
| --               | chr3 | 66068078 | C   | A   | --    | --   | IGR             | SNP | 0.400 | 6  | 4  |
| --               | chr3 | 66612787 | T   | A   | --    | --   | IGR             | SNP | 0.306 | 25 | 11 |
| --               | chr3 | 66988710 | TAG | -   | --    | --   | IGR             | DEL | 0.105 | 17 | 2  |
| --               | chr3 | 67364286 | T   | C   | --    | --   | IGR             | SNP | 0.872 | 5  | 34 |
| <i>FAM19A1</i>   | chr3 | 68429414 | A   | G   | --    | --   | Intron          | SNP | 0.167 | 15 | 3  |
| <i>FAM19A1</i>   | chr3 | 68466420 | C   | G   | --    | --   | Intron          | SNP | 0.139 | 31 | 5  |
| <i>FAM19A1</i>   | chr3 | 68466492 | C   | T   | C181T | R61W | Missense_mutati | SNP | 0.828 | 5  | 24 |
| --               | chr3 | 68685187 | C   | T   | --    | --   | IGR             | SNP | 0.167 | 20 | 4  |
| <i>FAM19A4</i>   | chr3 | 68916109 | T   | A   | --    | --   | Intron          | SNP | 0.360 | 16 | 9  |
| <i>LMOD3</i>     | chr3 | 69162251 | T   | G   | --    | --   | Intron          | SNP | 0.219 | 25 | 7  |
| <i>FRMD4B</i>    | chr3 | 69251964 | G   | A   | --    | --   | Intron          | SNP | 0.793 | 6  | 23 |
| --               | chr3 | 70080034 | A   | T   | --    | --   | IGR             | SNP | 0.586 | 12 | 17 |
| --               | chr3 | 70461817 | A   | G   | --    | --   | IGR             | SNP | 0.861 | 5  | 31 |
| --               | chr3 | 70473999 | C   | A   | --    | --   | IGR             | SNP | 0.588 | 7  | 10 |
| --               | chr3 | 70476506 | A   | T   | --    | --   | IGR             | SNP | 0.379 | 18 | 11 |
| --               | chr3 | 70597427 | T   | A   | --    | --   | IGR             | SNP | 0.188 | 26 | 6  |
| --               | chr3 | 70829314 | A   | T   | --    | --   | IGR             | SNP | 0.643 | 5  | 9  |
| <i>FOXP1</i>     | chr3 | 71213156 | G   | A   | --    | --   | Intron          | SNP | 0.828 | 5  | 24 |
| <i>FOXP1</i>     | chr3 | 71223979 | C   | A   | --    | --   | Intron          | SNP | 0.176 | 14 | 3  |
| <i>FOXP1</i>     | chr3 | 71300539 | C   | T   | --    | --   | Intron          | SNP | 0.900 | 5  | 45 |
| --               | chr3 | 71838744 | T   | A   | --    | --   | IGR             | SNP | 0.211 | 15 | 4  |
| --               | chr3 | 72246408 | G   | A   | --    | --   | IGR             | SNP | 0.875 | 3  | 21 |
| --               | chr3 | 72281027 | -   | AT  | --    | --   | IGR             | INS | 0.346 | 34 | 18 |
| --               | chr3 | 72357276 | C   | T   | --    | --   | IGR             | SNP | 0.235 | 13 | 4  |
| --               | chr3 | 72361697 | C   | T   | --    | --   | IGR             | SNP | 0.857 | 4  | 24 |
| --               | chr3 | 72405230 | C   | A   | --    | --   | IGR             | SNP | 0.462 | 7  | 6  |
| <i>RYBP</i>      | chr3 | 72465721 | A   | C   | --    | --   | Intron          | SNP | 0.154 | 22 | 4  |
| --               | chr3 | 72594545 | G   | T   | --    | --   | IGR             | SNP | 0.190 | 17 | 4  |
| --               | chr3 | 72603502 | C   | A   | --    | --   | IGR             | SNP | 0.250 | 21 | 7  |
| --               | chr3 | 72603503 | T   | A   | --    | --   | IGR             | SNP | 0.250 | 21 | 7  |
| --               | chr3 | 72921923 | G   | C   | --    | --   | IGR             | SNP | 0.864 | 3  | 19 |
| --               | chr3 | 73043585 | G   | A   | --    | --   | IGR             | SNP | 0.188 | 13 | 3  |
| --               | chr3 | 73125439 | T   | G   | --    | --   | IGR             | SNP | 0.269 | 19 | 7  |
| --               | chr3 | 73125440 | G   | T   | --    | --   | IGR             | SNP | 0.231 | 20 | 6  |
| --               | chr3 | 73211339 | G   | T   | --    | --   | IGR             | SNP | 0.158 | 16 | 3  |
| --               | chr3 | 73378540 | G   | A   | --    | --   | IGR             | SNP | 0.325 | 27 | 13 |
| --               | chr3 | 73766801 | G   | C   | --    | --   | IGR             | SNP | 0.909 | 4  | 40 |
| --               | chr3 | 73919016 | G   | A   | --    | --   | IGR             | SNP | 0.905 | 2  | 19 |
| --               | chr3 | 74179421 | G   | A   | --    | --   | IGR             | SNP | 0.741 | 7  | 20 |
| <i>CNTN3</i>     | chr3 | 74435725 | G   | T   | --    | --   | Intron          | SNP | 0.914 | 3  | 32 |
| --               | chr3 | 74593273 | A   | G   | --    | --   | IGR             | SNP | 0.500 | 12 | 12 |
| --               | chr3 | 74621951 | G   | A   | --    | --   | IGR             | SNP | 0.839 | 5  | 26 |
| --               | chr3 | 75174261 | C   | T   | --    | --   | IGR             | SNP | 0.333 | 18 | 9  |
| --               | chr3 | 75174263 | C   | T   | --    | --   | IGR             | SNP | 0.333 | 18 | 9  |
| --               | chr3 | 75319337 | T   | C   | --    | --   | IGR             | SNP | 0.154 | 33 | 6  |
| --               | chr3 | 75319494 | T   | C   | --    | --   | IGR             | SNP | 0.100 | 27 | 3  |
| --               | chr3 | 75319495 | G   | A   | --    | --   | IGR             | SNP | 0.103 | 26 | 3  |
| --               | chr3 | 75418548 | T   | G   | --    | --   | IGR             | SNP | 0.294 | 24 | 10 |

|        |      |          |     |    |    |    |        |     |       |     |    |
|--------|------|----------|-----|----|----|----|--------|-----|-------|-----|----|
| --     | chr3 | 75435466 | C   | T  | -- | -- | IGR    | SNP | 0.300 | 14  | 6  |
| --     | chr3 | 75435479 | G   | C  | -- | -- | IGR    | SNP | 0.250 | 18  | 6  |
| --     | chr3 | 75435685 | C   | A  | -- | -- | IGR    | SNP | 0.148 | 23  | 4  |
| --     | chr3 | 75491535 | A   | T  | -- | -- | IGR    | SNP | 0.826 | 4   | 19 |
| --     | chr3 | 75498016 | G   | C  | -- | -- | IGR    | SNP | 0.255 | 41  | 14 |
| --     | chr3 | 75501799 | T   | G  | -- | -- | IGR    | SNP | 0.146 | 35  | 6  |
| --     | chr3 | 75501805 | T   | C  | -- | -- | IGR    | SNP | 0.140 | 37  | 6  |
| --     | chr3 | 75501834 | T   | A  | -- | -- | IGR    | SNP | 0.128 | 41  | 6  |
| --     | chr3 | 75505562 | A   | T  | -- | -- | IGR    | SNP | 0.150 | 17  | 3  |
| --     | chr3 | 75513475 | G   | A  | -- | -- | IGR    | SNP | 0.462 | 7   | 6  |
| --     | chr3 | 75517247 | A   | G  | -- | -- | IGR    | SNP | 0.235 | 13  | 4  |
| --     | chr3 | 75554547 | T   | G  | -- | -- | IGR    | SNP | 0.235 | 13  | 4  |
| --     | chr3 | 75579538 | A   | C  | -- | -- | IGR    | SNP | 0.235 | 13  | 4  |
| --     | chr3 | 75587476 | C   | A  | -- | -- | IGR    | SNP | 0.214 | 11  | 3  |
| --     | chr3 | 75588727 | T   | C  | -- | -- | IGR    | SNP | 0.190 | 17  | 4  |
| --     | chr3 | 75620602 | G   | A  | -- | -- | IGR    | SNP | 0.600 | 2   | 3  |
| --     | chr3 | 75622113 | A   | G  | -- | -- | IGR    | SNP | 0.135 | 32  | 5  |
| --     | chr3 | 75622818 | AT  | -  | -- | -- | IGR    | DEL | 0.105 | 17  | 2  |
| --     | chr3 | 75624074 | T   | C  | -- | -- | IGR    | SNP | 0.231 | 10  | 3  |
| --     | chr3 | 75636064 | C   | A  | -- | -- | IGR    | SNP | 0.120 | 22  | 3  |
| ZNF717 | chr3 | 75809680 | G   | A  | -- | -- | Intron | SNP | 0.176 | 28  | 6  |
| ZNF717 | chr3 | 75809722 | A   | T  | -- | -- | Intron | SNP | 0.194 | 29  | 7  |
| ZNF717 | chr3 | 75813962 | C   | T  | -- | -- | Intron | SNP | 0.233 | 33  | 10 |
| ZNF717 | chr3 | 75818993 | A   | C  | -- | -- | Intron | SNP | 0.200 | 20  | 5  |
| --     | chr3 | 75837266 | C   | T  | -- | -- | IGR    | SNP | 0.118 | 30  | 4  |
| --     | chr3 | 75837287 | C   | T  | -- | -- | IGR    | SNP | 0.129 | 27  | 4  |
| --     | chr3 | 75839593 | T   | C  | -- | -- | IGR    | SNP | 0.100 | 36  | 4  |
| --     | chr3 | 75869942 | A   | G  | -- | -- | IGR    | SNP | 0.240 | 19  | 6  |
| --     | chr3 | 75887434 | T   | G  | -- | -- | IGR    | SNP | 0.148 | 23  | 4  |
| --     | chr3 | 75894869 | -   | GT | -- | -- | IGR    | INS | 0.111 | 16  | 2  |
| --     | chr3 | 75902223 | C   | T  | -- | -- | IGR    | SNP | 0.148 | 23  | 4  |
| --     | chr3 | 76140545 | A   | G  | -- | -- | IGR    | SNP | 0.421 | 11  | 8  |
| --     | chr3 | 76212763 | T   | A  | -- | -- | IGR    | SNP | 0.150 | 17  | 3  |
| --     | chr3 | 76394137 | T   | G  | -- | -- | IGR    | SNP | 0.429 | 16  | 12 |
| --     | chr3 | 76757627 | C   | T  | -- | -- | IGR    | SNP | 0.429 | 12  | 9  |
| --     | chr3 | 76796773 | T   | G  | -- | -- | IGR    | SNP | 0.917 | 1   | 11 |
| --     | chr3 | 77061850 | G   | C  | -- | -- | IGR    | SNP | 0.800 | 4   | 16 |
| ROBO2  | chr3 | 77104017 | T   | C  | -- | -- | Intron | SNP | 0.750 | 4   | 12 |
| ROBO2  | chr3 | 77113934 | C   | G  | -- | -- | Intron | SNP | 0.800 | 4   | 16 |
| ROBO2  | chr3 | 77459823 | T   | C  | -- | -- | Intron | SNP | 0.103 | 78  | 9  |
| ROBO2  | chr3 | 77663869 | C   | A  | -- | -- | Intron | SNP | 0.197 | 57  | 14 |
| --     | chr3 | 77730983 | A   | G  | -- | -- | IGR    | SNP | 0.163 | 103 | 20 |
| --     | chr3 | 77797782 | G   | T  | -- | -- | IGR    | SNP | 0.198 | 77  | 19 |
| --     | chr3 | 78107367 | T   | A  | -- | -- | IGR    | SNP | 0.144 | 95  | 16 |
| --     | chr3 | 78313313 | G   | C  | -- | -- | IGR    | SNP | 0.261 | 82  | 29 |
| --     | chr3 | 78557040 | G   | A  | -- | -- | IGR    | SNP | 0.100 | 72  | 8  |
| ROBO1  | chr3 | 79194193 | C   | T  | -- | -- | Intron | SNP | 0.333 | 18  | 9  |
| ROBO1  | chr3 | 79691943 | C   | A  | -- | -- | Intron | SNP | 0.321 | 19  | 9  |
| --     | chr3 | 79843443 | C   | A  | -- | -- | IGR    | SNP | 0.143 | 24  | 4  |
| --     | chr3 | 80216014 | G   | T  | -- | -- | IGR    | SNP | 0.857 | 3   | 18 |
| --     | chr3 | 80276969 | T   | C  | -- | -- | IGR    | SNP | 0.161 | 26  | 5  |
| --     | chr3 | 80389694 | C   | A  | -- | -- | IGR    | SNP | 0.459 | 20  | 17 |
| --     | chr3 | 80650331 | A   | T  | -- | -- | IGR    | SNP | 0.520 | 12  | 13 |
| --     | chr3 | 80742696 | T   | A  | -- | -- | IGR    | SNP | 0.476 | 22  | 20 |
| --     | chr3 | 80945311 | G   | A  | -- | -- | IGR    | SNP | 0.615 | 5   | 8  |
| --     | chr3 | 81425072 | TC  | -  | -- | -- | IGR    | DEL | 0.321 | 19  | 9  |
| --     | chr3 | 81461852 | G   | T  | -- | -- | IGR    | SNP | 0.650 | 7   | 13 |
| GBE1   | chr3 | 81670278 | G   | C  | -- | -- | Intron | SNP | 0.545 | 15  | 18 |
| GBE1   | chr3 | 81670443 | A   | C  | -- | -- | Intron | SNP | 0.538 | 18  | 21 |
| --     | chr3 | 81820303 | G   | A  | -- | -- | IGR    | SNP | 0.821 | 5   | 23 |
| --     | chr3 | 81870335 | T   | G  | -- | -- | IGR    | SNP | 1.000 | 0   | 31 |
| --     | chr3 | 81939081 | A   | T  | -- | -- | IGR    | SNP | 0.318 | 15  | 7  |
| --     | chr3 | 82019425 | C   | A  | -- | -- | IGR    | SNP | 0.286 | 10  | 4  |
| --     | chr3 | 82207950 | C   | A  | -- | -- | IGR    | SNP | 0.844 | 5   | 27 |
| --     | chr3 | 82210070 | A   | C  | -- | -- | IGR    | SNP | 0.192 | 21  | 5  |
| --     | chr3 | 82395983 | A   | G  | -- | -- | IGR    | SNP | 0.545 | 10  | 12 |
| --     | chr3 | 82456764 | T   | G  | -- | -- | IGR    | SNP | 0.515 | 16  | 17 |
| --     | chr3 | 82649744 | A   | T  | -- | -- | IGR    | SNP | 0.875 | 2   | 14 |
| --     | chr3 | 82729074 | -   | TC | -- | -- | IGR    | INS | 0.250 | 21  | 7  |
| --     | chr3 | 83167630 | G   | A  | -- | -- | IGR    | SNP | 0.846 | 4   | 22 |
| --     | chr3 | 83208463 | G   | T  | -- | -- | IGR    | SNP | 0.773 | 5   | 17 |
| --     | chr3 | 83239038 | C   | A  | -- | -- | IGR    | SNP | 0.875 | 3   | 21 |
| --     | chr3 | 83418080 | A   | C  | -- | -- | IGR    | SNP | 0.800 | 6   | 24 |
| --     | chr3 | 83571679 | G   | T  | -- | -- | IGR    | SNP | 0.783 | 5   | 18 |
| --     | chr3 | 83668180 | A   | C  | -- | -- | IGR    | SNP | 0.529 | 8   | 9  |
| --     | chr3 | 83894354 | GTC | -  | -- | -- | IGR    | DEL | 0.105 | 17  | 2  |
| --     | chr3 | 83965056 | C   | T  | -- | -- | IGR    | SNP | 1.000 | 0   | 7  |
| --     | chr3 | 84043771 | G   | T  | -- | -- | IGR    | SNP | 0.875 | 2   | 14 |
| --     | chr3 | 84064451 | T   | C  | -- | -- | IGR    | SNP | 0.850 | 3   | 17 |
| --     | chr3 | 84117851 | T   | G  | -- | -- | IGR    | SNP | 0.958 | 1   | 23 |

|               |      |           |       |     |       |       |                 |     |       |    |    |
|---------------|------|-----------|-------|-----|-------|-------|-----------------|-----|-------|----|----|
| --            | chr3 | 84182121  | G     | A   | --    | --    | IGR             | SNP | 0.346 | 17 | 9  |
| LOC440970     | chr3 | 84702484  | T     | A   | --    | --    | RNA             | SNP | 0.522 | 11 | 12 |
| LOC440970     | chr3 | 84703061  | A     | G   | --    | --    | RNA             | SNP | 0.414 | 17 | 12 |
| LOC440970     | chr3 | 84703680  | G     | C   | --    | --    | RNA             | SNP | 0.478 | 12 | 11 |
| LOC440970     | chr3 | 84763970  | C     | G   | --    | --    | RNA             | SNP | 0.452 | 17 | 14 |
| LOC440970     | chr3 | 84770423  | C     | A   | --    | --    | RNA             | SNP | 0.429 | 4  | 3  |
| --            | chr3 | 84945009  | C     | G   | --    | --    | IGR             | SNP | 0.450 | 11 | 9  |
| --            | chr3 | 84962746  | AC    | -   | --    | --    | IGR             | DEL | 0.538 | 12 | 14 |
| CADM2         | chr3 | 85448595  | C     | G   | --    | --    | Intron          | SNP | 0.188 | 13 | 3  |
| CADM2         | chr3 | 85448596  | T     | A   | --    | --    | Intron          | SNP | 0.188 | 13 | 3  |
| CADM2         | chr3 | 85448781  | A     | T   | --    | --    | Intron          | SNP | 0.120 | 22 | 3  |
| CADM2         | chr3 | 85448800  | G     | C   | --    | --    | Intron          | SNP | 0.158 | 16 | 3  |
| CADM2         | chr3 | 85531993  | T     | C   | --    | --    | Intron          | SNP | 0.529 | 8  | 9  |
| CADM2         | chr3 | 85684246  | T     | G   | --    | --    | Intron          | SNP | 0.913 | 2  | 21 |
| CADM2         | chr3 | 85684270  | T     | A   | --    | --    | Intron          | SNP | 1.000 | 0  | 21 |
| CADM2         | chr3 | 85811848  | A     | G   | --    | --    | Intron          | SNP | 0.933 | 1  | 14 |
| CADM2         | chr3 | 86048428  | T     | G   | --    | --    | Intron          | SNP | 0.500 | 4  | 4  |
| --            | chr3 | 86158875  | G     | C   | --    | --    | IGR             | SNP | 1.000 | 0  | 17 |
| --            | chr3 | 86240507  | T     | C   | --    | --    | IGR             | SNP | 0.852 | 4  | 23 |
| --            | chr3 | 86260006  | TTG   | -   | --    | --    | IGR             | DEL | 0.133 | 13 | 2  |
| --            | chr3 | 86266923  | C     | A   | --    | --    | IGR             | SNP | 0.226 | 24 | 7  |
| --            | chr3 | 86266924  | A     | C   | --    | --    | IGR             | SNP | 0.233 | 23 | 7  |
| --            | chr3 | 86636809  | -     | CCT | --    | --    | IGR             | INS | 0.607 | 11 | 17 |
| --            | chr3 | 86860517  | A     | G   | --    | --    | IGR             | SNP | 0.929 | 2  | 26 |
| --            | chr3 | 86958530  | G     | C   | --    | --    | IGR             | SNP | 0.853 | 5  | 29 |
| --            | chr3 | 87484884  | TC    | -   | --    | --    | IGR             | DEL | 0.556 | 8  | 10 |
| --            | chr3 | 87657063  | T     | A   | --    | --    | IGR             | SNP | 0.879 | 4  | 29 |
| --            | chr3 | 87753756  | C     | T   | --    | --    | IGR             | SNP | 0.947 | 2  | 36 |
| --            | chr3 | 87765428  | C     | T   | --    | --    | IGR             | SNP | 0.156 | 38 | 7  |
| --            | chr3 | 88469158  | T     | G   | --    | --    | IGR             | SNP | 0.783 | 5  | 18 |
| --            | chr3 | 88948963  | A     | T   | --    | --    | IGR             | SNP | 0.500 | 7  | 7  |
| EPHA3         | chr3 | 89184787  | G     | A   | --    | --    | Intron          | SNP | 0.692 | 4  | 9  |
| EPHA3         | chr3 | 89371284  | GGA   | -   | --    | --    | Intron          | DEL | 0.111 | 24 | 3  |
| EPHA3         | chr3 | 89424908  | G     | A   | --    | --    | Intron          | SNP | 0.212 | 26 | 7  |
| --            | chr3 | 89560575  | A     | T   | --    | --    | IGR             | SNP | 0.250 | 9  | 3  |
| --            | chr3 | 89923374  | TC    | -   | --    | --    | IGR             | DEL | 0.294 | 12 | 5  |
| --            | chr3 | 89988962  | G     | C   | --    | --    | IGR             | SNP | 0.235 | 13 | 4  |
| --            | chr3 | 90384969  | C     | T   | --    | --    | IGR             | SNP | 0.750 | 1  | 3  |
| --            | chr3 | 90435486  | A     | G   | --    | --    | IGR             | SNP | 0.333 | 6  | 3  |
| NSUN3         | chr3 | 93797511  | C     | A   | --    | --    | Intron          | SNP | 0.190 | 17 | 4  |
| --            | chr3 | 94144214  | T     | C   | --    | --    | IGR             | SNP | 0.353 | 11 | 6  |
| --            | chr3 | 94628284  | ATC   | -   | --    | --    | IGR             | DEL | 0.133 | 13 | 2  |
| LOC255025     | chr3 | 94661813  | C     | A   | --    | --    | RNA             | SNP | 0.458 | 13 | 11 |
| --            | chr3 | 94784637  | C     | T   | --    | --    | IGR             | SNP | 0.242 | 25 | 8  |
| --            | chr3 | 94904474  | C     | A   | --    | --    | IGR             | SNP | 0.962 | 1  | 25 |
| --            | chr3 | 94966030  | A     | T   | --    | --    | IGR             | SNP | 0.467 | 8  | 7  |
| --            | chr3 | 95234683  | A     | C   | --    | --    | IGR             | SNP | 0.821 | 5  | 23 |
| --            | chr3 | 95351950  | C     | T   | --    | --    | IGR             | SNP | 0.231 | 10 | 3  |
| --            | chr3 | 95410906  | T     | G   | --    | --    | IGR             | SNP | 1.000 | 0  | 6  |
| --            | chr3 | 95723857  | GCATA | -   | --    | --    | IGR             | DEL | 0.286 | 20 | 8  |
| --            | chr3 | 95808201  | T     | A   | --    | --    | IGR             | SNP | 0.333 | 16 | 8  |
| --            | chr3 | 95911063  | C     | T   | --    | --    | IGR             | SNP | 0.364 | 14 | 8  |
| EPHA6         | chr3 | 96555303  | C     | T   | --    | --    | Intron          | SNP | 0.361 | 23 | 13 |
| EPHA6         | chr3 | 96611828  | G     | A   | --    | --    | Intron          | SNP | 0.750 | 3  | 9  |
| EPHA6         | chr3 | 96671630  | T     | A   | --    | --    | Intron          | SNP | 0.348 | 15 | 8  |
| EPHA6         | chr3 | 96785102  | C     | G   | --    | --    | Intron          | SNP | 0.750 | 4  | 12 |
| EPHA6         | chr3 | 96803177  | AAC   | -   | --    | --    | Intron          | DEL | 0.111 | 16 | 2  |
| EPHA6         | chr3 | 96902256  | G     | A   | --    | --    | Intron          | SNP | 0.923 | 1  | 12 |
| EPHA6         | chr3 | 97012645  | C     | A   | --    | --    | Intron          | SNP | 0.105 | 34 | 4  |
| EPHA6         | chr3 | 97211391  | C     | A   | --    | --    | Intron          | SNP | 0.273 | 8  | 3  |
| EPHA6         | chr3 | 97238648  | A     | G   | --    | --    | Intron          | SNP | 0.917 | 1  | 11 |
| EPHA6         | chr3 | 97361623  | A     | T   | --    | --    | Intron          | SNP | 0.308 | 9  | 4  |
| EPHA6         | chr3 | 97409575  | G     | C   | --    | --    | Intron          | SNP | 0.556 | 12 | 15 |
| --            | chr3 | 97548319  | G     | T   | --    | --    | IGR             | SNP | 0.214 | 22 | 6  |
| --            | chr3 | 97595024  | T     | G   | --    | --    | IGR             | SNP | 0.931 | 2  | 27 |
| --            | chr3 | 97637656  | T     | A   | --    | --    | IGR             | SNP | 0.205 | 31 | 8  |
| GABRR3        | chr3 | 97745938  | G     | C   | --    | --    | Intron          | SNP | 0.938 | 1  | 15 |
| GABRR3        | chr3 | 97745997  | G     | T   | --    | --    | Intron          | SNP | 0.960 | 1  | 24 |
| GABRR3        | chr3 | 97746350  | G     | A   | --    | --    | Intron          | SNP | 0.708 | 7  | 17 |
| --            | chr3 | 97776116  | A     | G   | --    | --    | IGR             | SNP | 0.833 | 4  | 20 |
| --            | chr3 | 97798819  | GA    | -   | --    | --    | IGR             | DEL | 0.120 | 22 | 3  |
| OR5H15        | chr3 | 97887944  | C     | T   | C401T | A134V | Missense_mutati | SNP | 0.116 | 38 | 5  |
| --            | chr3 | 98394994  | T     | A   | --    | --    | IGR             | SNP | 0.400 | 9  | 6  |
| DCBLD2        | chr3 | 98605655  | T     | C   | --    | --    | Intron          | SNP | 0.115 | 23 | 3  |
| MIR548G       | chr3 | 99582514  | G     | C   | --    | --    | RNA             | SNP | 0.941 | 1  | 16 |
| MIR548G       | chr3 | 99666563  | G     | A   | --    | --    | RNA             | SNP | 0.839 | 5  | 26 |
| MIR548G       | chr3 | 99714687  | A     | T   | --    | --    | RNA             | SNP | 0.447 | 26 | 21 |
| C3orf26,FILIP | chr3 | 99721715  | G     | T   | --    | --    | Intron          | SNP | 0.370 | 17 | 10 |
| --            | chr3 | 100075728 | C     | A   | --    | --    | IGR             | SNP | 0.810 | 4  | 17 |
| TFG           | chr3 | 100434593 | G     | T   | --    | --    | Intron          | SNP | 1.000 | 0  | 25 |

|            |      |           |       |     |       |       |         |     |       |    |    |
|------------|------|-----------|-------|-----|-------|-------|---------|-----|-------|----|----|
| --         | chr3 | 100792459 | TAC   | -   | --    | --    | IGR     | DEL | 0.176 | 14 | 3  |
| SENP7      | chr3 | 101068664 | A     | T   | --    | --    | Intron  | SNP | 0.400 | 18 | 12 |
| --         | chr3 | 101436065 | C     | A   | --    | --    | IGR     | SNP | 0.444 | 5  | 4  |
| NFKBIZ     | chr3 | 101561156 | G     | A   | --    | --    | Intron  | SNP | 0.292 | 17 | 7  |
| --         | chr3 | 102448493 | G     | A   | --    | --    | IGR     | SNP | 0.400 | 12 | 8  |
| --         | chr3 | 102579041 | C     | G   | --    | --    | IGR     | SNP | 0.190 | 17 | 4  |
| --         | chr3 | 102719799 | C     | A   | --    | --    | IGR     | SNP | 0.750 | 4  | 12 |
| --         | chr3 | 102846459 | T     | C   | --    | --    | IGR     | SNP | 0.324 | 23 | 11 |
| --         | chr3 | 103120236 | C     | G   | --    | --    | IGR     | SNP | 0.333 | 14 | 7  |
| --         | chr3 | 103571534 | A     | G   | --    | --    | IGR     | SNP | 0.370 | 17 | 10 |
| --         | chr3 | 103896145 | G     | C   | --    | --    | IGR     | SNP | 0.808 | 5  | 21 |
| --         | chr3 | 104160608 | C     | G   | --    | --    | IGR     | SNP | 0.120 | 22 | 3  |
| --         | chr3 | 104160609 | A     | G   | --    | --    | IGR     | SNP | 0.120 | 22 | 3  |
| --         | chr3 | 104755448 | G     | T   | --    | --    | IGR     | SNP | 0.913 | 2  | 21 |
| --         | chr3 | 104817657 | G     | T   | --    | --    | IGR     | SNP | 0.167 | 20 | 4  |
| --         | chr3 | 104938689 | T     | C   | --    | --    | IGR     | SNP | 0.435 | 13 | 10 |
| --         | chr3 | 105019617 | C     | T   | --    | --    | IGR     | SNP | 0.333 | 6  | 3  |
| ALCAM      | chr3 | 105259055 | C     | A   | --    | --    | Intron  | SNP | 0.455 | 12 | 10 |
| CBLB       | chr3 | 105556927 | TC    | -   | --    | --    | Intron  | DEL | 0.118 | 15 | 2  |
| --         | chr3 | 105836424 | G     | C   | --    | --    | IGR     | SNP | 0.408 | 29 | 20 |
| --         | chr3 | 106513260 | C     | T   | --    | --    | IGR     | SNP | 0.357 | 9  | 5  |
| --         | chr3 | 106523420 | G     | A   | --    | --    | IGR     | SNP | 0.844 | 5  | 27 |
| --         | chr3 | 106643766 | C     | T   | --    | --    | IGR     | SNP | 0.150 | 17 | 3  |
| --         | chr3 | 107056951 | A     | G   | --    | --    | IGR     | SNP | 0.300 | 7  | 3  |
| BBX        | chr3 | 107471375 | C     | G   | --    | --    | Intron  | SNP | 0.206 | 27 | 7  |
| LOC285205  | chr3 | 107633681 | G     | T   | --    | --    | RNA     | SNP | 0.857 | 4  | 24 |
| --         | chr3 | 107734409 | T     | C   | --    | --    | IGR     | SNP | 0.457 | 19 | 16 |
| MYH15      | chr3 | 108232000 | C     | A   | --    | --    | Intron  | SNP | 0.111 | 24 | 3  |
| DZIP3      | chr3 | 108345267 | C     | A   | --    | --    | Intron  | SNP | 0.905 | 2  | 19 |
| DZIP3      | chr3 | 108411110 | TAGAC | -   | --    | --    | Intron  | DEL | 0.136 | 19 | 3  |
| DZIP3      | chr3 | 108411134 | A     | G   | --    | --    | Intron  | SNP | 0.136 | 19 | 3  |
| MORC1      | chr3 | 108813814 | G     | A   | C525T | S175S | Silent  | SNP | 0.577 | 11 | 15 |
| --         | chr3 | 108895432 | GAAT  | -   | --    | --    | IGR     | DEL | 0.125 | 14 | 2  |
| --         | chr3 | 109117369 | A     | C   | --    | --    | IGR     | SNP | 0.909 | 3  | 30 |
| FLJ25363   | chr3 | 109185586 | A     | T   | --    | --    | Intron  | SNP | 0.647 | 6  | 11 |
| --         | chr3 | 109218266 | G     | A   | --    | --    | IGR     | SNP | 0.750 | 8  | 24 |
| --         | chr3 | 109303036 | T     | G   | --    | --    | IGR     | SNP | 0.429 | 16 | 12 |
| --         | chr3 | 109464633 | T     | A   | --    | --    | IGR     | SNP | 0.792 | 5  | 19 |
| --         | chr3 | 109918071 | G     | A   | --    | --    | IGR     | SNP | 0.902 | 4  | 37 |
| --         | chr3 | 109941716 | A     | G   | --    | --    | IGR     | SNP | 0.464 | 15 | 13 |
| --         | chr3 | 110322257 | C     | A   | --    | --    | IGR     | SNP | 0.412 | 10 | 7  |
| --         | chr3 | 110392674 | C     | T   | --    | --    | IGR     | SNP | 0.667 | 7  | 14 |
| --         | chr3 | 110463574 | A     | G   | --    | --    | IGR     | SNP | 0.750 | 2  | 6  |
| --         | chr3 | 111046790 | C     | A   | --    | --    | IGR     | SNP | 0.167 | 15 | 3  |
| --         | chr3 | 111378709 | C     | G   | --    | --    | IGR     | SNP | 0.286 | 20 | 8  |
| PHLDB2,PLC | chr3 | 111548774 | A     | C   | --    | --    | Intron  | SNP | 0.273 | 8  | 3  |
| --         | chr3 | 112028091 | G     | A   | --    | --    | IGR     | SNP | 0.826 | 4  | 19 |
| --         | chr3 | 112101279 | G     | A   | --    | --    | IGR     | SNP | 0.240 | 19 | 6  |
| SLC35A5    | chr3 | 112303538 | C     | T   | --    | --    | 3'Flank | SNP | 0.103 | 26 | 3  |
| CCDC80     | chr3 | 112328592 | G     | A   | --    | --    | Intron  | SNP | 0.857 | 3  | 18 |
| --         | chr3 | 112530224 | T     | A   | --    | --    | IGR     | SNP | 0.174 | 19 | 4  |
| CD200R1L   | chr3 | 112544561 | G     | A   | --    | --    | Intron  | SNP | 1.000 | 0  | 18 |
| --         | chr3 | 112750442 | T     | C   | --    | --    | IGR     | SNP | 0.364 | 7  | 4  |
| KIAA2018   | chr3 | 113403644 | G     | A   | --    | --    | Intron  | SNP | 0.862 | 4  | 25 |
| --         | chr3 | 113828026 | AG    | -   | --    | --    | IGR     | DEL | 0.105 | 17 | 2  |
| ZBTB20     | chr3 | 114600060 | C     | A   | --    | --    | Intron  | SNP | 0.500 | 14 | 14 |
| ZBTB20     | chr3 | 114604282 | -     | GTT | --    | --    | Intron  | INS | 0.233 | 23 | 7  |
| --         | chr3 | 114892266 | A     | G   | --    | --    | IGR     | SNP | 0.929 | 2  | 26 |
| --         | chr3 | 115035898 | C     | T   | --    | --    | IGR     | SNP | 0.333 | 4  | 2  |
| --         | chr3 | 115099021 | C     | G   | --    | --    | IGR     | SNP | 0.447 | 21 | 17 |
| --         | chr3 | 115102724 | G     | A   | --    | --    | IGR     | SNP | 0.800 | 4  | 16 |
| GAP43      | chr3 | 115355794 | A     | C   | --    | --    | Intron  | SNP | 0.897 | 3  | 26 |
| --         | chr3 | 115508192 | TGA   | -   | --    | --    | IGR     | DEL | 0.114 | 31 | 4  |
| LSAMP      | chr3 | 115620441 | G     | T   | --    | --    | Intron  | SNP | 0.844 | 5  | 27 |
| LSAMP      | chr3 | 115966696 | G     | A   | --    | --    | Intron  | SNP | 0.333 | 20 | 10 |
| LSAMP      | chr3 | 116165148 | C     | A   | --    | --    | 5'Flank | SNP | 0.846 | 4  | 22 |
| --         | chr3 | 116175230 | C     | T   | --    | --    | IGR     | SNP | 0.429 | 4  | 3  |
| --         | chr3 | 116265168 | G     | A   | --    | --    | IGR     | SNP | 0.944 | 1  | 17 |
| --         | chr3 | 116337947 | G     | A   | --    | --    | IGR     | SNP | 0.818 | 4  | 18 |
| --         | chr3 | 116627218 | T     | A   | --    | --    | IGR     | SNP | 0.444 | 5  | 4  |
| --         | chr3 | 116737471 | C     | G   | --    | --    | IGR     | SNP | 0.450 | 22 | 18 |
| --         | chr3 | 116747065 | C     | A   | --    | --    | IGR     | SNP | 0.364 | 21 | 12 |
| --         | chr3 | 116756561 | C     | T   | --    | --    | IGR     | SNP | 0.444 | 5  | 4  |
| --         | chr3 | 116817465 | G     | T   | --    | --    | IGR     | SNP | 0.385 | 16 | 10 |
| --         | chr3 | 116817477 | C     | A   | --    | --    | IGR     | SNP | 0.350 | 13 | 7  |
| --         | chr3 | 116819931 | A     | G   | --    | --    | IGR     | SNP | 0.321 | 19 | 9  |
| --         | chr3 | 117110998 | G     | A   | --    | --    | IGR     | SNP | 0.933 | 1  | 14 |
| --         | chr3 | 117153794 | C     | T   | --    | --    | IGR     | SNP | 0.594 | 13 | 19 |
| --         | chr3 | 117224600 | C     | A   | --    | --    | IGR     | SNP | 0.133 | 26 | 4  |
| --         | chr3 | 117287400 | C     | T   | --    | --    | IGR     | SNP | 0.136 | 19 | 3  |

|                     |      |           |     |      |    |    |        |     |       |    |    |
|---------------------|------|-----------|-----|------|----|----|--------|-----|-------|----|----|
| --                  | chr3 | 117536088 | A   | T    | -- | -- | IGR    | SNP | 0.355 | 20 | 11 |
| --                  | chr3 | 117536089 | G   | T    | -- | -- | IGR    | SNP | 0.355 | 20 | 11 |
| --                  | chr3 | 117556891 | G   | C    | -- | -- | IGR    | SNP | 0.412 | 20 | 14 |
| --                  | chr3 | 117789215 | C   | A    | -- | -- | IGR    | SNP | 0.455 | 12 | 10 |
| --                  | chr3 | 117789216 | T   | C    | -- | -- | IGR    | SNP | 0.455 | 12 | 10 |
| --                  | chr3 | 117900185 | A   | T    | -- | -- | IGR    | SNP | 0.882 | 4  | 30 |
| --                  | chr3 | 117991185 | A   | T    | -- | -- | IGR    | SNP | 0.120 | 22 | 3  |
| --                  | chr3 | 119965182 | C   | T    | -- | -- | IGR    | SNP | 0.389 | 22 | 14 |
| <i>RABL3</i>        | chr3 | 120443189 | C   | A    | -- | -- | Intron | SNP | 0.214 | 11 | 3  |
| <i>STXBP5L</i>      | chr3 | 120709323 | AC  | -    | -- | -- | Intron | DEL | 0.143 | 12 | 2  |
| <i>STXBP5L</i>      | chr3 | 121002741 | GCT | -    | -- | -- | Intron | DEL | 0.136 | 19 | 3  |
| <i>STXBP5L</i>      | chr3 | 121086470 | A   | T    | -- | -- | Intron | SNP | 0.250 | 9  | 3  |
| <i>STXBP5L</i>      | chr3 | 121116727 | A   | G    | -- | -- | Intron | SNP | 0.138 | 25 | 4  |
| <i>POLQ</i>         | chr3 | 121249854 | G   | C    | -- | -- | Intron | SNP | 0.885 | 3  | 23 |
| <i>GOLGB1</i>       | chr3 | 121445302 | G   | A    | -- | -- | Intron | SNP | 0.364 | 7  | 4  |
| <i>EAF2</i>         | chr3 | 121562562 | T   | A    | -- | -- | Intron | SNP | 0.185 | 22 | 5  |
| <i>KPNA1</i>        | chr3 | 122210570 | CA  | -    | -- | -- | Intron | DEL | 0.267 | 11 | 4  |
| <i>PARP14</i>       | chr3 | 122421878 | C   | A    | -- | -- | Intron | SNP | 0.200 | 16 | 4  |
| --                  | chr3 | 123195057 | C   | T    | -- | -- | IGR    | SNP | 0.400 | 6  | 4  |
| <i>PTPLB</i>        | chr3 | 123256430 | CAT | -    | -- | -- | Intron | DEL | 0.143 | 12 | 2  |
| --                  | chr3 | 123681702 | G   | A    | -- | -- | IGR    | SNP | 0.115 | 23 | 3  |
| <i>KALRN</i>        | chr3 | 124252840 | G   | A    | -- | -- | Intron | SNP | 0.815 | 5  | 22 |
| <i>KALRN</i>        | chr3 | 124311152 | G   | A    | -- | -- | Intron | SNP | 0.235 | 13 | 4  |
| <i>KALRN</i>        | chr3 | 124417739 | A   | T    | -- | -- | Intron | SNP | 0.273 | 16 | 6  |
| <i>MUC13</i>        | chr3 | 124641460 | G   | T    | -- | -- | Intron | SNP | 0.231 | 10 | 3  |
| --                  | chr3 | 125417884 | A   | C    | -- | -- | IGR    | SNP | 0.250 | 21 | 7  |
| --                  | chr3 | 125449110 | G   | A    | -- | -- | IGR    | SNP | 0.367 | 19 | 11 |
| --                  | chr3 | 125537980 | G   | A    | -- | -- | IGR    | SNP | 0.333 | 20 | 10 |
| --                  | chr3 | 125549256 | A   | G    | -- | -- | IGR    | SNP | 0.167 | 20 | 4  |
| --                  | chr3 | 125554481 | A   | G    | -- | -- | IGR    | SNP | 0.227 | 17 | 5  |
| --                  | chr3 | 125554605 | C   | T    | -- | -- | IGR    | SNP | 0.182 | 27 | 6  |
| --                  | chr3 | 125555702 | T   | C    | -- | -- | IGR    | SNP | 0.235 | 13 | 4  |
| --                  | chr3 | 125559610 | G   | C    | -- | -- | IGR    | SNP | 0.119 | 37 | 5  |
| --                  | chr3 | 125559673 | A   | C    | -- | -- | IGR    | SNP | 0.167 | 25 | 5  |
| --                  | chr3 | 125565282 | G   | A    | -- | -- | IGR    | SNP | 0.105 | 34 | 4  |
| --                  | chr3 | 125602184 | T   | A    | -- | -- | IGR    | SNP | 0.132 | 33 | 5  |
| --                  | chr3 | 125611963 | -   | TACC | -- | -- | IGR    | INS | 0.105 | 17 | 2  |
| --                  | chr3 | 125627062 | G   | A    | -- | -- | IGR    | SNP | 0.129 | 27 | 4  |
| --                  | chr3 | 125630065 | G   | A    | -- | -- | IGR    | SNP | 0.350 | 26 | 14 |
| --                  | chr3 | 125630454 | C   | T    | -- | -- | IGR    | SNP | 0.364 | 7  | 4  |
| --                  | chr3 | 125630639 | T   | C    | -- | -- | IGR    | SNP | 0.286 | 10 | 4  |
| --                  | chr3 | 125630693 | G   | A    | -- | -- | IGR    | SNP | 0.138 | 25 | 4  |
| <i>LOC10012555</i>  | chr3 | 125645392 | C   | T    | -- | -- | RNA    | SNP | 0.448 | 16 | 13 |
| <i>LOC10012555</i>  | chr3 | 125645565 | C   | T    | -- | -- | RNA    | SNP | 0.560 | 11 | 14 |
| <i>LOC10012555</i>  | chr3 | 125645574 | G   | A    | -- | -- | RNA    | SNP | 0.536 | 13 | 15 |
| <i>ALG1L</i>        | chr3 | 125652365 | G   | A    | -- | -- | Intron | SNP | 0.156 | 27 | 5  |
| --                  | chr3 | 125909562 | G   | A    | -- | -- | IGR    | SNP | 0.545 | 15 | 18 |
| --                  | chr3 | 125955570 | G   | A    | -- | -- | IGR    | SNP | 0.200 | 12 | 3  |
| <i>CCDC37</i>       | chr3 | 126130231 | G   | T    | -- | -- | Intron | SNP | 0.364 | 7  | 4  |
| <i>CHCHD6</i>       | chr3 | 126580554 | G   | C    | -- | -- | Intron | SNP | 0.500 | 6  | 6  |
| --                  | chr3 | 126764469 | GGA | -    | -- | -- | IGR    | DEL | 0.120 | 22 | 3  |
| --                  | chr3 | 127096755 | AC  | -    | -- | -- | IGR    | DEL | 0.200 | 24 | 6  |
| --                  | chr3 | 127277221 | G   | A    | -- | -- | IGR    | SNP | 0.107 | 25 | 3  |
| --                  | chr3 | 127588726 | G   | C    | -- | -- | IGR    | SNP | 0.939 | 2  | 31 |
| <i>EEFSEC</i>       | chr3 | 128024968 | G   | C    | -- | -- | Intron | SNP | 0.964 | 1  | 27 |
| --                  | chr3 | 128282205 | C   | T    | -- | -- | IGR    | SNP | 0.804 | 9  | 37 |
| --                  | chr3 | 128675397 | A   | T    | -- | -- | IGR    | SNP | 0.321 | 19 | 9  |
| <i>ISY1-RAB43,F</i> | chr3 | 128806861 | G   | C    | -- | -- | 3'UTR  | SNP | 0.455 | 6  | 5  |
| <i>ISY1-RAB43,F</i> | chr3 | 128820697 | T   | A    | -- | -- | Intron | SNP | 0.167 | 20 | 4  |
| <i>ISY1-RAB43,F</i> | chr3 | 128820698 | C   | A    | -- | -- | Intron | SNP | 0.167 | 20 | 4  |
| <i>ISY1-RAB43,F</i> | chr3 | 128820710 | T   | C    | -- | -- | Intron | SNP | 0.120 | 22 | 3  |
| <i>ISY1-RAB43</i>   | chr3 | 128844508 | T   | G    | -- | -- | Intron | SNP | 0.654 | 9  | 17 |
| --                  | chr3 | 128910483 | G   | T    | -- | -- | IGR    | SNP | 0.256 | 29 | 10 |
| <i>C3orf25</i>      | chr3 | 129122452 | -   | GC   | -- | -- | Intron | INS | 0.818 | 6  | 27 |
| <i>TMCC1</i>        | chr3 | 129519789 | G   | T    | -- | -- | Intron | SNP | 0.200 | 16 | 4  |
| --                  | chr3 | 129747751 | C   | G    | -- | -- | IGR    | SNP | 0.121 | 29 | 4  |
| --                  | chr3 | 129747778 | C   | T    | -- | -- | IGR    | SNP | 0.143 | 30 | 5  |
| <i>FAM86HP</i>      | chr3 | 129828163 | A   | G    | -- | -- | RNA    | SNP | 0.186 | 35 | 8  |
| <i>FAM86HP</i>      | chr3 | 129828229 | C   | A    | -- | -- | RNA    | SNP | 0.116 | 38 | 5  |
| <i>FAM86HP</i>      | chr3 | 129828418 | A   | G    | -- | -- | RNA    | SNP | 0.382 | 34 | 21 |
| <i>FAM86HP</i>      | chr3 | 129828444 | G   | A    | -- | -- | RNA    | SNP | 0.250 | 30 | 10 |
| <i>FAM86HP</i>      | chr3 | 129828561 | T   | C    | -- | -- | RNA    | SNP | 0.227 | 34 | 10 |
| <i>FAM86HP</i>      | chr3 | 129828629 | C   | G    | -- | -- | RNA    | SNP | 0.136 | 38 | 6  |
| --                  | chr3 | 129852072 | G   | C    | -- | -- | IGR    | SNP | 0.261 | 17 | 6  |
| --                  | chr3 | 129857733 | T   | G    | -- | -- | IGR    | SNP | 0.154 | 22 | 4  |
| --                  | chr3 | 129859567 | TA  | -    | -- | -- | IGR    | DEL | 0.175 | 33 | 7  |
| --                  | chr3 | 129859583 | G   | C    | -- | -- | IGR    | SNP | 0.129 | 27 | 4  |
| --                  | chr3 | 129867190 | T   | C    | -- | -- | IGR    | SNP | 0.190 | 17 | 4  |
| --                  | chr3 | 129878401 | C   | A    | -- | -- | IGR    | SNP | 0.130 | 20 | 3  |
| --                  | chr3 | 129878407 | G   | A    | -- | -- | IGR    | SNP | 0.125 | 21 | 3  |



|           |      |           |       |        |                       |                |         |       |       |    |    |
|-----------|------|-----------|-------|--------|-----------------------|----------------|---------|-------|-------|----|----|
| --        | chr3 | 129890563 | G     | C      | --                    | --             | IGR     | SNP   | 0.114 | 31 | 4  |
| --        | chr3 | 129895220 | T     | C      | --                    | --             | IGR     | SNP   | 0.143 | 18 | 3  |
| --        | chr3 | 129898269 | -     | TTGTTG | --                    | --             | IGR     | INS   | 0.161 | 26 | 5  |
| --        | chr3 | 129906921 | G     | T      | --                    | --             | IGR     | SNP   | 0.163 | 41 | 8  |
| --        | chr3 | 129907612 | T     | G      | --                    | --             | IGR     | SNP   | 0.133 | 26 | 4  |
| --        | chr3 | 129910290 | A     | T      | --                    | --             | IGR     | SNP   | 0.190 | 17 | 4  |
| --        | chr3 | 129926401 | A     | G      | --                    | --             | IGR     | SNP   | 0.467 | 8  | 7  |
| COL6A5    | chr3 | 130163956 | -     | CA     | --                    | --             | Intron  | INS   | 0.116 | 38 | 5  |
| COL6A5    | chr3 | 130168978 | G     | T      | --                    | --             | Intron  | SNP   | 0.857 | 2  | 12 |
| ATP2C1    | chr3 | 130716590 | G     | A      | G2384A,G236W795X,W790 | Nonsense_mutat | SNP     | 0.236 | 42    | 13 |    |
| CPNE4     | chr3 | 131333147 | C     | T      | --                    | --             | Intron  | SNP   | 0.493 | 37 | 36 |
| CPNE4     | chr3 | 131473157 | G     | C      | --                    | --             | Intron  | SNP   | 0.192 | 21 | 5  |
| CPNE4     | chr3 | 131680591 | C     | T      | --                    | --             | Intron  | SNP   | 0.444 | 30 | 24 |
| --        | chr3 | 131768478 | G     | A      | --                    | --             | IGR     | SNP   | 0.158 | 16 | 3  |
| --        | chr3 | 131768510 | A     | G      | --                    | --             | IGR     | SNP   | 0.136 | 19 | 3  |
| --        | chr3 | 131820131 | G     | T      | --                    | --             | IGR     | SNP   | 0.219 | 25 | 7  |
| --        | chr3 | 131859714 | C     | A      | --                    | --             | IGR     | SNP   | 0.188 | 13 | 3  |
| --        | chr3 | 131870303 | G     | C      | --                    | --             | IGR     | SNP   | 0.459 | 33 | 28 |
| --        | chr3 | 132024561 | G     | T      | --                    | --             | IGR     | SNP   | 0.167 | 35 | 7  |
| NPHP3-AS1 | chr3 | 132531304 | T     | C      | --                    | --             | RNA     | SNP   | 0.182 | 27 | 6  |
| TMEM108   | chr3 | 132873088 | G     | A      | --                    | --             | Intron  | SNP   | 0.588 | 7  | 10 |
| TMEM108   | chr3 | 132895360 | G     | C      | --                    | --             | Intron  | SNP   | 0.143 | 30 | 5  |
| TMEM108   | chr3 | 132895382 | G     | A      | --                    | --             | Intron  | SNP   | 0.185 | 22 | 5  |
| TMEM108   | chr3 | 132895580 | -     | CCT    | --                    | --             | Intron  | INS   | 0.139 | 31 | 5  |
| TMEM108   | chr3 | 133026435 | G     | C      | --                    | --             | Intron  | SNP   | 0.679 | 9  | 19 |
| TMEM108   | chr3 | 133063616 | G     | C      | --                    | --             | Intron  | SNP   | 0.256 | 32 | 11 |
| TMEM108   | chr3 | 133069671 | G     | T      | --                    | --             | Intron  | SNP   | 0.443 | 39 | 31 |
| BFSP2     | chr3 | 133149879 | T     | C      | --                    | --             | Intron  | SNP   | 0.106 | 42 | 5  |
| BFSP2     | chr3 | 133149991 | T     | C      | --                    | --             | Intron  | SNP   | 0.107 | 25 | 3  |
| CDV3      | chr3 | 133293238 | G     | A      | --                    | --             | Intron  | SNP   | 0.500 | 10 | 10 |
| --        | chr3 | 133435059 | C     | T      | --                    | --             | IGR     | SNP   | 0.100 | 36 | 4  |
| --        | chr3 | 133445137 | T     | C      | --                    | --             | IGR     | SNP   | 0.200 | 12 | 3  |
| --        | chr3 | 133445143 | T     | G      | --                    | --             | IGR     | SNP   | 0.200 | 12 | 3  |
| SLCO2A1   | chr3 | 133668556 | C     | T      | --                    | --             | Intron  | SNP   | 0.274 | 45 | 17 |
| --        | chr3 | 133771239 | C     | T      | --                    | --             | IGR     | SNP   | 0.482 | 29 | 27 |
| RYK       | chr3 | 133913262 | T     | A      | --                    | --             | Intron  | SNP   | 0.241 | 41 | 13 |
| --        | chr3 | 134193365 | G     | T      | --                    | --             | IGR     | SNP   | 0.188 | 13 | 3  |
| --        | chr3 | 134509896 | C     | T      | --                    | --             | IGR     | SNP   | 0.111 | 40 | 5  |
| EPHB1     | chr3 | 134526806 | C     | A      | --                    | --             | Intron  | SNP   | 0.506 | 40 | 41 |
| EPHB1     | chr3 | 134545111 | C     | A      | --                    | --             | Intron  | SNP   | 0.185 | 22 | 5  |
| --        | chr3 | 135381566 | A     | G      | --                    | --             | IGR     | SNP   | 0.167 | 15 | 3  |
| --        | chr3 | 135399736 | C     | A      | --                    | --             | IGR     | SNP   | 0.462 | 42 | 36 |
| --        | chr3 | 135407272 | G     | T      | --                    | --             | IGR     | SNP   | 0.429 | 4  | 3  |
| --        | chr3 | 135457566 | A     | C      | --                    | --             | IGR     | SNP   | 0.246 | 43 | 14 |
| --        | chr3 | 135517939 | C     | G      | --                    | --             | IGR     | SNP   | 0.217 | 36 | 10 |
| --        | chr3 | 135923589 | G     | C      | --                    | --             | IGR     | SNP   | 0.409 | 26 | 18 |
| PCCB      | chr3 | 136004046 | C     | A      | --                    | --             | Intron  | SNP   | 0.483 | 30 | 28 |
| STAG1     | chr3 | 136115468 | C     | G      | --                    | --             | Intron  | SNP   | 0.211 | 15 | 4  |
| STAG1     | chr3 | 136124664 | G     | A      | --                    | --             | Intron  | SNP   | 0.133 | 26 | 4  |
| STAG1     | chr3 | 136124665 | G     | A      | --                    | --             | Intron  | SNP   | 0.129 | 27 | 4  |
| STAG1     | chr3 | 136370237 | G     | A      | --                    | --             | Intron  | SNP   | 0.235 | 13 | 4  |
| --        | chr3 | 136516791 | T     | C      | --                    | --             | IGR     | SNP   | 0.132 | 46 | 7  |
| --        | chr3 | 136935504 | C     | T      | --                    | --             | IGR     | SNP   | 0.368 | 24 | 14 |
| --        | chr3 | 136951930 | A     | G      | --                    | --             | IGR     | SNP   | 0.143 | 42 | 7  |
| --        | chr3 | 136967568 | C     | A      | --                    | --             | IGR     | SNP   | 0.197 | 53 | 13 |
| --        | chr3 | 137086236 | C     | T      | --                    | --             | IGR     | SNP   | 0.180 | 41 | 9  |
| --        | chr3 | 137138051 | G     | T      | --                    | --             | IGR     | SNP   | 0.186 | 35 | 8  |
| --        | chr3 | 137171956 | A     | T      | --                    | --             | IGR     | SNP   | 0.313 | 11 | 5  |
| --        | chr3 | 137229279 | G     | C      | --                    | --             | IGR     | SNP   | 0.222 | 21 | 6  |
| --        | chr3 | 137339457 | G     | C      | --                    | --             | IGR     | SNP   | 0.105 | 51 | 6  |
| --        | chr3 | 137471563 | C     | A      | --                    | --             | IGR     | SNP   | 0.364 | 21 | 12 |
| --        | chr3 | 137516275 | A     | T      | --                    | --             | IGR     | SNP   | 0.422 | 37 | 27 |
| --        | chr3 | 137537885 | T     | A      | --                    | --             | IGR     | SNP   | 0.261 | 17 | 6  |
| --        | chr3 | 137616023 | G     | A      | --                    | --             | IGR     | SNP   | 0.444 | 25 | 20 |
| --        | chr3 | 137616125 | G     | T      | --                    | --             | IGR     | SNP   | 0.360 | 16 | 9  |
| --        | chr3 | 137653849 | T     | A      | --                    | --             | IGR     | SNP   | 0.194 | 25 | 6  |
| DZIP1L    | chr3 | 137810993 | A     | G      | --                    | --             | Intron  | SNP   | 0.185 | 44 | 10 |
| NME9      | chr3 | 138043162 | G     | C      | --                    | --             | Intron  | SNP   | 0.576 | 28 | 38 |
| CEP70     | chr3 | 138228679 | T     | A      | --                    | --             | Intron  | SNP   | 0.167 | 55 | 11 |
| PIK3CB    | chr3 | 138477462 | G     | A      | --                    | --             | Intron  | SNP   | 0.347 | 32 | 17 |
| --        | chr3 | 138487200 | G     | T      | --                    | --             | IGR     | SNP   | 0.507 | 34 | 35 |
| --        | chr3 | 138501670 | G     | T      | --                    | --             | IGR     | SNP   | 0.507 | 33 | 34 |
| PRR23A    | chr3 | 138725215 | G     | A      | --                    | --             | 5'Flank | SNP   | 0.350 | 39 | 21 |
| --        | chr3 | 138749210 | ATCTG | -      | --                    | --             | IGR     | DEL   | 0.167 | 15 | 3  |
| --        | chr3 | 138802744 | C     | G      | --                    | --             | IGR     | SNP   | 0.178 | 37 | 8  |
| --        | chr3 | 139009473 | G     | C      | --                    | --             | IGR     | SNP   | 0.240 | 38 | 12 |
| --        | chr3 | 139115162 | A     | T      | --                    | --             | IGR     | SNP   | 0.400 | 6  | 4  |
| --        | chr3 | 139620807 | A     | T      | --                    | --             | IGR     | SNP   | 0.388 | 30 | 19 |
| CLSTN2    | chr3 | 139942744 | C     | A      | --                    | --             | Intron  | SNP   | 0.213 | 48 | 13 |
| --        | chr3 | 140302941 | G     | A      | --                    | --             | IGR     | SNP   | 0.515 | 33 | 35 |

|                |      |           |    |     |        |       |                 |     |       |    |    |
|----------------|------|-----------|----|-----|--------|-------|-----------------|-----|-------|----|----|
| --             | chr3 | 140335966 | G  | A   | --     | --    | IGR             | SNP | 0.295 | 43 | 18 |
| --             | chr3 | 140538706 | C  | T   | --     | --    | IGR             | SNP | 0.230 | 57 | 17 |
| --             | chr3 | 140562131 | A  | G   | --     | --    | IGR             | SNP | 0.375 | 40 | 24 |
| --             | chr3 | 140572763 | A  | G   | --     | --    | IGR             | SNP | 0.528 | 25 | 28 |
| --             | chr3 | 140592293 | C  | A   | --     | --    | IGR             | SNP | 0.188 | 39 | 9  |
| --             | chr3 | 140711988 | A  | G   | --     | --    | IGR             | SNP | 0.281 | 23 | 9  |
| <i>SPSB4</i>   | chr3 | 140857997 | A  | G   | --     | --    | Intron          | SNP | 0.222 | 14 | 4  |
| <i>ZBTB38</i>  | chr3 | 141060484 | G  | C   | --     | --    | Intron          | SNP | 0.508 | 31 | 32 |
| --             | chr3 | 141181458 | A  | G   | --     | --    | IGR             | SNP | 0.105 | 68 | 8  |
| <i>TFDP2</i>   | chr3 | 141683645 | T  | A   | --     | --    | Intron          | SNP | 0.305 | 41 | 18 |
| <i>TFDP2</i>   | chr3 | 141683646 | C  | G   | --     | --    | Intron          | SNP | 0.328 | 41 | 20 |
| <i>XRN1</i>    | chr3 | 142041922 | G  | C   | --     | --    | Intron          | SNP | 0.389 | 33 | 21 |
| <i>ATR</i>     | chr3 | 142215143 | T  | C   | --     | --    | Intron          | SNP | 0.500 | 2  | 2  |
| <i>ATR</i>     | chr3 | 142277598 | G  | C   | C1753G | H585D | Missense_mutati | SNP | 0.511 | 22 | 23 |
| <i>PLS1</i>    | chr3 | 142423674 | TG | -   | --     | --    | Intron          | DEL | 0.105 | 17 | 2  |
| <i>U2SURP</i>  | chr3 | 142738549 | G  | A   | --     | --    | Intron          | SNP | 0.554 | 25 | 31 |
| <i>U2SURP</i>  | chr3 | 142764128 | G  | C   | --     | --    | Intron          | SNP | 0.154 | 44 | 8  |
| --             | chr3 | 142880387 | T  | C   | --     | --    | IGR             | SNP | 0.404 | 31 | 21 |
| --             | chr3 | 142937024 | C  | A   | --     | --    | IGR             | SNP | 0.245 | 37 | 12 |
| --             | chr3 | 142955515 | T  | C   | --     | --    | IGR             | SNP | 0.508 | 31 | 32 |
| <i>SLC9A9</i>  | chr3 | 143105831 | C  | T   | --     | --    | Intron          | SNP | 0.512 | 20 | 21 |
| <i>SLC9A9</i>  | chr3 | 143113172 | TA | -   | --     | --    | Intron          | DEL | 0.125 | 21 | 3  |
| <i>SLC9A9</i>  | chr3 | 143220696 | G  | T   | --     | --    | Intron          | SNP | 0.217 | 36 | 10 |
| <i>SLC9A9</i>  | chr3 | 143406315 | C  | T   | --     | --    | Intron          | SNP | 0.205 | 31 | 8  |
| <i>SLC9A9</i>  | chr3 | 143443479 | C  | G   | --     | --    | Intron          | SNP | 0.298 | 40 | 17 |
| <i>SLC9A9</i>  | chr3 | 143553741 | G  | A   | --     | --    | Intron          | SNP | 0.431 | 29 | 22 |
| --             | chr3 | 143615646 | G  | T   | --     | --    | IGR             | SNP | 0.200 | 32 | 8  |
| --             | chr3 | 143671333 | G  | T   | --     | --    | IGR             | SNP | 0.179 | 32 | 7  |
| <i>C3orf58</i> | chr3 | 143690142 | A  | C   | --     | --    | 5'Flank         | SNP | 0.333 | 8  | 4  |
| --             | chr3 | 143789876 | T  | G   | --     | --    | IGR             | SNP | 0.195 | 33 | 8  |
| --             | chr3 | 143879035 | A  | T   | --     | --    | IGR             | SNP | 0.145 | 47 | 8  |
| --             | chr3 | 144165641 | T  | G   | --     | --    | IGR             | SNP | 0.229 | 37 | 11 |
| --             | chr3 | 144165642 | G  | T   | --     | --    | IGR             | SNP | 0.213 | 37 | 10 |
| --             | chr3 | 144174292 | G  | A   | --     | --    | IGR             | SNP | 0.148 | 23 | 4  |
| --             | chr3 | 144479880 | T  | C   | --     | --    | IGR             | SNP | 0.286 | 40 | 16 |
| --             | chr3 | 144482728 | A  | G   | --     | --    | IGR             | SNP | 0.382 | 21 | 13 |
| --             | chr3 | 144580590 | C  | G   | --     | --    | IGR             | SNP | 0.463 | 22 | 19 |
| --             | chr3 | 144682379 | G  | C   | --     | --    | IGR             | SNP | 0.474 | 20 | 18 |
| --             | chr3 | 144682461 | G  | A   | --     | --    | IGR             | SNP | 0.489 | 23 | 22 |
| --             | chr3 | 144682940 | G  | C   | --     | --    | IGR             | SNP | 0.714 | 8  | 20 |
| --             | chr3 | 144688195 | -  | CAT | --     | --    | IGR             | INS | 0.148 | 46 | 8  |
| --             | chr3 | 144699418 | A  | T   | --     | --    | IGR             | SNP | 0.194 | 29 | 7  |
| --             | chr3 | 144800578 | C  | A   | --     | --    | IGR             | SNP | 0.500 | 16 | 16 |
| --             | chr3 | 144873755 | A  | G   | --     | --    | IGR             | SNP | 0.333 | 30 | 15 |
| --             | chr3 | 145026843 | -  | CA  | --     | --    | IGR             | INS | 0.434 | 30 | 23 |
| --             | chr3 | 145037874 | C  | T   | --     | --    | IGR             | SNP | 0.206 | 27 | 7  |
| --             | chr3 | 145037875 | T  | A   | --     | --    | IGR             | SNP | 0.200 | 28 | 7  |
| --             | chr3 | 145062030 | A  | T   | --     | --    | IGR             | SNP | 0.140 | 43 | 7  |
| --             | chr3 | 145067937 | A  | C   | --     | --    | IGR             | SNP | 0.449 | 27 | 22 |
| --             | chr3 | 145227245 | C  | G   | --     | --    | IGR             | SNP | 0.148 | 46 | 8  |
| --             | chr3 | 145429879 | C  | T   | --     | --    | IGR             | SNP | 0.240 | 38 | 12 |
| --             | chr3 | 145511167 | G  | A   | --     | --    | IGR             | SNP | 0.462 | 21 | 18 |
| --             | chr3 | 145511211 | G  | C   | --     | --    | IGR             | SNP | 0.444 | 30 | 24 |
| --             | chr3 | 145630830 | A  | T   | --     | --    | IGR             | SNP | 0.442 | 24 | 19 |
| <i>PLOD2</i>   | chr3 | 145877887 | T  | A   | --     | --    | Intron          | SNP | 0.237 | 45 | 14 |
| --             | chr3 | 145900160 | G  | A   | --     | --    | IGR             | SNP | 0.308 | 9  | 4  |
| --             | chr3 | 145972768 | TG | -   | --     | --    | IGR             | DEL | 0.200 | 16 | 4  |
| --             | chr3 | 146413351 | T  | C   | --     | --    | IGR             | SNP | 0.600 | 14 | 21 |
| --             | chr3 | 146494425 | T  | A   | --     | --    | IGR             | SNP | 0.102 | 44 | 5  |
| --             | chr3 | 146649837 | A  | G   | --     | --    | IGR             | SNP | 0.290 | 22 | 9  |
| --             | chr3 | 146845081 | T  | C   | --     | --    | IGR             | SNP | 0.207 | 23 | 6  |
| --             | chr3 | 146923021 | C  | T   | --     | --    | IGR             | SNP | 0.526 | 27 | 30 |
| --             | chr3 | 147058581 | T  | A   | --     | --    | IGR             | SNP | 0.204 | 39 | 10 |
| --             | chr3 | 147192132 | A  | C   | --     | --    | IGR             | SNP | 0.148 | 23 | 4  |
| --             | chr3 | 147363118 | T  | A   | --     | --    | IGR             | SNP | 0.179 | 32 | 7  |
| --             | chr3 | 147379082 | G  | T   | --     | --    | IGR             | SNP | 0.557 | 27 | 34 |
| --             | chr3 | 147504955 | T  | G   | --     | --    | IGR             | SNP | 0.296 | 19 | 8  |
| --             | chr3 | 147692936 | C  | A   | --     | --    | IGR             | SNP | 0.306 | 34 | 15 |
| --             | chr3 | 147735280 | G  | T   | --     | --    | IGR             | SNP | 0.509 | 27 | 28 |
| --             | chr3 | 148250054 | G  | C   | --     | --    | IGR             | SNP | 0.155 | 49 | 9  |
| --             | chr3 | 148654550 | A  | G   | --     | --    | IGR             | SNP | 0.395 | 26 | 17 |
| --             | chr3 | 148666508 | G  | C   | --     | --    | IGR             | SNP | 0.527 | 26 | 29 |
| <i>HPS3</i>    | chr3 | 148866385 | T  | G   | --     | --    | Intron          | SNP | 0.156 | 27 | 5  |
| --             | chr3 | 148961795 | A  | G   | --     | --    | IGR             | SNP | 0.250 | 36 | 12 |
| --             | chr3 | 149106727 | G  | C   | --     | --    | IGR             | SNP | 0.429 | 44 | 33 |
| --             | chr3 | 149106754 | G  | C   | --     | --    | IGR             | SNP | 0.457 | 51 | 43 |
| --             | chr3 | 149107036 | G  | A   | --     | --    | IGR             | SNP | 0.371 | 39 | 23 |
| --             | chr3 | 149107047 | G  | C   | --     | --    | IGR             | SNP | 0.377 | 38 | 23 |
| --             | chr3 | 149107088 | G  | A   | --     | --    | IGR             | SNP | 0.268 | 30 | 11 |
| --             | chr3 | 149107234 | C  | T   | --     | --    | IGR             | SNP | 0.507 | 33 | 34 |

|                     |      |           |     |    |    |    |        |     |       |    |    |
|---------------------|------|-----------|-----|----|----|----|--------|-----|-------|----|----|
| <i>RNF13</i>        | chr3 | 149581617 | G   | T  | -- | -- | Intron | SNP | 0.225 | 31 | 9  |
| --                  | chr3 | 149860475 | C   | A  | -- | -- | IGR    | SNP | 0.325 | 27 | 13 |
| --                  | chr3 | 150211796 | G   | T  | -- | -- | IGR    | SNP | 0.167 | 20 | 4  |
| <i>SELT</i>         | chr3 | 150321568 | GA  | -  | -- | -- | Intron | DEL | 0.500 | 35 | 35 |
| --                  | chr3 | 150514023 | T   | A  | -- | -- | IGR    | SNP | 0.220 | 39 | 11 |
| --                  | chr3 | 150514570 | T   | C  | -- | -- | IGR    | SNP | 0.148 | 23 | 4  |
| <i>MED12L</i>       | chr3 | 150891200 | A   | G  | -- | -- | Intron | SNP | 0.289 | 27 | 11 |
| <i>MED12L,P2R</i>   | chr3 | 150954855 | G   | T  | -- | -- | Intron | SNP | 0.190 | 17 | 4  |
| --                  | chr3 | 151206866 | G   | A  | -- | -- | IGR    | SNP | 0.333 | 26 | 13 |
| --                  | chr3 | 151250867 | T   | A  | -- | -- | IGR    | SNP | 0.257 | 26 | 9  |
| --                  | chr3 | 151620209 | G   | A  | -- | -- | IGR    | SNP | 0.205 | 35 | 9  |
| --                  | chr3 | 152637248 | A   | T  | -- | -- | IGR    | SNP | 0.148 | 46 | 8  |
| --                  | chr3 | 152736485 | G   | T  | -- | -- | IGR    | SNP | 0.190 | 17 | 4  |
| --                  | chr3 | 152773649 | -   | AG | -- | -- | IGR    | INS | 0.200 | 12 | 3  |
| --                  | chr3 | 152789028 | A   | G  | -- | -- | IGR    | SNP | 0.222 | 28 | 8  |
| --                  | chr3 | 152958582 | A   | G  | -- | -- | IGR    | SNP | 0.214 | 11 | 3  |
| --                  | chr3 | 153010537 | G   | A  | -- | -- | IGR    | SNP | 0.217 | 18 | 5  |
| --                  | chr3 | 153390314 | T   | C  | -- | -- | IGR    | SNP | 0.585 | 17 | 24 |
| <i>ARHGEF26-A</i>   | chr3 | 153786062 | G   | T  | -- | -- | RNA    | SNP | 0.108 | 33 | 4  |
| <i>GPR149</i>       | chr3 | 154070881 | C   | T  | -- | -- | Intron | SNP | 0.603 | 31 | 47 |
| --                  | chr3 | 154439220 | G   | A  | -- | -- | IGR    | SNP | 0.167 | 40 | 8  |
| --                  | chr3 | 154461091 | A   | C  | -- | -- | IGR    | SNP | 0.463 | 29 | 25 |
| --                  | chr3 | 154709980 | C   | T  | -- | -- | IGR    | SNP | 0.192 | 21 | 5  |
| --                  | chr3 | 154791835 | CCT | -  | -- | -- | IGR    | DEL | 0.106 | 42 | 5  |
| <i>MME</i>          | chr3 | 154798607 | G   | A  | -- | -- | Intron | SNP | 0.392 | 31 | 20 |
| --                  | chr3 | 154916075 | C   | T  | -- | -- | IGR    | SNP | 0.413 | 44 | 31 |
| --                  | chr3 | 154935983 | T   | C  | -- | -- | IGR    | SNP | 0.304 | 39 | 17 |
| --                  | chr3 | 155135119 | C   | T  | -- | -- | IGR    | SNP | 0.190 | 64 | 15 |
| <i>PLCH1</i>        | chr3 | 155330135 | AG  | -  | -- | -- | Intron | DEL | 0.121 | 29 | 4  |
| <i>C3orf33</i>      | chr3 | 155501689 | T   | G  | -- | -- | Intron | SNP | 0.423 | 15 | 11 |
| --                  | chr3 | 156302827 | G   | A  | -- | -- | IGR    | SNP | 0.377 | 43 | 26 |
| <i>LOC730091</i>    | chr3 | 156516980 | G   | A  | -- | -- | RNA    | SNP | 0.413 | 37 | 26 |
| <i>LEKR1</i>        | chr3 | 156617391 | G   | A  | -- | -- | Intron | SNP | 0.294 | 24 | 10 |
| <i>LEKR1</i>        | chr3 | 156664435 | C   | T  | -- | -- | Intron | SNP | 0.478 | 24 | 22 |
| --                  | chr3 | 156789957 | G   | A  | -- | -- | IGR    | SNP | 0.321 | 36 | 17 |
| --                  | chr3 | 156909996 | G   | A  | -- | -- | IGR    | SNP | 0.286 | 10 | 4  |
| --                  | chr3 | 156910000 | A   | G  | -- | -- | IGR    | SNP | 0.286 | 10 | 4  |
| <i>VEPH1</i>        | chr3 | 156991872 | G   | C  | -- | -- | Intron | SNP | 0.509 | 26 | 27 |
| <i>VEPH1</i>        | chr3 | 157067882 | G   | A  | -- | -- | Intron | SNP | 0.172 | 48 | 10 |
| --                  | chr3 | 157486891 | A   | T  | -- | -- | IGR    | SNP | 0.413 | 27 | 19 |
| --                  | chr3 | 157492613 | C   | T  | -- | -- | IGR    | SNP | 0.210 | 49 | 13 |
| --                  | chr3 | 157675136 | G   | A  | -- | -- | IGR    | SNP | 0.500 | 26 | 26 |
| <i>RSRC1</i>        | chr3 | 158032127 | C   | G  | -- | -- | Intron | SNP | 0.180 | 41 | 9  |
| <i>RSRC1</i>        | chr3 | 158106418 | G   | T  | -- | -- | Intron | SNP | 0.152 | 28 | 5  |
| <i>RSRC1</i>        | chr3 | 158184166 | G   | A  | -- | -- | Intron | SNP | 0.250 | 42 | 14 |
| --                  | chr3 | 158477842 | G   | A  | -- | -- | IGR    | SNP | 0.407 | 32 | 22 |
| <i>IQCJ,IQCJ-SC</i> | chr3 | 158840762 | G   | C  | -- | -- | Intron | SNP | 0.364 | 28 | 16 |
| <i>IQCJ,IQCJ-SC</i> | chr3 | 158873131 | G   | C  | -- | -- | Intron | SNP | 0.425 | 23 | 17 |
| <i>IQCJ-SCHIP1</i>  | chr3 | 159133577 | G   | A  | -- | -- | Intron | SNP | 0.391 | 28 | 18 |
| <i>IQCJ-SCHIP1</i>  | chr3 | 159145988 | T   | C  | -- | -- | Intron | SNP | 0.227 | 17 | 5  |
| <i>IQCJ-SCHIP1</i>  | chr3 | 159152840 | T   | A  | -- | -- | Intron | SNP | 0.169 | 59 | 12 |
| <i>IQCJ-SCHIP1</i>  | chr3 | 159278740 | T   | A  | -- | -- | Intron | SNP | 0.392 | 31 | 20 |
| <i>IFT80</i>        | chr3 | 160008212 | A   | G  | -- | -- | Intron | SNP | 0.179 | 23 | 5  |
| <i>IFT80</i>        | chr3 | 160008213 | G   | A  | -- | -- | Intron | SNP | 0.250 | 21 | 7  |
| <i>IFT80</i>        | chr3 | 160097783 | G   | C  | -- | -- | Intron | SNP | 0.217 | 36 | 10 |
| <i>SMC4</i>         | chr3 | 160130257 | G   | C  | -- | -- | Intron | SNP | 0.410 | 36 | 25 |
| --                  | chr3 | 160293115 | G   | C  | -- | -- | IGR    | SNP | 0.129 | 27 | 4  |
| --                  | chr3 | 160336834 | G   | C  | -- | -- | IGR    | SNP | 0.489 | 24 | 23 |
| --                  | chr3 | 160414813 | T   | C  | -- | -- | IGR    | SNP | 0.283 | 33 | 13 |
| <i>PPM1L</i>        | chr3 | 160495089 | A   | G  | -- | -- | Intron | SNP | 0.153 | 50 | 9  |
| <i>PPM1L</i>        | chr3 | 160532265 | TAC | -  | -- | -- | Intron | DEL | 0.103 | 70 | 8  |
| <i>PPM1L</i>        | chr3 | 160572714 | C   | A  | -- | -- | Intron | SNP | 0.152 | 28 | 5  |
| <i>PPM1L</i>        | chr3 | 160672751 | TTC | -  | -- | -- | Intron | DEL | 0.130 | 20 | 3  |
| --                  | chr3 | 160916271 | G   | A  | -- | -- | IGR    | SNP | 0.536 | 26 | 30 |
| --                  | chr3 | 161104047 | G   | C  | -- | -- | IGR    | SNP | 0.488 | 21 | 20 |
| --                  | chr3 | 161104076 | G   | C  | -- | -- | IGR    | SNP | 0.391 | 28 | 18 |
| --                  | chr3 | 161104142 | G   | C  | -- | -- | IGR    | SNP | 0.377 | 38 | 23 |
| --                  | chr3 | 161147882 | T   | C  | -- | -- | IGR    | SNP | 0.121 | 29 | 4  |
| --                  | chr3 | 161196101 | G   | A  | -- | -- | IGR    | SNP | 0.455 | 30 | 25 |
| --                  | chr3 | 161298241 | C   | T  | -- | -- | IGR    | SNP | 0.447 | 26 | 21 |
| --                  | chr3 | 161327873 | C   | T  | -- | -- | IGR    | SNP | 0.536 | 13 | 15 |
| --                  | chr3 | 161457652 | C   | A  | -- | -- | IGR    | SNP | 0.525 | 28 | 31 |
| --                  | chr3 | 161503763 | C   | A  | -- | -- | IGR    | SNP | 0.244 | 31 | 10 |
| --                  | chr3 | 161700658 | A   | T  | -- | -- | IGR    | SNP | 0.194 | 58 | 14 |
| --                  | chr3 | 161932191 | T   | A  | -- | -- | IGR    | SNP | 0.182 | 18 | 4  |
| --                  | chr3 | 162051701 | G   | T  | -- | -- | IGR    | SNP | 0.500 | 18 | 18 |
| --                  | chr3 | 162154152 | G   | A  | -- | -- | IGR    | SNP | 0.447 | 26 | 21 |
| --                  | chr3 | 162315576 | A   | G  | -- | -- | IGR    | SNP | 0.218 | 43 | 12 |
| --                  | chr3 | 162549737 | C   | A  | -- | -- | IGR    | SNP | 0.455 | 6  | 5  |
| --                  | chr3 | 162549745 | A   | G  | -- | -- | IGR    | SNP | 0.385 | 8  | 5  |

|           |      |           |       |     |       |       |                 |     |       |    |    |
|-----------|------|-----------|-------|-----|-------|-------|-----------------|-----|-------|----|----|
| LOC647107 | chr3 | 162946018 | G     | T   | --    | --    | RNA             | SNP | 0.243 | 28 | 9  |
| --        | chr3 | 163047029 | C     | A   | --    | --    | IGR             | SNP | 0.154 | 44 | 8  |
| --        | chr3 | 163093104 | A     | G   | --    | --    | IGR             | SNP | 0.324 | 23 | 11 |
| --        | chr3 | 163152707 | G     | C   | --    | --    | IGR             | SNP | 0.107 | 25 | 3  |
| --        | chr3 | 163236951 | A     | G   | --    | --    | IGR             | SNP | 0.107 | 75 | 9  |
| --        | chr3 | 163236952 | G     | T   | --    | --    | IGR             | SNP | 0.107 | 75 | 9  |
| --        | chr3 | 163272032 | A     | T   | --    | --    | IGR             | SNP | 0.351 | 24 | 13 |
| --        | chr3 | 163274996 | C     | A   | --    | --    | IGR             | SNP | 0.578 | 19 | 26 |
| --        | chr3 | 163311024 | G     | C   | --    | --    | IGR             | SNP | 0.435 | 26 | 20 |
| --        | chr3 | 163376323 | C     | T   | --    | --    | IGR             | SNP | 0.463 | 36 | 31 |
| --        | chr3 | 163430714 | C     | T   | --    | --    | IGR             | SNP | 0.513 | 19 | 20 |
| --        | chr3 | 163493811 | A     | C   | --    | --    | IGR             | SNP | 0.415 | 24 | 17 |
| --        | chr3 | 163558178 | G     | T   | --    | --    | IGR             | SNP | 0.482 | 29 | 27 |
| --        | chr3 | 163876264 | G     | T   | --    | --    | IGR             | SNP | 0.500 | 19 | 19 |
| --        | chr3 | 164045180 | -     | GTA | --    | --    | IGR             | INS | 0.138 | 25 | 4  |
| --        | chr3 | 164081320 | ACACC | -   | --    | --    | IGR             | DEL | 0.114 | 39 | 5  |
| --        | chr3 | 164081968 | G     | A   | --    | --    | IGR             | SNP | 0.421 | 33 | 24 |
| --        | chr3 | 164113407 | T     | C   | --    | --    | IGR             | SNP | 0.229 | 27 | 8  |
| --        | chr3 | 164146181 | C     | T   | --    | --    | IGR             | SNP | 0.333 | 14 | 7  |
| --        | chr3 | 164299180 | G     | T   | --    | --    | IGR             | SNP | 0.189 | 30 | 7  |
| --        | chr3 | 164431016 | G     | A   | --    | --    | IGR             | SNP | 0.188 | 39 | 9  |
| --        | chr3 | 164548389 | A     | T   | --    | --    | IGR             | SNP | 0.200 | 16 | 4  |
| --        | chr3 | 164666892 | G     | C   | --    | --    | IGR             | SNP | 0.295 | 31 | 13 |
| SI        | chr3 | 164787838 | GAC   | -   | --    | --    | Intron          | DEL | 0.176 | 14 | 3  |
| --        | chr3 | 165308503 | C     | T   | --    | --    | IGR             | SNP | 0.400 | 6  | 4  |
| --        | chr3 | 165308517 | A     | G   | --    | --    | IGR             | SNP | 0.308 | 9  | 4  |
| --        | chr3 | 165341770 | C     | T   | --    | --    | IGR             | SNP | 0.463 | 22 | 19 |
| BCHE      | chr3 | 165518056 | T     | C   | --    | --    | Intron          | SNP | 0.357 | 18 | 10 |
| BCHE      | chr3 | 165549241 | A     | G   | --    | --    | Intron          | SNP | 0.447 | 21 | 17 |
| --        | chr3 | 165573121 | T     | C   | --    | --    | IGR             | SNP | 0.245 | 37 | 12 |
| --        | chr3 | 165604869 | AAT   | -   | --    | --    | IGR             | DEL | 0.111 | 24 | 3  |
| --        | chr3 | 165981005 | A     | T   | --    | --    | IGR             | SNP | 0.122 | 43 | 6  |
| --        | chr3 | 166116597 | A     | C   | --    | --    | IGR             | SNP | 0.634 | 15 | 26 |
| --        | chr3 | 166159176 | G     | T   | --    | --    | IGR             | SNP | 0.245 | 40 | 13 |
| --        | chr3 | 166282846 | A     | C   | --    | --    | IGR             | SNP | 0.184 | 40 | 9  |
| --        | chr3 | 166551344 | C     | A   | --    | --    | IGR             | SNP | 0.133 | 26 | 4  |
| --        | chr3 | 166644821 | -     | CCT | --    | --    | IGR             | INS | 0.106 | 58 | 7  |
| --        | chr3 | 167125854 | G     | T   | --    | --    | IGR             | SNP | 0.411 | 33 | 23 |
| WDR49     | chr3 | 167288447 | A     | G   | --    | --    | Intron          | SNP | 0.186 | 35 | 8  |
| WDR49     | chr3 | 167355757 | T     | A   | --    | --    | Intron          | SNP | 0.569 | 22 | 29 |
| WDR49     | chr3 | 167367221 | C     | A   | --    | --    | Intron          | SNP | 0.107 | 67 | 8  |
| PDCD10    | chr3 | 167413780 | A     | C   | --    | --    | Intron          | SNP | 0.243 | 28 | 9  |
| PDCD10    | chr3 | 167443927 | G     | T   | --    | --    | Intron          | SNP | 0.190 | 17 | 4  |
| --        | chr3 | 167697501 | T     | A   | --    | --    | IGR             | SNP | 0.273 | 16 | 6  |
| EGFEM1P   | chr3 | 168127362 | A     | T   | --    | --    | RNA             | SNP | 0.378 | 23 | 14 |
| EGFEM1P   | chr3 | 168174064 | C     | T   | --    | --    | RNA             | SNP | 0.581 | 26 | 36 |
| EGFEM1P   | chr3 | 168353819 | A     | T   | --    | --    | RNA             | SNP | 0.508 | 30 | 31 |
| EGFEM1P   | chr3 | 168487777 | C     | G   | --    | --    | RNA             | SNP | 0.208 | 19 | 5  |
| --        | chr3 | 168679068 | G     | T   | --    | --    | IGR             | SNP | 0.111 | 32 | 4  |
| --        | chr3 | 168695232 | C     | A   | --    | --    | IGR             | SNP | 0.281 | 41 | 16 |
| MECOM     | chr3 | 168817411 | G     | T   | --    | --    | Intron          | SNP | 0.424 | 19 | 14 |
| MECOM     | chr3 | 168890236 | C     | T   | --    | --    | Intron          | SNP | 0.133 | 26 | 4  |
| MECOM     | chr3 | 168901605 | C     | T   | --    | --    | Intron          | SNP | 0.200 | 12 | 3  |
| MECOM     | chr3 | 168937606 | -     | GTA | --    | --    | Intron          | INS | 0.273 | 16 | 6  |
| MECOM     | chr3 | 169098996 | T     | A   | A354T | K118N | Missense_mutati | SNP | 0.203 | 47 | 12 |
| MECOM     | chr3 | 169122202 | A     | T   | --    | --    | Intron          | SNP | 0.211 | 30 | 8  |
| MECOM     | chr3 | 169346926 | G     | T   | --    | --    | Intron          | SNP | 0.143 | 24 | 4  |
| --        | chr3 | 169397904 | G     | A   | --    | --    | IGR             | SNP | 0.444 | 5  | 4  |
| --        | chr3 | 169438118 | G     | T   | --    | --    | IGR             | SNP | 0.108 | 33 | 4  |
| LRR34     | chr3 | 169524329 | G     | A   | --    | --    | Intron          | SNP | 0.528 | 25 | 28 |
| --        | chr3 | 169738892 | G     | A   | --    | --    | IGR             | SNP | 0.167 | 20 | 4  |
| --        | chr3 | 169920347 | C     | A   | --    | --    | IGR             | SNP | 0.127 | 48 | 7  |
| --        | chr3 | 170027318 | C     | T   | --    | --    | IGR             | SNP | 0.286 | 15 | 6  |
| --        | chr3 | 170060764 | G     | A   | --    | --    | IGR             | SNP | 0.418 | 32 | 23 |
| SKIL      | chr3 | 170090794 | G     | T   | --    | --    | Intron          | SNP | 0.222 | 14 | 4  |
| SKIL      | chr3 | 170108559 | C     | T   | --    | --    | Intron          | SNP | 0.500 | 25 | 25 |
| SLC7A14   | chr3 | 170269187 | A     | G   | --    | --    | Intron          | SNP | 0.107 | 50 | 6  |
| SLC7A14   | chr3 | 170269188 | G     | T   | --    | --    | Intron          | SNP | 0.125 | 49 | 7  |
| --        | chr3 | 170509249 | G     | A   | --    | --    | IGR             | SNP | 0.478 | 24 | 22 |
| --        | chr3 | 170539890 | C     | T   | --    | --    | IGR             | SNP | 0.100 | 27 | 3  |
| --        | chr3 | 170702729 | G     | C   | --    | --    | IGR             | SNP | 0.410 | 23 | 16 |
| TNIK      | chr3 | 170849164 | G     | A   | --    | --    | Intron          | SNP | 0.250 | 12 | 4  |
| TNIK      | chr3 | 170878703 | G     | A   | --    | --    | Intron          | SNP | 0.241 | 44 | 14 |
| PLD1      | chr3 | 171453797 | G     | A   | --    | --    | Intron          | SNP | 0.493 | 34 | 33 |
| --        | chr3 | 171677068 | G     | A   | --    | --    | IGR             | SNP | 0.337 | 61 | 31 |
| --        | chr3 | 171756252 | T     | A   | --    | --    | IGR             | SNP | 0.149 | 40 | 7  |
| FNDC3B    | chr3 | 171932555 | G     | C   | --    | --    | Intron          | SNP | 0.453 | 29 | 24 |
| FNDC3B    | chr3 | 171932862 | G     | C   | --    | --    | Intron          | SNP | 0.440 | 42 | 33 |
| FNDC3B    | chr3 | 172008243 | T     | A   | --    | --    | Intron          | SNP | 0.103 | 35 | 4  |
| --        | chr3 | 172244723 | G     | T   | --    | --    | IGR             | SNP | 0.182 | 18 | 4  |

|          |      |           |     |        |              |            |                 |     |       |    |    |
|----------|------|-----------|-----|--------|--------------|------------|-----------------|-----|-------|----|----|
| --       | chr3 | 172341206 | G   | C      | --           | --         | IGR             | SNP | 0.348 | 30 | 16 |
| NCEH1    | chr3 | 172420099 | C   | G      | --           | --         | Intron          | SNP | 0.404 | 34 | 23 |
| NCEH1    | chr3 | 172420212 | G   | A      | --           | --         | Intron          | SNP | 0.339 | 39 | 20 |
| NCEH1    | chr3 | 172420478 | G   | C      | --           | --         | Intron          | SNP | 0.408 | 29 | 20 |
| --       | chr3 | 172584066 | TC  | -      | --           | --         | IGR             | DEL | 0.450 | 33 | 27 |
| SPATA16  | chr3 | 172643172 | TC  | -      | 1191_1192del | 397_398del | Frame_Shift_Del | DEL | 0.250 | 27 | 9  |
| SPATA16  | chr3 | 172763399 | T   | C      | --           | --         | Intron          | SNP | 0.293 | 41 | 17 |
| --       | chr3 | 172947084 | C   | G      | --           | --         | IGR             | SNP | 0.523 | 21 | 23 |
| NLGN1    | chr3 | 173130566 | C   | G      | --           | --         | Intron          | SNP | 0.308 | 45 | 20 |
| NLGN1    | chr3 | 173208123 | C   | T      | --           | --         | Intron          | SNP | 0.250 | 9  | 3  |
| NLGN1    | chr3 | 173208151 | C   | T      | --           | --         | Intron          | SNP | 0.158 | 16 | 3  |
| NLGN1    | chr3 | 173210018 | G   | A      | --           | --         | Intron          | SNP | 0.267 | 33 | 12 |
| NLGN1    | chr3 | 173210044 | A   | T      | --           | --         | Intron          | SNP | 0.196 | 41 | 10 |
| NLGN1    | chr3 | 173291852 | C   | A      | --           | --         | Intron          | SNP | 0.286 | 15 | 6  |
| NLGN1    | chr3 | 173402038 | A   | G      | --           | --         | Intron          | SNP | 0.479 | 25 | 23 |
| NLGN1    | chr3 | 173427592 | T   | A      | --           | --         | Intron          | SNP | 0.182 | 18 | 4  |
| NLGN1    | chr3 | 173485370 | A   | T      | --           | --         | Intron          | SNP | 0.385 | 16 | 10 |
| NLGN1    | chr3 | 173658293 | T   | C      | --           | --         | Intron          | SNP | 0.558 | 19 | 24 |
| NLGN1    | chr3 | 173784356 | G   | C      | --           | --         | Intron          | SNP | 0.208 | 19 | 5  |
| NLGN1    | chr3 | 173831697 | C   | T      | --           | --         | Intron          | SNP | 0.524 | 20 | 22 |
| --       | chr3 | 174148836 | -   | GT     | --           | --         | IGR             | INS | 0.305 | 57 | 25 |
| --       | chr3 | 174202672 | A   | G      | --           | --         | IGR             | SNP | 0.132 | 33 | 5  |
| --       | chr3 | 174499408 | A   | T      | --           | --         | IGR             | SNP | 0.167 | 45 | 9  |
| --       | chr3 | 174543297 | C   | T      | --           | --         | IGR             | SNP | 0.152 | 56 | 10 |
| NAALADL2 | chr3 | 174804497 | T   | G      | --           | --         | Intron          | SNP | 0.449 | 27 | 22 |
| NAALADL2 | chr3 | 174948727 | A   | G      | --           | --         | Intron          | SNP | 0.220 | 32 | 9  |
| NAALADL2 | chr3 | 175182697 | G   | T      | --           | --         | Intron          | SNP | 0.395 | 26 | 17 |
| NAALADL2 | chr3 | 175197033 | C   | G      | --           | --         | Intron          | SNP | 0.537 | 19 | 22 |
| NAALADL2 | chr3 | 175296165 | G   | A      | --           | --         | Intron          | SNP | 0.360 | 32 | 18 |
| NAALADL2 | chr3 | 175325368 | T   | C      | --           | --         | Intron          | SNP | 0.203 | 47 | 12 |
| NAALADL2 | chr3 | 175503793 | -   | TTTTTC | --           | --         | Intron          | INS | 0.286 | 14 | 6  |
| --       | chr3 | 175718741 | G   | A      | --           | --         | IGR             | SNP | 0.182 | 27 | 6  |
| --       | chr3 | 175831202 | T   | A      | --           | --         | IGR             | SNP | 0.464 | 15 | 13 |
| --       | chr3 | 176096865 | G   | C      | --           | --         | IGR             | SNP | 0.415 | 31 | 22 |
| --       | chr3 | 176296702 | G   | A      | --           | --         | IGR             | SNP | 0.415 | 38 | 27 |
| --       | chr3 | 176428438 | C   | T      | --           | --         | IGR             | SNP | 0.308 | 9  | 4  |
| --       | chr3 | 176521344 | G   | T      | --           | --         | IGR             | SNP | 0.462 | 28 | 24 |
| TBL1XR1  | chr3 | 176890561 | G   | C      | --           | --         | Intron          | SNP | 0.275 | 29 | 11 |
| --       | chr3 | 176995067 | A   | G      | --           | --         | IGR             | SNP | 0.259 | 20 | 7  |
| --       | chr3 | 177002427 | A   | G      | --           | --         | IGR             | SNP | 0.466 | 31 | 27 |
| --       | chr3 | 177035896 | G   | T      | --           | --         | IGR             | SNP | 0.250 | 9  | 3  |
| --       | chr3 | 177064716 | -   | TA     | --           | --         | IGR             | INS | 0.158 | 16 | 3  |
| --       | chr3 | 177181326 | C   | A      | --           | --         | IGR             | SNP | 0.150 | 51 | 9  |
| --       | chr3 | 177181327 | A   | C      | --           | --         | IGR             | SNP | 0.150 | 51 | 9  |
| --       | chr3 | 177778608 | A   | C      | --           | --         | IGR             | SNP | 0.433 | 34 | 26 |
| --       | chr3 | 178008642 | T   | C      | --           | --         | IGR             | SNP | 0.102 | 53 | 6  |
| --       | chr3 | 178161944 | C   | G      | --           | --         | IGR             | SNP | 0.164 | 46 | 9  |
| --       | chr3 | 178718571 | G   | A      | --           | --         | IGR             | SNP | 0.452 | 34 | 28 |
| --       | chr3 | 179030430 | -   | ATTC   | --           | --         | IGR             | INS | 0.205 | 31 | 8  |
| GNB4     | chr3 | 179162228 | A   | T      | --           | --         | Intron          | SNP | 0.103 | 26 | 3  |
| PEX5L    | chr3 | 179627626 | C   | A      | --           | --         | Intron          | SNP | 0.434 | 30 | 23 |
| --       | chr3 | 179855880 | A   | G      | --           | --         | IGR             | SNP | 0.280 | 36 | 14 |
| --       | chr3 | 179965905 | G   | T      | --           | --         | IGR             | SNP | 0.148 | 23 | 4  |
| CCDC39   | chr3 | 180394543 | T   | C      | --           | --         | Intron          | SNP | 0.583 | 5  | 7  |
| --       | chr3 | 180426226 | G   | C      | --           | --         | IGR             | SNP | 0.373 | 32 | 19 |
| --       | chr3 | 180496042 | G   | A      | --           | --         | IGR             | SNP | 0.183 | 49 | 11 |
| --       | chr3 | 180856861 | G   | T      | --           | --         | IGR             | SNP | 0.214 | 33 | 9  |
| --       | chr3 | 181033714 | C   | T      | --           | --         | IGR             | SNP | 0.588 | 14 | 20 |
| --       | chr3 | 181060375 | G   | C      | --           | --         | IGR             | SNP | 0.243 | 28 | 9  |
| --       | chr3 | 181108454 | G   | T      | --           | --         | IGR             | SNP | 0.170 | 44 | 9  |
| --       | chr3 | 181494044 | G   | A      | --           | --         | IGR             | SNP | 0.275 | 29 | 11 |
| --       | chr3 | 181541949 | C   | T      | --           | --         | IGR             | SNP | 0.250 | 36 | 12 |
| --       | chr3 | 181732729 | G   | A      | --           | --         | IGR             | SNP | 0.455 | 12 | 10 |
| --       | chr3 | 181807766 | A   | G      | --           | --         | IGR             | SNP | 0.154 | 33 | 6  |
| --       | chr3 | 182386149 | G   | A      | --           | --         | IGR             | SNP | 0.235 | 13 | 4  |
| MCF2L2   | chr3 | 182952498 | A   | T      | --           | --         | Intron          | SNP | 0.250 | 12 | 4  |
| --       | chr3 | 183277293 | C   | A      | --           | --         | IGR             | SNP | 0.250 | 12 | 4  |
| --       | chr3 | 183305802 | C   | A      | --           | --         | IGR             | SNP | 0.250 | 12 | 4  |
| --       | chr3 | 183323946 | CAG | -      | --           | --         | IGR             | DEL | 0.522 | 22 | 24 |
| ECE2     | chr3 | 183974468 | C   | T      | --           | --         | Intron          | SNP | 0.143 | 36 | 6  |
| --       | chr3 | 184354026 | G   | A      | --           | --         | IGR             | SNP | 0.260 | 54 | 19 |
| --       | chr3 | 184513849 | G   | A      | --           | --         | IGR             | SNP | 0.152 | 28 | 5  |
| VPS8     | chr3 | 184711153 | T   | G      | --           | --         | Intron          | SNP | 0.250 | 30 | 10 |
| VPS8     | chr3 | 184729396 | G   | C      | --           | --         | Intron          | SNP | 0.415 | 31 | 22 |
| TMEM41A  | chr3 | 185216073 | T   | A      | --           | --         | Intron          | SNP | 0.225 | 31 | 9  |
| LIPH     | chr3 | 185258642 | C   | G      | --           | --         | Intron          | SNP | 0.463 | 22 | 19 |
| --       | chr3 | 185294942 | A   | G      | --           | --         | IGR             | SNP | 0.200 | 16 | 4  |
| SENP2    | chr3 | 185325134 | G   | T      | --           | --         | Intron          | SNP | 0.235 | 13 | 4  |
| --       | chr3 | 185607035 | G   | C      | --           | --         | IGR             | SNP | 0.535 | 20 | 23 |
| TRA2B    | chr3 | 185642374 | G   | A      | --           | --         | Intron          | SNP | 0.436 | 31 | 24 |

|             |      |           |             |       |                         |       |                 |     |       |    |    |
|-------------|------|-----------|-------------|-------|-------------------------|-------|-----------------|-----|-------|----|----|
| DGKG        | chr3 | 186025690 | A           | T     | --                      | --    | Intron          | SNP | 0.176 | 28 | 6  |
| --          | chr3 | 186310933 | G           | C     | --                      | --    | IGR             | SNP | 0.467 | 24 | 21 |
| --          | chr3 | 186324208 | C           | T     | --                      | --    | IGR             | SNP | 0.250 | 45 | 15 |
| --          | chr3 | 186381023 | T           | C     | --                      | --    | IGR             | SNP | 0.190 | 17 | 4  |
| --          | chr3 | 186402370 | A           | T     | --                      | --    | IGR             | SNP | 0.244 | 34 | 11 |
| RFC4        | chr3 | 186508008 | C           | G     | G919C                   | V307L | Missense_mutati | SNP | 0.101 | 62 | 7  |
| --          | chr3 | 186531396 | G           | A     | --                      | --    | IGR             | SNP | 0.143 | 24 | 4  |
| ST6GAL1     | chr3 | 186665329 | T           | A     | --                      | --    | Intron          | SNP | 0.476 | 22 | 20 |
| MASP1       | chr3 | 186980725 | A           | C     | --                      | --    | Intron          | SNP | 0.420 | 29 | 21 |
| --          | chr3 | 187082066 | AAAAC       | -     | --                      | --    | IGR             | DEL | 0.278 | 26 | 10 |
| --          | chr3 | 187345970 | A           | T     | --                      | --    | IGR             | SNP | 0.133 | 39 | 6  |
| --          | chr3 | 187574431 | C           | A     | --                      | --    | IGR             | SNP | 0.159 | 37 | 7  |
| --          | chr3 | 187861257 | CCTGGCCAAI- | -     | --                      | --    | IGR             | DEL | 0.121 | 51 | 7  |
| LPP         | chr3 | 187918053 | C           | T     | --                      | --    | Intron          | SNP | 0.200 | 16 | 4  |
| LPP         | chr3 | 187994808 | C           | G     | --                      | --    | Intron          | SNP | 0.414 | 34 | 24 |
| LPP         | chr3 | 188058844 | TA          | -     | --                      | --    | Intron          | DEL | 0.364 | 28 | 16 |
| LPP         | chr3 | 188068618 | G           | A     | --                      | --    | Intron          | SNP | 0.190 | 51 | 12 |
| LPP         | chr3 | 188348213 | A           | G     | --                      | --    | Intron          | SNP | 0.160 | 42 | 8  |
| LPP         | chr3 | 188370922 | A           | T     | --                      | --    | Intron          | SNP | 0.550 | 27 | 33 |
| LPP         | chr3 | 188489355 | G           | A     | --                      | --    | Intron          | SNP | 0.143 | 24 | 4  |
| LPP         | chr3 | 188542290 | G           | C     | --                      | --    | Intron          | SNP | 0.439 | 32 | 25 |
| --          | chr3 | 188803715 | G           | A     | --                      | --    | IGR             | SNP | 0.217 | 47 | 13 |
| --          | chr3 | 189223941 | C           | T     | --                      | --    | IGR             | SNP | 0.357 | 18 | 10 |
| --          | chr3 | 189328367 | T           | C     | --                      | --    | IGR             | SNP | 0.204 | 43 | 11 |
| --          | chr3 | 189636737 | -           | TTA   | --                      | --    | IGR             | INS | 0.357 | 18 | 10 |
| LEPREL1     | chr3 | 189744158 | C           | T     | --                      | --    | Intron          | SNP | 0.532 | 22 | 25 |
| --          | chr3 | 189866780 | G           | A     | --                      | --    | IGR             | SNP | 0.160 | 21 | 4  |
| --          | chr3 | 189866799 | T           | C     | --                      | --    | IGR             | SNP | 0.121 | 29 | 4  |
| --          | chr3 | 189876940 | A           | T     | --                      | --    | IGR             | SNP | 0.462 | 21 | 18 |
| --          | chr3 | 190102629 | G           | C     | --                      | --    | IGR             | SNP | 0.143 | 42 | 7  |
| IL1RAP      | chr3 | 190237384 | C           | T     | --                      | --    | Intron          | SNP | 0.190 | 34 | 8  |
| IL1RAP      | chr3 | 190250070 | G           | T     | --                      | --    | Intron          | SNP | 0.133 | 26 | 4  |
| --          | chr3 | 190529543 | A           | G     | --                      | --    | IGR             | SNP | 0.121 | 58 | 8  |
| OSTN        | chr3 | 190962789 | G           | A     | --                      | --    | Intron          | SNP | 0.533 | 14 | 16 |
| CCDC50      | chr3 | 191098493 | G           | A     | G1110A,G582,M370I,M194I |       | Missense_mutati | SNP | 0.493 | 34 | 33 |
| --          | chr3 | 191407308 | A           | G     | --                      | --    | IGR             | SNP | 0.378 | 23 | 14 |
| --          | chr3 | 191427085 | G           | C     | --                      | --    | IGR             | SNP | 0.514 | 17 | 18 |
| --          | chr3 | 191574181 | C           | G     | --                      | --    | IGR             | SNP | 0.211 | 45 | 12 |
| --          | chr3 | 191756115 | T           | C     | --                      | --    | IGR             | SNP | 0.492 | 30 | 29 |
| --          | chr3 | 191788838 | C           | G     | --                      | --    | IGR             | SNP | 0.368 | 24 | 14 |
| FGF12       | chr3 | 191934726 | A           | G     | --                      | --    | Intron          | SNP | 0.408 | 29 | 20 |
| FGF12       | chr3 | 192292751 | C           | A     | --                      | --    | Intron          | SNP | 0.434 | 30 | 23 |
| FGF12       | chr3 | 192309382 | C           | T     | --                      | --    | Intron          | SNP | 0.100 | 54 | 6  |
| FGF12       | chr3 | 192429846 | A           | G     | --                      | --    | Intron          | SNP | 0.176 | 28 | 6  |
| HRASLS      | chr3 | 192966134 | G           | C     | --                      | --    | Intron          | SNP | 0.431 | 29 | 22 |
| ATP13A4     | chr3 | 193213859 | G           | T     | --                      | --    | Intron          | SNP | 0.500 | 18 | 18 |
| OPA1        | chr3 | 193322980 | G           | A     | --                      | --    | Intron          | SNP | 0.483 | 31 | 29 |
| OPA1        | chr3 | 193323273 | G           | C     | --                      | --    | Intron          | SNP | 0.451 | 28 | 23 |
| --          | chr3 | 193457597 | G           | A     | --                      | --    | IGR             | SNP | 0.319 | 47 | 22 |
| --          | chr3 | 193521781 | G           | A     | --                      | --    | IGR             | SNP | 0.432 | 21 | 16 |
| --          | chr3 | 193638217 | G           | T     | --                      | --    | IGR             | SNP | 0.174 | 19 | 4  |
| --          | chr3 | 194224435 | A           | C     | --                      | --    | IGR             | SNP | 0.325 | 27 | 13 |
| LSG1        | chr3 | 194383993 | C           | T     | --                      | --    | Intron          | SNP | 0.123 | 50 | 7  |
| LOC10050735 | chr3 | 194479441 | G           | A     | --                      | --    | RNA             | SNP | 0.479 | 38 | 35 |
| --          | chr3 | 194566891 | AATG        | -     | --                      | --    | IGR             | DEL | 0.106 | 59 | 7  |
| C3orf21     | chr3 | 194870546 | G           | C     | --                      | --    | Intron          | SNP | 0.478 | 24 | 22 |
| --          | chr3 | 195185247 | T           | A     | --                      | --    | IGR             | SNP | 0.255 | 35 | 12 |
| --          | chr3 | 195218683 | A           | T     | --                      | --    | IGR             | SNP | 0.125 | 21 | 3  |
| --          | chr3 | 195220660 | T           | C     | --                      | --    | IGR             | SNP | 0.146 | 35 | 6  |
| --          | chr3 | 195225454 | C           | T     | --                      | --    | IGR             | SNP | 0.220 | 46 | 13 |
| --          | chr3 | 195226647 | G           | C     | --                      | --    | IGR             | SNP | 0.100 | 36 | 4  |
| --          | chr3 | 195230634 | T           | A     | --                      | --    | IGR             | SNP | 0.121 | 51 | 7  |
| --          | chr3 | 195345789 | G           | A     | --                      | --    | IGR             | SNP | 0.149 | 40 | 7  |
| --          | chr3 | 195372628 | A           | G     | --                      | --    | IGR             | SNP | 0.123 | 71 | 10 |
| --          | chr3 | 195546008 | T           | G     | --                      | --    | IGR             | SNP | 0.179 | 23 | 5  |
| TNK2        | chr3 | 195607597 | A           | C     | --                      | --    | Intron          | SNP | 0.160 | 21 | 4  |
| SDHAP1      | chr3 | 195688999 | G           | A     | --                      | --    | RNA             | SNP | 0.111 | 40 | 5  |
| --          | chr3 | 195825760 | G           | A     | --                      | --    | IGR             | SNP | 0.636 | 4  | 7  |
| --          | chr3 | 195825763 | A           | G     | --                      | --    | IGR             | SNP | 0.545 | 5  | 6  |
| --          | chr3 | 195826014 | G           | T     | --                      | --    | IGR             | SNP | 0.667 | 3  | 6  |
| PCYT1A      | chr3 | 195985173 | G           | A     | --                      | --    | Intron          | SNP | 0.156 | 27 | 5  |
| TM4SF19-TC  | chr3 | 196051802 | -           | GGAAA | --                      | --    | RNA             | INS | 0.429 | 36 | 27 |
| UBXN7       | chr3 | 196080358 | TC          | -     | --                      | --    | 3'Flank         | DEL | 0.125 | 35 | 5  |
| --          | chr3 | 196189482 | T           | C     | --                      | --    | IGR             | SNP | 0.123 | 50 | 7  |
| --          | chr3 | 196194096 | C           | T     | --                      | --    | IGR             | SNP | 0.367 | 19 | 11 |
| C3orf43     | chr3 | 196238620 | G           | A     | --                      | --    | Intron          | SNP | 0.200 | 24 | 6  |
| --          | chr3 | 196430347 | T           | G     | --                      | --    | IGR             | SNP | 0.153 | 50 | 9  |
| PIGX        | chr3 | 196462462 | G           | A     | --                      | --    | 3'UTR           | SNP | 0.492 | 33 | 32 |
| SENP5       | chr3 | 196633455 | G           | A     | --                      | --    | Intron          | SNP | 0.398 | 50 | 33 |
| --          | chr3 | 196759453 | G           | C     | --                      | --    | IGR             | SNP | 0.182 | 27 | 6  |

|             |      |           |        |   |    |    |         |     |       |    |    |
|-------------|------|-----------|--------|---|----|----|---------|-----|-------|----|----|
| --          | chr3 | 196759458 | C      | T | -- | -- | IGR     | SNP | 0.194 | 25 | 6  |
| --          | chr3 | 196761619 | A      | T | -- | -- | IGR     | SNP | 0.157 | 86 | 16 |
| --          | chr3 | 197040169 | G      | T | -- | -- | IGR     | SNP | 0.121 | 29 | 4  |
| --          | chr3 | 197228015 | G      | T | -- | -- | IGR     | SNP | 0.681 | 15 | 32 |
| --          | chr3 | 197359789 | G      | A | -- | -- | IGR     | SNP | 0.100 | 36 | 4  |
| --          | chr3 | 197365066 | C      | T | -- | -- | IGR     | SNP | 0.108 | 66 | 8  |
| --          | chr3 | 197368446 | T      | C | -- | -- | IGR     | SNP | 0.156 | 76 | 14 |
| KIAA0226    | chr3 | 197451996 | C      | T | -- | -- | Intron  | SNP | 0.328 | 39 | 19 |
| KIAA0226    | chr3 | 197470017 | GC     | - | -- | -- | Intron  | DEL | 0.429 | 40 | 30 |
| FYTTD1      | chr3 | 197500479 | G      | C | -- | -- | Intron  | SNP | 0.250 | 36 | 12 |
| IQCG        | chr3 | 197657072 | C      | T | -- | -- | Intron  | SNP | 0.240 | 38 | 12 |
| --          | chr3 | 197777597 | T      | A | -- | -- | IGR     | SNP | 0.250 | 30 | 10 |
| --          | chr3 | 197825796 | A      | T | -- | -- | IGR     | SNP | 0.129 | 61 | 9  |
| --          | chr3 | 197828061 | G      | A | -- | -- | IGR     | SNP | 0.158 | 64 | 12 |
| --          | chr3 | 197830853 | A      | G | -- | -- | IGR     | SNP | 0.107 | 25 | 3  |
| --          | chr3 | 197831181 | A      | G | -- | -- | IGR     | SNP | 0.222 | 14 | 4  |
| --          | chr3 | 197832182 | G      | A | -- | -- | IGR     | SNP | 0.167 | 20 | 4  |
| --          | chr3 | 197832183 | C      | G | -- | -- | IGR     | SNP | 0.208 | 19 | 5  |
| --          | chr3 | 197832330 | G      | A | -- | -- | IGR     | SNP | 0.130 | 20 | 3  |
| --          | chr3 | 197866722 | G      | T | -- | -- | IGR     | SNP | 0.188 | 26 | 6  |
| ZNF595,ZNF7 | chr4 | 54861     | C      | T | -- | -- | Intron  | SNP | 0.288 | 79 | 32 |
| ZNF876P     | chr4 | 250569    | G      | A | -- | -- | 3'Flank | SNP | 0.300 | 35 | 15 |
| ABCA11P     | chr4 | 455863    | T      | A | -- | -- | RNA     | SNP | 0.211 | 30 | 8  |
| PDE6B       | chr4 | 659617    | C      | T | -- | -- | Intron  | SNP | 0.146 | 35 | 6  |
| PCGF3       | chr4 | 710827    | G      | T | -- | -- | Intron  | SNP | 0.132 | 33 | 5  |
| CPLX1       | chr4 | 791556    | C      | T | -- | -- | Intron  | SNP | 0.300 | 7  | 3  |
| FGFRL1      | chr4 | 1007373   | C      | T | -- | -- | Intron  | SNP | 0.185 | 44 | 10 |
| RNF212      | chr4 | 1089415   | A      | G | -- | -- | Intron  | SNP | 0.100 | 63 | 7  |
| RNF212      | chr4 | 1089418   | C      | T | -- | -- | Intron  | SNP | 0.104 | 60 | 7  |
| RNF212      | chr4 | 1089445   | C      | T | -- | -- | Intron  | SNP | 0.212 | 41 | 11 |
| --          | chr4 | 1119398   | TC     | - | -- | -- | IGR     | DEL | 0.160 | 21 | 4  |
| --          | chr4 | 1128864   | G      | A | -- | -- | IGR     | SNP | 0.698 | 13 | 30 |
| --          | chr4 | 1129005   | G      | C | -- | -- | IGR     | SNP | 0.641 | 14 | 25 |
| --          | chr4 | 1138558   | T      | C | -- | -- | IGR     | SNP | 0.130 | 47 | 7  |
| CTBP1       | chr4 | 1230357   | G      | A | -- | -- | Intron  | SNP | 0.143 | 48 | 8  |
| --          | chr4 | 1421350   | T      | C | -- | -- | IGR     | SNP | 0.125 | 35 | 5  |
| --          | chr4 | 1421572   | C      | G | -- | -- | IGR     | SNP | 0.100 | 27 | 3  |
| --          | chr4 | 1422379   | T      | C | -- | -- | IGR     | SNP | 0.170 | 73 | 15 |
| --          | chr4 | 1422813   | TC     | - | -- | -- | IGR     | DEL | 0.103 | 26 | 3  |
| --          | chr4 | 1508590   | T      | A | -- | -- | IGR     | SNP | 0.190 | 17 | 4  |
| --          | chr4 | 1575477   | A      | C | -- | -- | IGR     | SNP | 0.190 | 17 | 4  |
| FAM53A      | chr4 | 1667756   | CT     | - | -- | -- | Intron  | DEL | 0.143 | 12 | 2  |
| WHSC1       | chr4 | 1892965   | C      | G | -- | -- | Intron  | SNP | 0.391 | 39 | 25 |
| POLN        | chr4 | 2095969   | G      | T | -- | -- | Intron  | SNP | 0.280 | 36 | 14 |
| LOC402160   | chr4 | 2432069   | G      | A | -- | -- | Intron  | SNP | 0.108 | 83 | 10 |
| FAM193A     | chr4 | 2683714   | G      | T | -- | -- | Intron  | SNP | 0.154 | 22 | 4  |
| RGS12       | chr4 | 3317504   | C      | T | -- | -- | Intron  | SNP | 0.350 | 26 | 14 |
| RGS12       | chr4 | 3317505   | C      | G | -- | -- | Intron  | SNP | 0.366 | 26 | 15 |
| RGS12       | chr4 | 3400443   | C      | T | -- | -- | Intron  | SNP | 0.273 | 24 | 9  |
| --          | chr4 | 3623245   | G      | T | -- | -- | IGR     | SNP | 0.122 | 43 | 6  |
| --          | chr4 | 3763374   | T      | G | -- | -- | IGR     | SNP | 0.483 | 31 | 29 |
| --          | chr4 | 3875852   | G      | A | -- | -- | IGR     | SNP | 0.303 | 23 | 10 |
| --          | chr4 | 3907636   | G      | A | -- | -- | IGR     | SNP | 0.250 | 21 | 7  |
| --          | chr4 | 3977809   | T      | A | -- | -- | IGR     | SNP | 0.148 | 23 | 4  |
| --          | chr4 | 4003627   | C      | T | -- | -- | IGR     | SNP | 0.146 | 35 | 6  |
| --          | chr4 | 4031845   | T      | A | -- | -- | IGR     | SNP | 0.146 | 35 | 6  |
| --          | chr4 | 4039580   | C      | G | -- | -- | IGR     | SNP | 0.184 | 31 | 7  |
| --          | chr4 | 4039587   | TTTTTA | - | -- | -- | IGR     | DEL | 0.179 | 32 | 7  |
| --          | chr4 | 4039605   | C      | T | -- | -- | IGR     | SNP | 0.194 | 29 | 7  |
| --          | chr4 | 4040165   | C      | G | -- | -- | IGR     | SNP | 0.500 | 6  | 6  |
| --          | chr4 | 4050861   | G      | A | -- | -- | IGR     | SNP | 0.421 | 11 | 8  |
| --          | chr4 | 4172957   | A      | C | -- | -- | IGR     | SNP | 0.108 | 33 | 4  |
| OTOP1       | chr4 | 4225434   | C      | T | -- | -- | Intron  | SNP | 0.120 | 44 | 6  |
| OTOP1       | chr4 | 4225435   | T      | G | -- | -- | Intron  | SNP | 0.120 | 44 | 6  |
| LOC1005072€ | chr4 | 4592791   | C      | T | -- | -- | RNA     | SNP | 0.214 | 44 | 12 |
| LOC1005072€ | chr4 | 4647097   | G      | T | -- | -- | RNA     | SNP | 0.167 | 15 | 3  |
| --          | chr4 | 4819258   | G      | C | -- | -- | IGR     | SNP | 0.229 | 37 | 11 |
| --          | chr4 | 4881166   | T      | A | -- | -- | IGR     | SNP | 0.686 | 16 | 35 |
| --          | chr4 | 4976926   | A      | G | -- | -- | IGR     | SNP | 0.571 | 18 | 24 |
| STK32B      | chr4 | 5351608   | G      | A | -- | -- | Intron  | SNP | 0.667 | 7  | 14 |
| EVC         | chr4 | 5725609   | C      | A | -- | -- | Intron  | SNP | 0.256 | 29 | 10 |
| EVC         | chr4 | 5754526   | A      | T | -- | -- | Intron  | SNP | 0.333 | 38 | 19 |
| CRMP1       | chr4 | 5841557   | C      | T | -- | -- | Intron  | SNP | 0.455 | 24 | 20 |
| CRMP1       | chr4 | 5874368   | C      | T | -- | -- | Intron  | SNP | 0.255 | 38 | 13 |
| CRMP1       | chr4 | 5884680   | CT     | - | -- | -- | Intron  | DEL | 0.229 | 37 | 11 |
| --          | chr4 | 5909528   | A      | T | -- | -- | IGR     | SNP | 0.277 | 34 | 13 |
| PPP2R2C     | chr4 | 6449599   | A      | T | -- | -- | Intron  | SNP | 0.277 | 34 | 13 |
| --          | chr4 | 7137523   | G      | A | -- | -- | IGR     | SNP | 0.200 | 36 | 9  |
| SORCS2      | chr4 | 7209528   | A      | T | -- | -- | Intron  | SNP | 0.325 | 27 | 13 |
| SORCS2      | chr4 | 7227467   | T      | A | -- | -- | Intron  | SNP | 0.107 | 50 | 6  |

|             |      |          |       |     |       |       |                 |     |       |    |    |
|-------------|------|----------|-------|-----|-------|-------|-----------------|-----|-------|----|----|
| SORCS2      | chr4 | 7345454  | C     | A   | --    | --    | Intron          | SNP | 0.298 | 33 | 14 |
| SORCS2      | chr4 | 7490563  | C     | T   | --    | --    | Intron          | SNP | 0.284 | 48 | 19 |
| SORCS2      | chr4 | 7546946  | G     | C   | --    | --    | Intron          | SNP | 0.250 | 27 | 9  |
| SORCS2      | chr4 | 7570179  | C     | A   | --    | --    | Intron          | SNP | 0.140 | 49 | 8  |
| SORCS2      | chr4 | 7656326  | C     | A   | --    | --    | Intron          | SNP | 0.170 | 39 | 8  |
| AFAP1       | chr4 | 7882025  | G     | T   | --    | --    | Intron          | SNP | 0.167 | 20 | 4  |
| ABLIM2      | chr4 | 7972493  | T     | A   | --    | --    | Intron          | SNP | 0.362 | 30 | 17 |
| ABLIM2      | chr4 | 8036168  | T     | C   | --    | --    | Intron          | SNP | 0.658 | 13 | 25 |
| SH3TC1      | chr4 | 8237095  | C     | T   | --    | --    | Intron          | SNP | 0.231 | 40 | 12 |
| --          | chr4 | 8325256  | G     | A   | --    | --    | IGR             | SNP | 0.157 | 43 | 8  |
| ACOX3       | chr4 | 8410323  | A     | T   | --    | --    | Intron          | SNP | 0.362 | 37 | 21 |
| --          | chr4 | 8992633  | AAT   | -   | --    | --    | IGR             | DEL | 0.111 | 16 | 2  |
| --          | chr4 | 9014814  | T     | C   | --    | --    | IGR             | SNP | 0.217 | 18 | 5  |
| --          | chr4 | 9040771  | AT    | -   | --    | --    | IGR             | DEL | 0.172 | 24 | 5  |
| --          | chr4 | 9040801  | G     | A   | --    | --    | IGR             | SNP | 0.156 | 27 | 5  |
| --          | chr4 | 9049214  | C     | T   | --    | --    | IGR             | SNP | 0.278 | 13 | 5  |
| --          | chr4 | 9075825  | A     | G   | --    | --    | IGR             | SNP | 0.128 | 34 | 5  |
| --          | chr4 | 9075871  | G     | A   | --    | --    | IGR             | SNP | 0.109 | 41 | 5  |
| --          | chr4 | 9120791  | C     | T   | --    | --    | IGR             | SNP | 0.267 | 11 | 4  |
| LOC728369,L | chr4 | 9326670  | G     | A   | --    | --    | 5'Flank         | SNP | 0.100 | 27 | 3  |
| --          | chr4 | 9389466  | A     | G   | --    | --    | IGR             | SNP | 0.161 | 26 | 5  |
| --          | chr4 | 9471909  | -     | CTA | --    | --    | IGR             | INS | 0.158 | 32 | 6  |
| --          | chr4 | 9504477  | -     | GC  | --    | --    | IGR             | INS | 0.200 | 12 | 3  |
| --          | chr4 | 9548890  | T     | A   | --    | --    | IGR             | SNP | 0.171 | 29 | 6  |
| --          | chr4 | 9548904  | C     | A   | --    | --    | IGR             | SNP | 0.188 | 26 | 6  |
| --          | chr4 | 9567919  | A     | T   | --    | --    | IGR             | SNP | 0.308 | 9  | 4  |
| --          | chr4 | 9605135  | G     | T   | --    | --    | IGR             | SNP | 0.227 | 17 | 5  |
| --          | chr4 | 9703289  | G     | T   | --    | --    | IGR             | SNP | 0.206 | 27 | 7  |
| DRD5        | chr4 | 9784478  | C     | A   | C825A | S275R | Missense_mutati | SNP | 0.135 | 32 | 5  |
| --          | chr4 | 9792551  | C     | T   | --    | --    | IGR             | SNP | 0.154 | 33 | 6  |
| --          | chr4 | 9792604  | A     | G   | --    | --    | IGR             | SNP | 0.143 | 30 | 5  |
| --          | chr4 | 9792756  | CTGTA | -   | --    | --    | IGR             | DEL | 0.211 | 30 | 8  |
| --          | chr4 | 9792823  | G     | A   | --    | --    | IGR             | SNP | 0.222 | 28 | 8  |
| SLC2A9      | chr4 | 9889328  | C     | T   | --    | --    | Intron          | SNP | 0.381 | 26 | 16 |
| SLC2A9      | chr4 | 9908039  | G     | A   | --    | --    | Intron          | SNP | 0.638 | 17 | 30 |
| SLC2A9      | chr4 | 9960861  | C     | A   | --    | --    | Intron          | SNP | 0.167 | 20 | 4  |
| WDR1        | chr4 | 10095303 | T     | A   | --    | --    | Intron          | SNP | 0.643 | 30 | 54 |
| CLNK        | chr4 | 10539368 | CTT   | -   | --    | --    | Intron          | DEL | 0.152 | 28 | 5  |
| CLNK        | chr4 | 10546383 | G     | T   | --    | --    | Intron          | SNP | 0.209 | 34 | 9  |
| CLNK        | chr4 | 10679976 | -     | AAT | --    | --    | Intron          | INS | 0.250 | 32 | 11 |
| --          | chr4 | 10782366 | T     | G   | --    | --    | IGR             | SNP | 0.120 | 22 | 3  |
| --          | chr4 | 10782373 | G     | C   | --    | --    | IGR             | SNP | 0.120 | 22 | 3  |
| --          | chr4 | 10825229 | ATG   | -   | --    | --    | IGR             | DEL | 0.122 | 36 | 5  |
| --          | chr4 | 10994674 | C     | G   | --    | --    | IGR             | SNP | 0.250 | 33 | 11 |
| --          | chr4 | 11024650 | G     | C   | --    | --    | IGR             | SNP | 0.303 | 23 | 10 |
| --          | chr4 | 11150107 | T     | C   | --    | --    | IGR             | SNP | 0.182 | 18 | 4  |
| --          | chr4 | 11244335 | G     | A   | --    | --    | IGR             | SNP | 0.227 | 34 | 10 |
| --          | chr4 | 11353680 | A     | G   | --    | --    | IGR             | SNP | 0.291 | 39 | 16 |
| --          | chr4 | 11651967 | T     | A   | --    | --    | IGR             | SNP | 0.375 | 10 | 6  |
| --          | chr4 | 11655471 | -     | CA  | --    | --    | IGR             | INS | 0.188 | 26 | 6  |
| --          | chr4 | 11724924 | G     | T   | --    | --    | IGR             | SNP | 0.353 | 22 | 12 |
| --          | chr4 | 11746842 | C     | T   | --    | --    | IGR             | SNP | 0.258 | 23 | 8  |
| --          | chr4 | 11934085 | C     | G   | --    | --    | IGR             | SNP | 0.265 | 36 | 13 |
| --          | chr4 | 12056998 | G     | A   | --    | --    | IGR             | SNP | 0.564 | 17 | 22 |
| --          | chr4 | 12110033 | CAT   | -   | --    | --    | IGR             | DEL | 0.125 | 21 | 3  |
| --          | chr4 | 12824661 | C     | T   | --    | --    | IGR             | SNP | 0.357 | 27 | 15 |
| --          | chr4 | 12864344 | A     | C   | --    | --    | IGR             | SNP | 0.600 | 10 | 15 |
| --          | chr4 | 12910406 | A     | T   | --    | --    | IGR             | SNP | 0.286 | 10 | 4  |
| --          | chr4 | 12975559 | G     | T   | --    | --    | IGR             | SNP | 0.182 | 36 | 8  |
| --          | chr4 | 13144652 | A     | T   | --    | --    | IGR             | SNP | 0.161 | 26 | 5  |
| --          | chr4 | 13268759 | T     | A   | --    | --    | IGR             | SNP | 0.133 | 39 | 6  |
| --          | chr4 | 13280169 | G     | A   | --    | --    | IGR             | SNP | 0.358 | 34 | 19 |
| --          | chr4 | 13705799 | C     | T   | --    | --    | IGR             | SNP | 0.600 | 20 | 30 |
| --          | chr4 | 13944526 | T     | C   | --    | --    | IGR             | SNP | 0.196 | 45 | 11 |
| --          | chr4 | 14077443 | G     | C   | --    | --    | IGR             | SNP | 0.545 | 15 | 18 |
| --          | chr4 | 14178306 | A     | T   | --    | --    | IGR             | SNP | 0.681 | 15 | 32 |
| --          | chr4 | 14209057 | A     | T   | --    | --    | IGR             | SNP | 0.214 | 22 | 6  |
| --          | chr4 | 14209092 | T     | G   | --    | --    | IGR             | SNP | 0.200 | 24 | 6  |
| --          | chr4 | 14213503 | A     | G   | --    | --    | IGR             | SNP | 0.308 | 9  | 4  |
| --          | chr4 | 14347735 | C     | T   | --    | --    | IGR             | SNP | 0.436 | 22 | 17 |
| --          | chr4 | 14373037 | A     | T   | --    | --    | IGR             | SNP | 0.333 | 28 | 14 |
| --          | chr4 | 14422672 | -     | TA  | --    | --    | IGR             | INS | 0.158 | 16 | 3  |
| --          | chr4 | 14424115 | G     | T   | --    | --    | IGR             | SNP | 0.267 | 11 | 4  |
| --          | chr4 | 14424360 | -     | GT  | --    | --    | IGR             | INS | 0.120 | 22 | 3  |
| --          | chr4 | 14461117 | G     | C   | --    | --    | IGR             | SNP | 0.556 | 24 | 30 |
| --          | chr4 | 14476227 | G     | A   | --    | --    | IGR             | SNP | 0.600 | 22 | 33 |
| --          | chr4 | 14507137 | -     | TG  | --    | --    | IGR             | INS | 0.351 | 24 | 13 |
| LOC441009   | chr4 | 14923517 | GTTTC | -   | --    | --    | RNA             | DEL | 0.120 | 22 | 3  |
| LOC441009   | chr4 | 14950461 | T     | C   | --    | --    | RNA             | SNP | 0.333 | 8  | 4  |
| CC2D2A      | chr4 | 15581902 | G     | A   | --    | --    | Intron          | SNP | 0.300 | 21 | 9  |



|           |      |          |    |       |       |       |                 |     |       |    |    |
|-----------|------|----------|----|-------|-------|-------|-----------------|-----|-------|----|----|
| BST1      | chr4 | 15730286 | G  | T     | --    | --    | Intron          | SNP | 0.286 | 10 | 4  |
| --        | chr4 | 15759340 | C  | G     | --    | --    | IGR             | SNP | 0.742 | 8  | 23 |
| --        | chr4 | 15854451 | G  | T     | --    | --    | IGR             | SNP | 0.200 | 16 | 4  |
| FGFBP2    | chr4 | 15965646 | A  | G     | --    | --    | 5'Flank         | SNP | 0.286 | 30 | 12 |
| PROM1     | chr4 | 16050634 | T  | A     | --    | --    | Intron          | SNP | 0.273 | 32 | 12 |
| --        | chr4 | 16395417 | A  | G     | --    | --    | IGR             | SNP | 0.500 | 3  | 3  |
| --        | chr4 | 16464551 | CA | -     | --    | --    | IGR             | DEL | 0.463 | 22 | 19 |
| LDB2      | chr4 | 16650424 | C  | A     | --    | --    | Intron          | SNP | 0.333 | 18 | 9  |
| --        | chr4 | 16954844 | G  | C     | --    | --    | IGR             | SNP | 0.259 | 20 | 7  |
| --        | chr4 | 16972546 | C  | T     | --    | --    | IGR             | SNP | 0.692 | 4  | 9  |
| --        | chr4 | 17295992 | G  | T     | --    | --    | IGR             | SNP | 0.278 | 26 | 10 |
| --        | chr4 | 17379649 | G  | A     | --    | --    | IGR             | SNP | 0.725 | 14 | 37 |
| --        | chr4 | 17543402 | TA | -     | --    | --    | IGR             | DEL | 0.133 | 26 | 4  |
| LCORL     | chr4 | 18011745 | T  | G     | --    | --    | Intron          | SNP | 0.643 | 15 | 27 |
| --        | chr4 | 18200797 | C  | T     | --    | --    | IGR             | SNP | 0.350 | 39 | 21 |
| --        | chr4 | 18270035 | T  | C     | --    | --    | IGR             | SNP | 0.273 | 8  | 3  |
| --        | chr4 | 18388429 | C  | G     | --    | --    | IGR             | SNP | 0.257 | 26 | 9  |
| --        | chr4 | 18421844 | C  | T     | --    | --    | IGR             | SNP | 0.512 | 20 | 21 |
| --        | chr4 | 18495623 | AT | -     | --    | --    | IGR             | DEL | 0.136 | 19 | 3  |
| --        | chr4 | 18529129 | G  | A     | --    | --    | IGR             | SNP | 0.316 | 26 | 12 |
| --        | chr4 | 18623407 | C  | T     | --    | --    | IGR             | SNP | 0.250 | 27 | 9  |
| --        | chr4 | 18672332 | C  | A     | --    | --    | IGR             | SNP | 0.412 | 20 | 14 |
| --        | chr4 | 19124510 | C  | A     | --    | --    | IGR             | SNP | 0.250 | 24 | 8  |
| --        | chr4 | 19222717 | A  | T     | --    | --    | IGR             | SNP | 0.176 | 28 | 6  |
| --        | chr4 | 19514821 | T  | C     | --    | --    | IGR             | SNP | 0.241 | 22 | 7  |
| --        | chr4 | 19610538 | A  | T     | --    | --    | IGR             | SNP | 0.261 | 17 | 6  |
| --        | chr4 | 19641162 | G  | T     | --    | --    | IGR             | SNP | 0.455 | 6  | 5  |
| --        | chr4 | 19641175 | A  | G     | --    | --    | IGR             | SNP | 0.462 | 7  | 6  |
| --        | chr4 | 19643040 | G  | A     | --    | --    | IGR             | SNP | 0.627 | 19 | 32 |
| --        | chr4 | 19746298 | G  | A     | --    | --    | IGR             | SNP | 0.270 | 27 | 10 |
| --        | chr4 | 19860243 | A  | T     | --    | --    | IGR             | SNP | 0.380 | 31 | 19 |
| --        | chr4 | 19953495 | C  | T     | --    | --    | IGR             | SNP | 0.463 | 22 | 19 |
| --        | chr4 | 20056125 | A  | C     | --    | --    | IGR             | SNP | 0.367 | 19 | 11 |
| --        | chr4 | 20089738 | C  | A     | --    | --    | IGR             | SNP | 0.344 | 21 | 11 |
| --        | chr4 | 20145420 | G  | T     | --    | --    | IGR             | SNP | 0.179 | 23 | 5  |
| --        | chr4 | 20207884 | T  | A     | --    | --    | IGR             | SNP | 0.171 | 29 | 6  |
| SLIT2     | chr4 | 20306058 | A  | T     | --    | --    | Intron          | SNP | 0.232 | 43 | 13 |
| SLIT2     | chr4 | 20402876 | T  | A     | --    | --    | Intron          | SNP | 0.333 | 28 | 14 |
| SLIT2     | chr4 | 20507385 | G  | C     | --    | --    | Intron          | SNP | 0.343 | 23 | 12 |
| --        | chr4 | 20637884 | C  | G     | --    | --    | IGR             | SNP | 0.550 | 18 | 22 |
| --        | chr4 | 20684805 | C  | A     | --    | --    | IGR             | SNP | 0.111 | 40 | 5  |
| --        | chr4 | 20684806 | C  | T     | --    | --    | IGR             | SNP | 0.111 | 40 | 5  |
| KCNIP4    | chr4 | 20735811 | G  | T     | --    | --    | Intron          | SNP | 0.425 | 23 | 17 |
| KCNIP4    | chr4 | 21038398 | T  | G     | --    | --    | Intron          | SNP | 0.263 | 28 | 10 |
| KCNIP4    | chr4 | 21116197 | C  | T     | --    | --    | Intron          | SNP | 0.207 | 23 | 6  |
| KCNIP4    | chr4 | 21130630 | A  | G     | --    | --    | Intron          | SNP | 0.300 | 35 | 15 |
| KCNIP4    | chr4 | 21194824 | T  | A     | --    | --    | Intron          | SNP | 0.409 | 13 | 9  |
| KCNIP4    | chr4 | 21305694 | G  | C     | --    | --    | Intron          | SNP | 0.174 | 19 | 4  |
| KCNIP4    | chr4 | 21324077 | A  | T     | --    | --    | Intron          | SNP | 0.280 | 36 | 14 |
| KCNIP4    | chr4 | 21443873 | C  | A     | --    | --    | Intron          | SNP | 0.229 | 27 | 8  |
| KCNIP4    | chr4 | 21555582 | C  | G     | --    | --    | Intron          | SNP | 0.340 | 35 | 18 |
| KCNIP4    | chr4 | 21716235 | T  | G     | --    | --    | Intron          | SNP | 0.455 | 18 | 15 |
| KCNIP4    | chr4 | 21758918 | GA | -     | --    | --    | Intron          | DEL | 0.111 | 16 | 2  |
| KCNIP4    | chr4 | 21833968 | C  | G     | --    | --    | Intron          | SNP | 0.222 | 21 | 6  |
| KCNIP4    | chr4 | 21897695 | T  | A     | --    | --    | Intron          | SNP | 0.176 | 28 | 6  |
| KCNIP4    | chr4 | 21911510 | C  | T     | --    | --    | Intron          | SNP | 0.706 | 10 | 24 |
| --        | chr4 | 22082177 | C  | T     | --    | --    | IGR             | SNP | 0.340 | 33 | 17 |
| --        | chr4 | 22303052 | A  | C     | --    | --    | IGR             | SNP | 0.538 | 18 | 21 |
| GPR125    | chr4 | 22463406 | T  | A     | A355T | S119C | Missense_mutati | SNP | 0.226 | 24 | 7  |
| --        | chr4 | 22651335 | A  | T     | --    | --    | IGR             | SNP | 0.278 | 26 | 10 |
| --        | chr4 | 22655673 | G  | T     | --    | --    | IGR             | SNP | 0.250 | 39 | 13 |
| --        | chr4 | 22940455 | G  | A     | --    | --    | IGR             | SNP | 0.528 | 17 | 19 |
| --        | chr4 | 22989640 | A  | T     | --    | --    | IGR             | SNP | 0.200 | 36 | 9  |
| --        | chr4 | 23064356 | C  | T     | --    | --    | IGR             | SNP | 0.378 | 28 | 17 |
| MIR548AJ2 | chr4 | 23232219 | G  | C     | --    | --    | RNA             | SNP | 0.558 | 19 | 24 |
| MIR548AJ2 | chr4 | 23241884 | A  | G     | --    | --    | RNA             | SNP | 0.267 | 44 | 16 |
| MIR548AJ2 | chr4 | 23353854 | G  | A     | --    | --    | RNA             | SNP | 0.200 | 20 | 5  |
| MIR548AJ2 | chr4 | 23438326 | A  | C     | --    | --    | RNA             | SNP | 0.256 | 29 | 10 |
| --        | chr4 | 23725205 | G  | A     | --    | --    | IGR             | SNP | 0.222 | 14 | 4  |
| --        | chr4 | 23725998 | G  | A     | --    | --    | IGR             | SNP | 0.136 | 19 | 3  |
| --        | chr4 | 23782256 | G  | A     | --    | --    | IGR             | SNP | 0.457 | 19 | 16 |
| PPARGC1A  | chr4 | 23843271 | G  | C     | --    | --    | Intron          | SNP | 0.524 | 10 | 11 |
| --        | chr4 | 23948434 | -  | TAC   | --    | --    | IGR             | INS | 0.182 | 27 | 6  |
| --        | chr4 | 24054477 | A  | T     | --    | --    | IGR             | SNP | 0.214 | 11 | 3  |
| --        | chr4 | 24148230 | C  | T     | --    | --    | IGR             | SNP | 0.222 | 42 | 12 |
| CCDC149   | chr4 | 24945346 | -  | AAAAC | --    | --    | Intron          | INS | 0.167 | 15 | 3  |
| --        | chr4 | 24986658 | C  | T     | --    | --    | IGR             | SNP | 0.390 | 25 | 16 |
| LGI2      | chr4 | 25007843 | C  | G     | --    | --    | Intron          | SNP | 0.263 | 28 | 10 |
| --        | chr4 | 25086431 | G  | A     | --    | --    | IGR             | SNP | 0.200 | 24 | 6  |
| LOC285540 | chr4 | 25175553 | G  | C     | --    | --    | RNA             | SNP | 0.607 | 11 | 17 |

|           |      |          |     |    |    |    |        |     |       |    |    |
|-----------|------|----------|-----|----|----|----|--------|-----|-------|----|----|
| LOC285540 | chr4 | 25198793 | T   | C  | -- | -- | RNA    | SNP | 0.308 | 27 | 12 |
| --        | chr4 | 25716174 | -   | CT | -- | -- | IGR    | INS | 0.111 | 24 | 3  |
| --        | chr4 | 25737190 | C   | G  | -- | -- | IGR    | SNP | 0.375 | 20 | 12 |
| --        | chr4 | 25972583 | C   | G  | -- | -- | IGR    | SNP | 0.268 | 30 | 11 |
| --        | chr4 | 26569725 | TG  | -  | -- | -- | IGR    | DEL | 0.125 | 28 | 4  |
| TBC1D19   | chr4 | 26715050 | A   | C  | -- | -- | Intron | SNP | 0.361 | 23 | 13 |
| --        | chr4 | 27138522 | A   | C  | -- | -- | IGR    | SNP | 0.533 | 14 | 16 |
| --        | chr4 | 27345681 | C   | T  | -- | -- | IGR    | SNP | 0.596 | 19 | 28 |
| --        | chr4 | 27967514 | T   | C  | -- | -- | IGR    | SNP | 0.205 | 35 | 9  |
| --        | chr4 | 28001968 | T   | A  | -- | -- | IGR    | SNP | 0.172 | 24 | 5  |
| --        | chr4 | 28095235 | A   | C  | -- | -- | IGR    | SNP | 0.279 | 31 | 12 |
| --        | chr4 | 28250729 | T   | C  | -- | -- | IGR    | SNP | 0.378 | 23 | 14 |
| --        | chr4 | 28251068 | T   | A  | -- | -- | IGR    | SNP | 0.263 | 28 | 10 |
| --        | chr4 | 28315079 | G   | C  | -- | -- | IGR    | SNP | 0.100 | 27 | 3  |
| --        | chr4 | 28349956 | T   | A  | -- | -- | IGR    | SNP | 0.489 | 23 | 22 |
| --        | chr4 | 28407033 | C   | A  | -- | -- | IGR    | SNP | 0.265 | 25 | 9  |
| --        | chr4 | 28455022 | G   | T  | -- | -- | IGR    | SNP | 0.524 | 20 | 22 |
| --        | chr4 | 28508544 | A   | C  | -- | -- | IGR    | SNP | 0.333 | 22 | 11 |
| --        | chr4 | 28516140 | A   | G  | -- | -- | IGR    | SNP | 0.192 | 21 | 5  |
| --        | chr4 | 28615551 | A   | T  | -- | -- | IGR    | SNP | 0.190 | 34 | 8  |
| --        | chr4 | 28634797 | C   | G  | -- | -- | IGR    | SNP | 0.317 | 28 | 13 |
| --        | chr4 | 28651256 | T   | G  | -- | -- | IGR    | SNP | 0.583 | 15 | 21 |
| --        | chr4 | 28704147 | T   | A  | -- | -- | IGR    | SNP | 0.233 | 23 | 7  |
| --        | chr4 | 28710835 | C   | T  | -- | -- | IGR    | SNP | 0.839 | 5  | 26 |
| --        | chr4 | 28813568 | C   | T  | -- | -- | IGR    | SNP | 0.235 | 13 | 4  |
| --        | chr4 | 29002390 | C   | A  | -- | -- | IGR    | SNP | 0.486 | 19 | 18 |
| --        | chr4 | 29264212 | A   | T  | -- | -- | IGR    | SNP | 0.257 | 26 | 9  |
| --        | chr4 | 29271520 | T   | G  | -- | -- | IGR    | SNP | 0.311 | 31 | 14 |
| --        | chr4 | 29327066 | C   | A  | -- | -- | IGR    | SNP | 0.478 | 12 | 11 |
| --        | chr4 | 29393428 | GTA | -  | -- | -- | IGR    | DEL | 0.118 | 15 | 2  |
| --        | chr4 | 29398358 | T   | C  | -- | -- | IGR    | SNP | 0.645 | 11 | 20 |
| --        | chr4 | 29415852 | A   | T  | -- | -- | IGR    | SNP | 0.222 | 14 | 4  |
| --        | chr4 | 29433996 | G   | T  | -- | -- | IGR    | SNP | 0.178 | 37 | 8  |
| --        | chr4 | 29505955 | T   | A  | -- | -- | IGR    | SNP | 0.579 | 8  | 11 |
| --        | chr4 | 29538606 | T   | C  | -- | -- | IGR    | SNP | 0.222 | 28 | 8  |
| --        | chr4 | 29540596 | C   | A  | -- | -- | IGR    | SNP | 0.800 | 4  | 16 |
| --        | chr4 | 29675253 | GC  | -  | -- | -- | IGR    | DEL | 0.114 | 31 | 4  |
| --        | chr4 | 29852766 | T   | C  | -- | -- | IGR    | SNP | 0.286 | 30 | 12 |
| --        | chr4 | 29892788 | C   | G  | -- | -- | IGR    | SNP | 0.385 | 24 | 15 |
| --        | chr4 | 29913347 | G   | T  | -- | -- | IGR    | SNP | 0.250 | 33 | 11 |
| --        | chr4 | 29966570 | T   | G  | -- | -- | IGR    | SNP | 0.541 | 17 | 20 |
| --        | chr4 | 30095486 | A   | G  | -- | -- | IGR    | SNP | 0.219 | 25 | 7  |
| --        | chr4 | 30114320 | T   | A  | -- | -- | IGR    | SNP | 0.261 | 34 | 12 |
| --        | chr4 | 30222436 | T   | A  | -- | -- | IGR    | SNP | 0.515 | 16 | 17 |
| --        | chr4 | 30415442 | A   | G  | -- | -- | IGR    | SNP | 0.269 | 19 | 7  |
| --        | chr4 | 30623947 | C   | T  | -- | -- | IGR    | SNP | 0.178 | 37 | 8  |
| --        | chr4 | 30652888 | C   | A  | -- | -- | IGR    | SNP | 0.308 | 18 | 8  |
| --        | chr4 | 30671523 | CT  | -  | -- | -- | IGR    | DEL | 0.405 | 22 | 15 |
| PCDH7     | chr4 | 30796707 | C   | A  | -- | -- | Intron | SNP | 0.286 | 15 | 6  |
| PCDH7     | chr4 | 30989449 | A   | T  | -- | -- | Intron | SNP | 0.450 | 11 | 9  |
| PCDH7     | chr4 | 31040256 | T   | G  | -- | -- | Intron | SNP | 0.568 | 16 | 21 |
| PCDH7     | chr4 | 31081642 | C   | T  | -- | -- | Intron | SNP | 0.419 | 18 | 13 |
| --        | chr4 | 31179288 | T   | A  | -- | -- | IGR    | SNP | 0.208 | 19 | 5  |
| --        | chr4 | 31960259 | G   | T  | -- | -- | IGR    | SNP | 0.441 | 19 | 15 |
| --        | chr4 | 32199342 | T   | C  | -- | -- | IGR    | SNP | 0.333 | 26 | 13 |
| --        | chr4 | 32203268 | C   | T  | -- | -- | IGR    | SNP | 0.429 | 4  | 3  |
| --        | chr4 | 32212446 | T   | G  | -- | -- | IGR    | SNP | 0.189 | 30 | 7  |
| --        | chr4 | 32286485 | T   | C  | -- | -- | IGR    | SNP | 0.409 | 13 | 9  |
| --        | chr4 | 32366022 | G   | T  | -- | -- | IGR    | SNP | 0.333 | 6  | 3  |
| --        | chr4 | 32401228 | ATG | -  | -- | -- | IGR    | DEL | 0.214 | 11 | 3  |
| --        | chr4 | 32404407 | G   | T  | -- | -- | IGR    | SNP | 0.769 | 6  | 20 |
| --        | chr4 | 32686728 | T   | A  | -- | -- | IGR    | SNP | 0.229 | 27 | 8  |
| --        | chr4 | 32815487 | A   | C  | -- | -- | IGR    | SNP | 0.179 | 23 | 5  |
| --        | chr4 | 32822712 | G   | T  | -- | -- | IGR    | SNP | 0.300 | 7  | 3  |
| --        | chr4 | 32921024 | A   | G  | -- | -- | IGR    | SNP | 0.176 | 28 | 6  |
| --        | chr4 | 32983936 | A   | G  | -- | -- | IGR    | SNP | 0.692 | 12 | 27 |
| --        | chr4 | 33095770 | T   | C  | -- | -- | IGR    | SNP | 0.282 | 28 | 11 |
| --        | chr4 | 33108412 | A   | G  | -- | -- | IGR    | SNP | 0.321 | 19 | 9  |
| --        | chr4 | 33470123 | C   | T  | -- | -- | IGR    | SNP | 0.265 | 25 | 9  |
| --        | chr4 | 33571224 | G   | A  | -- | -- | IGR    | SNP | 0.355 | 20 | 11 |
| --        | chr4 | 33687794 | G   | C  | -- | -- | IGR    | SNP | 0.520 | 12 | 13 |
| --        | chr4 | 33687800 | A   | C  | -- | -- | IGR    | SNP | 0.500 | 12 | 12 |
| --        | chr4 | 33852197 | A   | G  | -- | -- | IGR    | SNP | 0.333 | 26 | 13 |
| --        | chr4 | 33873047 | C   | T  | -- | -- | IGR    | SNP | 0.458 | 13 | 11 |
| --        | chr4 | 34195520 | A   | G  | -- | -- | IGR    | SNP | 0.154 | 22 | 4  |
| --        | chr4 | 34514274 | -   | CA | -- | -- | IGR    | INS | 0.368 | 36 | 21 |
| --        | chr4 | 34556221 | G   | C  | -- | -- | IGR    | SNP | 0.465 | 23 | 20 |
| --        | chr4 | 34840738 | C   | T  | -- | -- | IGR    | SNP | 0.294 | 12 | 5  |
| --        | chr4 | 34916181 | T   | C  | -- | -- | IGR    | SNP | 0.281 | 23 | 9  |
| --        | chr4 | 35032653 | C   | T  | -- | -- | IGR    | SNP | 0.407 | 16 | 11 |

|          |      |          |       |    |        |       |                 |     |       |    |    |
|----------|------|----------|-------|----|--------|-------|-----------------|-----|-------|----|----|
| --       | chr4 | 35097526 | T     | C  | --     | --    | IGR             | SNP | 0.615 | 15 | 24 |
| --       | chr4 | 35174945 | C     | T  | --     | --    | IGR             | SNP | 0.256 | 32 | 11 |
| --       | chr4 | 35293249 | C     | T  | --     | --    | IGR             | SNP | 0.303 | 23 | 10 |
| --       | chr4 | 35500075 | C     | A  | --     | --    | IGR             | SNP | 0.483 | 15 | 14 |
| --       | chr4 | 35620491 | T     | G  | --     | --    | IGR             | SNP | 0.262 | 31 | 11 |
| --       | chr4 | 35633822 | G     | A  | --     | --    | IGR             | SNP | 0.517 | 14 | 15 |
| --       | chr4 | 35692509 | A     | T  | --     | --    | IGR             | SNP | 0.286 | 10 | 4  |
| --       | chr4 | 35789859 | A     | T  | --     | --    | IGR             | SNP | 0.308 | 27 | 12 |
| ARAP2    | chr4 | 36181437 | C     | A  | --     | --    | Intron          | SNP | 0.345 | 19 | 10 |
| --       | chr4 | 36535217 | C     | T  | --     | --    | IGR             | SNP | 0.273 | 24 | 9  |
| --       | chr4 | 36631787 | A     | T  | --     | --    | IGR             | SNP | 0.128 | 34 | 5  |
| --       | chr4 | 36779465 | G     | A  | --     | --    | IGR             | SNP | 0.286 | 25 | 10 |
| --       | chr4 | 36779734 | A     | T  | --     | --    | IGR             | SNP | 0.385 | 24 | 15 |
| --       | chr4 | 36967521 | C     | A  | --     | --    | IGR             | SNP | 0.200 | 28 | 7  |
| --       | chr4 | 36967522 | T     | C  | --     | --    | IGR             | SNP | 0.176 | 28 | 6  |
| --       | chr4 | 37173583 | C     | T  | --     | --    | IGR             | SNP | 0.632 | 14 | 24 |
| --       | chr4 | 37185044 | A     | G  | --     | --    | IGR             | SNP | 0.680 | 16 | 34 |
| --       | chr4 | 37205820 | C     | T  | --     | --    | IGR             | SNP | 0.667 | 11 | 22 |
| KIAA1239 | chr4 | 37295816 | C     | T  | --     | --    | Intron          | SNP | 0.595 | 15 | 22 |
| KIAA1239 | chr4 | 37313824 | T     | C  | --     | --    | Intron          | SNP | 0.333 | 4  | 2  |
| KIAA1239 | chr4 | 37314071 | G     | A  | --     | --    | Intron          | SNP | 0.214 | 11 | 3  |
| C4orf19  | chr4 | 37470611 | C     | A  | --     | --    | Intron          | SNP | 0.463 | 22 | 19 |
| --       | chr4 | 37738966 | T     | C  | --     | --    | IGR             | SNP | 0.279 | 49 | 19 |
| --       | chr4 | 39138592 | G     | A  | --     | --    | IGR             | SNP | 0.333 | 32 | 16 |
| WDR19    | chr4 | 39253892 | A     | G  | --     | --    | Intron          | SNP | 0.125 | 28 | 4  |
| LIAS     | chr4 | 39478191 | C     | G  | --     | --    | Intron          | SNP | 0.388 | 41 | 26 |
| --       | chr4 | 39814999 | G     | A  | --     | --    | IGR             | SNP | 0.375 | 10 | 6  |
| --       | chr4 | 40020563 | A     | T  | --     | --    | IGR             | SNP | 0.293 | 29 | 12 |
| --       | chr4 | 40029698 | C     | T  | --     | --    | IGR             | SNP | 0.381 | 26 | 16 |
| RHOH     | chr4 | 40237731 | G     | A  | --     | --    | Intron          | SNP | 0.633 | 18 | 31 |
| RBM47    | chr4 | 40459391 | G     | C  | --     | --    | Intron          | SNP | 0.524 | 10 | 11 |
| RBM47    | chr4 | 40556131 | A     | G  | --     | --    | Intron          | SNP | 0.479 | 38 | 35 |
| --       | chr4 | 40649244 | GAGAA | -  | --     | --    | IGR             | DEL | 0.188 | 13 | 3  |
| --       | chr4 | 40718982 | C     | A  | --     | --    | IGR             | SNP | 0.714 | 10 | 25 |
| APBB2    | chr4 | 41019147 | C     | G  | --     | --    | Intron          | SNP | 0.250 | 33 | 11 |
| --       | chr4 | 41966304 | G     | C  | --     | --    | IGR             | SNP | 0.733 | 8  | 22 |
| SLC30A9  | chr4 | 42078510 | G     | C  | --     | --    | Intron          | SNP | 0.395 | 26 | 17 |
| BEND4    | chr4 | 42149498 | C     | T  | --     | --    | Intron          | SNP | 0.156 | 27 | 5  |
| GRXCR1   | chr4 | 43004042 | A     | G  | --     | --    | Intron          | SNP | 0.139 | 31 | 5  |
| --       | chr4 | 43193989 | G     | A  | --     | --    | IGR             | SNP | 0.333 | 14 | 7  |
| --       | chr4 | 43307163 | T     | A  | --     | --    | IGR             | SNP | 0.359 | 25 | 14 |
| --       | chr4 | 43603500 | T     | A  | --     | --    | IGR             | SNP | 0.263 | 14 | 5  |
| --       | chr4 | 43724679 | G     | T  | --     | --    | IGR             | SNP | 0.125 | 28 | 4  |
| --       | chr4 | 43811442 | T     | C  | --     | --    | IGR             | SNP | 0.258 | 23 | 8  |
| --       | chr4 | 43847623 | T     | A  | --     | --    | IGR             | SNP | 0.607 | 11 | 17 |
| --       | chr4 | 43922242 | G     | C  | --     | --    | IGR             | SNP | 0.563 | 14 | 18 |
| --       | chr4 | 44007671 | -     | CT | --     | --    | IGR             | INS | 0.316 | 26 | 12 |
| --       | chr4 | 44044428 | A     | C  | --     | --    | IGR             | SNP | 0.393 | 17 | 11 |
| --       | chr4 | 44082432 | T     | A  | --     | --    | IGR             | SNP | 0.268 | 30 | 11 |
| KCTD8    | chr4 | 44184767 | -     | TC | --     | --    | Intron          | INS | 0.125 | 21 | 3  |
| KCTD8    | chr4 | 44348168 | A     | T  | --     | --    | Intron          | SNP | 0.263 | 14 | 5  |
| KCTD8    | chr4 | 44352006 | C     | G  | --     | --    | Intron          | SNP | 0.452 | 17 | 14 |
| KCTD8    | chr4 | 44419141 | C     | A  | --     | --    | Intron          | SNP | 0.361 | 23 | 13 |
| --       | chr4 | 44475444 | G     | C  | --     | --    | IGR             | SNP | 0.214 | 33 | 9  |
| --       | chr4 | 44527054 | G     | T  | --     | --    | IGR             | SNP | 0.278 | 26 | 10 |
| --       | chr4 | 44561361 | G     | A  | --     | --    | IGR             | SNP | 0.172 | 24 | 5  |
| YIPF7    | chr4 | 44626264 | A     | T  | --     | --    | Intron          | SNP | 0.409 | 13 | 9  |
| --       | chr4 | 44883835 | A     | G  | --     | --    | IGR             | SNP | 0.308 | 9  | 4  |
| --       | chr4 | 45146991 | C     | T  | --     | --    | IGR             | SNP | 0.385 | 16 | 10 |
| --       | chr4 | 45162072 | C     | T  | --     | --    | IGR             | SNP | 0.333 | 22 | 11 |
| --       | chr4 | 45585364 | T     | C  | --     | --    | IGR             | SNP | 0.170 | 39 | 8  |
| --       | chr4 | 45626252 | G     | T  | --     | --    | IGR             | SNP | 0.216 | 29 | 8  |
| --       | chr4 | 45727008 | C     | A  | --     | --    | IGR             | SNP | 0.469 | 17 | 15 |
| GABRG1   | chr4 | 46041586 | A     | G  | --     | --    | 3'UTR           | SNP | 0.186 | 35 | 8  |
| --       | chr4 | 46152293 | A     | C  | --     | --    | IGR             | SNP | 0.244 | 34 | 11 |
| --       | chr4 | 46165170 | G     | A  | --     | --    | IGR             | SNP | 0.194 | 25 | 6  |
| --       | chr4 | 46688930 | C     | A  | --     | --    | IGR             | SNP | 0.571 | 15 | 20 |
| COX7B2   | chr4 | 46791354 | C     | G  | --     | --    | Intron          | SNP | 0.357 | 18 | 10 |
| COX7B2   | chr4 | 46849886 | G     | C  | --     | --    | Intron          | SNP | 0.286 | 15 | 6  |
| GABRA4   | chr4 | 46979293 | A     | G  | --     | --    | Intron          | SNP | 0.185 | 22 | 5  |
| GABRB1   | chr4 | 47144845 | G     | T  | --     | --    | Intron          | SNP | 0.533 | 21 | 24 |
| GABRB1   | chr4 | 47155775 | T     | A  | --     | --    | Intron          | SNP | 0.262 | 31 | 11 |
| GABRB1   | chr4 | 47155776 | C     | A  | --     | --    | Intron          | SNP | 0.262 | 31 | 11 |
| CORIN    | chr4 | 47684481 | G     | A  | --     | --    | Intron          | SNP | 0.150 | 17 | 3  |
| --       | chr4 | 48439291 | T     | C  | --     | --    | IGR             | SNP | 0.158 | 16 | 3  |
| FRYL     | chr4 | 48507460 | T     | A  | --     | --    | Intron          | SNP | 0.326 | 29 | 14 |
| FRYL     | chr4 | 48526066 | G     | T  | --     | --    | Intron          | SNP | 0.438 | 18 | 14 |
| CWH43    | chr4 | 49009254 | T     | A  | T1097A | F366Y | Missense_mutati | SNP | 0.238 | 32 | 10 |
| --       | chr4 | 49134411 | C     | A  | --     | --    | IGR             | SNP | 0.476 | 11 | 10 |
| --       | chr4 | 49134502 | C     | A  | --     | --    | IGR             | SNP | 0.400 | 6  | 4  |

|            |      |          |       |    |       |       |        |     |       |    |    |
|------------|------|----------|-------|----|-------|-------|--------|-----|-------|----|----|
| --         | chr4 | 49144820 | A     | C  | --    | --    | IGR    | SNP | 0.125 | 21 | 3  |
| --         | chr4 | 49168277 | A     | G  | --    | --    | IGR    | SNP | 0.145 | 65 | 11 |
| --         | chr4 | 49186572 | T     | A  | --    | --    | IGR    | SNP | 0.200 | 20 | 5  |
| --         | chr4 | 49188991 | G     | A  | --    | --    | IGR    | SNP | 0.238 | 16 | 5  |
| --         | chr4 | 49194966 | ATCT  | -  | --    | --    | IGR    | DEL | 0.163 | 41 | 8  |
| --         | chr4 | 49203657 | C     | T  | --    | --    | IGR    | SNP | 0.105 | 51 | 6  |
| --         | chr4 | 49207425 | G     | T  | --    | --    | IGR    | SNP | 0.116 | 61 | 8  |
| --         | chr4 | 49229115 | G     | C  | --    | --    | IGR    | SNP | 0.209 | 34 | 9  |
| --         | chr4 | 49230262 | -     | TC | --    | --    | IGR    | INS | 0.125 | 14 | 2  |
| --         | chr4 | 49232189 | T     | A  | --    | --    | IGR    | SNP | 0.139 | 31 | 5  |
| --         | chr4 | 49241427 | G     | A  | --    | --    | IGR    | SNP | 0.146 | 35 | 6  |
| --         | chr4 | 49311479 | G     | T  | --    | --    | IGR    | SNP | 0.143 | 30 | 5  |
| --         | chr4 | 49320772 | T     | C  | --    | --    | IGR    | SNP | 0.300 | 14 | 6  |
| --         | chr4 | 49499702 | T     | G  | --    | --    | IGR    | SNP | 0.167 | 20 | 4  |
| --         | chr4 | 49499703 | C     | T  | --    | --    | IGR    | SNP | 0.167 | 20 | 4  |
| --         | chr4 | 49499902 | GT    | -  | --    | --    | IGR    | DEL | 0.176 | 28 | 6  |
| --         | chr4 | 49499935 | C     | G  | --    | --    | IGR    | SNP | 0.222 | 21 | 6  |
| --         | chr4 | 49509375 | C     | T  | --    | --    | IGR    | SNP | 0.714 | 6  | 15 |
| --         | chr4 | 49518391 | T     | C  | --    | --    | IGR    | SNP | 0.111 | 40 | 5  |
| --         | chr4 | 49518414 | T     | G  | --    | --    | IGR    | SNP | 0.122 | 36 | 5  |
| --         | chr4 | 49518448 | G     | T  | --    | --    | IGR    | SNP | 0.125 | 35 | 5  |
| --         | chr4 | 49532198 | C     | A  | --    | --    | IGR    | SNP | 0.152 | 28 | 5  |
| --         | chr4 | 49533290 | G     | A  | --    | --    | IGR    | SNP | 0.194 | 29 | 7  |
| --         | chr4 | 49540013 | C     | A  | --    | --    | IGR    | SNP | 0.160 | 21 | 4  |
| --         | chr4 | 49540349 | C     | A  | --    | --    | IGR    | SNP | 0.184 | 62 | 14 |
| --         | chr4 | 49555772 | T     | C  | --    | --    | IGR    | SNP | 0.273 | 16 | 6  |
| --         | chr4 | 49555810 | C     | A  | --    | --    | IGR    | SNP | 0.231 | 20 | 6  |
| --         | chr4 | 49558641 | A     | G  | --    | --    | IGR    | SNP | 0.147 | 29 | 5  |
| --         | chr4 | 49562070 | C     | A  | --    | --    | IGR    | SNP | 0.141 | 61 | 10 |
| --         | chr4 | 49562363 | G     | A  | --    | --    | IGR    | SNP | 0.149 | 63 | 11 |
| --         | chr4 | 49587975 | G     | A  | --    | --    | IGR    | SNP | 0.294 | 12 | 5  |
| --         | chr4 | 49588041 | GTTGT | -  | --    | --    | IGR    | DEL | 0.235 | 13 | 4  |
| --         | chr4 | 49588613 | C     | A  | --    | --    | IGR    | SNP | 0.300 | 14 | 6  |
| --         | chr4 | 49588646 | G     | A  | --    | --    | IGR    | SNP | 0.222 | 14 | 4  |
| --         | chr4 | 49602363 | T     | A  | --    | --    | IGR    | SNP | 0.102 | 44 | 5  |
| --         | chr4 | 49605755 | G     | A  | --    | --    | IGR    | SNP | 0.106 | 42 | 5  |
| --         | chr4 | 49613282 | T     | C  | --    | --    | IGR    | SNP | 0.163 | 41 | 8  |
| --         | chr4 | 49613283 | G     | A  | --    | --    | IGR    | SNP | 0.143 | 42 | 7  |
| --         | chr4 | 49614368 | C     | T  | --    | --    | IGR    | SNP | 0.163 | 36 | 7  |
| --         | chr4 | 49614592 | G     | T  | --    | --    | IGR    | SNP | 0.133 | 39 | 6  |
| --         | chr4 | 49617599 | G     | T  | --    | --    | IGR    | SNP | 0.129 | 27 | 4  |
| --         | chr4 | 49618699 | A     | G  | --    | --    | IGR    | SNP | 0.138 | 50 | 8  |
| --         | chr4 | 49618850 | C     | T  | --    | --    | IGR    | SNP | 0.184 | 40 | 9  |
| --         | chr4 | 49623640 | T     | A  | --    | --    | IGR    | SNP | 0.500 | 3  | 3  |
| --         | chr4 | 49627906 | A     | T  | --    | --    | IGR    | SNP | 0.235 | 13 | 4  |
| --         | chr4 | 49630621 | TA    | -  | --    | --    | IGR    | DEL | 0.133 | 13 | 2  |
| --         | chr4 | 49630786 | C     | T  | --    | --    | IGR    | SNP | 0.154 | 22 | 4  |
| --         | chr4 | 49635183 | A     | T  | --    | --    | IGR    | SNP | 0.107 | 25 | 3  |
| --         | chr4 | 49649978 | G     | T  | --    | --    | IGR    | SNP | 0.172 | 24 | 5  |
| DCUN1D4    | chr4 | 52738867 | A     | G  | --    | --    | Intron | SNP | 0.187 | 61 | 14 |
| --         | chr4 | 52804653 | C     | T  | --    | --    | IGR    | SNP | 0.136 | 19 | 3  |
| --         | chr4 | 52804665 | G     | C  | --    | --    | IGR    | SNP | 0.136 | 19 | 3  |
| --         | chr4 | 52804898 | C     | A  | --    | --    | IGR    | SNP | 0.136 | 19 | 3  |
| --         | chr4 | 53070831 | G     | C  | --    | --    | IGR    | SNP | 0.509 | 28 | 29 |
| --         | chr4 | 53340123 | T     | A  | --    | --    | IGR    | SNP | 0.235 | 39 | 12 |
| --         | chr4 | 53396734 | A     | T  | --    | --    | IGR    | SNP | 0.462 | 28 | 24 |
| ERVMER34-1 | chr4 | 53616386 | G     | A  | --    | --    | Intron | SNP | 0.308 | 36 | 16 |
| SCFD2      | chr4 | 53863345 | T     | A  | --    | --    | Intron | SNP | 0.190 | 51 | 12 |
| SCFD2      | chr4 | 54022014 | T     | C  | --    | --    | Intron | SNP | 0.489 | 24 | 23 |
| SCFD2      | chr4 | 54084250 | C     | G  | --    | --    | Intron | SNP | 0.520 | 12 | 13 |
| --         | chr4 | 54591765 | C     | T  | --    | --    | IGR    | SNP | 0.158 | 16 | 3  |
| --         | chr4 | 54591785 | C     | G  | --    | --    | IGR    | SNP | 0.200 | 12 | 3  |
| --         | chr4 | 54869938 | T     | G  | --    | --    | IGR    | SNP | 0.237 | 29 | 9  |
| CHIC2      | chr4 | 54889917 | T     | A  | --    | --    | Intron | SNP | 0.141 | 73 | 12 |
| --         | chr4 | 55024720 | G     | A  | --    | --    | IGR    | SNP | 0.154 | 22 | 4  |
| --         | chr4 | 55058305 | A     | G  | --    | --    | IGR    | SNP | 0.414 | 17 | 12 |
| PDGFRA     | chr4 | 55143979 | G     | T  | --    | --    | Intron | SNP | 0.259 | 40 | 14 |
| --         | chr4 | 55372189 | C     | T  | --    | --    | IGR    | SNP | 0.309 | 47 | 21 |
| --         | chr4 | 55451417 | G     | A  | --    | --    | IGR    | SNP | 0.488 | 44 | 42 |
| --         | chr4 | 56140222 | T     | C  | --    | --    | IGR    | SNP | 0.468 | 33 | 29 |
| SRD5A3     | chr4 | 56230232 | G     | C  | --    | --    | Intron | SNP | 0.495 | 52 | 51 |
| SRD5A3     | chr4 | 56230410 | G     | C  | G534C | L178L | Silent | SNP | 0.463 | 44 | 38 |
| SRD5A3     | chr4 | 56231258 | G     | C  | --    | --    | Intron | SNP | 0.536 | 32 | 37 |
| NMU        | chr4 | 56473269 | A     | G  | --    | --    | Intron | SNP | 0.300 | 35 | 15 |
| --         | chr4 | 56677413 | G     | T  | --    | --    | IGR    | SNP | 0.111 | 32 | 4  |
| KIAA1211   | chr4 | 57144774 | C     | A  | --    | --    | Intron | SNP | 0.160 | 42 | 8  |
| --         | chr4 | 57201462 | AG    | -  | --    | --    | IGR    | DEL | 0.133 | 13 | 2  |
| --         | chr4 | 57410065 | T     | A  | --    | --    | IGR    | SNP | 0.357 | 18 | 10 |
| --         | chr4 | 57612073 | T     | G  | --    | --    | IGR    | SNP | 0.206 | 27 | 7  |
| LOC255130  | chr4 | 58038744 | C     | G  | --    | --    | RNA    | SNP | 0.257 | 26 | 9  |

|       |      |          |     |      |    |    |        |     |       |    |    |
|-------|------|----------|-----|------|----|----|--------|-----|-------|----|----|
| --    | chr4 | 58126524 | C   | G    | -- | -- | IGR    | SNP | 0.263 | 28 | 10 |
| --    | chr4 | 58213125 | C   | T    | -- | -- | IGR    | SNP | 0.190 | 34 | 8  |
| --    | chr4 | 58384917 | G   | T    | -- | -- | IGR    | SNP | 0.130 | 20 | 3  |
| --    | chr4 | 58472529 | C   | T    | -- | -- | IGR    | SNP | 0.434 | 30 | 23 |
| --    | chr4 | 58519640 | -   | TTTA | -- | -- | IGR    | INS | 0.439 | 23 | 18 |
| --    | chr4 | 58660844 | G   | A    | -- | -- | IGR    | SNP | 0.353 | 33 | 18 |
| --    | chr4 | 58726478 | A   | C    | -- | -- | IGR    | SNP | 0.155 | 49 | 9  |
| --    | chr4 | 58806537 | C   | T    | -- | -- | IGR    | SNP | 0.207 | 23 | 6  |
| --    | chr4 | 58883341 | C   | A    | -- | -- | IGR    | SNP | 0.229 | 27 | 8  |
| --    | chr4 | 58900604 | C   | T    | -- | -- | IGR    | SNP | 0.368 | 24 | 14 |
| --    | chr4 | 59159720 | A   | T    | -- | -- | IGR    | SNP | 0.500 | 32 | 32 |
| --    | chr4 | 59168571 | C   | A    | -- | -- | IGR    | SNP | 0.300 | 14 | 6  |
| --    | chr4 | 59178874 | C   | A    | -- | -- | IGR    | SNP | 0.250 | 27 | 9  |
| --    | chr4 | 59259743 | G   | T    | -- | -- | IGR    | SNP | 0.235 | 13 | 4  |
| --    | chr4 | 59299590 | G   | A    | -- | -- | IGR    | SNP | 0.406 | 19 | 13 |
| --    | chr4 | 59697983 | A   | T    | -- | -- | IGR    | SNP | 0.222 | 42 | 12 |
| --    | chr4 | 59722544 | T   | G    | -- | -- | IGR    | SNP | 0.333 | 12 | 6  |
| --    | chr4 | 59824446 | -   | CAT  | -- | -- | IGR    | INS | 0.143 | 12 | 2  |
| --    | chr4 | 59889413 | T   | A    | -- | -- | IGR    | SNP | 0.404 | 31 | 21 |
| --    | chr4 | 59892033 | C   | A    | -- | -- | IGR    | SNP | 0.109 | 49 | 6  |
| --    | chr4 | 59892065 | A   | T    | -- | -- | IGR    | SNP | 0.137 | 44 | 7  |
| --    | chr4 | 60011328 | C   | A    | -- | -- | IGR    | SNP | 0.137 | 44 | 7  |
| --    | chr4 | 60093381 | T   | A    | -- | -- | IGR    | SNP | 0.220 | 32 | 9  |
| --    | chr4 | 60199323 | G   | A    | -- | -- | IGR    | SNP | 0.240 | 19 | 6  |
| --    | chr4 | 60211480 | A   | T    | -- | -- | IGR    | SNP | 0.554 | 29 | 36 |
| --    | chr4 | 60442910 | C   | G    | -- | -- | IGR    | SNP | 0.269 | 38 | 14 |
| --    | chr4 | 60884738 | C   | A    | -- | -- | IGR    | SNP | 0.222 | 21 | 6  |
| --    | chr4 | 61004648 | T   | C    | -- | -- | IGR    | SNP | 0.200 | 16 | 4  |
| --    | chr4 | 61047822 | A   | T    | -- | -- | IGR    | SNP | 0.156 | 27 | 5  |
| --    | chr4 | 61126571 | T   | C    | -- | -- | IGR    | SNP | 0.462 | 35 | 30 |
| --    | chr4 | 61250501 | C   | G    | -- | -- | IGR    | SNP | 0.500 | 10 | 10 |
| --    | chr4 | 61278024 | G   | A    | -- | -- | IGR    | SNP | 0.333 | 18 | 9  |
| --    | chr4 | 61288758 | C   | T    | -- | -- | IGR    | SNP | 0.778 | 6  | 21 |
| --    | chr4 | 61748101 | C   | A    | -- | -- | IGR    | SNP | 0.343 | 23 | 12 |
| --    | chr4 | 61755796 | T   | A    | -- | -- | IGR    | SNP | 0.870 | 3  | 20 |
| --    | chr4 | 61802567 | T   | C    | -- | -- | IGR    | SNP | 0.370 | 17 | 10 |
| --    | chr4 | 62201212 | T   | A    | -- | -- | IGR    | SNP | 0.952 | 1  | 20 |
| --    | chr4 | 62201239 | A   | T    | -- | -- | IGR    | SNP | 0.958 | 1  | 23 |
| --    | chr4 | 62333208 | TGA | -    | -- | -- | IGR    | DEL | 0.129 | 27 | 4  |
| LPHN3 | chr4 | 62612685 | T   | G    | -- | -- | Intron | SNP | 0.846 | 2  | 11 |
| LPHN3 | chr4 | 62779248 | G   | T    | -- | -- | Intron | SNP | 0.857 | 4  | 24 |
| --    | chr4 | 62975097 | A   | T    | -- | -- | IGR    | SNP | 0.111 | 32 | 4  |
| --    | chr4 | 62996607 | G   | T    | -- | -- | IGR    | SNP | 0.854 | 6  | 35 |
| --    | chr4 | 63122604 | C   | G    | -- | -- | IGR    | SNP | 0.880 | 3  | 22 |
| --    | chr4 | 63139460 | C   | G    | -- | -- | IGR    | SNP | 0.875 | 3  | 21 |
| --    | chr4 | 63201658 | C   | T    | -- | -- | IGR    | SNP | 0.840 | 4  | 21 |
| --    | chr4 | 63351634 | T   | C    | -- | -- | IGR    | SNP | 0.941 | 1  | 16 |
| --    | chr4 | 63447846 | C   | A    | -- | -- | IGR    | SNP | 0.538 | 6  | 7  |
| --    | chr4 | 63471475 | T   | C    | -- | -- | IGR    | SNP | 0.429 | 4  | 3  |
| --    | chr4 | 63540288 | T   | G    | -- | -- | IGR    | SNP | 0.885 | 3  | 23 |
| --    | chr4 | 63612837 | A   | C    | -- | -- | IGR    | SNP | 0.550 | 9  | 11 |
| --    | chr4 | 63649365 | G   | A    | -- | -- | IGR    | SNP | 0.440 | 14 | 11 |
| --    | chr4 | 63680865 | T   | C    | -- | -- | IGR    | SNP | 0.333 | 16 | 8  |
| --    | chr4 | 63752499 | A   | T    | -- | -- | IGR    | SNP | 0.930 | 3  | 40 |
| --    | chr4 | 63807170 | T   | C    | -- | -- | IGR    | SNP | 0.150 | 17 | 3  |
| --    | chr4 | 63807387 | C   | G    | -- | -- | IGR    | SNP | 0.100 | 27 | 3  |
| --    | chr4 | 63839103 | T   | A    | -- | -- | IGR    | SNP | 0.292 | 17 | 7  |
| --    | chr4 | 63964122 | G   | C    | -- | -- | IGR    | SNP | 0.391 | 14 | 9  |
| --    | chr4 | 64045924 | C   | A    | -- | -- | IGR    | SNP | 0.222 | 21 | 6  |
| --    | chr4 | 64054215 | C   | A    | -- | -- | IGR    | SNP | 0.179 | 46 | 10 |
| --    | chr4 | 64061021 | G   | C    | -- | -- | IGR    | SNP | 0.406 | 38 | 26 |
| --    | chr4 | 64122513 | C   | G    | -- | -- | IGR    | SNP | 0.195 | 33 | 8  |
| --    | chr4 | 64141022 | C   | A    | -- | -- | IGR    | SNP | 0.179 | 46 | 10 |
| --    | chr4 | 64183385 | A   | G    | -- | -- | IGR    | SNP | 0.476 | 11 | 10 |
| --    | chr4 | 64289039 | C   | A    | -- | -- | IGR    | SNP | 0.667 | 2  | 4  |
| --    | chr4 | 64324988 | G   | A    | -- | -- | IGR    | SNP | 0.167 | 40 | 8  |
| --    | chr4 | 64327112 | T   | A    | -- | -- | IGR    | SNP | 0.244 | 34 | 11 |
| --    | chr4 | 64329492 | T   | A    | -- | -- | IGR    | SNP | 0.515 | 16 | 17 |
| --    | chr4 | 64377165 | G   | A    | -- | -- | IGR    | SNP | 0.129 | 27 | 4  |
| --    | chr4 | 64547235 | T   | G    | -- | -- | IGR    | SNP | 0.629 | 13 | 22 |
| --    | chr4 | 64688816 | T   | G    | -- | -- | IGR    | SNP | 0.119 | 37 | 5  |
| --    | chr4 | 64847674 | C   | T    | -- | -- | IGR    | SNP | 0.458 | 32 | 27 |
| --    | chr4 | 64881533 | A   | T    | -- | -- | IGR    | SNP | 0.146 | 41 | 7  |
| TECRL | chr4 | 65153248 | G   | A    | -- | -- | Intron | SNP | 0.105 | 34 | 4  |
| TECRL | chr4 | 65212718 | G   | C    | -- | -- | Intron | SNP | 0.385 | 40 | 25 |
| TECRL | chr4 | 65269955 | C   | A    | -- | -- | Intron | SNP | 0.200 | 12 | 3  |
| --    | chr4 | 65294853 | A   | T    | -- | -- | IGR    | SNP | 0.277 | 34 | 13 |
| --    | chr4 | 65342808 | T   | A    | -- | -- | IGR    | SNP | 0.519 | 13 | 14 |
| --    | chr4 | 65441507 | A   | T    | -- | -- | IGR    | SNP | 0.373 | 32 | 19 |
| --    | chr4 | 65618067 | -   | AAT  | -- | -- | IGR    | INS | 0.174 | 19 | 4  |

|             |      |          |     |   |    |    |         |     |       |     |    |
|-------------|------|----------|-----|---|----|----|---------|-----|-------|-----|----|
| --          | chr4 | 65657027 | C   | T | -- | -- | IGR     | SNP | 0.231 | 50  | 15 |
| --          | chr4 | 65737991 | G   | C | -- | -- | IGR     | SNP | 0.396 | 29  | 19 |
| LOC401134   | chr4 | 65825395 | T   | C | -- | -- | RNA     | SNP | 0.273 | 40  | 15 |
| --          | chr4 | 66016643 | CT  | - | -- | -- | IGR     | DEL | 0.188 | 26  | 6  |
| --          | chr4 | 66144395 | C   | A | -- | -- | IGR     | SNP | 0.415 | 24  | 17 |
| EPHA5       | chr4 | 66386010 | C   | T | -- | -- | Intron  | SNP | 0.125 | 21  | 3  |
| LOC1001446C | chr4 | 66538133 | C   | A | -- | -- | RNA     | SNP | 0.267 | 11  | 4  |
| --          | chr4 | 66617209 | T   | C | -- | -- | IGR     | SNP | 0.125 | 28  | 4  |
| --          | chr4 | 66806720 | G   | A | -- | -- | IGR     | SNP | 0.500 | 7   | 7  |
| --          | chr4 | 66836444 | C   | T | -- | -- | IGR     | SNP | 0.211 | 30  | 8  |
| --          | chr4 | 67157670 | A   | C | -- | -- | IGR     | SNP | 0.138 | 56  | 9  |
| --          | chr4 | 67304811 | T   | A | -- | -- | IGR     | SNP | 0.521 | 35  | 38 |
| --          | chr4 | 67314436 | G   | T | -- | -- | IGR     | SNP | 0.197 | 49  | 12 |
| --          | chr4 | 67326422 | T   | A | -- | -- | IGR     | SNP | 0.511 | 22  | 23 |
| --          | chr4 | 67482868 | T   | A | -- | -- | IGR     | SNP | 0.413 | 27  | 19 |
| --          | chr4 | 67500236 | G   | T | -- | -- | IGR     | SNP | 0.468 | 25  | 22 |
| --          | chr4 | 67928558 | A   | G | -- | -- | IGR     | SNP | 0.333 | 6   | 3  |
| --          | chr4 | 68057932 | T   | G | -- | -- | IGR     | SNP | 0.412 | 30  | 21 |
| --          | chr4 | 68163075 | T   | A | -- | -- | IGR     | SNP | 0.375 | 5   | 3  |
| --          | chr4 | 68595838 | G   | C | -- | -- | IGR     | SNP | 0.333 | 24  | 12 |
| TMPRSS11F   | chr4 | 68957862 | G   | C | -- | -- | Intron  | SNP | 0.549 | 23  | 28 |
| --          | chr4 | 69222764 | AT  | - | -- | -- | IGR     | DEL | 0.118 | 15  | 2  |
| TMPRSS11E   | chr4 | 69352865 | G   | T | -- | -- | Intron  | SNP | 0.220 | 32  | 9  |
| --          | chr4 | 69374867 | A   | G | -- | -- | IGR     | SNP | 0.182 | 27  | 6  |
| --          | chr4 | 69396055 | C   | G | -- | -- | IGR     | SNP | 0.455 | 6   | 5  |
| --          | chr4 | 69680470 | TC  | - | -- | -- | IGR     | DEL | 0.163 | 36  | 7  |
| --          | chr4 | 69699518 | A   | T | -- | -- | IGR     | SNP | 0.128 | 34  | 5  |
| --          | chr4 | 69887605 | G   | C | -- | -- | IGR     | SNP | 0.103 | 35  | 4  |
| --          | chr4 | 70124997 | T   | C | -- | -- | IGR     | SNP | 0.444 | 15  | 12 |
| --          | chr4 | 70215161 | T   | C | -- | -- | IGR     | SNP | 0.176 | 28  | 6  |
| --          | chr4 | 70277472 | C   | T | -- | -- | IGR     | SNP | 0.130 | 40  | 6  |
| --          | chr4 | 70589431 | G   | C | -- | -- | IGR     | SNP | 0.538 | 6   | 7  |
| --          | chr4 | 70691305 | C   | T | -- | -- | IGR     | SNP | 0.426 | 39  | 29 |
| CSN1S1      | chr4 | 70812221 | C   | G | -- | -- | 3'UTR   | SNP | 0.436 | 31  | 24 |
| --          | chr4 | 71162940 | A   | T | -- | -- | IGR     | SNP | 0.419 | 25  | 18 |
| --          | chr4 | 71191581 | G   | C | -- | -- | IGR     | SNP | 0.115 | 46  | 6  |
| --          | chr4 | 72011561 | C   | G | -- | -- | IGR     | SNP | 0.467 | 8   | 7  |
| SLC4A4      | chr4 | 72158352 | G   | T | -- | -- | Intron  | SNP | 0.439 | 32  | 25 |
| SLC4A4      | chr4 | 72217179 | A   | G | -- | -- | Intron  | SNP | 0.191 | 38  | 9  |
| SLC4A4      | chr4 | 72217180 | G   | T | -- | -- | Intron  | SNP | 0.182 | 36  | 8  |
| SLC4A4      | chr4 | 72373935 | A   | G | -- | -- | Intron  | SNP | 0.200 | 36  | 9  |
| --          | chr4 | 72583164 | T   | C | -- | -- | IGR     | SNP | 0.163 | 41  | 8  |
| --          | chr4 | 72850579 | C   | G | -- | -- | IGR     | SNP | 0.452 | 17  | 14 |
| NPFRR2      | chr4 | 72923944 | AT  | - | -- | -- | Intron  | DEL | 0.421 | 11  | 8  |
| ADAMTS3     | chr4 | 73147117 | C   | G | -- | -- | 3'UTR   | SNP | 0.746 | 16  | 47 |
| ADAMTS3     | chr4 | 73176739 | C   | T | -- | -- | Intron  | SNP | 0.105 | 85  | 10 |
| ADAMTS3     | chr4 | 73303460 | A   | G | -- | -- | Intron  | SNP | 0.111 | 56  | 7  |
| ADAMTS3     | chr4 | 73306783 | A   | T | -- | -- | Intron  | SNP | 0.185 | 53  | 12 |
| ADAMTS3     | chr4 | 73340152 | G   | C | -- | -- | Intron  | SNP | 0.647 | 24  | 44 |
| ADAMTS3     | chr4 | 73340232 | G   | T | -- | -- | Intron  | SNP | 0.692 | 16  | 36 |
| ADAMTS3     | chr4 | 73340243 | G   | C | -- | -- | Intron  | SNP | 0.682 | 14  | 30 |
| --          | chr4 | 73665268 | GA  | - | -- | -- | IGR     | DEL | 0.275 | 37  | 14 |
| --          | chr4 | 73700596 | G   | A | -- | -- | IGR     | SNP | 0.146 | 88  | 15 |
| --          | chr4 | 73758255 | C   | T | -- | -- | IGR     | SNP | 0.229 | 64  | 19 |
| --          | chr4 | 73801024 | T   | C | -- | -- | IGR     | SNP | 0.115 | 77  | 10 |
| AFP         | chr4 | 74304105 | GA  | - | -- | -- | Intron  | DEL | 0.545 | 30  | 36 |
| --          | chr4 | 74331109 | C   | A | -- | -- | IGR     | SNP | 0.118 | 60  | 8  |
| --          | chr4 | 74496766 | G   | A | -- | -- | IGR     | SNP | 0.764 | 17  | 55 |
| --          | chr4 | 74820177 | C   | T | -- | -- | IGR     | SNP | 0.648 | 25  | 46 |
| CXCL2       | chr4 | 74962071 | G   | T | -- | -- | 3'Flank | SNP | 0.157 | 70  | 13 |
| --          | chr4 | 75577660 | A   | T | -- | -- | IGR     | SNP | 0.129 | 27  | 4  |
| --          | chr4 | 75744668 | GTA | - | -- | -- | IGR     | DEL | 0.125 | 49  | 7  |
| PARM1       | chr4 | 75884041 | T   | G | -- | -- | Intron  | SNP | 0.145 | 59  | 10 |
| --          | chr4 | 76015205 | C   | A | -- | -- | IGR     | SNP | 0.190 | 68  | 16 |
| --          | chr4 | 76070283 | A   | T | -- | -- | IGR     | SNP | 0.140 | 43  | 7  |
| --          | chr4 | 76078222 | C   | T | -- | -- | IGR     | SNP | 0.125 | 63  | 9  |
| --          | chr4 | 76200286 | T   | C | -- | -- | IGR     | SNP | 0.171 | 29  | 6  |
| --          | chr4 | 76209152 | T   | C | -- | -- | IGR     | SNP | 0.171 | 68  | 14 |
| --          | chr4 | 76744785 | G   | A | -- | -- | IGR     | SNP | 0.215 | 84  | 23 |
| PPEF2       | chr4 | 76796350 | G   | A | -- | -- | Intron  | SNP | 0.136 | 51  | 8  |
| ART3        | chr4 | 77014531 | C   | T | -- | -- | Intron  | SNP | 0.310 | 69  | 31 |
| CCDC158     | chr4 | 77258202 | C   | T | -- | -- | Intron  | SNP | 0.216 | 69  | 19 |
| SHROOM3     | chr4 | 77663103 | G   | T | -- | -- | Intron  | SNP | 0.111 | 104 | 13 |
| 11-Sep      | chr4 | 77871488 | G   | T | -- | -- | Intron  | SNP | 0.190 | 85  | 20 |
| CXCL13      | chr4 | 78434013 | G   | C | -- | -- | Intron  | SNP | 0.197 | 61  | 15 |
| --          | chr4 | 78577895 | C   | A | -- | -- | IGR     | SNP | 0.188 | 78  | 18 |
| CNOT6L      | chr4 | 78661755 | C   | G | -- | -- | Intron  | SNP | 0.357 | 54  | 30 |
| --          | chr4 | 78748882 | A   | T | -- | -- | IGR     | SNP | 0.105 | 85  | 10 |
| MRPL1       | chr4 | 78793595 | T   | C | -- | -- | Intron  | SNP | 0.141 | 61  | 10 |
| MRPL1       | chr4 | 78796175 | C   | T | -- | -- | Intron  | SNP | 0.346 | 34  | 18 |

|             |      |          |     |       |       |       |                 |     |       |     |    |
|-------------|------|----------|-----|-------|-------|-------|-----------------|-----|-------|-----|----|
| --          | chr4 | 78896142 | G   | A     | --    | --    | IGR             | SNP | 0.187 | 61  | 14 |
| --          | chr4 | 78904531 | A   | C     | --    | --    | IGR             | SNP | 0.130 | 47  | 7  |
| FRAS1       | chr4 | 79421853 | C   | T     | --    | --    | Intron          | SNP | 0.560 | 33  | 42 |
| BMP2K       | chr4 | 79698024 | G   | C     | --    | --    | Intron          | SNP | 0.176 | 28  | 6  |
| --          | chr4 | 79870527 | C   | G     | --    | --    | IGR             | SNP | 0.146 | 70  | 12 |
| LOC10050587 | chr4 | 80171323 | G   | C     | --    | --    | RNA             | SNP | 0.259 | 60  | 21 |
| --          | chr4 | 80272492 | T   | G     | --    | --    | IGR             | SNP | 0.328 | 45  | 22 |
| --          | chr4 | 80297868 | G   | C     | --    | --    | IGR             | SNP | 0.350 | 39  | 21 |
| --          | chr4 | 80319039 | T   | A     | --    | --    | IGR             | SNP | 0.152 | 67  | 12 |
| --          | chr4 | 80815046 | A   | G     | --    | --    | IGR             | SNP | 0.125 | 63  | 9  |
| --          | chr4 | 81015895 | T   | A     | --    | --    | IGR             | SNP | 0.141 | 55  | 9  |
| PRDM8       | chr4 | 81123364 | G   | A     | G748A | A250T | Missense_mutati | SNP | 0.141 | 55  | 9  |
| C4orf22     | chr4 | 81545020 | T   | G     | --    | --    | Intron          | SNP | 0.103 | 104 | 12 |
| C4orf22     | chr4 | 81666355 | T   | C     | --    | --    | Intron          | SNP | 0.116 | 76  | 10 |
| PRKG2       | chr4 | 82060860 | C   | T     | --    | --    | Intron          | SNP | 0.161 | 47  | 9  |
| --          | chr4 | 82454254 | G   | A     | --    | --    | IGR             | SNP | 0.603 | 25  | 38 |
| --          | chr4 | 82487536 | T   | A     | --    | --    | IGR             | SNP | 0.138 | 56  | 9  |
| --          | chr4 | 82507376 | T   | A     | --    | --    | IGR             | SNP | 0.125 | 70  | 10 |
| --          | chr4 | 82551409 | C   | T     | --    | --    | IGR             | SNP | 0.188 | 39  | 9  |
| --          | chr4 | 82559725 | C   | T     | --    | --    | IGR             | SNP | 0.174 | 71  | 15 |
| --          | chr4 | 82582447 | G   | T     | --    | --    | IGR             | SNP | 0.619 | 32  | 52 |
| --          | chr4 | 82669431 | C   | T     | --    | --    | IGR             | SNP | 0.105 | 94  | 11 |
| --          | chr4 | 82858374 | G   | A     | --    | --    | IGR             | SNP | 0.387 | 19  | 12 |
| --          | chr4 | 82886188 | C   | A     | --    | --    | IGR             | SNP | 0.480 | 13  | 12 |
| THAP9       | chr4 | 83837054 | CTG | -     | --    | --    | Intron          | DEL | 0.103 | 26  | 3  |
| --          | chr4 | 84176454 | C   | G     | --    | --    | IGR             | SNP | 0.900 | 2   | 18 |
| --          | chr4 | 84306173 | G   | T     | --    | --    | IGR             | SNP | 0.333 | 24  | 12 |
| --          | chr4 | 84311933 | -   | AG    | --    | --    | IGR             | INS | 0.778 | 12  | 42 |
| --          | chr4 | 84584185 | C   | A     | --    | --    | IGR             | SNP | 0.893 | 3   | 25 |
| WDFY3       | chr4 | 85884602 | G   | A     | --    | --    | Intron          | SNP | 0.278 | 13  | 5  |
| WDFY3-AS2   | chr4 | 85910512 | C   | T     | --    | --    | RNA             | SNP | 0.375 | 10  | 6  |
| WDFY3-AS2   | chr4 | 85910518 | C   | T     | --    | --    | RNA             | SNP | 0.375 | 10  | 6  |
| --          | chr4 | 86202311 | C   | A     | --    | --    | IGR             | SNP | 0.643 | 5   | 9  |
| --          | chr4 | 86324868 | T   | A     | --    | --    | IGR             | SNP | 0.200 | 12  | 3  |
| --          | chr4 | 86342108 | C   | T     | --    | --    | IGR             | SNP | 0.556 | 8   | 10 |
| --          | chr4 | 86357223 | CAG | -     | --    | --    | IGR             | DEL | 0.143 | 12  | 2  |
| ARHGAP24    | chr4 | 86633492 | C   | A     | --    | --    | Intron          | SNP | 0.250 | 9   | 3  |
| SLC10A6     | chr4 | 87745527 | G   | A     | --    | --    | Intron          | SNP | 0.157 | 59  | 11 |
| --          | chr4 | 87783014 | C   | A     | --    | --    | IGR             | SNP | 0.129 | 27  | 4  |
| --          | chr4 | 87783016 | T   | C     | --    | --    | IGR             | SNP | 0.129 | 27  | 4  |
| AFF1        | chr4 | 87955171 | G   | A     | --    | --    | Intron          | SNP | 0.775 | 23  | 79 |
| KLHL8       | chr4 | 88084521 | C   | T     | --    | --    | 3'UTR           | SNP | 0.775 | 16  | 55 |
| HSD17B11    | chr4 | 88282191 | C   | A     | --    | --    | Intron          | SNP | 0.149 | 63  | 11 |
| --          | chr4 | 88624439 | A   | C     | --    | --    | IGR             | SNP | 0.179 | 55  | 12 |
| --          | chr4 | 88702395 | A   | C     | --    | --    | IGR             | SNP | 0.125 | 56  | 8  |
| PKD2        | chr4 | 88931757 | A   | G     | --    | --    | Intron          | SNP | 0.794 | 13  | 50 |
| --          | chr4 | 89169175 | G   | C     | --    | --    | IGR             | SNP | 0.158 | 48  | 9  |
| FAM13A      | chr4 | 89865458 | A   | T     | --    | --    | Intron          | SNP | 0.110 | 73  | 9  |
| --          | chr4 | 90101504 | T   | A     | --    | --    | IGR             | SNP | 0.105 | 34  | 4  |
| --          | chr4 | 90521045 | A   | G     | --    | --    | IGR             | SNP | 0.101 | 80  | 9  |
| --          | chr4 | 90786009 | T   | A     | --    | --    | IGR             | SNP | 0.263 | 28  | 10 |
| --          | chr4 | 90786010 | A   | G     | --    | --    | IGR             | SNP | 0.111 | 32  | 4  |
| FAM190A     | chr4 | 91121177 | G   | A     | --    | --    | Intron          | SNP | 0.169 | 49  | 10 |
| FAM190A     | chr4 | 91225138 | C   | T     | --    | --    | Intron          | SNP | 0.133 | 26  | 4  |
| FAM190A     | chr4 | 91225162 | -   | CAAAA | --    | --    | Intron          | INS | 0.171 | 29  | 6  |
| FAM190A     | chr4 | 91225352 | A   | G     | --    | --    | Intron          | SNP | 0.158 | 16  | 3  |
| FAM190A     | chr4 | 91335840 | C   | T     | --    | --    | Intron          | SNP | 0.136 | 51  | 8  |
| FAM190A     | chr4 | 91347056 | G   | T     | --    | --    | Intron          | SNP | 0.175 | 47  | 10 |
| FAM190A     | chr4 | 91449044 | C   | A     | --    | --    | Intron          | SNP | 0.210 | 49  | 13 |
| FAM190A     | chr4 | 91477131 | A   | T     | --    | --    | Intron          | SNP | 0.324 | 48  | 23 |
| FAM190A     | chr4 | 91772547 | C   | A     | --    | --    | Intron          | SNP | 0.224 | 45  | 13 |
| FAM190A     | chr4 | 91904723 | T   | A     | --    | --    | Intron          | SNP | 0.145 | 53  | 9  |
| FAM190A     | chr4 | 91961717 | C   | A     | --    | --    | Intron          | SNP | 0.203 | 55  | 14 |
| --          | chr4 | 92681087 | T   | G     | --    | --    | IGR             | SNP | 0.276 | 42  | 16 |
| --          | chr4 | 92694368 | G   | T     | --    | --    | IGR             | SNP | 0.714 | 12  | 30 |
| --          | chr4 | 92734993 | G   | C     | --    | --    | IGR             | SNP | 0.439 | 37  | 29 |
| --          | chr4 | 92835362 | C   | A     | --    | --    | IGR             | SNP | 0.742 | 16  | 46 |
| --          | chr4 | 92874534 | T   | A     | --    | --    | IGR             | SNP | 0.189 | 43  | 10 |
| --          | chr4 | 92964997 | A   | T     | --    | --    | IGR             | SNP | 0.212 | 26  | 7  |
| --          | chr4 | 92993776 | A   | C     | --    | --    | IGR             | SNP | 0.264 | 64  | 23 |
| --          | chr4 | 93192983 | G   | A     | --    | --    | IGR             | SNP | 0.171 | 29  | 6  |
| --          | chr4 | 93194951 | C   | A     | --    | --    | IGR             | SNP | 0.123 | 50  | 7  |
| GRID2       | chr4 | 93224562 | A   | G     | --    | --    | 5'Flank         | SNP | 0.250 | 39  | 13 |
| GRID2       | chr4 | 93242385 | C   | T     | --    | --    | Intron          | SNP | 0.164 | 56  | 11 |
| GRID2       | chr4 | 93304871 | G   | A     | --    | --    | Intron          | SNP | 0.196 | 45  | 11 |
| GRID2       | chr4 | 93331984 | G   | A     | --    | --    | Intron          | SNP | 0.119 | 37  | 5  |
| GRID2       | chr4 | 93333092 | G   | A     | --    | --    | Intron          | SNP | 0.353 | 22  | 12 |
| GRID2       | chr4 | 93364441 | C   | A     | --    | --    | Intron          | SNP | 0.114 | 39  | 5  |
| GRID2       | chr4 | 93364442 | T   | A     | --    | --    | Intron          | SNP | 0.114 | 39  | 5  |
| GRID2       | chr4 | 93365827 | T   | C     | --    | --    | Intron          | SNP | 0.237 | 45  | 14 |

|             |      |           |     |    |    |    |         |     |       |    |    |
|-------------|------|-----------|-----|----|----|----|---------|-----|-------|----|----|
| GRID2       | chr4 | 93380513  | C   | G  | -- | -- | Intron  | SNP | 0.143 | 54 | 9  |
| GRID2       | chr4 | 94022974  | G   | T  | -- | -- | Intron  | SNP | 0.182 | 45 | 10 |
| GRID2       | chr4 | 94085420  | C   | T  | -- | -- | Intron  | SNP | 0.365 | 33 | 19 |
| GRID2       | chr4 | 94165523  | C   | T  | -- | -- | Intron  | SNP | 0.188 | 13 | 3  |
| GRID2       | chr4 | 94209647  | C   | A  | -- | -- | Intron  | SNP | 0.367 | 38 | 22 |
| GRID2       | chr4 | 94352851  | T   | C  | -- | -- | Intron  | SNP | 0.170 | 44 | 9  |
| GRID2       | chr4 | 94578009  | C   | A  | -- | -- | Intron  | SNP | 0.100 | 27 | 3  |
| GRID2       | chr4 | 94647581  | C   | G  | -- | -- | Intron  | SNP | 0.379 | 18 | 11 |
| --          | chr4 | 95003242  | A   | G  | -- | -- | IGR     | SNP | 0.353 | 44 | 24 |
| --          | chr4 | 95067464  | C   | T  | -- | -- | IGR     | SNP | 0.136 | 38 | 6  |
| HPGDS       | chr4 | 95244785  | C   | T  | -- | -- | Intron  | SNP | 0.108 | 33 | 4  |
| PDLIM5      | chr4 | 95516819  | A   | T  | -- | -- | Intron  | SNP | 0.104 | 43 | 5  |
| PDLIM5      | chr4 | 95516820  | G   | T  | -- | -- | Intron  | SNP | 0.104 | 43 | 5  |
| BMPR1B      | chr4 | 95695678  | T   | A  | -- | -- | Intron  | SNP | 0.654 | 18 | 34 |
| BMPR1B      | chr4 | 96027623  | C   | T  | -- | -- | Intron  | SNP | 0.193 | 67 | 16 |
| UNC5C       | chr4 | 96146616  | C   | T  | -- | -- | Intron  | SNP | 0.182 | 27 | 6  |
| UNC5C       | chr4 | 96157406  | -   | TA | -- | -- | Intron  | INS | 0.115 | 23 | 3  |
| --          | chr4 | 96539073  | A   | T  | -- | -- | IGR     | SNP | 0.153 | 50 | 9  |
| --          | chr4 | 96822053  | G   | T  | -- | -- | IGR     | SNP | 0.175 | 33 | 7  |
| --          | chr4 | 97019188  | A   | T  | -- | -- | IGR     | SNP | 0.187 | 61 | 14 |
| --          | chr4 | 97082937  | T   | C  | -- | -- | IGR     | SNP | 0.152 | 39 | 7  |
| --          | chr4 | 97095768  | T   | C  | -- | -- | IGR     | SNP | 0.385 | 32 | 20 |
| --          | chr4 | 97243740  | G   | A  | -- | -- | IGR     | SNP | 0.216 | 40 | 11 |
| --          | chr4 | 97288144  | T   | G  | -- | -- | IGR     | SNP | 0.106 | 42 | 5  |
| --          | chr4 | 97288145  | G   | T  | -- | -- | IGR     | SNP | 0.106 | 42 | 5  |
| --          | chr4 | 97312376  | C   | A  | -- | -- | IGR     | SNP | 0.173 | 67 | 14 |
| --          | chr4 | 97391644  | G   | A  | -- | -- | IGR     | SNP | 0.738 | 17 | 48 |
| --          | chr4 | 97513662  | A   | T  | -- | -- | IGR     | SNP | 0.156 | 54 | 10 |
| --          | chr4 | 97519818  | C   | A  | -- | -- | IGR     | SNP | 0.382 | 34 | 21 |
| --          | chr4 | 97536115  | G   | T  | -- | -- | IGR     | SNP | 0.212 | 41 | 11 |
| --          | chr4 | 97567087  | C   | T  | -- | -- | IGR     | SNP | 0.135 | 32 | 5  |
| --          | chr4 | 97596108  | C   | T  | -- | -- | IGR     | SNP | 0.189 | 30 | 7  |
| --          | chr4 | 97740019  | C   | A  | -- | -- | IGR     | SNP | 0.280 | 36 | 14 |
| --          | chr4 | 97830630  | A   | T  | -- | -- | IGR     | SNP | 0.156 | 38 | 7  |
| --          | chr4 | 97888865  | T   | C  | -- | -- | IGR     | SNP | 0.211 | 15 | 4  |
| --          | chr4 | 97891359  | G   | A  | -- | -- | IGR     | SNP | 0.174 | 38 | 8  |
| --          | chr4 | 98038299  | A   | T  | -- | -- | IGR     | SNP | 0.273 | 8  | 3  |
| --          | chr4 | 98082653  | A   | T  | -- | -- | IGR     | SNP | 0.286 | 10 | 4  |
| --          | chr4 | 98173590  | C   | A  | -- | -- | IGR     | SNP | 0.186 | 57 | 13 |
| --          | chr4 | 98301978  | C   | G  | -- | -- | IGR     | SNP | 0.136 | 51 | 8  |
| --          | chr4 | 98401750  | A   | C  | -- | -- | IGR     | SNP | 0.180 | 41 | 9  |
| --          | chr4 | 98406197  | G   | T  | -- | -- | IGR     | SNP | 0.292 | 51 | 21 |
| C4orf37     | chr4 | 98485931  | G   | T  | -- | -- | Intron  | SNP | 0.227 | 17 | 5  |
| C4orf37     | chr4 | 98556690  | G   | C  | -- | -- | Intron  | SNP | 0.205 | 35 | 9  |
| C4orf37     | chr4 | 98688631  | C   | A  | -- | -- | Intron  | SNP | 0.182 | 45 | 10 |
| C4orf37     | chr4 | 98910117  | G   | C  | -- | -- | Intron  | SNP | 0.136 | 38 | 6  |
| --          | chr4 | 99113867  | C   | G  | -- | -- | IGR     | SNP | 0.145 | 47 | 8  |
| --          | chr4 | 99594092  | A   | G  | -- | -- | IGR     | SNP | 0.171 | 58 | 12 |
| --          | chr4 | 99693222  | G   | T  | -- | -- | IGR     | SNP | 0.197 | 57 | 14 |
| --          | chr4 | 99777921  | A   | T  | -- | -- | IGR     | SNP | 0.103 | 52 | 6  |
| METAP1      | chr4 | 99943326  | T   | G  | -- | -- | Intron  | SNP | 0.250 | 54 | 18 |
| LOC10050705 | chr4 | 100071630 | G   | A  | -- | -- | RNA     | SNP | 0.103 | 61 | 7  |
| ADH1B       | chr4 | 100236208 | A   | C  | -- | -- | Intron  | SNP | 0.140 | 49 | 8  |
| --          | chr4 | 101005764 | G   | T  | -- | -- | IGR     | SNP | 0.169 | 74 | 15 |
| --          | chr4 | 101616541 | G   | A  | -- | -- | IGR     | SNP | 0.214 | 22 | 6  |
| --          | chr4 | 101767612 | T   | C  | -- | -- | IGR     | SNP | 0.465 | 23 | 20 |
| --          | chr4 | 101872425 | AAT | -  | -- | -- | IGR     | DEL | 0.150 | 17 | 3  |
| --          | chr4 | 102342843 | G   | A  | -- | -- | IGR     | SNP | 0.286 | 35 | 14 |
| BANK1       | chr4 | 102991233 | G   | C  | -- | -- | Intron  | SNP | 0.524 | 20 | 22 |
| --          | chr4 | 103021303 | A   | T  | -- | -- | IGR     | SNP | 0.529 | 16 | 18 |
| --          | chr4 | 103083688 | A   | T  | -- | -- | IGR     | SNP | 0.219 | 25 | 7  |
| --          | chr4 | 103125781 | T   | C  | -- | -- | IGR     | SNP | 0.253 | 56 | 19 |
| NFKB1       | chr4 | 103538619 | A   | G  | -- | -- | 3'Flank | SNP | 0.564 | 24 | 31 |
| MANBA       | chr4 | 103677125 | T   | G  | -- | -- | Intron  | SNP | 0.125 | 21 | 3  |
| CISD2,SLC9B | chr4 | 103807962 | G   | C  | -- | -- | Intron  | SNP | 0.333 | 20 | 10 |
| CISD2,SLC9B | chr4 | 103807963 | C   | A  | -- | -- | Intron  | SNP | 0.333 | 20 | 10 |
| SLC9B1      | chr4 | 103825218 | A   | T  | -- | -- | Intron  | SNP | 0.320 | 17 | 8  |
| SLC9B1      | chr4 | 103825405 | -   | CG | -- | -- | Intron  | INS | 0.143 | 18 | 3  |
| SLC9B1      | chr4 | 103825424 | T   | C  | -- | -- | Intron  | SNP | 0.188 | 13 | 3  |
| SLC9B1      | chr4 | 103828858 | A   | T  | -- | -- | Intron  | SNP | 0.176 | 28 | 6  |
| SLC9B1      | chr4 | 103868574 | C   | T  | -- | -- | Intron  | SNP | 0.118 | 45 | 6  |
| SLC9B1      | chr4 | 103870098 | T   | C  | -- | -- | Intron  | SNP | 0.192 | 21 | 5  |
| --          | chr4 | 104440389 | G   | T  | -- | -- | IGR     | SNP | 0.333 | 22 | 11 |
| CXXC4       | chr4 | 105410964 | T   | C  | -- | -- | Intron  | SNP | 0.404 | 31 | 21 |
| --          | chr4 | 105502521 | T   | A  | -- | -- | IGR     | SNP | 0.444 | 5  | 4  |
| --          | chr4 | 105574578 | GTA | -  | -- | -- | IGR     | DEL | 0.105 | 17 | 2  |
| --          | chr4 | 105796253 | C   | T  | -- | -- | IGR     | SNP | 0.481 | 14 | 13 |
| --          | chr4 | 105952915 | C   | G  | -- | -- | IGR     | SNP | 0.519 | 25 | 27 |
| --          | chr4 | 105953142 | C   | A  | -- | -- | IGR     | SNP | 0.200 | 20 | 5  |
| --          | chr4 | 105953148 | C   | T  | -- | -- | IGR     | SNP | 0.160 | 21 | 4  |



|          |      |           |          |      |             |             |                 |     |       |    |    |
|----------|------|-----------|----------|------|-------------|-------------|-----------------|-----|-------|----|----|
| --       | chr4 | 105953171 | C        | G    | --          | --          | IGR             | SNP | 0.316 | 26 | 12 |
| --       | chr4 | 105953543 | C        | G    | --          | --          | IGR             | SNP | 0.289 | 32 | 13 |
| --       | chr4 | 105989804 | A        | T    | --          | --          | IGR             | SNP | 0.231 | 10 | 3  |
| --       | chr4 | 106004230 | T        | C    | --          | --          | IGR             | SNP | 0.333 | 6  | 3  |
| --       | chr4 | 106240435 | C        | T    | --          | --          | IGR             | SNP | 0.833 | 4  | 20 |
| PPA2     | chr4 | 106346879 | CAT      | -    | --          | --          | Intron          | DEL | 0.118 | 15 | 2  |
| ARHGEF38 | chr4 | 106578750 | GAT      | -    | --          | --          | Intron          | DEL | 0.150 | 17 | 3  |
| GSTCD    | chr4 | 106673691 | C        | G    | --          | --          | Intron          | SNP | 0.864 | 3  | 19 |
| GSTCD    | chr4 | 106697056 | C        | T    | --          | --          | Intron          | SNP | 0.800 | 7  | 28 |
| --       | chr4 | 106803057 | G        | A    | --          | --          | IGR             | SNP | 0.333 | 8  | 4  |
| TBCK     | chr4 | 107199715 | C        | A    | --          | --          | Intron          | SNP | 0.308 | 9  | 4  |
| AIMP1    | chr4 | 107252968 | A        | T    | A531T,A603T | E177D,E201D | Missense_mutati | SNP | 0.400 | 15 | 10 |
| --       | chr4 | 107410546 | C        | A    | --          | --          | IGR             | SNP | 0.250 | 15 | 5  |
| --       | chr4 | 107410549 | C        | A    | --          | --          | IGR             | SNP | 0.263 | 14 | 5  |
| --       | chr4 | 107410611 | A        | G    | --          | --          | IGR             | SNP | 0.313 | 11 | 5  |
| --       | chr4 | 107642863 | -        | GTCT | --          | --          | IGR             | INS | 0.286 | 10 | 4  |
| --       | chr4 | 107728790 | T        | A    | --          | --          | IGR             | SNP | 0.771 | 8  | 27 |
| --       | chr4 | 109203289 | A        | T    | --          | --          | IGR             | SNP | 0.923 | 1  | 12 |
| --       | chr4 | 109397696 | C        | T    | --          | --          | IGR             | SNP | 0.750 | 7  | 21 |
| --       | chr4 | 109411846 | AGATAGAT | -    | --          | --          | IGR             | DEL | 0.111 | 24 | 3  |
| COL25A1  | chr4 | 110223290 | A        | T    | --          | --          | Intron          | SNP | 0.417 | 21 | 15 |
| LRIT3    | chr4 | 110778975 | T        | C    | --          | --          | Intron          | SNP | 0.190 | 17 | 4  |
| LRIT3    | chr4 | 110778976 | G        | T    | --          | --          | Intron          | SNP | 0.190 | 17 | 4  |
| LRIT3    | chr4 | 110779069 | T        | C    | --          | --          | Intron          | SNP | 0.286 | 20 | 8  |
| ELOVL6   | chr4 | 111022312 | C        | T    | --          | --          | Intron          | SNP | 0.960 | 1  | 24 |
| ENPEP    | chr4 | 111475699 | AGT      | -    | --          | --          | Intron          | DEL | 0.143 | 24 | 4  |
| --       | chr4 | 111495649 | TC       | -    | --          | --          | IGR             | DEL | 0.400 | 15 | 10 |
| --       | chr4 | 111680356 | T        | C    | --          | --          | IGR             | SNP | 0.500 | 9  | 9  |
| --       | chr4 | 111729456 | T        | A    | --          | --          | IGR             | SNP | 0.323 | 21 | 10 |
| --       | chr4 | 111978228 | A        | T    | --          | --          | IGR             | SNP | 0.281 | 23 | 9  |
| --       | chr4 | 112005422 | T        | C    | --          | --          | IGR             | SNP | 0.778 | 6  | 21 |
| --       | chr4 | 112025368 | C        | T    | --          | --          | IGR             | SNP | 0.250 | 12 | 4  |
| --       | chr4 | 112197546 | T        | C    | --          | --          | IGR             | SNP | 0.429 | 12 | 9  |
| --       | chr4 | 112226618 | T        | C    | --          | --          | IGR             | SNP | 0.280 | 18 | 7  |
| --       | chr4 | 112256405 | C        | A    | --          | --          | IGR             | SNP | 0.286 | 5  | 2  |
| --       | chr4 | 112933237 | A        | T    | --          | --          | IGR             | SNP | 0.250 | 9  | 3  |
| --       | chr4 | 114780100 | T        | C    | --          | --          | IGR             | SNP | 0.533 | 7  | 8  |
| --       | chr4 | 114966165 | A        | G    | --          | --          | IGR             | SNP | 0.900 | 2  | 18 |
| NDST4    | chr4 | 115819398 | T        | C    | --          | --          | Intron          | SNP | 0.500 | 6  | 6  |
| --       | chr4 | 116643243 | T        | A    | --          | --          | IGR             | SNP | 0.833 | 1  | 5  |
| --       | chr4 | 116925265 | C        | A    | --          | --          | IGR             | SNP | 1.000 | 0  | 4  |
| --       | chr4 | 117187266 | A        | C    | --          | --          | IGR             | SNP | 0.375 | 5  | 3  |
| --       | chr4 | 117330325 | C        | T    | --          | --          | IGR             | SNP | 0.400 | 6  | 4  |
| --       | chr4 | 117330569 | T        | C    | --          | --          | IGR             | SNP | 0.600 | 2  | 3  |
| --       | chr4 | 117334785 | A        | T    | --          | --          | IGR             | SNP | 0.667 | 2  | 4  |
| --       | chr4 | 117476011 | T        | G    | --          | --          | IGR             | SNP | 0.800 | 1  | 4  |
| --       | chr4 | 117480013 | T        | C    | --          | --          | IGR             | SNP | 0.583 | 5  | 7  |
| --       | chr4 | 117496809 | C        | T    | --          | --          | IGR             | SNP | 0.857 | 2  | 12 |
| --       | chr4 | 117641900 | A        | T    | --          | --          | IGR             | SNP | 0.255 | 35 | 12 |
| --       | chr4 | 117654138 | A        | G    | --          | --          | IGR             | SNP | 0.171 | 34 | 7  |
| --       | chr4 | 117766749 | A        | G    | --          | --          | IGR             | SNP | 0.391 | 14 | 9  |
| --       | chr4 | 118055714 | G        | T    | --          | --          | IGR             | SNP | 0.667 | 9  | 18 |
| --       | chr4 | 118106700 | A        | G    | --          | --          | IGR             | SNP | 0.121 | 29 | 4  |
| --       | chr4 | 118118241 | C        | A    | --          | --          | IGR             | SNP | 0.519 | 25 | 27 |
| --       | chr4 | 118131345 | T        | G    | --          | --          | IGR             | SNP | 0.238 | 16 | 5  |
| --       | chr4 | 118131346 | G        | T    | --          | --          | IGR             | SNP | 0.200 | 16 | 4  |
| --       | chr4 | 118528344 | G        | A    | --          | --          | IGR             | SNP | 0.238 | 16 | 5  |
| --       | chr4 | 118674155 | G        | A    | --          | --          | IGR             | SNP | 0.250 | 30 | 10 |
| --       | chr4 | 118685099 | CACAA    | -    | --          | --          | IGR             | DEL | 0.590 | 16 | 23 |
| --       | chr4 | 118691627 | T        | A    | --          | --          | IGR             | SNP | 0.291 | 39 | 16 |
| --       | chr4 | 118722343 | C        | T    | --          | --          | IGR             | SNP | 0.250 | 18 | 6  |
| --       | chr4 | 118732457 | C        | G    | --          | --          | IGR             | SNP | 0.294 | 24 | 10 |
| --       | chr4 | 119282445 | C        | G    | --          | --          | IGR             | SNP | 0.432 | 21 | 16 |
| --       | chr4 | 119357969 | G        | A    | --          | --          | IGR             | SNP | 0.160 | 21 | 4  |
| --       | chr4 | 119394369 | C        | T    | --          | --          | IGR             | SNP | 0.103 | 26 | 3  |
| --       | chr4 | 119487872 | CAAATT   | -    | --          | --          | IGR             | DEL | 0.115 | 23 | 3  |
| --       | chr4 | 119500469 | C        | T    | --          | --          | IGR             | SNP | 0.200 | 16 | 4  |
| --       | chr4 | 119516872 | T        | C    | --          | --          | IGR             | SNP | 0.278 | 13 | 5  |
| --       | chr4 | 119527306 | A        | G    | --          | --          | IGR             | SNP | 0.200 | 16 | 4  |
| --       | chr4 | 119527325 | C        | G    | --          | --          | IGR             | SNP | 0.148 | 23 | 4  |
| --       | chr4 | 119538188 | TGTA     | -    | --          | --          | IGR             | DEL | 0.125 | 14 | 2  |
| --       | chr4 | 119541904 | A        | G    | --          | --          | IGR             | SNP | 0.160 | 21 | 4  |
| --       | chr4 | 119547324 | G        | A    | --          | --          | IGR             | SNP | 0.455 | 12 | 10 |
| --       | chr4 | 119555426 | T        | C    | --          | --          | IGR             | SNP | 0.103 | 26 | 3  |
| --       | chr4 | 119591094 | C        | T    | --          | --          | IGR             | SNP | 0.175 | 33 | 7  |
| --       | chr4 | 119591110 | T        | G    | --          | --          | IGR             | SNP | 0.103 | 35 | 4  |
| SEC24D   | chr4 | 119657200 | G        | C    | --          | --          | Intron          | SNP | 0.304 | 16 | 7  |
| SEC24D   | chr4 | 119709626 | T        | C    | --          | --          | Intron          | SNP | 0.417 | 21 | 15 |
| SYNPO2   | chr4 | 119811294 | G        | T    | --          | --          | Intron          | SNP | 0.148 | 23 | 4  |
| --       | chr4 | 119985887 | C        | T    | --          | --          | IGR             | SNP | 0.200 | 12 | 3  |

|                  |      |           |     |       |        |        |                 |     |       |    |    |
|------------------|------|-----------|-----|-------|--------|--------|-----------------|-----|-------|----|----|
| --               | chr4 | 120296585 | G   | T     | --     | --     | IGR             | SNP | 0.360 | 16 | 9  |
| <i>PDE5A</i>     | chr4 | 120496680 | C   | T     | --     | --     | Intron          | SNP | 0.500 | 2  | 2  |
| --               | chr4 | 120946688 | T   | G     | --     | --     | IGR             | SNP | 0.414 | 17 | 12 |
| <i>PRDM5</i>     | chr4 | 121725040 | T   | C     | --     | --     | Intron          | SNP | 0.125 | 21 | 3  |
| <i>PRDM5</i>     | chr4 | 121725074 | G   | A     | --     | --     | Intron          | SNP | 0.143 | 18 | 3  |
| <i>PRDM5</i>     | chr4 | 121821088 | C   | A     | --     | --     | Intron          | SNP | 0.385 | 16 | 10 |
| --               | chr4 | 121866489 | G   | C     | --     | --     | IGR             | SNP | 0.571 | 9  | 12 |
| --               | chr4 | 121927663 | G   | A     | --     | --     | IGR             | SNP | 0.314 | 24 | 11 |
| --               | chr4 | 121932455 | G   | A     | --     | --     | IGR             | SNP | 0.588 | 21 | 30 |
| --               | chr4 | 122157927 | G   | A     | --     | --     | IGR             | SNP | 0.268 | 30 | 11 |
| <i>KIAA1109</i>  | chr4 | 123167907 | C   | A     | C5254A | H1752N | Missense_mutati | SNP | 0.162 | 31 | 6  |
| --               | chr4 | 123578215 | G   | A     | --     | --     | IGR             | SNP | 0.417 | 14 | 10 |
| --               | chr4 | 123611401 | G   | C     | --     | --     | IGR             | SNP | 0.514 | 17 | 18 |
| <i>SPATA5</i>    | chr4 | 123955850 | T   | C     | --     | --     | Intron          | SNP | 0.167 | 20 | 4  |
| <i>SPATA5</i>    | chr4 | 123972795 | C   | T     | --     | --     | Intron          | SNP | 0.500 | 4  | 4  |
| <i>LOC285419</i> | chr4 | 124637892 | T   | A     | --     | --     | RNA             | SNP | 0.222 | 14 | 4  |
| <i>LOC285419</i> | chr4 | 124643121 | G   | T     | --     | --     | RNA             | SNP | 0.143 | 18 | 3  |
| --               | chr4 | 125759921 | C   | T     | --     | --     | IGR             | SNP | 0.500 | 15 | 15 |
| <i>FAT4</i>      | chr4 | 126291455 | C   | G     | --     | --     | Intron          | SNP | 0.150 | 17 | 3  |
| --               | chr4 | 126455970 | A   | G     | --     | --     | IGR             | SNP | 0.500 | 16 | 16 |
| --               | chr4 | 126503917 | GA  | -     | --     | --     | IGR             | DEL | 0.105 | 17 | 2  |
| --               | chr4 | 126724059 | C   | A     | --     | --     | IGR             | SNP | 0.308 | 9  | 4  |
| --               | chr4 | 127164935 | T   | C     | --     | --     | IGR             | SNP | 0.313 | 22 | 10 |
| --               | chr4 | 127307433 | A   | C     | --     | --     | IGR             | SNP | 0.455 | 12 | 10 |
| --               | chr4 | 127309258 | TTG | -     | --     | --     | IGR             | DEL | 0.107 | 25 | 3  |
| --               | chr4 | 127354153 | C   | A     | --     | --     | IGR             | SNP | 0.211 | 15 | 4  |
| --               | chr4 | 127496415 | T   | G     | --     | --     | IGR             | SNP | 0.469 | 17 | 15 |
| --               | chr4 | 127499259 | A   | T     | --     | --     | IGR             | SNP | 0.480 | 13 | 12 |
| --               | chr4 | 128236087 | GT  | -     | --     | --     | IGR             | DEL | 0.452 | 17 | 14 |
| --               | chr4 | 128332319 | T   | A     | --     | --     | IGR             | SNP | 0.605 | 15 | 23 |
| --               | chr4 | 128352604 | T   | A     | --     | --     | IGR             | SNP | 0.667 | 12 | 24 |
| --               | chr4 | 128490430 | C   | A     | --     | --     | IGR             | SNP | 0.200 | 16 | 4  |
| --               | chr4 | 128515599 | A   | G     | --     | --     | IGR             | SNP | 0.222 | 14 | 4  |
| --               | chr4 | 128515602 | G   | A     | --     | --     | IGR             | SNP | 0.222 | 14 | 4  |
| --               | chr4 | 128515620 | C   | T     | --     | --     | IGR             | SNP | 0.222 | 14 | 4  |
| <i>SLC25A31</i>  | chr4 | 128675961 | G   | T     | --     | --     | Intron          | SNP | 0.438 | 18 | 14 |
| <i>SLC25A31</i>  | chr4 | 128692208 | T   | C     | --     | --     | Intron          | SNP | 0.478 | 12 | 11 |
| --               | chr4 | 128961370 | G   | A     | --     | --     | IGR             | SNP | 0.500 | 17 | 17 |
| --               | chr4 | 128976518 | C   | A     | --     | --     | IGR             | SNP | 0.250 | 12 | 4  |
| <i>LARP1B</i>    | chr4 | 129088129 | A   | C     | --     | --     | Intron          | SNP | 0.267 | 11 | 4  |
| <i>LARP1B</i>    | chr4 | 129103266 | C   | T     | --     | --     | Intron          | SNP | 0.364 | 7  | 4  |
| --               | chr4 | 129174524 | T   | C     | --     | --     | IGR             | SNP | 0.269 | 19 | 7  |
| --               | chr4 | 129186139 | C   | G     | --     | --     | IGR             | SNP | 0.426 | 31 | 23 |
| --               | chr4 | 129375757 | G   | C     | --     | --     | IGR             | SNP | 0.538 | 12 | 14 |
| --               | chr4 | 129456234 | G   | C     | --     | --     | IGR             | SNP | 0.525 | 19 | 21 |
| --               | chr4 | 129564062 | C   | G     | --     | --     | IGR             | SNP | 0.143 | 24 | 4  |
| --               | chr4 | 129801889 | C   | T     | --     | --     | IGR             | SNP | 0.516 | 15 | 16 |
| --               | chr4 | 130507546 | G   | T     | --     | --     | IGR             | SNP | 0.480 | 13 | 12 |
| --               | chr4 | 130840777 | C   | G     | --     | --     | IGR             | SNP | 0.325 | 27 | 13 |
| --               | chr4 | 130848505 | C   | G     | --     | --     | IGR             | SNP | 0.154 | 22 | 4  |
| --               | chr4 | 130990882 | G   | T     | --     | --     | IGR             | SNP | 0.250 | 6  | 2  |
| --               | chr4 | 131017048 | TG  | -     | --     | --     | IGR             | DEL | 0.241 | 22 | 7  |
| --               | chr4 | 131084617 | T   | A     | --     | --     | IGR             | SNP | 0.250 | 21 | 7  |
| --               | chr4 | 131118496 | T   | A     | --     | --     | IGR             | SNP | 0.216 | 29 | 8  |
| --               | chr4 | 131149586 | C   | A     | --     | --     | IGR             | SNP | 0.513 | 19 | 20 |
| --               | chr4 | 131187678 | A   | T     | --     | --     | IGR             | SNP | 0.488 | 22 | 21 |
| --               | chr4 | 131208187 | G   | A     | --     | --     | IGR             | SNP | 0.452 | 17 | 14 |
| --               | chr4 | 131261439 | A   | G     | --     | --     | IGR             | SNP | 0.387 | 19 | 12 |
| --               | chr4 | 131442061 | C   | G     | --     | --     | IGR             | SNP | 0.370 | 17 | 10 |
| --               | chr4 | 131472173 | G   | T     | --     | --     | IGR             | SNP | 0.278 | 13 | 5  |
| --               | chr4 | 131604932 | C   | T     | --     | --     | IGR             | SNP | 0.556 | 16 | 20 |
| --               | chr4 | 131858111 | G   | T     | --     | --     | IGR             | SNP | 0.333 | 14 | 7  |
| --               | chr4 | 131879043 | C   | T     | --     | --     | IGR             | SNP | 0.226 | 24 | 7  |
| --               | chr4 | 131889940 | T   | A     | --     | --     | IGR             | SNP | 0.250 | 9  | 3  |
| --               | chr4 | 131946733 | T   | G     | --     | --     | IGR             | SNP | 0.531 | 15 | 17 |
| --               | chr4 | 132161605 | G   | A     | --     | --     | IGR             | SNP | 0.467 | 8  | 7  |
| --               | chr4 | 132213899 | C   | T     | --     | --     | IGR             | SNP | 0.483 | 15 | 14 |
| --               | chr4 | 132327712 | -   | TTA   | --     | --     | IGR             | INS | 0.107 | 25 | 3  |
| --               | chr4 | 132384015 | A   | G     | --     | --     | IGR             | SNP | 0.393 | 17 | 11 |
| --               | chr4 | 132577771 | A   | G     | --     | --     | IGR             | SNP | 0.263 | 28 | 10 |
| --               | chr4 | 132599189 | A   | G     | --     | --     | IGR             | SNP | 0.130 | 47 | 7  |
| --               | chr4 | 132599377 | -   | TTTTA | --     | --     | IGR             | INS | 0.192 | 19 | 5  |
| --               | chr4 | 132599653 | A   | T     | --     | --     | IGR             | SNP | 0.194 | 25 | 6  |
| --               | chr4 | 132607243 | A   | G     | --     | --     | IGR             | SNP | 0.258 | 23 | 8  |
| --               | chr4 | 132633198 | C   | G     | --     | --     | IGR             | SNP | 0.138 | 56 | 9  |
| --               | chr4 | 132725380 | G   | A     | --     | --     | IGR             | SNP | 0.132 | 33 | 5  |
| --               | chr4 | 132783678 | G   | C     | --     | --     | IGR             | SNP | 0.114 | 31 | 4  |
| --               | chr4 | 132882952 | A   | G     | --     | --     | IGR             | SNP | 0.154 | 22 | 4  |
| --               | chr4 | 133086512 | G   | T     | --     | --     | IGR             | SNP | 0.222 | 14 | 4  |
| --               | chr4 | 133210635 | G   | A     | --     | --     | IGR             | SNP | 0.625 | 9  | 15 |

|                  |      |           |       |       |    |    |         |     |       |    |    |
|------------------|------|-----------|-------|-------|----|----|---------|-----|-------|----|----|
| --               | chr4 | 133219028 | TCA   | -     | -- | -- | IGR     | DEL | 0.136 | 19 | 3  |
| --               | chr4 | 133379007 | G     | T     | -- | -- | IGR     | SNP | 0.308 | 18 | 8  |
| --               | chr4 | 133442565 | A     | C     | -- | -- | IGR     | SNP | 0.275 | 29 | 11 |
| --               | chr4 | 133519881 | A     | C     | -- | -- | IGR     | SNP | 0.590 | 16 | 23 |
| --               | chr4 | 133768196 | G     | A     | -- | -- | IGR     | SNP | 0.167 | 20 | 4  |
| --               | chr4 | 133953295 | T     | C     | -- | -- | IGR     | SNP | 0.500 | 7  | 7  |
| <i>PCDH10</i>    | chr4 | 134099682 | G     | C     | -- | -- | Intron  | SNP | 0.421 | 11 | 8  |
| --               | chr4 | 134161033 | GC    | -     | -- | -- | IGR     | DEL | 0.273 | 24 | 9  |
| --               | chr4 | 134211797 | GTA   | -     | -- | -- | IGR     | DEL | 0.125 | 21 | 3  |
| --               | chr4 | 134444504 | -     | TTA   | -- | -- | IGR     | INS | 0.231 | 20 | 6  |
| --               | chr4 | 134598317 | G     | T     | -- | -- | IGR     | SNP | 0.185 | 22 | 5  |
| --               | chr4 | 134825488 | A     | G     | -- | -- | IGR     | SNP | 0.553 | 17 | 21 |
| --               | chr4 | 134834505 | G     | C     | -- | -- | IGR     | SNP | 0.550 | 9  | 11 |
| --               | chr4 | 134855459 | A     | C     | -- | -- | IGR     | SNP | 0.435 | 13 | 10 |
| --               | chr4 | 135021603 | T     | C     | -- | -- | IGR     | SNP | 0.500 | 15 | 15 |
| --               | chr4 | 135159699 | T     | C     | -- | -- | IGR     | SNP | 0.414 | 17 | 12 |
| --               | chr4 | 135546577 | A     | T     | -- | -- | IGR     | SNP | 0.333 | 12 | 6  |
| --               | chr4 | 135709562 | T     | A     | -- | -- | IGR     | SNP | 0.357 | 18 | 10 |
| --               | chr4 | 135846897 | A     | T     | -- | -- | IGR     | SNP | 0.500 | 4  | 4  |
| --               | chr4 | 135846960 | G     | A     | -- | -- | IGR     | SNP | 0.222 | 14 | 4  |
| --               | chr4 | 135906183 | C     | A     | -- | -- | IGR     | SNP | 0.189 | 30 | 7  |
| --               | chr4 | 136041754 | T     | C     | -- | -- | IGR     | SNP | 0.273 | 16 | 6  |
| --               | chr4 | 136209074 | G     | A     | -- | -- | IGR     | SNP | 0.357 | 18 | 10 |
| --               | chr4 | 136217362 | G     | T     | -- | -- | IGR     | SNP | 0.381 | 13 | 8  |
| --               | chr4 | 136369230 | G     | T     | -- | -- | IGR     | SNP | 0.267 | 11 | 4  |
| --               | chr4 | 136369259 | -     | GACAA | -- | -- | IGR     | INS | 0.211 | 15 | 4  |
| --               | chr4 | 136583472 | A     | G     | -- | -- | IGR     | SNP | 0.500 | 17 | 17 |
| --               | chr4 | 136896303 | G     | A     | -- | -- | IGR     | SNP | 0.417 | 28 | 20 |
| --               | chr4 | 137357811 | C     | G     | -- | -- | IGR     | SNP | 0.350 | 13 | 7  |
| --               | chr4 | 137549543 | A     | T     | -- | -- | IGR     | SNP | 0.222 | 14 | 4  |
| --               | chr4 | 137791994 | A     | C     | -- | -- | IGR     | SNP | 0.240 | 19 | 6  |
| --               | chr4 | 137978360 | A     | T     | -- | -- | IGR     | SNP | 0.361 | 23 | 13 |
| --               | chr4 | 137979318 | C     | A     | -- | -- | IGR     | SNP | 0.314 | 24 | 11 |
| --               | chr4 | 138088380 | A     | C     | -- | -- | IGR     | SNP | 0.423 | 15 | 11 |
| --               | chr4 | 138195749 | A     | T     | -- | -- | IGR     | SNP | 0.412 | 20 | 14 |
| --               | chr4 | 138279431 | TTA   | -     | -- | -- | IGR     | DEL | 0.125 | 14 | 2  |
| --               | chr4 | 138341072 | AT    | -     | -- | -- | IGR     | DEL | 0.417 | 14 | 10 |
| --               | chr4 | 138500809 | -     | CG    | -- | -- | IGR     | INS | 0.143 | 12 | 2  |
| --               | chr4 | 138507937 | G     | C     | -- | -- | IGR     | SNP | 0.472 | 19 | 17 |
| --               | chr4 | 138605424 | G     | T     | -- | -- | IGR     | SNP | 0.448 | 16 | 13 |
| <i>LOC641365</i> | chr4 | 138986035 | G     | A     | -- | -- | RNA     | SNP | 0.267 | 11 | 4  |
| --               | chr4 | 139807078 | T     | A     | -- | -- | IGR     | SNP | 0.250 | 12 | 4  |
| <i>CCRN4L</i>    | chr4 | 139953652 | A     | T     | -- | -- | Intron  | SNP | 0.444 | 10 | 8  |
| --               | chr4 | 140139923 | C     | A     | -- | -- | IGR     | SNP | 0.500 | 11 | 11 |
| --               | chr4 | 140328623 | C     | A     | -- | -- | IGR     | SNP | 0.167 | 20 | 4  |
| <i>MGST2</i>     | chr4 | 140592678 | G     | T     | -- | -- | Intron  | SNP | 0.565 | 10 | 13 |
| <i>TBC1D9</i>    | chr4 | 141546349 | G     | T     | -- | -- | Intron  | SNP | 0.314 | 24 | 11 |
| --               | chr4 | 141705035 | C     | A     | -- | -- | IGR     | SNP | 0.333 | 12 | 6  |
| <i>RNF150</i>    | chr4 | 141954514 | G     | T     | -- | -- | Intron  | SNP | 0.318 | 15 | 7  |
| --               | chr4 | 142435549 | G     | A     | -- | -- | IGR     | SNP | 0.400 | 9  | 6  |
| --               | chr4 | 142437827 | G     | C     | -- | -- | IGR     | SNP | 0.400 | 24 | 16 |
| --               | chr4 | 142865288 | T     | A     | -- | -- | IGR     | SNP | 0.292 | 17 | 7  |
| <i>INPP4B</i>    | chr4 | 143139272 | C     | G     | -- | -- | Intron  | SNP | 0.457 | 25 | 21 |
| <i>INPP4B</i>    | chr4 | 143178872 | -     | TGGA  | -- | -- | Intron  | INS | 0.148 | 23 | 4  |
| <i>INPP4B</i>    | chr4 | 143536507 | A     | G     | -- | -- | Intron  | SNP | 0.500 | 12 | 12 |
| <i>INPP4B</i>    | chr4 | 143589662 | C     | G     | -- | -- | Intron  | SNP | 0.364 | 21 | 12 |
| --               | chr4 | 143832582 | A     | G     | -- | -- | IGR     | SNP | 0.438 | 18 | 14 |
| --               | chr4 | 143934339 | T     | G     | -- | -- | IGR     | SNP | 0.159 | 37 | 7  |
| --               | chr4 | 144071777 | G     | C     | -- | -- | IGR     | SNP | 0.536 | 13 | 15 |
| --               | chr4 | 144162143 | C     | G     | -- | -- | IGR     | SNP | 0.531 | 15 | 17 |
| --               | chr4 | 144663374 | C     | G     | -- | -- | IGR     | SNP | 0.235 | 26 | 8  |
| --               | chr4 | 144671840 | GTACT | -     | -- | -- | IGR     | DEL | 0.444 | 15 | 12 |
| --               | chr4 | 144688234 | C     | G     | -- | -- | IGR     | SNP | 0.429 | 16 | 12 |
| --               | chr4 | 144756835 | A     | C     | -- | -- | IGR     | SNP | 0.192 | 21 | 5  |
| --               | chr4 | 144979495 | T     | C     | -- | -- | IGR     | SNP | 0.300 | 7  | 3  |
| --               | chr4 | 144985248 | A     | G     | -- | -- | IGR     | SNP | 0.179 | 23 | 5  |
| --               | chr4 | 144985303 | A     | G     | -- | -- | IGR     | SNP | 0.115 | 23 | 3  |
| <i>GYP A</i>     | chr4 | 145057774 | G     | A     | -- | -- | Intron  | SNP | 0.111 | 24 | 3  |
| --               | chr4 | 145240808 | C     | G     | -- | -- | IGR     | SNP | 0.318 | 15 | 7  |
| --               | chr4 | 145349513 | C     | T     | -- | -- | IGR     | SNP | 0.407 | 16 | 11 |
| --               | chr4 | 145495102 | G     | A     | -- | -- | IGR     | SNP | 0.481 | 14 | 13 |
| --               | chr4 | 145509647 | G     | C     | -- | -- | IGR     | SNP | 0.435 | 13 | 10 |
| <i>ABCE1</i>     | chr4 | 146050809 | T     | G     | -- | -- | 3'Flank | SNP | 0.429 | 12 | 9  |
| --               | chr4 | 146134588 | T     | A     | -- | -- | IGR     | SNP | 0.360 | 32 | 18 |
| --               | chr4 | 146288574 | A     | C     | -- | -- | IGR     | SNP | 0.211 | 15 | 4  |
| --               | chr4 | 146288579 | -     | GA    | -- | -- | IGR     | INS | 0.227 | 17 | 5  |
| --               | chr4 | 147129157 | A     | T     | -- | -- | IGR     | SNP | 0.106 | 42 | 5  |
| --               | chr4 | 147154573 | C     | T     | -- | -- | IGR     | SNP | 0.231 | 10 | 3  |
| <i>SLC10A7</i>   | chr4 | 147207093 | T     | A     | -- | -- | Intron  | SNP | 0.106 | 76 | 9  |
| --               | chr4 | 147506443 | C     | A     | -- | -- | IGR     | SNP | 0.162 | 31 | 6  |

|                 |      |           |        |           |             |             |                 |     |       |    |    |
|-----------------|------|-----------|--------|-----------|-------------|-------------|-----------------|-----|-------|----|----|
| --              | chr4 | 147568539 | -      | TTG       | --          | --          | IGR             | INS | 0.204 | 37 | 10 |
| <i>TTC29</i>    | chr4 | 147670052 | G      | C         | --          | --          | Intron          | SNP | 0.813 | 12 | 52 |
| <i>TTC29</i>    | chr4 | 147707979 | C      | G         | --          | --          | Intron          | SNP | 0.200 | 36 | 9  |
| <i>TTC29</i>    | chr4 | 147771752 | C      | T         | --          | --          | Intron          | SNP | 0.262 | 45 | 16 |
| <i>TTC29</i>    | chr4 | 147816532 | A      | C         | --          | --          | Intron          | SNP | 0.257 | 55 | 19 |
| --              | chr4 | 148036229 | G      | C         | --          | --          | IGR             | SNP | 0.467 | 8  | 7  |
| --              | chr4 | 148117247 | C      | A         | --          | --          | IGR             | SNP | 0.462 | 14 | 12 |
| --              | chr4 | 148202532 | A      | C         | --          | --          | IGR             | SNP | 0.293 | 29 | 12 |
| --              | chr4 | 148630776 | G      | A         | --          | --          | IGR             | SNP | 0.364 | 7  | 4  |
| <i>ARHGAP10</i> | chr4 | 148881074 | T      | A         | --          | --          | Intron          | SNP | 0.103 | 26 | 3  |
| <i>NR3C2</i>    | chr4 | 149241167 | -      | TG        | --          | --          | Intron          | INS | 0.143 | 18 | 3  |
| <i>NR3C2</i>    | chr4 | 149279623 | T      | G         | --          | --          | Intron          | SNP | 0.370 | 17 | 10 |
| --              | chr4 | 149590972 | G      | T         | --          | --          | IGR             | SNP | 0.414 | 17 | 12 |
| --              | chr4 | 149776093 | C      | T         | --          | --          | IGR             | SNP | 0.486 | 19 | 18 |
| --              | chr4 | 149813244 | C      | G         | --          | --          | IGR             | SNP | 0.447 | 26 | 21 |
| --              | chr4 | 149916426 | TG     | -         | --          | --          | IGR             | DEL | 0.323 | 21 | 10 |
| --              | chr4 | 149962846 | -      | ATTAAAAAG | --          | --          | IGR             | INS | 0.200 | 16 | 4  |
| --              | chr4 | 149968560 | CAT    | -         | --          | --          | IGR             | DEL | 0.130 | 20 | 3  |
| --              | chr4 | 150163621 | G      | C         | --          | --          | IGR             | SNP | 0.500 | 12 | 12 |
| --              | chr4 | 150388412 | T      | A         | --          | --          | IGR             | SNP | 0.333 | 12 | 6  |
| --              | chr4 | 150390892 | A      | T         | --          | --          | IGR             | SNP | 0.286 | 5  | 2  |
| --              | chr4 | 150917594 | C      | A         | --          | --          | IGR             | SNP | 0.333 | 16 | 8  |
| <i>LRBA</i>     | chr4 | 151202335 | C      | T         | --          | --          | Intron          | SNP | 0.303 | 23 | 10 |
| --              | chr4 | 151989530 | C      | G         | --          | --          | IGR             | SNP | 0.514 | 17 | 18 |
| --              | chr4 | 152282394 | T      | C         | --          | --          | IGR             | SNP | 0.171 | 34 | 7  |
| <i>FAM160A1</i> | chr4 | 152439319 | A      | G         | --          | --          | Intron          | SNP | 0.304 | 16 | 7  |
| <i>PET112</i>   | chr4 | 152653584 | -      | GCT       | --          | --          | Intron          | INS | 0.200 | 12 | 3  |
| --              | chr4 | 152708140 | C      | G         | --          | --          | IGR             | SNP | 0.294 | 12 | 5  |
| --              | chr4 | 152726988 | C      | T         | --          | --          | IGR             | SNP | 0.125 | 21 | 3  |
| --              | chr4 | 152875418 | A      | C         | --          | --          | IGR             | SNP | 0.370 | 29 | 17 |
| --              | chr4 | 153193388 | G      | A         | --          | --          | IGR             | SNP | 0.174 | 19 | 4  |
| <i>TMEM154</i>  | chr4 | 153581585 | C      | T         | --          | --          | Intron          | SNP | 0.400 | 18 | 12 |
| --              | chr4 | 153622531 | C      | G         | --          | --          | IGR             | SNP | 0.103 | 26 | 3  |
| <i>FHDC1</i>    | chr4 | 153872691 | G      | T         | --          | --          | Intron          | SNP | 0.174 | 19 | 4  |
| --              | chr4 | 154363123 | T      | C         | --          | --          | IGR             | SNP | 0.500 | 11 | 11 |
| --              | chr4 | 154583205 | TG     | -         | --          | --          | IGR             | DEL | 0.421 | 22 | 16 |
| --              | chr4 | 154823910 | G      | T         | --          | --          | IGR             | SNP | 0.364 | 21 | 12 |
| --              | chr4 | 154987448 | C      | A         | --          | --          | IGR             | SNP | 0.457 | 19 | 16 |
| <i>DCHS2</i>    | chr4 | 155187824 | AG     | -         | --          | --          | Intron          | DEL | 0.118 | 15 | 2  |
| <i>DCHS2</i>    | chr4 | 155254598 | C      | T         | G1265A,G276 | G422E,G921E | Missense_mutati | SNP | 0.444 | 15 | 12 |
| <i>DCHS2</i>    | chr4 | 155313605 | G      | T         | --          | --          | Intron          | SNP | 0.441 | 19 | 15 |
| --              | chr4 | 155476502 | T      | C         | --          | --          | IGR             | SNP | 0.310 | 20 | 9  |
| --              | chr4 | 155648220 | G      | T         | --          | --          | IGR             | SNP | 0.423 | 15 | 11 |
| <i>RBM46</i>    | chr4 | 155713871 | A      | G         | --          | --          | Intron          | SNP | 0.375 | 15 | 9  |
| --              | chr4 | 155841367 | TA     | -         | --          | --          | IGR             | DEL | 0.105 | 17 | 2  |
| --              | chr4 | 155965353 | C      | T         | --          | --          | IGR             | SNP | 0.231 | 20 | 6  |
| --              | chr4 | 156242622 | A      | G         | --          | --          | IGR             | SNP | 0.600 | 4  | 6  |
| --              | chr4 | 156534485 | G      | C         | --          | --          | IGR             | SNP | 0.217 | 18 | 5  |
| <i>GUCY1B3</i>  | chr4 | 156722464 | A      | G         | --          | --          | Intron          | SNP | 0.391 | 14 | 9  |
| --              | chr4 | 156958558 | G      | T         | --          | --          | IGR             | SNP | 0.462 | 7  | 6  |
| --              | chr4 | 157059043 | C      | T         | --          | --          | IGR             | SNP | 0.500 | 15 | 15 |
| --              | chr4 | 157092265 | G      | T         | --          | --          | IGR             | SNP | 0.240 | 19 | 6  |
| --              | chr4 | 157293374 | A      | G         | --          | --          | IGR             | SNP | 0.500 | 3  | 3  |
| --              | chr4 | 157439230 | ATG    | -         | --          | --          | IGR             | DEL | 0.353 | 11 | 6  |
| --              | chr4 | 157671670 | G      | T         | --          | --          | IGR             | SNP | 0.600 | 10 | 15 |
| --              | chr4 | 157917026 | T      | C         | --          | --          | IGR             | SNP | 0.379 | 18 | 11 |
| <i>GRIA2</i>    | chr4 | 158272101 | G      | T         | --          | --          | Intron          | SNP | 0.267 | 11 | 4  |
| --              | chr4 | 158461367 | G      | A         | --          | --          | IGR             | SNP | 0.382 | 21 | 13 |
| --              | chr4 | 158675980 | C      | T         | --          | --          | IGR             | SNP | 0.333 | 6  | 3  |
| --              | chr4 | 159285262 | A      | G         | --          | --          | IGR             | SNP | 0.286 | 10 | 4  |
| <i>FNIP2</i>    | chr4 | 159807884 | C      | G         | --          | --          | Intron          | SNP | 0.485 | 17 | 16 |
| --              | chr4 | 160418840 | TCTTTA | -         | --          | --          | IGR             | DEL | 0.647 | 6  | 11 |
| --              | chr4 | 160444163 | G      | A         | --          | --          | IGR             | SNP | 0.333 | 6  | 3  |
| --              | chr4 | 160778413 | A      | T         | --          | --          | IGR             | SNP | 0.500 | 8  | 8  |
| --              | chr4 | 160850094 | C      | G         | --          | --          | IGR             | SNP | 0.815 | 5  | 22 |
| --              | chr4 | 160861331 | GC     | -         | --          | --          | IGR             | DEL | 0.118 | 15 | 2  |
| --              | chr4 | 160909747 | CAA    | -         | --          | --          | IGR             | DEL | 0.538 | 12 | 14 |
| --              | chr4 | 161187556 | T      | A         | --          | --          | IGR             | SNP | 0.136 | 19 | 3  |
| --              | chr4 | 161372010 | AT     | -         | --          | --          | IGR             | DEL | 0.125 | 14 | 2  |
| --              | chr4 | 161534917 | C      | T         | --          | --          | IGR             | SNP | 0.560 | 11 | 14 |
| --              | chr4 | 161548841 | A      | C         | --          | --          | IGR             | SNP | 0.190 | 17 | 4  |
| --              | chr4 | 161749391 | A      | T         | --          | --          | IGR             | SNP | 0.480 | 13 | 12 |
| --              | chr4 | 161782604 | G      | C         | --          | --          | IGR             | SNP | 0.567 | 13 | 17 |
| --              | chr4 | 161914549 | T      | G         | --          | --          | IGR             | SNP | 0.235 | 13 | 4  |
| --              | chr4 | 162218341 | -      | CAA       | --          | --          | IGR             | INS | 0.111 | 16 | 2  |
| <i>FSTL5</i>    | chr4 | 162494807 | C      | A         | --          | --          | Intron          | SNP | 0.316 | 13 | 6  |
| <i>FSTL5</i>    | chr4 | 162711955 | T      | A         | --          | --          | Intron          | SNP | 0.207 | 23 | 6  |
| --              | chr4 | 163276858 | ATG    | -         | --          | --          | IGR             | DEL | 0.125 | 21 | 3  |
| --              | chr4 | 163535684 | G      | C         | --          | --          | IGR             | SNP | 0.389 | 11 | 7  |
| --              | chr4 | 163610234 | G      | A         | --          | --          | IGR             | SNP | 0.129 | 27 | 4  |

|           |      |           |      |      |    |    |        |     |       |    |    |
|-----------|------|-----------|------|------|----|----|--------|-----|-------|----|----|
| --        | chr4 | 163804944 | GGA  | -    | -- | -- | IGR    | DEL | 0.111 | 16 | 2  |
| --        | chr4 | 163849275 | G    | T    | -- | -- | IGR    | SNP | 0.500 | 15 | 15 |
| --        | chr4 | 163849649 | G    | A    | -- | -- | IGR    | SNP | 0.357 | 9  | 5  |
| --        | chr4 | 163947743 | G    | T    | -- | -- | IGR    | SNP | 0.500 | 5  | 5  |
| --        | chr4 | 164118391 | TA   | -    | -- | -- | IGR    | DEL | 0.111 | 16 | 2  |
| --        | chr4 | 164238792 | A    | T    | -- | -- | IGR    | SNP | 0.292 | 17 | 7  |
| --        | chr4 | 164368816 | T    | A    | -- | -- | IGR    | SNP | 0.600 | 4  | 6  |
| 1-Mar     | chr4 | 164592000 | A    | G    | -- | -- | Intron | SNP | 0.286 | 15 | 6  |
| 1-Mar     | chr4 | 165185324 | G    | C    | -- | -- | Intron | SNP | 0.263 | 14 | 5  |
| 1-Mar     | chr4 | 165284757 | G    | T    | -- | -- | Intron | SNP | 0.333 | 12 | 6  |
| --        | chr4 | 165316651 | C    | T    | -- | -- | IGR    | SNP | 0.241 | 22 | 7  |
| --        | chr4 | 165507817 | C    | T    | -- | -- | IGR    | SNP | 0.261 | 17 | 6  |
| --        | chr4 | 165773577 | T    | A    | -- | -- | IGR    | SNP | 0.444 | 5  | 4  |
| TRIM61    | chr4 | 165896634 | ATGT | -    | -- | -- | Intron | DEL | 0.111 | 16 | 2  |
| --        | chr4 | 165921862 | A    | T    | -- | -- | IGR    | SNP | 0.121 | 29 | 4  |
| --        | chr4 | 165921879 | G    | A    | -- | -- | IGR    | SNP | 0.133 | 26 | 4  |
| --        | chr4 | 165921896 | GT   | -    | -- | -- | IGR    | DEL | 0.125 | 28 | 4  |
| --        | chr4 | 166123629 | G    | C    | -- | -- | IGR    | SNP | 0.481 | 14 | 13 |
| KLHL2     | chr4 | 166151665 | T    | C    | -- | -- | Intron | SNP | 0.222 | 21 | 6  |
| KLHL2     | chr4 | 166164636 | G    | A    | -- | -- | Intron | SNP | 0.190 | 17 | 4  |
| KLHL2     | chr4 | 166202387 | C    | T    | -- | -- | Intron | SNP | 0.150 | 17 | 3  |
| CPE       | chr4 | 166320132 | C    | A    | -- | -- | Intron | SNP | 0.188 | 13 | 3  |
| CPE       | chr4 | 166363131 | A    | T    | -- | -- | Intron | SNP | 0.727 | 6  | 16 |
| TLL1      | chr4 | 167017709 | T    | G    | -- | -- | Intron | SNP | 0.190 | 17 | 4  |
| --        | chr4 | 167181719 | G    | T    | -- | -- | IGR    | SNP | 0.350 | 13 | 7  |
| --        | chr4 | 167326682 | T    | G    | -- | -- | IGR    | SNP | 0.438 | 9  | 7  |
| --        | chr4 | 167390602 | C    | A    | -- | -- | IGR    | SNP | 0.250 | 12 | 4  |
| --        | chr4 | 167414079 | A    | G    | -- | -- | IGR    | SNP | 0.600 | 6  | 9  |
| --        | chr4 | 167446160 | -    | TA   | -- | -- | IGR    | INS | 0.133 | 26 | 4  |
| --        | chr4 | 167540838 | GCA  | -    | -- | -- | IGR    | DEL | 0.133 | 13 | 2  |
| --        | chr4 | 167622903 | G    | A    | -- | -- | IGR    | SNP | 0.444 | 5  | 4  |
| --        | chr4 | 167622907 | G    | A    | -- | -- | IGR    | SNP | 0.364 | 7  | 4  |
| SPOCK3    | chr4 | 167854623 | C    | T    | -- | -- | Intron | SNP | 0.467 | 8  | 7  |
| SPOCK3    | chr4 | 168115712 | G    | A    | -- | -- | Intron | SNP | 0.286 | 25 | 10 |
| --        | chr4 | 171075249 | T    | G    | -- | -- | IGR    | SNP | 0.167 | 15 | 3  |
| --        | chr4 | 171075288 | -    | AG   | -- | -- | IGR    | INS | 0.120 | 22 | 3  |
| --        | chr4 | 171575726 | G    | A    | -- | -- | IGR    | SNP | 0.500 | 10 | 10 |
| --        | chr4 | 171801697 | A    | T    | -- | -- | IGR    | SNP | 0.643 | 10 | 18 |
| --        | chr4 | 172423709 | C    | T    | -- | -- | IGR    | SNP | 0.462 | 14 | 12 |
| --        | chr4 | 172433004 | G    | T    | -- | -- | IGR    | SNP | 0.375 | 10 | 6  |
| --        | chr4 | 172574497 | T    | C    | -- | -- | IGR    | SNP | 0.143 | 18 | 3  |
| GALNTL6   | chr4 | 173257421 | G    | T    | -- | -- | Intron | SNP | 0.444 | 5  | 4  |
| GALNTL6   | chr4 | 173645224 | A    | T    | -- | -- | Intron | SNP | 0.800 | 3  | 12 |
| GALNTL6   | chr4 | 173700127 | ACT  | -    | -- | -- | Intron | DEL | 0.105 | 17 | 2  |
| GALNTL6   | chr4 | 173925773 | A    | T    | -- | -- | Intron | SNP | 0.813 | 3  | 13 |
| GALNT7    | chr4 | 174243018 | T    | C    | -- | -- | 3'UTR  | SNP | 0.818 | 4  | 18 |
| --        | chr4 | 174419158 | C    | T    | -- | -- | IGR    | SNP | 0.158 | 16 | 3  |
| --        | chr4 | 174511864 | C    | T    | -- | -- | IGR    | SNP | 0.952 | 1  | 20 |
| --        | chr4 | 174556463 | C    | T    | -- | -- | IGR    | SNP | 0.818 | 2  | 9  |
| --        | chr4 | 174568204 | CA   | -    | -- | -- | IGR    | DEL | 0.118 | 15 | 2  |
| --        | chr4 | 174972860 | T    | A    | -- | -- | IGR    | SNP | 0.455 | 6  | 5  |
| --        | chr4 | 175390100 | A    | T    | -- | -- | IGR    | SNP | 0.929 | 1  | 13 |
| GLRA3     | chr4 | 175631910 | C    | T    | -- | -- | Intron | SNP | 0.714 | 4  | 10 |
| --        | chr4 | 176036828 | G    | C    | -- | -- | IGR    | SNP | 0.412 | 10 | 7  |
| --        | chr4 | 176211625 | -    | ATT  | -- | -- | IGR    | INS | 0.200 | 20 | 5  |
| GPM6A     | chr4 | 176692413 | C    | T    | -- | -- | Intron | SNP | 0.586 | 12 | 17 |
| GPM6A     | chr4 | 176774651 | A    | T    | -- | -- | Intron | SNP | 0.667 | 5  | 10 |
| GPM6A     | chr4 | 176794021 | C    | A    | -- | -- | Intron | SNP | 0.158 | 16 | 3  |
| GPM6A     | chr4 | 176815384 | A    | T    | -- | -- | Intron | SNP | 0.240 | 19 | 6  |
| VEGFC     | chr4 | 177637767 | G    | A    | -- | -- | Intron | SNP | 0.615 | 5  | 8  |
| --        | chr4 | 178435243 | C    | T    | -- | -- | IGR    | SNP | 0.467 | 8  | 7  |
| LOC285501 | chr4 | 178783587 | C    | G    | -- | -- | RNA    | SNP | 0.294 | 24 | 10 |
| LOC285501 | chr4 | 178877064 | -    | CAAT | -- | -- | RNA    | INS | 0.133 | 13 | 2  |
| --        | chr4 | 178936489 | C    | A    | -- | -- | IGR    | SNP | 0.250 | 9  | 3  |
| --        | chr4 | 179153290 | T    | A    | -- | -- | IGR    | SNP | 0.267 | 11 | 4  |
| --        | chr4 | 179174482 | G    | A    | -- | -- | IGR    | SNP | 0.276 | 21 | 8  |
| --        | chr4 | 179285231 | T    | A    | -- | -- | IGR    | SNP | 0.158 | 16 | 3  |
| --        | chr4 | 179436566 | A    | G    | -- | -- | IGR    | SNP | 0.200 | 12 | 3  |
| --        | chr4 | 179955445 | T    | A    | -- | -- | IGR    | SNP | 0.200 | 12 | 3  |
| --        | chr4 | 179955476 | A    | G    | -- | -- | IGR    | SNP | 0.231 | 10 | 3  |
| --        | chr4 | 180141680 | T    | C    | -- | -- | IGR    | SNP | 0.423 | 15 | 11 |
| --        | chr4 | 180141682 | A    | G    | -- | -- | IGR    | SNP | 0.400 | 15 | 10 |
| --        | chr4 | 180176600 | G    | T    | -- | -- | IGR    | SNP | 0.273 | 16 | 6  |
| --        | chr4 | 180561267 | T    | G    | -- | -- | IGR    | SNP | 0.571 | 3  | 4  |
| --        | chr4 | 180647164 | A    | G    | -- | -- | IGR    | SNP | 0.357 | 9  | 5  |
| --        | chr4 | 180757914 | G    | T    | -- | -- | IGR    | SNP | 0.129 | 27 | 4  |
| --        | chr4 | 180858094 | G    | C    | -- | -- | IGR    | SNP | 0.522 | 11 | 12 |
| --        | chr4 | 180895687 | C    | T    | -- | -- | IGR    | SNP | 0.714 | 6  | 15 |
| --        | chr4 | 180910842 | T    | G    | -- | -- | IGR    | SNP | 0.313 | 11 | 5  |
| --        | chr4 | 180943581 | G    | A    | -- | -- | IGR    | SNP | 0.765 | 4  | 13 |

|           |      |           |     |   |         |        |                |     |       |    |    |
|-----------|------|-----------|-----|---|---------|--------|----------------|-----|-------|----|----|
| --        | chr4 | 180999473 | C   | G | --      | --     | IGR            | SNP | 0.188 | 13 | 3  |
| --        | chr4 | 181615629 | C   | T | --      | --     | IGR            | SNP | 0.677 | 10 | 21 |
| --        | chr4 | 181686642 | T   | A | --      | --     | IGR            | SNP | 0.167 | 20 | 4  |
| --        | chr4 | 181778692 | C   | T | --      | --     | IGR            | SNP | 0.667 | 7  | 14 |
| --        | chr4 | 181800843 | G   | T | --      | --     | IGR            | SNP | 0.125 | 21 | 3  |
| --        | chr4 | 181838294 | G   | A | --      | --     | IGR            | SNP | 0.462 | 7  | 6  |
| --        | chr4 | 181888802 | A   | T | --      | --     | IGR            | SNP | 0.682 | 7  | 15 |
| LINC00290 | chr4 | 182059321 | G   | A | --      | --     | RNA            | SNP | 0.250 | 6  | 2  |
| --        | chr4 | 182108880 | A   | G | --      | --     | IGR            | SNP | 0.333 | 12 | 6  |
| --        | chr4 | 182291277 | G   | A | --      | --     | IGR            | SNP | 0.600 | 6  | 9  |
| --        | chr4 | 182355712 | A   | T | --      | --     | IGR            | SNP | 0.400 | 6  | 4  |
| --        | chr4 | 182355738 | T   | A | --      | --     | IGR            | SNP | 0.500 | 4  | 4  |
| --        | chr4 | 182355842 | TC  | - | --      | --     | IGR            | DEL | 0.188 | 13 | 3  |
| --        | chr4 | 182357188 | T   | G | --      | --     | IGR            | SNP | 0.286 | 10 | 4  |
| --        | chr4 | 182382822 | C   | T | --      | --     | IGR            | SNP | 0.389 | 11 | 7  |
| --        | chr4 | 182387274 | T   | A | --      | --     | IGR            | SNP | 0.300 | 7  | 3  |
| --        | chr4 | 182389435 | A   | T | --      | --     | IGR            | SNP | 0.176 | 14 | 3  |
| --        | chr4 | 182511602 | T   | C | --      | --     | IGR            | SNP | 0.308 | 18 | 8  |
| --        | chr4 | 182538505 | T   | A | --      | --     | IGR            | SNP | 0.211 | 15 | 4  |
| --        | chr4 | 182922570 | A   | C | --      | --     | IGR            | SNP | 0.704 | 8  | 19 |
| --        | chr4 | 183016132 | T   | C | --      | --     | IGR            | SNP | 0.471 | 9  | 8  |
| --        | chr4 | 183195043 | A   | T | --      | --     | IGR            | SNP | 0.179 | 23 | 5  |
| ODZ3      | chr4 | 183356356 | G   | A | --      | --     | Intron         | SNP | 0.280 | 18 | 7  |
| ODZ3      | chr4 | 183365180 | G   | C | --      | --     | Intron         | SNP | 0.353 | 11 | 6  |
| --        | chr4 | 183782947 | C   | T | --      | --     | IGR            | SNP | 0.913 | 2  | 21 |
| --        | chr4 | 183805704 | A   | T | --      | --     | IGR            | SNP | 0.458 | 13 | 11 |
| --        | chr4 | 184383280 | T   | A | --      | --     | IGR            | SNP | 0.667 | 7  | 14 |
| ENPP6     | chr4 | 185021926 | G   | A | --      | --     | Intron         | SNP | 0.594 | 13 | 19 |
| --        | chr4 | 185446332 | C   | T | --      | --     | IGR            | SNP | 0.375 | 10 | 6  |
| LOC731424 | chr4 | 185766064 | C   | A | --      | --     | RNA            | SNP | 0.233 | 23 | 7  |
| LOC731424 | chr4 | 185766065 | C   | G | --      | --     | RNA            | SNP | 0.233 | 23 | 7  |
| --        | chr4 | 185781572 | GTA | - | --      | --     | IGR            | DEL | 0.471 | 9  | 8  |
| --        | chr4 | 185856882 | C   | A | --      | --     | IGR            | SNP | 0.500 | 17 | 17 |
| --        | chr4 | 185858569 | T   | G | --      | --     | IGR            | SNP | 0.294 | 12 | 5  |
| --        | chr4 | 185905908 | C   | T | --      | --     | IGR            | SNP | 0.531 | 15 | 17 |
| --        | chr4 | 185978199 | T   | A | --      | --     | IGR            | SNP | 0.167 | 25 | 5  |
| PDLIM3    | chr4 | 186430230 | C   | T | --      | --     | Intron         | SNP | 0.304 | 16 | 7  |
| SORBS2    | chr4 | 186797605 | C   | T | --      | --     | Intron         | SNP | 0.667 | 22 | 44 |
| --        | chr4 | 187032654 | G   | A | --      | --     | IGR            | SNP | 0.143 | 18 | 3  |
| --        | chr4 | 187061516 | C   | T | --      | --     | IGR            | SNP | 0.125 | 35 | 5  |
| LOC285441 | chr4 | 187339531 | C   | T | --      | --     | RNA            | SNP | 0.300 | 7  | 3  |
| --        | chr4 | 187439850 | G   | C | --      | --     | IGR            | SNP | 0.188 | 13 | 3  |
| MTNR1A    | chr4 | 187458415 | T   | G | --      | --     | Intron         | SNP | 0.714 | 6  | 15 |
| FAT1      | chr4 | 187525110 | G   | A | C10570T | Q3524X | Nonsense_mutat | SNP | 0.130 | 20 | 3  |
| FAT1      | chr4 | 187586472 | T   | A | --      | --     | Intron         | SNP | 0.176 | 14 | 3  |
| --        | chr4 | 187769822 | C   | A | --      | --     | IGR            | SNP | 0.360 | 16 | 9  |
| --        | chr4 | 188016564 | G   | T | --      | --     | IGR            | SNP | 0.643 | 10 | 18 |
| --        | chr4 | 188047983 | C   | T | --      | --     | IGR            | SNP | 0.217 | 18 | 5  |
| --        | chr4 | 188527931 | C   | A | --      | --     | IGR            | SNP | 0.517 | 28 | 30 |
| --        | chr4 | 188528185 | C   | A | --      | --     | IGR            | SNP | 0.615 | 20 | 32 |
| --        | chr4 | 188528315 | C   | A | --      | --     | IGR            | SNP | 0.440 | 28 | 22 |
| --        | chr4 | 188528658 | C   | T | --      | --     | IGR            | SNP | 0.537 | 19 | 22 |
| --        | chr4 | 188660278 | C   | A | --      | --     | IGR            | SNP | 0.161 | 26 | 5  |
| --        | chr4 | 188686212 | A   | G | --      | --     | IGR            | SNP | 0.283 | 43 | 17 |
| --        | chr4 | 188720179 | G   | T | --      | --     | IGR            | SNP | 0.153 | 61 | 11 |
| --        | chr4 | 188757058 | G   | A | --      | --     | IGR            | SNP | 0.515 | 47 | 50 |
| --        | chr4 | 188757794 | G   | A | --      | --     | IGR            | SNP | 0.463 | 58 | 50 |
| --        | chr4 | 188757795 | G   | A | --      | --     | IGR            | SNP | 0.463 | 58 | 50 |
| --        | chr4 | 188758950 | G   | C | --      | --     | IGR            | SNP | 0.536 | 32 | 37 |
| --        | chr4 | 188759258 | G   | T | --      | --     | IGR            | SNP | 0.500 | 26 | 26 |
| --        | chr4 | 188761981 | C   | A | --      | --     | IGR            | SNP | 0.531 | 30 | 34 |
| --        | chr4 | 188848706 | C   | G | --      | --     | IGR            | SNP | 0.271 | 35 | 13 |
| --        | chr4 | 188848768 | C   | A | --      | --     | IGR            | SNP | 0.222 | 42 | 12 |
| --        | chr4 | 188848794 | C   | G | --      | --     | IGR            | SNP | 0.265 | 36 | 13 |
| --        | chr4 | 188848815 | C   | G | --      | --     | IGR            | SNP | 0.212 | 41 | 11 |
| --        | chr4 | 188848866 | C   | A | --      | --     | IGR            | SNP | 0.485 | 35 | 33 |
| --        | chr4 | 188849269 | C   | G | --      | --     | IGR            | SNP | 0.455 | 36 | 30 |
| --        | chr4 | 188849333 | C   | T | --      | --     | IGR            | SNP | 0.175 | 33 | 7  |
| --        | chr4 | 188849436 | C   | T | --      | --     | IGR            | SNP | 0.424 | 34 | 25 |
| --        | chr4 | 189073507 | A   | T | --      | --     | IGR            | SNP | 0.387 | 19 | 12 |
| --        | chr4 | 189237968 | C   | T | --      | --     | IGR            | SNP | 0.256 | 61 | 21 |
| --        | chr4 | 189237993 | C   | A | --      | --     | IGR            | SNP | 0.429 | 56 | 42 |
| --        | chr4 | 189238359 | C   | T | --      | --     | IGR            | SNP | 0.480 | 39 | 36 |
| --        | chr4 | 189238513 | C   | A | --      | --     | IGR            | SNP | 0.479 | 50 | 46 |
| --        | chr4 | 189238568 | C   | T | --      | --     | IGR            | SNP | 0.520 | 47 | 51 |
| --        | chr4 | 189238992 | C   | T | --      | --     | IGR            | SNP | 0.512 | 40 | 42 |
| --        | chr4 | 189239067 | C   | A | --      | --     | IGR            | SNP | 0.391 | 42 | 27 |
| --        | chr4 | 189239125 | C   | T | --      | --     | IGR            | SNP | 0.209 | 53 | 14 |
| --        | chr4 | 189239127 | C   | T | --      | --     | IGR            | SNP | 0.209 | 53 | 14 |
| --        | chr4 | 189239168 | C   | T | --      | --     | IGR            | SNP | 0.329 | 55 | 27 |

|                |      |           |    |       |    |    |        |     |       |     |    |
|----------------|------|-----------|----|-------|----|----|--------|-----|-------|-----|----|
| --             | chr4 | 189239402 | C  | G     | -- | -- | IGR    | SNP | 0.505 | 51  | 52 |
| --             | chr4 | 189239845 | C  | G     | -- | -- | IGR    | SNP | 0.518 | 54  | 58 |
| --             | chr4 | 189240047 | C  | T     | -- | -- | IGR    | SNP | 0.567 | 45  | 59 |
| --             | chr4 | 189240475 | C  | G     | -- | -- | IGR    | SNP | 0.619 | 16  | 26 |
| --             | chr4 | 189240690 | C  | A     | -- | -- | IGR    | SNP | 0.536 | 26  | 30 |
| --             | chr4 | 189240799 | C  | T     | -- | -- | IGR    | SNP | 0.355 | 40  | 22 |
| --             | chr4 | 189240822 | C  | G     | -- | -- | IGR    | SNP | 0.408 | 42  | 29 |
| --             | chr4 | 189240957 | C  | G     | -- | -- | IGR    | SNP | 0.526 | 36  | 40 |
| --             | chr4 | 189241211 | C  | T     | -- | -- | IGR    | SNP | 0.273 | 16  | 6  |
| --             | chr4 | 189241239 | C  | T     | -- | -- | IGR    | SNP | 0.296 | 19  | 8  |
| --             | chr4 | 189241241 | C  | T     | -- | -- | IGR    | SNP | 0.286 | 20  | 8  |
| --             | chr4 | 189241428 | C  | G     | -- | -- | IGR    | SNP | 0.492 | 30  | 29 |
| --             | chr4 | 189241678 | C  | G     | -- | -- | IGR    | SNP | 0.463 | 44  | 38 |
| --             | chr4 | 189241719 | C  | G     | -- | -- | IGR    | SNP | 0.543 | 37  | 44 |
| --             | chr4 | 189241938 | C  | G     | -- | -- | IGR    | SNP | 0.518 | 40  | 43 |
| --             | chr4 | 189243212 | C  | A     | -- | -- | IGR    | SNP | 0.360 | 48  | 27 |
| --             | chr4 | 189251926 | C  | A     | -- | -- | IGR    | SNP | 0.305 | 41  | 18 |
| --             | chr4 | 189278421 | G  | A     | -- | -- | IGR    | SNP | 0.651 | 15  | 28 |
| --             | chr4 | 189300554 | C  | T     | -- | -- | IGR    | SNP | 0.175 | 47  | 10 |
| --             | chr4 | 189300565 | C  | T     | -- | -- | IGR    | SNP | 0.250 | 45  | 15 |
| --             | chr4 | 189300659 | C  | G     | -- | -- | IGR    | SNP | 0.523 | 52  | 57 |
| --             | chr4 | 189300679 | C  | A     | -- | -- | IGR    | SNP | 0.496 | 58  | 57 |
| --             | chr4 | 189300802 | C  | T     | -- | -- | IGR    | SNP | 0.537 | 57  | 66 |
| --             | chr4 | 189300949 | C  | G     | -- | -- | IGR    | SNP | 0.267 | 63  | 23 |
| --             | chr4 | 189300972 | C  | T     | -- | -- | IGR    | SNP | 0.220 | 64  | 18 |
| --             | chr4 | 189301026 | C  | G     | -- | -- | IGR    | SNP | 0.247 | 55  | 18 |
| --             | chr4 | 189301079 | -  | AT    | -- | -- | IGR    | INS | 0.470 | 44  | 39 |
| --             | chr4 | 189301086 | C  | G     | -- | -- | IGR    | SNP | 0.403 | 40  | 27 |
| --             | chr4 | 189326567 | T  | C     | -- | -- | IGR    | SNP | 0.103 | 78  | 9  |
| --             | chr4 | 189659625 | C  | T     | -- | -- | IGR    | SNP | 0.143 | 36  | 6  |
| --             | chr4 | 189694437 | T  | A     | -- | -- | IGR    | SNP | 0.267 | 11  | 4  |
| --             | chr4 | 189741214 | T  | G     | -- | -- | IGR    | SNP | 0.265 | 25  | 9  |
| --             | chr4 | 189818370 | G  | T     | -- | -- | IGR    | SNP | 0.412 | 10  | 7  |
| --             | chr4 | 189832130 | C  | A     | -- | -- | IGR    | SNP | 0.244 | 34  | 11 |
| --             | chr4 | 189832131 | A  | C     | -- | -- | IGR    | SNP | 0.244 | 34  | 11 |
| --             | chr4 | 189957302 | G  | T     | -- | -- | IGR    | SNP | 0.235 | 39  | 12 |
| --             | chr4 | 189961437 | C  | G     | -- | -- | IGR    | SNP | 0.877 | 7   | 50 |
| --             | chr4 | 189973169 | T  | C     | -- | -- | IGR    | SNP | 0.206 | 27  | 7  |
| --             | chr4 | 190105440 | T  | C     | -- | -- | IGR    | SNP | 0.429 | 4   | 3  |
| --             | chr4 | 190155592 | G  | A     | -- | -- | IGR    | SNP | 0.300 | 21  | 9  |
| --             | chr4 | 190229098 | C  | T     | -- | -- | IGR    | SNP | 0.211 | 30  | 8  |
| --             | chr4 | 190318475 | A  | T     | -- | -- | IGR    | SNP | 0.267 | 11  | 4  |
| --             | chr4 | 190386633 | G  | T     | -- | -- | IGR    | SNP | 0.158 | 16  | 3  |
| --             | chr4 | 190386660 | A  | G     | -- | -- | IGR    | SNP | 0.211 | 15  | 4  |
| --             | chr4 | 190392519 | -  | GTTGT | -- | -- | IGR    | INS | 0.214 | 11  | 3  |
| --             | chr4 | 190417555 | G  | C     | -- | -- | IGR    | SNP | 0.135 | 32  | 5  |
| --             | chr4 | 190477223 | C  | T     | -- | -- | IGR    | SNP | 0.304 | 117 | 51 |
| --             | chr4 | 190609194 | A  | C     | -- | -- | IGR    | SNP | 0.200 | 12  | 3  |
| --             | chr4 | 190819497 | A  | G     | -- | -- | IGR    | SNP | 0.154 | 33  | 6  |
| --             | chr4 | 190824250 | C  | T     | -- | -- | IGR    | SNP | 0.100 | 72  | 8  |
| --             | chr4 | 190828776 | AC | -     | -- | -- | IGR    | DEL | 0.146 | 35  | 6  |
| --             | chr4 | 190828804 | C  | G     | -- | -- | IGR    | SNP | 0.206 | 27  | 7  |
| --             | chr4 | 190840416 | G  | A     | -- | -- | IGR    | SNP | 0.172 | 24  | 5  |
| <i>FRG1</i>    | chr4 | 190868707 | C  | T     | -- | -- | Intron | SNP | 0.152 | 39  | 7  |
| <i>FRG1</i>    | chr4 | 190872881 | C  | T     | -- | -- | Intron | SNP | 0.130 | 47  | 7  |
| <i>FRG1</i>    | chr4 | 190880872 | C  | A     | -- | -- | Intron | SNP | 0.154 | 22  | 4  |
| <i>FRG1</i>    | chr4 | 190882940 | T  | C     | -- | -- | Intron | SNP | 0.127 | 48  | 7  |
| --             | chr4 | 190905711 | -  | CA    | -- | -- | IGR    | INS | 0.250 | 12  | 4  |
| --             | chr4 | 190957468 | C  | A     | -- | -- | IGR    | SNP | 0.143 | 24  | 4  |
| --             | chr4 | 190957986 | A  | G     | -- | -- | IGR    | SNP | 0.114 | 31  | 4  |
| --             | chr4 | 190960535 | -  | TA    | -- | -- | IGR    | INS | 0.292 | 17  | 7  |
| --             | chr4 | 190963533 | C  | A     | -- | -- | IGR    | SNP | 0.164 | 46  | 9  |
| --             | chr4 | 190971136 | C  | T     | -- | -- | IGR    | SNP | 0.100 | 45  | 5  |
| --             | chr4 | 190976449 | C  | A     | -- | -- | IGR    | SNP | 0.323 | 21  | 10 |
| --             | chr5 | 50080     | T  | A     | -- | -- | IGR    | SNP | 0.300 | 21  | 9  |
| --             | chr5 | 60051     | A  | T     | -- | -- | IGR    | SNP | 0.462 | 7   | 6  |
| --             | chr5 | 84574     | A  | G     | -- | -- | IGR    | SNP | 0.176 | 28  | 6  |
| --             | chr5 | 84604     | A  | G     | -- | -- | IGR    | SNP | 0.139 | 31  | 5  |
| <i>CCDC127</i> | chr5 | 211857    | C  | T     | -- | -- | Intron | SNP | 0.348 | 15  | 8  |
| <i>CCDC127</i> | chr5 | 212028    | A  | G     | -- | -- | Intron | SNP | 0.160 | 21  | 4  |
| <i>SDHA</i>    | chr5 | 253946    | C  | A     | -- | -- | Intron | SNP | 0.154 | 22  | 4  |
| --             | chr5 | 259842    | T  | C     | -- | -- | IGR    | SNP | 0.192 | 21  | 5  |
| <i>SLC9A3</i>  | chr5 | 494996    | C  | A     | -- | -- | Intron | SNP | 0.306 | 43  | 19 |
| --             | chr5 | 553690    | -  | TA    | -- | -- | IGR    | INS | 0.200 | 28  | 7  |
| <i>CEP72</i>   | chr5 | 649836    | C  | T     | -- | -- | Intron | SNP | 0.175 | 47  | 10 |
| <i>TPPP</i>    | chr5 | 682896    | G  | C     | -- | -- | Intron | SNP | 0.130 | 60  | 9  |
| <i>TPPP</i>    | chr5 | 684083    | G  | A     | -- | -- | Intron | SNP | 0.167 | 40  | 8  |
| <i>TPPP</i>    | chr5 | 684087    | C  | T     | -- | -- | Intron | SNP | 0.157 | 43  | 8  |
| <i>ZDHHC11</i> | chr5 | 811147    | A  | T     | -- | -- | Intron | SNP | 0.208 | 19  | 5  |
| <i>ZDHHC11</i> | chr5 | 813984    | G  | T     | -- | -- | Intron | SNP | 0.413 | 27  | 19 |

|                  |      |         |    |     |    |    |        |     |       |     |    |
|------------------|------|---------|----|-----|----|----|--------|-----|-------|-----|----|
| --               | chr5 | 858494  | C  | T   | -- | -- | IGR    | SNP | 0.271 | 35  | 13 |
| <i>NKD2</i>      | chr5 | 1022336 | T  | C   | -- | -- | Intron | SNP | 0.109 | 49  | 6  |
| <i>NKD2</i>      | chr5 | 1022527 | A  | G   | -- | -- | Intron | SNP | 0.148 | 52  | 9  |
| <i>NKD2</i>      | chr5 | 1024749 | G  | T   | -- | -- | Intron | SNP | 0.143 | 24  | 4  |
| <i>NKD2</i>      | chr5 | 1025741 | C  | T   | -- | -- | Intron | SNP | 0.154 | 22  | 4  |
| --               | chr5 | 1176021 | G  | A   | -- | -- | IGR    | SNP | 0.212 | 26  | 7  |
| <i>TERT</i>      | chr5 | 1289437 | A  | G   | -- | -- | Intron | SNP | 0.111 | 40  | 5  |
| <i>TERT</i>      | chr5 | 1290662 | C  | T   | -- | -- | Intron | SNP | 0.171 | 29  | 6  |
| <i>CLPTM1L</i>   | chr5 | 1327258 | T  | C   | -- | -- | Intron | SNP | 0.100 | 63  | 7  |
| <i>CLPTM1L</i>   | chr5 | 1327280 | G  | A   | -- | -- | Intron | SNP | 0.100 | 54  | 6  |
| <i>CLPTM1L</i>   | chr5 | 1328157 | C  | T   | -- | -- | Intron | SNP | 0.188 | 26  | 6  |
| <i>CLPTM1L</i>   | chr5 | 1328179 | A  | G   | -- | -- | Intron | SNP | 0.156 | 27  | 5  |
| <i>CLPTM1L</i>   | chr5 | 1328180 | C  | G   | -- | -- | Intron | SNP | 0.156 | 27  | 5  |
| <i>SLC6A3</i>    | chr5 | 1422707 | C  | T   | -- | -- | Intron | SNP | 0.304 | 64  | 28 |
| --               | chr5 | 1459227 | G  | T   | -- | -- | IGR    | SNP | 0.281 | 23  | 9  |
| --               | chr5 | 1459774 | -  | CAT | -- | -- | IGR    | INS | 0.117 | 151 | 20 |
| <i>SDHAP3</i>    | chr5 | 1574970 | G  | T   | -- | -- | RNA    | SNP | 0.235 | 13  | 4  |
| <i>LOC28613</i>  | chr5 | 1633798 | A  | C   | -- | -- | RNA    | SNP | 0.214 | 11  | 3  |
| --               | chr5 | 1730294 | A  | T   | -- | -- | IGR    | SNP | 0.221 | 53  | 15 |
| --               | chr5 | 2005038 | T  | C   | -- | -- | IGR    | SNP | 0.194 | 50  | 12 |
| --               | chr5 | 2079642 | C  | T   | -- | -- | IGR    | SNP | 0.161 | 26  | 5  |
| --               | chr5 | 2145563 | C  | A   | -- | -- | IGR    | SNP | 0.103 | 35  | 4  |
| --               | chr5 | 2146356 | C  | G   | -- | -- | IGR    | SNP | 0.333 | 10  | 5  |
| --               | chr5 | 2146380 | C  | T   | -- | -- | IGR    | SNP | 0.250 | 12  | 4  |
| --               | chr5 | 2146401 | C  | G   | -- | -- | IGR    | SNP | 0.222 | 14  | 4  |
| --               | chr5 | 2269075 | A  | C   | -- | -- | IGR    | SNP | 0.230 | 47  | 14 |
| --               | chr5 | 2364560 | C  | A   | -- | -- | IGR    | SNP | 0.375 | 55  | 33 |
| --               | chr5 | 2440129 | C  | T   | -- | -- | IGR    | SNP | 0.278 | 96  | 37 |
| --               | chr5 | 2448283 | G  | A   | -- | -- | IGR    | SNP | 0.123 | 57  | 8  |
| --               | chr5 | 2457275 | T  | G   | -- | -- | IGR    | SNP | 0.420 | 40  | 29 |
| --               | chr5 | 2491192 | G  | A   | -- | -- | IGR    | SNP | 0.267 | 11  | 4  |
| --               | chr5 | 2652294 | T  | A   | -- | -- | IGR    | SNP | 0.295 | 31  | 13 |
| --               | chr5 | 2704934 | G  | C   | -- | -- | IGR    | SNP | 0.213 | 63  | 17 |
| --               | chr5 | 2769272 | G  | A   | -- | -- | IGR    | SNP | 0.143 | 24  | 4  |
| --               | chr5 | 2880645 | A  | G   | -- | -- | IGR    | SNP | 0.333 | 26  | 13 |
| --               | chr5 | 3139870 | C  | G   | -- | -- | IGR    | SNP | 0.313 | 44  | 20 |
| --               | chr5 | 3184288 | G  | C   | -- | -- | IGR    | SNP | 0.232 | 43  | 13 |
| --               | chr5 | 3247394 | T  | G   | -- | -- | IGR    | SNP | 0.318 | 30  | 14 |
| <i>LOC285577</i> | chr5 | 3502337 | T  | A   | -- | -- | RNA    | SNP | 0.214 | 22  | 6  |
| <i>LOC285577</i> | chr5 | 3526917 | T  | A   | -- | -- | RNA    | SNP | 0.304 | 39  | 17 |
| --               | chr5 | 3592932 | C  | T   | -- | -- | IGR    | SNP | 0.165 | 81  | 16 |
| --               | chr5 | 3637920 | G  | A   | -- | -- | IGR    | SNP | 0.129 | 27  | 4  |
| --               | chr5 | 3760010 | C  | T   | -- | -- | IGR    | SNP | 0.488 | 22  | 21 |
| --               | chr5 | 3787655 | C  | G   | -- | -- | IGR    | SNP | 0.192 | 42  | 10 |
| --               | chr5 | 3787656 | C  | A   | -- | -- | IGR    | SNP | 0.192 | 42  | 10 |
| --               | chr5 | 3790173 | G  | T   | -- | -- | IGR    | SNP | 0.288 | 52  | 21 |
| --               | chr5 | 3815218 | T  | G   | -- | -- | IGR    | SNP | 0.254 | 50  | 17 |
| --               | chr5 | 3847647 | C  | G   | -- | -- | IGR    | SNP | 0.279 | 44  | 17 |
| --               | chr5 | 3924295 | A  | T   | -- | -- | IGR    | SNP | 0.169 | 59  | 12 |
| --               | chr5 | 3953386 | G  | T   | -- | -- | IGR    | SNP | 0.160 | 21  | 4  |
| --               | chr5 | 3958384 | C  | T   | -- | -- | IGR    | SNP | 0.230 | 67  | 20 |
| --               | chr5 | 3968688 | G  | A   | -- | -- | IGR    | SNP | 0.346 | 34  | 18 |
| --               | chr5 | 3985983 | C  | A   | -- | -- | IGR    | SNP | 0.161 | 52  | 10 |
| --               | chr5 | 3989401 | G  | T   | -- | -- | IGR    | SNP | 0.100 | 36  | 4  |
| --               | chr5 | 4073376 | C  | T   | -- | -- | IGR    | SNP | 0.521 | 23  | 25 |
| --               | chr5 | 4119640 | C  | A   | -- | -- | IGR    | SNP | 0.241 | 63  | 20 |
| --               | chr5 | 4151436 | G  | A   | -- | -- | IGR    | SNP | 0.375 | 25  | 15 |
| --               | chr5 | 4320291 | T  | C   | -- | -- | IGR    | SNP | 0.211 | 45  | 12 |
| --               | chr5 | 4403411 | A  | G   | -- | -- | IGR    | SNP | 0.333 | 34  | 17 |
| --               | chr5 | 4418041 | T  | G   | -- | -- | IGR    | SNP | 0.214 | 33  | 9  |
| --               | chr5 | 4523566 | C  | T   | -- | -- | IGR    | SNP | 0.175 | 80  | 17 |
| --               | chr5 | 4647754 | T  | C   | -- | -- | IGR    | SNP | 0.493 | 34  | 33 |
| --               | chr5 | 4723191 | C  | G   | -- | -- | IGR    | SNP | 0.483 | 31  | 29 |
| --               | chr5 | 4751308 | G  | A   | -- | -- | IGR    | SNP | 0.283 | 33  | 13 |
| --               | chr5 | 4916406 | TA | -   | -- | -- | IGR    | DEL | 0.163 | 36  | 7  |
| --               | chr5 | 4957800 | G  | C   | -- | -- | IGR    | SNP | 0.197 | 57  | 14 |
| --               | chr5 | 5009455 | A  | T   | -- | -- | IGR    | SNP | 0.116 | 61  | 8  |
| --               | chr5 | 5073077 | T  | C   | -- | -- | IGR    | SNP | 0.311 | 42  | 19 |
| <i>ADAMTS16</i>  | chr5 | 5225605 | G  | C   | -- | -- | Intron | SNP | 0.302 | 44  | 19 |
| <i>ADAMTS16</i>  | chr5 | 5227061 | C  | G   | -- | -- | Intron | SNP | 0.169 | 59  | 12 |
| <i>ADAMTS16</i>  | chr5 | 5291626 | G  | T   | -- | -- | Intron | SNP | 0.424 | 19  | 14 |
| --               | chr5 | 5537165 | G  | C   | -- | -- | IGR    | SNP | 0.280 | 67  | 26 |
| --               | chr5 | 5586641 | G  | A   | -- | -- | IGR    | SNP | 0.246 | 43  | 14 |
| --               | chr5 | 5610466 | T  | G   | -- | -- | IGR    | SNP | 0.318 | 45  | 21 |
| --               | chr5 | 5833727 | C  | T   | -- | -- | IGR    | SNP | 0.500 | 38  | 38 |
| --               | chr5 | 5894883 | T  | A   | -- | -- | IGR    | SNP | 0.351 | 50  | 27 |
| --               | chr5 | 5937991 | C  | A   | -- | -- | IGR    | SNP | 0.221 | 60  | 17 |
| --               | chr5 | 6064667 | T  | C   | -- | -- | IGR    | SNP | 0.222 | 42  | 12 |
| --               | chr5 | 6087311 | C  | G   | -- | -- | IGR    | SNP | 0.448 | 48  | 39 |
| --               | chr5 | 6258315 | C  | A   | -- | -- | IGR    | SNP | 0.596 | 38  | 56 |



|                  |      |          |       |   |        |       |                 |     |       |    |    |
|------------------|------|----------|-------|---|--------|-------|-----------------|-----|-------|----|----|
| --               | chr5 | 6422872  | C     | T | --     | --    | IGR             | SNP | 0.581 | 13 | 18 |
| <i>UBE2QL1</i>   | chr5 | 6466748  | C     | T | --     | --    | Intron          | SNP | 0.130 | 94 | 14 |
| --               | chr5 | 6767305  | C     | G | --     | --    | IGR             | SNP | 0.682 | 21 | 45 |
| --               | chr5 | 6878055  | TCCTC | - | --     | --    | IGR             | DEL | 0.281 | 41 | 16 |
| --               | chr5 | 6971349  | A     | G | --     | --    | IGR             | SNP | 0.286 | 15 | 6  |
| --               | chr5 | 6971394  | C     | G | --     | --    | IGR             | SNP | 0.214 | 11 | 3  |
| --               | chr5 | 7004154  | G     | C | --     | --    | IGR             | SNP | 0.619 | 16 | 26 |
| --               | chr5 | 7016658  | G     | T | --     | --    | IGR             | SNP | 0.115 | 54 | 7  |
| --               | chr5 | 7056255  | C     | T | --     | --    | IGR             | SNP | 0.267 | 33 | 12 |
| --               | chr5 | 7162538  | T     | A | --     | --    | IGR             | SNP | 0.224 | 38 | 11 |
| --               | chr5 | 7173305  | G     | A | --     | --    | IGR             | SNP | 0.235 | 13 | 4  |
| --               | chr5 | 7256692  | G     | T | --     | --    | IGR             | SNP | 0.200 | 36 | 9  |
| --               | chr5 | 7311434  | G     | T | --     | --    | IGR             | SNP | 0.205 | 31 | 8  |
| --               | chr5 | 7319940  | T     | A | --     | --    | IGR             | SNP | 0.130 | 40 | 6  |
| --               | chr5 | 7944025  | G     | T | --     | --    | IGR             | SNP | 0.117 | 53 | 7  |
| --               | chr5 | 8017792  | C     | G | --     | --    | IGR             | SNP | 0.263 | 42 | 15 |
| --               | chr5 | 8049980  | AG    | - | --     | --    | IGR             | DEL | 0.217 | 18 | 5  |
| --               | chr5 | 8174754  | A     | G | --     | --    | IGR             | SNP | 0.288 | 37 | 15 |
| --               | chr5 | 8185722  | C     | G | --     | --    | IGR             | SNP | 0.742 | 8  | 23 |
| --               | chr5 | 8596706  | C     | G | --     | --    | IGR             | SNP | 0.167 | 45 | 9  |
| --               | chr5 | 8637064  | G     | T | --     | --    | IGR             | SNP | 0.234 | 36 | 11 |
| --               | chr5 | 8682591  | G     | T | --     | --    | IGR             | SNP | 0.250 | 42 | 14 |
| --               | chr5 | 8729227  | T     | G | --     | --    | IGR             | SNP | 0.290 | 22 | 9  |
| --               | chr5 | 8878399  | G     | T | --     | --    | IGR             | SNP | 0.400 | 24 | 16 |
| --               | chr5 | 9023388  | A     | C | --     | --    | IGR             | SNP | 0.182 | 27 | 6  |
| <i>SEMA5A</i>    | chr5 | 9109715  | C     | A | --     | --    | Intron          | SNP | 0.258 | 49 | 17 |
| <i>SEMA5A</i>    | chr5 | 9278796  | T     | G | --     | --    | Intron          | SNP | 0.151 | 45 | 8  |
| <i>SEMA5A</i>    | chr5 | 9300253  | C     | A | --     | --    | Intron          | SNP | 0.161 | 52 | 10 |
| <i>SEMA5A</i>    | chr5 | 9300616  | C     | T | --     | --    | Intron          | SNP | 0.135 | 32 | 5  |
| <i>SEMA5A</i>    | chr5 | 9384794  | TAG   | - | --     | --    | Intron          | DEL | 0.127 | 48 | 7  |
| <i>SEMA5A</i>    | chr5 | 9466510  | AAG   | - | --     | --    | Intron          | DEL | 0.107 | 24 | 3  |
| <i>LOC285692</i> | chr5 | 9731301  | C     | T | --     | --    | RNA             | SNP | 0.135 | 45 | 7  |
| --               | chr5 | 9919059  | G     | A | --     | --    | IGR             | SNP | 0.273 | 32 | 12 |
| --               | chr5 | 10028088 | G     | A | --     | --    | IGR             | SNP | 0.230 | 47 | 14 |
| --               | chr5 | 10046654 | C     | T | --     | --    | IGR             | SNP | 0.222 | 28 | 8  |
| --               | chr5 | 10335213 | G     | T | --     | --    | IGR             | SNP | 0.451 | 28 | 23 |
| --               | chr5 | 10513041 | CT    | - | --     | --    | IGR             | DEL | 0.182 | 18 | 4  |
| <i>ANKRD33B</i>  | chr5 | 10620790 | C     | T | --     | --    | Intron          | SNP | 0.600 | 20 | 30 |
| --               | chr5 | 10797031 | C     | G | --     | --    | IGR             | SNP | 0.224 | 52 | 15 |
| --               | chr5 | 10816871 | A     | T | --     | --    | IGR             | SNP | 0.360 | 32 | 18 |
| <i>CTNND2</i>    | chr5 | 10998926 | A     | G | --     | --    | Intron          | SNP | 0.309 | 38 | 17 |
| <i>CTNND2</i>    | chr5 | 11016891 | T     | A | --     | --    | Intron          | SNP | 0.354 | 31 | 17 |
| <i>CTNND2</i>    | chr5 | 11159794 | C     | T | G2053A | A685T | Missense_mutati | SNP | 0.339 | 39 | 20 |
| <i>CTNND2</i>    | chr5 | 11253927 | C     | T | --     | --    | Intron          | SNP | 0.235 | 39 | 12 |
| <i>CTNND2</i>    | chr5 | 11332387 | C     | A | --     | --    | Intron          | SNP | 0.200 | 16 | 4  |
| <i>CTNND2</i>    | chr5 | 11591291 | C     | T | --     | --    | Intron          | SNP | 0.655 | 20 | 38 |
| --               | chr5 | 11980308 | A     | T | --     | --    | IGR             | SNP | 0.250 | 33 | 11 |
| --               | chr5 | 12080422 | A     | G | --     | --    | IGR             | SNP | 0.341 | 27 | 14 |
| --               | chr5 | 12107181 | C     | G | --     | --    | IGR             | SNP | 0.217 | 36 | 10 |
| --               | chr5 | 12202269 | CAT   | - | --     | --    | IGR             | DEL | 0.125 | 21 | 3  |
| --               | chr5 | 12245735 | G     | C | --     | --    | IGR             | SNP | 0.545 | 30 | 36 |
| --               | chr5 | 12263374 | T     | G | --     | --    | IGR             | SNP | 0.209 | 34 | 9  |
| --               | chr5 | 12370320 | G     | A | --     | --    | IGR             | SNP | 0.222 | 14 | 4  |
| --               | chr5 | 12393003 | T     | C | --     | --    | IGR             | SNP | 0.490 | 25 | 24 |
| --               | chr5 | 12404183 | C     | A | --     | --    | IGR             | SNP | 0.234 | 36 | 11 |
| <i>TAG</i>       | chr5 | 12574276 | A     | C | --     | --    | 5'Flank         | SNP | 0.143 | 30 | 5  |
| <i>TAG</i>       | chr5 | 12580387 | G     | T | --     | --    | RNA             | SNP | 0.596 | 19 | 28 |
| <i>TAG</i>       | chr5 | 12625772 | C     | T | --     | --    | RNA             | SNP | 0.255 | 41 | 14 |
| <i>TAG</i>       | chr5 | 12657180 | A     | T | --     | --    | RNA             | SNP | 0.200 | 28 | 7  |
| --               | chr5 | 12852027 | CCA   | - | --     | --    | IGR             | DEL | 0.265 | 50 | 18 |
| --               | chr5 | 13158421 | C     | T | --     | --    | IGR             | SNP | 0.316 | 39 | 18 |
| --               | chr5 | 13377452 | G     | A | --     | --    | IGR             | SNP | 0.210 | 49 | 13 |
| <i>TRIO</i>      | chr5 | 14175331 | C     | T | --     | --    | Intron          | SNP | 0.191 | 38 | 9  |
| <i>TRIO</i>      | chr5 | 14175712 | C     | G | --     | --    | Intron          | SNP | 0.140 | 37 | 6  |
| <i>TRIO</i>      | chr5 | 14175805 | G     | T | --     | --    | Intron          | SNP | 0.300 | 28 | 12 |
| <i>TRIO</i>      | chr5 | 14255349 | T     | C | --     | --    | Intron          | SNP | 0.164 | 46 | 9  |
| <i>TRIO</i>      | chr5 | 14386320 | G     | T | --     | --    | Intron          | SNP | 0.283 | 33 | 13 |
| <i>TRIO</i>      | chr5 | 14430345 | T     | A | --     | --    | Intron          | SNP | 0.114 | 31 | 4  |
| --               | chr5 | 14940545 | T     | G | --     | --    | IGR             | SNP | 0.182 | 36 | 8  |
| --               | chr5 | 15074219 | G     | T | --     | --    | IGR             | SNP | 0.297 | 45 | 19 |
| --               | chr5 | 15243862 | C     | G | --     | --    | IGR             | SNP | 0.703 | 19 | 45 |
| --               | chr5 | 15302036 | C     | G | --     | --    | IGR             | SNP | 0.319 | 32 | 15 |
| --               | chr5 | 15460240 | G     | A | --     | --    | IGR             | SNP | 0.213 | 37 | 10 |
| <i>FBXL7</i>     | chr5 | 15502380 | G     | T | --     | --    | Intron          | SNP | 0.458 | 13 | 11 |
| <i>FBXL7</i>     | chr5 | 15552931 | G     | A | --     | --    | Intron          | SNP | 0.161 | 52 | 10 |
| <i>FBXL7</i>     | chr5 | 15565946 | C     | T | --     | --    | Intron          | SNP | 0.463 | 29 | 25 |
| <i>FBXL7</i>     | chr5 | 15603742 | A     | T | --     | --    | Intron          | SNP | 0.171 | 58 | 12 |
| <i>FBXL7</i>     | chr5 | 15833155 | C     | G | --     | --    | Intron          | SNP | 0.281 | 46 | 18 |
| --               | chr5 | 16327536 | A     | C | --     | --    | IGR             | SNP | 0.220 | 32 | 9  |
| --               | chr5 | 16382645 | G     | A | --     | --    | IGR             | SNP | 0.685 | 17 | 37 |

|                  |      |          |      |     |    |    |        |     |       |     |    |
|------------------|------|----------|------|-----|----|----|--------|-----|-------|-----|----|
| --               | chr5 | 16434868 | C    | A   | -- | -- | IGR    | SNP | 0.244 | 31  | 10 |
| <i>FAM134B</i>   | chr5 | 16586793 | C    | A   | -- | -- | Intron | SNP | 0.276 | 42  | 16 |
| --               | chr5 | 16631382 | T    | A   | -- | -- | IGR    | SNP | 0.167 | 20  | 4  |
| <i>MYO10</i>     | chr5 | 16917444 | A    | G   | -- | -- | Intron | SNP | 0.183 | 49  | 11 |
| <i>LOC285696</i> | chr5 | 17193189 | C    | T   | -- | -- | RNA    | SNP | 0.333 | 6   | 3  |
| --               | chr5 | 17434798 | T    | C   | -- | -- | IGR    | SNP | 0.100 | 27  | 3  |
| --               | chr5 | 17672400 | C    | G   | -- | -- | IGR    | SNP | 0.327 | 33  | 16 |
| --               | chr5 | 17713563 | A    | T   | -- | -- | IGR    | SNP | 0.277 | 115 | 44 |
| --               | chr5 | 17788930 | A    | T   | -- | -- | IGR    | SNP | 0.400 | 24  | 16 |
| --               | chr5 | 17887478 | T    | A   | -- | -- | IGR    | SNP | 0.394 | 20  | 13 |
| --               | chr5 | 18200086 | C    | T   | -- | -- | IGR    | SNP | 0.516 | 15  | 16 |
| --               | chr5 | 18306703 | C    | T   | -- | -- | IGR    | SNP | 0.259 | 40  | 14 |
| --               | chr5 | 18382501 | A    | G   | -- | -- | IGR    | SNP | 0.209 | 34  | 9  |
| --               | chr5 | 18538505 | -    | AAG | -- | -- | IGR    | INS | 0.111 | 16  | 2  |
| --               | chr5 | 18671376 | C    | T   | -- | -- | IGR    | SNP | 0.115 | 46  | 6  |
| <i>CDH18</i>     | chr5 | 19638245 | G    | C   | -- | -- | Intron | SNP | 0.518 | 27  | 29 |
| <i>CDH18</i>     | chr5 | 19656619 | G    | A   | -- | -- | Intron | SNP | 0.122 | 36  | 5  |
| <i>CDH18</i>     | chr5 | 19687653 | T    | C   | -- | -- | Intron | SNP | 0.253 | 71  | 24 |
| <i>CDH18</i>     | chr5 | 19720322 | G    | A   | -- | -- | Intron | SNP | 0.235 | 52  | 16 |
| --               | chr5 | 20025968 | C    | T   | -- | -- | IGR    | SNP | 0.673 | 16  | 33 |
| --               | chr5 | 20076607 | G    | T   | -- | -- | IGR    | SNP | 0.250 | 27  | 9  |
| --               | chr5 | 20124708 | C    | A   | -- | -- | IGR    | SNP | 0.500 | 33  | 33 |
| --               | chr5 | 20195998 | C    | T   | -- | -- | IGR    | SNP | 0.206 | 50  | 13 |
| --               | chr5 | 20253796 | C    | G   | -- | -- | IGR    | SNP | 0.283 | 33  | 13 |
| --               | chr5 | 20317114 | A    | G   | -- | -- | IGR    | SNP | 0.273 | 24  | 9  |
| --               | chr5 | 20367836 | C    | G   | -- | -- | IGR    | SNP | 0.196 | 37  | 9  |
| --               | chr5 | 20426605 | G    | C   | -- | -- | IGR    | SNP | 0.286 | 30  | 12 |
| --               | chr5 | 20690715 | A    | G   | -- | -- | IGR    | SNP | 0.167 | 55  | 11 |
| --               | chr5 | 20705555 | CAT  | -   | -- | -- | IGR    | DEL | 0.111 | 24  | 3  |
| --               | chr5 | 20739977 | C    | T   | -- | -- | IGR    | SNP | 0.128 | 41  | 6  |
| --               | chr5 | 20754024 | C    | A   | -- | -- | IGR    | SNP | 0.156 | 27  | 5  |
| --               | chr5 | 20791057 | G    | T   | -- | -- | IGR    | SNP | 0.173 | 43  | 9  |
| --               | chr5 | 20856151 | G    | T   | -- | -- | IGR    | SNP | 0.222 | 35  | 10 |
| --               | chr5 | 20871877 | A    | C   | -- | -- | IGR    | SNP | 0.106 | 42  | 5  |
| --               | chr5 | 20895878 | T    | A   | -- | -- | IGR    | SNP | 0.327 | 35  | 17 |
| --               | chr5 | 20916674 | T    | C   | -- | -- | IGR    | SNP | 0.109 | 41  | 5  |
| --               | chr5 | 21002057 | G    | A   | -- | -- | IGR    | SNP | 0.222 | 14  | 4  |
| --               | chr5 | 21073237 | C    | A   | -- | -- | IGR    | SNP | 0.220 | 39  | 11 |
| --               | chr5 | 21193986 | G    | C   | -- | -- | IGR    | SNP | 0.333 | 24  | 12 |
| --               | chr5 | 21217237 | C    | T   | -- | -- | IGR    | SNP | 0.172 | 48  | 10 |
| --               | chr5 | 21288093 | T    | C   | -- | -- | IGR    | SNP | 0.412 | 10  | 7  |
| --               | chr5 | 21294728 | A    | C   | -- | -- | IGR    | SNP | 0.294 | 24  | 10 |
| --               | chr5 | 21303763 | C    | T   | -- | -- | IGR    | SNP | 0.200 | 24  | 6  |
| --               | chr5 | 21332011 | C    | T   | -- | -- | IGR    | SNP | 0.122 | 36  | 5  |
| --               | chr5 | 21335678 | T    | C   | -- | -- | IGR    | SNP | 0.158 | 32  | 6  |
| <i>GUSBP1</i>    | chr5 | 21459888 | T    | G   | -- | -- | RNA    | SNP | 0.167 | 30  | 6  |
| <i>GUSBP1</i>    | chr5 | 21580886 | C    | A   | -- | -- | RNA    | SNP | 0.122 | 43  | 6  |
| --               | chr5 | 21651683 | C    | A   | -- | -- | IGR    | SNP | 0.227 | 17  | 5  |
| <i>CDH12</i>     | chr5 | 22046539 | C    | T   | -- | -- | Intron | SNP | 0.174 | 19  | 4  |
| <i>CDH12</i>     | chr5 | 22161644 | CATA | -   | -- | -- | Intron | DEL | 0.105 | 17  | 2  |
| <i>CDH12</i>     | chr5 | 22261844 | T    | G   | -- | -- | Intron | SNP | 0.357 | 27  | 15 |
| <i>CDH12</i>     | chr5 | 22277839 | A    | G   | -- | -- | Intron | SNP | 0.356 | 38  | 21 |
| <i>CDH12</i>     | chr5 | 22399421 | A    | G   | -- | -- | Intron | SNP | 0.185 | 44  | 10 |
| <i>CDH12</i>     | chr5 | 22469540 | C    | G   | -- | -- | Intron | SNP | 0.267 | 44  | 16 |
| <i>CDH12</i>     | chr5 | 22685549 | G    | A   | -- | -- | Intron | SNP | 0.182 | 36  | 8  |
| --               | chr5 | 22972453 | T    | C   | -- | -- | IGR    | SNP | 0.179 | 23  | 5  |
| --               | chr5 | 22992879 | G    | A   | -- | -- | IGR    | SNP | 0.262 | 31  | 11 |
| --               | chr5 | 23032428 | C    | A   | -- | -- | IGR    | SNP | 0.500 | 15  | 15 |
| --               | chr5 | 23209154 | A    | C   | -- | -- | IGR    | SNP | 0.229 | 37  | 11 |
| --               | chr5 | 23267643 | A    | G   | -- | -- | IGR    | SNP | 0.184 | 40  | 9  |
| --               | chr5 | 23267972 | C    | T   | -- | -- | IGR    | SNP | 0.395 | 26  | 17 |
| --               | chr5 | 23289032 | C    | A   | -- | -- | IGR    | SNP | 0.174 | 38  | 8  |
| --               | chr5 | 23326437 | G    | T   | -- | -- | IGR    | SNP | 0.293 | 29  | 12 |
| --               | chr5 | 23504201 | C    | A   | -- | -- | IGR    | SNP | 0.267 | 22  | 8  |
| --               | chr5 | 23534398 | A    | G   | -- | -- | IGR    | SNP | 0.167 | 30  | 6  |
| --               | chr5 | 23557989 | A    | T   | -- | -- | IGR    | SNP | 0.222 | 28  | 8  |
| --               | chr5 | 23646716 | TAG  | -   | -- | -- | IGR    | DEL | 0.107 | 25  | 3  |
| --               | chr5 | 23703404 | -    | AT  | -- | -- | IGR    | INS | 0.179 | 32  | 7  |
| --               | chr5 | 23709415 | T    | C   | -- | -- | IGR    | SNP | 0.240 | 38  | 12 |
| --               | chr5 | 23831776 | A    | G   | -- | -- | IGR    | SNP | 0.197 | 61  | 15 |
| --               | chr5 | 24107666 | T    | A   | -- | -- | IGR    | SNP | 0.184 | 31  | 7  |
| --               | chr5 | 24306434 | A    | T   | -- | -- | IGR    | SNP | 0.333 | 14  | 7  |
| --               | chr5 | 24404510 | A    | C   | -- | -- | IGR    | SNP | 0.125 | 35  | 5  |
| --               | chr5 | 24486183 | C    | A   | -- | -- | IGR    | SNP | 0.170 | 44  | 9  |
| <i>CDH10</i>     | chr5 | 24562734 | T    | A   | -- | -- | Intron | SNP | 0.121 | 29  | 4  |
| <i>CDH10</i>     | chr5 | 24564748 | G    | T   | -- | -- | Intron | SNP | 0.378 | 28  | 17 |
| <i>CDH10</i>     | chr5 | 24586566 | G    | T   | -- | -- | Intron | SNP | 0.250 | 12  | 4  |
| <i>CDH10</i>     | chr5 | 24593094 | C    | G   | -- | -- | Intron | SNP | 0.237 | 29  | 9  |
| --               | chr5 | 24649021 | G    | T   | -- | -- | IGR    | SNP | 0.297 | 45  | 19 |
| --               | chr5 | 24652824 | C    | A   | -- | -- | IGR    | SNP | 0.192 | 42  | 10 |

|          |      |          |    |     |    |    |        |     |       |    |    |
|----------|------|----------|----|-----|----|----|--------|-----|-------|----|----|
| --       | chr5 | 24690878 | T  | C   | -- | -- | IGR    | SNP | 0.282 | 28 | 11 |
| --       | chr5 | 24770381 | -  | GTA | -- | -- | IGR    | INS | 0.140 | 43 | 7  |
| --       | chr5 | 24775828 | G  | A   | -- | -- | IGR    | SNP | 0.609 | 18 | 28 |
| --       | chr5 | 24842441 | T  | A   | -- | -- | IGR    | SNP | 0.283 | 43 | 17 |
| --       | chr5 | 24853203 | T  | A   | -- | -- | IGR    | SNP | 0.429 | 24 | 18 |
| --       | chr5 | 24881717 | C  | A   | -- | -- | IGR    | SNP | 0.254 | 44 | 15 |
| --       | chr5 | 24953107 | G  | A   | -- | -- | IGR    | SNP | 0.208 | 38 | 10 |
| --       | chr5 | 24984938 | G  | A   | -- | -- | IGR    | SNP | 0.115 | 23 | 3  |
| --       | chr5 | 25043142 | C  | A   | -- | -- | IGR    | SNP | 0.328 | 41 | 20 |
| --       | chr5 | 25111371 | A  | G   | -- | -- | IGR    | SNP | 0.154 | 33 | 6  |
| --       | chr5 | 25188654 | C  | T   | -- | -- | IGR    | SNP | 0.250 | 54 | 18 |
| --       | chr5 | 25217594 | A  | C   | -- | -- | IGR    | SNP | 0.161 | 52 | 10 |
| --       | chr5 | 25303726 | A  | T   | -- | -- | IGR    | SNP | 0.273 | 24 | 9  |
| --       | chr5 | 25411539 | C  | T   | -- | -- | IGR    | SNP | 0.111 | 40 | 5  |
| --       | chr5 | 25525003 | G  | C   | -- | -- | IGR    | SNP | 0.263 | 42 | 15 |
| --       | chr5 | 25569230 | G  | T   | -- | -- | IGR    | SNP | 0.190 | 51 | 12 |
| --       | chr5 | 25617946 | C  | G   | -- | -- | IGR    | SNP | 0.146 | 35 | 6  |
| --       | chr5 | 25962055 | C  | T   | -- | -- | IGR    | SNP | 0.172 | 48 | 10 |
| --       | chr5 | 26026783 | G  | A   | -- | -- | IGR    | SNP | 0.114 | 31 | 4  |
| --       | chr5 | 26145819 | C  | T   | -- | -- | IGR    | SNP | 0.686 | 11 | 24 |
| --       | chr5 | 26181245 | A  | G   | -- | -- | IGR    | SNP | 0.457 | 25 | 21 |
| --       | chr5 | 26208295 | A  | T   | -- | -- | IGR    | SNP | 0.171 | 29 | 6  |
| --       | chr5 | 26235541 | G  | A   | -- | -- | IGR    | SNP | 0.213 | 37 | 10 |
| --       | chr5 | 26372594 | A  | G   | -- | -- | IGR    | SNP | 0.234 | 49 | 15 |
| --       | chr5 | 26417353 | G  | A   | -- | -- | IGR    | SNP | 0.300 | 42 | 18 |
| --       | chr5 | 26451746 | C  | G   | -- | -- | IGR    | SNP | 0.298 | 40 | 17 |
| --       | chr5 | 26498992 | C  | G   | -- | -- | IGR    | SNP | 0.222 | 28 | 8  |
| --       | chr5 | 26540280 | T  | C   | -- | -- | IGR    | SNP | 0.288 | 37 | 15 |
| --       | chr5 | 26540281 | C  | T   | -- | -- | IGR    | SNP | 0.288 | 37 | 15 |
| --       | chr5 | 26846862 | G  | C   | -- | -- | IGR    | SNP | 0.333 | 26 | 13 |
| CDH9     | chr5 | 26929850 | -  | GA  | -- | -- | Intron | INS | 0.382 | 47 | 29 |
| CDH9     | chr5 | 26942200 | A  | T   | -- | -- | Intron | SNP | 0.193 | 46 | 11 |
| CDH9     | chr5 | 26964564 | C  | T   | -- | -- | Intron | SNP | 0.246 | 43 | 14 |
| CDH9     | chr5 | 26987222 | A  | T   | -- | -- | Intron | SNP | 0.222 | 21 | 6  |
| --       | chr5 | 27218065 | C  | T   | -- | -- | IGR    | SNP | 0.317 | 28 | 13 |
| --       | chr5 | 27324994 | A  | G   | -- | -- | IGR    | SNP | 0.525 | 19 | 21 |
| --       | chr5 | 27457438 | A  | C   | -- | -- | IGR    | SNP | 0.326 | 31 | 15 |
| --       | chr5 | 27972781 | T  | C   | -- | -- | IGR    | SNP | 0.176 | 28 | 6  |
| --       | chr5 | 27972805 | A  | C   | -- | -- | IGR    | SNP | 0.118 | 30 | 4  |
| --       | chr5 | 28201177 | G  | A   | -- | -- | IGR    | SNP | 0.267 | 11 | 4  |
| --       | chr5 | 28636465 | A  | C   | -- | -- | IGR    | SNP | 0.246 | 46 | 15 |
| --       | chr5 | 28670505 | C  | T   | -- | -- | IGR    | SNP | 0.257 | 55 | 19 |
| --       | chr5 | 28794611 | A  | T   | -- | -- | IGR    | SNP | 0.200 | 28 | 7  |
| --       | chr5 | 28796377 | C  | T   | -- | -- | IGR    | SNP | 0.229 | 27 | 8  |
| --       | chr5 | 28799654 | AC | -   | -- | -- | IGR    | DEL | 0.188 | 13 | 3  |
| --       | chr5 | 28923914 | -  | GT  | -- | -- | IGR    | INS | 0.205 | 31 | 8  |
| --       | chr5 | 28950690 | G  | T   | -- | -- | IGR    | SNP | 0.267 | 11 | 4  |
| --       | chr5 | 29250916 | -  | TA  | -- | -- | IGR    | INS | 0.167 | 15 | 3  |
| --       | chr5 | 29412174 | C  | A   | -- | -- | IGR    | SNP | 0.182 | 45 | 10 |
| --       | chr5 | 29718813 | C  | A   | -- | -- | IGR    | SNP | 0.211 | 15 | 4  |
| --       | chr5 | 29725242 | C  | G   | -- | -- | IGR    | SNP | 0.204 | 43 | 11 |
| --       | chr5 | 29883771 | G  | T   | -- | -- | IGR    | SNP | 0.281 | 23 | 9  |
| --       | chr5 | 29887823 | G  | T   | -- | -- | IGR    | SNP | 0.359 | 25 | 14 |
| --       | chr5 | 30618365 | T  | C   | -- | -- | IGR    | SNP | 0.654 | 9  | 17 |
| --       | chr5 | 30628844 | -  | CAT | -- | -- | IGR    | INS | 0.250 | 12 | 4  |
| --       | chr5 | 30725545 | A  | C   | -- | -- | IGR    | SNP | 0.129 | 27 | 4  |
| --       | chr5 | 30787797 | C  | T   | -- | -- | IGR    | SNP | 0.600 | 8  | 12 |
| CDH6     | chr5 | 31245582 | C  | A   | -- | -- | Intron | SNP | 0.192 | 21 | 5  |
| DROSHA   | chr5 | 31470867 | C  | A   | -- | -- | Intron | SNP | 0.258 | 23 | 8  |
| PDZD2    | chr5 | 31843149 | G  | A   | -- | -- | Intron | SNP | 0.171 | 29 | 6  |
| PDZD2    | chr5 | 31850761 | G  | T   | -- | -- | Intron | SNP | 0.182 | 18 | 4  |
| PDZD2    | chr5 | 32053537 | C  | T   | -- | -- | Intron | SNP | 0.262 | 45 | 16 |
| --       | chr5 | 32184566 | C  | A   | -- | -- | IGR    | SNP | 0.208 | 42 | 11 |
| --       | chr5 | 32184567 | A  | C   | -- | -- | IGR    | SNP | 0.212 | 41 | 11 |
| --       | chr5 | 32317179 | C  | T   | -- | -- | IGR    | SNP | 0.233 | 79 | 24 |
| --       | chr5 | 32474424 | C  | T   | -- | -- | IGR    | SNP | 0.277 | 60 | 23 |
| --       | chr5 | 32475404 | C  | A   | -- | -- | IGR    | SNP | 0.133 | 26 | 4  |
| --       | chr5 | 32558038 | C  | T   | -- | -- | IGR    | SNP | 0.234 | 36 | 11 |
| --       | chr5 | 32650724 | G  | T   | -- | -- | IGR    | SNP | 0.125 | 35 | 5  |
| --       | chr5 | 32803943 | T  | A   | -- | -- | IGR    | SNP | 0.141 | 55 | 9  |
| --       | chr5 | 32879354 | A  | G   | -- | -- | IGR    | SNP | 0.268 | 30 | 11 |
| --       | chr5 | 33262111 | A  | T   | -- | -- | IGR    | SNP | 0.118 | 30 | 4  |
| --       | chr5 | 33415602 | G  | A   | -- | -- | IGR    | SNP | 0.148 | 23 | 4  |
| --       | chr5 | 33415605 | T  | A   | -- | -- | IGR    | SNP | 0.138 | 25 | 4  |
| --       | chr5 | 33515917 | G  | A   | -- | -- | IGR    | SNP | 0.108 | 33 | 4  |
| ADAMTS12 | chr5 | 33545980 | G  | C   | -- | -- | Intron | SNP | 0.171 | 29 | 6  |
| ADAMTS12 | chr5 | 33558469 | T  | G   | -- | -- | Intron | SNP | 0.133 | 52 | 8  |
| ADAMTS12 | chr5 | 33721971 | T  | A   | -- | -- | Intron | SNP | 0.167 | 50 | 10 |
| ADAMTS12 | chr5 | 33798502 | G  | T   | -- | -- | Intron | SNP | 0.139 | 31 | 5  |
| ADAMTS12 | chr5 | 33830776 | A  | C   | -- | -- | Intron | SNP | 0.179 | 32 | 7  |

|                   |      |          |     |   |    |    |        |     |       |    |    |
|-------------------|------|----------|-----|---|----|----|--------|-----|-------|----|----|
| <i>C1QTNF3-AM</i> | chr5 | 34050803 | C   | A | -- | -- | RNA    | SNP | 0.458 | 32 | 27 |
| --                | chr5 | 34358155 | T   | G | -- | -- | IGR    | SNP | 0.128 | 41 | 6  |
| --                | chr5 | 34404261 | T   | C | -- | -- | IGR    | SNP | 0.117 | 53 | 7  |
| <i>RAI14</i>      | chr5 | 34709234 | C   | T | -- | -- | Intron | SNP | 0.192 | 21 | 5  |
| <i>RAI14</i>      | chr5 | 34743462 | C   | G | -- | -- | Intron | SNP | 0.179 | 64 | 14 |
| <i>RAI14</i>      | chr5 | 34752854 | G   | A | -- | -- | Intron | SNP | 0.192 | 21 | 5  |
| <i>AGXT2</i>      | chr5 | 35032008 | G   | T | -- | -- | Intron | SNP | 0.211 | 15 | 4  |
| <i>PRLR</i>       | chr5 | 35110968 | G   | T | -- | -- | Intron | SNP | 0.109 | 41 | 5  |
| <i>PRLR</i>       | chr5 | 35137661 | T   | C | -- | -- | Intron | SNP | 0.286 | 45 | 18 |
| <i>PRLR</i>       | chr5 | 35215978 | A   | G | -- | -- | Intron | SNP | 0.176 | 28 | 6  |
| --                | chr5 | 35327523 | T   | A | -- | -- | IGR    | SNP | 0.152 | 56 | 10 |
| --                | chr5 | 35474109 | G   | T | -- | -- | IGR    | SNP | 0.174 | 19 | 4  |
| --                | chr5 | 35535462 | C   | T | -- | -- | IGR    | SNP | 0.592 | 20 | 29 |
| <i>SPEF2</i>      | chr5 | 35663604 | G   | T | -- | -- | Intron | SNP | 0.254 | 50 | 17 |
| <i>SPEF2</i>      | chr5 | 35673243 | C   | A | -- | -- | Intron | SNP | 0.239 | 54 | 17 |
| <i>SPEF2</i>      | chr5 | 35729827 | A   | G | -- | -- | Intron | SNP | 0.133 | 72 | 11 |
| <i>SPEF2</i>      | chr5 | 35736571 | AGT | - | -- | -- | Intron | DEL | 0.105 | 50 | 6  |
| <i>SPEF2</i>      | chr5 | 35784825 | G   | T | -- | -- | Intron | SNP | 0.375 | 35 | 21 |
| --                | chr5 | 35901892 | G   | C | -- | -- | IGR    | SNP | 0.156 | 38 | 7  |
| --                | chr5 | 36022038 | G   | A | -- | -- | IGR    | SNP | 0.167 | 35 | 7  |
| --                | chr5 | 36690436 | G   | T | -- | -- | IGR    | SNP | 0.200 | 28 | 7  |
| <i>C5orf42</i>    | chr5 | 37170503 | C   | A | -- | -- | Intron | SNP | 0.212 | 41 | 11 |
| <i>C5orf42</i>    | chr5 | 37192974 | C   | A | -- | -- | Intron | SNP | 0.500 | 5  | 5  |
| <i>C5orf42</i>    | chr5 | 37240316 | G   | A | -- | -- | Intron | SNP | 0.220 | 46 | 13 |
| <i>WDR70</i>      | chr5 | 37416340 | C   | G | -- | -- | Intron | SNP | 0.139 | 31 | 5  |
| <i>WDR70</i>      | chr5 | 37416509 | A   | G | -- | -- | Intron | SNP | 0.116 | 38 | 5  |
| <i>GDNF</i>       | chr5 | 37821291 | C   | T | -- | -- | Intron | SNP | 0.694 | 15 | 34 |
| <i>GDNF</i>       | chr5 | 37835529 | C   | A | -- | -- | 5'UTR  | SNP | 0.236 | 42 | 13 |
| --                | chr5 | 37933139 | C   | A | -- | -- | IGR    | SNP | 0.267 | 33 | 12 |
| --                | chr5 | 37972965 | T   | C | -- | -- | IGR    | SNP | 0.267 | 33 | 12 |
| --                | chr5 | 38015937 | C   | T | -- | -- | IGR    | SNP | 0.167 | 45 | 9  |
| --                | chr5 | 38048487 | G   | C | -- | -- | IGR    | SNP | 0.118 | 30 | 4  |
| --                | chr5 | 38102104 | T   | C | -- | -- | IGR    | SNP | 0.224 | 45 | 13 |
| --                | chr5 | 38183745 | C   | T | -- | -- | IGR    | SNP | 0.274 | 45 | 17 |
| --                | chr5 | 38247365 | G   | T | -- | -- | IGR    | SNP | 0.205 | 31 | 8  |
| <i>EGFLAM</i>     | chr5 | 38311416 | T   | A | -- | -- | Intron | SNP | 0.276 | 42 | 16 |
| <i>EGFLAM</i>     | chr5 | 38404095 | C   | T | -- | -- | Intron | SNP | 0.274 | 45 | 17 |
| --                | chr5 | 38815899 | T   | C | -- | -- | IGR    | SNP | 0.182 | 18 | 4  |
| --                | chr5 | 38821524 | T   | C | -- | -- | IGR    | SNP | 0.300 | 7  | 3  |
| --                | chr5 | 38824572 | C   | G | -- | -- | IGR    | SNP | 0.333 | 6  | 3  |
| <i>FYB</i>        | chr5 | 39189604 | A   | C | -- | -- | Intron | SNP | 0.247 | 55 | 18 |
| <i>C9</i>         | chr5 | 39348401 | A   | G | -- | -- | Intron | SNP | 0.200 | 8  | 2  |
| --                | chr5 | 39489936 | A   | G | -- | -- | IGR    | SNP | 0.194 | 50 | 12 |
| --                | chr5 | 39768792 | C   | T | -- | -- | IGR    | SNP | 0.208 | 57 | 15 |
| --                | chr5 | 39821651 | G   | T | -- | -- | IGR    | SNP | 0.177 | 51 | 11 |
| --                | chr5 | 40012658 | A   | C | -- | -- | IGR    | SNP | 0.400 | 15 | 10 |
| --                | chr5 | 40066414 | C   | G | -- | -- | IGR    | SNP | 0.190 | 34 | 8  |
| <i>C7</i>         | chr5 | 40962641 | C   | T | -- | -- | Intron | SNP | 0.159 | 37 | 7  |
| <i>HEATR7B2</i>   | chr5 | 41022702 | C   | A | -- | -- | Intron | SNP | 0.145 | 53 | 9  |
| <i>HEATR7B2</i>   | chr5 | 41022703 | T   | C | -- | -- | Intron | SNP | 0.145 | 53 | 9  |
| <i>HEATR7B2</i>   | chr5 | 41057156 | C   | T | -- | -- | Intron | SNP | 0.227 | 34 | 10 |
| --                | chr5 | 41095314 | C   | T | -- | -- | IGR    | SNP | 0.250 | 60 | 20 |
| <i>C6</i>         | chr5 | 41251449 | CAT | - | -- | -- | Intron | DEL | 0.132 | 33 | 5  |
| --                | chr5 | 41293027 | T   | G | -- | -- | IGR    | SNP | 0.250 | 30 | 10 |
| --                | chr5 | 41301708 | C   | G | -- | -- | IGR    | SNP | 0.230 | 47 | 14 |
| <i>PLCXD3</i>     | chr5 | 41345987 | TA  | - | -- | -- | Intron | DEL | 0.182 | 18 | 4  |
| --                | chr5 | 41527798 | TA  | - | -- | -- | IGR    | DEL | 0.176 | 56 | 12 |
| --                | chr5 | 41651473 | AT  | - | -- | -- | IGR    | DEL | 0.386 | 35 | 22 |
| --                | chr5 | 41725008 | T   | G | -- | -- | IGR    | SNP | 0.256 | 32 | 11 |
| --                | chr5 | 41970850 | C   | A | -- | -- | IGR    | SNP | 0.130 | 40 | 6  |
| --                | chr5 | 41970851 | A   | G | -- | -- | IGR    | SNP | 0.130 | 40 | 6  |
| --                | chr5 | 42071528 | A   | C | -- | -- | IGR    | SNP | 0.382 | 34 | 21 |
| --                | chr5 | 42091414 | T   | G | -- | -- | IGR    | SNP | 0.311 | 31 | 14 |
| --                | chr5 | 42146843 | G   | T | -- | -- | IGR    | SNP | 0.169 | 49 | 10 |
| --                | chr5 | 42146942 | T   | A | -- | -- | IGR    | SNP | 0.264 | 39 | 14 |
| <i>CCDC152</i>    | chr5 | 42767335 | G   | T | -- | -- | Intron | SNP | 0.343 | 23 | 12 |
| <i>NIM1</i>       | chr5 | 43248064 | G   | T | -- | -- | Intron | SNP | 0.313 | 33 | 15 |
| <i>CCL28</i>      | chr5 | 43383206 | C   | A | -- | -- | Intron | SNP | 0.205 | 35 | 9  |
| <i>CCL28</i>      | chr5 | 43383207 | A   | C | -- | -- | Intron | SNP | 0.205 | 35 | 9  |
| --                | chr5 | 43797722 | T   | G | -- | -- | IGR    | SNP | 0.174 | 19 | 4  |
| --                | chr5 | 44057269 | C   | T | -- | -- | IGR    | SNP | 0.290 | 22 | 9  |
| --                | chr5 | 44404870 | C   | G | -- | -- | IGR    | SNP | 0.594 | 13 | 19 |
| --                | chr5 | 44413354 | C   | G | -- | -- | IGR    | SNP | 0.333 | 18 | 9  |
| --                | chr5 | 44413364 | C   | G | -- | -- | IGR    | SNP | 0.393 | 17 | 11 |
| --                | chr5 | 44557638 | C   | A | -- | -- | IGR    | SNP | 0.320 | 17 | 8  |
| --                | chr5 | 44825456 | G   | T | -- | -- | IGR    | SNP | 0.235 | 13 | 4  |
| --                | chr5 | 44854258 | A   | T | -- | -- | IGR    | SNP | 0.204 | 43 | 11 |
| --                | chr5 | 44955626 | C   | T | -- | -- | IGR    | SNP | 0.517 | 14 | 15 |
| --                | chr5 | 45130188 | C   | G | -- | -- | IGR    | SNP | 0.342 | 25 | 13 |
| --                | chr5 | 45165038 | G   | A | -- | -- | IGR    | SNP | 0.439 | 23 | 18 |

|                   |      |          |     |     |    |    |        |     |       |    |    |
|-------------------|------|----------|-----|-----|----|----|--------|-----|-------|----|----|
| <i>HCN1</i>       | chr5 | 45352299 | -   | TA  | -- | -- | Intron | INS | 0.143 | 12 | 2  |
| <i>HCN1</i>       | chr5 | 45525169 | A   | G   | -- | -- | Intron | SNP | 0.136 | 19 | 3  |
| <i>HCN1</i>       | chr5 | 45525173 | C   | T   | -- | -- | Intron | SNP | 0.125 | 21 | 3  |
| <i>HCN1</i>       | chr5 | 45537625 | C   | T   | -- | -- | Intron | SNP | 0.333 | 8  | 4  |
| <i>HCN1</i>       | chr5 | 45559312 | A   | T   | -- | -- | Intron | SNP | 0.324 | 25 | 12 |
| --                | chr5 | 45767246 | T   | C   | -- | -- | IGR    | SNP | 0.357 | 27 | 15 |
| --                | chr5 | 45798774 | C   | G   | -- | -- | IGR    | SNP | 0.333 | 22 | 11 |
| --                | chr5 | 45857975 | G   | C   | -- | -- | IGR    | SNP | 0.645 | 11 | 20 |
| --                | chr5 | 45927738 | T   | A   | -- | -- | IGR    | SNP | 0.194 | 29 | 7  |
| --                | chr5 | 46221215 | C   | T   | -- | -- | IGR    | SNP | 0.630 | 20 | 34 |
| --                | chr5 | 49407731 | G   | T   | -- | -- | IGR    | SNP | 0.113 | 47 | 6  |
| --                | chr5 | 49431286 | T   | G   | -- | -- | IGR    | SNP | 0.222 | 14 | 4  |
| --                | chr5 | 49431661 | TC  | -   | -- | -- | IGR    | DEL | 0.105 | 34 | 4  |
| --                | chr5 | 49458967 | C   | T   | -- | -- | IGR    | SNP | 0.192 | 21 | 5  |
| --                | chr5 | 49477388 | G   | C   | -- | -- | IGR    | SNP | 0.611 | 14 | 22 |
| --                | chr5 | 49538718 | A   | G   | -- | -- | IGR    | SNP | 0.300 | 21 | 9  |
| --                | chr5 | 49638888 | C   | A   | -- | -- | IGR    | SNP | 0.385 | 24 | 15 |
| --                | chr5 | 49677792 | G   | T   | -- | -- | IGR    | SNP | 0.167 | 30 | 6  |
| --                | chr5 | 49679635 | C   | G   | -- | -- | IGR    | SNP | 0.472 | 19 | 17 |
| <i>PARP8</i>      | chr5 | 50058262 | C   | T   | -- | -- | Intron | SNP | 0.667 | 10 | 20 |
| --                | chr5 | 50149390 | C   | T   | -- | -- | IGR    | SNP | 0.353 | 33 | 18 |
| --                | chr5 | 50153552 | G   | T   | -- | -- | IGR    | SNP | 0.146 | 41 | 7  |
| --                | chr5 | 50168423 | C   | T   | -- | -- | IGR    | SNP | 0.210 | 49 | 13 |
| --                | chr5 | 50177870 | G   | T   | -- | -- | IGR    | SNP | 0.579 | 24 | 33 |
| --                | chr5 | 50177871 | C   | T   | -- | -- | IGR    | SNP | 0.579 | 24 | 33 |
| --                | chr5 | 50218625 | C   | T   | -- | -- | IGR    | SNP | 0.518 | 41 | 44 |
| --                | chr5 | 50386834 | T   | A   | -- | -- | IGR    | SNP | 0.152 | 67 | 12 |
| --                | chr5 | 50447462 | A   | T   | -- | -- | IGR    | SNP | 0.255 | 38 | 13 |
| --                | chr5 | 50554592 | A   | G   | -- | -- | IGR    | SNP | 0.131 | 53 | 8  |
| --                | chr5 | 50562067 | C   | A   | -- | -- | IGR    | SNP | 0.145 | 53 | 9  |
| --                | chr5 | 50607841 | C   | A   | -- | -- | IGR    | SNP | 0.423 | 41 | 30 |
| --                | chr5 | 50675517 | A   | C   | -- | -- | IGR    | SNP | 0.211 | 60 | 16 |
| <i>ISL1</i>       | chr5 | 50683812 | T   | A   | -- | -- | Intron | SNP | 0.191 | 76 | 18 |
| --                | chr5 | 50717686 | C   | T   | -- | -- | IGR    | SNP | 0.532 | 29 | 33 |
| --                | chr5 | 50763939 | G   | A   | -- | -- | IGR    | SNP | 0.597 | 27 | 40 |
| --                | chr5 | 50850714 | G   | C   | -- | -- | IGR    | SNP | 0.128 | 41 | 6  |
| --                | chr5 | 50868520 | A   | T   | -- | -- | IGR    | SNP | 0.148 | 46 | 8  |
| --                | chr5 | 51060015 | CAG | -   | -- | -- | IGR    | DEL | 0.120 | 22 | 3  |
| --                | chr5 | 51105810 | G   | T   | -- | -- | IGR    | SNP | 0.200 | 36 | 9  |
| --                | chr5 | 51130277 | C   | G   | -- | -- | IGR    | SNP | 0.237 | 29 | 9  |
| --                | chr5 | 51130774 | A   | T   | -- | -- | IGR    | SNP | 0.133 | 26 | 4  |
| --                | chr5 | 51194129 | C   | G   | -- | -- | IGR    | SNP | 0.550 | 9  | 11 |
| --                | chr5 | 51695615 | G   | T   | -- | -- | IGR    | SNP | 0.179 | 55 | 12 |
| --                | chr5 | 51935925 | G   | A   | -- | -- | IGR    | SNP | 0.429 | 32 | 24 |
| --                | chr5 | 51966780 | A   | C   | -- | -- | IGR    | SNP | 0.471 | 36 | 32 |
| --                | chr5 | 52039851 | T   | A   | -- | -- | IGR    | SNP | 0.177 | 51 | 11 |
| --                | chr5 | 52047114 | A   | T   | -- | -- | IGR    | SNP | 0.200 | 40 | 10 |
| <i>ITGA1,PELO</i> | chr5 | 52090735 | T   | A   | -- | -- | Intron | SNP | 0.487 | 20 | 19 |
| <i>ITGA1</i>      | chr5 | 52208941 | G   | T   | -- | -- | Intron | SNP | 0.116 | 38 | 5  |
| --                | chr5 | 52467091 | C   | G   | -- | -- | IGR    | SNP | 0.509 | 28 | 29 |
| <i>NDUFS4</i>     | chr5 | 52882475 | C   | G   | -- | -- | Intron | SNP | 0.526 | 27 | 30 |
| --                | chr5 | 53092016 | C   | G   | -- | -- | IGR    | SNP | 0.458 | 32 | 27 |
| <i>ARL15</i>      | chr5 | 53378795 | T   | A   | -- | -- | Intron | SNP | 0.154 | 44 | 8  |
| <i>ARL15</i>      | chr5 | 53584779 | C   | A   | -- | -- | Intron | SNP | 0.245 | 40 | 13 |
| <i>ARL15</i>      | chr5 | 53584780 | T   | C   | -- | -- | Intron | SNP | 0.236 | 42 | 13 |
| --                | chr5 | 53618170 | G   | T   | -- | -- | IGR    | SNP | 0.362 | 30 | 17 |
| --                | chr5 | 53722593 | G   | A   | -- | -- | IGR    | SNP | 0.210 | 64 | 17 |
| --                | chr5 | 53728566 | A   | G   | -- | -- | IGR    | SNP | 0.433 | 38 | 29 |
| --                | chr5 | 53760250 | -   | AGT | -- | -- | IGR    | INS | 0.386 | 25 | 17 |
| --                | chr5 | 53845731 | A   | G   | -- | -- | IGR    | SNP | 0.483 | 31 | 29 |
| --                | chr5 | 54055022 | A   | T   | -- | -- | IGR    | SNP | 0.162 | 31 | 6  |
| --                | chr5 | 54270460 | C   | A   | -- | -- | IGR    | SNP | 0.220 | 46 | 13 |
| --                | chr5 | 54360328 | G   | T   | -- | -- | IGR    | SNP | 0.136 | 57 | 9  |
| --                | chr5 | 54882180 | G   | T   | -- | -- | IGR    | SNP | 0.148 | 23 | 4  |
| <i>SLC38A9</i>    | chr5 | 54947801 | AC  | -   | -- | -- | Intron | DEL | 0.127 | 48 | 7  |
| <i>SLC38A9</i>    | chr5 | 54955952 | C   | G   | -- | -- | Intron | SNP | 0.295 | 31 | 13 |
| --                | chr5 | 55126289 | C   | T   | -- | -- | IGR    | SNP | 0.150 | 51 | 9  |
| <i>IL6ST</i>      | chr5 | 55246363 | C   | A   | -- | -- | Intron | SNP | 0.333 | 8  | 4  |
| --                | chr5 | 55319340 | A   | T   | -- | -- | IGR    | SNP | 0.138 | 69 | 11 |
| <i>ANKRD55</i>    | chr5 | 55421122 | TC  | -   | -- | -- | Intron | DEL | 0.106 | 42 | 5  |
| <i>ANKRD55</i>    | chr5 | 55497047 | C   | G   | -- | -- | Intron | SNP | 0.156 | 65 | 12 |
| --                | chr5 | 55582640 | G   | A   | -- | -- | IGR    | SNP | 0.188 | 39 | 9  |
| --                | chr5 | 55668342 | C   | T   | -- | -- | IGR    | SNP | 0.250 | 12 | 4  |
| --                | chr5 | 55668479 | T   | C   | -- | -- | IGR    | SNP | 0.200 | 16 | 4  |
| --                | chr5 | 55668495 | CT  | -   | -- | -- | IGR    | DEL | 0.182 | 18 | 4  |
| --                | chr5 | 55682033 | C   | G   | -- | -- | IGR    | SNP | 0.591 | 27 | 39 |
| --                | chr5 | 55931868 | G   | T   | -- | -- | IGR    | SNP | 0.143 | 18 | 3  |
| --                | chr5 | 55956178 | G   | A   | -- | -- | IGR    | SNP | 0.178 | 37 | 8  |
| <i>MAP3K1</i>     | chr5 | 56167669 | G   | A   | -- | -- | Intron | SNP | 0.245 | 37 | 12 |
| <i>GPBP1</i>      | chr5 | 56531635 | A   | G   | -- | -- | Intron | SNP | 0.236 | 42 | 13 |

|          |      |          |            |    |       |      |         |     |       |    |    |
|----------|------|----------|------------|----|-------|------|---------|-----|-------|----|----|
| --       | chr5 | 56652853 | G          | A  | --    | --   | IGR     | SNP | 0.150 | 34 | 6  |
| --       | chr5 | 56714165 | G          | A  | --    | --   | IGR     | SNP | 0.204 | 43 | 11 |
| ACTBL2   | chr5 | 56778814 | C          | A  | --    | --   | 5'Flank | SNP | 0.245 | 40 | 13 |
| --       | chr5 | 57264023 | C          | G  | --    | --   | IGR     | SNP | 0.600 | 4  | 6  |
| --       | chr5 | 57356139 | C          | G  | --    | --   | IGR     | SNP | 0.157 | 43 | 8  |
| --       | chr5 | 57441398 | C          | T  | --    | --   | IGR     | SNP | 0.164 | 46 | 9  |
| --       | chr5 | 57529010 | G          | A  | --    | --   | IGR     | SNP | 0.129 | 27 | 4  |
| --       | chr5 | 57669510 | T          | G  | --    | --   | IGR     | SNP | 0.500 | 11 | 11 |
| --       | chr5 | 57669538 | G          | A  | --    | --   | IGR     | SNP | 0.125 | 28 | 4  |
| --       | chr5 | 57737791 | A          | T  | --    | --   | IGR     | SNP | 0.333 | 6  | 3  |
| --       | chr5 | 57766427 | C          | T  | --    | --   | IGR     | SNP | 0.455 | 6  | 5  |
| --       | chr5 | 57769653 | TC         | -  | --    | --   | IGR     | DEL | 0.385 | 16 | 10 |
| --       | chr5 | 57853521 | -          | CT | --    | --   | IGR     | INS | 0.167 | 15 | 3  |
| --       | chr5 | 57853928 | C          | T  | --    | --   | IGR     | SNP | 0.139 | 31 | 5  |
| PDE4D    | chr5 | 58586644 | T          | G  | --    | --   | Intron  | SNP | 0.538 | 12 | 14 |
| PDE4D    | chr5 | 59654954 | GCAGGGCAC- | -  | --    | --   | Intron  | DEL | 0.786 | 6  | 22 |
| PDE4D    | chr5 | 59725981 | C          | A  | --    | --   | Intron  | SNP | 0.115 | 46 | 6  |
| PART1    | chr5 | 59789913 | C          | G  | --    | --   | RNA     | SNP | 0.750 | 7  | 21 |
| --       | chr5 | 60534997 | C          | G  | --    | --   | IGR     | SNP | 0.462 | 7  | 6  |
| --       | chr5 | 61206375 | C          | A  | --    | --   | IGR     | SNP | 0.839 | 5  | 26 |
| --       | chr5 | 61457248 | TG         | -  | --    | --   | IGR     | DEL | 0.806 | 6  | 25 |
| --       | chr5 | 61531960 | C          | T  | --    | --   | IGR     | SNP | 0.154 | 22 | 4  |
| --       | chr5 | 61543594 | A          | T  | --    | --   | IGR     | SNP | 0.160 | 21 | 4  |
| --       | chr5 | 61543633 | TTAAAA     | -  | --    | --   | IGR     | DEL | 0.115 | 23 | 3  |
| --       | chr5 | 61545770 | C          | A  | --    | --   | IGR     | SNP | 0.138 | 25 | 4  |
| --       | chr5 | 62131864 | G          | T  | --    | --   | IGR     | SNP | 0.929 | 2  | 26 |
| --       | chr5 | 62154450 | A          | G  | --    | --   | IGR     | SNP | 0.840 | 4  | 21 |
| --       | chr5 | 62563379 | G          | C  | --    | --   | IGR     | SNP | 0.143 | 18 | 3  |
| --       | chr5 | 62661427 | G          | A  | --    | --   | IGR     | SNP | 0.185 | 22 | 5  |
| --       | chr5 | 62759880 | C          | T  | --    | --   | IGR     | SNP | 0.968 | 1  | 30 |
| --       | chr5 | 63203057 | GC         | -  | --    | --   | IGR     | DEL | 0.833 | 4  | 20 |
| --       | chr5 | 63251751 | G          | C  | --    | --   | IGR     | SNP | 0.880 | 3  | 22 |
| HTR1A    | chr5 | 63257283 | C          | T  | G264A | L88L | Silent  | SNP | 0.849 | 8  | 45 |
| --       | chr5 | 64346629 | G          | A  | --    | --   | IGR     | SNP | 0.909 | 3  | 30 |
| --       | chr5 | 64346630 | C          | A  | --    | --   | IGR     | SNP | 0.912 | 3  | 31 |
| ADAMTS6  | chr5 | 64631115 | TC         | -  | --    | --   | Intron  | DEL | 0.464 | 15 | 13 |
| ADAMTS6  | chr5 | 64739449 | C          | A  | --    | --   | Intron  | SNP | 0.182 | 18 | 4  |
| ADAMTS6  | chr5 | 64739477 | G          | A  | --    | --   | Intron  | SNP | 0.176 | 14 | 3  |
| --       | chr5 | 65186055 | G          | C  | --    | --   | IGR     | SNP | 0.364 | 28 | 16 |
| --       | chr5 | 65800809 | -          | GT | --    | --   | IGR     | INS | 0.464 | 15 | 13 |
| MAST4    | chr5 | 66049155 | A          | C  | --    | --   | Intron  | SNP | 0.375 | 5  | 3  |
| MAST4    | chr5 | 66049156 | C          | A  | --    | --   | Intron  | SNP | 0.300 | 7  | 3  |
| --       | chr5 | 66777109 | C          | T  | --    | --   | IGR     | SNP | 0.800 | 8  | 32 |
| --       | chr5 | 66923634 | -          | TG | --    | --   | IGR     | INS | 0.118 | 15 | 2  |
| --       | chr5 | 67498481 | G          | C  | --    | --   | IGR     | SNP | 0.815 | 5  | 22 |
| PIK3R1   | chr5 | 67558757 | A          | G  | --    | --   | Intron  | SNP | 0.182 | 18 | 4  |
| --       | chr5 | 67662164 | C          | G  | --    | --   | IGR     | SNP | 0.824 | 6  | 28 |
| --       | chr5 | 67782415 | C          | G  | --    | --   | IGR     | SNP | 0.868 | 5  | 33 |
| --       | chr5 | 67793680 | G          | A  | --    | --   | IGR     | SNP | 0.786 | 6  | 22 |
| SLC30A5  | chr5 | 68426305 | G          | T  | --    | --   | 3'UTR   | SNP | 0.429 | 8  | 6  |
| CDK7     | chr5 | 68554225 | G          | T  | --    | --   | Intron  | SNP | 0.267 | 11 | 4  |
| MARVELD2 | chr5 | 68731606 | T          | A  | --    | --   | Intron  | SNP | 0.222 | 14 | 4  |
| --       | chr5 | 69932049 | G          | A  | --    | --   | IGR     | SNP | 0.625 | 6  | 10 |
| --       | chr5 | 70398895 | C          | G  | --    | --   | IGR     | SNP | 0.923 | 1  | 12 |
| --       | chr5 | 70485238 | CTGTTT     | -  | --    | --   | IGR     | DEL | 0.421 | 22 | 16 |
| --       | chr5 | 70485255 | T          | C  | --    | --   | IGR     | SNP | 0.410 | 23 | 16 |
| --       | chr5 | 70575965 | T          | C  | --    | --   | IGR     | SNP | 0.222 | 14 | 4  |
| --       | chr5 | 70740877 | G          | T  | --    | --   | IGR     | SNP | 0.167 | 20 | 4  |
| BDP1     | chr5 | 70760542 | G          | T  | --    | --   | Intron  | SNP | 0.400 | 6  | 4  |
| --       | chr5 | 71008531 | C          | A  | --    | --   | IGR     | SNP | 0.467 | 8  | 7  |
| CARTPT   | chr5 | 71015930 | C          | A  | --    | --   | Intron  | SNP | 0.139 | 31 | 5  |
| --       | chr5 | 71143143 | GA         | -  | --    | --   | IGR     | DEL | 0.125 | 21 | 3  |
| --       | chr5 | 71311810 | A          | T  | --    | --   | IGR     | SNP | 0.333 | 8  | 4  |
| ZNF366   | chr5 | 71758374 | C          | T  | --    | --   | Intron  | SNP | 0.455 | 6  | 5  |
| --       | chr5 | 71848795 | G          | T  | --    | --   | IGR     | SNP | 0.300 | 7  | 3  |
| --       | chr5 | 71864258 | T          | A  | --    | --   | IGR     | SNP | 0.969 | 1  | 31 |
| TNPO1    | chr5 | 72166005 | G          | T  | --    | --   | Intron  | SNP | 0.267 | 11 | 4  |
| --       | chr5 | 72215774 | TTA        | -  | --    | --   | IGR     | DEL | 0.154 | 22 | 4  |
| --       | chr5 | 72452234 | G          | A  | --    | --   | IGR     | SNP | 0.512 | 21 | 22 |
| RGNEF    | chr5 | 73058378 | C          | T  | --    | --   | Intron  | SNP | 0.857 | 4  | 24 |
| --       | chr5 | 73515381 | -          | CA | --    | --   | IGR     | INS | 0.286 | 10 | 4  |
| COL4A3BP | chr5 | 74767596 | A          | G  | --    | --   | Intron  | SNP | 0.714 | 8  | 20 |
| --       | chr5 | 75035322 | A          | C  | --    | --   | IGR     | SNP | 0.208 | 19 | 5  |
| --       | chr5 | 75331534 | G          | A  | --    | --   | IGR     | SNP | 0.222 | 14 | 4  |
| IQGAP2   | chr5 | 75823558 | G          | A  | --    | --   | Intron  | SNP | 0.219 | 25 | 7  |
| IQGAP2   | chr5 | 75869623 | A          | T  | --    | --   | Intron  | SNP | 0.313 | 11 | 5  |
| IQGAP2   | chr5 | 75919264 | C          | G  | --    | --   | Intron  | SNP | 0.846 | 6  | 33 |
| PDE8B    | chr5 | 76616992 | G          | T  | --    | --   | Intron  | SNP | 0.333 | 8  | 4  |
| PDE8B    | chr5 | 76659413 | T          | G  | --    | --   | Intron  | SNP | 0.353 | 22 | 12 |
| --       | chr5 | 77130484 | C          | A  | --    | --   | IGR     | SNP | 0.353 | 11 | 6  |

|             |      |          |   |       |    |    |        |     |       |    |    |
|-------------|------|----------|---|-------|----|----|--------|-----|-------|----|----|
| --          | chr5 | 77986418 | G | T     | -- | -- | IGR    | SNP | 0.760 | 6  | 19 |
| ARSB        | chr5 | 78277758 | G | T     | -- | -- | Intron | SNP | 0.333 | 6  | 3  |
| PAPD4       | chr5 | 78917596 | C | A     | -- | -- | Intron | SNP | 0.190 | 17 | 4  |
| --          | chr5 | 79239622 | G | T     | -- | -- | IGR    | SNP | 0.111 | 32 | 4  |
| FAM151B     | chr5 | 79801568 | A | T     | -- | -- | Intron | SNP | 0.231 | 10 | 3  |
| --          | chr5 | 79917297 | A | T     | -- | -- | IGR    | SNP | 0.727 | 6  | 16 |
| MSH3        | chr5 | 79993110 | T | G     | -- | -- | Intron | SNP | 0.240 | 19 | 6  |
| LOC10013106 | chr5 | 80573442 | A | T     | -- | -- | RNA    | SNP | 0.500 | 2  | 2  |
| SSBP2       | chr5 | 80784457 | G | T     | -- | -- | Intron | SNP | 1.000 | 0  | 11 |
| SSBP2       | chr5 | 80893162 | - | TAA   | -- | -- | Intron | INS | 0.105 | 17 | 2  |
| SSBP2       | chr5 | 80970742 | T | C     | -- | -- | Intron | SNP | 0.409 | 13 | 9  |
| --          | chr5 | 81167870 | G | T     | -- | -- | IGR    | SNP | 0.926 | 2  | 25 |
| --          | chr5 | 81174986 | G | T     | -- | -- | IGR    | SNP | 0.537 | 19 | 22 |
| ATG10       | chr5 | 81493535 | T | A     | -- | -- | Intron | SNP | 0.231 | 20 | 6  |
| --          | chr5 | 81579376 | T | G     | -- | -- | IGR    | SNP | 0.250 | 15 | 5  |
| --          | chr5 | 81845478 | C | T     | -- | -- | IGR    | SNP | 0.795 | 8  | 31 |
| --          | chr5 | 81919390 | G | T     | -- | -- | IGR    | SNP | 0.250 | 18 | 6  |
| --          | chr5 | 82168153 | - | CT    | -- | -- | IGR    | INS | 0.136 | 19 | 3  |
| --          | chr5 | 82758453 | C | T     | -- | -- | IGR    | SNP | 0.250 | 9  | 3  |
| --          | chr5 | 83051483 | G | A     | -- | -- | IGR    | SNP | 0.391 | 14 | 9  |
| --          | chr5 | 83153603 | T | G     | -- | -- | IGR    | SNP | 0.581 | 13 | 18 |
| --          | chr5 | 83216350 | G | T     | -- | -- | IGR    | SNP | 0.759 | 7  | 22 |
| EDIL3       | chr5 | 83367820 | T | G     | -- | -- | Intron | SNP | 0.938 | 1  | 15 |
| EDIL3       | chr5 | 83655675 | C | T     | -- | -- | Intron | SNP | 0.800 | 5  | 20 |
| --          | chr5 | 83961853 | G | T     | -- | -- | IGR    | SNP | 0.304 | 16 | 7  |
| --          | chr5 | 83973463 | C | T     | -- | -- | IGR    | SNP | 0.889 | 1  | 8  |
| --          | chr5 | 84101108 | A | G     | -- | -- | IGR    | SNP | 0.800 | 6  | 24 |
| --          | chr5 | 84420093 | T | C     | -- | -- | IGR    | SNP | 0.429 | 12 | 9  |
| --          | chr5 | 84495887 | C | G     | -- | -- | IGR    | SNP | 0.947 | 1  | 18 |
| --          | chr5 | 84775027 | C | A     | -- | -- | IGR    | SNP | 0.900 | 1  | 9  |
| --          | chr5 | 85200502 | C | A     | -- | -- | IGR    | SNP | 0.750 | 6  | 18 |
| --          | chr5 | 85368555 | C | T     | -- | -- | IGR    | SNP | 0.500 | 14 | 14 |
| --          | chr5 | 85369847 | - | TTA   | -- | -- | IGR    | DEL | 0.111 | 16 | 2  |
| --          | chr5 | 85530058 | - | GTGTT | -- | -- | IGR    | DEL | 0.143 | 12 | 2  |
| NBPF22P     | chr5 | 85582261 | G | A     | -- | -- | RNA    | SNP | 0.762 | 5  | 16 |
| --          | chr5 | 85887399 | T | A     | -- | -- | IGR    | SNP | 0.345 | 19 | 10 |
| --          | chr5 | 86122798 | C | A     | -- | -- | IGR    | SNP | 0.333 | 20 | 10 |
| --          | chr5 | 86157635 | G | A     | -- | -- | IGR    | SNP | 0.828 | 5  | 24 |
| --          | chr5 | 86165917 | C | A     | -- | -- | IGR    | SNP | 0.968 | 1  | 30 |
| RASA1       | chr5 | 86584740 | C | G     | -- | -- | Intron | SNP | 0.917 | 2  | 22 |
| --          | chr5 | 86897273 | C | A     | -- | -- | IGR    | SNP | 0.875 | 4  | 28 |
| --          | chr5 | 86997043 | C | G     | -- | -- | IGR    | SNP | 0.860 | 7  | 43 |
| --          | chr5 | 87040653 | A | C     | -- | -- | IGR    | SNP | 0.632 | 7  | 12 |
| --          | chr5 | 87302162 | A | G     | -- | -- | IGR    | SNP | 0.600 | 2  | 3  |
| --          | chr5 | 87483860 | C | G     | -- | -- | IGR    | SNP | 0.857 | 3  | 18 |
| LOC10050585 | chr5 | 87710235 | C | A     | -- | -- | RNA    | SNP | 0.667 | 7  | 14 |
| --          | chr5 | 87833991 | A | C     | -- | -- | IGR    | SNP | 0.238 | 16 | 5  |
| LINC00461   | chr5 | 87903054 | C | G     | -- | -- | RNA    | SNP | 0.846 | 4  | 22 |
| --          | chr5 | 88008061 | C | A     | -- | -- | IGR    | SNP | 0.905 | 2  | 19 |
| MEF2C       | chr5 | 88040803 | T | C     | -- | -- | Intron | SNP | 0.897 | 3  | 26 |
| MEF2C       | chr5 | 88137446 | C | A     | -- | -- | Intron | SNP | 0.280 | 18 | 7  |
| MEF2C       | chr5 | 88192476 | A | G     | -- | -- | Intron | SNP | 0.190 | 17 | 4  |
| --          | chr5 | 88210942 | A | T     | -- | -- | IGR    | SNP | 0.214 | 22 | 6  |
| --          | chr5 | 88641491 | T | G     | -- | -- | IGR    | SNP | 0.818 | 4  | 18 |
| --          | chr5 | 88991051 | G | T     | -- | -- | IGR    | SNP | 0.484 | 16 | 15 |
| --          | chr5 | 89347935 | G | T     | -- | -- | IGR    | SNP | 0.526 | 9  | 10 |
| --          | chr5 | 89507087 | C | A     | -- | -- | IGR    | SNP | 1.000 | 0  | 3  |
| GPR98       | chr5 | 89983888 | A | G     | -- | -- | Intron | SNP | 0.333 | 10 | 5  |
| --          | chr5 | 90470874 | A | C     | -- | -- | IGR    | SNP | 0.174 | 19 | 4  |
| --          | chr5 | 90807065 | A | T     | -- | -- | IGR    | SNP | 0.611 | 7  | 11 |
| --          | chr5 | 90931145 | A | G     | -- | -- | IGR    | SNP | 0.545 | 10 | 12 |
| --          | chr5 | 91121016 | A | T     | -- | -- | IGR    | SNP | 0.643 | 5  | 9  |
| --          | chr5 | 91459136 | T | C     | -- | -- | IGR    | SNP | 0.737 | 5  | 14 |
| --          | chr5 | 91462652 | T | C     | -- | -- | IGR    | SNP | 0.273 | 8  | 3  |
| --          | chr5 | 91462653 | G | A     | -- | -- | IGR    | SNP | 0.273 | 8  | 3  |
| --          | chr5 | 91487937 | T | C     | -- | -- | IGR    | SNP | 0.800 | 1  | 4  |
| --          | chr5 | 91569205 | C | G     | -- | -- | IGR    | SNP | 0.750 | 2  | 6  |
| --          | chr5 | 91569333 | G | A     | -- | -- | IGR    | SNP | 0.188 | 13 | 3  |
| --          | chr5 | 91744020 | C | G     | -- | -- | IGR    | SNP | 0.875 | 2  | 14 |
| --          | chr5 | 91797199 | T | A     | -- | -- | IGR    | SNP | 0.889 | 2  | 16 |
| --          | chr5 | 91845142 | G | T     | -- | -- | IGR    | SNP | 0.667 | 5  | 10 |
| --          | chr5 | 91865480 | C | G     | -- | -- | IGR    | SNP | 0.750 | 3  | 9  |
| --          | chr5 | 92124622 | A | T     | -- | -- | IGR    | SNP | 0.500 | 10 | 10 |
| --          | chr5 | 92209582 | G | T     | -- | -- | IGR    | SNP | 0.444 | 5  | 4  |
| FLJ42709    | chr5 | 92792866 | - | CG    | -- | -- | RNA    | INS | 0.120 | 22 | 3  |
| FLJ42709    | chr5 | 92793039 | T | C     | -- | -- | RNA    | SNP | 0.211 | 15 | 4  |
| FLJ42709    | chr5 | 92793044 | C | T     | -- | -- | RNA    | SNP | 0.190 | 17 | 4  |
| KIAA0825    | chr5 | 93603934 | C | T     | -- | -- | Intron | SNP | 0.667 | 6  | 12 |
| ANKRD32     | chr5 | 93976426 | A | T     | -- | -- | Intron | SNP | 0.692 | 4  | 9  |
| MCTP1       | chr5 | 94133450 | A | G     | -- | -- | Intron | SNP | 0.778 | 2  | 7  |

|                    |      |           |     |     |    |    |         |     |       |    |    |
|--------------------|------|-----------|-----|-----|----|----|---------|-----|-------|----|----|
| <i>MCTP1</i>       | chr5 | 94194891  | G   | A   | -- | -- | Intron  | SNP | 0.786 | 3  | 11 |
| --                 | chr5 | 95043870  | T   | A   | -- | -- | IGR     | SNP | 0.267 | 11 | 4  |
| --                 | chr5 | 95043879  | -   | CT  | -- | -- | IGR     | INS | 0.333 | 10 | 5  |
| --                 | chr5 | 95043888  | T   | G   | -- | -- | IGR     | SNP | 0.333 | 10 | 5  |
| <i>ERAP1</i>       | chr5 | 96111388  | -   | TA  | -- | -- | 3'UTR   | INS | 0.750 | 5  | 15 |
| <i>LNPEP</i>       | chr5 | 96340474  | C   | G   | -- | -- | Intron  | SNP | 0.889 | 2  | 16 |
| --                 | chr5 | 97018829  | T   | C   | -- | -- | IGR     | SNP | 0.600 | 2  | 3  |
| --                 | chr5 | 97106861  | T   | G   | -- | -- | IGR     | SNP | 0.467 | 8  | 7  |
| --                 | chr5 | 97148014  | T   | G   | -- | -- | IGR     | SNP | 0.500 | 4  | 4  |
| --                 | chr5 | 97178859  | C   | T   | -- | -- | IGR     | SNP | 0.667 | 8  | 16 |
| --                 | chr5 | 97277973  | C   | A   | -- | -- | IGR     | SNP | 0.600 | 2  | 3  |
| --                 | chr5 | 97752609  | G   | T   | -- | -- | IGR     | SNP | 0.833 | 3  | 15 |
| --                 | chr5 | 98378444  | -   | AG  | -- | -- | IGR     | INS | 0.133 | 13 | 2  |
| --                 | chr5 | 98408343  | C   | A   | -- | -- | IGR     | SNP | 0.421 | 11 | 8  |
| --                 | chr5 | 98547662  | G   | A   | -- | -- | IGR     | SNP | 0.647 | 6  | 11 |
| --                 | chr5 | 98664940  | T   | C   | -- | -- | IGR     | SNP | 0.182 | 18 | 4  |
| --                 | chr5 | 98665005  | C   | A   | -- | -- | IGR     | SNP | 0.182 | 18 | 4  |
| --                 | chr5 | 98864936  | T   | A   | -- | -- | IGR     | SNP | 0.467 | 8  | 7  |
| --                 | chr5 | 98983111  | C   | T   | -- | -- | IGR     | SNP | 0.538 | 12 | 14 |
| --                 | chr5 | 99044701  | T   | G   | -- | -- | IGR     | SNP | 0.625 | 3  | 5  |
| --                 | chr5 | 99125678  | G   | T   | -- | -- | IGR     | SNP | 0.426 | 27 | 20 |
| --                 | chr5 | 99266125  | -   | TC  | -- | -- | IGR     | INS | 0.125 | 14 | 2  |
| --                 | chr5 | 99406902  | G   | T   | -- | -- | IGR     | SNP | 0.500 | 6  | 6  |
| --                 | chr5 | 99653242  | C   | T   | -- | -- | IGR     | SNP | 0.750 | 1  | 3  |
| --                 | chr5 | 99706597  | T   | C   | -- | -- | IGR     | SNP | 0.750 | 1  | 3  |
| <i>LOC10013305</i> | chr5 | 99724099  | G   | C   | -- | -- | 5'Flank | SNP | 0.222 | 14 | 4  |
| <i>LOC10013305</i> | chr5 | 99724101  | G   | A   | -- | -- | 5'Flank | SNP | 0.222 | 14 | 4  |
| <i>LOC10013305</i> | chr5 | 99724124  | G   | A   | -- | -- | 5'Flank | SNP | 0.208 | 19 | 5  |
| --                 | chr5 | 99731380  | A   | T   | -- | -- | IGR     | SNP | 0.667 | 3  | 6  |
| --                 | chr5 | 99868255  | C   | A   | -- | -- | IGR     | SNP | 0.222 | 14 | 4  |
| --                 | chr5 | 100115887 | C   | T   | -- | -- | IGR     | SNP | 0.692 | 4  | 9  |
| --                 | chr5 | 100813184 | T   | G   | -- | -- | IGR     | SNP | 0.769 | 3  | 10 |
| --                 | chr5 | 101645703 | GCA | -   | -- | -- | IGR     | DEL | 0.111 | 16 | 2  |
| <i>SLCO6A1</i>     | chr5 | 101792598 | C   | T   | -- | -- | Intron  | SNP | 0.500 | 2  | 2  |
| <i>SLCO6A1</i>     | chr5 | 101792838 | G   | A   | -- | -- | Intron  | SNP | 0.500 | 2  | 2  |
| <i>SLCO6A1</i>     | chr5 | 101810972 | G   | T   | -- | -- | Intron  | SNP | 0.846 | 2  | 11 |
| --                 | chr5 | 102100190 | A   | G   | -- | -- | IGR     | SNP | 0.700 | 3  | 7  |
| <i>PAM</i>         | chr5 | 102356548 | G   | A   | -- | -- | Intron  | SNP | 0.556 | 4  | 5  |
| --                 | chr5 | 102649808 | G   | A   | -- | -- | IGR     | SNP | 0.714 | 2  | 5  |
| --                 | chr5 | 102703282 | C   | T   | -- | -- | IGR     | SNP | 0.708 | 7  | 17 |
| --                 | chr5 | 103316077 | -   | TTC | -- | -- | IGR     | INS | 0.111 | 16 | 2  |
| --                 | chr5 | 103348651 | C   | G   | -- | -- | IGR     | SNP | 0.833 | 2  | 10 |
| --                 | chr5 | 103414018 | G   | A   | -- | -- | IGR     | SNP | 0.400 | 6  | 4  |
| --                 | chr5 | 103414021 | A   | C   | -- | -- | IGR     | SNP | 0.364 | 7  | 4  |
| --                 | chr5 | 103514000 | C   | G   | -- | -- | IGR     | SNP | 0.688 | 5  | 11 |
| --                 | chr5 | 103787270 | C   | T   | -- | -- | IGR     | SNP | 0.364 | 7  | 4  |
| --                 | chr5 | 103837930 | -   | CT  | -- | -- | IGR     | INS | 0.125 | 14 | 2  |
| --                 | chr5 | 103906807 | G   | A   | -- | -- | IGR     | SNP | 0.750 | 4  | 12 |
| --                 | chr5 | 104590334 | GT  | -   | -- | -- | IGR     | DEL | 0.105 | 17 | 2  |
| --                 | chr5 | 104743667 | T   | A   | -- | -- | IGR     | SNP | 0.400 | 6  | 4  |
| --                 | chr5 | 104938388 | G   | T   | -- | -- | IGR     | SNP | 0.917 | 1  | 11 |
| --                 | chr5 | 105426246 | G   | C   | -- | -- | IGR     | SNP | 0.867 | 6  | 39 |
| --                 | chr5 | 105559243 | T   | G   | -- | -- | IGR     | SNP | 0.256 | 32 | 11 |
| --                 | chr5 | 105575087 | A   | T   | -- | -- | IGR     | SNP | 0.111 | 24 | 3  |
| --                 | chr5 | 105654318 | G   | C   | -- | -- | IGR     | SNP | 0.173 | 43 | 9  |
| --                 | chr5 | 106318871 | T   | C   | -- | -- | IGR     | SNP | 0.111 | 24 | 3  |
| --                 | chr5 | 106474702 | C   | T   | -- | -- | IGR     | SNP | 0.286 | 15 | 6  |
| --                 | chr5 | 106476107 | T   | A   | -- | -- | IGR     | SNP | 0.381 | 26 | 16 |
| --                 | chr5 | 106476838 | G   | T   | -- | -- | IGR     | SNP | 0.367 | 19 | 11 |
| <i>EFNA5</i>       | chr5 | 106750878 | -   | TTA | -- | -- | Intron  | INS | 0.294 | 23 | 10 |
| <i>EFNA5</i>       | chr5 | 106906429 | A   | T   | -- | -- | Intron  | SNP | 0.326 | 29 | 14 |
| <i>EFNA5</i>       | chr5 | 106942833 | C   | T   | -- | -- | Intron  | SNP | 0.914 | 3  | 32 |
| <i>FBXL17</i>      | chr5 | 107206781 | C   | A   | -- | -- | Intron  | SNP | 0.300 | 7  | 3  |
| --                 | chr5 | 107863034 | T   | C   | -- | -- | IGR     | SNP | 0.643 | 5  | 9  |
| --                 | chr5 | 107889249 | A   | T   | -- | -- | IGR     | SNP | 0.200 | 16 | 4  |
| --                 | chr5 | 107911869 | G   | T   | -- | -- | IGR     | SNP | 0.125 | 21 | 3  |
| --                 | chr5 | 107962286 | A   | T   | -- | -- | IGR     | SNP | 0.625 | 6  | 10 |
| <i>FER</i>         | chr5 | 108084050 | C   | T   | -- | -- | Intron  | SNP | 0.850 | 3  | 17 |
| <i>FER</i>         | chr5 | 108267663 | -   | TTG | -- | -- | Intron  | INS | 0.619 | 8  | 13 |
| --                 | chr5 | 108795450 | T   | G   | -- | -- | IGR     | SNP | 0.500 | 4  | 4  |
| --                 | chr5 | 108795642 | C   | T   | -- | -- | IGR     | SNP | 0.333 | 6  | 3  |
| --                 | chr5 | 108795645 | C   | T   | -- | -- | IGR     | SNP | 0.333 | 6  | 3  |
| <i>MAN2A1</i>      | chr5 | 109185403 | G   | T   | -- | -- | Intron  | SNP | 0.471 | 9  | 8  |
| --                 | chr5 | 109309968 | T   | G   | -- | -- | IGR     | SNP | 0.714 | 6  | 15 |
| <i>TMEM232</i>     | chr5 | 109939389 | C   | A   | -- | -- | Intron  | SNP | 0.857 | 2  | 12 |
| --                 | chr5 | 110317619 | C   | A   | -- | -- | IGR     | SNP | 0.600 | 4  | 6  |
| --                 | chr5 | 110542770 | C   | A   | -- | -- | IGR     | SNP | 0.647 | 6  | 11 |
| --                 | chr5 | 110550133 | G   | C   | -- | -- | IGR     | SNP | 0.333 | 26 | 13 |
| --                 | chr5 | 110550155 | G   | A   | -- | -- | IGR     | SNP | 0.400 | 21 | 14 |
| <i>CAMK4</i>       | chr5 | 110653617 | A   | G   | -- | -- | Intron  | SNP | 0.235 | 13 | 4  |



|             |      |           |       |       |        |        |                 |     |       |    |    |
|-------------|------|-----------|-------|-------|--------|--------|-----------------|-----|-------|----|----|
| LOC10050567 | chr5 | 110863162 | C     | T     | --     | --     | RNA             | SNP | 0.306 | 25 | 11 |
| C5orf13     | chr5 | 111108927 | T     | C     | --     | --     | Intron          | SNP | 0.923 | 2  | 24 |
| --          | chr5 | 111453229 | G     | T     | --     | --     | IGR             | SNP | 0.286 | 10 | 4  |
| --          | chr5 | 111485117 | T     | C     | --     | --     | IGR             | SNP | 0.323 | 21 | 10 |
| --          | chr5 | 112006718 | G     | T     | --     | --     | IGR             | SNP | 0.267 | 11 | 4  |
| --          | chr5 | 112301459 | C     | G     | --     | --     | IGR             | SNP | 0.895 | 2  | 17 |
| --          | chr5 | 112301512 | C     | G     | --     | --     | IGR             | SNP | 0.900 | 3  | 27 |
| DGP2        | chr5 | 112329856 | C     | T     | --     | --     | Intron          | SNP | 0.364 | 7  | 4  |
| DGP2        | chr5 | 112329860 | C     | T     | --     | --     | Intron          | SNP | 0.364 | 7  | 4  |
| --          | chr5 | 113351689 | T     | C     | --     | --     | IGR             | SNP | 0.333 | 10 | 5  |
| --          | chr5 | 113494911 | G     | T     | --     | --     | IGR             | SNP | 0.313 | 11 | 5  |
| --          | chr5 | 113494969 | T     | G     | --     | --     | IGR             | SNP | 0.300 | 14 | 6  |
| --          | chr5 | 113616141 | T     | A     | --     | --     | IGR             | SNP | 0.125 | 21 | 3  |
| --          | chr5 | 114186563 | G     | C     | --     | --     | IGR             | SNP | 0.364 | 28 | 16 |
| PGGT1B      | chr5 | 114592023 | T     | C     | --     | --     | Intron          | SNP | 0.457 | 19 | 16 |
| --          | chr5 | 114722865 | C     | A     | --     | --     | IGR             | SNP | 0.108 | 33 | 4  |
| --          | chr5 | 114753154 | G     | A     | --     | --     | IGR             | SNP | 0.444 | 15 | 12 |
| --          | chr5 | 114883204 | G     | T     | --     | --     | IGR             | SNP | 0.190 | 17 | 4  |
| COMMD10     | chr5 | 115433313 | A     | G     | --     | --     | Intron          | SNP | 0.926 | 2  | 25 |
| COMMD10     | chr5 | 115484782 | GACAT | -     | --     | --     | Intron          | DEL | 0.188 | 13 | 3  |
| --          | chr5 | 116208769 | A     | G     | --     | --     | IGR             | SNP | 0.185 | 22 | 5  |
| --          | chr5 | 116208770 | G     | T     | --     | --     | IGR             | SNP | 0.185 | 22 | 5  |
| --          | chr5 | 116382990 | G     | C     | --     | --     | IGR             | SNP | 0.158 | 16 | 3  |
| --          | chr5 | 116433335 | C     | A     | --     | --     | IGR             | SNP | 0.913 | 2  | 21 |
| --          | chr5 | 116931929 | A     | T     | --     | --     | IGR             | SNP | 0.844 | 5  | 27 |
| --          | chr5 | 116975450 | T     | C     | --     | --     | IGR             | SNP | 0.370 | 17 | 10 |
| --          | chr5 | 117237008 | T     | A     | --     | --     | IGR             | SNP | 0.250 | 15 | 5  |
| --          | chr5 | 117250601 | TG    | -     | --     | --     | IGR             | DEL | 0.118 | 15 | 2  |
| DMXL1       | chr5 | 118457132 | T     | A     | --     | --     | Intron          | SNP | 0.167 | 15 | 3  |
| TNFAIP8     | chr5 | 118652787 | A     | T     | --     | --     | Intron          | SNP | 0.367 | 19 | 11 |
| --          | chr5 | 118777186 | -     | AATAT | --     | --     | IGR             | INS | 0.133 | 13 | 2  |
| HSD17B4     | chr5 | 118867589 | G     | C     | --     | --     | Intron          | SNP | 0.261 | 17 | 6  |
| --          | chr5 | 119034430 | G     | A     | --     | --     | IGR             | SNP | 0.950 | 1  | 19 |
| --          | chr5 | 119463414 | -     | TTTG  | --     | --     | IGR             | INS | 0.200 | 12 | 3  |
| --          | chr5 | 119487328 | A     | T     | --     | --     | IGR             | SNP | 0.368 | 12 | 7  |
| --          | chr5 | 119719821 | T     | G     | --     | --     | IGR             | SNP | 0.917 | 2  | 22 |
| --          | chr5 | 120033954 | -     | CA    | --     | --     | IGR             | INS | 0.105 | 17 | 2  |
| --          | chr5 | 121194303 | A     | G     | --     | --     | IGR             | SNP | 0.148 | 23 | 4  |
| --          | chr5 | 121393187 | GTGTA | -     | --     | --     | IGR             | DEL | 0.111 | 16 | 2  |
| SNX24       | chr5 | 122226184 | A     | T     | --     | --     | Intron          | SNP | 0.357 | 9  | 5  |
| PRDM6       | chr5 | 122478016 | G     | A     | --     | --     | Intron          | SNP | 0.379 | 18 | 11 |
| CEP120      | chr5 | 122737641 | C     | G     | --     | --     | Intron          | SNP | 0.133 | 26 | 4  |
| CEP120      | chr5 | 122737642 | G     | A     | --     | --     | Intron          | SNP | 0.133 | 26 | 4  |
| --          | chr5 | 123073828 | C     | T     | --     | --     | IGR             | SNP | 0.912 | 3  | 31 |
| --          | chr5 | 123880527 | C     | A     | --     | --     | IGR             | SNP | 0.535 | 20 | 23 |
| --          | chr5 | 124717644 | C     | A     | --     | --     | IGR             | SNP | 0.267 | 11 | 4  |
| --          | chr5 | 124970212 | T     | A     | --     | --     | IGR             | SNP | 0.179 | 32 | 7  |
| --          | chr5 | 124989113 | A     | T     | --     | --     | IGR             | SNP | 0.417 | 14 | 10 |
| --          | chr5 | 125497164 | C     | A     | --     | --     | IGR             | SNP | 0.296 | 19 | 8  |
| --          | chr5 | 125863362 | A     | T     | --     | --     | IGR             | SNP | 0.842 | 3  | 16 |
| --          | chr5 | 125871374 | C     | A     | --     | --     | IGR             | SNP | 0.306 | 25 | 11 |
| --          | chr5 | 126043083 | C     | T     | --     | --     | IGR             | SNP | 0.524 | 10 | 11 |
| --          | chr5 | 126525623 | T     | C     | --     | --     | IGR             | SNP | 0.913 | 2  | 21 |
| --          | chr5 | 126804599 | C     | T     | --     | --     | IGR             | SNP | 0.300 | 7  | 3  |
| --          | chr5 | 127325136 | C     | A     | --     | --     | IGR             | SNP | 0.857 | 1  | 6  |
| SLC12A2     | chr5 | 127500557 | G     | T     | --     | --     | Intron          | SNP | 0.300 | 7  | 3  |
| FBN2        | chr5 | 127649270 | A     | G     | --     | --     | Intron          | SNP | 0.103 | 26 | 3  |
| --          | chr5 | 127968170 | G     | A     | --     | --     | IGR             | SNP | 0.263 | 28 | 10 |
| ADAMTS19    | chr5 | 128806111 | T     | A     | --     | --     | Intron          | SNP | 0.583 | 5  | 7  |
| CHSY3       | chr5 | 129424705 | C     | T     | --     | --     | Intron          | SNP | 0.375 | 5  | 3  |
| CHSY3       | chr5 | 129424730 | T     | C     | --     | --     | Intron          | SNP | 0.375 | 5  | 3  |
| --          | chr5 | 129794400 | T     | G     | --     | --     | IGR             | SNP | 0.211 | 15 | 4  |
| --          | chr5 | 130124781 | A     | T     | --     | --     | IGR             | SNP | 0.313 | 11 | 5  |
| --          | chr5 | 130124965 | C     | T     | --     | --     | IGR             | SNP | 0.333 | 6  | 3  |
| --          | chr5 | 130184005 | G     | T     | --     | --     | IGR             | SNP | 0.136 | 19 | 3  |
| --          | chr5 | 130257314 | G     | T     | --     | --     | IGR             | SNP | 0.778 | 2  | 7  |
| --          | chr5 | 131260023 | T     | G     | --     | --     | IGR             | SNP | 0.867 | 2  | 13 |
| --          | chr5 | 131365504 | G     | T     | --     | --     | IGR             | SNP | 0.938 | 1  | 15 |
| --          | chr5 | 131457828 | AC    | -     | --     | --     | IGR             | DEL | 0.176 | 14 | 3  |
| RAD50       | chr5 | 131976454 | C     | T     | C3709T | L1237F | Missense_mutati | SNP | 0.706 | 5  | 12 |
| --          | chr5 | 132327340 | -     | TTA   | --     | --     | IGR             | INS | 0.133 | 13 | 2  |
| --          | chr5 | 132472749 | C     | G     | --     | --     | IGR             | SNP | 0.500 | 4  | 4  |
| FSTL4       | chr5 | 132710984 | CAT   | -     | --     | --     | Intron          | DEL | 0.125 | 14 | 2  |
| --          | chr5 | 132992979 | G     | T     | --     | --     | IGR             | SNP | 0.871 | 4  | 27 |
| --          | chr5 | 133059641 | G     | T     | --     | --     | IGR             | SNP | 0.472 | 28 | 25 |
| CDKL3       | chr5 | 133683413 | G     | A     | --     | --     | Intron          | SNP | 0.190 | 17 | 4  |
| SEC24A      | chr5 | 134011940 | C     | T     | --     | --     | Intron          | SNP | 0.429 | 12 | 9  |
| TXNDC15     | chr5 | 134214791 | C     | T     | --     | --     | Intron          | SNP | 0.923 | 2  | 24 |
| --          | chr5 | 134412852 | C     | T     | --     | --     | IGR             | SNP | 0.333 | 20 | 10 |
| --          | chr5 | 134454105 | C     | T     | --     | --     | IGR             | SNP | 0.912 | 3  | 31 |

|            |      |           |     |   |        |       |         |     |       |    |    |
|------------|------|-----------|-----|---|--------|-------|---------|-----|-------|----|----|
| --         | chr5 | 134845306 | C   | G | --     | --    | IGR     | SNP | 0.467 | 16 | 14 |
| --         | chr5 | 135407793 | G   | T | --     | --    | IGR     | SNP | 0.347 | 32 | 17 |
| SMAD5      | chr5 | 135472959 | A   | C | --     | --    | Intron  | SNP | 0.429 | 4  | 3  |
| --         | chr5 | 136230423 | C   | G | --     | --    | IGR     | SNP | 0.400 | 15 | 10 |
| SPOCK1     | chr5 | 136529697 | G   | T | --     | --    | Intron  | SNP | 0.174 | 19 | 4  |
| --         | chr5 | 136942123 | AG  | - | --     | --    | IGR     | DEL | 0.136 | 19 | 3  |
| KLHL3      | chr5 | 136998745 | C   | T | --     | --    | Intron  | SNP | 0.231 | 10 | 3  |
| --         | chr5 | 137406781 | G   | A | --     | --    | IGR     | SNP | 0.455 | 6  | 5  |
| BRD8       | chr5 | 137485223 | C   | T | --     | --    | Intron  | SNP | 0.962 | 1  | 25 |
| --         | chr5 | 138073072 | C   | G | --     | --    | IGR     | SNP | 0.889 | 2  | 16 |
| SIL1       | chr5 | 138441953 | C   | G | --     | --    | Intron  | SNP | 0.878 | 5  | 36 |
| SIL1       | chr5 | 138500546 | C   | T | --     | --    | Intron  | SNP | 0.889 | 2  | 16 |
| SIL1       | chr5 | 138500934 | C   | T | --     | --    | Intron  | SNP | 1.000 | 0  | 25 |
| --         | chr5 | 138556291 | C   | G | --     | --    | IGR     | SNP | 0.438 | 9  | 7  |
| MATR3      | chr5 | 138622192 | A   | G | --     | --    | Intron  | SNP | 0.632 | 7  | 12 |
| NRG2       | chr5 | 139247380 | T   | A | --     | --    | Intron  | SNP | 0.300 | 7  | 3  |
| NRG2       | chr5 | 139273139 | C   | G | --     | --    | Intron  | SNP | 0.333 | 20 | 10 |
| --         | chr5 | 139532611 | C   | T | --     | --    | IGR     | SNP | 0.348 | 15 | 8  |
| ANKHD1,ANK | chr5 | 139845977 | TC  | - | --     | --    | Intron  | DEL | 0.111 | 16 | 2  |
| --         | chr5 | 140103729 | A   | G | --     | --    | IGR     | SNP | 0.125 | 21 | 3  |
| PCDHA1,PCD | chr5 | 140186604 | G   | C | --     | --    | Intron  | SNP | 0.382 | 21 | 13 |
| PCDHA1,PCD | chr5 | 140362706 | C   | T | --     | --    | Intron  | SNP | 0.867 | 4  | 26 |
| --         | chr5 | 140640909 | C   | T | --     | --    | IGR     | SNP | 0.800 | 7  | 28 |
| PCDHGA3    | chr5 | 140725526 | C   | A | C1926A | L642L | Silent  | SNP | 0.128 | 41 | 6  |
| DIAPH1     | chr5 | 140913625 | G   | A | --     | --    | Intron  | SNP | 0.214 | 11 | 3  |
| DIAPH1     | chr5 | 140945633 | G   | A | --     | --    | Intron  | SNP | 0.947 | 2  | 36 |
| DIAPH1     | chr5 | 140971559 | G   | T | --     | --    | Intron  | SNP | 0.333 | 12 | 6  |
| PCDH1      | chr5 | 141235039 | ACT | - | --     | --    | Intron  | DEL | 0.103 | 26 | 3  |
| --         | chr5 | 141888893 | G   | A | --     | --    | IGR     | SNP | 0.238 | 16 | 5  |
| FGF1       | chr5 | 142004967 | C   | G | --     | --    | Intron  | SNP | 0.379 | 18 | 11 |
| ARHGAP26   | chr5 | 142259914 | C   | G | --     | --    | Intron  | SNP | 0.733 | 8  | 22 |
| ARHGAP26   | chr5 | 142344109 | AAC | - | --     | --    | Intron  | DEL | 0.179 | 23 | 5  |
| ARHGAP26   | chr5 | 142344773 | G   | A | --     | --    | Intron  | SNP | 0.114 | 39 | 5  |
| ARHGAP26   | chr5 | 142344776 | A   | G | --     | --    | Intron  | SNP | 0.114 | 39 | 5  |
| ARHGAP26   | chr5 | 142344785 | T   | G | --     | --    | Intron  | SNP | 0.119 | 37 | 5  |
| --         | chr5 | 143091420 | T   | C | --     | --    | IGR     | SNP | 0.129 | 27 | 4  |
| --         | chr5 | 143133499 | G   | T | --     | --    | IGR     | SNP | 0.833 | 3  | 15 |
| KCTD16     | chr5 | 143822570 | A   | T | --     | --    | Intron  | SNP | 0.882 | 4  | 30 |
| --         | chr5 | 143876261 | T   | A | --     | --    | IGR     | SNP | 0.143 | 18 | 3  |
| --         | chr5 | 143934387 | C   | G | --     | --    | IGR     | SNP | 0.885 | 3  | 23 |
| --         | chr5 | 144093080 | CA  | - | --     | --    | IGR     | DEL | 0.125 | 14 | 2  |
| --         | chr5 | 144158337 | T   | C | --     | --    | IGR     | SNP | 0.794 | 7  | 27 |
| --         | chr5 | 144227080 | A   | G | --     | --    | IGR     | SNP | 0.714 | 2  | 5  |
| --         | chr5 | 144263142 | C   | T | --     | --    | IGR     | SNP | 0.310 | 20 | 9  |
| --         | chr5 | 144331653 | C   | A | --     | --    | IGR     | SNP | 0.423 | 15 | 11 |
| --         | chr5 | 144564107 | C   | G | --     | --    | IGR     | SNP | 0.800 | 3  | 12 |
| --         | chr5 | 144661556 | G   | C | --     | --    | IGR     | SNP | 0.826 | 4  | 19 |
| --         | chr5 | 144800668 | C   | G | --     | --    | IGR     | SNP | 0.667 | 1  | 2  |
| --         | chr5 | 144863122 | T   | A | --     | --    | IGR     | SNP | 0.457 | 19 | 16 |
| --         | chr5 | 145003020 | AT  | - | --     | --    | IGR     | DEL | 0.111 | 16 | 2  |
| PRELID2    | chr5 | 145184074 | A   | G | --     | --    | Intron  | SNP | 0.440 | 14 | 11 |
| PRELID2    | chr5 | 145204788 | C   | A | --     | --    | Intron  | SNP | 0.444 | 5  | 4  |
| SH3RF2     | chr5 | 145386773 | G   | T | --     | --    | Intron  | SNP | 0.439 | 23 | 18 |
| LARS       | chr5 | 145530547 | A   | C | --     | --    | Intron  | SNP | 0.182 | 18 | 4  |
| --         | chr5 | 145713837 | G   | A | --     | --    | IGR     | SNP | 0.294 | 24 | 10 |
| --         | chr5 | 145794287 | C   | G | --     | --    | IGR     | SNP | 0.864 | 3  | 19 |
| PPP2R2B    | chr5 | 146049081 | A   | C | --     | --    | Intron  | SNP | 0.933 | 1  | 14 |
| PPP2R2B    | chr5 | 146382284 | C   | G | --     | --    | Intron  | SNP | 0.667 | 1  | 2  |
| PPP2R2B    | chr5 | 146393975 | T   | G | --     | --    | Intron  | SNP | 0.400 | 9  | 6  |
| --         | chr5 | 146578345 | T   | A | --     | --    | IGR     | SNP | 0.357 | 9  | 5  |
| --         | chr5 | 147228692 | C   | T | --     | --    | IGR     | SNP | 0.875 | 4  | 28 |
| --         | chr5 | 147707996 | G   | T | --     | --    | IGR     | SNP | 0.200 | 16 | 4  |
| --         | chr5 | 147708010 | G   | A | --     | --    | IGR     | SNP | 0.267 | 11 | 4  |
| --         | chr5 | 148453979 | C   | A | --     | --    | IGR     | SNP | 0.383 | 29 | 18 |
| ABLIM3     | chr5 | 148559017 | C   | T | --     | --    | Intron  | SNP | 0.778 | 6  | 21 |
| AFAP1L1    | chr5 | 148689508 | T   | C | --     | --    | Intron  | SNP | 0.125 | 35 | 5  |
| CSNK1A1    | chr5 | 148895865 | C   | A | --     | --    | Intron  | SNP | 0.176 | 28 | 6  |
| SLC26A2    | chr5 | 149353543 | C   | A | --     | --    | Intron  | SNP | 0.143 | 18 | 3  |
| CSF1R      | chr5 | 149461660 | C   | G | --     | --    | Intron  | SNP | 0.865 | 5  | 32 |
| C5orf62    | chr5 | 150157131 | C   | A | --     | --    | 5'Flank | SNP | 0.308 | 9  | 4  |
| --         | chr5 | 150328884 | TG  | - | --     | --    | IGR     | DEL | 0.118 | 30 | 4  |
| ANXA6      | chr5 | 150529696 | T   | A | --     | --    | Intron  | SNP | 0.214 | 22 | 6  |
| --         | chr5 | 150688553 | A   | T | --     | --    | IGR     | SNP | 0.500 | 15 | 15 |
| --         | chr5 | 150736166 | A   | C | --     | --    | IGR     | SNP | 0.500 | 15 | 15 |
| --         | chr5 | 150795981 | C   | T | --     | --    | IGR     | SNP | 0.395 | 23 | 15 |
| --         | chr5 | 151077655 | G   | A | --     | --    | IGR     | SNP | 0.263 | 14 | 5  |
| GLRA1      | chr5 | 151224203 | G   | A | --     | --    | Intron  | SNP | 0.300 | 7  | 3  |
| GLRA1      | chr5 | 151274302 | G   | T | --     | --    | Intron  | SNP | 0.133 | 26 | 4  |
| --         | chr5 | 151594259 | C   | G | --     | --    | IGR     | SNP | 0.853 | 5  | 29 |
| --         | chr5 | 151970914 | C   | T | --     | --    | IGR     | SNP | 0.429 | 4  | 3  |

|                  |      |           |       |   |        |       |                 |     |       |    |    |
|------------------|------|-----------|-------|---|--------|-------|-----------------|-----|-------|----|----|
| --               | chr5 | 151970918 | A     | G | --     | --    | IGR             | SNP | 0.333 | 6  | 3  |
| --               | chr5 | 151989363 | G     | T | --     | --    | IGR             | SNP | 0.292 | 17 | 7  |
| --               | chr5 | 152010409 | G     | T | --     | --    | IGR             | SNP | 0.838 | 6  | 31 |
| --               | chr5 | 152167590 | C     | A | --     | --    | IGR             | SNP | 0.867 | 4  | 26 |
| --               | chr5 | 152354138 | G     | A | --     | --    | IGR             | SNP | 0.857 | 4  | 24 |
| --               | chr5 | 152511844 | A     | T | --     | --    | IGR             | SNP | 0.282 | 28 | 11 |
| --               | chr5 | 152556203 | A     | T | --     | --    | IGR             | SNP | 0.259 | 20 | 7  |
| --               | chr5 | 152691419 | C     | T | --     | --    | IGR             | SNP | 0.222 | 14 | 4  |
| <i>GRIA1</i>     | chr5 | 152909343 | C     | G | --     | --    | Intron          | SNP | 0.968 | 1  | 30 |
| <i>GRIA1</i>     | chr5 | 152946370 | G     | A | --     | --    | Intron          | SNP | 0.273 | 8  | 3  |
| --               | chr5 | 153203812 | G     | A | --     | --    | IGR             | SNP | 0.833 | 5  | 25 |
| --               | chr5 | 153346962 | G     | A | --     | --    | IGR             | SNP | 0.938 | 1  | 15 |
| <i>GALNT10</i>   | chr5 | 153599600 | T     | C | --     | --    | Intron          | SNP | 0.308 | 18 | 8  |
| --               | chr5 | 153971796 | C     | T | --     | --    | IGR             | SNP | 0.611 | 7  | 11 |
| --               | chr5 | 154739768 | G     | A | --     | --    | IGR             | SNP | 0.194 | 29 | 7  |
| --               | chr5 | 154753818 | C     | T | --     | --    | IGR             | SNP | 0.500 | 6  | 6  |
| --               | chr5 | 155038113 | C     | T | --     | --    | IGR             | SNP | 0.600 | 2  | 3  |
| --               | chr5 | 155061281 | A     | T | --     | --    | IGR             | SNP | 0.281 | 23 | 9  |
| --               | chr5 | 155092550 | C     | T | --     | --    | IGR             | SNP | 0.483 | 15 | 14 |
| --               | chr5 | 155367810 | G     | A | --     | --    | IGR             | SNP | 0.852 | 4  | 23 |
| --               | chr5 | 155398228 | G     | T | --     | --    | IGR             | SNP | 0.750 | 8  | 24 |
| --               | chr5 | 155414660 | C     | T | --     | --    | IGR             | SNP | 0.840 | 4  | 21 |
| <i>SGCD</i>      | chr5 | 155801690 | G     | T | --     | --    | Intron          | SNP | 0.444 | 5  | 4  |
| <i>SGCD</i>      | chr5 | 155820124 | A     | T | --     | --    | Intron          | SNP | 0.457 | 25 | 21 |
| <i>SGCD</i>      | chr5 | 155841552 | G     | C | --     | --    | Intron          | SNP | 0.343 | 23 | 12 |
| <i>SGCD</i>      | chr5 | 155892130 | A     | G | --     | --    | Intron          | SNP | 0.310 | 20 | 9  |
| <i>SGCD</i>      | chr5 | 155892131 | G     | T | --     | --    | Intron          | SNP | 0.310 | 20 | 9  |
| <i>SGCD</i>      | chr5 | 156076273 | G     | A | --     | --    | Intron          | SNP | 0.188 | 13 | 3  |
| --               | chr5 | 156328426 | GAA   | - | --     | --    | IGR             | DEL | 0.118 | 30 | 4  |
| <i>HAVCR1</i>    | chr5 | 156468011 | G     | A | --     | --    | Intron          | SNP | 0.136 | 19 | 3  |
| <i>ADAM19</i>    | chr5 | 156931243 | T     | A | --     | --    | Intron          | SNP | 0.103 | 26 | 3  |
| <i>ADAM19</i>    | chr5 | 156949600 | C     | T | --     | --    | Intron          | SNP | 0.367 | 19 | 11 |
| --               | chr5 | 157291803 | C     | T | --     | --    | IGR             | SNP | 0.394 | 20 | 13 |
| --               | chr5 | 157602458 | C     | T | --     | --    | IGR             | SNP | 0.432 | 21 | 16 |
| --               | chr5 | 157889069 | A     | G | --     | --    | IGR             | SNP | 0.520 | 12 | 13 |
| <i>UBLCP1</i>    | chr5 | 158708158 | T     | C | --     | --    | Intron          | SNP | 0.905 | 2  | 19 |
| <i>LOC285626</i> | chr5 | 158774030 | TG    | - | --     | --    | RNA             | DEL | 0.296 | 19 | 8  |
| --               | chr5 | 158829374 | C     | T | --     | --    | IGR             | SNP | 0.788 | 7  | 26 |
| --               | chr5 | 158951326 | C     | T | --     | --    | IGR             | SNP | 0.211 | 15 | 4  |
| --               | chr5 | 158951334 | G     | A | --     | --    | IGR             | SNP | 0.190 | 17 | 4  |
| --               | chr5 | 159002426 | C     | T | --     | --    | IGR             | SNP | 0.368 | 12 | 7  |
| --               | chr5 | 159238256 | A     | G | --     | --    | IGR             | SNP | 0.235 | 13 | 4  |
| --               | chr5 | 159746701 | G     | A | --     | --    | IGR             | SNP | 0.194 | 25 | 6  |
| <i>SLU7</i>      | chr5 | 159832044 | C     | G | G1386C | E462D | Missense_mutati | SNP | 0.781 | 7  | 25 |
| <i>GABRB2</i>    | chr5 | 160974021 | GGT   | - | --     | --    | Intron          | DEL | 0.105 | 17 | 2  |
| --               | chr5 | 161007731 | C     | T | --     | --    | IGR             | SNP | 0.267 | 22 | 8  |
| --               | chr5 | 161058711 | T     | C | --     | --    | IGR             | SNP | 0.452 | 17 | 14 |
| --               | chr5 | 161063670 | T     | C | --     | --    | IGR             | SNP | 0.500 | 11 | 11 |
| --               | chr5 | 161147997 | C     | G | --     | --    | IGR             | SNP | 0.900 | 2  | 18 |
| <i>GABRA1</i>    | chr5 | 161312488 | T     | C | --     | --    | Intron          | SNP | 0.600 | 6  | 9  |
| <i>GABRA1</i>    | chr5 | 161319903 | G     | A | --     | --    | Intron          | SNP | 0.643 | 5  | 9  |
| --               | chr5 | 161353016 | C     | T | --     | --    | IGR             | SNP | 0.429 | 24 | 18 |
| --               | chr5 | 161359092 | G     | T | --     | --    | IGR             | SNP | 0.391 | 14 | 9  |
| --               | chr5 | 161619083 | T     | A | --     | --    | IGR             | SNP | 0.818 | 4  | 18 |
| --               | chr5 | 161706834 | G     | A | --     | --    | IGR             | SNP | 0.121 | 29 | 4  |
| --               | chr5 | 162018996 | G     | T | --     | --    | IGR             | SNP | 0.321 | 19 | 9  |
| --               | chr5 | 162214807 | T     | C | --     | --    | IGR             | SNP | 0.886 | 4  | 31 |
| --               | chr5 | 162311110 | G     | C | --     | --    | IGR             | SNP | 0.286 | 20 | 8  |
| --               | chr5 | 162648922 | G     | A | --     | --    | IGR             | SNP | 0.200 | 24 | 6  |
| <i>CCNG1</i>     | chr5 | 162872646 | A     | T | --     | --    | 3'Flank         | SNP | 0.222 | 14 | 4  |
| --               | chr5 | 162960749 | G     | T | --     | --    | IGR             | SNP | 0.267 | 11 | 4  |
| --               | chr5 | 163055611 | A     | G | --     | --    | IGR             | SNP | 0.324 | 23 | 11 |
| --               | chr5 | 163072047 | TG    | - | --     | --    | IGR             | DEL | 0.103 | 35 | 4  |
| --               | chr5 | 163108065 | C     | T | --     | --    | IGR             | SNP | 0.632 | 7  | 12 |
| --               | chr5 | 163152953 | A     | T | --     | --    | IGR             | SNP | 0.531 | 15 | 17 |
| --               | chr5 | 163206709 | C     | T | --     | --    | IGR             | SNP | 0.333 | 6  | 3  |
| --               | chr5 | 163234264 | A     | T | --     | --    | IGR             | SNP | 0.688 | 10 | 22 |
| --               | chr5 | 163391975 | G     | A | --     | --    | IGR             | SNP | 0.270 | 46 | 17 |
| --               | chr5 | 163557537 | G     | A | --     | --    | IGR             | SNP | 0.308 | 9  | 4  |
| --               | chr5 | 163905050 | A     | C | --     | --    | IGR             | SNP | 0.521 | 23 | 25 |
| --               | chr5 | 164404454 | C     | A | --     | --    | IGR             | SNP | 0.435 | 13 | 10 |
| --               | chr5 | 164445157 | C     | A | --     | --    | IGR             | SNP | 1.000 | 0  | 24 |
| --               | chr5 | 164618768 | T     | A | --     | --    | IGR             | SNP | 0.909 | 2  | 20 |
| --               | chr5 | 164723567 | C     | A | --     | --    | IGR             | SNP | 0.159 | 37 | 7  |
| --               | chr5 | 165015517 | TATAA | - | --     | --    | IGR             | DEL | 0.815 | 5  | 22 |
| --               | chr5 | 165056398 | T     | C | --     | --    | IGR             | SNP | 0.721 | 12 | 31 |
| --               | chr5 | 165160959 | T     | A | --     | --    | IGR             | SNP | 0.846 | 4  | 22 |
| --               | chr5 | 165160960 | C     | A | --     | --    | IGR             | SNP | 0.846 | 4  | 22 |
| --               | chr5 | 165174024 | C     | T | --     | --    | IGR             | SNP | 0.200 | 16 | 4  |
| --               | chr5 | 165174197 | A     | G | --     | --    | IGR             | SNP | 0.240 | 19 | 6  |

|          |      |           |     |       |    |    |        |     |       |    |    |
|----------|------|-----------|-----|-------|----|----|--------|-----|-------|----|----|
| --       | chr5 | 165305484 | G   | C     | -- | -- | IGR    | SNP | 0.441 | 19 | 15 |
| --       | chr5 | 165422976 | T   | C     | -- | -- | IGR    | SNP | 0.481 | 14 | 13 |
| --       | chr5 | 165467749 | T   | G     | -- | -- | IGR    | SNP | 0.833 | 4  | 20 |
| --       | chr5 | 165672599 | C   | A     | -- | -- | IGR    | SNP | 0.526 | 9  | 10 |
| --       | chr5 | 165804387 | G   | T     | -- | -- | IGR    | SNP | 0.556 | 8  | 10 |
| --       | chr5 | 165880502 | T   | C     | -- | -- | IGR    | SNP | 0.844 | 5  | 27 |
| --       | chr5 | 166053909 | A   | T     | -- | -- | IGR    | SNP | 0.611 | 7  | 11 |
| --       | chr5 | 166058045 | C   | A     | -- | -- | IGR    | SNP | 0.800 | 6  | 24 |
| --       | chr5 | 166143310 | A   | T     | -- | -- | IGR    | SNP | 0.250 | 12 | 4  |
| --       | chr5 | 166171676 | A   | T     | -- | -- | IGR    | SNP | 0.500 | 4  | 4  |
| --       | chr5 | 166270502 | A   | G     | -- | -- | IGR    | SNP | 0.333 | 6  | 3  |
| --       | chr5 | 166282542 | G   | T     | -- | -- | IGR    | SNP | 0.324 | 23 | 11 |
| --       | chr5 | 166446198 | T   | C     | -- | -- | IGR    | SNP | 0.897 | 3  | 26 |
| --       | chr5 | 166469653 | G   | C     | -- | -- | IGR    | SNP | 0.455 | 18 | 15 |
| --       | chr5 | 166482738 | AG  | -     | -- | -- | IGR    | DEL | 0.375 | 15 | 9  |
| --       | chr5 | 166496401 | T   | A     | -- | -- | IGR    | SNP | 0.333 | 12 | 6  |
| ODZ2     | chr5 | 166963524 | A   | G     | -- | -- | Intron | SNP | 0.515 | 16 | 17 |
| ODZ2     | chr5 | 167328695 | A   | G     | -- | -- | Intron | SNP | 0.367 | 19 | 11 |
| ODZ2     | chr5 | 167623445 | A   | T     | -- | -- | Intron | SNP | 0.125 | 21 | 3  |
| ODZ2     | chr5 | 167626538 | C   | G     | -- | -- | Intron | SNP | 0.108 | 33 | 4  |
| WWC1     | chr5 | 167760418 | C   | G     | -- | -- | Intron | SNP | 0.868 | 5  | 33 |
| WWC1     | chr5 | 167866475 | C   | A     | -- | -- | Intron | SNP | 0.240 | 19 | 6  |
| --       | chr5 | 168070931 | G   | A     | -- | -- | IGR    | SNP | 0.286 | 15 | 6  |
| SLIT3    | chr5 | 168471592 | T   | G     | -- | -- | Intron | SNP | 0.556 | 4  | 5  |
| SLIT3    | chr5 | 168561313 | A   | G     | -- | -- | Intron | SNP | 0.129 | 27 | 4  |
| SLIT3    | chr5 | 168688571 | T   | G     | -- | -- | Intron | SNP | 0.296 | 19 | 8  |
| --       | chr5 | 168804948 | GAC | -     | -- | -- | IGR    | DEL | 0.111 | 24 | 3  |
| KCNIP1   | chr5 | 169877686 | G   | A     | -- | -- | Intron | SNP | 0.815 | 5  | 22 |
| KCNIP1   | chr5 | 169944775 | T   | C     | -- | -- | Intron | SNP | 0.278 | 26 | 10 |
| --       | chr5 | 170190694 | C   | T     | -- | -- | IGR    | SNP | 0.143 | 18 | 3  |
| --       | chr5 | 170190695 | A   | G     | -- | -- | IGR    | SNP | 0.136 | 19 | 3  |
| RANBP17  | chr5 | 170527639 | C   | T     | -- | -- | Intron | SNP | 0.917 | 1  | 11 |
| RANBP17  | chr5 | 170530671 | G   | C     | -- | -- | Intron | SNP | 0.457 | 19 | 16 |
| RANBP17  | chr5 | 170552320 | G   | A     | -- | -- | Intron | SNP | 0.182 | 18 | 4  |
| RANBP17  | chr5 | 170621860 | T   | A     | -- | -- | Intron | SNP | 0.545 | 15 | 18 |
| --       | chr5 | 171092006 | G   | T     | -- | -- | IGR    | SNP | 0.111 | 32 | 4  |
| --       | chr5 | 171208216 | C   | G     | -- | -- | IGR    | SNP | 0.500 | 15 | 15 |
| --       | chr5 | 171733214 | G   | T     | -- | -- | IGR    | SNP | 0.222 | 14 | 4  |
| --       | chr5 | 171998032 | A   | G     | -- | -- | IGR    | SNP | 0.273 | 8  | 3  |
| --       | chr5 | 172019564 | T   | C     | -- | -- | IGR    | SNP | 0.167 | 30 | 6  |
| --       | chr5 | 172235551 | C   | T     | -- | -- | IGR    | SNP | 0.214 | 11 | 3  |
| --       | chr5 | 172251539 | A   | C     | -- | -- | IGR    | SNP | 0.107 | 25 | 3  |
| --       | chr5 | 173904225 | G   | T     | -- | -- | IGR    | SNP | 0.364 | 7  | 4  |
| --       | chr5 | 174072020 | A   | T     | -- | -- | IGR    | SNP | 0.211 | 15 | 4  |
| --       | chr5 | 174072022 | G   | A     | -- | -- | IGR    | SNP | 0.250 | 15 | 5  |
| --       | chr5 | 174311220 | G   | A     | -- | -- | IGR    | SNP | 0.300 | 14 | 6  |
| --       | chr5 | 174397755 | T   | A     | -- | -- | IGR    | SNP | 0.392 | 31 | 20 |
| --       | chr5 | 175177929 | G   | C     | -- | -- | IGR    | SNP | 0.435 | 13 | 10 |
| --       | chr5 | 175350381 | A   | C     | -- | -- | IGR    | SNP | 0.104 | 43 | 5  |
| --       | chr5 | 175374454 | -   | ACCTC | -- | -- | IGR    | INS | 0.143 | 12 | 2  |
| THOC3    | chr5 | 175389318 | T   | A     | -- | -- | Intron | SNP | 0.410 | 23 | 16 |
| --       | chr5 | 175488572 | G   | T     | -- | -- | IGR    | SNP | 0.214 | 33 | 9  |
| FAM153B  | chr5 | 175521836 | GC  | -     | -- | -- | Intron | DEL | 0.176 | 14 | 3  |
| --       | chr5 | 175561604 | A   | G     | -- | -- | IGR    | SNP | 0.850 | 3  | 17 |
| C5orf25  | chr5 | 175733581 | C   | T     | -- | -- | Intron | SNP | 0.190 | 17 | 4  |
| UNC5A    | chr5 | 176289859 | G   | A     | -- | -- | Intron | SNP | 0.163 | 36 | 7  |
| UIMC1    | chr5 | 176387906 | T   | C     | -- | -- | Intron | SNP | 0.273 | 8  | 3  |
| ZNF346   | chr5 | 176454587 | C   | A     | -- | -- | Intron | SNP | 0.250 | 12 | 4  |
| FAM153C  | chr5 | 177467290 | -   | GA    | -- | -- | RNA    | INS | 0.133 | 13 | 2  |
| FAM153C  | chr5 | 177469359 | T   | C     | -- | -- | RNA    | SNP | 0.154 | 22 | 4  |
| FAM153C  | chr5 | 177469360 | G   | A     | -- | -- | RNA    | SNP | 0.160 | 21 | 4  |
| COL23A1  | chr5 | 177823740 | C   | T     | -- | -- | Intron | SNP | 0.278 | 13 | 5  |
| --       | chr5 | 178055662 | G   | A     | -- | -- | IGR    | SNP | 0.838 | 6  | 31 |
| --       | chr5 | 178836411 | G   | A     | -- | -- | IGR    | SNP | 0.200 | 16 | 4  |
| --       | chr5 | 178841624 | C   | T     | -- | -- | IGR    | SNP | 0.353 | 33 | 18 |
| RASGEF1C | chr5 | 179540608 | T   | C     | -- | -- | Intron | SNP | 0.217 | 36 | 10 |
| RASGEF1C | chr5 | 179592768 | G   | T     | -- | -- | Intron | SNP | 0.571 | 3  | 4  |
| RASGEF1C | chr5 | 179610206 | C   | G     | -- | -- | Intron | SNP | 0.250 | 24 | 8  |
| --       | chr5 | 179912933 | G   | C     | -- | -- | IGR    | SNP | 0.286 | 15 | 6  |
| --       | chr5 | 179913320 | CCT | -     | -- | -- | IGR    | DEL | 0.211 | 15 | 4  |
| --       | chr5 | 179913362 | -   | CCT   | -- | -- | IGR    | INS | 0.176 | 14 | 3  |
| FLT4     | chr5 | 180044184 | A   | C     | -- | -- | Intron | SNP | 0.286 | 15 | 6  |
| --       | chr5 | 180135126 | C   | T     | -- | -- | IGR    | SNP | 0.103 | 26 | 3  |
| BTNL8    | chr5 | 180358493 | CA  | -     | -- | -- | Intron | DEL | 0.143 | 12 | 2  |
| BTNL8    | chr5 | 180358533 | AT  | -     | -- | -- | Intron | DEL | 0.105 | 17 | 2  |
| --       | chr5 | 180703677 | C   | A     | -- | -- | IGR    | SNP | 0.149 | 40 | 7  |
| --       | chr5 | 180812694 | C   | T     | -- | -- | IGR    | SNP | 0.600 | 6  | 9  |
| --       | chr5 | 180812790 | T   | C     | -- | -- | IGR    | SNP | 0.333 | 12 | 6  |
| --       | chr5 | 180812834 | C   | T     | -- | -- | IGR    | SNP | 0.519 | 13 | 14 |
| --       | chr5 | 180813181 | C   | G     | -- | -- | IGR    | SNP | 0.333 | 4  | 2  |

|             |      |          |       |    |       |      |                 |     |       |    |    |
|-------------|------|----------|-------|----|-------|------|-----------------|-----|-------|----|----|
| --          | chr6 | 119280   | G     | T  | --    | --   | IGR             | SNP | 0.412 | 10 | 7  |
| --          | chr6 | 125738   | A     | C  | --    | --   | IGR             | SNP | 0.188 | 13 | 3  |
| --          | chr6 | 149813   | ATCTC | -  | --    | --   | IGR             | DEL | 0.133 | 26 | 4  |
| --          | chr6 | 201265   | C     | T  | --    | --   | IGR             | SNP | 0.133 | 26 | 4  |
| --          | chr6 | 261669   | G     | A  | --    | --   | IGR             | SNP | 0.284 | 68 | 27 |
| --          | chr6 | 469658   | C     | T  | --    | --   | IGR             | SNP | 0.300 | 7  | 3  |
| EXOC2       | chr6 | 602331   | CCA   | -  | --    | --   | Intron          | DEL | 0.258 | 63 | 23 |
| EXOC2       | chr6 | 602402   | G     | C  | --    | --   | Intron          | SNP | 0.109 | 41 | 5  |
| EXOC2       | chr6 | 631723   | TACA  | -  | --    | --   | Intron          | DEL | 0.250 | 30 | 10 |
| EXOC2       | chr6 | 675519   | A     | G  | --    | --   | Intron          | SNP | 0.167 | 20 | 4  |
| --          | chr6 | 862350   | C     | T  | --    | --   | IGR             | SNP | 0.103 | 35 | 4  |
| --          | chr6 | 934625   | G     | T  | --    | --   | IGR             | SNP | 0.317 | 43 | 20 |
| GMDS        | chr6 | 1749238  | T     | G  | --    | --   | Intron          | SNP | 0.596 | 19 | 28 |
| GMDS        | chr6 | 1927401  | G     | A  | --    | --   | Intron          | SNP | 0.352 | 35 | 19 |
| GMDS        | chr6 | 2106011  | C     | A  | --    | --   | Intron          | SNP | 0.264 | 39 | 14 |
| --          | chr6 | 2249795  | G     | A  | --    | --   | IGR             | SNP | 0.257 | 26 | 9  |
| --          | chr6 | 2398459  | G     | C  | --    | --   | IGR             | SNP | 0.667 | 18 | 36 |
| SERPINB9    | chr6 | 2893952  | T     | C  | --    | --   | Intron          | SNP | 0.218 | 43 | 12 |
| --          | chr6 | 2976046  | C     | T  | --    | --   | IGR             | SNP | 0.361 | 23 | 13 |
| RIPK1       | chr6 | 3091121  | C     | T  | --    | --   | Intron          | SNP | 0.300 | 7  | 3  |
| BPHL        | chr6 | 3121525  | C     | T  | --    | --   | Intron          | SNP | 0.190 | 17 | 4  |
| SLC22A23    | chr6 | 3346851  | C     | A  | --    | --   | Intron          | SNP | 0.303 | 46 | 20 |
| SLC22A23    | chr6 | 3395861  | T     | C  | --    | --   | Intron          | SNP | 0.268 | 41 | 15 |
| --          | chr6 | 3505543  | A     | T  | --    | --   | IGR             | SNP | 0.281 | 41 | 16 |
| --          | chr6 | 3506364  | C     | A  | --    | --   | IGR             | SNP | 0.114 | 62 | 8  |
| --          | chr6 | 3550514  | T     | C  | --    | --   | IGR             | SNP | 0.276 | 21 | 8  |
| --          | chr6 | 3762226  | C     | G  | --    | --   | IGR             | SNP | 0.675 | 13 | 27 |
| --          | chr6 | 3942263  | G     | A  | --    | --   | IGR             | SNP | 0.250 | 12 | 4  |
| --          | chr6 | 3942648  | T     | C  | --    | --   | IGR             | SNP | 0.457 | 19 | 16 |
| C6orf201    | chr6 | 4080240  | C     | T  | --    | --   | Intron          | SNP | 0.367 | 19 | 11 |
| --          | chr6 | 4169889  | G     | A  | --    | --   | IGR             | SNP | 0.200 | 32 | 8  |
| --          | chr6 | 4516984  | -     | GT | --    | --   | IGR             | INS | 0.162 | 31 | 6  |
| --          | chr6 | 4634529  | G     | A  | --    | --   | IGR             | SNP | 0.238 | 32 | 10 |
| --          | chr6 | 4751084  | TC    | -  | --    | --   | IGR             | DEL | 0.105 | 17 | 2  |
| --          | chr6 | 5038755  | A     | G  | --    | --   | IGR             | SNP | 0.308 | 9  | 4  |
| --          | chr6 | 5091348  | T     | C  | --    | --   | IGR             | SNP | 0.681 | 15 | 32 |
| LYRM4       | chr6 | 5144890  | G     | A  | --    | --   | Intron          | SNP | 0.273 | 8  | 3  |
| FARS2       | chr6 | 5600265  | G     | T  | --    | --   | Intron          | SNP | 0.646 | 17 | 31 |
| --          | chr6 | 5820398  | C     | T  | --    | --   | IGR             | SNP | 0.226 | 24 | 7  |
| --          | chr6 | 5845548  | A     | G  | --    | --   | IGR             | SNP | 0.156 | 27 | 5  |
| --          | chr6 | 5942590  | C     | A  | --    | --   | IGR             | SNP | 0.255 | 35 | 12 |
| --          | chr6 | 6031104  | T     | C  | --    | --   | IGR             | SNP | 0.156 | 27 | 5  |
| --          | chr6 | 6046372  | A     | T  | --    | --   | IGR             | SNP | 0.444 | 5  | 4  |
| --          | chr6 | 6047300  | G     | A  | --    | --   | IGR             | SNP | 0.304 | 39 | 17 |
| F13A1       | chr6 | 6154953  | T     | G  | --    | --   | Intron          | SNP | 0.163 | 36 | 7  |
| F13A1       | chr6 | 6263367  | T     | C  | --    | --   | Intron          | SNP | 0.282 | 28 | 11 |
| LY86-AS1    | chr6 | 6430716  | G     | C  | --    | --   | RNA             | SNP | 0.333 | 22 | 11 |
| --          | chr6 | 7040179  | C     | A  | --    | --   | IGR             | SNP | 0.303 | 23 | 10 |
| --          | chr6 | 7040316  | C     | T  | --    | --   | IGR             | SNP | 0.217 | 36 | 10 |
| RREB1       | chr6 | 7155463  | C     | T  | --    | --   | Intron          | SNP | 0.340 | 35 | 18 |
| CAGE1       | chr6 | 7366237  | G     | T  | --    | --   | Intron          | SNP | 0.103 | 26 | 3  |
| RIOK1       | chr6 | 7393433  | A     | T  | A173T | E58V | Missense_mutati | SNP | 0.174 | 38 | 8  |
| --          | chr6 | 7480779  | T     | A  | --    | --   | IGR             | SNP | 0.222 | 14 | 4  |
| --          | chr6 | 7660950  | C     | T  | --    | --   | IGR             | SNP | 0.279 | 31 | 12 |
| BMP6        | chr6 | 7788782  | G     | A  | --    | --   | Intron          | SNP | 0.243 | 28 | 9  |
| BMP6        | chr6 | 7865638  | G     | A  | --    | --   | Intron          | SNP | 0.174 | 38 | 8  |
| LOC1005062C | chr6 | 8678703  | C     | T  | --    | --   | RNA             | SNP | 0.458 | 26 | 22 |
| --          | chr6 | 8800423  | G     | A  | --    | --   | IGR             | SNP | 0.194 | 29 | 7  |
| --          | chr6 | 8804764  | T     | A  | --    | --   | IGR             | SNP | 0.156 | 27 | 5  |
| --          | chr6 | 8974084  | T     | G  | --    | --   | IGR             | SNP | 0.209 | 34 | 9  |
| --          | chr6 | 9032950  | C     | G  | --    | --   | IGR             | SNP | 0.286 | 40 | 16 |
| --          | chr6 | 9043738  | T     | G  | --    | --   | IGR             | SNP | 0.259 | 40 | 14 |
| --          | chr6 | 9136904  | C     | T  | --    | --   | IGR             | SNP | 0.240 | 19 | 6  |
| --          | chr6 | 9746834  | G     | T  | --    | --   | IGR             | SNP | 0.487 | 20 | 19 |
| --          | chr6 | 9810989  | A     | G  | --    | --   | IGR             | SNP | 0.306 | 25 | 11 |
| --          | chr6 | 9990317  | AAT   | -  | --    | --   | IGR             | DEL | 0.129 | 27 | 4  |
| --          | chr6 | 10100786 | G     | A  | --    | --   | IGR             | SNP | 0.667 | 12 | 24 |
| --          | chr6 | 10332746 | C     | T  | --    | --   | IGR             | SNP | 0.348 | 15 | 8  |
| --          | chr6 | 10423874 | A     | G  | --    | --   | IGR             | SNP | 0.138 | 25 | 4  |
| NEDD9       | chr6 | 11197497 | -     | TC | --    | --   | Intron          | INS | 0.361 | 23 | 13 |
| NEDD9       | chr6 | 11340217 | T     | G  | --    | --   | Intron          | SNP | 0.417 | 21 | 15 |
| HIVEP1      | chr6 | 12108713 | C     | T  | --    | --   | Intron          | SNP | 0.333 | 16 | 8  |
| --          | chr6 | 12218949 | C     | T  | --    | --   | IGR             | SNP | 0.170 | 39 | 8  |
| PHACTR1     | chr6 | 13046607 | C     | A  | --    | --   | Intron          | SNP | 0.273 | 48 | 18 |
| PHACTR1     | chr6 | 13224444 | C     | G  | --    | --   | Intron          | SNP | 0.281 | 41 | 16 |
| PHACTR1     | chr6 | 13263454 | A     | T  | --    | --   | Intron          | SNP | 0.200 | 16 | 4  |
| PHACTR1     | chr6 | 13275216 | C     | G  | --    | --   | Intron          | SNP | 0.220 | 32 | 9  |
| --          | chr6 | 13506539 | C     | T  | --    | --   | IGR             | SNP | 0.375 | 10 | 6  |
| --          | chr6 | 13558317 | T     | A  | --    | --   | IGR             | SNP | 0.188 | 26 | 6  |
| --          | chr6 | 13558750 | C     | T  | --    | --   | IGR             | SNP | 0.184 | 31 | 7  |

|           |      |          |        |     |    |    |         |     |       |    |    |
|-----------|------|----------|--------|-----|----|----|---------|-----|-------|----|----|
| --        | chr6 | 14645679 | C      | T   | -- | -- | IGR     | SNP | 0.348 | 43 | 23 |
| --        | chr6 | 14887113 | G      | A   | -- | -- | IGR     | SNP | 0.682 | 21 | 45 |
| --        | chr6 | 15088621 | C      | T   | -- | -- | IGR     | SNP | 0.167 | 15 | 3  |
| --        | chr6 | 15127976 | G      | T   | -- | -- | IGR     | SNP | 0.545 | 15 | 18 |
| JARID2    | chr6 | 15284759 | G      | T   | -- | -- | Intron  | SNP | 0.190 | 17 | 4  |
| --        | chr6 | 16197465 | G      | T   | -- | -- | IGR     | SNP | 0.381 | 13 | 8  |
| ATXN1     | chr6 | 16467789 | G      | T   | -- | -- | Intron  | SNP | 0.340 | 33 | 17 |
| ATXN1     | chr6 | 16467790 | A      | T   | -- | -- | Intron  | SNP | 0.333 | 34 | 17 |
| ATXN1     | chr6 | 16585733 | A      | T   | -- | -- | Intron  | SNP | 0.333 | 16 | 8  |
| ATXN1     | chr6 | 16701831 | -      | CA  | -- | -- | Intron  | INS | 0.194 | 25 | 6  |
| ATXN1     | chr6 | 16701857 | G      | T   | -- | -- | Intron  | SNP | 0.167 | 30 | 6  |
| --        | chr6 | 16890263 | C      | T   | -- | -- | IGR     | SNP | 0.143 | 24 | 4  |
| --        | chr6 | 16890272 | C      | T   | -- | -- | IGR     | SNP | 0.143 | 24 | 4  |
| FLJ23152  | chr6 | 17124875 | G      | T   | -- | -- | Intron  | SNP | 0.409 | 26 | 18 |
| --        | chr6 | 17158758 | -      | AT  | -- | -- | IGR     | INS | 0.211 | 15 | 4  |
| --        | chr6 | 17163352 | G      | T   | -- | -- | IGR     | SNP | 0.348 | 30 | 16 |
| --        | chr6 | 17233490 | C      | A   | -- | -- | IGR     | SNP | 0.308 | 9  | 4  |
| --        | chr6 | 17384897 | G      | A   | -- | -- | IGR     | SNP | 0.476 | 22 | 20 |
| CAP2      | chr6 | 17518420 | T      | C   | -- | -- | Intron  | SNP | 0.111 | 24 | 3  |
| --        | chr6 | 18111967 | G      | T   | -- | -- | IGR     | SNP | 0.250 | 12 | 4  |
| --        | chr6 | 18271191 | A      | T   | -- | -- | IGR     | SNP | 0.239 | 35 | 11 |
| --        | chr6 | 18316509 | G      | A   | -- | -- | IGR     | SNP | 0.333 | 22 | 11 |
| --        | chr6 | 18533710 | C      | T   | -- | -- | IGR     | SNP | 0.156 | 27 | 5  |
| --        | chr6 | 18581842 | C      | T   | -- | -- | IGR     | SNP | 0.125 | 21 | 3  |
| --        | chr6 | 18700321 | G      | C   | -- | -- | IGR     | SNP | 0.317 | 28 | 13 |
| --        | chr6 | 18756753 | G      | A   | -- | -- | IGR     | SNP | 0.190 | 17 | 4  |
| --        | chr6 | 18786057 | C      | G   | -- | -- | IGR     | SNP | 0.250 | 33 | 11 |
| --        | chr6 | 18945911 | C      | A   | -- | -- | IGR     | SNP | 0.279 | 31 | 12 |
| --        | chr6 | 19327098 | G      | A   | -- | -- | IGR     | SNP | 0.571 | 18 | 24 |
| --        | chr6 | 19389042 | G      | A   | -- | -- | IGR     | SNP | 0.125 | 21 | 3  |
| --        | chr6 | 19868403 | ACT    | -   | -- | -- | IGR     | DEL | 0.106 | 42 | 5  |
| --        | chr6 | 19923985 | G      | T   | -- | -- | IGR     | SNP | 0.174 | 19 | 4  |
| --        | chr6 | 20314308 | C      | A   | -- | -- | IGR     | SNP | 0.209 | 34 | 9  |
| E2F3      | chr6 | 20468923 | T      | G   | -- | -- | Intron  | SNP | 0.245 | 40 | 13 |
| --        | chr6 | 20530364 | A      | C   | -- | -- | IGR     | SNP | 0.333 | 22 | 11 |
| CDKAL1    | chr6 | 20665688 | A      | T   | -- | -- | Intron  | SNP | 0.145 | 53 | 9  |
| CDKAL1    | chr6 | 21120289 | C      | G   | -- | -- | Intron  | SNP | 0.214 | 33 | 9  |
| CDKAL1    | chr6 | 21141396 | C      | T   | -- | -- | Intron  | SNP | 0.326 | 29 | 14 |
| --        | chr6 | 21254675 | A      | T   | -- | -- | IGR     | SNP | 0.314 | 35 | 16 |
| --        | chr6 | 21276091 | C      | T   | -- | -- | IGR     | SNP | 0.160 | 21 | 4  |
| --        | chr6 | 21456010 | CCTCTT | -   | -- | -- | IGR     | DEL | 0.255 | 35 | 12 |
| --        | chr6 | 21486942 | T      | C   | -- | -- | IGR     | SNP | 0.385 | 32 | 20 |
| LINC00340 | chr6 | 21686609 | C      | T   | -- | -- | RNA     | SNP | 0.222 | 14 | 4  |
| LINC00340 | chr6 | 21718675 | A      | T   | -- | -- | RNA     | SNP | 0.273 | 16 | 6  |
| LINC00340 | chr6 | 22055468 | T      | A   | -- | -- | RNA     | SNP | 0.161 | 26 | 5  |
| LINC00340 | chr6 | 22168426 | T      | C   | -- | -- | RNA     | SNP | 0.533 | 7  | 8  |
| --        | chr6 | 22420703 | G      | C   | -- | -- | IGR     | SNP | 0.611 | 14 | 22 |
| --        | chr6 | 22587983 | A      | G   | -- | -- | IGR     | SNP | 0.553 | 17 | 21 |
| --        | chr6 | 22645564 | C      | G   | -- | -- | IGR     | SNP | 0.257 | 26 | 9  |
| --        | chr6 | 22932585 | C      | T   | -- | -- | IGR     | SNP | 0.250 | 24 | 8  |
| --        | chr6 | 22937549 | A      | G   | -- | -- | IGR     | SNP | 0.310 | 29 | 13 |
| --        | chr6 | 23078904 | T      | A   | -- | -- | IGR     | SNP | 0.357 | 18 | 10 |
| --        | chr6 | 23078906 | G      | A   | -- | -- | IGR     | SNP | 0.310 | 20 | 9  |
| --        | chr6 | 23242762 | C      | T   | -- | -- | IGR     | SNP | 0.620 | 19 | 31 |
| --        | chr6 | 23364107 | TC     | -   | -- | -- | IGR     | DEL | 0.167 | 15 | 3  |
| --        | chr6 | 23653610 | G      | C   | -- | -- | IGR     | SNP | 0.698 | 13 | 30 |
| DCDC2     | chr6 | 24302158 | G      | A   | -- | -- | Intron  | SNP | 0.366 | 26 | 15 |
| DCDC2     | chr6 | 24378077 | C      | T   | -- | -- | Intron  | SNP | 0.295 | 31 | 13 |
| --        | chr6 | 25753532 | A      | C   | -- | -- | IGR     | SNP | 0.367 | 31 | 18 |
| SLC17A3   | chr6 | 25860526 | G      | A   | -- | -- | Intron  | SNP | 0.390 | 25 | 16 |
| HIST1H4A  | chr6 | 26022544 | C      | T   | -- | -- | 3'Flank | SNP | 0.333 | 32 | 16 |
| HFE       | chr6 | 26091030 | C      | T   | -- | -- | Intron  | SNP | 0.333 | 38 | 19 |
| HIST1H2BD | chr6 | 26166754 | G      | T   | -- | -- | Intron  | SNP | 0.311 | 31 | 14 |
| --        | chr6 | 26207746 | C      | G   | -- | -- | IGR     | SNP | 0.173 | 62 | 13 |
| HIST1H2BG | chr6 | 26215510 | C      | T   | -- | -- | 3'Flank | SNP | 0.636 | 12 | 21 |
| --        | chr6 | 26576447 | A      | T   | -- | -- | IGR     | SNP | 0.184 | 31 | 7  |
| --        | chr6 | 26745450 | G      | C   | -- | -- | IGR     | SNP | 0.692 | 12 | 27 |
| --        | chr6 | 26801502 | -      | CCA | -- | -- | IGR     | INS | 0.111 | 16 | 2  |
| GUSBP2    | chr6 | 26879222 | T      | C   | -- | -- | RNA     | SNP | 0.143 | 24 | 4  |
| GUSBP2    | chr6 | 26879239 | T      | C   | -- | -- | RNA     | SNP | 0.133 | 26 | 4  |
| GUSBP2    | chr6 | 26879385 | -      | CA  | -- | -- | RNA     | INS | 0.115 | 23 | 3  |
| GUSBP2    | chr6 | 26885071 | -      | TTC | -- | -- | RNA     | INS | 0.103 | 35 | 4  |
| GUSBP2    | chr6 | 26904638 | G      | C   | -- | -- | RNA     | SNP | 0.640 | 9  | 16 |
| --        | chr6 | 27239382 | C      | T   | -- | -- | IGR     | SNP | 0.333 | 18 | 9  |
| --        | chr6 | 27239384 | T      | C   | -- | -- | IGR     | SNP | 0.333 | 18 | 9  |
| --        | chr6 | 27473571 | G      | T   | -- | -- | IGR     | SNP | 0.286 | 40 | 16 |
| --        | chr6 | 27828451 | C      | A   | -- | -- | IGR     | SNP | 0.250 | 27 | 9  |
| --        | chr6 | 28280608 | C      | T   | -- | -- | IGR     | SNP | 0.211 | 15 | 4  |
| ZKSCAN3   | chr6 | 28335814 | A      | C   | -- | -- | 3'UTR   | SNP | 0.263 | 14 | 5  |
| --        | chr6 | 28374124 | G      | A   | -- | -- | IGR     | SNP | 0.105 | 34 | 4  |

|             |      |          |     |   |        |       |                 |     |       |    |    |
|-------------|------|----------|-----|---|--------|-------|-----------------|-----|-------|----|----|
| --          | chr6 | 28467369 | A   | T | --     | --    | IGR             | SNP | 0.190 | 34 | 8  |
| --          | chr6 | 28612551 | G   | A | --     | --    | IGR             | SNP | 0.278 | 26 | 10 |
| --          | chr6 | 28789138 | C   | A | --     | --    | IGR             | SNP | 0.182 | 18 | 4  |
| --          | chr6 | 28835308 | C   | T | --     | --    | IGR             | SNP | 0.161 | 26 | 5  |
| --          | chr6 | 29255154 | G   | A | --     | --    | IGR             | SNP | 0.292 | 17 | 7  |
| --          | chr6 | 29841249 | G   | A | --     | --    | IGR             | SNP | 0.242 | 25 | 8  |
| --          | chr6 | 30101065 | C   | A | --     | --    | IGR             | SNP | 0.196 | 37 | 9  |
| MDC1        | chr6 | 30678215 | C   | T | --     | --    | Intron          | SNP | 0.156 | 27 | 5  |
| --          | chr6 | 30907474 | C   | G | --     | --    | IGR             | SNP | 0.273 | 32 | 12 |
| --          | chr6 | 30923572 | A   | T | --     | --    | IGR             | SNP | 0.162 | 31 | 6  |
| --          | chr6 | 31184487 | A   | G | --     | --    | IGR             | SNP | 0.306 | 50 | 22 |
| --          | chr6 | 31568006 | G   | T | --     | --    | IGR             | SNP | 0.250 | 12 | 4  |
| TNXB        | chr6 | 32030898 | C   | T | --     | --    | Intron          | SNP | 0.292 | 17 | 7  |
| --          | chr6 | 32211054 | CTG | - | --     | --    | IGR             | DEL | 0.133 | 13 | 2  |
| --          | chr6 | 32253917 | C   | T | --     | --    | IGR             | SNP | 0.578 | 19 | 26 |
| C6orf10     | chr6 | 32301324 | C   | G | --     | --    | Intron          | SNP | 0.425 | 23 | 17 |
| HLA-DQA1    | chr6 | 32605344 | C   | T | --     | --    | Intron          | SNP | 0.364 | 14 | 8  |
| --          | chr6 | 33060939 | T   | A | --     | --    | IGR             | SNP | 0.186 | 57 | 13 |
| --          | chr6 | 33060940 | G   | T | --     | --    | IGR             | SNP | 0.191 | 55 | 13 |
| --          | chr6 | 33064501 | G   | A | --     | --    | IGR             | SNP | 0.650 | 14 | 26 |
| SYNGAP1     | chr6 | 33391478 | A   | G | --     | --    | Intron          | SNP | 0.228 | 44 | 13 |
| SYNGAP1     | chr6 | 33413497 | C   | A | --     | --    | Intron          | SNP | 0.389 | 22 | 14 |
| --          | chr6 | 33449142 | G   | A | --     | --    | IGR             | SNP | 0.500 | 20 | 20 |
| LEMD2       | chr6 | 33739580 | C   | T | --     | --    | 3'UTR           | SNP | 0.267 | 22 | 8  |
| --          | chr6 | 33841386 | C   | G | --     | --    | IGR             | SNP | 0.250 | 27 | 9  |
| GRM4        | chr6 | 34040708 | AC  | - | --     | --    | Intron          | DEL | 0.268 | 71 | 26 |
| RPS10-NUDT  | chr6 | 34367590 | G   | C | --     | --    | Intron          | SNP | 0.538 | 12 | 14 |
| PACSN1      | chr6 | 34453608 | G   | A | --     | --    | Intron          | SNP | 0.236 | 42 | 13 |
| C6orf106    | chr6 | 34594385 | T   | A | --     | --    | Intron          | SNP | 0.348 | 30 | 16 |
| --          | chr6 | 35077412 | C   | T | --     | --    | IGR             | SNP | 0.211 | 15 | 4  |
| TCP11       | chr6 | 35094427 | C   | T | --     | --    | Intron          | SNP | 0.154 | 22 | 4  |
| FKBP5       | chr6 | 35584117 | G   | A | --     | --    | Intron          | SNP | 0.190 | 17 | 4  |
| FKBP5       | chr6 | 35642545 | G   | A | --     | --    | Intron          | SNP | 0.643 | 20 | 36 |
| LHFPL5      | chr6 | 35788979 | G   | T | --     | --    | Intron          | SNP | 0.293 | 29 | 12 |
| LHFPL5      | chr6 | 35791207 | T   | C | --     | --    | 3'UTR           | SNP | 0.152 | 28 | 5  |
| STK38       | chr6 | 36463056 | G   | A | --     | --    | 3'UTR           | SNP | 0.750 | 15 | 45 |
| --          | chr6 | 36535641 | G   | A | --     | --    | IGR             | SNP | 0.125 | 42 | 6  |
| --          | chr6 | 37302713 | C   | T | --     | --    | IGR             | SNP | 0.325 | 27 | 13 |
| --          | chr6 | 37502558 | A   | G | --     | --    | IGR             | SNP | 0.182 | 18 | 4  |
| MDGA1       | chr6 | 37619997 | T   | C | A1102G | T368A | Missense_mutati | SNP | 0.314 | 35 | 16 |
| ZFAND3      | chr6 | 38010626 | C   | T | --     | --    | Intron          | SNP | 0.375 | 20 | 12 |
| BTBD9       | chr6 | 38239313 | T   | A | --     | --    | Intron          | SNP | 0.316 | 26 | 12 |
| DNAH8       | chr6 | 38751132 | C   | A | --     | --    | Intron          | SNP | 0.333 | 28 | 14 |
| LOC10013104 | chr6 | 38876456 | G   | A | --     | --    | RNA             | SNP | 0.547 | 24 | 29 |
| --          | chr6 | 39224694 | G   | T | --     | --    | IGR             | SNP | 0.200 | 16 | 4  |
| --          | chr6 | 39227493 | C   | G | --     | --    | IGR             | SNP | 0.658 | 13 | 25 |
| --          | chr6 | 39293378 | A   | C | --     | --    | IGR             | SNP | 0.641 | 14 | 25 |
| KIF6        | chr6 | 39395532 | G   | T | --     | --    | Intron          | SNP | 0.125 | 35 | 5  |
| KIF6        | chr6 | 39403695 | G   | A | --     | --    | Intron          | SNP | 0.390 | 25 | 16 |
| KIF6        | chr6 | 39536427 | A   | T | --     | --    | Intron          | SNP | 0.200 | 32 | 8  |
| --          | chr6 | 40127840 | G   | T | --     | --    | IGR             | SNP | 0.156 | 27 | 5  |
| FLJ41649    | chr6 | 40313027 | T   | A | --     | --    | RNA             | SNP | 0.125 | 28 | 4  |
| --          | chr6 | 40690513 | A   | C | --     | --    | IGR             | SNP | 0.146 | 35 | 6  |
| --          | chr6 | 40967139 | C   | A | --     | --    | IGR             | SNP | 0.125 | 21 | 3  |
| NCR2        | chr6 | 41307549 | G   | C | --     | --    | Intron          | SNP | 0.170 | 44 | 9  |
| TFEB        | chr6 | 41692103 | C   | T | --     | --    | Intron          | SNP | 0.237 | 45 | 14 |
| PRICKLE4    | chr6 | 41748848 | C   | T | --     | --    | Intron          | SNP | 0.609 | 18 | 28 |
| TRERF1      | chr6 | 42397661 | G   | A | --     | --    | Intron          | SNP | 0.682 | 14 | 30 |
| --          | chr6 | 42513726 | G   | A | --     | --    | IGR             | SNP | 0.150 | 51 | 9  |
| UBR2        | chr6 | 42635350 | G   | T | --     | --    | Intron          | SNP | 0.286 | 10 | 4  |
| CNPY3       | chr6 | 42899224 | C   | T | --     | --    | Intron          | SNP | 0.263 | 28 | 10 |
| --          | chr6 | 43285407 | C   | G | --     | --    | IGR             | SNP | 0.196 | 41 | 10 |
| MRPS18A     | chr6 | 43654649 | C   | A | --     | --    | Intron          | SNP | 0.310 | 40 | 18 |
| --          | chr6 | 43731109 | G   | A | --     | --    | IGR             | SNP | 0.571 | 15 | 20 |
| --          | chr6 | 44042127 | G   | T | --     | --    | IGR             | SNP | 0.253 | 56 | 19 |
| SUPT3H      | chr6 | 44846203 | T   | A | --     | --    | Intron          | SNP | 0.239 | 35 | 11 |
| SUPT3H      | chr6 | 44875189 | G   | A | --     | --    | Intron          | SNP | 0.176 | 28 | 6  |
| SUPT3H      | chr6 | 45181867 | C   | G | --     | --    | Intron          | SNP | 0.250 | 33 | 11 |
| RUNX2       | chr6 | 45453435 | GTA | - | --     | --    | Intron          | DEL | 0.125 | 21 | 3  |
| --          | chr6 | 46311269 | C   | T | --     | --    | IGR             | SNP | 0.532 | 22 | 25 |
| --          | chr6 | 47041636 | G   | C | --     | --    | IGR             | SNP | 0.674 | 15 | 31 |
| CD2AP       | chr6 | 47529240 | G   | C | --     | --    | Intron          | SNP | 0.773 | 10 | 34 |
| CD2AP       | chr6 | 47561941 | G   | A | --     | --    | Intron          | SNP | 0.270 | 27 | 10 |
| C6orf138    | chr6 | 47932298 | A   | T | --     | --    | Intron          | SNP | 0.364 | 28 | 16 |
| C6orf138    | chr6 | 47989683 | G   | T | --     | --    | Intron          | SNP | 0.241 | 22 | 7  |
| --          | chr6 | 48149377 | A   | C | --     | --    | IGR             | SNP | 0.256 | 32 | 11 |
| --          | chr6 | 48235286 | C   | A | --     | --    | IGR             | SNP | 0.125 | 28 | 4  |
| --          | chr6 | 48332095 | A   | G | --     | --    | IGR             | SNP | 0.267 | 11 | 4  |
| --          | chr6 | 48504172 | T   | C | --     | --    | IGR             | SNP | 0.333 | 28 | 14 |
| --          | chr6 | 48610713 | G   | T | --     | --    | IGR             | SNP | 0.192 | 21 | 5  |

|                |      |          |      |       |      |      |                 |     |       |    |    |
|----------------|------|----------|------|-------|------|------|-----------------|-----|-------|----|----|
| --             | chr6 | 48689987 | C    | A     | --   | --   | IGR             | SNP | 0.417 | 7  | 5  |
| --             | chr6 | 48699698 | C    | T     | --   | --   | IGR             | SNP | 0.308 | 9  | 4  |
| --             | chr6 | 48700268 | G    | A     | --   | --   | IGR             | SNP | 0.513 | 19 | 20 |
| --             | chr6 | 48739227 | G    | T     | --   | --   | IGR             | SNP | 0.243 | 28 | 9  |
| --             | chr6 | 48836513 | T    | A     | --   | --   | IGR             | SNP | 0.255 | 38 | 13 |
| --             | chr6 | 48909332 | G    | C     | --   | --   | IGR             | SNP | 0.541 | 17 | 20 |
| --             | chr6 | 49266027 | C    | A     | --   | --   | IGR             | SNP | 0.352 | 35 | 19 |
| <i>CRISP2</i>  | chr6 | 49668495 | A    | C     | T69G | D23E | Missense_mutati | SNP | 0.471 | 18 | 16 |
| --             | chr6 | 50243402 | -    | ATGAG | --   | --   | IGR             | INS | 0.130 | 20 | 3  |
| --             | chr6 | 50675943 | G    | A     | --   | --   | IGR             | SNP | 0.143 | 18 | 3  |
| --             | chr6 | 50916434 | G    | A     | --   | --   | IGR             | SNP | 0.163 | 36 | 7  |
| --             | chr6 | 51077356 | G    | T     | --   | --   | IGR             | SNP | 0.148 | 23 | 4  |
| --             | chr6 | 51117401 | T    | A     | --   | --   | IGR             | SNP | 0.222 | 28 | 8  |
| --             | chr6 | 51207256 | T    | G     | --   | --   | IGR             | SNP | 0.298 | 33 | 14 |
| --             | chr6 | 51207257 | A    | C     | --   | --   | IGR             | SNP | 0.298 | 33 | 14 |
| <i>PKHD1</i>   | chr6 | 51693315 | A    | G     | --   | --   | Intron          | SNP | 0.154 | 33 | 6  |
| <i>PKHD1</i>   | chr6 | 51835077 | A    | G     | --   | --   | Intron          | SNP | 0.189 | 43 | 10 |
| <i>IL17A</i>   | chr6 | 52052929 | T    | A     | --   | --   | Intron          | SNP | 0.357 | 18 | 10 |
| <i>EFHC1</i>   | chr6 | 52336211 | A    | G     | --   | --   | Intron          | SNP | 0.500 | 15 | 15 |
| --             | chr6 | 52721620 | A    | C     | --   | --   | IGR             | SNP | 0.229 | 37 | 11 |
| <i>GCM1</i>    | chr6 | 52994070 | TC   | -     | --   | --   | Intron          | DEL | 0.161 | 26 | 5  |
| --             | chr6 | 53091620 | A    | T     | --   | --   | IGR             | SNP | 0.440 | 14 | 11 |
| --             | chr6 | 53338685 | G    | C     | --   | --   | IGR             | SNP | 0.213 | 37 | 10 |
| --             | chr6 | 53344280 | G    | T     | --   | --   | IGR             | SNP | 0.429 | 20 | 15 |
| <i>MLIP</i>    | chr6 | 54020456 | C    | G     | --   | --   | Intron          | SNP | 0.300 | 21 | 9  |
| --             | chr6 | 54163334 | C    | T     | --   | --   | IGR             | SNP | 0.250 | 9  | 3  |
| --             | chr6 | 54163336 | A    | G     | --   | --   | IGR             | SNP | 0.250 | 9  | 3  |
| --             | chr6 | 54342261 | A    | T     | --   | --   | IGR             | SNP | 0.658 | 13 | 25 |
| --             | chr6 | 54449723 | T    | C     | --   | --   | IGR             | SNP | 0.385 | 24 | 15 |
| --             | chr6 | 54611646 | C    | A     | --   | --   | IGR             | SNP | 0.188 | 26 | 6  |
| --             | chr6 | 54611647 | A    | C     | --   | --   | IGR             | SNP | 0.188 | 26 | 6  |
| --             | chr6 | 55173248 | C    | T     | --   | --   | IGR             | SNP | 0.265 | 25 | 9  |
| <i>GFRAL</i>   | chr6 | 55212986 | T    | C     | --   | --   | Intron          | SNP | 0.323 | 21 | 10 |
| <i>COL21A1</i> | chr6 | 55998570 | A    | T     | --   | --   | Intron          | SNP | 0.127 | 48 | 7  |
| --             | chr6 | 56124810 | C    | G     | --   | --   | IGR             | SNP | 0.250 | 39 | 13 |
| <i>DST</i>     | chr6 | 56399650 | A    | T     | --   | --   | Intron          | SNP | 0.229 | 37 | 11 |
| --             | chr6 | 56740541 | A    | G     | --   | --   | IGR             | SNP | 0.429 | 20 | 15 |
| <i>BEND6</i>   | chr6 | 56882709 | C    | G     | --   | --   | Intron          | SNP | 0.367 | 19 | 11 |
| --             | chr6 | 56893883 | C    | G     | --   | --   | IGR             | SNP | 0.170 | 39 | 8  |
| --             | chr6 | 56946815 | A    | G     | --   | --   | IGR             | SNP | 0.286 | 25 | 10 |
| <i>PRIM2</i>   | chr6 | 57234439 | ATG  | -     | --   | --   | Intron          | DEL | 0.123 | 71 | 10 |
| <i>PRIM2</i>   | chr6 | 57428922 | G    | A     | --   | --   | Intron          | SNP | 0.615 | 15 | 24 |
| <i>PRIM2</i>   | chr6 | 57434124 | T    | G     | --   | --   | Intron          | SNP | 0.263 | 59 | 21 |
| <i>PRIM2</i>   | chr6 | 57448758 | A    | G     | --   | --   | Intron          | SNP | 0.211 | 30 | 8  |
| --             | chr6 | 57574703 | G    | T     | --   | --   | IGR             | SNP | 0.208 | 84 | 22 |
| --             | chr6 | 57606168 | T    | G     | --   | --   | IGR             | SNP | 0.130 | 40 | 6  |
| --             | chr6 | 57737444 | C    | A     | --   | --   | IGR             | SNP | 0.156 | 27 | 5  |
| --             | chr6 | 57843121 | C    | G     | --   | --   | IGR             | SNP | 0.147 | 29 | 5  |
| --             | chr6 | 57843171 | A    | G     | --   | --   | IGR             | SNP | 0.118 | 30 | 4  |
| --             | chr6 | 58063200 | T    | C     | --   | --   | IGR             | SNP | 0.250 | 9  | 3  |
| --             | chr6 | 58063229 | G    | T     | --   | --   | IGR             | SNP | 0.273 | 8  | 3  |
| --             | chr6 | 58143244 | G    | C     | --   | --   | IGR             | SNP | 0.114 | 39 | 5  |
| --             | chr6 | 58143444 | G    | A     | --   | --   | IGR             | SNP | 0.132 | 33 | 5  |
| --             | chr6 | 58243646 | C    | G     | --   | --   | IGR             | SNP | 0.259 | 20 | 7  |
| --             | chr6 | 58638027 | CTTT | -     | --   | --   | IGR             | DEL | 0.143 | 12 | 2  |
| --             | chr6 | 58684189 | G    | A     | --   | --   | IGR             | SNP | 0.429 | 12 | 9  |
| --             | chr6 | 58736328 | G    | A     | --   | --   | IGR             | SNP | 0.559 | 15 | 19 |
| --             | chr6 | 58770986 | T    | A     | --   | --   | IGR             | SNP | 0.778 | 2  | 7  |
| --             | chr6 | 61957459 | C    | T     | --   | --   | IGR             | SNP | 0.108 | 33 | 4  |
| --             | chr6 | 62207975 | A    | C     | --   | --   | IGR             | SNP | 0.351 | 24 | 13 |
| --             | chr6 | 62310591 | C    | G     | --   | --   | IGR             | SNP | 0.257 | 26 | 9  |
| --             | chr6 | 62319682 | C    | T     | --   | --   | IGR             | SNP | 0.543 | 16 | 19 |
| --             | chr6 | 62333380 | C    | G     | --   | --   | IGR             | SNP | 0.286 | 25 | 10 |
| --             | chr6 | 62352580 | AG   | -     | --   | --   | IGR             | DEL | 0.125 | 14 | 2  |
| <i>KHDRBS2</i> | chr6 | 62445455 | G    | C     | --   | --   | Intron          | SNP | 0.621 | 11 | 18 |
| <i>KHDRBS2</i> | chr6 | 62479217 | G    | T     | --   | --   | Intron          | SNP | 0.400 | 33 | 22 |
| <i>KHDRBS2</i> | chr6 | 62489027 | A    | T     | --   | --   | Intron          | SNP | 0.353 | 22 | 12 |
| <i>KHDRBS2</i> | chr6 | 62552558 | A    | T     | --   | --   | Intron          | SNP | 0.600 | 14 | 21 |
| <i>KHDRBS2</i> | chr6 | 62748047 | A    | C     | --   | --   | Intron          | SNP | 0.371 | 22 | 13 |
| --             | chr6 | 63007830 | A    | C     | --   | --   | IGR             | SNP | 0.529 | 16 | 18 |
| --             | chr6 | 63016181 | A    | C     | --   | --   | IGR             | SNP | 0.516 | 15 | 16 |
| --             | chr6 | 63092656 | G    | A     | --   | --   | IGR             | SNP | 0.286 | 15 | 6  |
| --             | chr6 | 63113825 | G    | T     | --   | --   | IGR             | SNP | 0.630 | 17 | 29 |
| --             | chr6 | 63139041 | T    | C     | --   | --   | IGR             | SNP | 0.517 | 14 | 15 |
| --             | chr6 | 63231474 | G    | A     | --   | --   | IGR             | SNP | 0.200 | 20 | 5  |
| --             | chr6 | 63309231 | C    | T     | --   | --   | IGR             | SNP | 0.441 | 19 | 15 |
| --             | chr6 | 63393332 | C    | A     | --   | --   | IGR             | SNP | 0.310 | 20 | 9  |
| --             | chr6 | 63515397 | C    | A     | --   | --   | IGR             | SNP | 0.295 | 31 | 13 |
| --             | chr6 | 63515601 | A    | G     | --   | --   | IGR             | SNP | 0.286 | 35 | 14 |
| --             | chr6 | 63571320 | G    | A     | --   | --   | IGR             | SNP | 0.105 | 34 | 4  |



|          |      |          |    |        |    |    |         |     |       |    |    |
|----------|------|----------|----|--------|----|----|---------|-----|-------|----|----|
| --       | chr6 | 63868206 | A  | T      | -- | -- | IGR     | SNP | 0.162 | 31 | 6  |
| --       | chr6 | 63976582 | T  | A      | -- | -- | IGR     | SNP | 0.333 | 20 | 10 |
| --       | chr6 | 64152931 | C  | T      | -- | -- | IGR     | SNP | 0.250 | 36 | 12 |
| EYS      | chr6 | 64616226 | G  | C      | -- | -- | Intron  | SNP | 0.108 | 33 | 4  |
| EYS      | chr6 | 65142822 | A  | G      | -- | -- | Intron  | SNP | 0.239 | 35 | 11 |
| EYS      | chr6 | 65160070 | A  | G      | -- | -- | Intron  | SNP | 0.143 | 18 | 3  |
| EYS      | chr6 | 65258393 | A  | C      | -- | -- | Intron  | SNP | 0.283 | 33 | 13 |
| EYS      | chr6 | 65272193 | CA | -      | -- | -- | Intron  | DEL | 0.241 | 22 | 7  |
| EYS      | chr6 | 65361173 | A  | C      | -- | -- | Intron  | SNP | 0.300 | 28 | 12 |
| EYS      | chr6 | 65450410 | A  | T      | -- | -- | Intron  | SNP | 0.429 | 20 | 15 |
| EYS      | chr6 | 66030665 | C  | T      | -- | -- | Intron  | SNP | 0.194 | 25 | 6  |
| EYS      | chr6 | 66102213 | AT | -      | -- | -- | Intron  | DEL | 0.105 | 17 | 2  |
| EYS      | chr6 | 66102439 | G  | A      | -- | -- | Intron  | SNP | 0.281 | 23 | 9  |
| EYS      | chr6 | 66277835 | G  | T      | -- | -- | Intron  | SNP | 0.513 | 19 | 20 |
| EYS      | chr6 | 66400216 | C  | A      | -- | -- | Intron  | SNP | 0.244 | 31 | 10 |
| EYS      | chr6 | 66400221 | C  | A      | -- | -- | Intron  | SNP | 0.263 | 28 | 10 |
| --       | chr6 | 66546556 | T  | C      | -- | -- | IGR     | SNP | 0.103 | 35 | 4  |
| --       | chr6 | 66770411 | T  | A      | -- | -- | IGR     | SNP | 0.333 | 24 | 12 |
| --       | chr6 | 66784222 | A  | G      | -- | -- | IGR     | SNP | 0.357 | 18 | 10 |
| --       | chr6 | 66806395 | T  | C      | -- | -- | IGR     | SNP | 0.108 | 33 | 4  |
| --       | chr6 | 67007872 | C  | A      | -- | -- | IGR     | SNP | 0.167 | 20 | 4  |
| --       | chr6 | 67416834 | A  | C      | -- | -- | IGR     | SNP | 0.185 | 22 | 5  |
| --       | chr6 | 67674655 | G  | A      | -- | -- | IGR     | SNP | 0.577 | 11 | 15 |
| --       | chr6 | 67692040 | C  | A      | -- | -- | IGR     | SNP | 0.759 | 7  | 22 |
| --       | chr6 | 67712110 | T  | A      | -- | -- | IGR     | SNP | 0.459 | 20 | 17 |
| --       | chr6 | 67763235 | G  | A      | -- | -- | IGR     | SNP | 0.545 | 5  | 6  |
| --       | chr6 | 67807773 | C  | T      | -- | -- | IGR     | SNP | 0.200 | 12 | 3  |
| --       | chr6 | 67821596 | A  | C      | -- | -- | IGR     | SNP | 0.138 | 25 | 4  |
| --       | chr6 | 67875074 | G  | T      | -- | -- | IGR     | SNP | 0.160 | 21 | 4  |
| --       | chr6 | 67881793 | G  | A      | -- | -- | IGR     | SNP | 0.684 | 12 | 26 |
| --       | chr6 | 68108356 | C  | A      | -- | -- | IGR     | SNP | 0.286 | 10 | 4  |
| --       | chr6 | 68222079 | G  | A      | -- | -- | IGR     | SNP | 0.500 | 15 | 15 |
| --       | chr6 | 68324642 | G  | T      | -- | -- | IGR     | SNP | 0.303 | 23 | 10 |
| --       | chr6 | 68472970 | A  | G      | -- | -- | IGR     | SNP | 0.340 | 31 | 16 |
| --       | chr6 | 68474674 | C  | T      | -- | -- | IGR     | SNP | 0.577 | 22 | 30 |
| --       | chr6 | 68542775 | C  | G      | -- | -- | IGR     | SNP | 0.325 | 27 | 13 |
| --       | chr6 | 68889652 | A  | T      | -- | -- | IGR     | SNP | 0.357 | 9  | 5  |
| BAI3     | chr6 | 69386304 | G  | A      | -- | -- | Intron  | SNP | 0.267 | 11 | 4  |
| BAI3     | chr6 | 69459227 | G  | A      | -- | -- | Intron  | SNP | 0.379 | 18 | 11 |
| BAI3     | chr6 | 69523719 | A  | C      | -- | -- | Intron  | SNP | 0.136 | 19 | 3  |
| BAI3     | chr6 | 69523754 | T  | C      | -- | -- | Intron  | SNP | 0.231 | 10 | 3  |
| BAI3     | chr6 | 69544539 | T  | G      | -- | -- | Intron  | SNP | 0.250 | 24 | 8  |
| BAI3     | chr6 | 69556230 | T  | G      | -- | -- | Intron  | SNP | 0.188 | 26 | 6  |
| BAI3     | chr6 | 69765928 | G  | A      | -- | -- | Intron  | SNP | 0.323 | 21 | 10 |
| BAI3     | chr6 | 70088238 | G  | C      | -- | -- | Intron  | SNP | 0.478 | 24 | 22 |
| --       | chr6 | 70196056 | -  | GGGAA  | -- | -- | IGR     | INS | 0.105 | 17 | 2  |
| LMBRD1   | chr6 | 70470166 | C  | T      | -- | -- | Intron  | SNP | 0.280 | 36 | 14 |
| FAM135A  | chr6 | 71148411 | T  | C      | -- | -- | Intron  | SNP | 0.396 | 29 | 19 |
| SMAP1    | chr6 | 71405195 | AG | -      | -- | -- | Intron  | DEL | 0.286 | 30 | 12 |
| SMAP1    | chr6 | 71497322 | C  | T      | -- | -- | Intron  | SNP | 0.400 | 9  | 6  |
| B3GAT2   | chr6 | 71595901 | A  | T      | -- | -- | Intron  | SNP | 0.640 | 18 | 32 |
| B3GAT2   | chr6 | 71653302 | A  | C      | -- | -- | Intron  | SNP | 0.389 | 22 | 14 |
| --       | chr6 | 71830453 | C  | A      | -- | -- | IGR     | SNP | 0.417 | 14 | 10 |
| OGFRL1   | chr6 | 72004964 | A  | G      | -- | -- | Intron  | SNP | 0.488 | 21 | 20 |
| --       | chr6 | 72208373 | C  | T      | -- | -- | IGR     | SNP | 0.250 | 27 | 9  |
| --       | chr6 | 72346000 | A  | T      | -- | -- | IGR     | SNP | 0.169 | 54 | 11 |
| --       | chr6 | 72495913 | G  | A      | -- | -- | IGR     | SNP | 0.105 | 34 | 4  |
| RIMS1    | chr6 | 72629715 | A  | T      | -- | -- | Intron  | SNP | 0.389 | 33 | 21 |
| RIMS1    | chr6 | 72660926 | G  | T      | -- | -- | Intron  | SNP | 0.525 | 19 | 21 |
| RIMS1    | chr6 | 72716714 | C  | T      | -- | -- | Intron  | SNP | 0.615 | 15 | 24 |
| RIMS1    | chr6 | 72720163 | A  | G      | -- | -- | Intron  | SNP | 0.111 | 32 | 4  |
| RIMS1    | chr6 | 72720364 | -  | TCA    | -- | -- | Intron  | INS | 0.138 | 25 | 4  |
| RIMS1    | chr6 | 72968164 | T  | C      | -- | -- | Intron  | SNP | 0.212 | 26 | 7  |
| KCNQ5    | chr6 | 73379140 | G  | A      | -- | -- | Intron  | SNP | 0.326 | 31 | 15 |
| KCNQ5    | chr6 | 73406510 | A  | G      | -- | -- | Intron  | SNP | 0.294 | 24 | 10 |
| KCNQ5    | chr6 | 73532689 | C  | A      | -- | -- | Intron  | SNP | 0.275 | 37 | 14 |
| KCNQ5    | chr6 | 73691367 | G  | A      | -- | -- | Intron  | SNP | 0.429 | 8  | 6  |
| KCNQ5    | chr6 | 73704178 | G  | A      | -- | -- | Intron  | SNP | 0.154 | 22 | 4  |
| KCNQ5    | chr6 | 73768070 | A  | T      | -- | -- | Intron  | SNP | 0.231 | 20 | 6  |
| C6orf147 | chr6 | 74020909 | -  | GGT    | -- | -- | 5'Flank | INS | 0.133 | 13 | 2  |
| --       | chr6 | 74241630 | T  | A      | -- | -- | IGR     | SNP | 0.237 | 29 | 9  |
| --       | chr6 | 74280949 | -  | CTCCTG | -- | -- | IGR     | INS | 0.571 | 23 | 32 |
| --       | chr6 | 74400743 | T  | C      | -- | -- | IGR     | SNP | 0.158 | 32 | 6  |
| CD109    | chr6 | 74464818 | A  | G      | -- | -- | Intron  | SNP | 0.119 | 37 | 5  |
| --       | chr6 | 74586708 | G  | T      | -- | -- | IGR     | SNP | 0.350 | 26 | 14 |
| --       | chr6 | 74605196 | A  | G      | -- | -- | IGR     | SNP | 0.333 | 18 | 9  |
| --       | chr6 | 74635367 | T  | G      | -- | -- | IGR     | SNP | 0.300 | 7  | 3  |
| --       | chr6 | 74743336 | -  | TC     | -- | -- | IGR     | INS | 0.107 | 25 | 3  |
| --       | chr6 | 74743359 | T  | G      | -- | -- | IGR     | SNP | 0.130 | 20 | 3  |
| --       | chr6 | 74793203 | -  | TGG    | -- | -- | IGR     | INS | 0.417 | 14 | 10 |

|                 |      |          |      |       |        |       |                 |     |       |    |    |
|-----------------|------|----------|------|-------|--------|-------|-----------------|-----|-------|----|----|
| --              | chr6 | 74863651 | C    | A     | --     | --    | IGR             | SNP | 0.172 | 24 | 5  |
| --              | chr6 | 74885885 | A    | G     | --     | --    | IGR             | SNP | 0.316 | 26 | 12 |
| --              | chr6 | 75011123 | G    | C     | --     | --    | IGR             | SNP | 0.466 | 31 | 27 |
| --              | chr6 | 75128435 | A    | T     | --     | --    | IGR             | SNP | 0.304 | 16 | 7  |
| --              | chr6 | 75206727 | T    | G     | --     | --    | IGR             | SNP | 0.167 | 15 | 3  |
| --              | chr6 | 75323060 | T    | C     | --     | --    | IGR             | SNP | 0.160 | 21 | 4  |
| --              | chr6 | 75471998 | T    | A     | --     | --    | IGR             | SNP | 0.348 | 15 | 8  |
| --              | chr6 | 75678654 | A    | T     | --     | --    | IGR             | SNP | 0.209 | 34 | 9  |
| <i>FILIP1</i>   | chr6 | 76082400 | AAG  | -     | --     | --    | Intron          | DEL | 0.111 | 32 | 4  |
| <i>FILIP1</i>   | chr6 | 76152094 | G    | A     | --     | --    | Intron          | SNP | 0.227 | 17 | 5  |
| <i>FILIP1</i>   | chr6 | 76171986 | A    | T     | --     | --    | Intron          | SNP | 0.213 | 37 | 10 |
| <i>MYO6</i>     | chr6 | 76600973 | C    | G     | C2896G | Q966E | Missense_mutati | SNP | 0.615 | 10 | 16 |
| <i>IMPG1</i>    | chr6 | 76680061 | T    | A     | --     | --    | Intron          | SNP | 0.394 | 20 | 13 |
| <i>IMPG1</i>    | chr6 | 76683313 | C    | T     | --     | --    | Intron          | SNP | 0.592 | 20 | 29 |
| <i>IMPG1</i>    | chr6 | 76739298 | C    | T     | --     | --    | Intron          | SNP | 0.233 | 33 | 10 |
| <i>IMPG1</i>    | chr6 | 76752932 | AT   | -     | --     | --    | Intron          | DEL | 0.394 | 20 | 13 |
| --              | chr6 | 76846026 | T    | A     | --     | --    | IGR             | SNP | 0.125 | 42 | 6  |
| --              | chr6 | 76885598 | A    | T     | --     | --    | IGR             | SNP | 0.149 | 40 | 7  |
| --              | chr6 | 76910237 | A    | G     | --     | --    | IGR             | SNP | 0.121 | 29 | 4  |
| --              | chr6 | 76910238 | G    | T     | --     | --    | IGR             | SNP | 0.156 | 27 | 5  |
| --              | chr6 | 76981792 | -    | TC    | --     | --    | IGR             | INS | 0.114 | 31 | 4  |
| --              | chr6 | 77011489 | A    | T     | --     | --    | IGR             | SNP | 0.143 | 24 | 4  |
| --              | chr6 | 77171738 | T    | A     | --     | --    | IGR             | SNP | 0.107 | 25 | 3  |
| --              | chr6 | 77336541 | T    | G     | --     | --    | IGR             | SNP | 0.273 | 8  | 3  |
| --              | chr6 | 77608406 | A    | T     | --     | --    | IGR             | SNP | 0.121 | 29 | 4  |
| --              | chr6 | 77658346 | G    | A     | --     | --    | IGR             | SNP | 0.261 | 34 | 12 |
| --              | chr6 | 77665760 | G    | A     | --     | --    | IGR             | SNP | 0.235 | 13 | 4  |
| --              | chr6 | 77963473 | G    | C     | --     | --    | IGR             | SNP | 0.179 | 23 | 5  |
| --              | chr6 | 77963488 | G    | C     | --     | --    | IGR             | SNP | 0.174 | 19 | 4  |
| --              | chr6 | 77992709 | C    | T     | --     | --    | IGR             | SNP | 0.290 | 22 | 9  |
| --              | chr6 | 78037672 | G    | C     | --     | --    | IGR             | SNP | 0.500 | 14 | 14 |
| --              | chr6 | 78086503 | G    | A     | --     | --    | IGR             | SNP | 0.267 | 22 | 8  |
| --              | chr6 | 78163395 | A    | G     | --     | --    | IGR             | SNP | 0.267 | 33 | 12 |
| --              | chr6 | 78306718 | C    | T     | --     | --    | IGR             | SNP | 0.115 | 23 | 3  |
| --              | chr6 | 78312952 | GCA  | -     | --     | --    | IGR             | DEL | 0.188 | 13 | 3  |
| --              | chr6 | 78312967 | GTAT | -     | --     | --    | IGR             | DEL | 0.125 | 21 | 3  |
| --              | chr6 | 78588395 | A    | G     | --     | --    | IGR             | SNP | 0.371 | 22 | 13 |
| --              | chr6 | 78774740 | C    | T     | --     | --    | IGR             | SNP | 0.364 | 21 | 12 |
| --              | chr6 | 78840100 | T    | C     | --     | --    | IGR             | SNP | 0.276 | 21 | 8  |
| --              | chr6 | 79248464 | G    | C     | --     | --    | IGR             | SNP | 0.257 | 26 | 9  |
| --              | chr6 | 79278090 | C    | A     | --     | --    | IGR             | SNP | 0.200 | 16 | 4  |
| --              | chr6 | 79304627 | T    | C     | --     | --    | IGR             | SNP | 0.282 | 28 | 11 |
| --              | chr6 | 79326198 | C    | T     | --     | --    | IGR             | SNP | 0.634 | 15 | 26 |
| --              | chr6 | 79390696 | G    | C     | --     | --    | IGR             | SNP | 0.167 | 15 | 3  |
| --              | chr6 | 79434180 | T    | G     | --     | --    | IGR             | SNP | 0.268 | 30 | 11 |
| --              | chr6 | 79528778 | G    | T     | --     | --    | IGR             | SNP | 0.188 | 13 | 3  |
| <i>PHIP</i>     | chr6 | 79681585 | G    | A     | --     | --    | Intron          | SNP | 0.279 | 31 | 12 |
| --              | chr6 | 80006825 | G    | A     | --     | --    | IGR             | SNP | 0.612 | 19 | 30 |
| --              | chr6 | 80039457 | T    | C     | --     | --    | IGR             | SNP | 0.367 | 19 | 11 |
| --              | chr6 | 80113654 | C    | G     | --     | --    | IGR             | SNP | 0.327 | 35 | 17 |
| --              | chr6 | 80253057 | C    | G     | --     | --    | IGR             | SNP | 0.412 | 20 | 14 |
| <i>SH3BGRL2</i> | chr6 | 80367977 | T    | C     | --     | --    | Intron          | SNP | 0.235 | 39 | 12 |
| --              | chr6 | 80431207 | G    | A     | --     | --    | IGR             | SNP | 0.548 | 14 | 17 |
| --              | chr6 | 80462622 | C    | G     | --     | --    | IGR             | SNP | 0.242 | 25 | 8  |
| <i>BCKDHB</i>   | chr6 | 81031950 | C    | T     | --     | --    | Intron          | SNP | 0.185 | 22 | 5  |
| --              | chr6 | 81148149 | GT   | -     | --     | --    | IGR             | DEL | 0.545 | 15 | 18 |
| --              | chr6 | 81237147 | C    | G     | --     | --    | IGR             | SNP | 0.333 | 34 | 17 |
| --              | chr6 | 81445557 | A    | G     | --     | --    | IGR             | SNP | 0.273 | 32 | 12 |
| --              | chr6 | 81494805 | G    | A     | --     | --    | IGR             | SNP | 0.656 | 11 | 21 |
| --              | chr6 | 81505770 | -    | AC    | --     | --    | IGR             | INS | 0.133 | 13 | 2  |
| --              | chr6 | 81569006 | C    | A     | --     | --    | IGR             | SNP | 0.200 | 16 | 4  |
| --              | chr6 | 81724393 | G    | A     | --     | --    | IGR             | SNP | 0.214 | 11 | 3  |
| --              | chr6 | 81821823 | C    | T     | --     | --    | IGR             | SNP | 0.650 | 7  | 13 |
| --              | chr6 | 81853899 | A    | G     | --     | --    | IGR             | SNP | 0.410 | 23 | 16 |
| --              | chr6 | 81971399 | A    | G     | --     | --    | IGR             | SNP | 0.471 | 9  | 8  |
| --              | chr6 | 81982779 | T    | G     | --     | --    | IGR             | SNP | 0.545 | 5  | 6  |
| --              | chr6 | 82289714 | -    | TA    | --     | --    | IGR             | INS | 0.105 | 17 | 2  |
| --              | chr6 | 82565947 | T    | G     | --     | --    | IGR             | SNP | 0.256 | 29 | 10 |
| <i>IBTK</i>     | chr6 | 82907106 | G    | T     | --     | --    | Intron          | SNP | 0.211 | 15 | 4  |
| --              | chr6 | 83068394 | C    | T     | --     | --    | IGR             | SNP | 0.277 | 34 | 13 |
| --              | chr6 | 83161936 | T    | C     | --     | --    | IGR             | SNP | 0.283 | 33 | 13 |
| --              | chr6 | 83212206 | C    | A     | --     | --    | IGR             | SNP | 0.118 | 30 | 4  |
| --              | chr6 | 83268948 | -    | CAGAA | --     | --    | IGR             | INS | 0.111 | 16 | 2  |
| --              | chr6 | 83274983 | T    | C     | --     | --    | IGR             | SNP | 0.162 | 31 | 6  |
| <i>UBE2CBP</i>  | chr6 | 83654529 | C    | T     | --     | --    | Intron          | SNP | 0.745 | 13 | 38 |
| --              | chr6 | 83916436 | C    | A     | --     | --    | IGR             | SNP | 0.314 | 24 | 11 |
| <i>ME1</i>      | chr6 | 83949227 | G    | T     | --     | --    | Intron          | SNP | 0.588 | 21 | 30 |
| <i>ME1</i>      | chr6 | 83989973 | T    | A     | --     | --    | Intron          | SNP | 0.481 | 14 | 13 |
| <i>ME1</i>      | chr6 | 84054488 | G    | A     | --     | --    | Intron          | SNP | 0.217 | 18 | 5  |
| --              | chr6 | 84425842 | G    | C     | --     | --    | IGR             | SNP | 0.600 | 12 | 18 |

|                 |      |          |     |     |    |    |         |     |       |    |    |
|-----------------|------|----------|-----|-----|----|----|---------|-----|-------|----|----|
| --              | chr6 | 84451393 | T   | C   | -- | -- | IGR     | SNP | 0.655 | 10 | 19 |
| --              | chr6 | 84558143 | G   | A   | -- | -- | IGR     | SNP | 0.346 | 17 | 9  |
| <i>CYB5R4</i>   | chr6 | 84580162 | G   | A   | -- | -- | Intron  | SNP | 0.560 | 11 | 14 |
| --              | chr6 | 84681849 | G   | A   | -- | -- | IGR     | SNP | 0.435 | 13 | 10 |
| --              | chr6 | 85121888 | G   | C   | -- | -- | IGR     | SNP | 0.625 | 15 | 25 |
| --              | chr6 | 85705943 | T   | C   | -- | -- | IGR     | SNP | 0.649 | 13 | 24 |
| --              | chr6 | 85823687 | G   | A   | -- | -- | IGR     | SNP | 0.256 | 29 | 10 |
| --              | chr6 | 85914065 | G   | A   | -- | -- | IGR     | SNP | 0.344 | 21 | 11 |
| --              | chr6 | 85991347 | TTA | -   | -- | -- | IGR     | DEL | 0.111 | 16 | 2  |
| <i>SNX14</i>    | chr6 | 86224792 | G   | T   | -- | -- | Intron  | SNP | 0.174 | 19 | 4  |
| <i>SNHG5</i>    | chr6 | 86387232 | A   | C   | -- | -- | RNA     | SNP | 0.396 | 29 | 19 |
| --              | chr6 | 86487555 | TTC | -   | -- | -- | IGR     | DEL | 0.233 | 23 | 7  |
| --              | chr6 | 86507661 | G   | T   | -- | -- | IGR     | SNP | 0.229 | 27 | 8  |
| --              | chr6 | 86689670 | A   | G   | -- | -- | IGR     | SNP | 0.368 | 12 | 7  |
| --              | chr6 | 86814011 | A   | C   | -- | -- | IGR     | SNP | 0.273 | 24 | 9  |
| --              | chr6 | 86949106 | C   | A   | -- | -- | IGR     | SNP | 0.400 | 15 | 10 |
| --              | chr6 | 87001340 | G   | A   | -- | -- | IGR     | SNP | 0.200 | 24 | 6  |
| --              | chr6 | 87072430 | A   | G   | -- | -- | IGR     | SNP | 0.588 | 21 | 30 |
| --              | chr6 | 87343225 | C   | A   | -- | -- | IGR     | SNP | 0.232 | 43 | 13 |
| --              | chr6 | 87577632 | A   | C   | -- | -- | IGR     | SNP | 0.481 | 27 | 25 |
| --              | chr6 | 87625654 | C   | G   | -- | -- | IGR     | SNP | 0.282 | 28 | 11 |
| --              | chr6 | 87630137 | T   | A   | -- | -- | IGR     | SNP | 0.452 | 17 | 14 |
| <i>ZNF292</i>   | chr6 | 87869609 | C   | T   | -- | -- | Intron  | SNP | 0.308 | 27 | 12 |
| <i>ZNF292</i>   | chr6 | 87905765 | G   | A   | -- | -- | Intron  | SNP | 0.190 | 17 | 4  |
| --              | chr6 | 87982236 | G   | C   | -- | -- | IGR     | SNP | 0.577 | 22 | 30 |
| <i>GJB7</i>     | chr6 | 88015068 | G   | A   | -- | -- | Intron  | SNP | 0.125 | 28 | 4  |
| <i>C6orf165</i> | chr6 | 88132958 | TA  | -   | -- | -- | Intron  | DEL | 0.133 | 13 | 2  |
| <i>ORC3</i>     | chr6 | 88312631 | T   | A   | -- | -- | Intron  | SNP | 0.667 | 1  | 2  |
| <i>ORC3</i>     | chr6 | 88312632 | A   | T   | -- | -- | Intron  | SNP | 0.667 | 1  | 2  |
| --              | chr6 | 88478152 | A   | G   | -- | -- | IGR     | SNP | 0.208 | 19 | 5  |
| --              | chr6 | 88485211 | C   | T   | -- | -- | IGR     | SNP | 0.190 | 17 | 4  |
| --              | chr6 | 88706873 | G   | A   | -- | -- | IGR     | SNP | 0.333 | 38 | 19 |
| --              | chr6 | 88930060 | A   | T   | -- | -- | IGR     | SNP | 0.315 | 37 | 17 |
| --              | chr6 | 88968644 | A   | G   | -- | -- | IGR     | SNP | 0.591 | 9  | 13 |
| --              | chr6 | 89214438 | C   | T   | -- | -- | IGR     | SNP | 0.348 | 15 | 8  |
| --              | chr6 | 89260915 | G   | A   | -- | -- | IGR     | SNP | 0.458 | 26 | 22 |
| --              | chr6 | 89701775 | GA  | -   | -- | -- | IGR     | DEL | 0.250 | 15 | 5  |
| --              | chr6 | 89755687 | C   | T   | -- | -- | IGR     | SNP | 0.235 | 13 | 4  |
| <i>ANKRD6</i>   | chr6 | 90265025 | TA  | -   | -- | -- | Intron  | DEL | 0.105 | 17 | 2  |
| --              | chr6 | 90535481 | C   | A   | -- | -- | IGR     | SNP | 0.235 | 26 | 8  |
| <i>CASP8AP2</i> | chr6 | 90550995 | A   | G   | -- | -- | Intron  | SNP | 0.571 | 18 | 24 |
| <i>BACH2</i>    | chr6 | 90738787 | C   | T   | -- | -- | Intron  | SNP | 0.625 | 18 | 30 |
| <i>BACH2</i>    | chr6 | 90878838 | G   | C   | -- | -- | Intron  | SNP | 0.355 | 20 | 11 |
| --              | chr6 | 91099582 | C   | G   | -- | -- | IGR     | SNP | 0.250 | 21 | 7  |
| --              | chr6 | 91150836 | G   | T   | -- | -- | IGR     | SNP | 0.212 | 26 | 7  |
| <i>MAP3K7</i>   | chr6 | 91224788 | G   | T   | -- | -- | 3'Flank | SNP | 0.267 | 33 | 12 |
| --              | chr6 | 91338174 | C   | A   | -- | -- | IGR     | SNP | 0.444 | 20 | 16 |
| --              | chr6 | 91382514 | A   | C   | -- | -- | IGR     | SNP | 0.273 | 24 | 9  |
| --              | chr6 | 91742836 | A   | G   | -- | -- | IGR     | SNP | 0.239 | 35 | 11 |
| --              | chr6 | 91755594 | -   | CA  | -- | -- | IGR     | INS | 0.125 | 14 | 2  |
| --              | chr6 | 91845994 | C   | T   | -- | -- | IGR     | SNP | 0.273 | 32 | 12 |
| --              | chr6 | 91880936 | G   | T   | -- | -- | IGR     | SNP | 0.190 | 17 | 4  |
| --              | chr6 | 91941115 | C   | T   | -- | -- | IGR     | SNP | 0.617 | 18 | 29 |
| --              | chr6 | 92146484 | G   | A   | -- | -- | IGR     | SNP | 0.120 | 22 | 3  |
| --              | chr6 | 92259703 | A   | G   | -- | -- | IGR     | SNP | 0.676 | 12 | 25 |
| --              | chr6 | 92322242 | C   | T   | -- | -- | IGR     | SNP | 0.310 | 29 | 13 |
| --              | chr6 | 92422955 | C   | T   | -- | -- | IGR     | SNP | 0.647 | 12 | 22 |
| --              | chr6 | 92673188 | T   | A   | -- | -- | IGR     | SNP | 0.385 | 24 | 15 |
| --              | chr6 | 92966582 | G   | C   | -- | -- | IGR     | SNP | 0.719 | 9  | 23 |
| --              | chr6 | 93174228 | T   | A   | -- | -- | IGR     | SNP | 0.244 | 34 | 11 |
| --              | chr6 | 93618850 | A   | G   | -- | -- | IGR     | SNP | 0.667 | 18 | 36 |
| --              | chr6 | 93882246 | G   | A   | -- | -- | IGR     | SNP | 0.400 | 24 | 16 |
| <i>EPHA7</i>    | chr6 | 94014445 | C   | A   | -- | -- | Intron  | SNP | 0.188 | 39 | 9  |
| --              | chr6 | 94168444 | A   | G   | -- | -- | IGR     | SNP | 0.238 | 16 | 5  |
| --              | chr6 | 94270112 | C   | G   | -- | -- | IGR     | SNP | 0.273 | 32 | 12 |
| --              | chr6 | 94288825 | TAC | -   | -- | -- | IGR     | DEL | 0.120 | 22 | 3  |
| --              | chr6 | 94542369 | G   | A   | -- | -- | IGR     | SNP | 0.167 | 15 | 3  |
| --              | chr6 | 94738703 | C   | T   | -- | -- | IGR     | SNP | 0.149 | 40 | 7  |
| --              | chr6 | 94807448 | C   | A   | -- | -- | IGR     | SNP | 0.133 | 26 | 4  |
| --              | chr6 | 94911880 | G   | A   | -- | -- | IGR     | SNP | 0.125 | 21 | 3  |
| --              | chr6 | 95189574 | -   | CAT | -- | -- | IGR     | INS | 0.346 | 17 | 9  |
| --              | chr6 | 95396016 | G   | C   | -- | -- | IGR     | SNP | 0.435 | 13 | 10 |
| --              | chr6 | 95405932 | A   | T   | -- | -- | IGR     | SNP | 0.206 | 27 | 7  |
| --              | chr6 | 95660774 | T   | C   | -- | -- | IGR     | SNP | 0.771 | 8  | 27 |
| --              | chr6 | 95665161 | C   | G   | -- | -- | IGR     | SNP | 0.531 | 15 | 17 |
| --              | chr6 | 96298065 | C   | T   | -- | -- | IGR     | SNP | 0.231 | 20 | 6  |
| --              | chr6 | 96300268 | T   | G   | -- | -- | IGR     | SNP | 0.143 | 24 | 4  |
| --              | chr6 | 96301474 | G   | C   | -- | -- | IGR     | SNP | 0.391 | 28 | 18 |
| --              | chr6 | 96325570 | G   | C   | -- | -- | IGR     | SNP | 0.386 | 27 | 17 |
| <i>FUT9</i>     | chr6 | 96640213 | -   | TA  | -- | -- | Intron  | INS | 0.125 | 28 | 4  |

|                 |      |           |      |          |    |    |        |     |       |    |    |
|-----------------|------|-----------|------|----------|----|----|--------|-----|-------|----|----|
| --              | chr6 | 96836401  | C    | G        | -- | -- | IGR    | SNP | 0.400 | 18 | 12 |
| --              | chr6 | 96837249  | C    | A        | -- | -- | IGR    | SNP | 0.340 | 33 | 17 |
| <i>FHL5</i>     | chr6 | 97022863  | G    | A        | -- | -- | Intron | SNP | 0.364 | 14 | 8  |
| <i>FHL5</i>     | chr6 | 97039569  | T    | C        | -- | -- | Intron | SNP | 0.273 | 24 | 9  |
| <i>NDUFAF4</i>  | chr6 | 97345430  | G    | A        | -- | -- | Intron | SNP | 0.389 | 22 | 14 |
| <i>KLHL32</i>   | chr6 | 97443375  | C    | A        | -- | -- | Intron | SNP | 0.356 | 29 | 16 |
| <i>KLHL32</i>   | chr6 | 97532615  | C    | T        | -- | -- | Intron | SNP | 0.395 | 23 | 15 |
| --              | chr6 | 98130261  | T    | A        | -- | -- | IGR    | SNP | 0.120 | 22 | 3  |
| --              | chr6 | 98178556  | G    | T        | -- | -- | IGR    | SNP | 0.279 | 31 | 12 |
| --              | chr6 | 98285361  | C    | A        | -- | -- | IGR    | SNP | 0.279 | 31 | 12 |
| --              | chr6 | 98677787  | G    | T        | -- | -- | IGR    | SNP | 0.378 | 23 | 14 |
| --              | chr6 | 99056400  | G    | A        | -- | -- | IGR    | SNP | 0.259 | 20 | 7  |
| --              | chr6 | 99265928  | G    | T        | -- | -- | IGR    | SNP | 0.469 | 17 | 15 |
| --              | chr6 | 99524373  | G    | T        | -- | -- | IGR    | SNP | 0.250 | 48 | 16 |
| --              | chr6 | 99574983  | C    | A        | -- | -- | IGR    | SNP | 0.200 | 32 | 8  |
| --              | chr6 | 100170521 | A    | G        | -- | -- | IGR    | SNP | 0.508 | 29 | 30 |
| <i>MCHR2</i>    | chr6 | 100378399 | A    | G        | -- | -- | Intron | SNP | 0.176 | 14 | 3  |
| <i>MCHR2</i>    | chr6 | 100378444 | -    | TC       | -- | -- | Intron | INS | 0.103 | 26 | 3  |
| <i>MCHR2</i>    | chr6 | 100410771 | G    | T        | -- | -- | Intron | SNP | 0.533 | 21 | 24 |
| <i>MCHR2</i>    | chr6 | 100438792 | CA   | -        | -- | -- | Intron | DEL | 0.114 | 31 | 4  |
| --              | chr6 | 100729981 | A    | G        | -- | -- | IGR    | SNP | 0.581 | 18 | 25 |
| <i>ASCC3</i>    | chr6 | 101031633 | G    | A        | -- | -- | Intron | SNP | 0.200 | 16 | 4  |
| <i>ASCC3</i>    | chr6 | 101031635 | A    | T        | -- | -- | Intron | SNP | 0.200 | 16 | 4  |
| <i>ASCC3</i>    | chr6 | 101111157 | A    | T        | -- | -- | Intron | SNP | 0.345 | 38 | 20 |
| <i>ASCC3</i>    | chr6 | 101187705 | C    | T        | -- | -- | Intron | SNP | 0.161 | 26 | 5  |
| --              | chr6 | 101350127 | A    | T        | -- | -- | IGR    | SNP | 0.364 | 35 | 20 |
| --              | chr6 | 101602586 | T    | G        | -- | -- | IGR    | SNP | 0.400 | 3  | 2  |
| --              | chr6 | 101621025 | A    | C        | -- | -- | IGR    | SNP | 0.278 | 26 | 10 |
| --              | chr6 | 101653044 | T    | A        | -- | -- | IGR    | SNP | 0.667 | 11 | 22 |
| --              | chr6 | 101835054 | T    | A        | -- | -- | IGR    | SNP | 0.717 | 13 | 33 |
| <i>GRIK2</i>    | chr6 | 101963704 | A    | T        | -- | -- | Intron | SNP | 0.244 | 31 | 10 |
| <i>GRIK2</i>    | chr6 | 102028888 | AT   | -        | -- | -- | Intron | DEL | 0.194 | 29 | 7  |
| <i>GRIK2</i>    | chr6 | 102309113 | A    | T        | -- | -- | Intron | SNP | 0.378 | 28 | 17 |
| <i>GRIK2</i>    | chr6 | 102337301 | TAGA | -        | -- | -- | Intron | DEL | 0.591 | 9  | 13 |
| <i>GRIK2</i>    | chr6 | 102422210 | C    | T        | -- | -- | Intron | SNP | 0.439 | 32 | 25 |
| --              | chr6 | 102692702 | C    | A        | -- | -- | IGR    | SNP | 0.333 | 22 | 11 |
| --              | chr6 | 102741311 | T    | C        | -- | -- | IGR    | SNP | 0.320 | 17 | 8  |
| --              | chr6 | 102805444 | -    | AG       | -- | -- | IGR    | INS | 0.128 | 34 | 5  |
| --              | chr6 | 102814912 | C    | G        | -- | -- | IGR    | SNP | 0.395 | 23 | 15 |
| --              | chr6 | 103147031 | C    | A        | -- | -- | IGR    | SNP | 0.325 | 27 | 13 |
| --              | chr6 | 103220856 | C    | T        | -- | -- | IGR    | SNP | 0.649 | 13 | 24 |
| --              | chr6 | 103273596 | C    | A        | -- | -- | IGR    | SNP | 0.167 | 15 | 3  |
| --              | chr6 | 103360617 | G    | T        | -- | -- | IGR    | SNP | 0.646 | 17 | 31 |
| --              | chr6 | 103362111 | G    | T        | -- | -- | IGR    | SNP | 0.647 | 12 | 22 |
| --              | chr6 | 103585432 | C    | A        | -- | -- | IGR    | SNP | 0.244 | 34 | 11 |
| --              | chr6 | 103680197 | G    | T        | -- | -- | IGR    | SNP | 0.150 | 17 | 3  |
| --              | chr6 | 103687985 | G    | C        | -- | -- | IGR    | SNP | 0.586 | 12 | 17 |
| --              | chr6 | 103699450 | G    | T        | -- | -- | IGR    | SNP | 0.583 | 5  | 7  |
| --              | chr6 | 103744352 | TGA  | -        | -- | -- | IGR    | DEL | 0.120 | 22 | 3  |
| --              | chr6 | 103796633 | C    | A        | -- | -- | IGR    | SNP | 0.375 | 20 | 12 |
| --              | chr6 | 103964043 | G    | A        | -- | -- | IGR    | SNP | 0.135 | 32 | 5  |
| --              | chr6 | 104432782 | T    | C        | -- | -- | IGR    | SNP | 0.500 | 14 | 14 |
| --              | chr6 | 104438143 | A    | G        | -- | -- | IGR    | SNP | 0.208 | 38 | 10 |
| --              | chr6 | 104447591 | G    | A        | -- | -- | IGR    | SNP | 0.377 | 33 | 20 |
| --              | chr6 | 104621951 | G    | T        | -- | -- | IGR    | SNP | 0.378 | 28 | 17 |
| --              | chr6 | 104630799 | A    | T        | -- | -- | IGR    | SNP | 0.652 | 16 | 30 |
| --              | chr6 | 104850255 | G    | A        | -- | -- | IGR    | SNP | 0.500 | 20 | 20 |
| <i>HACE1</i>    | chr6 | 105185891 | -    | CCCTGACT | -- | -- | Intron | INS | 0.130 | 20 | 3  |
| <i>HACE1</i>    | chr6 | 105260010 | T    | A        | -- | -- | Intron | SNP | 0.281 | 23 | 9  |
| <i>LIN28B</i>   | chr6 | 105458491 | C    | T        | -- | -- | Intron | SNP | 0.459 | 20 | 17 |
| --              | chr6 | 105533998 | G    | C        | -- | -- | IGR    | SNP | 0.533 | 21 | 24 |
| <i>C6orf112</i> | chr6 | 105586606 | C    | T        | -- | -- | RNA    | SNP | 0.317 | 28 | 13 |
| --              | chr6 | 106081262 | C    | A        | -- | -- | IGR    | SNP | 0.182 | 18 | 4  |
| --              | chr6 | 106200466 | T    | A        | -- | -- | IGR    | SNP | 0.125 | 49 | 7  |
| --              | chr6 | 106256244 | T    | A        | -- | -- | IGR    | SNP | 0.170 | 44 | 9  |
| --              | chr6 | 106631220 | C    | T        | -- | -- | IGR    | SNP | 0.289 | 27 | 11 |
| <i>ATG5</i>     | chr6 | 106701419 | G    | C        | -- | -- | Intron | SNP | 0.700 | 12 | 28 |
| --              | chr6 | 106864869 | A    | T        | -- | -- | IGR    | SNP | 0.182 | 18 | 4  |
| --              | chr6 | 107284186 | G    | A        | -- | -- | IGR    | SNP | 0.189 | 30 | 7  |
| <i>BEND3</i>    | chr6 | 107433748 | C    | G        | -- | -- | Intron | SNP | 0.333 | 30 | 15 |
| <i>BEND3</i>    | chr6 | 107433891 | C    | G        | -- | -- | Intron | SNP | 0.308 | 27 | 12 |
| <i>BEND3</i>    | chr6 | 107434471 | C    | T        | -- | -- | Intron | SNP | 0.371 | 39 | 23 |
| <i>BEND3</i>    | chr6 | 107434473 | C    | T        | -- | -- | Intron | SNP | 0.381 | 39 | 24 |
| <i>BEND3</i>    | chr6 | 107434677 | C    | G        | -- | -- | Intron | SNP | 0.313 | 22 | 10 |
| <i>BEND3</i>    | chr6 | 107434763 | C    | G        | -- | -- | Intron | SNP | 0.270 | 27 | 10 |
| <i>PDSS2</i>    | chr6 | 107610312 | C    | T        | -- | -- | Intron | SNP | 0.269 | 19 | 7  |
| <i>PDSS2</i>    | chr6 | 107779165 | A    | G        | -- | -- | Intron | SNP | 0.343 | 23 | 12 |
| --              | chr6 | 108009385 | A    | G        | -- | -- | IGR    | SNP | 0.313 | 33 | 15 |
| <i>SEC63</i>    | chr6 | 108204847 | TTA  | -        | -- | -- | Intron | DEL | 0.118 | 15 | 2  |
| <i>SEC63</i>    | chr6 | 108257441 | C    | A        | -- | -- | Intron | SNP | 0.231 | 20 | 6  |

|             |      |           |       |     |    |    |        |     |       |    |    |
|-------------|------|-----------|-------|-----|----|----|--------|-----|-------|----|----|
| SEC63       | chr6 | 108275297 | C     | T   | -- | -- | Intron | SNP | 0.138 | 25 | 4  |
| SEC63       | chr6 | 108275326 | G     | A   | -- | -- | Intron | SNP | 0.129 | 27 | 4  |
| OSTM1       | chr6 | 108369976 | G     | T   | -- | -- | Intron | SNP | 0.182 | 18 | 4  |
| LACE1       | chr6 | 108719886 | C     | G   | -- | -- | Intron | SNP | 0.357 | 27 | 15 |
| LACE1       | chr6 | 108784489 | C     | A   | -- | -- | Intron | SNP | 0.211 | 15 | 4  |
| --          | chr6 | 109047782 | T     | A   | -- | -- | IGR    | SNP | 0.400 | 6  | 4  |
| --          | chr6 | 109047784 | C     | A   | -- | -- | IGR    | SNP | 0.444 | 5  | 4  |
| --          | chr6 | 109056813 | G     | A   | -- | -- | IGR    | SNP | 0.667 | 15 | 30 |
| SESN1       | chr6 | 109342227 | G     | T   | -- | -- | Intron | SNP | 0.196 | 37 | 9  |
| SESN1       | chr6 | 109376894 | G     | A   | -- | -- | Intron | SNP | 0.278 | 13 | 5  |
| AKD1        | chr6 | 109958663 | C     | G   | -- | -- | Intron | SNP | 0.571 | 18 | 24 |
| FIG4        | chr6 | 110077784 | -     | AT  | -- | -- | Intron | INS | 0.111 | 23 | 3  |
| --          | chr6 | 110175784 | A     | T   | -- | -- | IGR    | SNP | 0.211 | 15 | 4  |
| WASF1       | chr6 | 110487092 | C     | T   | -- | -- | Intron | SNP | 0.275 | 29 | 11 |
| --          | chr6 | 110837580 | TC    | -   | -- | -- | IGR    | DEL | 0.147 | 29 | 5  |
| --          | chr6 | 110909970 | G     | C   | -- | -- | IGR    | SNP | 0.488 | 21 | 20 |
| --          | chr6 | 111299690 | G     | A   | -- | -- | IGR    | SNP | 0.158 | 32 | 6  |
| --          | chr6 | 111365727 | T     | A   | -- | -- | IGR    | SNP | 0.265 | 25 | 9  |
| --          | chr6 | 111979710 | T     | A   | -- | -- | IGR    | SNP | 0.188 | 26 | 6  |
| --          | chr6 | 112691383 | C     | T   | -- | -- | IGR    | SNP | 0.353 | 22 | 12 |
| --          | chr6 | 112829264 | C     | T   | -- | -- | IGR    | SNP | 0.333 | 10 | 5  |
| --          | chr6 | 112922037 | CAG   | -   | -- | -- | IGR    | DEL | 0.107 | 50 | 6  |
| --          | chr6 | 112983915 | G     | A   | -- | -- | IGR    | SNP | 0.303 | 23 | 10 |
| --          | chr6 | 113022471 | G     | T   | -- | -- | IGR    | SNP | 0.514 | 18 | 19 |
| --          | chr6 | 113047069 | C     | T   | -- | -- | IGR    | SNP | 0.298 | 33 | 14 |
| --          | chr6 | 113059982 | T     | A   | -- | -- | IGR    | SNP | 0.300 | 7  | 3  |
| --          | chr6 | 113197244 | T     | G   | -- | -- | IGR    | SNP | 0.241 | 22 | 7  |
| --          | chr6 | 113838688 | C     | A   | -- | -- | IGR    | SNP | 0.333 | 8  | 4  |
| --          | chr6 | 113874492 | A     | G   | -- | -- | IGR    | SNP | 0.405 | 25 | 17 |
| --          | chr6 | 114006729 | T     | G   | -- | -- | IGR    | SNP | 0.350 | 13 | 7  |
| --          | chr6 | 114462525 | C     | T   | -- | -- | IGR    | SNP | 0.235 | 26 | 8  |
| --          | chr6 | 114507796 | C     | T   | -- | -- | IGR    | SNP | 0.268 | 30 | 11 |
| --          | chr6 | 114586074 | C     | T   | -- | -- | IGR    | SNP | 0.375 | 15 | 9  |
| --          | chr6 | 114662425 | AGT   | -   | -- | -- | IGR    | DEL | 0.278 | 13 | 5  |
| --          | chr6 | 114841384 | -     | AAG | -- | -- | IGR    | INS | 0.286 | 24 | 10 |
| --          | chr6 | 115126246 | G     | T   | -- | -- | IGR    | SNP | 0.143 | 18 | 3  |
| --          | chr6 | 115236294 | A     | C   | -- | -- | IGR    | SNP | 0.500 | 3  | 3  |
| --          | chr6 | 115401366 | C     | T   | -- | -- | IGR    | SNP | 0.310 | 20 | 9  |
| --          | chr6 | 115464348 | A     | G   | -- | -- | IGR    | SNP | 0.290 | 22 | 9  |
| --          | chr6 | 115819982 | T     | G   | -- | -- | IGR    | SNP | 0.375 | 25 | 15 |
| --          | chr6 | 115926196 | G     | T   | -- | -- | IGR    | SNP | 0.250 | 12 | 4  |
| COL10A1.NT: | chr6 | 116443502 | A     | T   | -- | -- | Intron | SNP | 0.367 | 19 | 11 |
| FAM162B     | chr6 | 117074913 | G     | C   | -- | -- | Intron | SNP | 0.769 | 9  | 30 |
| --          | chr6 | 117091730 | C     | A   | -- | -- | IGR    | SNP | 0.600 | 12 | 18 |
| GPRC6A      | chr6 | 117137825 | G     | A   | -- | -- | Intron | SNP | 0.286 | 20 | 8  |
| --          | chr6 | 117412067 | C     | T   | -- | -- | IGR    | SNP | 0.102 | 44 | 5  |
| ROS1        | chr6 | 117669215 | T     | C   | -- | -- | Intron | SNP | 0.300 | 21 | 9  |
| ROS1        | chr6 | 117669393 | G     | A   | -- | -- | Intron | SNP | 0.630 | 10 | 17 |
| ROS1        | chr6 | 117723654 | C     | T   | -- | -- | Intron | SNP | 0.279 | 31 | 12 |
| --          | chr6 | 118061337 | T     | A   | -- | -- | IGR    | SNP | 0.342 | 25 | 13 |
| --          | chr6 | 118189050 | C     | T   | -- | -- | IGR    | SNP | 0.341 | 29 | 15 |
| SLC35F1     | chr6 | 118259522 | T     | C   | -- | -- | Intron | SNP | 0.513 | 19 | 20 |
| SLC35F1     | chr6 | 118467498 | C     | G   | -- | -- | Intron | SNP | 0.286 | 25 | 10 |
| --          | chr6 | 118642964 | G     | A   | -- | -- | IGR    | SNP | 0.178 | 37 | 8  |
| FAM184A     | chr6 | 119343218 | C     | T   | -- | -- | Intron | SNP | 0.235 | 13 | 4  |
| --          | chr6 | 119485358 | T     | A   | -- | -- | IGR    | SNP | 0.314 | 24 | 11 |
| --          | chr6 | 119973877 | A     | G   | -- | -- | IGR    | SNP | 0.231 | 20 | 6  |
| --          | chr6 | 120119348 | -     | CTT | -- | -- | IGR    | INS | 0.118 | 15 | 2  |
| --          | chr6 | 120867784 | G     | T   | -- | -- | IGR    | SNP | 0.286 | 30 | 12 |
| --          | chr6 | 120873148 | G     | A   | -- | -- | IGR    | SNP | 0.244 | 31 | 10 |
| --          | chr6 | 121045049 | G     | C   | -- | -- | IGR    | SNP | 0.138 | 25 | 4  |
| --          | chr6 | 121270744 | C     | G   | -- | -- | IGR    | SNP | 0.692 | 12 | 27 |
| C6orf170    | chr6 | 121413470 | G     | T   | -- | -- | Intron | SNP | 0.250 | 9  | 3  |
| C6orf170    | chr6 | 121491307 | TAC   | -   | -- | -- | Intron | DEL | 0.133 | 26 | 4  |
| --          | chr6 | 121800893 | G     | A   | -- | -- | IGR    | SNP | 0.283 | 33 | 13 |
| --          | chr6 | 121901743 | TA    | -   | -- | -- | IGR    | DEL | 0.105 | 17 | 2  |
| --          | chr6 | 121944253 | G     | T   | -- | -- | IGR    | SNP | 0.167 | 25 | 5  |
| --          | chr6 | 122454363 | G     | A   | -- | -- | IGR    | SNP | 0.294 | 24 | 10 |
| --          | chr6 | 122584178 | G     | A   | -- | -- | IGR    | SNP | 0.580 | 21 | 29 |
| PKIB        | chr6 | 122959613 | G     | A   | -- | -- | Intron | SNP | 0.614 | 17 | 27 |
| PKIB        | chr6 | 123008587 | C     | A   | -- | -- | Intron | SNP | 0.595 | 15 | 22 |
| PKIB        | chr6 | 123041787 | A     | T   | -- | -- | Intron | SNP | 0.361 | 23 | 13 |
| --          | chr6 | 123073795 | A     | T   | -- | -- | IGR    | SNP | 0.194 | 25 | 6  |
| --          | chr6 | 123163668 | GCCAA | -   | -- | -- | IGR    | DEL | 0.105 | 17 | 2  |
| --          | chr6 | 123203054 | A     | T   | -- | -- | IGR    | SNP | 0.382 | 21 | 13 |
| --          | chr6 | 123398893 | T     | C   | -- | -- | IGR    | SNP | 0.394 | 20 | 13 |
| --          | chr6 | 123450048 | G     | T   | -- | -- | IGR    | SNP | 0.296 | 19 | 8  |
| TRDN        | chr6 | 123563752 | C     | T   | -- | -- | Intron | SNP | 0.171 | 29 | 6  |
| TRDN        | chr6 | 123860312 | C     | T   | -- | -- | Intron | SNP | 0.389 | 22 | 14 |
| TRDN        | chr6 | 123882658 | G     | T   | -- | -- | Intron | SNP | 0.596 | 19 | 28 |

|           |      |           |     |      |    |    |         |     |       |    |    |
|-----------|------|-----------|-----|------|----|----|---------|-----|-------|----|----|
| --        | chr6 | 124045806 | C   | A    | -- | -- | IGR     | SNP | 0.667 | 8  | 16 |
| NKAIN2    | chr6 | 124137880 | G   | T    | -- | -- | Intron  | SNP | 0.320 | 34 | 16 |
| NKAIN2    | chr6 | 124399456 | G   | A    | -- | -- | Intron  | SNP | 0.258 | 23 | 8  |
| NKAIN2    | chr6 | 124766635 | G   | C    | -- | -- | Intron  | SNP | 0.200 | 28 | 7  |
| NKAIN2    | chr6 | 124779745 | T   | C    | -- | -- | Intron  | SNP | 0.269 | 38 | 14 |
| NKAIN2    | chr6 | 124805932 | T   | C    | -- | -- | Intron  | SNP | 0.294 | 24 | 10 |
| NKAIN2    | chr6 | 125086495 | T   | G    | -- | -- | Intron  | SNP | 0.278 | 26 | 10 |
| NKAIN2    | chr6 | 125105606 | C   | T    | -- | -- | Intron  | SNP | 0.353 | 22 | 12 |
| NKAIN2    | chr6 | 125118315 | C   | A    | -- | -- | Intron  | SNP | 0.300 | 14 | 6  |
| --        | chr6 | 125213336 | C   | A    | -- | -- | IGR     | SNP | 0.323 | 21 | 10 |
| --        | chr6 | 125216963 | C   | T    | -- | -- | IGR     | SNP | 0.129 | 27 | 4  |
| --        | chr6 | 125216990 | -   | TTTG | -- | -- | IGR     | INS | 0.129 | 27 | 4  |
| RNF217    | chr6 | 125399946 | C   | G    | -- | -- | Intron  | SNP | 0.333 | 36 | 18 |
| TPD52L1   | chr6 | 125493344 | CT  | -    | -- | -- | Intron  | DEL | 0.130 | 20 | 3  |
| --        | chr6 | 125701842 | T   | C    | -- | -- | IGR     | SNP | 0.633 | 11 | 19 |
| --        | chr6 | 125712244 | A   | G    | -- | -- | IGR     | SNP | 0.222 | 28 | 8  |
| --        | chr6 | 125722820 | C   | T    | -- | -- | IGR     | SNP | 0.235 | 13 | 4  |
| --        | chr6 | 125724759 | G   | C    | -- | -- | IGR     | SNP | 0.567 | 13 | 17 |
| --        | chr6 | 125724843 | G   | C    | -- | -- | IGR     | SNP | 0.619 | 16 | 26 |
| --        | chr6 | 125941998 | C   | A    | -- | -- | IGR     | SNP | 0.263 | 28 | 10 |
| --        | chr6 | 125977873 | T   | G    | -- | -- | IGR     | SNP | 0.129 | 27 | 4  |
| LOC643623 | chr6 | 126025564 | A   | G    | -- | -- | RNA     | SNP | 0.130 | 20 | 3  |
| LOC643623 | chr6 | 126026053 | AGT | -    | -- | -- | RNA     | DEL | 0.136 | 19 | 3  |
| LOC643623 | chr6 | 126026086 | C   | T    | -- | -- | RNA     | SNP | 0.158 | 16 | 3  |
| HEY2      | chr6 | 126079799 | C   | T    | -- | -- | Intron  | SNP | 0.350 | 26 | 14 |
| NCOA7     | chr6 | 126121994 | G   | A    | -- | -- | Intron  | SNP | 0.600 | 24 | 36 |
| --        | chr6 | 126381249 | C   | G    | -- | -- | IGR     | SNP | 0.264 | 39 | 14 |
| --        | chr6 | 126653205 | A   | G    | -- | -- | IGR     | SNP | 0.500 | 6  | 6  |
| --        | chr6 | 126653421 | A   | G    | -- | -- | IGR     | SNP | 0.250 | 18 | 6  |
| --        | chr6 | 126653431 | T   | A    | -- | -- | IGR     | SNP | 0.214 | 22 | 6  |
| --        | chr6 | 126653441 | C   | T    | -- | -- | IGR     | SNP | 0.214 | 22 | 6  |
| --        | chr6 | 126735798 | A   | G    | -- | -- | IGR     | SNP | 0.313 | 22 | 10 |
| --        | chr6 | 126757319 | C   | A    | -- | -- | IGR     | SNP | 0.290 | 22 | 9  |
| --        | chr6 | 126805468 | A   | G    | -- | -- | IGR     | SNP | 0.432 | 21 | 16 |
| --        | chr6 | 127000212 | G   | C    | -- | -- | IGR     | SNP | 0.150 | 17 | 3  |
| --        | chr6 | 127138993 | A   | G    | -- | -- | IGR     | SNP | 0.136 | 19 | 3  |
| --        | chr6 | 127280331 | C   | A    | -- | -- | IGR     | SNP | 0.387 | 19 | 12 |
| RSPO3     | chr6 | 127444344 | G   | C    | -- | -- | Intron  | SNP | 0.271 | 35 | 13 |
| --        | chr6 | 127568334 | C   | G    | -- | -- | IGR     | SNP | 0.108 | 33 | 4  |
| ECHDC1    | chr6 | 127645547 | T   | G    | -- | -- | Intron  | SNP | 0.564 | 17 | 22 |
| THEMIS    | chr6 | 128138923 | C   | G    | -- | -- | Intron  | SNP | 0.325 | 27 | 13 |
| THEMIS    | chr6 | 128162166 | G   | C    | -- | -- | Intron  | SNP | 0.596 | 19 | 28 |
| PTPRK     | chr6 | 128335296 | G   | C    | -- | -- | Intron  | SNP | 0.689 | 14 | 31 |
| PTPRK     | chr6 | 128549819 | AG  | -    | -- | -- | Intron  | DEL | 0.105 | 17 | 2  |
| PTPRK     | chr6 | 128668583 | T   | C    | -- | -- | Intron  | SNP | 0.333 | 22 | 11 |
| LAMA2     | chr6 | 129326652 | G   | T    | -- | -- | Intron  | SNP | 0.391 | 14 | 9  |
| LAMA2     | chr6 | 129453330 | G   | T    | -- | -- | Intron  | SNP | 0.308 | 9  | 4  |
| LAMA2     | chr6 | 129782593 | G   | C    | -- | -- | Intron  | SNP | 0.163 | 36 | 7  |
| LAMA2     | chr6 | 129806059 | C   | T    | -- | -- | Intron  | SNP | 0.550 | 18 | 22 |
| ARHGAP18  | chr6 | 129934395 | G   | A    | -- | -- | Intron  | SNP | 0.429 | 8  | 6  |
| --        | chr6 | 130200294 | G   | C    | -- | -- | IGR     | SNP | 0.103 | 35 | 4  |
| --        | chr6 | 130326135 | C   | A    | -- | -- | IGR     | SNP | 0.283 | 33 | 13 |
| --        | chr6 | 130603122 | C   | T    | -- | -- | IGR     | SNP | 0.412 | 30 | 21 |
| --        | chr6 | 130654925 | C   | T    | -- | -- | IGR     | SNP | 0.279 | 31 | 12 |
| --        | chr6 | 130857781 | G   | A    | -- | -- | IGR     | SNP | 0.294 | 36 | 15 |
| --        | chr6 | 130887088 | C   | T    | -- | -- | IGR     | SNP | 0.600 | 22 | 33 |
| EPB41L2   | chr6 | 131209338 | G   | A    | -- | -- | Intron  | SNP | 0.171 | 34 | 7  |
| --        | chr6 | 131419625 | G   | T    | -- | -- | IGR     | SNP | 0.188 | 13 | 3  |
| AKAP7     | chr6 | 131524725 | C   | A    | -- | -- | Intron  | SNP | 0.244 | 31 | 10 |
| --        | chr6 | 131638918 | G   | A    | -- | -- | IGR     | SNP | 0.533 | 21 | 24 |
| --        | chr6 | 131826289 | C   | T    | -- | -- | IGR     | SNP | 0.212 | 26 | 7  |
| ENPP3     | chr6 | 131974469 | G   | T    | -- | -- | Intron  | SNP | 0.190 | 17 | 4  |
| ENPP1     | chr6 | 132177983 | A   | G    | -- | -- | Intron  | SNP | 0.333 | 6  | 3  |
| --        | chr6 | 132264545 | C   | G    | -- | -- | IGR     | SNP | 0.263 | 28 | 10 |
| --        | chr6 | 132391782 | A   | C    | -- | -- | IGR     | SNP | 0.129 | 27 | 4  |
| --        | chr6 | 132601191 | GTA | -    | -- | -- | IGR     | DEL | 0.222 | 14 | 4  |
| STX7      | chr6 | 132817486 | T   | C    | -- | -- | Intron  | SNP | 0.452 | 23 | 19 |
| VNN1      | chr6 | 133030288 | G   | T    | -- | -- | Intron  | SNP | 0.304 | 32 | 14 |
| VNN2      | chr6 | 133080601 | C   | A    | -- | -- | Intron  | SNP | 0.190 | 17 | 4  |
| C6orf192  | chr6 | 133120388 | G   | T    | -- | -- | 5'Flank | SNP | 0.103 | 35 | 4  |
| --        | chr6 | 133162760 | C   | A    | -- | -- | IGR     | SNP | 0.400 | 6  | 4  |
| --        | chr6 | 133544876 | G   | T    | -- | -- | IGR     | SNP | 0.610 | 16 | 25 |
| --        | chr6 | 133553628 | C   | A    | -- | -- | IGR     | SNP | 0.233 | 33 | 10 |
| EYA4      | chr6 | 133572314 | C   | A    | -- | -- | Intron  | SNP | 0.172 | 24 | 5  |
| EYA4      | chr6 | 133659186 | C   | T    | -- | -- | Intron  | SNP | 0.475 | 21 | 19 |
| EYA4      | chr6 | 133732262 | G   | A    | -- | -- | Intron  | SNP | 0.700 | 6  | 14 |
| EYA4      | chr6 | 133809655 | C   | A    | -- | -- | Intron  | SNP | 0.218 | 43 | 12 |
| --        | chr6 | 134051267 | A   | G    | -- | -- | IGR     | SNP | 0.692 | 16 | 36 |
| TCF21     | chr6 | 134216378 | C   | T    | -- | -- | 3'UTR   | SNP | 0.351 | 24 | 13 |
| SGK1      | chr6 | 134539593 | A   | T    | -- | -- | Intron  | SNP | 0.182 | 18 | 4  |

|             |      |           |     |    |    |    |         |     |       |    |    |
|-------------|------|-----------|-----|----|----|----|---------|-----|-------|----|----|
| SGK1        | chr6 | 134565646 | G   | C  | -- | -- | Intron  | SNP | 0.233 | 33 | 10 |
| --          | chr6 | 134717512 | CT  | -  | -- | -- | IGR     | DEL | 0.136 | 19 | 3  |
| --          | chr6 | 134896066 | G   | C  | -- | -- | IGR     | SNP | 0.738 | 11 | 31 |
| --          | chr6 | 135168762 | C   | T  | -- | -- | IGR     | SNP | 0.274 | 45 | 17 |
| --          | chr6 | 135190965 | G   | C  | -- | -- | IGR     | SNP | 0.282 | 28 | 11 |
| --          | chr6 | 135423866 | C   | T  | -- | -- | IGR     | SNP | 0.275 | 29 | 11 |
| --          | chr6 | 135499926 | A   | T  | -- | -- | IGR     | SNP | 0.271 | 35 | 13 |
| --          | chr6 | 135570126 | C   | T  | -- | -- | IGR     | SNP | 0.313 | 33 | 15 |
| LINC00271   | chr6 | 135890720 | A   | G  | -- | -- | RNA     | SNP | 0.350 | 26 | 14 |
| --          | chr6 | 137910442 | C   | G  | -- | -- | IGR     | SNP | 0.283 | 33 | 13 |
| --          | chr6 | 137982665 | T   | G  | -- | -- | IGR     | SNP | 0.119 | 37 | 5  |
| --          | chr6 | 138049561 | G   | C  | -- | -- | IGR     | SNP | 0.634 | 15 | 26 |
| --          | chr6 | 138123611 | T   | A  | -- | -- | IGR     | SNP | 0.367 | 19 | 11 |
| --          | chr6 | 138330886 | C   | T  | -- | -- | IGR     | SNP | 0.136 | 19 | 3  |
| --          | chr6 | 138350511 | T   | C  | -- | -- | IGR     | SNP | 0.107 | 25 | 3  |
| PERP        | chr6 | 138409043 | C   | T  | -- | -- | 3'Flank | SNP | 0.313 | 33 | 15 |
| PERP        | chr6 | 138409054 | C   | T  | -- | -- | 3'Flank | SNP | 0.265 | 36 | 13 |
| PERP        | chr6 | 138409520 | C   | G  | -- | -- | 3'Flank | SNP | 0.526 | 18 | 20 |
| --          | chr6 | 138453352 | T   | A  | -- | -- | IGR     | SNP | 0.293 | 29 | 12 |
| REPS1       | chr6 | 139300317 | C   | A  | -- | -- | Intron  | SNP | 0.235 | 13 | 4  |
| HECA        | chr6 | 139458768 | C   | T  | -- | -- | Intron  | SNP | 0.190 | 17 | 4  |
| HECA        | chr6 | 139483747 | G   | C  | -- | -- | Intron  | SNP | 0.660 | 16 | 31 |
| HECA        | chr6 | 139483944 | G   | C  | -- | -- | Intron  | SNP | 0.643 | 20 | 36 |
| HECA        | chr6 | 139484161 | G   | A  | -- | -- | Intron  | SNP | 0.552 | 30 | 37 |
| --          | chr6 | 139661744 | T   | C  | -- | -- | IGR     | SNP | 0.313 | 11 | 5  |
| --          | chr6 | 139661748 | T   | C  | -- | -- | IGR     | SNP | 0.357 | 9  | 5  |
| --          | chr6 | 139749859 | G   | T  | -- | -- | IGR     | SNP | 0.148 | 23 | 4  |
| --          | chr6 | 139839479 | A   | C  | -- | -- | IGR     | SNP | 0.257 | 26 | 9  |
| --          | chr6 | 140032713 | TC  | -  | -- | -- | IGR     | DEL | 0.115 | 23 | 3  |
| LOC10013273 | chr6 | 140132438 | C   | A  | -- | -- | RNA     | SNP | 0.314 | 24 | 11 |
| --          | chr6 | 140222835 | G   | T  | -- | -- | IGR     | SNP | 0.222 | 14 | 4  |
| --          | chr6 | 140330155 | G   | A  | -- | -- | IGR     | SNP | 0.220 | 39 | 11 |
| --          | chr6 | 140441294 | C   | T  | -- | -- | IGR     | SNP | 0.258 | 23 | 8  |
| --          | chr6 | 140594990 | A   | G  | -- | -- | IGR     | SNP | 0.167 | 20 | 4  |
| --          | chr6 | 140704212 | A   | G  | -- | -- | IGR     | SNP | 0.286 | 25 | 10 |
| --          | chr6 | 140918255 | A   | T  | -- | -- | IGR     | SNP | 0.270 | 27 | 10 |
| --          | chr6 | 141103142 | T   | A  | -- | -- | IGR     | SNP | 0.135 | 32 | 5  |
| --          | chr6 | 141270132 | T   | A  | -- | -- | IGR     | SNP | 0.120 | 22 | 3  |
| --          | chr6 | 141685802 | T   | A  | -- | -- | IGR     | SNP | 0.156 | 27 | 5  |
| --          | chr6 | 142051749 | CAT | -  | -- | -- | IGR     | DEL | 0.675 | 13 | 27 |
| --          | chr6 | 142457509 | -   | GT | -- | -- | IGR     | INS | 0.111 | 16 | 2  |
| GPR126      | chr6 | 142716058 | G   | C  | -- | -- | Intron  | SNP | 0.200 | 28 | 7  |
| --          | chr6 | 143067225 | C   | A  | -- | -- | IGR     | SNP | 0.763 | 9  | 29 |
| LOC1005074  | chr6 | 143301837 | A   | T  | -- | -- | RNA     | SNP | 0.364 | 7  | 4  |
| LOC1005074  | chr6 | 143329902 | C   | T  | -- | -- | RNA     | SNP | 0.324 | 25 | 12 |
| AIG1        | chr6 | 143392527 | G   | A  | -- | -- | Intron  | SNP | 0.205 | 35 | 9  |
| AIG1        | chr6 | 143487760 | C   | A  | -- | -- | Intron  | SNP | 0.125 | 28 | 4  |
| PHACTR2     | chr6 | 144049433 | C   | A  | -- | -- | Intron  | SNP | 0.385 | 24 | 15 |
| --          | chr6 | 144402994 | T   | C  | -- | -- | IGR     | SNP | 0.292 | 17 | 7  |
| --          | chr6 | 144449256 | G   | A  | -- | -- | IGR     | SNP | 0.250 | 21 | 7  |
| UTRN        | chr6 | 144657451 | C   | T  | -- | -- | Intron  | SNP | 0.308 | 36 | 16 |
| UTRN        | chr6 | 144738510 | C   | T  | -- | -- | Intron  | SNP | 0.239 | 35 | 11 |
| UTRN        | chr6 | 144848279 | G   | T  | -- | -- | Intron  | SNP | 0.524 | 20 | 22 |
| UTRN        | chr6 | 145127729 | C   | G  | -- | -- | Intron  | SNP | 0.292 | 34 | 14 |
| --          | chr6 | 145738808 | G   | A  | -- | -- | IGR     | SNP | 0.719 | 9  | 23 |
| EPM2A       | chr6 | 146048046 | C   | A  | -- | -- | Intron  | SNP | 0.314 | 24 | 11 |
| LOC1005075  | chr6 | 146057426 | G   | T  | -- | -- | RNA     | SNP | 0.158 | 16 | 3  |
| --          | chr6 | 146294131 | A   | C  | -- | -- | IGR     | SNP | 0.333 | 28 | 14 |
| GRM1        | chr6 | 146376115 | G   | C  | -- | -- | Intron  | SNP | 0.359 | 25 | 14 |
| GRM1        | chr6 | 146404860 | G   | A  | -- | -- | Intron  | SNP | 0.423 | 15 | 11 |
| GRM1        | chr6 | 146698211 | A   | G  | -- | -- | Intron  | SNP | 0.214 | 33 | 9  |
| C6orf103    | chr6 | 146919464 | G   | A  | -- | -- | 5'Flank | SNP | 0.500 | 24 | 24 |
| C6orf103    | chr6 | 147131510 | G   | A  | -- | -- | Intron  | SNP | 0.114 | 31 | 4  |
| LOC729178   | chr6 | 147164392 | A   | T  | -- | -- | RNA     | SNP | 0.323 | 21 | 10 |
| LOC729178   | chr6 | 147270565 | G   | A  | -- | -- | RNA     | SNP | 0.313 | 44 | 20 |
| LOC729178   | chr6 | 147309210 | A   | C  | -- | -- | RNA     | SNP | 0.200 | 16 | 4  |
| LOC729178   | chr6 | 147384121 | G   | A  | -- | -- | RNA     | SNP | 0.343 | 23 | 12 |
| STXBP5      | chr6 | 147637710 | C   | A  | -- | -- | Intron  | SNP | 0.351 | 24 | 13 |
| --          | chr6 | 148209185 | G   | A  | -- | -- | IGR     | SNP | 0.371 | 22 | 13 |
| --          | chr6 | 148412139 | C   | A  | -- | -- | IGR     | SNP | 0.289 | 27 | 11 |
| --          | chr6 | 148611977 | -   | TC | -- | -- | IGR     | INS | 0.207 | 23 | 6  |
| SASH1       | chr6 | 148732075 | C   | T  | -- | -- | Intron  | SNP | 0.278 | 26 | 10 |
| SASH1       | chr6 | 148843322 | T   | G  | -- | -- | Intron  | SNP | 0.132 | 33 | 5  |
| --          | chr6 | 148964535 | G   | C  | -- | -- | IGR     | SNP | 0.108 | 33 | 4  |
| --          | chr6 | 148965893 | G   | A  | -- | -- | IGR     | SNP | 0.184 | 31 | 7  |
| --          | chr6 | 148965899 | G   | A  | -- | -- | IGR     | SNP | 0.184 | 31 | 7  |
| UST         | chr6 | 149252283 | G   | T  | -- | -- | Intron  | SNP | 0.320 | 17 | 8  |
| C6orf72     | chr6 | 149886716 | C   | G  | -- | -- | 5'Flank | SNP | 0.313 | 11 | 5  |
| LATS1       | chr6 | 149986272 | T   | G  | -- | -- | Intron  | SNP | 0.200 | 24 | 6  |
| PCMT1       | chr6 | 150116106 | C   | T  | -- | -- | Intron  | SNP | 0.625 | 18 | 30 |

|            |      |           |     |     |    |    |        |     |       |    |    |
|------------|------|-----------|-----|-----|----|----|--------|-----|-------|----|----|
| LOC1006527 | chr6 | 150193605 | A   | G   | -- | -- | RNA    | SNP | 0.393 | 17 | 11 |
| PPP1R14C   | chr6 | 150477197 | G   | A   | -- | -- | Intron | SNP | 0.154 | 22 | 4  |
| PPP1R14C   | chr6 | 150532431 | C   | T   | -- | -- | Intron | SNP | 0.607 | 24 | 37 |
| --         | chr6 | 150640513 | -   | GA  | -- | -- | IGR    | INS | 0.105 | 34 | 4  |
| --         | chr6 | 150735769 | CTA | -   | -- | -- | IGR    | DEL | 0.120 | 22 | 3  |
| --         | chr6 | 150847148 | G   | A   | -- | -- | IGR    | SNP | 0.333 | 38 | 19 |
| --         | chr6 | 150914566 | C   | T   | -- | -- | IGR    | SNP | 0.258 | 23 | 8  |
| PLEKHG1    | chr6 | 151081731 | A   | T   | -- | -- | Intron | SNP | 0.105 | 34 | 4  |
| PLEKHG1    | chr6 | 151095696 | G   | T   | -- | -- | Intron | SNP | 0.222 | 14 | 4  |
| MTHFD1L    | chr6 | 151230424 | C   | A   | -- | -- | Intron | SNP | 0.172 | 24 | 5  |
| --         | chr6 | 151443807 | C   | G   | -- | -- | IGR    | SNP | 0.306 | 25 | 11 |
| ESR1       | chr6 | 152268464 | T   | G   | -- | -- | Intron | SNP | 0.636 | 12 | 21 |
| ESR1       | chr6 | 152346114 | T   | C   | -- | -- | Intron | SNP | 0.150 | 17 | 3  |
| SYNE1      | chr6 | 152576572 | C   | G   | -- | -- | Intron | SNP | 0.244 | 31 | 10 |
| SYNE1      | chr6 | 152669050 | C   | T   | -- | -- | Intron | SNP | 0.115 | 23 | 3  |
| SYNE1      | chr6 | 152835773 | T   | A   | -- | -- | Intron | SNP | 0.174 | 19 | 4  |
| --         | chr6 | 152989086 | A   | T   | -- | -- | IGR    | SNP | 0.104 | 43 | 5  |
| --         | chr6 | 153001992 | -   | AG  | -- | -- | IGR    | INS | 0.148 | 23 | 4  |
| --         | chr6 | 153010075 | C   | A   | -- | -- | IGR    | SNP | 0.206 | 27 | 7  |
| --         | chr6 | 153119727 | C   | G   | -- | -- | IGR    | SNP | 0.382 | 21 | 13 |
| --         | chr6 | 153135920 | C   | T   | -- | -- | IGR    | SNP | 0.229 | 27 | 8  |
| --         | chr6 | 153136000 | A   | T   | -- | -- | IGR    | SNP | 0.250 | 21 | 7  |
| --         | chr6 | 153185243 | G   | A   | -- | -- | IGR    | SNP | 0.649 | 20 | 37 |
| --         | chr6 | 153206023 | C   | T   | -- | -- | IGR    | SNP | 0.143 | 18 | 3  |
| --         | chr6 | 153206219 | -   | AG  | -- | -- | IGR    | INS | 0.111 | 24 | 3  |
| --         | chr6 | 153206233 | AAT | -   | -- | -- | IGR    | DEL | 0.143 | 18 | 3  |
| RGS17      | chr6 | 153385859 | G   | A   | -- | -- | Intron | SNP | 0.263 | 28 | 10 |
| RGS17      | chr6 | 153425703 | C   | T   | -- | -- | Intron | SNP | 0.407 | 16 | 11 |
| --         | chr6 | 153662794 | A   | C   | -- | -- | IGR    | SNP | 0.238 | 32 | 10 |
| --         | chr6 | 154036924 | A   | T   | -- | -- | IGR    | SNP | 0.115 | 23 | 3  |
| --         | chr6 | 154138212 | C   | T   | -- | -- | IGR    | SNP | 0.195 | 33 | 8  |
| --         | chr6 | 154142801 | C   | T   | -- | -- | IGR    | SNP | 0.296 | 38 | 16 |
| --         | chr6 | 154281773 | A   | G   | -- | -- | IGR    | SNP | 0.241 | 22 | 7  |
| OPRM1      | chr6 | 154371177 | C   | A   | -- | -- | Intron | SNP | 0.400 | 21 | 14 |
| OPRM1      | chr6 | 154371178 | T   | C   | -- | -- | Intron | SNP | 0.412 | 20 | 14 |
| CNKSR3     | chr6 | 154752607 | C   | A   | -- | -- | Intron | SNP | 0.192 | 21 | 5  |
| --         | chr6 | 154929071 | G   | A   | -- | -- | IGR    | SNP | 0.548 | 19 | 23 |
| --         | chr6 | 155050606 | G   | T   | -- | -- | IGR    | SNP | 0.267 | 11 | 4  |
| --         | chr6 | 155350212 | -   | CTA | -- | -- | IGR    | INS | 0.176 | 14 | 3  |
| TIAM2      | chr6 | 155455541 | CA  | -   | -- | -- | Intron | DEL | 0.115 | 23 | 3  |
| NOX3       | chr6 | 155755484 | G   | A   | -- | -- | Intron | SNP | 0.340 | 35 | 18 |
| --         | chr6 | 156052732 | G   | A   | -- | -- | IGR    | SNP | 0.333 | 6  | 3  |
| --         | chr6 | 156148708 | A   | G   | -- | -- | IGR    | SNP | 0.282 | 28 | 11 |
| --         | chr6 | 156245685 | G   | C   | -- | -- | IGR    | SNP | 0.690 | 9  | 20 |
| --         | chr6 | 156998423 | G   | T   | -- | -- | IGR    | SNP | 0.250 | 12 | 4  |
| --         | chr6 | 157553992 | C   | A   | -- | -- | IGR    | SNP | 0.310 | 40 | 18 |
| --         | chr6 | 157556457 | C   | T   | -- | -- | IGR    | SNP | 0.129 | 27 | 4  |
| --         | chr6 | 157637470 | C   | A   | -- | -- | IGR    | SNP | 0.167 | 25 | 5  |
| C6orf35    | chr6 | 157738902 | G   | A   | -- | -- | Intron | SNP | 0.333 | 32 | 16 |
| --         | chr6 | 157746671 | T   | G   | -- | -- | IGR    | SNP | 0.589 | 23 | 33 |
| ZDHH14     | chr6 | 157842550 | G   | A   | -- | -- | Intron | SNP | 0.300 | 7  | 3  |
| ZDHH14     | chr6 | 157842552 | T   | A   | -- | -- | Intron | SNP | 0.250 | 9  | 3  |
| ZDHH14     | chr6 | 157868642 | C   | T   | -- | -- | Intron | SNP | 0.224 | 38 | 11 |
| ZDHH14     | chr6 | 158047932 | GGC | -   | -- | -- | Intron | DEL | 0.154 | 33 | 6  |
| --         | chr6 | 158130272 | C   | T   | -- | -- | IGR    | SNP | 0.267 | 11 | 4  |
| --         | chr6 | 158172053 | A   | C   | -- | -- | IGR    | SNP | 0.273 | 32 | 12 |
| --         | chr6 | 158529417 | G   | T   | -- | -- | IGR    | SNP | 0.294 | 12 | 5  |
| --         | chr6 | 158633108 | G   | T   | -- | -- | IGR    | SNP | 0.176 | 14 | 3  |
| --         | chr6 | 158689085 | G   | T   | -- | -- | IGR    | SNP | 0.174 | 19 | 4  |
| SYTL3      | chr6 | 159138135 | G   | A   | -- | -- | Intron | SNP | 0.500 | 16 | 16 |
| SYTL3      | chr6 | 159141459 | C   | A   | -- | -- | Intron | SNP | 0.250 | 9  | 3  |
| OSTCP1     | chr6 | 159264719 | C   | A   | -- | -- | RNA    | SNP | 0.200 | 16 | 4  |
| --         | chr6 | 159347844 | G   | A   | -- | -- | IGR    | SNP | 0.615 | 10 | 16 |
| FNDC1      | chr6 | 159616696 | G   | C   | -- | -- | Intron | SNP | 0.256 | 29 | 10 |
| --         | chr6 | 159704745 | -   | CTA | -- | -- | IGR    | INS | 0.125 | 14 | 2  |
| --         | chr6 | 159887848 | G   | A   | -- | -- | IGR    | SNP | 0.214 | 11 | 3  |
| --         | chr6 | 160119851 | G   | T   | -- | -- | IGR    | SNP | 0.317 | 28 | 13 |
| --         | chr6 | 160132194 | T   | C   | -- | -- | IGR    | SNP | 0.226 | 24 | 7  |
| --         | chr6 | 160132326 | T   | A   | -- | -- | IGR    | SNP | 0.412 | 10 | 7  |
| --         | chr6 | 160622889 | A   | T   | -- | -- | IGR    | SNP | 0.625 | 18 | 30 |
| --         | chr6 | 160629563 | C   | T   | -- | -- | IGR    | SNP | 0.211 | 30 | 8  |
| SLC22A3    | chr6 | 160779016 | G   | A   | -- | -- | Intron | SNP | 0.705 | 13 | 31 |
| LPA        | chr6 | 160991230 | C   | T   | -- | -- | Intron | SNP | 0.100 | 27 | 3  |
| MAP3K4     | chr6 | 161515752 | G   | T   | -- | -- | Intron | SNP | 0.128 | 34 | 5  |
| PARK2      | chr6 | 161816706 | G   | C   | -- | -- | Intron | SNP | 0.173 | 43 | 9  |
| PARK2      | chr6 | 161825361 | T   | C   | -- | -- | Intron | SNP | 0.109 | 41 | 5  |
| PARK2      | chr6 | 161978393 | G   | C   | -- | -- | Intron | SNP | 0.308 | 27 | 12 |
| PARK2      | chr6 | 161997943 | C   | A   | -- | -- | Intron | SNP | 0.205 | 31 | 8  |
| PARK2      | chr6 | 162034672 | C   | T   | -- | -- | Intron | SNP | 0.216 | 29 | 8  |
| PARK2      | chr6 | 162068744 | A   | G   | -- | -- | Intron | SNP | 0.724 | 8  | 21 |



|               |      |           |      |       |    |    |        |     |       |     |    |
|---------------|------|-----------|------|-------|----|----|--------|-----|-------|-----|----|
| PARK2         | chr6 | 162075465 | C    | T     | -- | -- | Intron | SNP | 0.238 | 16  | 5  |
| PARK2         | chr6 | 162109392 | T    | C     | -- | -- | Intron | SNP | 0.233 | 33  | 10 |
| PARK2         | chr6 | 162149262 | C    | T     | -- | -- | Intron | SNP | 0.115 | 23  | 3  |
| PARK2         | chr6 | 162285975 | C    | T     | -- | -- | Intron | SNP | 0.323 | 21  | 10 |
| PARK2         | chr6 | 162373671 | A    | T     | -- | -- | Intron | SNP | 0.700 | 9   | 21 |
| PARK2         | chr6 | 162413243 | G    | A     | -- | -- | Intron | SNP | 0.250 | 30  | 10 |
| PARK2         | chr6 | 162515528 | A    | C     | -- | -- | Intron | SNP | 0.324 | 23  | 11 |
| PARK2         | chr6 | 162542858 | A    | T     | -- | -- | Intron | SNP | 0.269 | 38  | 14 |
| PARK2         | chr6 | 162656962 | G    | C     | -- | -- | Intron | SNP | 0.188 | 13  | 3  |
| PARK2         | chr6 | 162681527 | G    | T     | -- | -- | Intron | SNP | 0.200 | 24  | 6  |
| PARK2         | chr6 | 162987562 | TAGA | -     | -- | -- | Intron | DEL | 0.211 | 30  | 8  |
| PACRG         | chr6 | 163416317 | G    | C     | -- | -- | Intron | SNP | 0.167 | 15  | 3  |
| PACRG         | chr6 | 163607240 | C    | A     | -- | -- | Intron | SNP | 0.240 | 38  | 12 |
| --            | chr6 | 164117221 | A    | G     | -- | -- | IGR    | SNP | 0.263 | 28  | 10 |
| --            | chr6 | 164191897 | C    | A     | -- | -- | IGR    | SNP | 0.235 | 26  | 8  |
| --            | chr6 | 164587323 | C    | A     | -- | -- | IGR    | SNP | 0.328 | 39  | 19 |
| --            | chr6 | 164607677 | T    | G     | -- | -- | IGR    | SNP | 0.464 | 15  | 13 |
| --            | chr6 | 164751855 | A    | G     | -- | -- | IGR    | SNP | 0.500 | 14  | 14 |
| --            | chr6 | 164760991 | G    | A     | -- | -- | IGR    | SNP | 0.139 | 31  | 5  |
| --            | chr6 | 164937693 | C    | G     | -- | -- | IGR    | SNP | 0.323 | 21  | 10 |
| --            | chr6 | 165096720 | T    | A     | -- | -- | IGR    | SNP | 0.429 | 20  | 15 |
| --            | chr6 | 165181307 | C    | T     | -- | -- | IGR    | SNP | 0.433 | 17  | 13 |
| --            | chr6 | 165287190 | TC   | -     | -- | -- | IGR    | DEL | 0.286 | 30  | 12 |
| --            | chr6 | 165509130 | T    | A     | -- | -- | IGR    | SNP | 0.360 | 16  | 9  |
| C6orf118      | chr6 | 165708838 | C    | T     | -- | -- | Intron | SNP | 0.293 | 29  | 12 |
| --            | chr6 | 165729156 | G    | T     | -- | -- | IGR    | SNP | 0.111 | 40  | 5  |
| PDE10A        | chr6 | 165863283 | C    | T     | -- | -- | Intron | SNP | 0.371 | 22  | 13 |
| PDE10A        | chr6 | 166040527 | -    | ATCTG | -- | -- | Intron | INS | 0.206 | 27  | 7  |
| PDE10A        | chr6 | 166059358 | G    | A     | -- | -- | Intron | SNP | 0.222 | 14  | 4  |
| --            | chr6 | 166094912 | -    | GTC   | -- | -- | IGR    | INS | 0.156 | 27  | 5  |
| --            | chr6 | 166130210 | C    | A     | -- | -- | IGR    | SNP | 0.319 | 32  | 15 |
| --            | chr6 | 166131648 | A    | C     | -- | -- | IGR    | SNP | 0.682 | 14  | 30 |
| LINC00473     | chr6 | 166355525 | G    | A     | -- | -- | RNA    | SNP | 0.594 | 13  | 19 |
| RPS6KA2       | chr6 | 166838872 | C    | T     | -- | -- | Intron | SNP | 0.167 | 20  | 4  |
| RPS6KA2       | chr6 | 167003768 | C    | T     | -- | -- | Intron | SNP | 0.370 | 29  | 17 |
| --            | chr6 | 167278547 | A    | G     | -- | -- | IGR    | SNP | 0.214 | 33  | 9  |
| --            | chr6 | 167668358 | C    | A     | -- | -- | IGR    | SNP | 0.125 | 42  | 6  |
| --            | chr6 | 167799328 | G    | A     | -- | -- | IGR    | SNP | 0.261 | 17  | 6  |
| --            | chr6 | 168066822 | G    | C     | -- | -- | IGR    | SNP | 0.621 | 22  | 36 |
| MLLT4         | chr6 | 168268039 | A    | T     | -- | -- | Intron | SNP | 0.622 | 14  | 23 |
| MLLT4         | chr6 | 168327095 | C    | A     | -- | -- | Intron | SNP | 0.273 | 24  | 9  |
| MLLT4         | chr6 | 168331898 | T    | G     | -- | -- | Intron | SNP | 0.270 | 46  | 17 |
| --            | chr6 | 168638180 | A    | G     | -- | -- | IGR    | SNP | 0.186 | 35  | 8  |
| --            | chr6 | 168758891 | G    | C     | -- | -- | IGR    | SNP | 0.389 | 11  | 7  |
| --            | chr6 | 168758903 | C    | T     | -- | -- | IGR    | SNP | 0.286 | 10  | 4  |
| SMOC2         | chr6 | 168886361 | G    | T     | -- | -- | Intron | SNP | 0.323 | 21  | 10 |
| SMOC2         | chr6 | 168889656 | G    | A     | -- | -- | Intron | SNP | 0.122 | 36  | 5  |
| SMOC2         | chr6 | 168890789 | G    | C     | -- | -- | Intron | SNP | 0.122 | 36  | 5  |
| SMOC2         | chr6 | 168994944 | -    | CGAG  | -- | -- | Intron | INS | 0.214 | 11  | 3  |
| SMOC2         | chr6 | 169000027 | A    | C     | -- | -- | Intron | SNP | 0.377 | 38  | 23 |
| SMOC2         | chr6 | 169016257 | G    | T     | -- | -- | Intron | SNP | 0.125 | 21  | 3  |
| SMOC2         | chr6 | 169016432 | T    | C     | -- | -- | Intron | SNP | 0.119 | 37  | 5  |
| SMOC2         | chr6 | 169050359 | A    | C     | -- | -- | Intron | SNP | 0.211 | 15  | 4  |
| SMOC2         | chr6 | 169050575 | G    | A     | -- | -- | Intron | SNP | 0.286 | 25  | 10 |
| SMOC2         | chr6 | 169055521 | G    | A     | -- | -- | Intron | SNP | 0.364 | 14  | 8  |
| --            | chr6 | 169117427 | T    | C     | -- | -- | IGR    | SNP | 0.317 | 28  | 13 |
| --            | chr6 | 169117428 | G    | T     | -- | -- | IGR    | SNP | 0.317 | 28  | 13 |
| --            | chr6 | 169144160 | G    | A     | -- | -- | IGR    | SNP | 0.273 | 32  | 12 |
| --            | chr6 | 169169198 | A    | C     | -- | -- | IGR    | SNP | 0.339 | 37  | 19 |
| --            | chr6 | 169539963 | C    | T     | -- | -- | IGR    | SNP | 0.244 | 31  | 10 |
| --            | chr6 | 169560932 | G    | A     | -- | -- | IGR    | SNP | 0.220 | 39  | 11 |
| WDR27         | chr6 | 169953124 | A    | G     | -- | -- | Intron | SNP | 0.278 | 13  | 5  |
| C6orf208,LINC | chr6 | 170198706 | C    | T     | -- | -- | RNA    | SNP | 0.348 | 30  | 16 |
| --            | chr6 | 170529898 | G    | A     | -- | -- | IGR    | SNP | 0.103 | 35  | 4  |
| --            | chr6 | 170530010 | C    | T     | -- | -- | IGR    | SNP | 0.113 | 63  | 8  |
| FAM120B       | chr6 | 170646815 | C    | T     | -- | -- | Intron | SNP | 0.276 | 21  | 8  |
| FAM120B       | chr6 | 170647151 | C    | G     | -- | -- | Intron | SNP | 0.308 | 9   | 4  |
| FAM120B       | chr6 | 170703698 | C    | T     | -- | -- | Intron | SNP | 0.119 | 118 | 16 |
| --            | chr6 | 170730910 | C    | T     | -- | -- | IGR    | SNP | 0.142 | 103 | 17 |
| --            | chr6 | 170755757 | G    | A     | -- | -- | IGR    | SNP | 0.196 | 45  | 11 |
| --            | chr6 | 170774548 | A    | T     | -- | -- | IGR    | SNP | 0.683 | 13  | 28 |
| --            | chr6 | 170775780 | A    | G     | -- | -- | IGR    | SNP | 0.208 | 19  | 5  |
| --            | chr6 | 170789274 | G    | A     | -- | -- | IGR    | SNP | 0.623 | 20  | 33 |
| --            | chr6 | 170817382 | G    | A     | -- | -- | IGR    | SNP | 0.161 | 26  | 5  |
| --            | chr6 | 170818752 | T    | A     | -- | -- | IGR    | SNP | 0.148 | 23  | 4  |
| --            | chr6 | 170967868 | T    | C     | -- | -- | IGR    | SNP | 0.250 | 9   | 3  |
| --            | chr6 | 171009188 | C    | G     | -- | -- | IGR    | SNP | 0.162 | 31  | 6  |
| --            | chr6 | 171019769 | C    | T     | -- | -- | IGR    | SNP | 0.222 | 14  | 4  |
| --            | chr6 | 171029801 | -    | AG    | -- | -- | IGR    | INS | 0.128 | 41  | 6  |
| FAM20C        | chr7 | 224528    | C    | T     | -- | -- | Intron | SNP | 0.533 | 7   | 8  |

|           |      |          |      |   |    |    |         |     |       |    |    |
|-----------|------|----------|------|---|----|----|---------|-----|-------|----|----|
| FAM20C    | chr7 | 224531   | A    | C | -- | -- | Intron  | SNP | 0.533 | 7  | 8  |
| FAM20C    | chr7 | 224532   | G    | A | -- | -- | Intron  | SNP | 0.500 | 7  | 7  |
| --        | chr7 | 339468   | T    | A | -- | -- | IGR     | SNP | 0.167 | 30 | 6  |
| --        | chr7 | 410812   | G    | T | -- | -- | IGR     | SNP | 0.250 | 9  | 3  |
| PRKAR1B   | chr7 | 746022   | G    | T | -- | -- | Intron  | SNP | 0.471 | 9  | 8  |
| HEATR2    | chr7 | 772150   | C    | G | -- | -- | Intron  | SNP | 0.868 | 5  | 33 |
| ADAP1     | chr7 | 973221   | G    | A | -- | -- | Intron  | SNP | 0.500 | 3  | 3  |
| --        | chr7 | 1249972  | C    | A | -- | -- | IGR     | SNP | 0.500 | 4  | 4  |
| --        | chr7 | 1291972  | T    | G | -- | -- | IGR     | SNP | 0.267 | 11 | 4  |
| KIAA1908  | chr7 | 1614695  | C    | T | -- | -- | RNA     | SNP | 0.333 | 8  | 4  |
| --        | chr7 | 1688692  | C    | T | -- | -- | IGR     | SNP | 0.774 | 7  | 24 |
| --        | chr7 | 1819501  | G    | T | -- | -- | IGR     | SNP | 0.300 | 7  | 3  |
| --        | chr7 | 1839852  | G    | A | -- | -- | IGR     | SNP | 0.488 | 22 | 21 |
| MAD1L1    | chr7 | 1869188  | A    | C | -- | -- | Intron  | SNP | 0.190 | 17 | 4  |
| MAD1L1    | chr7 | 1954366  | C    | T | -- | -- | Intron  | SNP | 0.769 | 3  | 10 |
| MAD1L1    | chr7 | 2201027  | C    | T | -- | -- | Intron  | SNP | 0.395 | 23 | 15 |
| --        | chr7 | 2940504  | G    | T | -- | -- | IGR     | SNP | 0.240 | 19 | 6  |
| CARD11    | chr7 | 2967062  | T    | G | -- | -- | Intron  | SNP | 0.455 | 12 | 10 |
| CARD11    | chr7 | 2967063  | G    | T | -- | -- | Intron  | SNP | 0.455 | 12 | 10 |
| CARD11    | chr7 | 3028892  | C    | A | -- | -- | Intron  | SNP | 0.200 | 16 | 4  |
| --        | chr7 | 3142998  | G    | T | -- | -- | IGR     | SNP | 0.188 | 13 | 3  |
| --        | chr7 | 3188100  | C    | G | -- | -- | IGR     | SNP | 0.900 | 2  | 18 |
| --        | chr7 | 3188542  | C    | T | -- | -- | IGR     | SNP | 0.917 | 1  | 11 |
| --        | chr7 | 3191209  | C    | T | -- | -- | IGR     | SNP | 0.900 | 2  | 18 |
| --        | chr7 | 4429744  | A    | G | -- | -- | IGR     | SNP | 0.333 | 6  | 3  |
| --        | chr7 | 4510631  | A    | G | -- | -- | IGR     | SNP | 0.929 | 2  | 26 |
| --        | chr7 | 4535831  | G    | T | -- | -- | IGR     | SNP | 0.222 | 21 | 6  |
| RNF216    | chr7 | 5787881  | G    | T | -- | -- | Intron  | SNP | 0.286 | 30 | 12 |
| RNF216    | chr7 | 5821368  | A    | G | -- | -- | 5'Flank | SNP | 0.103 | 26 | 3  |
| CYTH3     | chr7 | 6240429  | C    | T | -- | -- | Intron  | SNP | 0.838 | 6  | 31 |
| --        | chr7 | 6691636  | G    | A | -- | -- | IGR     | SNP | 0.391 | 14 | 9  |
| --        | chr7 | 6711546  | A    | G | -- | -- | IGR     | SNP | 0.167 | 20 | 4  |
| --        | chr7 | 6919333  | G    | A | -- | -- | IGR     | SNP | 0.147 | 29 | 5  |
| --        | chr7 | 6919376  | C    | T | -- | -- | IGR     | SNP | 0.188 | 26 | 6  |
| --        | chr7 | 6926700  | C    | T | -- | -- | IGR     | SNP | 0.231 | 20 | 6  |
| --        | chr7 | 6967087  | A    | T | -- | -- | IGR     | SNP | 0.147 | 29 | 5  |
| --        | chr7 | 6968332  | C    | T | -- | -- | IGR     | SNP | 0.189 | 30 | 7  |
| --        | chr7 | 6978626  | T    | C | -- | -- | IGR     | SNP | 0.143 | 24 | 4  |
| --        | chr7 | 6983850  | A    | G | -- | -- | IGR     | SNP | 0.333 | 10 | 5  |
| --        | chr7 | 7029327  | C    | T | -- | -- | IGR     | SNP | 0.129 | 27 | 4  |
| --        | chr7 | 7031665  | G    | A | -- | -- | IGR     | SNP | 0.136 | 19 | 3  |
| LOC729852 | chr7 | 7717306  | T    | G | -- | -- | RNA     | SNP | 0.333 | 10 | 5  |
| LOC729852 | chr7 | 7888415  | C    | T | -- | -- | RNA     | SNP | 0.920 | 2  | 23 |
| LOC729852 | chr7 | 7919436  | G    | C | -- | -- | 3'Flank | SNP | 0.514 | 17 | 18 |
| GLCCI1    | chr7 | 8122361  | C    | A | -- | -- | Intron  | SNP | 0.800 | 4  | 16 |
| NXPH1     | chr7 | 8499406  | T    | C | -- | -- | Intron  | SNP | 0.423 | 15 | 11 |
| NXPH1     | chr7 | 8626257  | AAT  | - | -- | -- | Intron  | DEL | 0.111 | 16 | 2  |
| NXPH1     | chr7 | 8766002  | G    | A | -- | -- | Intron  | SNP | 0.136 | 19 | 3  |
| NXPH1     | chr7 | 8766045  | A    | C | -- | -- | Intron  | SNP | 0.150 | 17 | 3  |
| --        | chr7 | 9203004  | CATT | - | -- | -- | IGR     | DEL | 0.125 | 21 | 3  |
| --        | chr7 | 9263362  | C    | G | -- | -- | IGR     | SNP | 0.731 | 7  | 19 |
| --        | chr7 | 9393713  | G    | A | -- | -- | IGR     | SNP | 0.136 | 19 | 3  |
| --        | chr7 | 9432548  | C    | A | -- | -- | IGR     | SNP | 0.684 | 6  | 13 |
| --        | chr7 | 9480738  | T    | C | -- | -- | IGR     | SNP | 0.556 | 8  | 10 |
| --        | chr7 | 9602871  | T    | A | -- | -- | IGR     | SNP | 0.389 | 11 | 7  |
| PER4      | chr7 | 9673886  | A    | T | -- | -- | 5'Flank | SNP | 0.893 | 3  | 25 |
| --        | chr7 | 9797553  | T    | G | -- | -- | IGR     | SNP | 0.839 | 5  | 26 |
| --        | chr7 | 9797658  | G    | C | -- | -- | IGR     | SNP | 0.893 | 3  | 25 |
| --        | chr7 | 9873290  | C    | G | -- | -- | IGR     | SNP | 0.375 | 10 | 6  |
| --        | chr7 | 9978619  | A    | C | -- | -- | IGR     | SNP | 0.842 | 3  | 16 |
| --        | chr7 | 10050369 | C    | G | -- | -- | IGR     | SNP | 0.333 | 18 | 9  |
| --        | chr7 | 10359410 | TTC  | - | -- | -- | IGR     | DEL | 0.107 | 25 | 3  |
| --        | chr7 | 10360632 | G    | A | -- | -- | IGR     | SNP | 0.519 | 13 | 14 |
| --        | chr7 | 10510684 | T    | C | -- | -- | IGR     | SNP | 0.207 | 23 | 6  |
| --        | chr7 | 10519071 | A    | T | -- | -- | IGR     | SNP | 0.963 | 1  | 26 |
| --        | chr7 | 10586563 | G    | A | -- | -- | IGR     | SNP | 0.897 | 3  | 26 |
| THSD7A    | chr7 | 11565470 | C    | G | -- | -- | Intron  | SNP | 0.840 | 4  | 21 |
| THSD7A    | chr7 | 11692761 | A    | T | -- | -- | Intron  | SNP | 0.200 | 16 | 4  |
| THSD7A    | chr7 | 11692762 | G    | T | -- | -- | Intron  | SNP | 0.211 | 15 | 4  |
| --        | chr7 | 12222939 | A    | G | -- | -- | IGR     | SNP | 0.800 | 1  | 4  |
| --        | chr7 | 12353067 | G    | A | -- | -- | IGR     | SNP | 0.208 | 19 | 5  |
| --        | chr7 | 12353104 | G    | T | -- | -- | IGR     | SNP | 0.286 | 10 | 4  |
| --        | chr7 | 12567137 | G    | A | -- | -- | IGR     | SNP | 0.400 | 12 | 8  |
| --        | chr7 | 12567138 | T    | A | -- | -- | IGR     | SNP | 0.400 | 12 | 8  |
| --        | chr7 | 12567217 | A    | T | -- | -- | IGR     | SNP | 0.109 | 41 | 5  |
| --        | chr7 | 12608856 | G    | A | -- | -- | IGR     | SNP | 0.130 | 20 | 3  |
| SCIN      | chr7 | 12675236 | C    | A | -- | -- | Intron  | SNP | 0.800 | 1  | 4  |
| --        | chr7 | 12750804 | A    | T | -- | -- | IGR     | SNP | 0.200 | 24 | 6  |
| --        | chr7 | 13141659 | G    | A | -- | -- | IGR     | SNP | 0.160 | 21 | 4  |
| --        | chr7 | 13540449 | C    | T | -- | -- | IGR     | SNP | 0.762 | 5  | 16 |

|                    |      |          |     |     |    |    |        |     |       |    |    |
|--------------------|------|----------|-----|-----|----|----|--------|-----|-------|----|----|
| --                 | chr7 | 14055153 | C   | T   | -- | -- | IGR    | SNP | 0.200 | 20 | 5  |
| <i>DGKB</i>        | chr7 | 14205974 | C   | G   | -- | -- | Intron | SNP | 0.864 | 3  | 19 |
| <i>DGKB</i>        | chr7 | 14251990 | -   | TA  | -- | -- | Intron | INS | 0.414 | 17 | 12 |
| <i>DGKB</i>        | chr7 | 14272013 | AG  | -   | -- | -- | Intron | DEL | 0.125 | 14 | 2  |
| <i>DGKB</i>        | chr7 | 14387341 | A   | C   | -- | -- | Intron | SNP | 0.342 | 25 | 13 |
| <i>DGKB</i>        | chr7 | 14516469 | T   | C   | -- | -- | Intron | SNP | 0.360 | 16 | 9  |
| <i>DGKB</i>        | chr7 | 14646226 | A   | T   | -- | -- | Intron | SNP | 0.364 | 14 | 8  |
| --                 | chr7 | 15021494 | A   | C   | -- | -- | IGR    | SNP | 0.892 | 4  | 33 |
| --                 | chr7 | 15178846 | T   | G   | -- | -- | IGR    | SNP | 0.138 | 25 | 4  |
| <i>AGMO</i>        | chr7 | 15513087 | C   | A   | -- | -- | Intron | SNP | 0.190 | 17 | 4  |
| --                 | chr7 | 15606434 | G   | A   | -- | -- | IGR    | SNP | 0.333 | 16 | 8  |
| --                 | chr7 | 15952859 | T   | A   | -- | -- | IGR    | SNP | 0.182 | 18 | 4  |
| <i>LOC10050604</i> | chr7 | 16580360 | G   | T   | -- | -- | Intron | SNP | 0.333 | 32 | 16 |
| --                 | chr7 | 17189873 | A   | C   | -- | -- | IGR    | SNP | 0.886 | 4  | 31 |
| --                 | chr7 | 17665375 | A   | G   | -- | -- | IGR    | SNP | 0.176 | 14 | 3  |
| --                 | chr7 | 18087350 | T   | C   | -- | -- | IGR    | SNP | 0.130 | 20 | 3  |
| <i>HDAC9</i>       | chr7 | 18247277 | TAC | -   | -- | -- | Intron | DEL | 0.105 | 17 | 2  |
| <i>HDAC9</i>       | chr7 | 18676883 | A   | G   | -- | -- | Intron | SNP | 0.476 | 11 | 10 |
| <i>HDAC9</i>       | chr7 | 18927950 | A   | G   | -- | -- | Intron | SNP | 0.188 | 13 | 3  |
| <i>HDAC9</i>       | chr7 | 19002528 | T   | G   | -- | -- | Intron | SNP | 0.406 | 19 | 13 |
| --                 | chr7 | 19142146 | C   | A   | -- | -- | IGR    | SNP | 0.130 | 20 | 3  |
| --                 | chr7 | 19217065 | G   | C   | -- | -- | IGR    | SNP | 0.451 | 28 | 23 |
| --                 | chr7 | 19928694 | CTG | -   | -- | -- | IGR    | DEL | 0.111 | 16 | 2  |
| --                 | chr7 | 20901095 | C   | T   | -- | -- | IGR    | SNP | 0.667 | 6  | 12 |
| --                 | chr7 | 21041976 | G   | C   | -- | -- | IGR    | SNP | 0.227 | 17 | 5  |
| --                 | chr7 | 21340154 | GTA | -   | -- | -- | IGR    | DEL | 0.111 | 16 | 2  |
| --                 | chr7 | 21392565 | C   | T   | -- | -- | IGR    | SNP | 0.824 | 6  | 28 |
| <i>STEAP1B</i>     | chr7 | 22496596 | T   | A   | -- | -- | Intron | SNP | 0.500 | 3  | 3  |
| --                 | chr7 | 22730502 | A   | G   | -- | -- | IGR    | SNP | 0.457 | 19 | 16 |
| --                 | chr7 | 23076366 | C   | T   | -- | -- | IGR    | SNP | 0.273 | 8  | 3  |
| --                 | chr7 | 23581374 | C   | T   | -- | -- | IGR    | SNP | 0.889 | 2  | 16 |
| --                 | chr7 | 23587930 | G   | T   | -- | -- | IGR    | SNP | 0.350 | 26 | 14 |
| --                 | chr7 | 24206519 | G   | A   | -- | -- | IGR    | SNP | 0.273 | 8  | 3  |
| --                 | chr7 | 24224116 | A   | G   | -- | -- | IGR    | SNP | 0.318 | 15 | 7  |
| <i>MPP6</i>        | chr7 | 24642255 | C   | G   | -- | -- | Intron | SNP | 0.130 | 20 | 3  |
| <i>OSBPL3</i>      | chr7 | 24885003 | T   | A   | -- | -- | Intron | SNP | 0.250 | 12 | 4  |
| --                 | chr7 | 25262368 | TA  | -   | -- | -- | IGR    | DEL | 0.111 | 16 | 2  |
| --                 | chr7 | 25505927 | A   | C   | -- | -- | IGR    | SNP | 0.355 | 20 | 11 |
| --                 | chr7 | 25620552 | C   | T   | -- | -- | IGR    | SNP | 0.862 | 4  | 25 |
| --                 | chr7 | 25896620 | C   | G   | -- | -- | IGR    | SNP | 0.217 | 18 | 5  |
| --                 | chr7 | 26003395 | A   | T   | -- | -- | IGR    | SNP | 0.250 | 12 | 4  |
| --                 | chr7 | 26093885 | C   | T   | -- | -- | IGR    | SNP | 0.107 | 25 | 3  |
| --                 | chr7 | 26172634 | AG  | -   | -- | -- | IGR    | DEL | 0.143 | 24 | 4  |
| --                 | chr7 | 26277322 | C   | T   | -- | -- | IGR    | SNP | 0.303 | 23 | 10 |
| <i>SNX10</i>       | chr7 | 26365050 | C   | T   | -- | -- | Intron | SNP | 0.750 | 3  | 9  |
| <i>SNX10</i>       | chr7 | 26394980 | T   | C   | -- | -- | Intron | SNP | 0.545 | 15 | 18 |
| --                 | chr7 | 26435065 | C   | A   | -- | -- | IGR    | SNP | 0.267 | 11 | 4  |
| --                 | chr7 | 27101980 | C   | A   | -- | -- | IGR    | SNP | 0.235 | 13 | 4  |
| --                 | chr7 | 27303829 | C   | A   | -- | -- | IGR    | SNP | 0.214 | 11 | 3  |
| --                 | chr7 | 27331889 | -   | GAA | -- | -- | IGR    | INS | 0.222 | 14 | 4  |
| <i>HIBADH</i>      | chr7 | 27637079 | AC  | -   | -- | -- | Intron | DEL | 0.120 | 22 | 3  |
| <i>JAZF1</i>       | chr7 | 27895425 | C   | G   | -- | -- | Intron | SNP | 0.857 | 3  | 18 |
| <i>JAZF1</i>       | chr7 | 27949013 | G   | C   | -- | -- | Intron | SNP | 0.636 | 8  | 14 |
| <i>CREB5</i>       | chr7 | 28382344 | A   | T   | -- | -- | Intron | SNP | 0.385 | 16 | 10 |
| <i>CREB5</i>       | chr7 | 28647402 | G   | T   | -- | -- | Intron | SNP | 0.133 | 26 | 4  |
| <i>CHN2</i>        | chr7 | 29280414 | C   | T   | -- | -- | Intron | SNP | 0.121 | 29 | 4  |
| <i>CHN2</i>        | chr7 | 29336539 | G   | T   | -- | -- | Intron | SNP | 0.241 | 44 | 14 |
| <i>CHN2</i>        | chr7 | 29408197 | A   | G   | -- | -- | Intron | SNP | 0.590 | 16 | 23 |
| --                 | chr7 | 29626308 | A   | T   | -- | -- | IGR    | SNP | 0.208 | 38 | 10 |
| <i>DPY19L2P3</i>   | chr7 | 29767907 | T   | C   | -- | -- | RNA    | SNP | 0.209 | 34 | 9  |
| <i>PLEKHA8</i>     | chr7 | 30097538 | A   | T   | -- | -- | Intron | SNP | 0.179 | 32 | 7  |
| <i>ZNRF2</i>       | chr7 | 30329236 | A   | G   | -- | -- | Intron | SNP | 0.106 | 42 | 5  |
| --                 | chr7 | 30417252 | C   | G   | -- | -- | IGR    | SNP | 0.682 | 14 | 30 |
| --                 | chr7 | 30417797 | C   | T   | -- | -- | IGR    | SNP | 0.596 | 21 | 31 |
| <i>LOC401320</i>   | chr7 | 30605978 | A   | G   | -- | -- | RNA    | SNP | 0.286 | 25 | 10 |
| --                 | chr7 | 30676545 | A   | G   | -- | -- | IGR    | SNP | 0.130 | 20 | 3  |
| --                 | chr7 | 31030224 | C   | A   | -- | -- | IGR    | SNP | 0.296 | 38 | 16 |
| --                 | chr7 | 31179110 | A   | T   | -- | -- | IGR    | SNP | 0.370 | 17 | 10 |
| --                 | chr7 | 31186396 | C   | G   | -- | -- | IGR    | SNP | 0.258 | 46 | 16 |
| --                 | chr7 | 31348747 | G   | A   | -- | -- | IGR    | SNP | 0.311 | 31 | 14 |
| --                 | chr7 | 31443270 | T   | G   | -- | -- | IGR    | SNP | 0.310 | 29 | 13 |
| --                 | chr7 | 31522997 | G   | T   | -- | -- | IGR    | SNP | 0.174 | 38 | 8  |
| <i>CCDC129</i>     | chr7 | 31661490 | -   | GAC | -- | -- | Intron | INS | 0.133 | 13 | 2  |
| <i>PDE1C</i>       | chr7 | 31990051 | G   | A   | -- | -- | Intron | SNP | 0.477 | 23 | 21 |
| <i>PDE1C</i>       | chr7 | 32001747 | A   | G   | -- | -- | Intron | SNP | 0.225 | 31 | 9  |
| <i>PDE1C</i>       | chr7 | 32002305 | A   | G   | -- | -- | Intron | SNP | 0.357 | 36 | 20 |
| <i>PDE1C</i>       | chr7 | 32025935 | G   | A   | -- | -- | Intron | SNP | 0.628 | 16 | 27 |
| <i>PDE1C</i>       | chr7 | 32161585 | C   | A   | -- | -- | Intron | SNP | 0.302 | 30 | 13 |
| <i>BBS9</i>        | chr7 | 33213024 | C   | G   | -- | -- | Intron | SNP | 0.733 | 8  | 22 |
| <i>BBS9</i>        | chr7 | 33272525 | A   | G   | -- | -- | Intron | SNP | 0.600 | 16 | 24 |

|           |      |          |      |       |    |    |         |     |       |    |    |
|-----------|------|----------|------|-------|----|----|---------|-----|-------|----|----|
| --        | chr7 | 33792557 | -    | TC    | -- | -- | IGR     | INS | 0.133 | 13 | 2  |
| --        | chr7 | 33792744 | -    | TG    | -- | -- | IGR     | INS | 0.172 | 24 | 5  |
| --        | chr7 | 33866412 | G    | T     | -- | -- | IGR     | SNP | 0.174 | 19 | 4  |
| --        | chr7 | 33866440 | C    | T     | -- | -- | IGR     | SNP | 0.150 | 17 | 3  |
| BMPER     | chr7 | 34128100 | G    | A     | -- | -- | Intron  | SNP | 0.270 | 46 | 17 |
| BMPER     | chr7 | 34175775 | G    | C     | -- | -- | Intron  | SNP | 0.149 | 40 | 7  |
| --        | chr7 | 34214667 | -    | GAGGC | -- | -- | IGR     | INS | 0.111 | 16 | 2  |
| --        | chr7 | 34338660 | G    | A     | -- | -- | IGR     | SNP | 0.316 | 39 | 18 |
| AAA1      | chr7 | 34430138 | C    | T     | -- | -- | RNA     | SNP | 0.394 | 20 | 13 |
| AAA1      | chr7 | 34669911 | G    | A     | -- | -- | RNA     | SNP | 0.667 | 1  | 2  |
| AAA1      | chr7 | 34717821 | T    | A     | -- | -- | RNA     | SNP | 0.143 | 18 | 3  |
| DPY19L1   | chr7 | 35048442 | T    | C     | -- | -- | Intron  | SNP | 0.133 | 26 | 4  |
| DPY19L1   | chr7 | 35048453 | C    | T     | -- | -- | Intron  | SNP | 0.133 | 26 | 4  |
| DPY19L1   | chr7 | 35048465 | T    | C     | -- | -- | Intron  | SNP | 0.121 | 29 | 4  |
| --        | chr7 | 35084382 | C    | T     | -- | -- | IGR     | SNP | 0.100 | 54 | 6  |
| DPY19L2P1 | chr7 | 35128549 | T    | G     | -- | -- | 3'Flank | SNP | 0.211 | 15 | 4  |
| DPY19L2P1 | chr7 | 35128599 | TA   | -     | -- | -- | 3'Flank | DEL | 0.143 | 24 | 4  |
| DPY19L2P1 | chr7 | 35138735 | T    | C     | -- | -- | RNA     | SNP | 0.122 | 36 | 5  |
| DPY19L2P1 | chr7 | 35138746 | C    | T     | -- | -- | RNA     | SNP | 0.125 | 35 | 5  |
| --        | chr7 | 35173927 | -    | ATAAC | -- | -- | IGR     | INS | 0.120 | 22 | 3  |
| --        | chr7 | 35236811 | C    | A     | -- | -- | IGR     | SNP | 0.146 | 35 | 6  |
| LOC401324 | chr7 | 35358372 | T    | G     | -- | -- | RNA     | SNP | 0.250 | 9  | 3  |
| HERPUD2   | chr7 | 35703272 | -    | TTC   | -- | -- | Intron  | INS | 0.125 | 35 | 5  |
| --        | chr7 | 35800885 | A    | T     | -- | -- | IGR     | SNP | 0.116 | 38 | 5  |
| --        | chr7 | 36162280 | TCG  | -     | -- | -- | IGR     | DEL | 0.111 | 24 | 3  |
| --        | chr7 | 36345552 | G    | A     | -- | -- | IGR     | SNP | 0.305 | 41 | 18 |
| --        | chr7 | 36535217 | A    | T     | -- | -- | IGR     | SNP | 0.179 | 23 | 5  |
| AOAH      | chr7 | 36554751 | C    | A     | -- | -- | Intron  | SNP | 0.100 | 36 | 4  |
| AOAH      | chr7 | 36579777 | T    | A     | -- | -- | Intron  | SNP | 0.339 | 37 | 19 |
| AOAH      | chr7 | 36701324 | C    | G     | -- | -- | Intron  | SNP | 0.561 | 18 | 23 |
| AOAH      | chr7 | 36718207 | C    | T     | -- | -- | Intron  | SNP | 0.143 | 24 | 4  |
| ELMO1     | chr7 | 37047343 | C    | T     | -- | -- | Intron  | SNP | 0.227 | 34 | 10 |
| ELMO1     | chr7 | 37047345 | A    | T     | -- | -- | Intron  | SNP | 0.222 | 35 | 10 |
| ELMO1     | chr7 | 37078737 | T    | A     | -- | -- | Intron  | SNP | 0.308 | 27 | 12 |
| ELMO1     | chr7 | 37304744 | T    | G     | -- | -- | Intron  | SNP | 0.596 | 23 | 34 |
| --        | chr7 | 37636740 | G    | C     | -- | -- | IGR     | SNP | 0.204 | 39 | 10 |
| --        | chr7 | 37778304 | A    | T     | -- | -- | IGR     | SNP | 0.226 | 24 | 7  |
| --        | chr7 | 38022709 | C    | T     | -- | -- | IGR     | SNP | 0.404 | 34 | 23 |
| --        | chr7 | 38086830 | C    | T     | -- | -- | IGR     | SNP | 0.100 | 27 | 3  |
| --        | chr7 | 38316721 | C    | T     | -- | -- | IGR     | SNP | 0.326 | 31 | 15 |
| AMPH      | chr7 | 38556247 | C    | A     | -- | -- | Intron  | SNP | 0.600 | 18 | 27 |
| --        | chr7 | 38741095 | G    | A     | -- | -- | IGR     | SNP | 0.194 | 29 | 7  |
| POU6F2    | chr7 | 39157560 | G    | A     | -- | -- | Intron  | SNP | 0.386 | 27 | 17 |
| POU6F2    | chr7 | 39228671 | G    | A     | -- | -- | Intron  | SNP | 0.587 | 26 | 37 |
| POU6F2    | chr7 | 39329845 | T    | G     | -- | -- | Intron  | SNP | 0.645 | 11 | 20 |
| POU6F2    | chr7 | 39345781 | A    | T     | -- | -- | Intron  | SNP | 0.212 | 41 | 11 |
| --        | chr7 | 39591392 | GAA  | -     | -- | -- | IGR     | DEL | 0.103 | 26 | 3  |
| RALA      | chr7 | 39687172 | G    | A     | -- | -- | Intron  | SNP | 0.262 | 31 | 11 |
| RALA      | chr7 | 39687197 | G    | C     | -- | -- | Intron  | SNP | 0.262 | 31 | 11 |
| RALA      | chr7 | 39687402 | G    | A     | -- | -- | Intron  | SNP | 0.209 | 34 | 9  |
| RALA      | chr7 | 39687851 | G    | C     | -- | -- | Intron  | SNP | 0.432 | 25 | 19 |
| RALA      | chr7 | 39738751 | G    | T     | -- | -- | Intron  | SNP | 0.200 | 16 | 4  |
| --        | chr7 | 39750313 | G    | C     | -- | -- | IGR     | SNP | 0.228 | 44 | 13 |
| LINC00265 | chr7 | 39834049 | C    | T     | -- | -- | RNA     | SNP | 0.133 | 26 | 4  |
| LINC00265 | chr7 | 39834050 | T    | G     | -- | -- | RNA     | SNP | 0.133 | 26 | 4  |
| --        | chr7 | 39904050 | C    | T     | -- | -- | IGR     | SNP | 0.211 | 15 | 4  |
| --        | chr7 | 39906467 | T    | C     | -- | -- | IGR     | SNP | 0.115 | 23 | 3  |
| --        | chr7 | 39976569 | T    | A     | -- | -- | IGR     | SNP | 0.288 | 42 | 17 |
| CDK13     | chr7 | 40136174 | CTTA | -     | -- | -- | 3'UTR   | DEL | 0.306 | 25 | 11 |
| C7orf10   | chr7 | 40256121 | G    | A     | -- | -- | Intron  | SNP | 0.211 | 15 | 4  |
| C7orf10   | chr7 | 40332689 | T    | A     | -- | -- | Intron  | SNP | 0.311 | 31 | 14 |
| C7orf10   | chr7 | 40439131 | C    | T     | -- | -- | Intron  | SNP | 0.610 | 16 | 25 |
| C7orf10   | chr7 | 40498868 | G    | A     | -- | -- | Intron  | SNP | 0.457 | 19 | 16 |
| C7orf10   | chr7 | 40645460 | -    | GGT   | -- | -- | Intron  | INS | 0.250 | 39 | 13 |
| C7orf10   | chr7 | 40662151 | C    | T     | -- | -- | Intron  | SNP | 0.182 | 18 | 4  |
| C7orf10   | chr7 | 40856168 | C    | A     | -- | -- | Intron  | SNP | 0.182 | 36 | 8  |
| C7orf10   | chr7 | 40856169 | T    | C     | -- | -- | Intron  | SNP | 0.163 | 36 | 7  |
| --        | chr7 | 40918412 | G    | T     | -- | -- | IGR     | SNP | 0.200 | 16 | 4  |
| --        | chr7 | 40989179 | -    | TG    | -- | -- | IGR     | INS | 0.105 | 17 | 2  |
| --        | chr7 | 41007908 | T    | G     | -- | -- | IGR     | SNP | 0.260 | 37 | 13 |
| --        | chr7 | 41455051 | G    | A     | -- | -- | IGR     | SNP | 0.600 | 18 | 27 |
| --        | chr7 | 41458353 | C    | A     | -- | -- | IGR     | SNP | 0.269 | 38 | 14 |
| LOC285954 | chr7 | 41770693 | -    | TA    | -- | -- | RNA     | INS | 0.120 | 22 | 3  |
| GLI3      | chr7 | 42086304 | C    | A     | -- | -- | Intron  | SNP | 0.297 | 26 | 11 |
| GLI3      | chr7 | 42140565 | C    | T     | -- | -- | Intron  | SNP | 0.439 | 23 | 18 |
| GLI3      | chr7 | 42142873 | A    | C     | -- | -- | Intron  | SNP | 0.356 | 29 | 16 |
| --        | chr7 | 42399934 | G    | A     | -- | -- | IGR     | SNP | 0.244 | 31 | 10 |
| --        | chr7 | 42623907 | T    | C     | -- | -- | IGR     | SNP | 0.231 | 10 | 3  |
| --        | chr7 | 42912553 | T    | C     | -- | -- | IGR     | SNP | 0.150 | 17 | 3  |
| --        | chr7 | 43051095 | A    | C     | -- | -- | IGR     | SNP | 0.115 | 46 | 6  |

|          |      |          |            |       |        |       |        |     |       |    |    |
|----------|------|----------|------------|-------|--------|-------|--------|-----|-------|----|----|
| --       | chr7 | 43854208 | A          | G     | --     | --    | IGR    | SNP | 0.133 | 39 | 6  |
| POLR2J4  | chr7 | 44005365 | CA         | -     | --     | --    | RNA    | DEL | 0.154 | 33 | 6  |
| POLR2J4  | chr7 | 44025247 | T          | C     | --     | --    | RNA    | SNP | 0.417 | 7  | 5  |
| SPDYE1   | chr7 | 44048441 | GGGAGGGGC- | --    | --     | --    | RNA    | DEL | 0.125 | 21 | 3  |
| CAMK2B   | chr7 | 44269018 | A          | G     | T1308C | S436S | Silent | SNP | 0.400 | 21 | 14 |
| CAMK2B   | chr7 | 44294304 | C          | T     | --     | --    | Intron | SNP | 0.574 | 23 | 31 |
| CAMK2B   | chr7 | 44360712 | G          | C     | --     | --    | Intron | SNP | 0.233 | 33 | 10 |
| CCM2     | chr7 | 45087137 | G          | A     | --     | --    | Intron | SNP | 0.179 | 46 | 10 |
| --       | chr7 | 45277011 | T          | A     | --     | --    | IGR    | SNP | 0.697 | 10 | 23 |
| --       | chr7 | 45475244 | C          | T     | --     | --    | IGR    | SNP | 0.583 | 15 | 21 |
| SEPT7P2  | chr7 | 45797954 | -          | TATTC | --     | --    | RNA    | INS | 0.132 | 33 | 5  |
| SEPT7P2  | chr7 | 45798025 | C          | T     | --     | --    | RNA    | SNP | 0.226 | 24 | 7  |
| SEPT7P2  | chr7 | 45798034 | G          | T     | --     | --    | RNA    | SNP | 0.214 | 22 | 6  |
| --       | chr7 | 46133131 | T          | G     | --     | --    | IGR    | SNP | 0.108 | 33 | 4  |
| --       | chr7 | 46368181 | A          | T     | --     | --    | IGR    | SNP | 0.120 | 22 | 3  |
| --       | chr7 | 46475438 | G          | A     | --     | --    | IGR    | SNP | 0.318 | 30 | 14 |
| --       | chr7 | 47071335 | C          | A     | --     | --    | IGR    | SNP | 0.196 | 37 | 9  |
| --       | chr7 | 47285103 | C          | A     | --     | --    | IGR    | SNP | 0.167 | 25 | 5  |
| --       | chr7 | 47307455 | C          | A     | --     | --    | IGR    | SNP | 0.118 | 30 | 4  |
| TNS3     | chr7 | 47396278 | G          | A     | --     | --    | Intron | SNP | 0.103 | 35 | 4  |
| TNS3     | chr7 | 47611549 | C          | G     | --     | --    | Intron | SNP | 0.625 | 24 | 40 |
| SUN3     | chr7 | 48034557 | T          | G     | --     | --    | Intron | SNP | 0.143 | 24 | 4  |
| SUN3     | chr7 | 48034558 | G          | A     | --     | --    | Intron | SNP | 0.111 | 24 | 3  |
| --       | chr7 | 48072693 | G          | T     | --     | --    | IGR    | SNP | 0.244 | 31 | 10 |
| --       | chr7 | 48167828 | TC         | -     | --     | --    | IGR    | DEL | 0.111 | 24 | 3  |
| ABCA13   | chr7 | 48242357 | C          | T     | --     | --    | Intron | SNP | 0.300 | 7  | 3  |
| ABCA13   | chr7 | 48455654 | C          | G     | --     | --    | Intron | SNP | 0.564 | 17 | 22 |
| ABCA13   | chr7 | 48510054 | A          | T     | --     | --    | Intron | SNP | 0.348 | 15 | 8  |
| --       | chr7 | 48884577 | C          | A     | --     | --    | IGR    | SNP | 0.625 | 18 | 30 |
| --       | chr7 | 48900730 | G          | T     | --     | --    | IGR    | SNP | 0.233 | 56 | 17 |
| --       | chr7 | 49402068 | G          | T     | --     | --    | IGR    | SNP | 0.364 | 7  | 4  |
| --       | chr7 | 49423944 | C          | A     | --     | --    | IGR    | SNP | 0.310 | 29 | 13 |
| --       | chr7 | 49527637 | C          | A     | --     | --    | IGR    | SNP | 0.564 | 17 | 22 |
| --       | chr7 | 49578043 | A          | G     | --     | --    | IGR    | SNP | 0.257 | 26 | 9  |
| --       | chr7 | 49583338 | C          | A     | --     | --    | IGR    | SNP | 0.235 | 26 | 8  |
| --       | chr7 | 49597990 | A          | T     | --     | --    | IGR    | SNP | 0.717 | 13 | 33 |
| --       | chr7 | 49654053 | C          | T     | --     | --    | IGR    | SNP | 0.575 | 17 | 23 |
| --       | chr7 | 49787910 | C          | G     | --     | --    | IGR    | SNP | 0.574 | 23 | 31 |
| ZBPB     | chr7 | 50037694 | A          | T     | --     | --    | Intron | SNP | 0.217 | 36 | 10 |
| --       | chr7 | 50246199 | G          | C     | --     | --    | IGR    | SNP | 0.393 | 34 | 22 |
| --       | chr7 | 50256291 | C          | T     | --     | --    | IGR    | SNP | 0.231 | 50 | 15 |
| DDC      | chr7 | 50526996 | G          | A     | --     | --    | Intron | SNP | 0.190 | 17 | 4  |
| DDC      | chr7 | 50543076 | C          | A     | --     | --    | Intron | SNP | 0.359 | 25 | 14 |
| GRB10    | chr7 | 50728604 | C          | A     | --     | --    | Intron | SNP | 0.183 | 49 | 11 |
| GRB10    | chr7 | 50756789 | C          | A     | --     | --    | Intron | SNP | 0.542 | 22 | 26 |
| --       | chr7 | 50967001 | T          | C     | --     | --    | IGR    | SNP | 0.417 | 7  | 5  |
| --       | chr7 | 50967023 | A          | G     | --     | --    | IGR    | SNP | 0.556 | 4  | 5  |
| --       | chr7 | 51462950 | A          | G     | --     | --    | IGR    | SNP | 0.200 | 16 | 4  |
| --       | chr7 | 51588112 | T          | A     | --     | --    | IGR    | SNP | 0.434 | 30 | 23 |
| --       | chr7 | 51781333 | A          | T     | --     | --    | IGR    | SNP | 0.200 | 28 | 7  |
| --       | chr7 | 52057562 | CT         | -     | --     | --    | IGR    | DEL | 0.581 | 18 | 25 |
| --       | chr7 | 52063909 | C          | T     | --     | --    | IGR    | SNP | 0.564 | 24 | 31 |
| --       | chr7 | 52123256 | C          | A     | --     | --    | IGR    | SNP | 0.237 | 29 | 9  |
| --       | chr7 | 52192884 | T          | C     | --     | --    | IGR    | SNP | 0.600 | 18 | 27 |
| --       | chr7 | 52227265 | A          | T     | --     | --    | IGR    | SNP | 0.125 | 21 | 3  |
| --       | chr7 | 52308282 | A          | T     | --     | --    | IGR    | SNP | 0.217 | 36 | 10 |
| --       | chr7 | 52434298 | G          | C     | --     | --    | IGR    | SNP | 0.190 | 17 | 4  |
| --       | chr7 | 52636025 | G          | T     | --     | --    | IGR    | SNP | 0.338 | 49 | 25 |
| --       | chr7 | 52661410 | G          | T     | --     | --    | IGR    | SNP | 0.316 | 39 | 18 |
| --       | chr7 | 53004174 | T          | A     | --     | --    | IGR    | SNP | 0.119 | 37 | 5  |
| --       | chr7 | 53194889 | A          | G     | --     | --    | IGR    | SNP | 0.100 | 36 | 4  |
| --       | chr7 | 53236335 | A          | G     | --     | --    | IGR    | SNP | 0.113 | 47 | 6  |
| --       | chr7 | 53302679 | C          | A     | --     | --    | IGR    | SNP | 0.481 | 28 | 26 |
| --       | chr7 | 53605755 | G          | A     | --     | --    | IGR    | SNP | 0.400 | 30 | 20 |
| --       | chr7 | 53618862 | T          | C     | --     | --    | IGR    | SNP | 0.313 | 22 | 10 |
| --       | chr7 | 53666658 | G          | A     | --     | --    | IGR    | SNP | 0.265 | 36 | 13 |
| FLJ45974 | chr7 | 53726101 | T          | A     | --     | --    | RNA    | SNP | 0.121 | 29 | 4  |
| FLJ45974 | chr7 | 53752410 | G          | C     | --     | --    | RNA    | SNP | 0.456 | 31 | 26 |
| FLJ45974 | chr7 | 53817630 | T          | G     | --     | --    | RNA    | SNP | 0.204 | 39 | 10 |
| --       | chr7 | 53981343 | G          | A     | --     | --    | IGR    | SNP | 0.214 | 33 | 9  |
| --       | chr7 | 54397660 | C          | G     | --     | --    | IGR    | SNP | 0.431 | 37 | 28 |
| --       | chr7 | 54553062 | A          | T     | --     | --    | IGR    | SNP | 0.179 | 46 | 10 |
| --       | chr7 | 54588720 | G          | A     | --     | --    | IGR    | SNP | 0.136 | 38 | 6  |
| --       | chr7 | 54601229 | A          | G     | --     | --    | IGR    | SNP | 0.462 | 21 | 18 |
| --       | chr7 | 54866319 | T          | G     | --     | --    | IGR    | SNP | 0.245 | 37 | 12 |
| --       | chr7 | 54968246 | C          | T     | --     | --    | IGR    | SNP | 0.214 | 22 | 6  |
| --       | chr7 | 55054966 | C          | T     | --     | --    | IGR    | SNP | 0.216 | 29 | 8  |
| EGFR     | chr7 | 55161849 | C          | G     | --     | --    | Intron | SNP | 0.565 | 30 | 39 |
| EGFR     | chr7 | 55203022 | A          | T     | --     | --    | Intron | SNP | 0.152 | 56 | 10 |
| LANCL2   | chr7 | 55441807 | C          | T     | --     | --    | Intron | SNP | 0.250 | 30 | 10 |

|              |      |          |    |      |    |    |         |     |       |    |    |
|--------------|------|----------|----|------|----|----|---------|-----|-------|----|----|
| VOPP1        | chr7 | 55556332 | G  | A    | -- | -- | Intron  | SNP | 0.422 | 26 | 19 |
| --           | chr7 | 55745169 | -  | ATG  | -- | -- | IGR     | INS | 0.150 | 16 | 3  |
| --           | chr7 | 55818730 | G  | A    | -- | -- | IGR     | SNP | 0.377 | 33 | 20 |
| --           | chr7 | 55845545 | A  | G    | -- | -- | IGR     | SNP | 0.605 | 17 | 26 |
| --           | chr7 | 56404512 | G  | C    | -- | -- | IGR     | SNP | 0.108 | 33 | 4  |
| --           | chr7 | 56404513 | G  | T    | -- | -- | IGR     | SNP | 0.132 | 33 | 5  |
| --           | chr7 | 56431835 | C  | T    | -- | -- | IGR     | SNP | 0.143 | 24 | 4  |
| --           | chr7 | 56520620 | T  | G    | -- | -- | IGR     | SNP | 0.188 | 13 | 3  |
| --           | chr7 | 56607367 | T  | A    | -- | -- | IGR     | SNP | 0.264 | 53 | 19 |
| --           | chr7 | 56609625 | T  | C    | -- | -- | IGR     | SNP | 0.242 | 50 | 16 |
| --           | chr7 | 56645330 | T  | C    | -- | -- | IGR     | SNP | 0.113 | 47 | 6  |
| --           | chr7 | 56728186 | G  | A    | -- | -- | IGR     | SNP | 0.229 | 54 | 16 |
| --           | chr7 | 56882008 | C  | T    | -- | -- | IGR     | SNP | 0.106 | 42 | 5  |
| --           | chr7 | 56890031 | G  | C    | -- | -- | IGR     | SNP | 0.133 | 26 | 4  |
| --           | chr7 | 56974038 | C  | T    | -- | -- | IGR     | SNP | 0.429 | 20 | 15 |
| MIR4283-1,MI | chr7 | 57022729 | -  | CATA | -- | -- | 3'Flank | INS | 0.118 | 15 | 2  |
| --           | chr7 | 57167555 | A  | G    | -- | -- | IGR     | SNP | 0.137 | 44 | 7  |
| --           | chr7 | 57171820 | G  | C    | -- | -- | IGR     | SNP | 0.160 | 21 | 4  |
| GUSBP10      | chr7 | 57240347 | G  | T    | -- | -- | RNA     | SNP | 0.250 | 45 | 15 |
| --           | chr7 | 57345390 | A  | C    | -- | -- | IGR     | SNP | 0.585 | 22 | 31 |
| --           | chr7 | 57421470 | G  | C    | -- | -- | IGR     | SNP | 0.358 | 43 | 24 |
| --           | chr7 | 57624730 | G  | A    | -- | -- | IGR     | SNP | 0.131 | 53 | 8  |
| --           | chr7 | 57642816 | A  | T    | -- | -- | IGR     | SNP | 0.106 | 42 | 5  |
| --           | chr7 | 57740836 | T  | A    | -- | -- | IGR     | SNP | 0.167 | 30 | 6  |
| --           | chr7 | 57740843 | G  | A    | -- | -- | IGR     | SNP | 0.139 | 31 | 5  |
| --           | chr7 | 57752101 | A  | G    | -- | -- | IGR     | SNP | 0.118 | 60 | 8  |
| --           | chr7 | 57752104 | A  | G    | -- | -- | IGR     | SNP | 0.116 | 61 | 8  |
| --           | chr7 | 57785288 | C  | A    | -- | -- | IGR     | SNP | 0.170 | 39 | 8  |
| --           | chr7 | 57811369 | G  | A    | -- | -- | IGR     | SNP | 0.333 | 32 | 16 |
| --           | chr7 | 57811590 | A  | G    | -- | -- | IGR     | SNP | 0.188 | 39 | 9  |
| --           | chr7 | 57811599 | C  | T    | -- | -- | IGR     | SNP | 0.196 | 37 | 9  |
| --           | chr7 | 57814004 | C  | T    | -- | -- | IGR     | SNP | 0.227 | 17 | 5  |
| --           | chr7 | 57817793 | G  | A    | -- | -- | IGR     | SNP | 0.400 | 27 | 18 |
| --           | chr7 | 57826034 | T  | G    | -- | -- | IGR     | SNP | 0.281 | 23 | 9  |
| --           | chr7 | 57828200 | A  | G    | -- | -- | IGR     | SNP | 0.146 | 41 | 7  |
| --           | chr7 | 57828214 | C  | T    | -- | -- | IGR     | SNP | 0.125 | 42 | 6  |
| --           | chr7 | 57856185 | G  | C    | -- | -- | IGR     | SNP | 0.393 | 17 | 11 |
| --           | chr7 | 57856186 | G  | T    | -- | -- | IGR     | SNP | 0.393 | 17 | 11 |
| --           | chr7 | 57862795 | A  | T    | -- | -- | IGR     | SNP | 0.136 | 51 | 8  |
| --           | chr7 | 57870558 | A  | G    | -- | -- | IGR     | SNP | 0.108 | 33 | 4  |
| --           | chr7 | 57916896 | T  | G    | -- | -- | IGR     | SNP | 0.133 | 65 | 10 |
| --           | chr7 | 57917432 | A  | C    | -- | -- | IGR     | SNP | 0.100 | 45 | 5  |
| --           | chr7 | 57921121 | T  | C    | -- | -- | IGR     | SNP | 0.136 | 38 | 6  |
| --           | chr7 | 57921335 | T  | C    | -- | -- | IGR     | SNP | 0.102 | 44 | 5  |
| --           | chr7 | 57921351 | G  | C    | -- | -- | IGR     | SNP | 0.154 | 33 | 6  |
| --           | chr7 | 57925803 | C  | G    | -- | -- | IGR     | SNP | 0.158 | 48 | 9  |
| --           | chr7 | 57926018 | A  | T    | -- | -- | IGR     | SNP | 0.130 | 40 | 6  |
| --           | chr7 | 57926023 | A  | C    | -- | -- | IGR     | SNP | 0.125 | 42 | 6  |
| --           | chr7 | 57937974 | TC | -    | -- | -- | IGR     | DEL | 0.109 | 41 | 5  |
| --           | chr7 | 61065803 | T  | G    | -- | -- | IGR     | SNP | 0.129 | 27 | 4  |
| --           | chr7 | 61198065 | T  | G    | -- | -- | IGR     | SNP | 0.137 | 44 | 7  |
| --           | chr7 | 61198180 | C  | T    | -- | -- | IGR     | SNP | 0.125 | 35 | 5  |
| --           | chr7 | 61240170 | T  | C    | -- | -- | IGR     | SNP | 0.115 | 46 | 6  |
| --           | chr7 | 61243392 | G  | A    | -- | -- | IGR     | SNP | 0.122 | 43 | 6  |
| --           | chr7 | 61244232 | T  | G    | -- | -- | IGR     | SNP | 0.226 | 24 | 7  |
| --           | chr7 | 61287784 | T  | A    | -- | -- | IGR     | SNP | 0.175 | 47 | 10 |
| --           | chr7 | 61554716 | G  | A    | -- | -- | IGR     | SNP | 0.119 | 74 | 10 |
| --           | chr7 | 61558459 | G  | T    | -- | -- | IGR     | SNP | 0.308 | 63 | 28 |
| --           | chr7 | 61771473 | G  | A    | -- | -- | IGR     | SNP | 0.500 | 4  | 4  |
| --           | chr7 | 61776902 | T  | C    | -- | -- | IGR     | SNP | 0.127 | 48 | 7  |
| --           | chr7 | 61777115 | A  | G    | -- | -- | IGR     | SNP | 0.273 | 16 | 6  |
| --           | chr7 | 61777116 | T  | C    | -- | -- | IGR     | SNP | 0.273 | 16 | 6  |
| --           | chr7 | 61813570 | -  | AT   | -- | -- | IGR     | INS | 0.105 | 17 | 2  |
| --           | chr7 | 61829939 | C  | T    | -- | -- | IGR     | SNP | 0.179 | 23 | 5  |
| --           | chr7 | 61829987 | G  | C    | -- | -- | IGR     | SNP | 0.156 | 27 | 5  |
| --           | chr7 | 61830562 | A  | T    | -- | -- | IGR     | SNP | 0.143 | 24 | 4  |
| --           | chr7 | 61843101 | A  | G    | -- | -- | IGR     | SNP | 0.111 | 24 | 3  |
| --           | chr7 | 61843964 | C  | T    | -- | -- | IGR     | SNP | 0.103 | 35 | 4  |
| --           | chr7 | 62049473 | C  | A    | -- | -- | IGR     | SNP | 0.186 | 35 | 8  |
| --           | chr7 | 62104155 | C  | A    | -- | -- | IGR     | SNP | 0.125 | 35 | 5  |
| --           | chr7 | 62184824 | G  | A    | -- | -- | IGR     | SNP | 0.440 | 28 | 22 |
| --           | chr7 | 62225573 | T  | A    | -- | -- | IGR     | SNP | 0.294 | 24 | 10 |
| --           | chr7 | 62304594 | A  | T    | -- | -- | IGR     | SNP | 0.257 | 26 | 9  |
| --           | chr7 | 62322581 | C  | A    | -- | -- | IGR     | SNP | 0.174 | 19 | 4  |
| --           | chr7 | 62342848 | T  | G    | -- | -- | IGR     | SNP | 0.419 | 25 | 18 |
| --           | chr7 | 62378029 | G  | A    | -- | -- | IGR     | SNP | 0.278 | 26 | 10 |
| --           | chr7 | 62410652 | T  | A    | -- | -- | IGR     | SNP | 0.308 | 9  | 4  |
| --           | chr7 | 62432795 | G  | T    | -- | -- | IGR     | SNP | 0.194 | 29 | 7  |
| --           | chr7 | 62632747 | T  | A    | -- | -- | IGR     | SNP | 0.556 | 4  | 5  |
| --           | chr7 | 62687362 | T  | C    | -- | -- | IGR     | SNP | 0.121 | 29 | 4  |

|            |      |          |        |       |    |    |        |     |       |    |    |
|------------|------|----------|--------|-------|----|----|--------|-----|-------|----|----|
| --         | chr7 | 62904453 | G      | A     | -- | -- | IGR    | SNP | 0.400 | 12 | 8  |
| --         | chr7 | 63033204 | G      | A     | -- | -- | IGR    | SNP | 0.167 | 15 | 3  |
| --         | chr7 | 63061588 | G      | C     | -- | -- | IGR    | SNP | 0.429 | 8  | 6  |
| --         | chr7 | 63092258 | C      | G     | -- | -- | IGR    | SNP | 0.533 | 7  | 8  |
| --         | chr7 | 63200555 | C      | T     | -- | -- | IGR    | SNP | 0.393 | 17 | 11 |
| --         | chr7 | 63209859 | C      | T     | -- | -- | IGR    | SNP | 0.563 | 7  | 9  |
| --         | chr7 | 63265942 | C      | T     | -- | -- | IGR    | SNP | 0.143 | 30 | 5  |
| --         | chr7 | 63304033 | -      | AAAAT | -- | -- | IGR    | INS | 0.106 | 42 | 5  |
| --         | chr7 | 63317351 | G      | A     | -- | -- | IGR    | SNP | 0.194 | 25 | 6  |
| --         | chr7 | 63356906 | G      | A     | -- | -- | IGR    | SNP | 0.118 | 30 | 4  |
| --         | chr7 | 63356961 | G      | A     | -- | -- | IGR    | SNP | 0.143 | 24 | 4  |
| --         | chr7 | 63386217 | T      | G     | -- | -- | IGR    | SNP | 0.375 | 10 | 6  |
| --         | chr7 | 63492718 | G      | C     | -- | -- | IGR    | SNP | 0.213 | 37 | 10 |
| --         | chr7 | 63503132 | AG     | -     | -- | -- | IGR    | DEL | 0.190 | 34 | 8  |
| ZNF727     | chr7 | 63521135 | T      | A     | -- | -- | Intron | SNP | 0.176 | 28 | 6  |
| --         | chr7 | 63657663 | G      | T     | -- | -- | IGR    | SNP | 0.357 | 27 | 15 |
| ZNF679     | chr7 | 63689371 | T      | C     | -- | -- | Intron | SNP | 0.110 | 73 | 9  |
| ZNF679     | chr7 | 63718501 | A      | G     | -- | -- | Intron | SNP | 0.452 | 23 | 19 |
| --         | chr7 | 63847719 | C      | T     | -- | -- | IGR    | SNP | 0.525 | 19 | 21 |
| --         | chr7 | 63913686 | G      | C     | -- | -- | IGR    | SNP | 0.490 | 25 | 24 |
| --         | chr7 | 64096626 | C      | T     | -- | -- | IGR    | SNP | 0.628 | 16 | 27 |
| --         | chr7 | 64173851 | A      | T     | -- | -- | IGR    | SNP | 0.227 | 34 | 10 |
| SEPHS1P    | chr7 | 64313356 | C      | G     | -- | -- | RNA    | SNP | 0.291 | 39 | 16 |
| ZNF273     | chr7 | 64366643 | G      | C     | -- | -- | Intron | SNP | 0.371 | 22 | 13 |
| --         | chr7 | 64550620 | ATAT   | -     | -- | -- | IGR    | DEL | 0.103 | 26 | 3  |
| --         | chr7 | 64558364 | G      | A     | -- | -- | IGR    | SNP | 0.162 | 31 | 6  |
| --         | chr7 | 64558552 | AGTT   | -     | -- | -- | IGR    | DEL | 0.133 | 39 | 6  |
| --         | chr7 | 64574766 | A      | G     | -- | -- | IGR    | SNP | 0.174 | 19 | 4  |
| INTS4L1    | chr7 | 64608678 | G      | T     | -- | -- | RNA    | SNP | 0.267 | 11 | 4  |
| INTS4L1    | chr7 | 64608701 | T      | C     | -- | -- | RNA    | SNP | 0.267 | 11 | 4  |
| INTS4L1    | chr7 | 64690234 | C      | T     | -- | -- | RNA    | SNP | 0.583 | 20 | 28 |
| --         | chr7 | 64700134 | G      | T     | -- | -- | IGR    | SNP | 0.364 | 28 | 16 |
| --         | chr7 | 64822779 | G      | C     | -- | -- | IGR    | SNP | 0.370 | 17 | 10 |
| --         | chr7 | 64961769 | A      | G     | -- | -- | IGR    | SNP | 0.143 | 30 | 5  |
| --         | chr7 | 65028264 | A      | T     | -- | -- | IGR    | SNP | 0.116 | 76 | 10 |
| --         | chr7 | 65047637 | CTT    | -     | -- | -- | IGR    | DEL | 0.125 | 35 | 5  |
| LOC441242  | chr7 | 65191328 | C      | T     | -- | -- | RNA    | SNP | 0.111 | 56 | 7  |
| CCT6P1,LOC | chr7 | 65226263 | G      | T     | -- | -- | RNA    | SNP | 0.192 | 21 | 5  |
| --         | chr7 | 65296272 | G      | A     | -- | -- | IGR    | SNP | 0.429 | 28 | 21 |
| --         | chr7 | 65657258 | T      | A     | -- | -- | IGR    | SNP | 0.200 | 32 | 8  |
| TPST1      | chr7 | 65783147 | AAAAAT | -     | -- | -- | Intron | DEL | 0.463 | 22 | 19 |
| LINC00174  | chr7 | 65858003 | G      | A     | -- | -- | RNA    | SNP | 0.333 | 8  | 4  |
| --         | chr7 | 65896488 | C      | A     | -- | -- | IGR    | SNP | 0.267 | 11 | 4  |
| --         | chr7 | 66185530 | G      | T     | -- | -- | IGR    | SNP | 0.161 | 26 | 5  |
| C7orf42    | chr7 | 66391558 | G      | A     | -- | -- | Intron | SNP | 0.407 | 32 | 22 |
| TYW1       | chr7 | 66513100 | C      | G     | -- | -- | Intron | SNP | 0.450 | 11 | 9  |
| TYW1       | chr7 | 66663103 | T      | G     | -- | -- | Intron | SNP | 0.414 | 17 | 12 |
| --         | chr7 | 66741109 | C      | T     | -- | -- | IGR    | SNP | 0.118 | 30 | 4  |
| --         | chr7 | 66750437 | G      | A     | -- | -- | IGR    | SNP | 0.139 | 31 | 5  |
| --         | chr7 | 66943611 | A      | T     | -- | -- | IGR    | SNP | 0.194 | 29 | 7  |
| --         | chr7 | 66949466 | G      | T     | -- | -- | IGR    | SNP | 0.214 | 11 | 3  |
| --         | chr7 | 67131764 | C      | G     | -- | -- | IGR    | SNP | 0.150 | 17 | 3  |
| --         | chr7 | 67144953 | G      | T     | -- | -- | IGR    | SNP | 0.111 | 40 | 5  |
| --         | chr7 | 67144954 | A      | T     | -- | -- | IGR    | SNP | 0.109 | 41 | 5  |
| --         | chr7 | 67261993 | T      | C     | -- | -- | IGR    | SNP | 0.294 | 24 | 10 |
| --         | chr7 | 67302376 | G      | A     | -- | -- | IGR    | SNP | 0.150 | 17 | 3  |
| --         | chr7 | 67455591 | G      | A     | -- | -- | IGR    | SNP | 0.170 | 39 | 8  |
| --         | chr7 | 67522140 | T      | A     | -- | -- | IGR    | SNP | 0.100 | 54 | 6  |
| --         | chr7 | 68142805 | T      | A     | -- | -- | IGR    | SNP | 0.409 | 13 | 9  |
| --         | chr7 | 68213002 | G      | T     | -- | -- | IGR    | SNP | 0.509 | 26 | 27 |
| --         | chr7 | 68281521 | G      | A     | -- | -- | IGR    | SNP | 0.587 | 19 | 27 |
| --         | chr7 | 68292926 | A      | T     | -- | -- | IGR    | SNP | 0.167 | 25 | 5  |
| --         | chr7 | 68733318 | A      | C     | -- | -- | IGR    | SNP | 0.484 | 32 | 30 |
| --         | chr7 | 68804405 | C      | T     | -- | -- | IGR    | SNP | 0.514 | 34 | 36 |
| --         | chr7 | 68930803 | T      | C     | -- | -- | IGR    | SNP | 0.289 | 27 | 11 |
| --         | chr7 | 68948583 | G      | A     | -- | -- | IGR    | SNP | 0.564 | 17 | 22 |
| --         | chr7 | 68978209 | CAT    | -     | -- | -- | IGR    | DEL | 0.125 | 14 | 2  |
| --         | chr7 | 69012527 | T      | G     | -- | -- | IGR    | SNP | 0.167 | 15 | 3  |
| --         | chr7 | 69030421 | CTTTA  | -     | -- | -- | IGR    | DEL | 0.355 | 20 | 11 |
| --         | chr7 | 69038915 | C      | T     | -- | -- | IGR    | SNP | 0.235 | 13 | 4  |
| AUTS2      | chr7 | 69103878 | G      | C     | -- | -- | Intron | SNP | 0.422 | 26 | 19 |
| AUTS2      | chr7 | 69160894 | G      | A     | -- | -- | Intron | SNP | 0.286 | 35 | 14 |
| AUTS2      | chr7 | 69382251 | T      | C     | -- | -- | Intron | SNP | 0.406 | 19 | 13 |
| AUTS2      | chr7 | 69495852 | C      | T     | -- | -- | Intron | SNP | 0.294 | 36 | 15 |
| AUTS2      | chr7 | 69572380 | A      | T     | -- | -- | Intron | SNP | 0.105 | 34 | 4  |
| AUTS2      | chr7 | 69646644 | T      | C     | -- | -- | Intron | SNP | 0.586 | 12 | 17 |
| AUTS2      | chr7 | 69693438 | C      | T     | -- | -- | Intron | SNP | 0.556 | 12 | 15 |
| AUTS2      | chr7 | 69708267 | A      | G     | -- | -- | Intron | SNP | 0.214 | 22 | 6  |
| AUTS2      | chr7 | 69768405 | C      | T     | -- | -- | Intron | SNP | 0.146 | 35 | 6  |
| AUTS2      | chr7 | 69807538 | G      | A     | -- | -- | Intron | SNP | 0.373 | 32 | 19 |

|             |      |          |        |    |    |    |         |     |       |    |    |
|-------------|------|----------|--------|----|----|----|---------|-----|-------|----|----|
| AUTS2       | chr7 | 69838700 | T      | A  | -- | -- | Intron  | SNP | 0.302 | 37 | 16 |
| AUTS2       | chr7 | 69961546 | A      | G  | -- | -- | Intron  | SNP | 0.145 | 71 | 12 |
| AUTS2       | chr7 | 69961566 | C      | T  | -- | -- | Intron  | SNP | 0.127 | 69 | 10 |
| --          | chr7 | 70465016 | T      | G  | -- | -- | IGR     | SNP | 0.628 | 16 | 27 |
| WBSCR17     | chr7 | 70853637 | C      | A  | -- | -- | Intron  | SNP | 0.711 | 11 | 27 |
| WBSCR17     | chr7 | 71077642 | A      | C  | -- | -- | Intron  | SNP | 0.471 | 27 | 24 |
| WBSCR17     | chr7 | 71096632 | C      | A  | -- | -- | Intron  | SNP | 0.257 | 26 | 9  |
| WBSCR17     | chr7 | 71152150 | G      | A  | -- | -- | Intron  | SNP | 0.346 | 34 | 18 |
| --          | chr7 | 71183485 | G      | A  | -- | -- | IGR     | SNP | 0.358 | 34 | 19 |
| CALN1       | chr7 | 71251041 | G      | A  | -- | -- | 3'UTR   | SNP | 0.324 | 25 | 12 |
| CALN1       | chr7 | 71433707 | A      | T  | -- | -- | Intron  | SNP | 0.184 | 31 | 7  |
| CALN1       | chr7 | 71476765 | G      | A  | -- | -- | Intron  | SNP | 0.486 | 19 | 18 |
| CALN1       | chr7 | 71762655 | C      | T  | -- | -- | Intron  | SNP | 0.500 | 24 | 24 |
| CALN1       | chr7 | 71798406 | G      | A  | -- | -- | Intron  | SNP | 0.254 | 47 | 16 |
| CALN1       | chr7 | 71817394 | C      | A  | -- | -- | Intron  | SNP | 0.286 | 10 | 4  |
| --          | chr7 | 71982774 | A      | C  | -- | -- | IGR     | SNP | 0.269 | 19 | 7  |
| TYW1B       | chr7 | 72073273 | TTCTTC | -  | -- | -- | Intron  | DEL | 0.122 | 36 | 5  |
| TYW1B       | chr7 | 72110645 | C      | T  | -- | -- | Intron  | SNP | 0.130 | 40 | 6  |
| TYW1B       | chr7 | 72167810 | G      | A  | -- | -- | Intron  | SNP | 0.100 | 27 | 3  |
| TYW1B       | chr7 | 72194060 | C      | T  | -- | -- | Intron  | SNP | 0.152 | 39 | 7  |
| TYW1B       | chr7 | 72208362 | C      | T  | -- | -- | Intron  | SNP | 0.136 | 38 | 6  |
| SBDSP1, TYW | chr7 | 72299428 | -      | TG | -- | -- | 5'Flank | INS | 0.105 | 17 | 2  |
| --          | chr7 | 72314572 | T      | A  | -- | -- | IGR     | SNP | 0.667 | 6  | 12 |
| POM121      | chr7 | 72373042 | A      | C  | -- | -- | Intron  | SNP | 0.158 | 16 | 3  |
| POM121      | chr7 | 72374387 | C      | T  | -- | -- | Intron  | SNP | 0.200 | 20 | 5  |
| --          | chr7 | 72697751 | G      | C  | -- | -- | IGR     | SNP | 0.125 | 21 | 3  |
| --          | chr7 | 72712097 | TCTC   | -  | -- | -- | IGR     | DEL | 0.118 | 15 | 2  |
| FKBP6       | chr7 | 72770074 | T      | A  | -- | -- | Intron  | SNP | 0.500 | 4  | 4  |
| --          | chr7 | 73001570 | G      | A  | -- | -- | IGR     | SNP | 0.327 | 37 | 18 |
| WBSCR22     | chr7 | 73098933 | T      | A  | -- | -- | Intron  | SNP | 0.267 | 11 | 4  |
| CLIP2       | chr7 | 73736793 | C      | A  | -- | -- | Intron  | SNP | 0.148 | 23 | 4  |
| CLIP2       | chr7 | 73739180 | G      | C  | -- | -- | Intron  | SNP | 0.429 | 12 | 9  |
| GTF2IRD1    | chr7 | 73893527 | C      | T  | -- | -- | Intron  | SNP | 0.538 | 12 | 14 |
| GTF2IRD1    | chr7 | 73903248 | G      | C  | -- | -- | Intron  | SNP | 0.393 | 17 | 11 |
| GTF2IRD1    | chr7 | 74002454 | G      | T  | -- | -- | Intron  | SNP | 0.125 | 21 | 3  |
| --          | chr7 | 74347505 | A      | G  | -- | -- | IGR     | SNP | 0.214 | 11 | 3  |
| GTF2IRD2B   | chr7 | 74537766 | G      | A  | -- | -- | Intron  | SNP | 0.150 | 17 | 3  |
| PMS2P3      | chr7 | 75154754 | G      | C  | -- | -- | RNA     | SNP | 0.143 | 18 | 3  |
| HIP1        | chr7 | 75207199 | C      | G  | -- | -- | Intron  | SNP | 0.105 | 51 | 6  |
| HIP1        | chr7 | 75276527 | T      | A  | -- | -- | Intron  | SNP | 0.273 | 8  | 3  |
| --          | chr7 | 75456807 | C      | A  | -- | -- | IGR     | SNP | 0.114 | 39 | 5  |
| SRRM3       | chr7 | 75873503 | C      | A  | -- | -- | Intron  | SNP | 0.295 | 43 | 18 |
| --          | chr7 | 75927330 | G      | C  | -- | -- | IGR     | SNP | 0.217 | 36 | 10 |
| --          | chr7 | 76079503 | A      | G  | -- | -- | IGR     | SNP | 0.167 | 15 | 3  |
| --          | chr7 | 76079523 | C      | G  | -- | -- | IGR     | SNP | 0.158 | 16 | 3  |
| DTX2        | chr7 | 76098841 | C      | T  | -- | -- | Intron  | SNP | 0.185 | 22 | 5  |
| DTX2        | chr7 | 76111454 | G      | A  | -- | -- | Intron  | SNP | 0.118 | 45 | 6  |
| --          | chr7 | 76169022 | A      | T  | -- | -- | IGR     | SNP | 0.346 | 17 | 9  |
| --          | chr7 | 76321986 | G      | A  | -- | -- | IGR     | SNP | 0.104 | 43 | 5  |
| --          | chr7 | 76415612 | AAT    | -  | -- | -- | IGR     | DEL | 0.105 | 17 | 2  |
| --          | chr7 | 76580489 | T      | C  | -- | -- | IGR     | SNP | 0.211 | 15 | 4  |
| --          | chr7 | 76582794 | C      | A  | -- | -- | IGR     | SNP | 0.293 | 41 | 17 |
| LOC1001328  | chr7 | 76680552 | A      | G  | -- | -- | RNA     | SNP | 0.167 | 20 | 4  |
| PION        | chr7 | 76945334 | G      | A  | -- | -- | Intron  | SNP | 0.370 | 34 | 20 |
| --          | chr7 | 77307110 | C      | G  | -- | -- | IGR     | SNP | 0.529 | 24 | 27 |
| MAGI2       | chr7 | 77680782 | T      | C  | -- | -- | Intron  | SNP | 0.244 | 31 | 10 |
| MAGI2       | chr7 | 77780364 | TG     | -  | -- | -- | Intron  | DEL | 0.250 | 12 | 4  |
| MAGI2       | chr7 | 77837473 | A      | T  | -- | -- | Intron  | SNP | 0.174 | 19 | 4  |
| MAGI2       | chr7 | 77862912 | G      | A  | -- | -- | Intron  | SNP | 0.237 | 45 | 14 |
| MAGI2       | chr7 | 77952555 | C      | A  | -- | -- | Intron  | SNP | 0.333 | 28 | 14 |
| MAGI2       | chr7 | 77952556 | T      | A  | -- | -- | Intron  | SNP | 0.350 | 26 | 14 |
| MAGI2       | chr7 | 78242435 | G      | A  | -- | -- | Intron  | SNP | 0.333 | 40 | 20 |
| MAGI2       | chr7 | 78299122 | A      | G  | -- | -- | Intron  | SNP | 0.278 | 13 | 5  |
| MAGI2       | chr7 | 78822410 | T      | A  | -- | -- | Intron  | SNP | 0.556 | 16 | 20 |
| MAGI2       | chr7 | 78963363 | AC     | -  | -- | -- | Intron  | DEL | 0.333 | 24 | 12 |
| MAGI2       | chr7 | 78965443 | C      | G  | -- | -- | Intron  | SNP | 0.214 | 33 | 9  |
| MAGI2       | chr7 | 79072468 | G      | A  | -- | -- | Intron  | SNP | 0.234 | 36 | 11 |
| --          | chr7 | 79109828 | C      | A  | -- | -- | IGR     | SNP | 0.108 | 33 | 4  |
| --          | chr7 | 79311525 | A      | T  | -- | -- | IGR     | SNP | 0.216 | 29 | 8  |
| --          | chr7 | 79311526 | G      | T  | -- | -- | IGR     | SNP | 0.216 | 29 | 8  |
| --          | chr7 | 79313320 | T      | A  | -- | -- | IGR     | SNP | 0.140 | 37 | 6  |
| --          | chr7 | 79381574 | G      | C  | -- | -- | IGR     | SNP | 0.432 | 25 | 19 |
| --          | chr7 | 79519009 | A      | C  | -- | -- | IGR     | SNP | 0.500 | 25 | 25 |
| --          | chr7 | 79692263 | G      | T  | -- | -- | IGR     | SNP | 0.500 | 6  | 6  |
| SEMA3C      | chr7 | 80379819 | T      | C  | -- | -- | Intron  | SNP | 0.375 | 5  | 3  |
| SEMA3C      | chr7 | 80398186 | A      | G  | -- | -- | Intron  | SNP | 0.364 | 28 | 16 |
| --          | chr7 | 80916798 | A      | T  | -- | -- | IGR     | SNP | 0.313 | 11 | 5  |
| --          | chr7 | 81239886 | C      | T  | -- | -- | IGR     | SNP | 0.484 | 16 | 15 |
| --          | chr7 | 81439134 | T      | G  | -- | -- | IGR     | SNP | 0.621 | 11 | 18 |
| CACNA2D1    | chr7 | 81613402 | C      | A  | -- | -- | Intron  | SNP | 0.231 | 30 | 9  |



|               |      |          |       |       |    |    |        |     |       |    |    |
|---------------|------|----------|-------|-------|----|----|--------|-----|-------|----|----|
| CACNA2D1      | chr7 | 81613403 | T     | A     | -- | -- | Intron | SNP | 0.225 | 31 | 9  |
| CACNA2D1      | chr7 | 81669395 | T     | A     | -- | -- | Intron | SNP | 0.222 | 28 | 8  |
| CACNA2D1      | chr7 | 81812768 | GT    | -     | -- | -- | Intron | DEL | 0.121 | 29 | 4  |
| PCLO          | chr7 | 82478201 | T     | A     | -- | -- | Intron | SNP | 0.209 | 34 | 9  |
| PCLO          | chr7 | 82571321 | C     | A     | -- | -- | Intron | SNP | 0.324 | 23 | 11 |
| --            | chr7 | 82795295 | C     | A     | -- | -- | IGR    | SNP | 0.200 | 16 | 4  |
| --            | chr7 | 82860104 | A     | T     | -- | -- | IGR    | SNP | 0.318 | 30 | 14 |
| SEMA3E        | chr7 | 83170195 | T     | A     | -- | -- | Intron | SNP | 0.351 | 24 | 13 |
| SEMA3E        | chr7 | 83234748 | TC    | -     | -- | -- | Intron | DEL | 0.105 | 17 | 2  |
| --            | chr7 | 83330515 | AG    | -     | -- | -- | IGR    | DEL | 0.111 | 24 | 3  |
| --            | chr7 | 83489208 | T     | C     | -- | -- | IGR    | SNP | 0.432 | 21 | 16 |
| --            | chr7 | 83498462 | C     | T     | -- | -- | IGR    | SNP | 0.614 | 17 | 27 |
| --            | chr7 | 83577975 | G     | T     | -- | -- | IGR    | SNP | 0.232 | 43 | 13 |
| SEMA3A        | chr7 | 83761197 | C     | T     | -- | -- | Intron | SNP | 0.667 | 13 | 26 |
| --            | chr7 | 83854875 | G     | T     | -- | -- | IGR    | SNP | 0.273 | 32 | 12 |
| --            | chr7 | 83904192 | TA    | -     | -- | -- | IGR    | DEL | 0.370 | 17 | 10 |
| --            | chr7 | 83946738 | C     | T     | -- | -- | IGR    | SNP | 0.684 | 12 | 26 |
| --            | chr7 | 83985693 | C     | A     | -- | -- | IGR    | SNP | 0.226 | 24 | 7  |
| --            | chr7 | 84102458 | GGT   | -     | -- | -- | IGR    | DEL | 0.143 | 24 | 4  |
| --            | chr7 | 84119536 | T     | A     | -- | -- | IGR    | SNP | 0.211 | 15 | 4  |
| --            | chr7 | 84279469 | A     | T     | -- | -- | IGR    | SNP | 0.243 | 28 | 9  |
| --            | chr7 | 84306667 | G     | A     | -- | -- | IGR    | SNP | 0.526 | 18 | 20 |
| --            | chr7 | 84444149 | T     | A     | -- | -- | IGR    | SNP | 0.190 | 17 | 4  |
| --            | chr7 | 84457830 | T     | A     | -- | -- | IGR    | SNP | 0.486 | 19 | 18 |
| --            | chr7 | 84476850 | G     | A     | -- | -- | IGR    | SNP | 0.154 | 33 | 6  |
| --            | chr7 | 84541166 | G     | C     | -- | -- | IGR    | SNP | 0.276 | 21 | 8  |
| --            | chr7 | 84881858 | T     | A     | -- | -- | IGR    | SNP | 0.500 | 3  | 3  |
| --            | chr7 | 84890296 | A     | G     | -- | -- | IGR    | SNP | 0.200 | 20 | 5  |
| --            | chr7 | 85026735 | A     | T     | -- | -- | IGR    | SNP | 0.296 | 19 | 8  |
| --            | chr7 | 85394997 | G     | A     | -- | -- | IGR    | SNP | 0.389 | 11 | 7  |
| --            | chr7 | 85483861 | C     | T     | -- | -- | IGR    | SNP | 0.333 | 20 | 10 |
| --            | chr7 | 85506147 | A     | T     | -- | -- | IGR    | SNP | 0.212 | 26 | 7  |
| --            | chr7 | 85635727 | A     | T     | -- | -- | IGR    | SNP | 0.432 | 25 | 19 |
| --            | chr7 | 85705685 | A     | T     | -- | -- | IGR    | SNP | 0.227 | 17 | 5  |
| --            | chr7 | 85795784 | T     | A     | -- | -- | IGR    | SNP | 0.190 | 34 | 8  |
| --            | chr7 | 85853045 | A     | T     | -- | -- | IGR    | SNP | 0.618 | 13 | 21 |
| --            | chr7 | 85946931 | C     | T     | -- | -- | IGR    | SNP | 0.206 | 27 | 7  |
| --            | chr7 | 85987936 | G     | T     | -- | -- | IGR    | SNP | 0.561 | 18 | 23 |
| --            | chr7 | 86070852 | C     | T     | -- | -- | IGR    | SNP | 0.103 | 26 | 3  |
| --            | chr7 | 86122746 | G     | A     | -- | -- | IGR    | SNP | 0.250 | 24 | 8  |
| --            | chr7 | 86180027 | G     | A     | -- | -- | IGR    | SNP | 0.333 | 10 | 5  |
| --            | chr7 | 86180035 | T     | C     | -- | -- | IGR    | SNP | 0.385 | 8  | 5  |
| GRM3          | chr7 | 86332435 | T     | C     | -- | -- | Intron | SNP | 0.286 | 25 | 10 |
| GRM3          | chr7 | 86333930 | A     | G     | -- | -- | Intron | SNP | 0.200 | 24 | 6  |
| GRM3          | chr7 | 86480753 | G     | A     | -- | -- | Intron | SNP | 0.310 | 40 | 18 |
| --            | chr7 | 86693898 | C     | T     | -- | -- | Intron | SNP | 0.250 | 9  | 3  |
| ABCB1         | chr7 | 87255465 | AT    | -     | -- | -- | Intron | DEL | 0.105 | 17 | 2  |
| ABCB1         | chr7 | 87255490 | AT    | -     | -- | -- | Intron | DEL | 0.143 | 18 | 3  |
| ABCB1,RUNDC3B | chr7 | 87270046 | T     | A     | -- | -- | Intron | SNP | 0.345 | 19 | 10 |
| RUNDC3B       | chr7 | 87366434 | C     | G     | -- | -- | Intron | SNP | 0.333 | 10 | 5  |
| RUNDC3B       | chr7 | 87404992 | A     | T     | -- | -- | Intron | SNP | 0.341 | 27 | 14 |
| SLC25A40      | chr7 | 87470475 | GTA   | -     | -- | -- | Intron | DEL | 0.111 | 16 | 2  |
| --            | chr7 | 87557022 | A     | T     | -- | -- | IGR    | SNP | 0.118 | 30 | 4  |
| --            | chr7 | 87881894 | C     | A     | -- | -- | IGR    | SNP | 0.500 | 20 | 20 |
| --            | chr7 | 87958794 | C     | T     | -- | -- | IGR    | SNP | 0.591 | 18 | 26 |
| --            | chr7 | 88189477 | A     | G     | -- | -- | IGR    | SNP | 0.206 | 27 | 7  |
| ZNF804B       | chr7 | 88428078 | G     | A     | -- | -- | Intron | SNP | 0.368 | 24 | 14 |
| ZNF804B       | chr7 | 88540483 | G     | C     | -- | -- | Intron | SNP | 0.293 | 29 | 12 |
| ZNF804B       | chr7 | 88583326 | -     | GTGGA | -- | -- | Intron | INS | 0.371 | 22 | 13 |
| ZNF804B       | chr7 | 88845181 | G     | C     | -- | -- | Intron | SNP | 0.545 | 5  | 6  |
| ZNF804B       | chr7 | 88864574 | A     | T     | -- | -- | Intron | SNP | 0.167 | 25 | 5  |
| ZNF804B       | chr7 | 88875399 | G     | A     | -- | -- | Intron | SNP | 0.358 | 34 | 19 |
| --            | chr7 | 88980225 | T     | G     | -- | -- | IGR    | SNP | 0.304 | 32 | 14 |
| --            | chr7 | 88980282 | A     | C     | -- | -- | IGR    | SNP | 0.262 | 31 | 11 |
| --            | chr7 | 89072307 | TG    | -     | -- | -- | IGR    | DEL | 0.133 | 13 | 2  |
| --            | chr7 | 89102575 | C     | T     | -- | -- | IGR    | SNP | 0.705 | 13 | 31 |
| --            | chr7 | 89231338 | G     | C     | -- | -- | IGR    | SNP | 0.300 | 21 | 9  |
| --            | chr7 | 89388268 | T     | C     | -- | -- | IGR    | SNP | 0.432 | 21 | 16 |
| --            | chr7 | 89395477 | A     | T     | -- | -- | IGR    | SNP | 0.188 | 26 | 6  |
| --            | chr7 | 89646567 | C     | A     | -- | -- | IGR    | SNP | 0.306 | 25 | 11 |
| --            | chr7 | 89743696 | G     | A     | -- | -- | IGR    | SNP | 0.222 | 21 | 6  |
| --            | chr7 | 89758894 | C     | T     | -- | -- | IGR    | SNP | 0.211 | 15 | 4  |
| --            | chr7 | 89833497 | T     | C     | -- | -- | IGR    | SNP | 0.286 | 10 | 4  |
| --            | chr7 | 89833514 | A     | G     | -- | -- | IGR    | SNP | 0.250 | 12 | 4  |
| --            | chr7 | 89833523 | C     | T     | -- | -- | IGR    | SNP | 0.222 | 14 | 4  |
| --            | chr7 | 89871082 | C     | G     | -- | -- | IGR    | SNP | 0.322 | 40 | 19 |
| --            | chr7 | 90280305 | GAAGA | -     | -- | -- | IGR    | DEL | 0.105 | 17 | 2  |
| --            | chr7 | 90299285 | -     | GT    | -- | -- | IGR    | INS | 0.209 | 34 | 9  |
| CDK14         | chr7 | 90432663 | G     | T     | -- | -- | Intron | SNP | 0.342 | 25 | 13 |
| CDK14         | chr7 | 90550300 | C     | T     | -- | -- | Intron | SNP | 0.128 | 34 | 5  |

|             |      |           |     |       |    |    |        |     |       |    |    |
|-------------|------|-----------|-----|-------|----|----|--------|-----|-------|----|----|
| --          | chr7 | 91023711  | -   | CAA   | -- | -- | IGR    | INS | 0.143 | 18 | 3  |
| --          | chr7 | 91103101  | A   | C     | -- | -- | IGR    | SNP | 0.325 | 27 | 13 |
| --          | chr7 | 91109877  | A   | G     | -- | -- | IGR    | SNP | 0.115 | 23 | 3  |
| --          | chr7 | 91109890  | T   | C     | -- | -- | IGR    | SNP | 0.182 | 18 | 4  |
| --          | chr7 | 91249889  | T   | C     | -- | -- | IGR    | SNP | 0.235 | 26 | 8  |
| --          | chr7 | 91288093  | C   | G     | -- | -- | IGR    | SNP | 0.190 | 34 | 8  |
| --          | chr7 | 91538218  | T   | C     | -- | -- | IGR    | SNP | 0.125 | 21 | 3  |
| --          | chr7 | 91538231  | T   | A     | -- | -- | IGR    | SNP | 0.136 | 19 | 3  |
| AKAP9       | chr7 | 91650166  | G   | A     | -- | -- | Intron | SNP | 0.137 | 44 | 7  |
| ANKIB1      | chr7 | 91953566  | G   | C     | -- | -- | Intron | SNP | 0.326 | 29 | 14 |
| --          | chr7 | 92590945  | G   | A     | -- | -- | IGR    | SNP | 0.146 | 35 | 6  |
| --          | chr7 | 92617043  | C   | T     | -- | -- | IGR    | SNP | 0.518 | 27 | 29 |
| --          | chr7 | 93325867  | G   | T     | -- | -- | IGR    | SNP | 0.382 | 21 | 13 |
| --          | chr7 | 93332643  | C   | T     | -- | -- | IGR    | SNP | 0.308 | 18 | 8  |
| --          | chr7 | 93366031  | G   | T     | -- | -- | IGR    | SNP | 0.302 | 30 | 13 |
| --          | chr7 | 93654792  | C   | T     | -- | -- | IGR    | SNP | 0.391 | 28 | 18 |
| --          | chr7 | 93659343  | C   | T     | -- | -- | IGR    | SNP | 0.297 | 26 | 11 |
| --          | chr7 | 93715740  | AG  | -     | -- | -- | IGR    | DEL | 0.103 | 26 | 3  |
| --          | chr7 | 93860215  | G   | A     | -- | -- | IGR    | SNP | 0.571 | 12 | 16 |
| --          | chr7 | 93882235  | A   | C     | -- | -- | IGR    | SNP | 0.176 | 14 | 3  |
| --          | chr7 | 93886429  | A   | C     | -- | -- | IGR    | SNP | 0.161 | 26 | 5  |
| --          | chr7 | 93990104  | A   | T     | -- | -- | IGR    | SNP | 0.171 | 34 | 7  |
| PPP1R9A     | chr7 | 94607093  | G   | T     | -- | -- | Intron | SNP | 0.176 | 14 | 3  |
| PPP1R9A     | chr7 | 94610010  | T   | C     | -- | -- | Intron | SNP | 0.667 | 12 | 24 |
| PPP1R9A     | chr7 | 94692010  | T   | G     | -- | -- | Intron | SNP | 0.415 | 24 | 17 |
| --          | chr7 | 94956971  | G   | C     | -- | -- | IGR    | SNP | 0.304 | 39 | 17 |
| --          | chr7 | 95031732  | G   | T     | -- | -- | IGR    | SNP | 0.158 | 16 | 3  |
| --          | chr7 | 95197033  | -   | AC    | -- | -- | IGR    | INS | 0.118 | 15 | 2  |
| --          | chr7 | 96061039  | G   | T     | -- | -- | IGR    | SNP | 0.250 | 12 | 4  |
| --          | chr7 | 96511959  | G   | A     | -- | -- | IGR    | SNP | 0.167 | 45 | 9  |
| --          | chr7 | 97014538  | C   | T     | -- | -- | IGR    | SNP | 0.138 | 25 | 4  |
| --          | chr7 | 97080211  | C   | T     | -- | -- | IGR    | SNP | 0.286 | 15 | 6  |
| --          | chr7 | 97141122  | T   | C     | -- | -- | IGR    | SNP | 0.346 | 34 | 18 |
| --          | chr7 | 97244501  | C   | T     | -- | -- | IGR    | SNP | 0.333 | 4  | 2  |
| --          | chr7 | 97248025  | C   | G     | -- | -- | IGR    | SNP | 0.583 | 5  | 7  |
| --          | chr7 | 97257404  | C   | A     | -- | -- | IGR    | SNP | 0.227 | 34 | 10 |
| --          | chr7 | 97385021  | G   | C     | -- | -- | IGR    | SNP | 0.361 | 23 | 13 |
| --          | chr7 | 97398279  | AC  | -     | -- | -- | IGR    | DEL | 0.105 | 17 | 2  |
| --          | chr7 | 97506836  | A   | C     | -- | -- | IGR    | SNP | 0.130 | 47 | 7  |
| --          | chr7 | 97569497  | C   | T     | -- | -- | IGR    | SNP | 0.108 | 33 | 4  |
| --          | chr7 | 97679930  | T   | G     | -- | -- | IGR    | SNP | 0.222 | 21 | 6  |
| --          | chr7 | 98069727  | T   | C     | -- | -- | IGR    | SNP | 0.113 | 47 | 6  |
| --          | chr7 | 98072202  | A   | T     | -- | -- | IGR    | SNP | 0.500 | 20 | 20 |
| --          | chr7 | 98149132  | T   | A     | -- | -- | IGR    | SNP | 0.375 | 5  | 3  |
| --          | chr7 | 98345297  | A   | G     | -- | -- | IGR    | SNP | 0.238 | 16 | 5  |
| --          | chr7 | 98388878  | G   | A     | -- | -- | IGR    | SNP | 0.220 | 32 | 9  |
| --          | chr7 | 98867515  | G   | T     | -- | -- | IGR    | SNP | 0.174 | 19 | 4  |
| LOC10028911 | chr7 | 99198701  | C   | G     | -- | -- | Intron | SNP | 0.326 | 31 | 15 |
| --          | chr7 | 99895319  | T   | C     | -- | -- | IGR    | SNP | 0.192 | 21 | 5  |
| PILRA       | chr7 | 99982052  | A   | T     | -- | -- | Intron | SNP | 0.269 | 19 | 7  |
| PILRA       | chr7 | 99986402  | G   | A     | -- | -- | Intron | SNP | 0.286 | 10 | 4  |
| PILRA       | chr7 | 99989921  | CA  | -     | -- | -- | Intron | DEL | 0.456 | 43 | 36 |
| --          | chr7 | 100045202 | G   | A     | -- | -- | IGR    | SNP | 0.552 | 13 | 16 |
| TSC22D4     | chr7 | 100064855 | -   | TA    | -- | -- | Intron | INS | 0.250 | 51 | 17 |
| TFR2        | chr7 | 100237397 | C   | T     | -- | -- | Intron | SNP | 0.190 | 17 | 4  |
| --          | chr7 | 100445705 | C   | A     | -- | -- | IGR    | SNP | 0.182 | 18 | 4  |
| --          | chr7 | 100445731 | T   | A     | -- | -- | IGR    | SNP | 0.174 | 19 | 4  |
| MUC12       | chr7 | 100627142 | T   | C     | -- | -- | Intron | SNP | 0.196 | 37 | 9  |
| --          | chr7 | 100761993 | G   | T     | -- | -- | IGR    | SNP | 0.267 | 11 | 4  |
| --          | chr7 | 100925918 | G   | C     | -- | -- | IGR    | SNP | 0.417 | 35 | 25 |
| --          | chr7 | 101450063 | G   | A     | -- | -- | IGR    | SNP | 0.289 | 27 | 11 |
| CUX1        | chr7 | 101473774 | C   | G     | -- | -- | Intron | SNP | 0.608 | 20 | 31 |
| CUX1        | chr7 | 101862490 | TGA | -     | -- | -- | Intron | DEL | 0.121 | 29 | 4  |
| CUX1        | chr7 | 101919717 | C   | T     | -- | -- | Intron | SNP | 0.267 | 22 | 8  |
| --          | chr7 | 101968103 | A   | C     | -- | -- | IGR    | SNP | 0.235 | 13 | 4  |
| --          | chr7 | 101999620 | A   | G     | -- | -- | IGR    | SNP | 0.118 | 30 | 4  |
| --          | chr7 | 101999628 | A   | G     | -- | -- | IGR    | SNP | 0.118 | 30 | 4  |
| --          | chr7 | 101999650 | C   | T     | -- | -- | IGR    | SNP | 0.103 | 35 | 4  |
| --          | chr7 | 102001422 | G   | A     | -- | -- | IGR    | SNP | 0.267 | 11 | 4  |
| LOC10063092 | chr7 | 102065243 | G   | A     | -- | -- | RNA    | SNP | 0.186 | 48 | 11 |
| --          | chr7 | 102175163 | C   | T     | -- | -- | IGR    | SNP | 0.214 | 11 | 3  |
| POLR2J3     | chr7 | 102209536 | C   | T     | -- | -- | Intron | SNP | 0.164 | 51 | 10 |
| --          | chr7 | 102355057 | -   | AAAAG | -- | -- | IGR    | INS | 0.192 | 21 | 5  |
| FAM185A     | chr7 | 102420536 | T   | C     | -- | -- | Intron | SNP | 0.194 | 29 | 7  |
| FAM185A     | chr7 | 102420537 | G   | A     | -- | -- | Intron | SNP | 0.189 | 30 | 7  |
| DPY19L2P2   | chr7 | 102823789 | C   | A     | -- | -- | RNA    | SNP | 0.269 | 19 | 7  |
| DPY19L2P2   | chr7 | 102890335 | A   | G     | -- | -- | RNA    | SNP | 0.125 | 28 | 4  |
| SLC26A5     | chr7 | 103015483 | AAC | -     | -- | -- | Intron | DEL | 0.133 | 13 | 2  |
| SLC26A5     | chr7 | 103055531 | C   | A     | -- | -- | Intron | SNP | 0.538 | 18 | 21 |
| RELN        | chr7 | 103181614 | C   | T     | -- | -- | Intron | SNP | 0.556 | 20 | 25 |

|         |      |           |     |     |    |    |         |     |       |    |    |
|---------|------|-----------|-----|-----|----|----|---------|-----|-------|----|----|
| RELN    | chr7 | 103262183 | C   | G   | -- | -- | Intron  | SNP | 0.219 | 50 | 14 |
| RELN    | chr7 | 103290916 | C   | T   | -- | -- | Intron  | SNP | 0.554 | 25 | 31 |
| RELN    | chr7 | 103363281 | A   | T   | -- | -- | Intron  | SNP | 0.250 | 39 | 13 |
| RELN    | chr7 | 103420158 | G   | C   | -- | -- | Intron  | SNP | 0.351 | 24 | 13 |
| RELN    | chr7 | 103499290 | T   | G   | -- | -- | Intron  | SNP | 0.294 | 36 | 15 |
| --      | chr7 | 103885913 | T   | C   | -- | -- | IGR     | SNP | 0.357 | 18 | 10 |
| LHFPL3  | chr7 | 104185673 | T   | C   | -- | -- | Intron  | SNP | 0.529 | 24 | 27 |
| LHFPL3  | chr7 | 104302649 | A   | T   | -- | -- | Intron  | SNP | 0.209 | 34 | 9  |
| LHFPL3  | chr7 | 104408462 | T   | C   | -- | -- | Intron  | SNP | 0.643 | 15 | 27 |
| LHFPL3  | chr7 | 104446800 | T   | A   | -- | -- | Intron  | SNP | 0.543 | 21 | 25 |
| SRPK2   | chr7 | 104873103 | C   | T   | -- | -- | Intron  | SNP | 0.571 | 15 | 20 |
| --      | chr7 | 105058782 | C   | T   | -- | -- | IGR     | SNP | 0.500 | 6  | 6  |
| --      | chr7 | 105238586 | C   | A   | -- | -- | IGR     | SNP | 0.174 | 38 | 8  |
| ATXN7L1 | chr7 | 105508370 | C   | T   | -- | -- | Intron  | SNP | 0.381 | 26 | 16 |
| --      | chr7 | 106006737 | G   | T   | -- | -- | IGR     | SNP | 0.200 | 24 | 6  |
| C7orf74 | chr7 | 106302003 | C   | G   | -- | -- | 5'Flank | SNP | 0.596 | 21 | 31 |
| --      | chr7 | 106368236 | C   | A   | -- | -- | IGR     | SNP | 0.111 | 24 | 3  |
| --      | chr7 | 106368257 | A   | G   | -- | -- | IGR     | SNP | 0.103 | 26 | 3  |
| --      | chr7 | 106469734 | C   | T   | -- | -- | IGR     | SNP | 0.489 | 23 | 22 |
| --      | chr7 | 106633770 | A   | C   | -- | -- | IGR     | SNP | 0.292 | 17 | 7  |
| HBP1    | chr7 | 106814141 | G   | C   | -- | -- | Intron  | SNP | 0.273 | 32 | 12 |
| COG5    | chr7 | 106947901 | C   | G   | -- | -- | Intron  | SNP | 0.522 | 22 | 24 |
| --      | chr7 | 107470336 | AG  | -   | -- | -- | IGR     | DEL | 0.103 | 26 | 3  |
| LAMB4   | chr7 | 107759119 | T   | A   | -- | -- | Intron  | SNP | 0.167 | 40 | 8  |
| --      | chr7 | 108582068 | T   | G   | -- | -- | IGR     | SNP | 0.235 | 13 | 4  |
| --      | chr7 | 108629478 | G   | A   | -- | -- | IGR     | SNP | 0.238 | 32 | 10 |
| --      | chr7 | 108653389 | A   | C   | -- | -- | IGR     | SNP | 0.231 | 10 | 3  |
| --      | chr7 | 108689849 | A   | T   | -- | -- | IGR     | SNP | 0.130 | 20 | 3  |
| --      | chr7 | 108712438 | GCA | -   | -- | -- | IGR     | DEL | 0.103 | 26 | 3  |
| --      | chr7 | 108766221 | A   | T   | -- | -- | IGR     | SNP | 0.224 | 38 | 11 |
| --      | chr7 | 108871951 | C   | A   | -- | -- | IGR     | SNP | 0.528 | 17 | 19 |
| --      | chr7 | 108948689 | G   | T   | -- | -- | IGR     | SNP | 0.175 | 33 | 7  |
| --      | chr7 | 108964393 | C   | T   | -- | -- | IGR     | SNP | 0.270 | 27 | 10 |
| --      | chr7 | 108977926 | A   | T   | -- | -- | IGR     | SNP | 0.125 | 28 | 4  |
| --      | chr7 | 109014751 | G   | C   | -- | -- | IGR     | SNP | 0.189 | 30 | 7  |
| --      | chr7 | 109060938 | T   | G   | -- | -- | IGR     | SNP | 0.324 | 23 | 11 |
| --      | chr7 | 109148092 | G   | A   | -- | -- | IGR     | SNP | 0.200 | 16 | 4  |
| --      | chr7 | 109390128 | T   | A   | -- | -- | IGR     | SNP | 0.273 | 24 | 9  |
| --      | chr7 | 109433769 | C   | A   | -- | -- | IGR     | SNP | 0.196 | 37 | 9  |
| --      | chr7 | 109513571 | G   | A   | -- | -- | IGR     | SNP | 0.605 | 17 | 26 |
| --      | chr7 | 109576021 | C   | T   | -- | -- | IGR     | SNP | 0.486 | 19 | 18 |
| --      | chr7 | 110077276 | G   | T   | -- | -- | IGR     | SNP | 0.208 | 38 | 10 |
| --      | chr7 | 110114880 | G   | T   | -- | -- | IGR     | SNP | 0.273 | 16 | 6  |
| IMMP2L  | chr7 | 110484859 | C   | G   | -- | -- | Intron  | SNP | 0.449 | 27 | 22 |
| IMMP2L  | chr7 | 110857184 | A   | T   | -- | -- | Intron  | SNP | 0.176 | 14 | 3  |
| --      | chr7 | 111224056 | T   | A   | -- | -- | IGR     | SNP | 0.352 | 35 | 19 |
| --      | chr7 | 111224057 | C   | G   | -- | -- | IGR     | SNP | 0.352 | 35 | 19 |
| --      | chr7 | 112034148 | G   | A   | -- | -- | IGR     | SNP | 0.326 | 31 | 15 |
| IFRD1   | chr7 | 112097283 | C   | A   | -- | -- | Intron  | SNP | 0.192 | 42 | 10 |
| IFRD1   | chr7 | 112099909 | G   | T   | -- | -- | Intron  | SNP | 0.143 | 48 | 8  |
| --      | chr7 | 112743413 | G   | A   | -- | -- | IGR     | SNP | 0.128 | 34 | 5  |
| --      | chr7 | 112752432 | C   | A   | -- | -- | IGR     | SNP | 0.115 | 46 | 6  |
| --      | chr7 | 112843941 | A   | T   | -- | -- | IGR     | SNP | 0.113 | 47 | 6  |
| --      | chr7 | 112848072 | A   | T   | -- | -- | IGR     | SNP | 0.226 | 24 | 7  |
| --      | chr7 | 113240480 | -   | AC  | -- | -- | IGR     | INS | 0.220 | 32 | 9  |
| --      | chr7 | 113347056 | G   | A   | -- | -- | IGR     | SNP | 0.290 | 22 | 9  |
| --      | chr7 | 113367515 | C   | G   | -- | -- | IGR     | SNP | 0.302 | 30 | 13 |
| --      | chr7 | 113383659 | T   | G   | -- | -- | IGR     | SNP | 0.192 | 21 | 5  |
| --      | chr7 | 113383698 | G   | C   | -- | -- | IGR     | SNP | 0.278 | 13 | 5  |
| --      | chr7 | 113383712 | G   | A   | -- | -- | IGR     | SNP | 0.278 | 13 | 5  |
| --      | chr7 | 113386104 | G   | A   | -- | -- | IGR     | SNP | 0.600 | 2  | 3  |
| --      | chr7 | 113469601 | C   | G   | -- | -- | IGR     | SNP | 0.379 | 18 | 11 |
| --      | chr7 | 113498567 | T   | A   | -- | -- | IGR     | SNP | 0.619 | 16 | 26 |
| --      | chr7 | 113914511 | C   | G   | -- | -- | IGR     | SNP | 0.250 | 27 | 9  |
| --      | chr7 | 113914688 | G   | T   | -- | -- | IGR     | SNP | 0.222 | 14 | 4  |
| --      | chr7 | 113916058 | C   | T   | -- | -- | IGR     | SNP | 0.354 | 31 | 17 |
| --      | chr7 | 113994758 | T   | A   | -- | -- | IGR     | SNP | 0.447 | 21 | 17 |
| --      | chr7 | 114039923 | C   | T   | -- | -- | IGR     | SNP | 0.286 | 10 | 4  |
| --      | chr7 | 114488285 | G   | A   | -- | -- | IGR     | SNP | 0.447 | 21 | 17 |
| --      | chr7 | 114542861 | G   | C   | -- | -- | IGR     | SNP | 0.250 | 24 | 8  |
| --      | chr7 | 114665399 | -   | GGT | -- | -- | IGR     | INS | 0.200 | 12 | 3  |
| --      | chr7 | 114897118 | A   | T   | -- | -- | IGR     | SNP | 0.366 | 26 | 15 |
| --      | chr7 | 115013528 | G   | T   | -- | -- | IGR     | SNP | 0.226 | 41 | 12 |
| --      | chr7 | 115225458 | G   | T   | -- | -- | IGR     | SNP | 0.288 | 37 | 15 |
| --      | chr7 | 115234684 | C   | A   | -- | -- | IGR     | SNP | 0.190 | 34 | 8  |
| --      | chr7 | 115412244 | G   | C   | -- | -- | IGR     | SNP | 0.290 | 22 | 9  |
| --      | chr7 | 115502780 | A   | G   | -- | -- | IGR     | SNP | 0.225 | 31 | 9  |
| --      | chr7 | 115562845 | GC  | -   | -- | -- | IGR     | DEL | 0.286 | 25 | 10 |
| --      | chr7 | 115693057 | C   | T   | -- | -- | IGR     | SNP | 0.407 | 16 | 11 |
| --      | chr7 | 115806972 | G   | A   | -- | -- | IGR     | SNP | 0.222 | 35 | 10 |

|          |      |           |     |      |       |       |                 |     |       |    |    |
|----------|------|-----------|-----|------|-------|-------|-----------------|-----|-------|----|----|
| --       | chr7 | 115985101 | T   | A    | --    | --    | IGR             | SNP | 0.394 | 20 | 13 |
| ST7-OT4  | chr7 | 116597211 | C   | A    | --    | --    | RNA             | SNP | 0.277 | 47 | 18 |
| --       | chr7 | 116898469 | A   | T    | --    | --    | IGR             | SNP | 0.280 | 36 | 14 |
| CFTR     | chr7 | 117201152 | C   | T    | --    | --    | Intron          | SNP | 0.136 | 19 | 3  |
| CFTR     | chr7 | 117303939 | T   | A    | --    | --    | Intron          | SNP | 0.276 | 21 | 8  |
| CTTNBP2  | chr7 | 117401524 | G   | T    | --    | --    | Intron          | SNP | 0.581 | 13 | 18 |
| --       | chr7 | 117618187 | G   | T    | --    | --    | IGR             | SNP | 0.200 | 24 | 6  |
| --       | chr7 | 117685823 | C   | A    | --    | --    | IGR             | SNP | 0.240 | 38 | 12 |
| --       | chr7 | 117742406 | A   | T    | --    | --    | IGR             | SNP | 0.250 | 24 | 8  |
| --       | chr7 | 118090789 | A   | T    | --    | --    | IGR             | SNP | 0.244 | 31 | 10 |
| --       | chr7 | 118124257 | T   | G    | --    | --    | IGR             | SNP | 0.190 | 17 | 4  |
| --       | chr7 | 118323435 | C   | A    | --    | --    | IGR             | SNP | 0.261 | 34 | 12 |
| --       | chr7 | 118548829 | A   | C    | --    | --    | IGR             | SNP | 0.333 | 24 | 12 |
| --       | chr7 | 118587826 | G   | A    | --    | --    | IGR             | SNP | 0.353 | 22 | 12 |
| --       | chr7 | 118644319 | G   | A    | --    | --    | IGR             | SNP | 0.389 | 22 | 14 |
| --       | chr7 | 118670499 | T   | C    | --    | --    | IGR             | SNP | 0.233 | 23 | 7  |
| --       | chr7 | 118769849 | G   | C    | --    | --    | IGR             | SNP | 0.319 | 32 | 15 |
| --       | chr7 | 118798275 | C   | T    | --    | --    | IGR             | SNP | 0.286 | 25 | 10 |
| --       | chr7 | 118812825 | G   | A    | --    | --    | IGR             | SNP | 0.114 | 39 | 5  |
| --       | chr7 | 118841139 | A   | G    | --    | --    | IGR             | SNP | 0.345 | 36 | 19 |
| --       | chr7 | 118946579 | A   | C    | --    | --    | IGR             | SNP | 0.267 | 22 | 8  |
| --       | chr7 | 119195699 | C   | A    | --    | --    | IGR             | SNP | 0.279 | 49 | 19 |
| --       | chr7 | 119246118 | A   | C    | --    | --    | IGR             | SNP | 0.400 | 30 | 20 |
| --       | chr7 | 119380373 | TGA | -    | --    | --    | IGR             | DEL | 0.103 | 35 | 4  |
| --       | chr7 | 119547168 | G   | A    | --    | --    | IGR             | SNP | 0.368 | 24 | 14 |
| --       | chr7 | 119558965 | G   | T    | --    | --    | IGR             | SNP | 0.250 | 27 | 9  |
| --       | chr7 | 119874988 | -   | CTCG | --    | --    | IGR             | INS | 0.273 | 16 | 6  |
| KCND2    | chr7 | 119951018 | G   | A    | --    | --    | Intron          | SNP | 0.200 | 28 | 7  |
| KCND2    | chr7 | 120150851 | C   | T    | --    | --    | Intron          | SNP | 0.704 | 8  | 19 |
| KCND2    | chr7 | 120181761 | A   | T    | --    | --    | Intron          | SNP | 0.241 | 41 | 13 |
| --       | chr7 | 120508599 | A   | T    | --    | --    | IGR             | SNP | 0.229 | 27 | 8  |
| --       | chr7 | 120584319 | G   | A    | --    | --    | IGR             | SNP | 0.171 | 29 | 6  |
| C7orf58  | chr7 | 120643189 | G   | A    | --    | --    | Intron          | SNP | 0.560 | 22 | 28 |
| C7orf58  | chr7 | 120649554 | G   | T    | --    | --    | Intron          | SNP | 0.204 | 39 | 10 |
| C7orf58  | chr7 | 120675983 | G   | A    | --    | --    | Intron          | SNP | 0.292 | 17 | 7  |
| --       | chr7 | 120960018 | T   | C    | --    | --    | IGR             | SNP | 0.129 | 27 | 4  |
| FAM3C    | chr7 | 121020788 | TTA | -    | --    | --    | Intron          | DEL | 0.250 | 15 | 5  |
| --       | chr7 | 121172478 | C   | T    | --    | --    | IGR             | SNP | 0.415 | 24 | 17 |
| PTPRZ1   | chr7 | 121672508 | G   | T    | --    | --    | Intron          | SNP | 0.500 | 20 | 20 |
| PTPRZ1   | chr7 | 121672509 | G   | C    | --    | --    | Intron          | SNP | 0.513 | 19 | 20 |
| CADPS2   | chr7 | 122277588 | A   | C    | --    | --    | Intron          | SNP | 0.275 | 29 | 11 |
| CADPS2   | chr7 | 122348203 | C   | T    | --    | --    | Intron          | SNP | 0.276 | 21 | 8  |
| --       | chr7 | 122725828 | T   | G    | --    | --    | IGR             | SNP | 0.295 | 31 | 13 |
| --       | chr7 | 122725829 | G   | T    | --    | --    | IGR             | SNP | 0.295 | 31 | 13 |
| --       | chr7 | 123015555 | C   | A    | --    | --    | IGR             | SNP | 0.362 | 30 | 17 |
| TMEM229A | chr7 | 123672640 | G   | T    | C418A | L140I | Missense_mutati | SNP | 0.260 | 37 | 13 |
| --       | chr7 | 123859588 | A   | T    | --    | --    | IGR             | SNP | 0.321 | 19 | 9  |
| --       | chr7 | 123884510 | C   | A    | --    | --    | IGR             | SNP | 0.583 | 15 | 21 |
| --       | chr7 | 123895981 | A   | C    | --    | --    | IGR             | SNP | 0.186 | 35 | 8  |
| --       | chr7 | 123995138 | T   | A    | --    | --    | IGR             | SNP | 0.206 | 27 | 7  |
| --       | chr7 | 124070208 | G   | T    | --    | --    | IGR             | SNP | 0.161 | 47 | 9  |
| --       | chr7 | 124272976 | T   | C    | --    | --    | IGR             | SNP | 0.150 | 34 | 6  |
| --       | chr7 | 124373169 | G   | A    | --    | --    | IGR             | SNP | 0.148 | 23 | 4  |
| --       | chr7 | 124373221 | A   | G    | --    | --    | IGR             | SNP | 0.208 | 19 | 5  |
| --       | chr7 | 124373884 | A   | G    | --    | --    | IGR             | SNP | 0.136 | 19 | 3  |
| --       | chr7 | 124600635 | G   | T    | --    | --    | IGR             | SNP | 0.235 | 26 | 8  |
| --       | chr7 | 124819854 | T   | C    | --    | --    | IGR             | SNP | 0.118 | 30 | 4  |
| --       | chr7 | 124915985 | A   | T    | --    | --    | IGR             | SNP | 0.161 | 26 | 5  |
| --       | chr7 | 125176682 | C   | G    | --    | --    | IGR             | SNP | 0.710 | 9  | 22 |
| --       | chr7 | 125441721 | A   | T    | --    | --    | IGR             | SNP | 0.349 | 28 | 15 |
| --       | chr7 | 125466350 | C   | T    | --    | --    | IGR             | SNP | 0.220 | 32 | 9  |
| --       | chr7 | 125529217 | G   | A    | --    | --    | IGR             | SNP | 0.500 | 9  | 9  |
| --       | chr7 | 125626674 | T   | A    | --    | --    | IGR             | SNP | 0.406 | 19 | 13 |
| --       | chr7 | 125870099 | G   | A    | --    | --    | IGR             | SNP | 0.345 | 36 | 19 |
| --       | chr7 | 125949523 | C   | T    | --    | --    | IGR             | SNP | 0.625 | 12 | 20 |
| --       | chr7 | 126074492 | T   | G    | --    | --    | IGR             | SNP | 0.568 | 19 | 25 |
| GRM8     | chr7 | 126105702 | T   | C    | --    | --    | Intron          | SNP | 0.290 | 22 | 9  |
| GRM8     | chr7 | 126224812 | G   | A    | --    | --    | Intron          | SNP | 0.250 | 24 | 8  |
| GRM8     | chr7 | 126231031 | A   | T    | --    | --    | Intron          | SNP | 0.606 | 13 | 20 |
| GRM8     | chr7 | 126337503 | A   | T    | --    | --    | Intron          | SNP | 0.149 | 40 | 7  |
| GRM8     | chr7 | 126470125 | A   | C    | --    | --    | Intron          | SNP | 0.250 | 9  | 3  |
| GRM8     | chr7 | 126471323 | A   | T    | --    | --    | Intron          | SNP | 0.122 | 36 | 5  |
| GRM8     | chr7 | 126693360 | C   | A    | --    | --    | Intron          | SNP | 0.191 | 38 | 9  |
| GRM8     | chr7 | 126873773 | C   | T    | --    | --    | Intron          | SNP | 0.170 | 44 | 9  |
| --       | chr7 | 127055379 | G   | C    | --    | --    | IGR             | SNP | 0.462 | 28 | 24 |
| RBM28    | chr7 | 127963343 | T   | A    | --    | --    | Intron          | SNP | 0.169 | 59 | 12 |
| --       | chr7 | 128156479 | T   | C    | --    | --    | IGR             | SNP | 0.150 | 34 | 6  |
| --       | chr7 | 128166761 | C   | T    | --    | --    | IGR             | SNP | 0.356 | 29 | 16 |
| --       | chr7 | 128182735 | A   | G    | --    | --    | IGR             | SNP | 0.146 | 35 | 6  |
| --       | chr7 | 128184323 | G   | A    | --    | --    | IGR             | SNP | 0.160 | 42 | 8  |

|            |      |           |    |     |    |    |         |     |       |    |    |
|------------|------|-----------|----|-----|----|----|---------|-----|-------|----|----|
| --         | chr7 | 128192587 | T  | C   | -- | -- | IGR     | SNP | 0.107 | 25 | 3  |
| --         | chr7 | 128208338 | C  | T   | -- | -- | IGR     | SNP | 0.120 | 22 | 3  |
| --         | chr7 | 128213726 | -  | CA  | -- | -- | IGR     | INS | 0.171 | 34 | 7  |
| --         | chr7 | 128229298 | GC | -   | -- | -- | IGR     | DEL | 0.149 | 40 | 7  |
| --         | chr7 | 128229315 | G  | C   | -- | -- | IGR     | SNP | 0.140 | 49 | 8  |
| --         | chr7 | 128247047 | G  | C   | -- | -- | IGR     | SNP | 0.119 | 52 | 7  |
| --         | chr7 | 128247287 | C  | T   | -- | -- | IGR     | SNP | 0.136 | 38 | 6  |
| --         | chr7 | 128262371 | T  | A   | -- | -- | IGR     | SNP | 0.111 | 24 | 3  |
| --         | chr7 | 128347135 | T  | C   | -- | -- | IGR     | SNP | 0.176 | 28 | 6  |
| KCP        | chr7 | 128535361 | G  | T   | -- | -- | Intron  | SNP | 0.194 | 58 | 14 |
| FAM40B     | chr7 | 129075101 | G  | A   | -- | -- | Intron  | SNP | 0.214 | 44 | 12 |
| FAM40B     | chr7 | 129078388 | G  | A   | -- | -- | Intron  | SNP | 0.114 | 39 | 5  |
| --         | chr7 | 129176748 | A  | G   | -- | -- | IGR     | SNP | 0.415 | 24 | 17 |
| NRF1       | chr7 | 129361337 | A  | T   | -- | -- | Intron  | SNP | 0.182 | 18 | 4  |
| UBE2H      | chr7 | 129473795 | C  | T   | -- | -- | 3'UTR   | SNP | 0.114 | 31 | 4  |
| UBE2H      | chr7 | 129570994 | G  | T   | -- | -- | Intron  | SNP | 0.277 | 34 | 13 |
| --         | chr7 | 129644675 | C  | G   | -- | -- | IGR     | SNP | 0.222 | 14 | 4  |
| TMEM209    | chr7 | 129823722 | C  | T   | -- | -- | Intron  | SNP | 0.231 | 30 | 9  |
| CPA4       | chr7 | 129942328 | C  | A   | -- | -- | Intron  | SNP | 0.222 | 14 | 4  |
| CPA4       | chr7 | 129963631 | C  | T   | -- | -- | 3'UTR   | SNP | 0.305 | 41 | 18 |
| --         | chr7 | 129967244 | G  | A   | -- | -- | IGR     | SNP | 0.174 | 19 | 4  |
| CPA1       | chr7 | 130028478 | G  | T   | -- | -- | 3'Flank | SNP | 0.273 | 24 | 9  |
| TSGA14     | chr7 | 130041550 | G  | A   | -- | -- | Intron  | SNP | 0.250 | 24 | 8  |
| --         | chr7 | 130407369 | C  | T   | -- | -- | IGR     | SNP | 0.286 | 35 | 14 |
| --         | chr7 | 130421306 | T  | A   | -- | -- | IGR     | SNP | 0.200 | 32 | 8  |
| --         | chr7 | 130621722 | A  | T   | -- | -- | IGR     | SNP | 0.271 | 35 | 13 |
| --         | chr7 | 131395676 | A  | T   | -- | -- | IGR     | SNP | 0.714 | 14 | 35 |
| --         | chr7 | 131685571 | G  | A   | -- | -- | IGR     | SNP | 0.186 | 48 | 11 |
| --         | chr7 | 131776865 | G  | T   | -- | -- | IGR     | SNP | 0.294 | 48 | 20 |
| PLXNA4     | chr7 | 132021675 | C  | G   | -- | -- | Intron  | SNP | 0.621 | 22 | 36 |
| PLXNA4     | chr7 | 132033708 | G  | A   | -- | -- | Intron  | SNP | 0.414 | 17 | 12 |
| PLXNA4     | chr7 | 132151551 | A  | C   | -- | -- | Intron  | SNP | 0.422 | 26 | 19 |
| PLXNA4     | chr7 | 132180080 | C  | A   | -- | -- | Intron  | SNP | 0.559 | 26 | 33 |
| PLXNA4     | chr7 | 132246459 | A  | C   | -- | -- | Intron  | SNP | 0.171 | 29 | 6  |
| --         | chr7 | 132785324 | A  | G   | -- | -- | IGR     | SNP | 0.146 | 35 | 6  |
| --         | chr7 | 132822306 | G  | A   | -- | -- | IGR     | SNP | 0.395 | 23 | 15 |
| --         | chr7 | 132898721 | G  | T   | -- | -- | IGR     | SNP | 0.188 | 13 | 3  |
| --         | chr7 | 132927449 | T  | A   | -- | -- | IGR     | SNP | 0.195 | 33 | 8  |
| EXOC4      | chr7 | 133133905 | A  | T   | -- | -- | Intron  | SNP | 0.171 | 29 | 6  |
| EXOC4      | chr7 | 133153029 | G  | A   | -- | -- | Intron  | SNP | 0.296 | 19 | 8  |
| EXOC4      | chr7 | 133172484 | -  | AC  | -- | -- | Intron  | INS | 0.105 | 34 | 4  |
| EXOC4      | chr7 | 133209421 | A  | G   | -- | -- | Intron  | SNP | 0.152 | 28 | 5  |
| EXOC4      | chr7 | 133231027 | C  | T   | -- | -- | Intron  | SNP | 0.118 | 30 | 4  |
| EXOC4      | chr7 | 133251335 | A  | C   | -- | -- | Intron  | SNP | 0.346 | 34 | 18 |
| EXOC4      | chr7 | 133329666 | T  | G   | -- | -- | Intron  | SNP | 0.188 | 39 | 9  |
| EXOC4      | chr7 | 133329667 | G  | T   | -- | -- | Intron  | SNP | 0.188 | 39 | 9  |
| EXOC4      | chr7 | 133573621 | A  | G   | -- | -- | Intron  | SNP | 0.514 | 17 | 18 |
| LRGUK      | chr7 | 133916386 | C  | T   | -- | -- | Intron  | SNP | 0.167 | 30 | 6  |
| --         | chr7 | 134175837 | C  | T   | -- | -- | IGR     | SNP | 0.254 | 44 | 15 |
| --         | chr7 | 134286821 | A  | G   | -- | -- | IGR     | SNP | 0.171 | 29 | 6  |
| CALD1      | chr7 | 134607508 | T  | C   | -- | -- | Intron  | SNP | 0.289 | 32 | 13 |
| AGBL3      | chr7 | 134818009 | T  | C   | -- | -- | Intron  | SNP | 0.286 | 30 | 12 |
| LUZP6,MTPN | chr7 | 135612214 | A  | T   | -- | -- | 5'UTR   | SNP | 0.324 | 23 | 11 |
| --         | chr7 | 135739380 | C  | A   | -- | -- | IGR     | SNP | 0.311 | 31 | 14 |
| --         | chr7 | 135742004 | G  | T   | -- | -- | IGR     | SNP | 0.211 | 15 | 4  |
| --         | chr7 | 135918595 | A  | T   | -- | -- | IGR     | SNP | 0.163 | 36 | 7  |
| --         | chr7 | 136115107 | T  | C   | -- | -- | IGR     | SNP | 0.375 | 20 | 12 |
| --         | chr7 | 136439734 | T  | C   | -- | -- | IGR     | SNP | 0.159 | 37 | 7  |
| --         | chr7 | 136481637 | -  | AAG | -- | -- | IGR     | INS | 0.125 | 14 | 2  |
| CHRM2      | chr7 | 136592826 | AT | -   | -- | -- | Intron  | DEL | 0.250 | 27 | 9  |
| CHRM2      | chr7 | 136674592 | A  | C   | -- | -- | Intron  | SNP | 0.325 | 27 | 13 |
| --         | chr7 | 136780697 | C  | G   | -- | -- | IGR     | SNP | 0.163 | 36 | 7  |
| --         | chr7 | 136885483 | C  | A   | -- | -- | IGR     | SNP | 0.300 | 35 | 15 |
| PTN        | chr7 | 136951303 | C  | T   | -- | -- | Intron  | SNP | 0.571 | 6  | 8  |
| PTN        | chr7 | 136988543 | T  | C   | -- | -- | Intron  | SNP | 0.111 | 40 | 5  |
| DGKI       | chr7 | 137129983 | G  | A   | -- | -- | Intron  | SNP | 0.383 | 29 | 18 |
| DGKI       | chr7 | 137131408 | G  | A   | -- | -- | Intron  | SNP | 0.140 | 49 | 8  |
| DGKI       | chr7 | 137144241 | G  | T   | -- | -- | Intron  | SNP | 0.333 | 8  | 4  |
| DGKI       | chr7 | 137310488 | T  | A   | -- | -- | Intron  | SNP | 0.294 | 12 | 5  |
| DGKI       | chr7 | 137412652 | G  | A   | -- | -- | Intron  | SNP | 0.634 | 15 | 26 |
| CREB3L2    | chr7 | 137600130 | G  | A   | -- | -- | Intron  | SNP | 0.455 | 12 | 10 |
| --         | chr7 | 137715722 | A  | T   | -- | -- | IGR     | SNP | 0.256 | 29 | 10 |
| --         | chr7 | 137872409 | C  | T   | -- | -- | IGR     | SNP | 0.238 | 16 | 5  |
| --         | chr7 | 137895596 | C  | A   | -- | -- | IGR     | SNP | 0.500 | 4  | 4  |
| SVOPL      | chr7 | 138294234 | C  | A   | -- | -- | Intron  | SNP | 0.286 | 10 | 4  |
| SVOPL      | chr7 | 138343054 | G  | C   | -- | -- | Intron  | SNP | 0.349 | 28 | 15 |
| --         | chr7 | 138376470 | G  | A   | -- | -- | IGR     | SNP | 0.200 | 20 | 5  |
| KIAA1549   | chr7 | 138607388 | T  | A   | -- | -- | Intron  | SNP | 0.368 | 12 | 7  |
| --         | chr7 | 138668279 | G  | A   | -- | -- | IGR     | SNP | 0.273 | 16 | 6  |
| --         | chr7 | 138810320 | C  | A   | -- | -- | IGR     | SNP | 0.250 | 12 | 4  |

|                     |      |           |     |   |    |    |        |     |       |    |    |
|---------------------|------|-----------|-----|---|----|----|--------|-----|-------|----|----|
| --                  | chr7 | 139203680 | G   | A | -- | -- | IGR    | SNP | 0.354 | 31 | 17 |
| <i>TBXAS1</i>       | chr7 | 139595532 | G   | A | -- | -- | Intron | SNP | 0.361 | 39 | 22 |
| <i>MKRN1</i>        | chr7 | 140160105 | C   | T | -- | -- | Intron | SNP | 0.190 | 17 | 4  |
| --                  | chr7 | 140333686 | C   | G | -- | -- | IGR    | SNP | 0.150 | 34 | 6  |
| <i>ADCK2</i>        | chr7 | 140384754 | G   | A | -- | -- | Intron | SNP | 0.236 | 42 | 13 |
| --                  | chr7 | 140411516 | A   | T | -- | -- | IGR    | SNP | 0.385 | 8  | 5  |
| <i>BRAF</i>         | chr7 | 140434586 | G   | A | -- | -- | Intron | SNP | 0.412 | 10 | 7  |
| <i>LOC10050742</i>  | chr7 | 140905799 | T   | C | -- | -- | Intron | SNP | 0.553 | 21 | 26 |
| <i>AGK</i>          | chr7 | 141276741 | G   | A | -- | -- | Intron | SNP | 0.294 | 24 | 10 |
| --                  | chr7 | 141492554 | G   | A | -- | -- | IGR    | SNP | 0.396 | 29 | 19 |
| <i>MGAM</i>         | chr7 | 141791066 | G   | A | -- | -- | Intron | SNP | 0.103 | 35 | 4  |
| <i>LOC10012465</i>  | chr7 | 141888223 | G   | A | -- | -- | RNA    | SNP | 0.353 | 22 | 12 |
| --                  | chr7 | 142021952 | G   | A | -- | -- | IGR    | SNP | 0.593 | 11 | 16 |
| --                  | chr7 | 142189683 | C   | T | -- | -- | IGR    | SNP | 0.283 | 33 | 13 |
| --                  | chr7 | 142358530 | C   | G | -- | -- | IGR    | SNP | 0.488 | 21 | 20 |
| --                  | chr7 | 142603535 | G   | T | -- | -- | IGR    | SNP | 0.300 | 28 | 12 |
| <i>TRPV5</i>        | chr7 | 142609237 | C   | T | -- | -- | Intron | SNP | 0.438 | 27 | 21 |
| <i>KEL</i>          | chr7 | 142644872 | A   | G | -- | -- | Intron | SNP | 0.200 | 32 | 8  |
| --                  | chr7 | 142786564 | C   | T | -- | -- | IGR    | SNP | 0.115 | 23 | 3  |
| --                  | chr7 | 142786584 | A   | G | -- | -- | IGR    | SNP | 0.111 | 24 | 3  |
| --                  | chr7 | 142867840 | T   | A | -- | -- | IGR    | SNP | 0.327 | 35 | 17 |
| <i>CLCN1</i>        | chr7 | 143018046 | C   | G | -- | -- | Intron | SNP | 0.143 | 48 | 8  |
| --                  | chr7 | 143712473 | G   | T | -- | -- | IGR    | SNP | 0.333 | 26 | 13 |
| --                  | chr7 | 143842831 | G   | A | -- | -- | IGR    | SNP | 0.378 | 28 | 17 |
| --                  | chr7 | 143901056 | G   | A | -- | -- | IGR    | SNP | 0.143 | 24 | 4  |
| --                  | chr7 | 144024697 | C   | T | -- | -- | IGR    | SNP | 0.138 | 50 | 8  |
| <i>TPK1</i>         | chr7 | 144202843 | G   | A | -- | -- | Intron | SNP | 0.145 | 53 | 9  |
| <i>TPK1</i>         | chr7 | 144333164 | GC  | - | -- | -- | Intron | DEL | 0.682 | 14 | 30 |
| --                  | chr7 | 144542965 | C   | G | -- | -- | IGR    | SNP | 0.294 | 24 | 10 |
| --                  | chr7 | 144557394 | A   | C | -- | -- | IGR    | SNP | 0.531 | 15 | 17 |
| --                  | chr7 | 144859252 | C   | A | -- | -- | IGR    | SNP | 0.146 | 35 | 6  |
| --                  | chr7 | 144883541 | C   | G | -- | -- | IGR    | SNP | 0.706 | 15 | 36 |
| --                  | chr7 | 145197932 | C   | T | -- | -- | IGR    | SNP | 0.500 | 16 | 16 |
| --                  | chr7 | 145393232 | G   | C | -- | -- | IGR    | SNP | 0.500 | 23 | 23 |
| --                  | chr7 | 145443294 | C   | A | -- | -- | IGR    | SNP | 0.115 | 23 | 3  |
| --                  | chr7 | 145626025 | A   | T | -- | -- | IGR    | SNP | 0.424 | 19 | 14 |
| --                  | chr7 | 145688344 | T   | G | -- | -- | IGR    | SNP | 0.174 | 38 | 8  |
| --                  | chr7 | 145740196 | A   | G | -- | -- | IGR    | SNP | 0.250 | 18 | 6  |
| --                  | chr7 | 145740206 | C   | G | -- | -- | IGR    | SNP | 0.250 | 18 | 6  |
| --                  | chr7 | 145740211 | A   | C | -- | -- | IGR    | SNP | 0.192 | 21 | 5  |
| <i>CNTNAP2</i>      | chr7 | 145814185 | C   | T | -- | -- | Intron | SNP | 0.217 | 47 | 13 |
| <i>CNTNAP2</i>      | chr7 | 145842407 | G   | T | -- | -- | Intron | SNP | 0.542 | 22 | 26 |
| <i>CNTNAP2</i>      | chr7 | 145904729 | G   | T | -- | -- | Intron | SNP | 0.263 | 14 | 5  |
| <i>CNTNAP2</i>      | chr7 | 145942233 | T   | C | -- | -- | Intron | SNP | 0.133 | 26 | 4  |
| <i>CNTNAP2</i>      | chr7 | 145942238 | C   | T | -- | -- | Intron | SNP | 0.133 | 26 | 4  |
| <i>CNTNAP2</i>      | chr7 | 145963147 | A   | C | -- | -- | Intron | SNP | 0.200 | 40 | 10 |
| <i>CNTNAP2</i>      | chr7 | 145969442 | C   | T | -- | -- | Intron | SNP | 0.561 | 18 | 23 |
| <i>CNTNAP2</i>      | chr7 | 145993618 | G   | C | -- | -- | Intron | SNP | 0.214 | 33 | 9  |
| <i>CNTNAP2</i>      | chr7 | 146340683 | C   | T | -- | -- | Intron | SNP | 0.429 | 4  | 3  |
| <i>CNTNAP2</i>      | chr7 | 146392709 | G   | A | -- | -- | Intron | SNP | 0.231 | 20 | 6  |
| <i>CNTNAP2</i>      | chr7 | 146417585 | T   | A | -- | -- | Intron | SNP | 0.167 | 30 | 6  |
| <i>CNTNAP2</i>      | chr7 | 146486073 | G   | C | -- | -- | Intron | SNP | 0.311 | 31 | 14 |
| <i>CNTNAP2</i>      | chr7 | 146504267 | C   | A | -- | -- | Intron | SNP | 0.424 | 19 | 14 |
| <i>CNTNAP2</i>      | chr7 | 146760680 | G   | T | -- | -- | Intron | SNP | 0.185 | 22 | 5  |
| <i>CNTNAP2</i>      | chr7 | 146920405 | T   | C | -- | -- | Intron | SNP | 0.145 | 53 | 9  |
| <i>MIR548I4</i>     | chr7 | 147063216 | CTT | - | -- | -- | RNA    | DEL | 0.219 | 25 | 7  |
| <i>MIR548I4</i>     | chr7 | 147200789 | AAT | - | -- | -- | RNA    | DEL | 0.108 | 33 | 4  |
| <i>CNTNAP2</i>      | chr7 | 147320844 | T   | A | -- | -- | Intron | SNP | 0.192 | 21 | 5  |
| <i>CNTNAP2</i>      | chr7 | 147374405 | A   | C | -- | -- | Intron | SNP | 0.243 | 28 | 9  |
| <i>CNTNAP2</i>      | chr7 | 147375687 | G   | A | -- | -- | Intron | SNP | 0.152 | 28 | 5  |
| <i>CNTNAP2</i>      | chr7 | 147495290 | A   | T | -- | -- | Intron | SNP | 0.478 | 24 | 22 |
| <i>CNTNAP2</i>      | chr7 | 147504911 | C   | G | -- | -- | Intron | SNP | 0.214 | 22 | 6  |
| <i>CNTNAP2</i>      | chr7 | 147505107 | A   | G | -- | -- | Intron | SNP | 0.107 | 25 | 3  |
| <i>CNTNAP2</i>      | chr7 | 147564317 | T   | A | -- | -- | Intron | SNP | 0.519 | 13 | 14 |
| <i>MIR548F3</i>     | chr7 | 147599936 | A   | G | -- | -- | RNA    | SNP | 0.167 | 20 | 4  |
| <i>MIR548F3,MII</i> | chr7 | 147632543 | G   | A | -- | -- | RNA    | SNP | 0.379 | 18 | 11 |
| <i>MIR548F3,MII</i> | chr7 | 147779668 | C   | G | -- | -- | RNA    | SNP | 0.167 | 45 | 9  |
| <i>MIR548T</i>      | chr7 | 147916028 | C   | T | -- | -- | RNA    | SNP | 0.148 | 23 | 4  |
| --                  | chr7 | 148276924 | G   | A | -- | -- | IGR    | SNP | 0.210 | 49 | 13 |
| <i>ZNF398</i>       | chr7 | 148824661 | T   | A | -- | -- | Intron | SNP | 0.167 | 15 | 3  |
| --                  | chr7 | 148883382 | G   | T | -- | -- | IGR    | SNP | 0.188 | 13 | 3  |
| <i>ZNF282</i>       | chr7 | 148909870 | C   | T | -- | -- | Intron | SNP | 0.714 | 12 | 30 |
| <i>ZNF282</i>       | chr7 | 148916945 | G   | A | -- | -- | Intron | SNP | 0.328 | 39 | 19 |
| --                  | chr7 | 149389901 | C   | T | -- | -- | IGR    | SNP | 0.256 | 29 | 10 |
| --                  | chr7 | 149665400 | T   | C | -- | -- | IGR    | SNP | 0.132 | 33 | 5  |
| --                  | chr7 | 149738515 | G   | T | -- | -- | IGR    | SNP | 0.118 | 30 | 4  |
| --                  | chr7 | 149871359 | T   | C | -- | -- | IGR    | SNP | 0.119 | 37 | 5  |
| --                  | chr7 | 149890457 | T   | C | -- | -- | IGR    | SNP | 0.156 | 27 | 5  |
| --                  | chr7 | 149897418 | AT  | - | -- | -- | IGR    | DEL | 0.125 | 28 | 4  |
| --                  | chr7 | 149899799 | G   | C | -- | -- | IGR    | SNP | 0.217 | 36 | 10 |

|           |      |           |       |     |    |    |        |     |       |    |    |
|-----------|------|-----------|-------|-----|----|----|--------|-----|-------|----|----|
| ACTR3C    | chr7 | 149994247 | TA    | -   | -- | -- | Intron | DEL | 0.148 | 23 | 4  |
| LOC728743 | chr7 | 150106072 | G     | T   | -- | -- | RNA    | SNP | 0.262 | 45 | 16 |
| --        | chr7 | 150182624 | G     | T   | -- | -- | IGR    | SNP | 0.286 | 10 | 4  |
| GIMAP7    | chr7 | 150216842 | T     | A   | -- | -- | Intron | SNP | 0.161 | 26 | 5  |
| --        | chr7 | 150227354 | G     | C   | -- | -- | IGR    | SNP | 0.125 | 21 | 3  |
| --        | chr7 | 151008687 | C     | A   | -- | -- | IGR    | SNP | 0.157 | 43 | 8  |
| --        | chr7 | 151015023 | G     | A   | -- | -- | IGR    | SNP | 0.174 | 19 | 4  |
| --        | chr7 | 151033663 | A     | T   | -- | -- | IGR    | SNP | 0.125 | 28 | 4  |
| NUB1      | chr7 | 151063826 | C     | T   | -- | -- | Intron | SNP | 0.282 | 28 | 11 |
| PRKAG2    | chr7 | 151349717 | C     | A   | -- | -- | Intron | SNP | 0.265 | 25 | 9  |
| PRKAG2    | chr7 | 151442619 | C     | G   | -- | -- | Intron | SNP | 0.605 | 32 | 49 |
| PRKAG2    | chr7 | 151484667 | A     | G   | -- | -- | Intron | SNP | 0.323 | 44 | 21 |
| GALNT11   | chr7 | 151758774 | T     | A   | -- | -- | Intron | SNP | 0.273 | 8  | 3  |
| GALNT11   | chr7 | 151788278 | G     | T   | -- | -- | Intron | SNP | 0.474 | 10 | 9  |
| MLL3      | chr7 | 151919852 | T     | A   | -- | -- | Intron | SNP | 0.100 | 45 | 5  |
| MLL3      | chr7 | 151927507 | G     | T   | -- | -- | Intron | SNP | 0.189 | 43 | 10 |
| MLL3      | chr7 | 151927526 | A     | G   | -- | -- | Intron | SNP | 0.192 | 42 | 10 |
| MLL3      | chr7 | 151982341 | AG    | -   | -- | -- | Intron | DEL | 0.141 | 79 | 13 |
| MLL3      | chr7 | 152075643 | C     | T   | -- | -- | Intron | SNP | 0.140 | 74 | 12 |
| MLL3      | chr7 | 152088808 | -     | TA  | -- | -- | Intron | INS | 0.238 | 32 | 10 |
| MLL3      | chr7 | 152110380 | T     | G   | -- | -- | Intron | SNP | 0.182 | 45 | 10 |
| --        | chr7 | 152430526 | C     | T   | -- | -- | IGR    | SNP | 0.167 | 50 | 10 |
| ACTR3B    | chr7 | 152467871 | C     | A   | -- | -- | Intron | SNP | 0.211 | 15 | 4  |
| ACTR3B    | chr7 | 152492264 | C     | G   | -- | -- | Intron | SNP | 0.233 | 23 | 7  |
| --        | chr7 | 152619993 | C     | G   | -- | -- | IGR    | SNP | 0.618 | 21 | 34 |
| --        | chr7 | 152861783 | A     | G   | -- | -- | IGR    | SNP | 0.590 | 16 | 23 |
| --        | chr7 | 152919026 | G     | T   | -- | -- | IGR    | SNP | 0.244 | 34 | 11 |
| --        | chr7 | 153101890 | C     | T   | -- | -- | IGR    | SNP | 0.596 | 21 | 31 |
| --        | chr7 | 153176393 | A     | T   | -- | -- | IGR    | SNP | 0.323 | 42 | 20 |
| --        | chr7 | 153307423 | A     | G   | -- | -- | IGR    | SNP | 0.489 | 23 | 22 |
| --        | chr7 | 153333503 | C     | G   | -- | -- | IGR    | SNP | 0.294 | 24 | 10 |
| --        | chr7 | 153363690 | T     | C   | -- | -- | IGR    | SNP | 0.195 | 33 | 8  |
| --        | chr7 | 153422163 | G     | A   | -- | -- | IGR    | SNP | 0.106 | 42 | 5  |
| --        | chr7 | 153464636 | G     | T   | -- | -- | IGR    | SNP | 0.467 | 8  | 7  |
| --        | chr7 | 153513435 | -     | AC  | -- | -- | IGR    | INS | 0.129 | 27 | 4  |
| DPP6      | chr7 | 153635871 | A     | G   | -- | -- | Intron | SNP | 0.462 | 28 | 24 |
| DPP6      | chr7 | 153721673 | C     | T   | -- | -- | Intron | SNP | 0.154 | 55 | 10 |
| DPP6      | chr7 | 153725198 | C     | G   | -- | -- | Intron | SNP | 0.116 | 38 | 5  |
| DPP6      | chr7 | 153759919 | C     | T   | -- | -- | Intron | SNP | 0.630 | 10 | 17 |
| DPP6      | chr7 | 154020155 | A     | G   | -- | -- | Intron | SNP | 0.104 | 43 | 5  |
| DPP6      | chr7 | 154259001 | G     | T   | -- | -- | Intron | SNP | 0.276 | 21 | 8  |
| DPP6      | chr7 | 154661749 | G     | C   | -- | -- | Intron | SNP | 0.143 | 18 | 3  |
| --        | chr7 | 154800173 | A     | G   | -- | -- | IGR    | SNP | 0.209 | 53 | 14 |
| --        | chr7 | 154829645 | G     | C   | -- | -- | IGR    | SNP | 0.133 | 26 | 4  |
| --        | chr7 | 154934587 | C     | T   | -- | -- | IGR    | SNP | 0.340 | 35 | 18 |
| --        | chr7 | 154958046 | G     | T   | -- | -- | IGR    | SNP | 0.105 | 51 | 6  |
| --        | chr7 | 154960822 | C     | A   | -- | -- | IGR    | SNP | 0.250 | 48 | 16 |
| --        | chr7 | 155127666 | T     | C   | -- | -- | IGR    | SNP | 0.233 | 33 | 10 |
| --        | chr7 | 155167933 | G     | A   | -- | -- | IGR    | SNP | 0.315 | 37 | 17 |
| --        | chr7 | 155170713 | C     | T   | -- | -- | IGR    | SNP | 0.488 | 22 | 21 |
| --        | chr7 | 155408511 | T     | C   | -- | -- | IGR    | SNP | 0.161 | 26 | 5  |
| --        | chr7 | 155408871 | G     | T   | -- | -- | IGR    | SNP | 0.292 | 17 | 7  |
| --        | chr7 | 155408873 | C     | T   | -- | -- | IGR    | SNP | 0.304 | 16 | 7  |
| --        | chr7 | 155409094 | G     | A   | -- | -- | IGR    | SNP | 0.179 | 32 | 7  |
| --        | chr7 | 155410192 | G     | A   | -- | -- | IGR    | SNP | 0.146 | 41 | 7  |
| --        | chr7 | 155613782 | T     | G   | -- | -- | IGR    | SNP | 0.356 | 29 | 16 |
| --        | chr7 | 155759291 | TAG   | -   | -- | -- | IGR    | DEL | 0.282 | 28 | 11 |
| --        | chr7 | 155786162 | C     | G   | -- | -- | IGR    | SNP | 0.159 | 53 | 10 |
| --        | chr7 | 155830908 | C     | T   | -- | -- | IGR    | SNP | 0.627 | 19 | 32 |
| --        | chr7 | 155948448 | G     | A   | -- | -- | IGR    | SNP | 0.129 | 27 | 4  |
| --        | chr7 | 156000711 | -     | GTA | -- | -- | IGR    | INS | 0.200 | 16 | 4  |
| --        | chr7 | 156011957 | G     | C   | -- | -- | IGR    | SNP | 0.208 | 38 | 10 |
| --        | chr7 | 156270506 | G     | A   | -- | -- | IGR    | SNP | 0.180 | 41 | 9  |
| --        | chr7 | 156290451 | C     | A   | -- | -- | IGR    | SNP | 0.135 | 32 | 5  |
| LMBR1     | chr7 | 156639409 | G     | C   | -- | -- | Intron | SNP | 0.250 | 36 | 12 |
| LMBR1     | chr7 | 156639855 | G     | C   | -- | -- | Intron | SNP | 0.267 | 33 | 12 |
| --        | chr7 | 156707980 | G     | A   | -- | -- | IGR    | SNP | 0.568 | 16 | 21 |
| --        | chr7 | 156722967 | A     | C   | -- | -- | IGR    | SNP | 0.122 | 36 | 5  |
| NOM1      | chr7 | 156750495 | G     | A   | -- | -- | Intron | SNP | 0.190 | 17 | 4  |
| --        | chr7 | 156923797 | GTCTC | -   | -- | -- | IGR    | DEL | 0.143 | 18 | 3  |
| UBE3C     | chr7 | 157052082 | G     | A   | -- | -- | Intron | SNP | 0.254 | 50 | 17 |
| --        | chr7 | 157097623 | C     | T   | -- | -- | IGR    | SNP | 0.589 | 23 | 33 |
| PTPRN2    | chr7 | 157355933 | G     | A   | -- | -- | Intron | SNP | 0.134 | 97 | 15 |
| PTPRN2    | chr7 | 157524565 | T     | C   | -- | -- | Intron | SNP | 0.192 | 21 | 5  |
| PTPRN2    | chr7 | 157851024 | T     | C   | -- | -- | Intron | SNP | 0.146 | 35 | 6  |
| PTPRN2    | chr7 | 157851344 | C     | A   | -- | -- | Intron | SNP | 0.200 | 20 | 5  |
| PTPRN2    | chr7 | 157852931 | A     | C   | -- | -- | Intron | SNP | 0.125 | 49 | 7  |
| PTPRN2    | chr7 | 157945719 | G     | A   | -- | -- | Intron | SNP | 0.189 | 30 | 7  |
| PTPRN2    | chr7 | 158122940 | C     | G   | -- | -- | Intron | SNP | 0.175 | 33 | 7  |
| PTPRN2    | chr7 | 158135124 | A     | G   | -- | -- | Intron | SNP | 0.162 | 62 | 12 |

|                   |      |           |     |    |        |       |        |     |       |    |    |
|-------------------|------|-----------|-----|----|--------|-------|--------|-----|-------|----|----|
| <i>PTPRN2</i>     | chr7 | 158356603 | A   | T  | --     | --    | Intron | SNP | 0.160 | 42 | 8  |
| --                | chr7 | 158406683 | T   | A  | --     | --    | IGR    | SNP | 0.152 | 28 | 5  |
| --                | chr7 | 158625202 | G   | A  | --     | --    | IGR    | SNP | 0.309 | 38 | 17 |
| --                | chr7 | 158632058 | G   | A  | --     | --    | IGR    | SNP | 0.104 | 43 | 5  |
| --                | chr7 | 158790893 | T   | G  | --     | --    | IGR    | SNP | 0.444 | 5  | 4  |
| --                | chr7 | 158990728 | G   | C  | --     | --    | IGR    | SNP | 0.528 | 25 | 28 |
| --                | chr8 | 45631     | T   | C  | --     | --    | IGR    | SNP | 0.143 | 24 | 4  |
| --                | chr8 | 97109     | A   | G  | --     | --    | IGR    | SNP | 0.294 | 12 | 5  |
| --                | chr8 | 97296     | A   | G  | --     | --    | IGR    | SNP | 0.273 | 8  | 3  |
| --                | chr8 | 120464    | CT  | -  | --     | --    | IGR    | DEL | 0.105 | 34 | 4  |
| --                | chr8 | 232446    | C   | T  | --     | --    | IGR    | SNP | 0.333 | 10 | 5  |
| --                | chr8 | 252035    | C   | T  | --     | --    | IGR    | SNP | 0.136 | 51 | 8  |
| --                | chr8 | 253725    | C   | T  | --     | --    | IGR    | SNP | 0.182 | 27 | 6  |
| --                | chr8 | 253921    | T   | C  | --     | --    | IGR    | SNP | 0.300 | 7  | 3  |
| --                | chr8 | 325316    | T   | G  | --     | --    | IGR    | SNP | 0.250 | 18 | 6  |
| --                | chr8 | 327538    | T   | A  | --     | --    | IGR    | SNP | 0.118 | 30 | 4  |
| <i>FBXO25</i>     | chr8 | 391939    | -   | CA | --     | --    | Intron | INS | 0.120 | 22 | 3  |
| --                | chr8 | 560953    | C   | A  | --     | --    | IGR    | SNP | 0.263 | 14 | 5  |
| --                | chr8 | 605008    | T   | C  | --     | --    | IGR    | SNP | 0.419 | 18 | 13 |
| --                | chr8 | 693405    | A   | G  | --     | --    | IGR    | SNP | 0.400 | 18 | 12 |
| --                | chr8 | 701650    | T   | C  | --     | --    | IGR    | SNP | 0.368 | 12 | 7  |
| --                | chr8 | 963741    | G   | A  | --     | --    | IGR    | SNP | 0.310 | 20 | 9  |
| --                | chr8 | 965139    | C   | T  | --     | --    | IGR    | SNP | 0.412 | 10 | 7  |
| --                | chr8 | 1078189   | C   | G  | --     | --    | IGR    | SNP | 0.222 | 21 | 6  |
| --                | chr8 | 1088649   | C   | A  | --     | --    | IGR    | SNP | 0.767 | 7  | 23 |
| --                | chr8 | 1186042   | TTC | -  | --     | --    | IGR    | DEL | 0.263 | 14 | 5  |
| --                | chr8 | 1355226   | C   | T  | --     | --    | IGR    | SNP | 0.122 | 36 | 5  |
| --                | chr8 | 1355305   | AC  | -  | --     | --    | IGR    | DEL | 0.109 | 41 | 5  |
| --                | chr8 | 1398564   | C   | T  | --     | --    | IGR    | SNP | 0.333 | 40 | 20 |
| --                | chr8 | 1398611   | C   | T  | --     | --    | IGR    | SNP | 0.208 | 38 | 10 |
| <i>DLGAP2</i>     | chr8 | 1576854   | C   | T  | --     | --    | Intron | SNP | 0.769 | 6  | 20 |
| <i>ARHGEF10</i>   | chr8 | 1788485   | T   | C  | --     | --    | Intron | SNP | 0.160 | 21 | 4  |
| <i>ARHGEF10</i>   | chr8 | 1856694   | G   | A  | --     | --    | Intron | SNP | 0.444 | 15 | 12 |
| --                | chr8 | 1990108   | C   | A  | --     | --    | IGR    | SNP | 0.385 | 24 | 15 |
| --                | chr8 | 2139204   | C   | A  | --     | --    | IGR    | SNP | 0.370 | 17 | 10 |
| --                | chr8 | 2194472   | G   | C  | --     | --    | IGR    | SNP | 0.264 | 39 | 14 |
| --                | chr8 | 2207308   | GC  | -  | --     | --    | IGR    | DEL | 0.488 | 42 | 40 |
| --                | chr8 | 2324870   | T   | G  | --     | --    | IGR    | SNP | 0.429 | 4  | 3  |
| --                | chr8 | 2471363   | C   | T  | --     | --    | IGR    | SNP | 0.917 | 2  | 22 |
| --                | chr8 | 2769988   | A   | T  | --     | --    | IGR    | SNP | 0.786 | 3  | 11 |
| <i>CSMD1</i>      | chr8 | 2949952   | T   | A  | --     | --    | Intron | SNP | 0.789 | 4  | 15 |
| <i>CSMD1</i>      | chr8 | 2990049   | G   | A  | --     | --    | Intron | SNP | 0.111 | 24 | 3  |
| <i>CSMD1</i>      | chr8 | 3299089   | C   | T  | --     | --    | Intron | SNP | 0.444 | 10 | 8  |
| <i>CSMD1</i>      | chr8 | 3331381   | G   | C  | --     | --    | Intron | SNP | 0.129 | 27 | 4  |
| <i>CSMD1</i>      | chr8 | 3336549   | G   | A  | --     | --    | Intron | SNP | 0.333 | 10 | 5  |
| <i>CSMD1</i>      | chr8 | 3915643   | G   | T  | --     | --    | Intron | SNP | 0.429 | 8  | 6  |
| <i>CSMD1</i>      | chr8 | 4345273   | C   | A  | --     | --    | Intron | SNP | 0.524 | 10 | 11 |
| <i>CSMD1</i>      | chr8 | 4573615   | G   | A  | --     | --    | Intron | SNP | 0.161 | 26 | 5  |
| <i>CSMD1</i>      | chr8 | 4588981   | G   | A  | --     | --    | Intron | SNP | 0.900 | 3  | 27 |
| <i>CSMD1</i>      | chr8 | 4632419   | C   | T  | --     | --    | Intron | SNP | 0.839 | 5  | 26 |
| <i>CSMD1</i>      | chr8 | 4713331   | G   | T  | --     | --    | Intron | SNP | 0.462 | 7  | 6  |
| --                | chr8 | 4940375   | C   | T  | --     | --    | IGR    | SNP | 0.700 | 3  | 7  |
| --                | chr8 | 4945424   | T   | A  | --     | --    | IGR    | SNP | 0.586 | 12 | 17 |
| --                | chr8 | 4993479   | G   | T  | --     | --    | IGR    | SNP | 0.842 | 3  | 16 |
| --                | chr8 | 5226911   | C   | A  | --     | --    | IGR    | SNP | 0.161 | 26 | 5  |
| --                | chr8 | 5265896   | C   | T  | --     | --    | IGR    | SNP | 0.320 | 17 | 8  |
| --                | chr8 | 5389016   | G   | T  | --     | --    | IGR    | SNP | 0.429 | 12 | 9  |
| --                | chr8 | 5429683   | G   | T  | --     | --    | IGR    | SNP | 0.250 | 9  | 3  |
| --                | chr8 | 5857107   | A   | C  | --     | --    | IGR    | SNP | 0.211 | 15 | 4  |
| --                | chr8 | 5893413   | G   | A  | --     | --    | IGR    | SNP | 0.375 | 15 | 9  |
| --                | chr8 | 6081837   | C   | A  | --     | --    | IGR    | SNP | 0.333 | 8  | 4  |
| <i>MCPH1</i>      | chr8 | 6312749   | G   | A  | G1911A | L637L | Silent | SNP | 0.929 | 2  | 26 |
| <i>ANGPT2,MCF</i> | chr8 | 6372912   | G   | T  | --     | --    | Intron | SNP | 0.472 | 19 | 17 |
| --                | chr8 | 6726383   | C   | T  | --     | --    | IGR    | SNP | 0.364 | 7  | 4  |
| --                | chr8 | 6747494   | A   | G  | --     | --    | IGR    | SNP | 0.444 | 5  | 4  |
| --                | chr8 | 6963918   | TC  | -  | --     | --    | IGR    | DEL | 0.121 | 29 | 4  |
| --                | chr8 | 7002521   | G   | T  | --     | --    | IGR    | SNP | 0.238 | 16 | 5  |
| --                | chr8 | 7006315   | G   | A  | --     | --    | IGR    | SNP | 0.188 | 26 | 6  |
| --                | chr8 | 7006516   | T   | G  | --     | --    | IGR    | SNP | 0.172 | 24 | 5  |
| --                | chr8 | 7006558   | T   | C  | --     | --    | IGR    | SNP | 0.185 | 22 | 5  |
| --                | chr8 | 7006559   | G   | A  | --     | --    | IGR    | SNP | 0.179 | 23 | 5  |
| --                | chr8 | 7043423   | -   | TG | --     | --    | IGR    | INS | 0.176 | 14 | 3  |
| --                | chr8 | 7238576   | C   | A  | --     | --    | IGR    | SNP | 0.389 | 11 | 7  |
| --                | chr8 | 7623638   | A   | C  | --     | --    | IGR    | SNP | 0.429 | 8  | 6  |
| --                | chr8 | 7632222   | T   | C  | --     | --    | IGR    | SNP | 0.154 | 22 | 4  |
| --                | chr8 | 7632225   | G   | A  | --     | --    | IGR    | SNP | 0.154 | 22 | 4  |
| --                | chr8 | 7876735   | G   | C  | --     | --    | IGR    | SNP | 0.160 | 21 | 4  |
| --                | chr8 | 7877352   | C   | T  | --     | --    | IGR    | SNP | 0.127 | 55 | 8  |
| --                | chr8 | 7884224   | C   | T  | --     | --    | IGR    | SNP | 0.151 | 45 | 8  |
| <i>FLJ10661</i>   | chr8 | 8096508   | G   | A  | --     | --    | RNA    | SNP | 0.171 | 29 | 6  |



|             |      |          |     |    |       |       |                |     |       |    |    |
|-------------|------|----------|-----|----|-------|-------|----------------|-----|-------|----|----|
| FLJ10661    | chr8 | 8096519  | T   | C  | --    | --    | RNA            | SNP | 0.226 | 24 | 7  |
| --          | chr8 | 8379633  | T   | A  | --    | --    | IGR            | SNP | 0.296 | 19 | 8  |
| PPP1R3B     | chr8 | 9002475  | C   | G  | --    | --    | Intron         | SNP | 0.600 | 6  | 9  |
| --          | chr8 | 9112431  | C   | G  | --    | --    | IGR            | SNP | 0.286 | 25 | 10 |
| --          | chr8 | 9299870  | T   | C  | --    | --    | IGR            | SNP | 0.750 | 1  | 3  |
| TNKS        | chr8 | 9566870  | C   | G  | --    | --    | Intron         | SNP | 0.952 | 1  | 20 |
| --          | chr8 | 9767248  | A   | G  | --    | --    | IGR            | SNP | 0.679 | 9  | 19 |
| XKR6        | chr8 | 10814952 | G   | T  | --    | --    | Intron         | SNP | 0.425 | 23 | 17 |
| XKR6        | chr8 | 10892344 | G   | A  | --    | --    | Intron         | SNP | 0.520 | 24 | 26 |
| XKR6        | chr8 | 10999434 | G   | T  | --    | --    | Intron         | SNP | 0.409 | 13 | 9  |
| SLC35G5     | chr8 | 11190270 | G   | A  | --    | --    | 3'Flank        | SNP | 0.273 | 16 | 6  |
| BLK         | chr8 | 11376495 | G   | T  | --    | --    | Intron         | SNP | 0.714 | 12 | 30 |
| --          | chr8 | 11465091 | A   | T  | --    | --    | IGR            | SNP | 0.571 | 18 | 24 |
| --          | chr8 | 11870145 | C   | T  | --    | --    | IGR            | SNP | 0.632 | 7  | 12 |
| FAM66D      | chr8 | 11991946 | G   | C  | --    | --    | RNA            | SNP | 0.333 | 10 | 5  |
| FAM66D      | chr8 | 11992877 | T   | G  | --    | --    | RNA            | SNP | 0.154 | 22 | 4  |
| --          | chr8 | 12057801 | G   | C  | --    | --    | IGR            | SNP | 0.100 | 45 | 5  |
| --          | chr8 | 12068301 | A   | C  | --    | --    | IGR            | SNP | 0.500 | 5  | 5  |
| LOC10050695 | chr8 | 12299386 | A   | G  | --    | --    | RNA            | SNP | 0.185 | 22 | 5  |
| LOC10050695 | chr8 | 12301125 | TG  | -  | --    | --    | RNA            | DEL | 0.125 | 21 | 3  |
| LOC10050695 | chr8 | 12314898 | G   | A  | --    | --    | RNA            | SNP | 0.667 | 7  | 14 |
| LOC10050695 | chr8 | 12417906 | G   | A  | --    | --    | RNA            | SNP | 0.286 | 5  | 2  |
| DLC1        | chr8 | 13021845 | G   | A  | --    | --    | Intron         | SNP | 0.375 | 10 | 6  |
| --          | chr8 | 13655563 | C   | T  | --    | --    | IGR            | SNP | 0.857 | 5  | 30 |
| --          | chr8 | 13704508 | T   | C  | --    | --    | IGR            | SNP | 0.267 | 11 | 4  |
| --          | chr8 | 13788654 | T   | A  | --    | --    | IGR            | SNP | 0.300 | 21 | 9  |
| --          | chr8 | 13844976 | G   | T  | --    | --    | IGR            | SNP | 0.318 | 15 | 7  |
| SGCZ        | chr8 | 13960560 | G   | T  | --    | --    | Intron         | SNP | 0.800 | 5  | 20 |
| SGCZ        | chr8 | 13972496 | T   | C  | --    | --    | Intron         | SNP | 0.464 | 15 | 13 |
| SGCZ        | chr8 | 14144713 | TTA | -  | --    | --    | Intron         | DEL | 0.118 | 15 | 2  |
| SGCZ        | chr8 | 14290452 | G   | A  | --    | --    | Intron         | SNP | 0.333 | 8  | 4  |
| SGCZ        | chr8 | 14614890 | A   | T  | --    | --    | Intron         | SNP | 0.250 | 24 | 8  |
| SGCZ        | chr8 | 14705523 | A   | C  | --    | --    | Intron         | SNP | 0.250 | 12 | 4  |
| SGCZ        | chr8 | 14855483 | A   | T  | --    | --    | Intron         | SNP | 0.514 | 18 | 19 |
| SGCZ        | chr8 | 14891825 | G   | T  | --    | --    | Intron         | SNP | 0.409 | 13 | 9  |
| SGCZ        | chr8 | 14982744 | ACT | -  | --    | --    | Intron         | DEL | 0.364 | 14 | 8  |
| TUSC3       | chr8 | 15445886 | C   | G  | --    | --    | Intron         | SNP | 0.781 | 7  | 25 |
| TUSC3       | chr8 | 15446118 | C   | G  | --    | --    | Intron         | SNP | 0.792 | 5  | 19 |
| --          | chr8 | 15697360 | A   | G  | --    | --    | IGR            | SNP | 0.125 | 21 | 3  |
| --          | chr8 | 16161225 | C   | A  | --    | --    | IGR            | SNP | 0.500 | 14 | 14 |
| --          | chr8 | 16298518 | -   | TA | --    | --    | IGR            | INS | 0.429 | 12 | 9  |
| --          | chr8 | 16565325 | CAT | -  | --    | --    | IGR            | DEL | 0.160 | 21 | 4  |
| MTUS1       | chr8 | 17599533 | G   | C  | --    | --    | Intron         | SNP | 0.911 | 4  | 41 |
| --          | chr8 | 17713913 | G   | A  | --    | --    | IGR            | SNP | 0.222 | 35 | 10 |
| --          | chr8 | 18008644 | G   | A  | --    | --    | IGR            | SNP | 0.267 | 11 | 4  |
| NAT1        | chr8 | 18044648 | C   | A  | --    | --    | Intron         | SNP | 0.811 | 7  | 30 |
| --          | chr8 | 18200539 | G   | T  | --    | --    | IGR            | SNP | 0.174 | 19 | 4  |
| --          | chr8 | 18327008 | T   | A  | --    | --    | IGR            | SNP | 0.194 | 25 | 6  |
| --          | chr8 | 18327016 | A   | G  | --    | --    | IGR            | SNP | 0.194 | 25 | 6  |
| PSD3        | chr8 | 18594838 | TTG | -  | --    | --    | Intron         | DEL | 0.118 | 15 | 2  |
| PSD3        | chr8 | 18661305 | AG  | -  | --    | --    | Intron         | DEL | 0.238 | 16 | 5  |
| PSD3        | chr8 | 18689790 | G   | A  | --    | --    | Intron         | SNP | 0.889 | 3  | 24 |
| PSD3        | chr8 | 18729560 | G   | A  | C814T | Q272X | Nonsense_mutat | SNP | 0.100 | 27 | 3  |
| PSD3        | chr8 | 18852336 | G   | A  | --    | --    | Intron         | SNP | 0.840 | 4  | 21 |
| PSD3        | chr8 | 18852949 | G   | C  | --    | --    | Intron         | SNP | 0.864 | 3  | 19 |
| --          | chr8 | 18964615 | T   | A  | --    | --    | IGR            | SNP | 0.500 | 9  | 9  |
| SH2D4A      | chr8 | 19198116 | T   | C  | --    | --    | Intron         | SNP | 0.571 | 3  | 4  |
| INTS10      | chr8 | 19688081 | G   | A  | --    | --    | Intron         | SNP | 0.771 | 8  | 27 |
| --          | chr8 | 19773007 | C   | G  | --    | --    | IGR            | SNP | 0.565 | 30 | 39 |
| --          | chr8 | 19773406 | C   | G  | --    | --    | IGR            | SNP | 0.750 | 25 | 75 |
| --          | chr8 | 19773791 | C   | A  | --    | --    | IGR            | SNP | 0.647 | 42 | 77 |
| --          | chr8 | 19774488 | C   | A  | --    | --    | IGR            | SNP | 0.735 | 26 | 72 |
| --          | chr8 | 19774579 | C   | G  | --    | --    | IGR            | SNP | 0.691 | 30 | 67 |
| --          | chr8 | 19774652 | C   | G  | --    | --    | IGR            | SNP | 0.752 | 31 | 94 |
| --          | chr8 | 19775660 | C   | G  | --    | --    | IGR            | SNP | 0.702 | 28 | 66 |
| --          | chr8 | 19775946 | C   | G  | --    | --    | IGR            | SNP | 0.724 | 27 | 71 |
| --          | chr8 | 19775956 | C   | T  | --    | --    | IGR            | SNP | 0.680 | 33 | 70 |
| --          | chr8 | 19776760 | C   | G  | --    | --    | IGR            | SNP | 0.585 | 27 | 38 |
| --          | chr8 | 19776787 | C   | T  | --    | --    | IGR            | SNP | 0.604 | 21 | 32 |
| --          | chr8 | 19776802 | C   | T  | --    | --    | IGR            | SNP | 0.677 | 21 | 44 |
| --          | chr8 | 19776935 | C   | G  | --    | --    | IGR            | SNP | 0.782 | 24 | 86 |
| --          | chr8 | 19777236 | C   | G  | --    | --    | IGR            | SNP | 0.725 | 28 | 74 |
| --          | chr8 | 19779043 | C   | G  | --    | --    | IGR            | SNP | 0.661 | 21 | 41 |
| --          | chr8 | 19779334 | C   | T  | --    | --    | IGR            | SNP | 0.720 | 14 | 36 |
| --          | chr8 | 19779615 | C   | G  | --    | --    | IGR            | SNP | 0.694 | 22 | 50 |
| --          | chr8 | 19779957 | C   | T  | --    | --    | IGR            | SNP | 0.648 | 38 | 70 |
| --          | chr8 | 19781425 | C   | T  | --    | --    | IGR            | SNP | 0.772 | 21 | 71 |
| --          | chr8 | 19782595 | C   | T  | --    | --    | IGR            | SNP | 0.687 | 36 | 79 |
| --          | chr8 | 20397212 | C   | T  | --    | --    | IGR            | SNP | 0.286 | 10 | 4  |
| --          | chr8 | 20977889 | G   | A  | --    | --    | IGR            | SNP | 0.485 | 17 | 16 |

|          |      |          |         |   |    |    |        |     |       |     |    |
|----------|------|----------|---------|---|----|----|--------|-----|-------|-----|----|
| --       | chr8 | 21387232 | G       | A | -- | -- | IGR    | SNP | 0.920 | 2   | 23 |
| --       | chr8 | 21714041 | G       | A | -- | -- | IGR    | SNP | 0.826 | 8   | 38 |
| XPO7     | chr8 | 21817024 | G       | A | -- | -- | Intron | SNP | 0.750 | 7   | 21 |
| BMP1     | chr8 | 22066346 | G       | A | -- | -- | Intron | SNP | 0.464 | 15  | 13 |
| PPP3CC   | chr8 | 22325936 | T       | C | -- | -- | Intron | SNP | 0.516 | 15  | 16 |
| PEBP4    | chr8 | 22612326 | C       | A | -- | -- | Intron | SNP | 0.320 | 17  | 8  |
| PEBP4    | chr8 | 22681522 | A       | C | -- | -- | Intron | SNP | 0.185 | 22  | 5  |
| --       | chr8 | 23325629 | T       | G | -- | -- | IGR    | SNP | 0.875 | 4   | 28 |
| --       | chr8 | 23337830 | G       | C | -- | -- | IGR    | SNP | 0.263 | 28  | 10 |
| SLC25A37 | chr8 | 23415800 | G       | A | -- | -- | Intron | SNP | 0.286 | 20  | 8  |
| --       | chr8 | 23592823 | G       | A | -- | -- | IGR    | SNP | 0.931 | 2   | 27 |
| --       | chr8 | 23597945 | G       | A | -- | -- | IGR    | SNP | 0.818 | 4   | 18 |
| --       | chr8 | 23677282 | T       | C | -- | -- | IGR    | SNP | 0.419 | 18  | 13 |
| --       | chr8 | 24055477 | G       | C | -- | -- | IGR    | SNP | 0.500 | 11  | 11 |
| ADAM28   | chr8 | 24151638 | C       | T | -- | -- | 5'UTR  | SNP | 0.485 | 17  | 16 |
| ADAM28   | chr8 | 24183384 | C       | A | -- | -- | Intron | SNP | 0.235 | 13  | 4  |
| --       | chr8 | 24564183 | G       | C | -- | -- | IGR    | SNP | 0.400 | 12  | 8  |
| --       | chr8 | 24632755 | A       | G | -- | -- | IGR    | SNP | 0.806 | 7   | 29 |
| DOCK5    | chr8 | 25073704 | GTATATA | - | -- | -- | Intron | DEL | 0.105 | 17  | 2  |
| KCTD9    | chr8 | 25296756 | G       | A | -- | -- | Intron | SNP | 0.609 | 9   | 14 |
| --       | chr8 | 25424458 | A       | T | -- | -- | IGR    | SNP | 0.545 | 10  | 12 |
| --       | chr8 | 25453858 | T       | C | -- | -- | IGR    | SNP | 0.625 | 3   | 5  |
| --       | chr8 | 25531102 | A       | G | -- | -- | IGR    | SNP | 0.447 | 21  | 17 |
| --       | chr8 | 25627705 | G       | A | -- | -- | IGR    | SNP | 0.583 | 10  | 14 |
| --       | chr8 | 25627717 | G       | A | -- | -- | IGR    | SNP | 0.565 | 10  | 13 |
| --       | chr8 | 25627739 | G       | C | -- | -- | IGR    | SNP | 0.550 | 9   | 11 |
| --       | chr8 | 25949687 | CAG     | - | -- | -- | IGR    | DEL | 0.303 | 23  | 10 |
| --       | chr8 | 26053628 | C       | T | -- | -- | IGR    | SNP | 0.286 | 10  | 4  |
| BNIP3L   | chr8 | 26257528 | G       | T | -- | -- | Intron | SNP | 0.375 | 5   | 3  |
| BNIP3L   | chr8 | 26259110 | T       | G | -- | -- | Intron | SNP | 0.368 | 12  | 7  |
| DPYSL2   | chr8 | 26470010 | C       | G | -- | -- | Intron | SNP | 0.767 | 7   | 23 |
| DPYSL2   | chr8 | 26476016 | G       | T | -- | -- | Intron | SNP | 0.286 | 10  | 4  |
| --       | chr8 | 26545808 | C       | G | -- | -- | IGR    | SNP | 0.900 | 3   | 27 |
| --       | chr8 | 26587832 | C       | A | -- | -- | IGR    | SNP | 0.118 | 30  | 4  |
| --       | chr8 | 26587833 | A       | C | -- | -- | IGR    | SNP | 0.118 | 30  | 4  |
| PTK2B    | chr8 | 27298216 | G       | T | -- | -- | Intron | SNP | 0.138 | 25  | 4  |
| --       | chr8 | 27343630 | C       | A | -- | -- | IGR    | SNP | 0.484 | 16  | 15 |
| --       | chr8 | 27581056 | C       | T | -- | -- | IGR    | SNP | 0.848 | 5   | 28 |
| C8orf80  | chr8 | 27879590 | A       | T | -- | -- | 3'UTR  | SNP | 0.300 | 7   | 3  |
| PNOC     | chr8 | 28175220 | C       | A | -- | -- | Intron | SNP | 0.538 | 18  | 21 |
| PNOC     | chr8 | 28193436 | GGA     | - | -- | -- | Intron | DEL | 0.115 | 23  | 3  |
| EXTL3    | chr8 | 28565963 | T       | A | -- | -- | Intron | SNP | 0.143 | 48  | 8  |
| INTS9    | chr8 | 28675973 | C       | A | -- | -- | Intron | SNP | 0.300 | 7   | 3  |
| --       | chr8 | 29182738 | G       | C | -- | -- | IGR    | SNP | 0.846 | 6   | 33 |
| --       | chr8 | 29566608 | T       | G | -- | -- | IGR    | SNP | 0.296 | 19  | 8  |
| MIR548O2 | chr8 | 29924469 | T       | G | -- | -- | RNA    | SNP | 0.500 | 14  | 14 |
| --       | chr8 | 30590855 | T       | C | -- | -- | IGR    | SNP | 0.250 | 24  | 8  |
| --       | chr8 | 30779003 | G       | A | -- | -- | IGR    | SNP | 0.125 | 21  | 3  |
| --       | chr8 | 30812379 | A       | T | -- | -- | IGR    | SNP | 0.105 | 34  | 4  |
| --       | chr8 | 31280902 | C       | T | -- | -- | IGR    | SNP | 0.167 | 20  | 4  |
| NRG1     | chr8 | 31941992 | T       | C | -- | -- | Intron | SNP | 0.393 | 17  | 11 |
| NRG1     | chr8 | 32031206 | T       | C | -- | -- | Intron | SNP | 0.292 | 17  | 7  |
| NRG1     | chr8 | 32031238 | C       | G | -- | -- | Intron | SNP | 0.412 | 10  | 7  |
| NRG1     | chr8 | 32052861 | G       | T | -- | -- | Intron | SNP | 0.875 | 3   | 21 |
| NRG1     | chr8 | 32206966 | A       | T | -- | -- | Intron | SNP | 0.250 | 24  | 8  |
| NRG1     | chr8 | 32582522 | T       | A | -- | -- | Intron | SNP | 0.371 | 56  | 33 |
| NRG1     | chr8 | 32599819 | G       | A | -- | -- | Intron | SNP | 0.142 | 115 | 19 |
| --       | chr8 | 32710227 | A       | T | -- | -- | IGR    | SNP | 0.128 | 75  | 11 |
| --       | chr8 | 32756472 | G       | T | -- | -- | IGR    | SNP | 0.714 | 26  | 65 |
| --       | chr8 | 32788916 | A       | C | -- | -- | IGR    | SNP | 0.365 | 61  | 35 |
| --       | chr8 | 32818350 | C       | A | -- | -- | IGR    | SNP | 0.148 | 69  | 12 |
| --       | chr8 | 32860364 | G       | A | -- | -- | IGR    | SNP | 0.317 | 71  | 33 |
| --       | chr8 | 33074957 | A       | T | -- | -- | IGR    | SNP | 0.317 | 41  | 19 |
| --       | chr8 | 33172010 | A       | G | -- | -- | IGR    | SNP | 0.205 | 116 | 30 |
| FUT10    | chr8 | 33323796 | A       | C | -- | -- | Intron | SNP | 0.136 | 70  | 11 |
| RNF122   | chr8 | 33417378 | T       | A | -- | -- | Intron | SNP | 0.148 | 52  | 9  |
| DUSP26   | chr8 | 33454161 | T       | C | -- | -- | Intron | SNP | 0.333 | 58  | 29 |
| --       | chr8 | 33482223 | T       | A | -- | -- | IGR    | SNP | 0.148 | 23  | 4  |
| --       | chr8 | 33535930 | A       | G | -- | -- | IGR    | SNP | 0.250 | 81  | 27 |
| --       | chr8 | 33735641 | G       | A | -- | -- | IGR    | SNP | 0.356 | 56  | 31 |
| --       | chr8 | 33772863 | A       | G | -- | -- | IGR    | SNP | 0.189 | 73  | 17 |
| --       | chr8 | 33845549 | C       | G | -- | -- | IGR    | SNP | 0.744 | 30  | 87 |
| --       | chr8 | 33943973 | T       | C | -- | -- | IGR    | SNP | 0.308 | 63  | 28 |
| --       | chr8 | 34079139 | T       | A | -- | -- | IGR    | SNP | 0.135 | 96  | 15 |
| --       | chr8 | 34322002 | G       | T | -- | -- | IGR    | SNP | 0.230 | 77  | 23 |
| --       | chr8 | 34349187 | G       | A | -- | -- | IGR    | SNP | 0.217 | 94  | 26 |
| --       | chr8 | 34356982 | C       | G | -- | -- | IGR    | SNP | 0.284 | 58  | 23 |
| --       | chr8 | 34394705 | C       | A | -- | -- | IGR    | SNP | 0.351 | 48  | 26 |
| --       | chr8 | 34394706 | A       | T | -- | -- | IGR    | SNP | 0.365 | 47  | 27 |
| --       | chr8 | 34431389 | C       | A | -- | -- | IGR    | SNP | 0.333 | 68  | 34 |

|          |      |          |     |    |       |       |         |     |       |     |    |
|----------|------|----------|-----|----|-------|-------|---------|-----|-------|-----|----|
| --       | chr8 | 34463153 | C   | T  | --    | --    | IGR     | SNP | 0.296 | 76  | 32 |
| --       | chr8 | 34685317 | T   | G  | --    | --    | IGR     | SNP | 0.183 | 85  | 19 |
| --       | chr8 | 34699915 | T   | A  | --    | --    | IGR     | SNP | 0.275 | 79  | 30 |
| --       | chr8 | 34718602 | G   | A  | --    | --    | IGR     | SNP | 0.708 | 33  | 80 |
| --       | chr8 | 34719526 | G   | A  | --    | --    | IGR     | SNP | 0.676 | 34  | 71 |
| --       | chr8 | 34910647 | C   | T  | --    | --    | IGR     | SNP | 0.424 | 19  | 14 |
| --       | chr8 | 35038298 | T   | C  | --    | --    | IGR     | SNP | 0.196 | 82  | 20 |
| --       | chr8 | 35069433 | A   | G  | --    | --    | IGR     | SNP | 0.139 | 62  | 10 |
| UNC5D    | chr8 | 35109560 | G   | T  | --    | --    | Intron  | SNP | 0.129 | 27  | 4  |
| UNC5D    | chr8 | 35118802 | A   | C  | --    | --    | Intron  | SNP | 0.222 | 77  | 22 |
| UNC5D    | chr8 | 35300455 | A   | C  | --    | --    | Intron  | SNP | 0.118 | 60  | 8  |
| UNC5D    | chr8 | 35300456 | C   | A  | --    | --    | Intron  | SNP | 0.101 | 62  | 7  |
| UNC5D    | chr8 | 35329686 | C   | A  | --    | --    | Intron  | SNP | 0.147 | 87  | 15 |
| UNC5D    | chr8 | 35331885 | T   | A  | --    | --    | Intron  | SNP | 0.248 | 88  | 29 |
| UNC5D    | chr8 | 35438020 | G   | T  | --    | --    | Intron  | SNP | 0.417 | 60  | 43 |
| UNC5D    | chr8 | 35477348 | C   | T  | --    | --    | Intron  | SNP | 0.234 | 82  | 25 |
| UNC5D    | chr8 | 35582889 | G   | T  | --    | --    | Intron  | SNP | 0.341 | 56  | 29 |
| UNC5D    | chr8 | 35622886 | -   | GA | --    | --    | Intron  | INS | 0.296 | 76  | 32 |
| --       | chr8 | 35770876 | C   | A  | --    | --    | IGR     | SNP | 0.154 | 77  | 14 |
| --       | chr8 | 35970307 | A   | T  | --    | --    | IGR     | SNP | 0.185 | 66  | 15 |
| --       | chr8 | 36046236 | G   | T  | --    | --    | IGR     | SNP | 0.360 | 71  | 40 |
| --       | chr8 | 36062151 | C   | T  | --    | --    | IGR     | SNP | 0.724 | 27  | 71 |
| --       | chr8 | 36068750 | G   | A  | --    | --    | IGR     | SNP | 0.197 | 98  | 24 |
| --       | chr8 | 36204394 | -   | CA | --    | --    | IGR     | INS | 0.171 | 58  | 12 |
| --       | chr8 | 36237476 | A   | T  | --    | --    | IGR     | SNP | 0.175 | 47  | 10 |
| --       | chr8 | 36240502 | C   | A  | --    | --    | IGR     | SNP | 0.167 | 20  | 4  |
| --       | chr8 | 36246198 | C   | T  | --    | --    | IGR     | SNP | 0.412 | 20  | 14 |
| --       | chr8 | 36301288 | T   | C  | --    | --    | IGR     | SNP | 0.139 | 93  | 15 |
| --       | chr8 | 36566853 | G   | A  | --    | --    | IGR     | SNP | 0.700 | 27  | 63 |
| --       | chr8 | 36867589 | A   | T  | --    | --    | IGR     | SNP | 0.157 | 91  | 17 |
| --       | chr8 | 36969347 | C   | T  | --    | --    | IGR     | SNP | 0.367 | 76  | 44 |
| --       | chr8 | 36984498 | T   | C  | --    | --    | IGR     | SNP | 0.111 | 104 | 13 |
| --       | chr8 | 37302868 | A   | C  | --    | --    | IGR     | SNP | 0.154 | 55  | 10 |
| --       | chr8 | 37533664 | T   | A  | --    | --    | IGR     | SNP | 0.300 | 21  | 9  |
| GPR124   | chr8 | 37686185 | A   | T  | --    | --    | Intron  | SNP | 0.100 | 36  | 4  |
| ASH2L    | chr8 | 37962743 | C   | G  | --    | --    | 5'Flank | SNP | 0.730 | 30  | 81 |
| WHSC1L1  | chr8 | 38158479 | G   | T  | --    | --    | Intron  | SNP | 0.102 | 97  | 11 |
| ADAM32   | chr8 | 39022623 | A   | T  | A741T | T247T | Silent  | SNP | 0.129 | 88  | 13 |
| ADAM18   | chr8 | 39563950 | A   | G  | --    | --    | Intron  | SNP | 0.222 | 70  | 20 |
| ADAM2    | chr8 | 39684250 | A   | C  | --    | --    | Intron  | SNP | 0.118 | 90  | 12 |
| IDO1     | chr8 | 39776703 | T   | A  | --    | --    | Intron  | SNP | 0.272 | 67  | 25 |
| IDO2     | chr8 | 39810906 | T   | C  | --    | --    | Intron  | SNP | 0.165 | 76  | 15 |
| --       | chr8 | 39965591 | C   | G  | --    | --    | IGR     | SNP | 0.718 | 31  | 79 |
| --       | chr8 | 40058772 | G   | T  | --    | --    | IGR     | SNP | 0.706 | 37  | 89 |
| --       | chr8 | 40306382 | G   | C  | --    | --    | IGR     | SNP | 0.266 | 69  | 25 |
| --       | chr8 | 40314775 | C   | T  | --    | --    | IGR     | SNP | 0.731 | 29  | 79 |
| ZMAT4    | chr8 | 40507349 | G   | A  | --    | --    | Intron  | SNP | 0.120 | 22  | 3  |
| ZMAT4    | chr8 | 40507357 | T   | C  | --    | --    | Intron  | SNP | 0.111 | 24  | 3  |
| ZMAT4    | chr8 | 40605278 | A   | G  | --    | --    | Intron  | SNP | 0.254 | 85  | 29 |
| --       | chr8 | 40769724 | C   | A  | --    | --    | IGR     | SNP | 0.269 | 57  | 21 |
| --       | chr8 | 40998146 | AC  | -  | --    | --    | IGR     | DEL | 0.145 | 94  | 16 |
| --       | chr8 | 41181537 | C   | T  | --    | --    | IGR     | SNP | 0.135 | 109 | 17 |
| --       | chr8 | 41383922 | T   | G  | --    | --    | IGR     | SNP | 0.107 | 117 | 14 |
| AGPAT6   | chr8 | 41447180 | G   | T  | --    | --    | Intron  | SNP | 0.271 | 97  | 36 |
| AGPAT6   | chr8 | 41474982 | G   | A  | --    | --    | Intron  | SNP | 0.654 | 28  | 53 |
| KAT6A    | chr8 | 41787929 | G   | T  | --    | --    | 3'UTR   | SNP | 0.172 | 53  | 11 |
| --       | chr8 | 43075121 | G   | A  | --    | --    | IGR     | SNP | 0.166 | 121 | 24 |
| --       | chr8 | 43384059 | CG  | -  | --    | --    | IGR     | DEL | 0.139 | 99  | 16 |
| --       | chr8 | 43403702 | C   | T  | --    | --    | IGR     | SNP | 0.241 | 110 | 35 |
| --       | chr8 | 43511182 | A   | T  | --    | --    | IGR     | SNP | 0.119 | 148 | 20 |
| --       | chr8 | 43828459 | T   | A  | --    | --    | IGR     | SNP | 0.462 | 7   | 6  |
| --       | chr8 | 43828616 | A   | G  | --    | --    | IGR     | SNP | 0.136 | 51  | 8  |
| --       | chr8 | 43832869 | T   | G  | --    | --    | IGR     | SNP | 0.102 | 53  | 6  |
| --       | chr8 | 46849452 | T   | G  | --    | --    | IGR     | SNP | 0.108 | 58  | 7  |
| --       | chr8 | 46863930 | G   | A  | --    | --    | IGR     | SNP | 0.136 | 38  | 6  |
| --       | chr8 | 47036831 | G   | C  | --    | --    | IGR     | SNP | 0.372 | 54  | 32 |
| --       | chr8 | 47281947 | T   | C  | --    | --    | IGR     | SNP | 0.189 | 43  | 10 |
| --       | chr8 | 47513612 | T   | A  | --    | --    | IGR     | SNP | 0.103 | 35  | 4  |
| --       | chr8 | 47636404 | G   | A  | --    | --    | IGR     | SNP | 0.304 | 32  | 14 |
| --       | chr8 | 47646061 | T   | C  | --    | --    | IGR     | SNP | 0.308 | 9   | 4  |
| --       | chr8 | 47713662 | G   | A  | --    | --    | IGR     | SNP | 0.125 | 21  | 3  |
| --       | chr8 | 47860378 | A   | G  | --    | --    | IGR     | SNP | 0.173 | 43  | 9  |
| --       | chr8 | 47875067 | T   | A  | --    | --    | IGR     | SNP | 0.246 | 46  | 15 |
| --       | chr8 | 48002206 | AAT | -  | --    | --    | IGR     | DEL | 0.111 | 24  | 3  |
| --       | chr8 | 48053811 | G   | T  | --    | --    | IGR     | SNP | 0.109 | 98  | 12 |
| --       | chr8 | 48065395 | G   | A  | --    | --    | IGR     | SNP | 0.173 | 67  | 14 |
| --       | chr8 | 48088492 | T   | C  | --    | --    | IGR     | SNP | 0.190 | 17  | 4  |
| KIAA0146 | chr8 | 48214980 | C   | G  | --    | --    | Intron  | SNP | 0.157 | 43  | 8  |
| KIAA0146 | chr8 | 48263227 | T   | A  | --    | --    | Intron  | SNP | 0.149 | 74  | 13 |
| KIAA0146 | chr8 | 48629539 | G   | C  | --    | --    | Intron  | SNP | 0.337 | 65  | 33 |

|             |      |          |      |     |       |       |                 |     |       |    |    |
|-------------|------|----------|------|-----|-------|-------|-----------------|-----|-------|----|----|
| --          | chr8 | 49365231 | C    | A   | --    | --    | IGR             | SNP | 0.113 | 47 | 6  |
| --          | chr8 | 49870758 | C    | T   | --    | --    | IGR             | SNP | 0.125 | 21 | 3  |
| --          | chr8 | 50069290 | A    | G   | --    | --    | IGR             | SNP | 0.415 | 38 | 27 |
| --          | chr8 | 50176783 | C    | T   | --    | --    | IGR             | SNP | 0.627 | 19 | 32 |
| --          | chr8 | 50634890 | A    | T   | --    | --    | IGR             | SNP | 0.231 | 30 | 9  |
| --          | chr8 | 50740744 | T    | A   | --    | --    | IGR             | SNP | 0.241 | 44 | 14 |
| --          | chr8 | 50765656 | -    | CAG | --    | --    | IGR             | INS | 0.253 | 62 | 21 |
| --          | chr8 | 50786245 | C    | T   | --    | --    | IGR             | SNP | 0.507 | 36 | 37 |
| SNTG1       | chr8 | 51218372 | T    | C   | --    | --    | Intron          | SNP | 0.383 | 29 | 18 |
| SNTG1       | chr8 | 51316057 | T    | A   | --    | --    | Intron          | SNP | 0.563 | 28 | 36 |
| SNTG1       | chr8 | 51357628 | C    | G   | --    | --    | Intron          | SNP | 0.522 | 33 | 36 |
| SNTG1       | chr8 | 51398703 | C    | G   | --    | --    | Intron          | SNP | 0.250 | 12 | 4  |
| SNTG1       | chr8 | 51398709 | C    | T   | --    | --    | Intron          | SNP | 0.267 | 11 | 4  |
| SNTG1       | chr8 | 51635016 | G    | A   | --    | --    | Intron          | SNP | 0.589 | 23 | 33 |
| --          | chr8 | 52124396 | T    | A   | --    | --    | IGR             | SNP | 0.143 | 60 | 10 |
| --          | chr8 | 52191443 | A    | C   | --    | --    | IGR             | SNP | 0.190 | 47 | 11 |
| --          | chr8 | 52192425 | G    | C   | --    | --    | IGR             | SNP | 0.143 | 42 | 7  |
| --          | chr8 | 52219012 | T    | A   | --    | --    | IGR             | SNP | 0.217 | 65 | 18 |
| --          | chr8 | 52222181 | C    | T   | --    | --    | IGR             | SNP | 0.128 | 41 | 6  |
| PXDNL       | chr8 | 52524433 | G    | C   | --    | --    | Intron          | SNP | 0.459 | 46 | 39 |
| --          | chr8 | 52953319 | G    | C   | --    | --    | IGR             | SNP | 0.467 | 57 | 50 |
| --          | chr8 | 53354536 | A    | G   | --    | --    | IGR             | SNP | 0.214 | 11 | 3  |
| --          | chr8 | 53354577 | C    | T   | --    | --    | IGR             | SNP | 0.308 | 9  | 4  |
| --          | chr8 | 53509894 | C    | A   | --    | --    | IGR             | SNP | 0.175 | 66 | 14 |
| RB1CC1      | chr8 | 53593570 | G    | T   | --    | --    | Intron          | SNP | 0.125 | 35 | 5  |
| --          | chr8 | 53655085 | C    | A   | --    | --    | IGR             | SNP | 0.174 | 19 | 4  |
| --          | chr8 | 53750476 | G    | A   | --    | --    | IGR             | SNP | 0.143 | 66 | 11 |
| --          | chr8 | 53797428 | G    | A   | --    | --    | IGR             | SNP | 0.107 | 25 | 3  |
| --          | chr8 | 54073821 | A    | C   | --    | --    | IGR             | SNP | 0.103 | 35 | 4  |
| --          | chr8 | 54220351 | T    | A   | --    | --    | IGR             | SNP | 0.478 | 12 | 11 |
| --          | chr8 | 54346009 | G    | C   | --    | --    | IGR             | SNP | 0.360 | 32 | 18 |
| --          | chr8 | 54522694 | A    | G   | --    | --    | IGR             | SNP | 0.200 | 12 | 3  |
| RGS20       | chr8 | 54860988 | TAA  | -   | --    | --    | Intron          | DEL | 0.167 | 15 | 3  |
| --          | chr8 | 55223960 | A    | C   | --    | --    | IGR             | SNP | 0.111 | 48 | 6  |
| --          | chr8 | 55245251 | G    | T   | --    | --    | IGR             | SNP | 0.226 | 24 | 7  |
| --          | chr8 | 55442798 | G    | A   | --    | --    | IGR             | SNP | 0.189 | 60 | 14 |
| --          | chr8 | 55556311 | T    | G   | --    | --    | IGR             | SNP | 0.182 | 45 | 10 |
| --          | chr8 | 55594587 | A    | T   | --    | --    | IGR             | SNP | 0.105 | 51 | 6  |
| --          | chr8 | 55621654 | C    | T   | --    | --    | IGR             | SNP | 0.192 | 63 | 15 |
| --          | chr8 | 55629779 | -    | CT  | --    | --    | IGR             | INS | 0.203 | 47 | 12 |
| --          | chr8 | 55703037 | C    | G   | --    | --    | IGR             | SNP | 0.537 | 25 | 29 |
| --          | chr8 | 55777358 | C    | T   | --    | --    | IGR             | SNP | 0.159 | 37 | 7  |
| --          | chr8 | 55800676 | G    | A   | --    | --    | IGR             | SNP | 0.612 | 19 | 30 |
| --          | chr8 | 55912709 | G    | A   | --    | --    | IGR             | SNP | 0.237 | 45 | 14 |
| XKR4        | chr8 | 56185572 | A    | G   | --    | --    | Intron          | SNP | 0.520 | 36 | 39 |
| XKR4        | chr8 | 56253739 | G    | A   | --    | --    | Intron          | SNP | 0.247 | 67 | 22 |
| XKR4        | chr8 | 56388658 | G    | A   | --    | --    | Intron          | SNP | 0.125 | 70 | 10 |
| --          | chr8 | 56472677 | GCA  | -   | --    | --    | IGR             | DEL | 0.473 | 48 | 43 |
| --          | chr8 | 56544440 | G    | A   | --    | --    | IGR             | SNP | 0.159 | 58 | 11 |
| --          | chr8 | 56741836 | G    | T   | --    | --    | IGR             | SNP | 0.267 | 11 | 4  |
| LYN         | chr8 | 56910630 | G    | C   | --    | --    | Intron          | SNP | 0.293 | 29 | 12 |
| --          | chr8 | 57014953 | T    | A   | --    | --    | IGR             | SNP | 0.538 | 36 | 42 |
| SDR16C5     | chr8 | 57220502 | A    | T   | --    | --    | Intron          | SNP | 0.650 | 21 | 39 |
| --          | chr8 | 57328652 | CCAT | -   | --    | --    | IGR             | DEL | 0.286 | 10 | 4  |
| --          | chr8 | 57348021 | C    | A   | --    | --    | IGR             | SNP | 0.418 | 39 | 28 |
| --          | chr8 | 57398486 | G    | T   | --    | --    | IGR             | SNP | 0.538 | 43 | 50 |
| LOC10050765 | chr8 | 57471888 | G    | A   | --    | --    | RNA             | SNP | 0.100 | 63 | 7  |
| --          | chr8 | 57626049 | C    | A   | --    | --    | IGR             | SNP | 0.540 | 29 | 34 |
| --          | chr8 | 57697144 | A    | T   | --    | --    | IGR             | SNP | 0.258 | 23 | 8  |
| --          | chr8 | 57712323 | T    | C   | --    | --    | IGR             | SNP | 0.230 | 57 | 17 |
| --          | chr8 | 57791718 | T    | C   | --    | --    | IGR             | SNP | 0.377 | 48 | 29 |
| --          | chr8 | 57814250 | C    | A   | --    | --    | IGR             | SNP | 0.253 | 56 | 19 |
| --          | chr8 | 57828048 | C    | T   | --    | --    | IGR             | SNP | 0.293 | 29 | 12 |
| LOC10050765 | chr8 | 58139698 | T    | C   | --    | --    | RNA             | SNP | 0.500 | 29 | 29 |
| --          | chr8 | 58541317 | T    | C   | --    | --    | IGR             | SNP | 0.569 | 25 | 33 |
| --          | chr8 | 58625191 | C    | A   | --    | --    | IGR             | SNP | 0.158 | 32 | 6  |
| --          | chr8 | 58684417 | G    | A   | --    | --    | IGR             | SNP | 0.412 | 30 | 21 |
| --          | chr8 | 58756220 | A    | T   | --    | --    | IGR             | SNP | 0.185 | 53 | 12 |
| FAM110B     | chr8 | 58929277 | C    | G   | --    | --    | Intron          | SNP | 0.342 | 52 | 27 |
| FAM110B     | chr8 | 58968562 | T    | C   | --    | --    | Intron          | SNP | 0.557 | 35 | 44 |
| --          | chr8 | 59142075 | G    | C   | --    | --    | IGR             | SNP | 0.500 | 21 | 21 |
| --          | chr8 | 59152746 | A    | C   | --    | --    | IGR             | SNP | 0.132 | 46 | 7  |
| --          | chr8 | 59171937 | T    | C   | --    | --    | IGR             | SNP | 0.309 | 67 | 30 |
| --          | chr8 | 59193839 | A    | G   | --    | --    | IGR             | SNP | 0.121 | 51 | 7  |
| NSMAF       | chr8 | 59541041 | A    | T   | --    | --    | Intron          | SNP | 0.189 | 43 | 10 |
| TOX         | chr8 | 59731236 | A    | G   | --    | --    | Intron          | SNP | 0.629 | 39 | 66 |
| TOX         | chr8 | 59764083 | C    | A   | G693T | K231N | Missense_mutati | SNP | 0.186 | 70 | 16 |
| TOX         | chr8 | 59778853 | C    | T   | --    | --    | Intron          | SNP | 0.590 | 32 | 46 |
| TOX         | chr8 | 59784797 | C    | A   | --    | --    | Intron          | SNP | 0.522 | 32 | 35 |
| --          | chr8 | 60083763 | A    | G   | --    | --    | IGR             | SNP | 0.250 | 21 | 7  |

|             |      |          |            |       |    |    |         |     |       |    |    |
|-------------|------|----------|------------|-------|----|----|---------|-----|-------|----|----|
| --          | chr8 | 60127157 | G          | A     | -- | -- | IGR     | SNP | 0.114 | 39 | 5  |
| --          | chr8 | 60270647 | C          | T     | -- | -- | IGR     | SNP | 0.210 | 49 | 13 |
| --          | chr8 | 60399553 | T          | A     | -- | -- | IGR     | SNP | 0.148 | 23 | 4  |
| --          | chr8 | 60440252 | G          | T     | -- | -- | IGR     | SNP | 0.431 | 33 | 25 |
| --          | chr8 | 60669027 | C          | A     | -- | -- | IGR     | SNP | 0.233 | 33 | 10 |
| --          | chr8 | 60790490 | A          | C     | -- | -- | IGR     | SNP | 0.208 | 38 | 10 |
| --          | chr8 | 61039269 | A          | C     | -- | -- | IGR     | SNP | 0.297 | 26 | 11 |
| --          | chr8 | 61061401 | T          | A     | -- | -- | IGR     | SNP | 0.182 | 45 | 10 |
| CA8         | chr8 | 61104707 | C          | A     | -- | -- | Intron  | SNP | 0.121 | 51 | 7  |
| --          | chr8 | 61231980 | A          | G     | -- | -- | IGR     | SNP | 0.241 | 22 | 7  |
| --          | chr8 | 61259763 | A          | T     | -- | -- | IGR     | SNP | 0.405 | 25 | 17 |
| RAB2A       | chr8 | 61469438 | T          | C     | -- | -- | Intron  | SNP | 0.158 | 32 | 6  |
| RAB2A       | chr8 | 61490377 | A          | T     | -- | -- | Intron  | SNP | 0.294 | 12 | 5  |
| CHD7        | chr8 | 61663492 | A          | T     | -- | -- | Intron  | SNP | 0.110 | 65 | 8  |
| --          | chr8 | 62021850 | C          | T     | -- | -- | IGR     | SNP | 0.730 | 10 | 27 |
| --          | chr8 | 62091488 | C          | A     | -- | -- | IGR     | SNP | 0.154 | 55 | 10 |
| --          | chr8 | 62181852 | GT         | -     | -- | -- | IGR     | DEL | 0.235 | 13 | 4  |
| CLVS1       | chr8 | 62228565 | G          | T     | -- | -- | Intron  | SNP | 0.132 | 46 | 7  |
| CLVS1       | chr8 | 62306515 | C          | A     | -- | -- | Intron  | SNP | 0.167 | 65 | 13 |
| NKAIN3      | chr8 | 63335985 | TTA        | -     | -- | -- | Intron  | DEL | 0.118 | 15 | 2  |
| NKAIN3      | chr8 | 63390140 | G          | A     | -- | -- | Intron  | SNP | 0.278 | 52 | 20 |
| NKAIN3      | chr8 | 63401106 | A          | C     | -- | -- | Intron  | SNP | 0.152 | 56 | 10 |
| NKAIN3      | chr8 | 63483159 | G          | T     | -- | -- | Intron  | SNP | 0.117 | 53 | 7  |
| NKAIN3      | chr8 | 63760956 | C          | G     | -- | -- | Intron  | SNP | 0.110 | 65 | 8  |
| NKAIN3      | chr8 | 63899322 | C          | G     | -- | -- | Intron  | SNP | 0.620 | 19 | 31 |
| --          | chr8 | 64155901 | G          | T     | -- | -- | IGR     | SNP | 0.160 | 21 | 4  |
| --          | chr8 | 64275812 | T          | G     | -- | -- | IGR     | SNP | 0.571 | 27 | 36 |
| --          | chr8 | 64364054 | C          | T     | -- | -- | IGR     | SNP | 0.109 | 49 | 6  |
| --          | chr8 | 64506266 | C          | A     | -- | -- | IGR     | SNP | 0.481 | 41 | 38 |
| --          | chr8 | 64561508 | G          | T     | -- | -- | IGR     | SNP | 0.241 | 44 | 14 |
| --          | chr8 | 64593080 | G          | T     | -- | -- | IGR     | SNP | 0.207 | 46 | 12 |
| --          | chr8 | 64904230 | G          | T     | -- | -- | IGR     | SNP | 0.308 | 45 | 20 |
| --          | chr8 | 65107926 | T          | C     | -- | -- | IGR     | SNP | 0.112 | 79 | 10 |
| --          | chr8 | 65252919 | T          | C     | -- | -- | IGR     | SNP | 0.308 | 36 | 16 |
| --          | chr8 | 65253552 | C          | G     | -- | -- | IGR     | SNP | 0.200 | 44 | 11 |
| LOC10013015 | chr8 | 65285062 | G          | T     | -- | -- | 5'Flank | SNP | 0.442 | 24 | 19 |
| --          | chr8 | 65433748 | G          | T     | -- | -- | IGR     | SNP | 0.149 | 57 | 10 |
| CYP7B1      | chr8 | 65651147 | C          | A     | -- | -- | Intron  | SNP | 0.114 | 62 | 8  |
| CYP7B1      | chr8 | 65689290 | G          | T     | -- | -- | Intron  | SNP | 0.190 | 51 | 12 |
| --          | chr8 | 65895370 | C          | G     | -- | -- | IGR     | SNP | 0.619 | 24 | 39 |
| --          | chr8 | 66152389 | A          | C     | -- | -- | IGR     | SNP | 0.114 | 62 | 8  |
| --          | chr8 | 66167804 | C          | T     | -- | -- | IGR     | SNP | 0.184 | 31 | 7  |
| --          | chr8 | 66352924 | C          | G     | -- | -- | IGR     | SNP | 0.393 | 34 | 22 |
| MTFR1       | chr8 | 66565140 | A          | C     | -- | -- | Intron  | SNP | 0.636 | 32 | 56 |
| --          | chr8 | 66793388 | A          | T     | -- | -- | IGR     | SNP | 0.206 | 27 | 7  |
| --          | chr8 | 66794707 | A          | T     | -- | -- | IGR     | SNP | 0.361 | 46 | 26 |
| --          | chr8 | 67463055 | T          | C     | -- | -- | IGR     | SNP | 0.338 | 43 | 22 |
| MYBL1       | chr8 | 67481093 | C          | G     | -- | -- | Intron  | SNP | 0.478 | 24 | 22 |
| VCPIP1      | chr8 | 67541889 | GCCTGGGCA- | -     | -- | -- | 3'Flank | DEL | 0.554 | 33 | 41 |
| VCPIP1      | chr8 | 67551553 | A          | T     | -- | -- | Intron  | SNP | 0.114 | 31 | 4  |
| ARFGEF1     | chr8 | 68255949 | A          | C     | -- | -- | 5'Flank | SNP | 0.333 | 10 | 5  |
| CPA6        | chr8 | 68504840 | T          | G     | -- | -- | Intron  | SNP | 0.188 | 13 | 3  |
| CPA6        | chr8 | 68526966 | C          | G     | -- | -- | Intron  | SNP | 0.167 | 60 | 12 |
| --          | chr8 | 69183586 | T          | C     | -- | -- | IGR     | SNP | 0.255 | 35 | 12 |
| C8orf34     | chr8 | 69281999 | C          | T     | -- | -- | Intron  | SNP | 0.479 | 37 | 34 |
| C8orf34     | chr8 | 69438107 | C          | G     | -- | -- | Intron  | SNP | 0.704 | 21 | 50 |
| C8orf34     | chr8 | 69441763 | C          | T     | -- | -- | Intron  | SNP | 0.473 | 29 | 26 |
| C8orf34     | chr8 | 69443205 | C          | G     | -- | -- | Intron  | SNP | 0.211 | 45 | 12 |
| C8orf34     | chr8 | 69642211 | A          | C     | -- | -- | Intron  | SNP | 0.420 | 29 | 21 |
| C8orf34     | chr8 | 69698079 | C          | A     | -- | -- | Intron  | SNP | 0.706 | 15 | 36 |
| --          | chr8 | 69771609 | G          | A     | -- | -- | IGR     | SNP | 0.623 | 20 | 33 |
| LOC10050571 | chr8 | 70014216 | T          | C     | -- | -- | RNA     | SNP | 0.153 | 72 | 13 |
| --          | chr8 | 70167652 | G          | A     | -- | -- | IGR     | SNP | 0.333 | 12 | 6  |
| --          | chr8 | 70167658 | T          | A     | -- | -- | IGR     | SNP | 0.333 | 12 | 6  |
| --          | chr8 | 70167661 | A          | G     | -- | -- | IGR     | SNP | 0.389 | 11 | 7  |
| --          | chr8 | 70167856 | G          | A     | -- | -- | IGR     | SNP | 0.250 | 18 | 6  |
| --          | chr8 | 70167860 | T          | C     | -- | -- | IGR     | SNP | 0.261 | 17 | 6  |
| --          | chr8 | 70368642 | T          | C     | -- | -- | IGR     | SNP | 0.532 | 29 | 33 |
| SULF1       | chr8 | 70408577 | G          | T     | -- | -- | Intron  | SNP | 0.233 | 46 | 14 |
| SULF1       | chr8 | 70467170 | C          | T     | -- | -- | Intron  | SNP | 0.176 | 28 | 6  |
| SLCO5A1     | chr8 | 70711702 | A          | C     | -- | -- | Intron  | SNP | 0.200 | 48 | 12 |
| --          | chr8 | 70780179 | C          | T     | -- | -- | IGR     | SNP | 0.152 | 56 | 10 |
| --          | chr8 | 70790563 | GTA        | -     | -- | -- | IGR     | DEL | 0.118 | 30 | 4  |
| --          | chr8 | 70828785 | C          | T     | -- | -- | IGR     | SNP | 0.437 | 40 | 31 |
| NCOA2       | chr8 | 71262010 | G          | A     | -- | -- | Intron  | SNP | 0.393 | 37 | 24 |
| --          | chr8 | 71393242 | G          | T     | -- | -- | IGR     | SNP | 0.160 | 68 | 13 |
| --          | chr8 | 71480752 | A          | C     | -- | -- | IGR     | SNP | 0.165 | 66 | 13 |
| --          | chr8 | 71873048 | A          | T     | -- | -- | IGR     | SNP | 0.100 | 54 | 6  |
| --          | chr8 | 72012665 | A          | G     | -- | -- | IGR     | SNP | 0.169 | 59 | 12 |
| --          | chr8 | 72571938 | -          | CTAAA | -- | -- | IGR     | INS | 0.273 | 16 | 6  |

|             |      |          |        |      |    |    |         |     |       |    |    |
|-------------|------|----------|--------|------|----|----|---------|-----|-------|----|----|
| --          | chr8 | 72675565 | A      | T    | -- | -- | IGR     | SNP | 0.175 | 66 | 14 |
| --          | chr8 | 72690837 | T      | A    | -- | -- | IGR     | SNP | 0.173 | 62 | 13 |
| --          | chr8 | 73071918 | A      | G    | -- | -- | IGR     | SNP | 0.386 | 35 | 22 |
| --          | chr8 | 73332073 | A      | G    | -- | -- | IGR     | SNP | 0.653 | 26 | 49 |
| KCNB2       | chr8 | 73666554 | C      | G    | -- | -- | Intron  | SNP | 0.263 | 56 | 20 |
| KCNB2       | chr8 | 73764084 | C      | A    | -- | -- | Intron  | SNP | 0.176 | 14 | 3  |
| --          | chr8 | 73874686 | T      | G    | -- | -- | IGR     | SNP | 0.240 | 19 | 6  |
| --          | chr8 | 74260950 | G      | T    | -- | -- | IGR     | SNP | 0.209 | 53 | 14 |
| LOC10012812 | chr8 | 74353403 | C      | T    | -- | -- | RNA     | SNP | 0.500 | 34 | 34 |
| STAU2       | chr8 | 74584897 | C      | G    | -- | -- | Intron  | SNP | 0.569 | 31 | 41 |
| UBE2W       | chr8 | 74768617 | G      | T    | -- | -- | Intron  | SNP | 0.125 | 28 | 4  |
| --          | chr8 | 74966796 | T      | C    | -- | -- | IGR     | SNP | 0.167 | 15 | 3  |
| JPH1        | chr8 | 75203399 | -      | CA   | -- | -- | Intron  | INS | 0.240 | 19 | 6  |
| --          | chr8 | 75329006 | C      | G    | -- | -- | IGR     | SNP | 0.425 | 42 | 31 |
| --          | chr8 | 75358053 | T      | A    | -- | -- | IGR     | SNP | 0.152 | 56 | 10 |
| --          | chr8 | 75466027 | A      | T    | -- | -- | IGR     | SNP | 0.574 | 20 | 27 |
| --          | chr8 | 75491516 | G      | T    | -- | -- | IGR     | SNP | 0.196 | 74 | 18 |
| FLJ39080    | chr8 | 75515292 | T      | A    | -- | -- | RNA     | SNP | 0.167 | 20 | 4  |
| FLJ39080    | chr8 | 75627354 | C      | G    | -- | -- | RNA     | SNP | 0.600 | 20 | 30 |
| FLJ39080    | chr8 | 75628772 | C      | T    | -- | -- | RNA     | SNP | 0.583 | 25 | 35 |
| --          | chr8 | 75701987 | C      | T    | -- | -- | IGR     | SNP | 0.678 | 19 | 40 |
| --          | chr8 | 75769252 | -      | GCAA | -- | -- | IGR     | INS | 0.138 | 55 | 9  |
| --          | chr8 | 75805978 | A      | T    | -- | -- | IGR     | SNP | 0.118 | 60 | 8  |
| --          | chr8 | 75832337 | G      | T    | -- | -- | IGR     | SNP | 0.129 | 61 | 9  |
| CRISPLD1    | chr8 | 75923622 | T      | A    | -- | -- | Intron  | SNP | 0.532 | 22 | 25 |
| --          | chr8 | 76300960 | A      | C    | -- | -- | IGR     | SNP | 0.362 | 44 | 25 |
| HNF4G       | chr8 | 76469839 | G      | C    | -- | -- | Intron  | SNP | 0.471 | 37 | 33 |
| --          | chr8 | 76772759 | TC     | -    | -- | -- | IGR     | DEL | 0.442 | 24 | 19 |
| --          | chr8 | 76775219 | C      | G    | -- | -- | IGR     | SNP | 0.534 | 27 | 31 |
| --          | chr8 | 76775241 | C      | T    | -- | -- | IGR     | SNP | 0.571 | 24 | 32 |
| --          | chr8 | 76807118 | G      | T    | -- | -- | IGR     | SNP | 0.500 | 27 | 27 |
| --          | chr8 | 76987518 | T      | A    | -- | -- | IGR     | SNP | 0.238 | 48 | 15 |
| --          | chr8 | 76992606 | A      | G    | -- | -- | IGR     | SNP | 0.111 | 56 | 7  |
| --          | chr8 | 77070923 | G      | A    | -- | -- | IGR     | SNP | 0.400 | 45 | 30 |
| --          | chr8 | 77102132 | A      | T    | -- | -- | IGR     | SNP | 0.351 | 37 | 20 |
| --          | chr8 | 77102133 | A      | T    | -- | -- | IGR     | SNP | 0.364 | 35 | 20 |
| --          | chr8 | 77306857 | A      | T    | -- | -- | IGR     | SNP | 0.130 | 47 | 7  |
| --          | chr8 | 77475877 | T      | C    | -- | -- | IGR     | SNP | 0.536 | 26 | 30 |
| LOC10019237 | chr8 | 77522310 | G      | A    | -- | -- | 3'Flank | SNP | 0.113 | 47 | 6  |
| ZFHX4       | chr8 | 77650860 | CTTCT  | -    | -- | -- | Intron  | DEL | 0.119 | 37 | 5  |
| ZFHX4       | chr8 | 77711347 | A      | T    | -- | -- | Intron  | SNP | 0.548 | 38 | 46 |
| ZFHX4       | chr8 | 77718408 | A      | G    | -- | -- | Intron  | SNP | 0.564 | 41 | 53 |
| --          | chr8 | 78000853 | G      | A    | -- | -- | IGR     | SNP | 0.733 | 8  | 22 |
| --          | chr8 | 78147125 | TTA    | -    | -- | -- | IGR     | DEL | 0.349 | 28 | 15 |
| --          | chr8 | 78184156 | A      | T    | -- | -- | IGR     | SNP | 0.167 | 55 | 11 |
| --          | chr8 | 78273772 | C      | G    | -- | -- | IGR     | SNP | 0.149 | 57 | 10 |
| --          | chr8 | 78320568 | T      | C    | -- | -- | IGR     | SNP | 0.238 | 64 | 20 |
| --          | chr8 | 78634160 | G      | C    | -- | -- | IGR     | SNP | 0.119 | 59 | 8  |
| --          | chr8 | 78839392 | C      | T    | -- | -- | IGR     | SNP | 0.444 | 50 | 40 |
| --          | chr8 | 78855598 | G      | C    | -- | -- | IGR     | SNP | 0.462 | 7  | 6  |
| --          | chr8 | 79027689 | C      | A    | -- | -- | IGR     | SNP | 0.553 | 38 | 47 |
| --          | chr8 | 79029261 | G      | C    | -- | -- | IGR     | SNP | 0.565 | 30 | 39 |
| --          | chr8 | 79271424 | A      | G    | -- | -- | IGR     | SNP | 0.148 | 52 | 9  |
| --          | chr8 | 79274897 | T      | G    | -- | -- | IGR     | SNP | 0.175 | 33 | 7  |
| --          | chr8 | 79317935 | G      | C    | -- | -- | IGR     | SNP | 0.161 | 94 | 18 |
| --          | chr8 | 79352569 | A      | T    | -- | -- | IGR     | SNP | 0.406 | 19 | 13 |
| --          | chr8 | 79787493 | C      | A    | -- | -- | IGR     | SNP | 0.102 | 44 | 5  |
| --          | chr8 | 80031749 | G      | A    | -- | -- | IGR     | SNP | 0.230 | 67 | 20 |
| --          | chr8 | 80151191 | G      | A    | -- | -- | IGR     | SNP | 0.418 | 53 | 38 |
| --          | chr8 | 80151650 | C      | T    | -- | -- | IGR     | SNP | 0.471 | 27 | 24 |
| --          | chr8 | 80207423 | G      | C    | -- | -- | IGR     | SNP | 0.154 | 33 | 6  |
| --          | chr8 | 80356163 | C      | A    | -- | -- | IGR     | SNP | 0.329 | 53 | 26 |
| --          | chr8 | 80364154 | G      | A    | -- | -- | IGR     | SNP | 0.422 | 52 | 38 |
| --          | chr8 | 80365282 | G      | T    | -- | -- | IGR     | SNP | 0.398 | 50 | 33 |
| --          | chr8 | 80410771 | C      | T    | -- | -- | IGR     | SNP | 0.138 | 25 | 4  |
| --          | chr8 | 80436764 | T      | G    | -- | -- | IGR     | SNP | 0.254 | 47 | 16 |
| --          | chr8 | 80736068 | T      | A    | -- | -- | IGR     | SNP | 0.156 | 81 | 15 |
| TPD52       | chr8 | 81029955 | C      | T    | -- | -- | Intron  | SNP | 0.100 | 36 | 4  |
| TPD52       | chr8 | 81077806 | C      | T    | -- | -- | Intron  | SNP | 0.129 | 74 | 11 |
| --          | chr8 | 81157185 | T      | A    | -- | -- | IGR     | SNP | 0.293 | 29 | 12 |
| --          | chr8 | 81239749 | G      | T    | -- | -- | IGR     | SNP | 0.130 | 80 | 12 |
| --          | chr8 | 81369934 | G      | A    | -- | -- | IGR     | SNP | 0.400 | 36 | 24 |
| --          | chr8 | 81482785 | G      | C    | -- | -- | IGR     | SNP | 0.500 | 33 | 33 |
| --          | chr8 | 81809951 | GAAAGA | -    | -- | -- | IGR     | DEL | 0.137 | 63 | 10 |
| --          | chr8 | 82165640 | C      | A    | -- | -- | IGR     | SNP | 0.487 | 59 | 56 |
| --          | chr8 | 82447531 | C      | T    | -- | -- | IGR     | SNP | 0.466 | 39 | 34 |
| --          | chr8 | 82859271 | G      | T    | -- | -- | IGR     | SNP | 0.475 | 31 | 28 |
| --          | chr8 | 82941575 | T      | G    | -- | -- | IGR     | SNP | 0.155 | 60 | 11 |
| --          | chr8 | 82963492 | T      | C    | -- | -- | IGR     | SNP | 0.403 | 43 | 29 |
| --          | chr8 | 83133229 | C      | A    | -- | -- | IGR     | SNP | 0.333 | 34 | 17 |

|         |      |          |     |       |       |       |        |     |       |     |    |
|---------|------|----------|-----|-------|-------|-------|--------|-----|-------|-----|----|
| --      | chr8 | 83227899 | C   | A     | --    | --    | IGR    | SNP | 0.250 | 48  | 16 |
| --      | chr8 | 83227900 | A   | C     | --    | --    | IGR    | SNP | 0.254 | 47  | 16 |
| --      | chr8 | 83618644 | A   | T     | --    | --    | IGR    | SNP | 0.443 | 39  | 31 |
| --      | chr8 | 83900805 | A   | G     | --    | --    | IGR    | SNP | 0.152 | 39  | 7  |
| --      | chr8 | 84115060 | T   | G     | --    | --    | IGR    | SNP | 0.350 | 52  | 28 |
| --      | chr8 | 84238374 | C   | A     | --    | --    | IGR    | SNP | 0.172 | 24  | 5  |
| --      | chr8 | 84352822 | G   | T     | --    | --    | IGR    | SNP | 0.107 | 25  | 3  |
| --      | chr8 | 84393810 | C   | T     | --    | --    | IGR    | SNP | 0.443 | 44  | 35 |
| --      | chr8 | 84452724 | G   | T     | --    | --    | IGR    | SNP | 0.429 | 44  | 33 |
| --      | chr8 | 84532153 | C   | A     | --    | --    | IGR    | SNP | 0.310 | 29  | 13 |
| --      | chr8 | 84558586 | T   | A     | --    | --    | IGR    | SNP | 0.208 | 38  | 10 |
| --      | chr8 | 84629413 | G   | C     | --    | --    | IGR    | SNP | 0.427 | 43  | 32 |
| --      | chr8 | 84643584 | C   | T     | --    | --    | IGR    | SNP | 0.655 | 30  | 57 |
| --      | chr8 | 84854627 | G   | A     | --    | --    | IGR    | SNP | 0.438 | 36  | 28 |
| --      | chr8 | 85039052 | G   | A     | --    | --    | IGR    | SNP | 0.164 | 56  | 11 |
| --      | chr8 | 85078560 | C   | A     | --    | --    | IGR    | SNP | 0.453 | 41  | 34 |
| RALYL   | chr8 | 85168123 | A   | G     | --    | --    | Intron | SNP | 0.265 | 50  | 18 |
| RALYL   | chr8 | 85203669 | T   | G     | --    | --    | Intron | SNP | 0.524 | 30  | 33 |
| RALYL   | chr8 | 85381833 | -   | TTGTC | --    | --    | Intron | INS | 0.136 | 19  | 3  |
| RALYL   | chr8 | 85566413 | A   | G     | --    | --    | Intron | SNP | 0.438 | 27  | 21 |
| RALYL   | chr8 | 85695897 | G   | A     | --    | --    | Intron | SNP | 0.452 | 34  | 28 |
| RALYL   | chr8 | 85716701 | G   | T     | --    | --    | Intron | SNP | 0.181 | 59  | 13 |
| RALYL   | chr8 | 85737021 | G   | A     | --    | --    | Intron | SNP | 0.148 | 69  | 12 |
| --      | chr8 | 86081832 | C   | T     | --    | --    | IGR    | SNP | 0.521 | 35  | 38 |
| CA1     | chr8 | 86264756 | C   | A     | --    | --    | Intron | SNP | 0.186 | 79  | 18 |
| --      | chr8 | 86346935 | C   | G     | --    | --    | IGR    | SNP | 0.537 | 25  | 29 |
| CA3     | chr8 | 86357733 | AAC | -     | --    | --    | Intron | DEL | 0.132 | 45  | 7  |
| CA3     | chr8 | 86358442 | C   | T     | C579T | Y193Y | Silent | SNP | 0.392 | 48  | 31 |
| --      | chr8 | 86529682 | G   | A     | --    | --    | IGR    | SNP | 0.292 | 34  | 14 |
| --      | chr8 | 86559666 | C   | A     | --    | --    | IGR    | SNP | 0.115 | 23  | 3  |
| REXO1L1 | chr8 | 86573328 | G   | C     | --    | --    | 3'UTR  | SNP | 0.171 | 34  | 7  |
| --      | chr8 | 86896004 | G   | T     | --    | --    | IGR    | SNP | 0.102 | 44  | 5  |
| --      | chr8 | 86902640 | T   | G     | --    | --    | IGR    | SNP | 0.364 | 56  | 32 |
| --      | chr8 | 86934829 | A   | T     | --    | --    | IGR    | SNP | 0.255 | 41  | 14 |
| --      | chr8 | 86942063 | T   | A     | --    | --    | IGR    | SNP | 0.259 | 40  | 14 |
| --      | chr8 | 86942114 | G   | C     | --    | --    | IGR    | SNP | 0.340 | 33  | 17 |
| --      | chr8 | 86948104 | C   | G     | --    | --    | IGR    | SNP | 0.479 | 50  | 46 |
| --      | chr8 | 87280674 | A   | G     | --    | --    | IGR    | SNP | 0.163 | 36  | 7  |
| CNGB3   | chr8 | 87676771 | -   | GT    | --    | --    | Intron | INS | 0.348 | 43  | 23 |
| CNBD1   | chr8 | 87963848 | G   | A     | --    | --    | Intron | SNP | 0.174 | 19  | 4  |
| CNBD1   | chr8 | 87974460 | C   | T     | --    | --    | Intron | SNP | 0.547 | 24  | 29 |
| CNBD1   | chr8 | 88155475 | G   | T     | --    | --    | Intron | SNP | 0.137 | 63  | 10 |
| CNBD1   | chr8 | 88273696 | T   | G     | --    | --    | Intron | SNP | 0.222 | 28  | 8  |
| --      | chr8 | 88407742 | G   | A     | --    | --    | IGR    | SNP | 0.304 | 39  | 17 |
| --      | chr8 | 88420244 | C   | T     | --    | --    | IGR    | SNP | 0.631 | 24  | 41 |
| --      | chr8 | 88551102 | -   | GT    | --    | --    | IGR    | INS | 0.273 | 24  | 9  |
| --      | chr8 | 88689353 | G   | T     | --    | --    | IGR    | SNP | 0.155 | 49  | 9  |
| --      | chr8 | 88715579 | A   | C     | --    | --    | IGR    | SNP | 0.366 | 59  | 34 |
| --      | chr8 | 88793459 | G   | A     | --    | --    | IGR    | SNP | 0.377 | 43  | 26 |
| --      | chr8 | 88793918 | G   | T     | --    | --    | IGR    | SNP | 0.338 | 43  | 22 |
| --      | chr8 | 88967164 | C   | G     | --    | --    | IGR    | SNP | 0.536 | 26  | 30 |
| --      | chr8 | 88981124 | TTA | -     | --    | --    | IGR    | DEL | 0.107 | 25  | 3  |
| --      | chr8 | 89011190 | T   | A     | --    | --    | IGR    | SNP | 0.386 | 51  | 32 |
| MMP16   | chr8 | 89074328 | A   | G     | --    | --    | Intron | SNP | 0.236 | 42  | 13 |
| MMP16   | chr8 | 89175022 | A   | G     | --    | --    | Intron | SNP | 0.475 | 52  | 47 |
| MMP16   | chr8 | 89209739 | T   | C     | --    | --    | Intron | SNP | 0.209 | 53  | 14 |
| --      | chr8 | 89678111 | G   | A     | --    | --    | IGR    | SNP | 0.212 | 78  | 21 |
| --      | chr8 | 89975571 | T   | C     | --    | --    | IGR    | SNP | 0.119 | 59  | 8  |
| --      | chr8 | 89978576 | C   | A     | --    | --    | IGR    | SNP | 0.380 | 49  | 30 |
| --      | chr8 | 90043568 | C   | G     | --    | --    | IGR    | SNP | 0.541 | 28  | 33 |
| --      | chr8 | 90270238 | C   | G     | --    | --    | IGR    | SNP | 0.452 | 34  | 28 |
| --      | chr8 | 90293134 | C   | T     | --    | --    | IGR    | SNP | 0.368 | 48  | 28 |
| --      | chr8 | 90355273 | C   | T     | --    | --    | IGR    | SNP | 0.419 | 54  | 39 |
| --      | chr8 | 90584504 | C   | A     | --    | --    | IGR    | SNP | 0.686 | 22  | 48 |
| RIPK2   | chr8 | 90788951 | G   | A     | --    | --    | Intron | SNP | 0.397 | 47  | 31 |
| DECR1   | chr8 | 91038539 | T   | C     | --    | --    | Intron | SNP | 0.143 | 30  | 5  |
| DECR1   | chr8 | 91038550 | G   | A     | --    | --    | Intron | SNP | 0.154 | 33  | 6  |
| --      | chr8 | 91250172 | C   | A     | --    | --    | IGR    | SNP | 0.170 | 78  | 16 |
| --      | chr8 | 91476792 | C   | T     | --    | --    | IGR    | SNP | 0.161 | 78  | 15 |
| --      | chr8 | 91577012 | G   | A     | --    | --    | IGR    | SNP | 0.160 | 110 | 21 |
| --      | chr8 | 91599216 | C   | T     | --    | --    | IGR    | SNP | 0.138 | 25  | 4  |
| NECAB1  | chr8 | 91833999 | T   | G     | --    | --    | Intron | SNP | 0.156 | 54  | 10 |
| NECAB1  | chr8 | 91834148 | A   | T     | --    | --    | Intron | SNP | 0.136 | 57  | 9  |
| NECAB1  | chr8 | 91861940 | G   | T     | --    | --    | Intron | SNP | 0.250 | 12  | 4  |
| NECAB1  | chr8 | 91883954 | A   | G     | --    | --    | Intron | SNP | 0.271 | 35  | 13 |
| NECAB1  | chr8 | 91946193 | G   | T     | --    | --    | Intron | SNP | 0.422 | 37  | 27 |
| --      | chr8 | 92515185 | A   | T     | --    | --    | IGR    | SNP | 0.158 | 64  | 12 |
| --      | chr8 | 92964657 | A   | T     | --    | --    | IGR    | SNP | 0.173 | 43  | 9  |
| --      | chr8 | 93131457 | T   | C     | --    | --    | IGR    | SNP | 0.148 | 52  | 9  |
| --      | chr8 | 93141333 | A   | T     | --    | --    | IGR    | SNP | 0.159 | 69  | 13 |

|             |      |           |    |    |       |       |                 |     |       |     |    |
|-------------|------|-----------|----|----|-------|-------|-----------------|-----|-------|-----|----|
| --          | chr8 | 93321753  | A  | T  | --    | --    | IGR             | SNP | 0.130 | 40  | 6  |
| --          | chr8 | 93323960  | T  | C  | --    | --    | IGR             | SNP | 0.225 | 31  | 9  |
| --          | chr8 | 93661908  | -  | AT | --    | --    | IGR             | INS | 0.254 | 50  | 17 |
| --          | chr8 | 93692091  | T  | C  | --    | --    | IGR             | SNP | 0.458 | 39  | 33 |
| --          | chr8 | 93733428  | T  | A  | --    | --    | IGR             | SNP | 0.271 | 35  | 13 |
| --          | chr8 | 93883257  | T  | G  | --    | --    | IGR             | SNP | 0.518 | 27  | 29 |
| --          | chr8 | 94024276  | C  | T  | --    | --    | IGR             | SNP | 0.261 | 34  | 12 |
| --          | chr8 | 94898031  | C  | T  | --    | --    | IGR             | SNP | 0.500 | 31  | 31 |
| --          | chr8 | 94975452  | G  | T  | --    | --    | IGR             | SNP | 0.300 | 77  | 33 |
| --          | chr8 | 95069065  | G  | C  | --    | --    | IGR             | SNP | 0.400 | 51  | 34 |
| --          | chr8 | 95331129  | G  | C  | --    | --    | IGR             | SNP | 0.289 | 59  | 24 |
| KIAA1429    | chr8 | 95526845  | AG | -  | --    | --    | Intron          | DEL | 0.447 | 42  | 34 |
| DPY19L4     | chr8 | 95788530  | G  | A  | --    | --    | Intron          | SNP | 0.143 | 48  | 8  |
| INTS8       | chr8 | 95847075  | C  | T  | --    | --    | Intron          | SNP | 0.434 | 43  | 33 |
| --          | chr8 | 95988439  | T  | A  | --    | --    | IGR             | SNP | 0.250 | 12  | 4  |
| LOC10061655 | chr8 | 96306580  | A  | T  | --    | --    | RNA             | SNP | 0.229 | 81  | 24 |
| LOC10061655 | chr8 | 96315970  | G  | T  | --    | --    | RNA             | SNP | 0.222 | 56  | 16 |
| LOC10061655 | chr8 | 96487001  | G  | T  | --    | --    | RNA             | SNP | 0.278 | 52  | 20 |
| --          | chr8 | 96930757  | C  | T  | --    | --    | IGR             | SNP | 0.120 | 88  | 12 |
| --          | chr8 | 97071772  | C  | T  | --    | --    | IGR             | SNP | 0.655 | 20  | 38 |
| PTDSS1      | chr8 | 97333158  | T  | A  | --    | --    | Intron          | SNP | 0.569 | 31  | 41 |
| --          | chr8 | 97353067  | G  | A  | --    | --    | IGR             | SNP | 0.474 | 41  | 37 |
| --          | chr8 | 97431200  | G  | T  | --    | --    | IGR             | SNP | 0.154 | 22  | 4  |
| --          | chr8 | 97447248  | C  | T  | --    | --    | IGR             | SNP | 0.138 | 81  | 13 |
| SDC2        | chr8 | 97512950  | T  | A  | --    | --    | Intron          | SNP | 0.111 | 40  | 5  |
| PGCP        | chr8 | 97706531  | C  | A  | --    | --    | Intron          | SNP | 0.371 | 39  | 23 |
| --          | chr8 | 98374786  | T  | C  | --    | --    | IGR             | SNP | 0.608 | 29  | 45 |
| --          | chr8 | 98610124  | C  | T  | --    | --    | IGR             | SNP | 0.149 | 40  | 7  |
| --          | chr8 | 98651487  | G  | A  | --    | --    | IGR             | SNP | 0.129 | 27  | 4  |
| --          | chr8 | 98768564  | A  | T  | --    | --    | IGR             | SNP | 0.217 | 47  | 13 |
| --          | chr8 | 98771749  | A  | G  | --    | --    | IGR             | SNP | 0.128 | 41  | 6  |
| MATN2       | chr8 | 98887942  | G  | T  | --    | --    | Intron          | SNP | 0.267 | 11  | 4  |
| MATN2       | chr8 | 98924034  | G  | A  | --    | --    | Intron          | SNP | 0.460 | 54  | 46 |
| RPL30       | chr8 | 99058665  | G  | C  | --    | --    | 5'Flank         | SNP | 0.397 | 47  | 31 |
| RPL30       | chr8 | 99058666  | A  | T  | --    | --    | 5'Flank         | SNP | 0.390 | 47  | 30 |
| NIPAL2      | chr8 | 99273226  | G  | T  | --    | --    | Intron          | SNP | 0.107 | 25  | 3  |
| STK3        | chr8 | 99586176  | C  | A  | --    | --    | Intron          | SNP | 0.110 | 73  | 9  |
| VPS13B      | chr8 | 100155865 | A  | T  | --    | --    | Intron          | SNP | 0.108 | 58  | 7  |
| VPS13B      | chr8 | 100283737 | A  | T  | --    | --    | Intron          | SNP | 0.197 | 57  | 14 |
| VPS13B      | chr8 | 100659842 | T  | A  | --    | --    | Intron          | SNP | 0.175 | 52  | 11 |
| COX6C       | chr8 | 100896740 | T  | A  | --    | --    | Intron          | SNP | 0.377 | 101 | 61 |
| --          | chr8 | 101129982 | G  | C  | --    | --    | IGR             | SNP | 0.158 | 64  | 12 |
| --          | chr8 | 101752904 | C  | G  | --    | --    | IGR             | SNP | 0.695 | 25  | 57 |
| --          | chr8 | 101753784 | C  | T  | --    | --    | IGR             | SNP | 0.642 | 38  | 68 |
| --          | chr8 | 101885679 | C  | T  | --    | --    | IGR             | SNP | 0.242 | 94  | 30 |
| --          | chr8 | 103174154 | C  | T  | --    | --    | IGR             | SNP | 0.291 | 100 | 41 |
| --          | chr8 | 103655423 | G  | C  | --    | --    | IGR             | SNP | 0.214 | 88  | 24 |
| KLF10       | chr8 | 103660043 | G  | C  | --    | --    | 3'Flank         | SNP | 0.224 | 114 | 33 |
| --          | chr8 | 103680847 | A  | C  | --    | --    | IGR             | SNP | 0.245 | 80  | 26 |
| --          | chr8 | 103908214 | C  | T  | --    | --    | IGR             | SNP | 0.300 | 84  | 36 |
| --          | chr8 | 103950949 | G  | A  | --    | --    | IGR             | SNP | 0.149 | 103 | 18 |
| --          | chr8 | 103975484 | TG | -  | --    | --    | IGR             | DEL | 0.319 | 32  | 15 |
| ATP6V1C1    | chr8 | 104046036 | G  | T  | --    | --    | Intron          | SNP | 0.238 | 99  | 31 |
| --          | chr8 | 104278452 | G  | T  | --    | --    | IGR             | SNP | 0.258 | 72  | 25 |
| DCAF13      | chr8 | 104432672 | C  | T  | C707T | S236F | Missense_mutati | SNP | 0.651 | 37  | 69 |
| DCAF13      | chr8 | 104433001 | C  | T  | --    | --    | Intron          | SNP | 0.663 | 33  | 65 |
| DCAF13      | chr8 | 104433385 | C  | T  | --    | --    | Intron          | SNP | 0.682 | 28  | 60 |
| RIMS2       | chr8 | 104665884 | G  | T  | --    | --    | Intron          | SNP | 0.111 | 104 | 13 |
| RIMS2       | chr8 | 104730446 | G  | C  | --    | --    | Intron          | SNP | 0.359 | 84  | 47 |
| RIMS2       | chr8 | 104930334 | TA | -  | --    | --    | Intron          | DEL | 0.167 | 65  | 13 |
| RIMS2       | chr8 | 104933741 | C  | G  | --    | --    | Intron          | SNP | 0.159 | 74  | 14 |
| RIMS2       | chr8 | 105110334 | C  | G  | --    | --    | Intron          | SNP | 0.276 | 63  | 24 |
| RIMS2       | chr8 | 105116720 | AG | -  | --    | --    | Intron          | DEL | 0.252 | 77  | 26 |
| RIMS2       | chr8 | 105211416 | A  | T  | --    | --    | Intron          | SNP | 0.113 | 47  | 6  |
| --          | chr8 | 105290296 | C  | A  | --    | --    | IGR             | SNP | 0.321 | 74  | 35 |
| --          | chr8 | 105296456 | T  | A  | --    | --    | IGR             | SNP | 0.307 | 61  | 27 |
| --          | chr8 | 105323362 | G  | T  | --    | --    | IGR             | SNP | 0.277 | 34  | 13 |
| DPYS        | chr8 | 105406865 | A  | G  | --    | --    | Intron          | SNP | 0.105 | 111 | 13 |
| DPYS        | chr8 | 105415216 | G  | T  | --    | --    | Intron          | SNP | 0.103 | 113 | 13 |
| DPYS        | chr8 | 105419113 | C  | A  | --    | --    | Intron          | SNP | 0.380 | 85  | 52 |
| LRP12       | chr8 | 105515151 | C  | T  | --    | --    | Intron          | SNP | 0.460 | 47  | 40 |
| LRP12       | chr8 | 105561774 | G  | A  | --    | --    | Intron          | SNP | 0.136 | 70  | 11 |
| --          | chr8 | 105659398 | A  | G  | --    | --    | IGR             | SNP | 0.127 | 96  | 14 |
| --          | chr8 | 105680096 | TA | -  | --    | --    | IGR             | DEL | 0.169 | 64  | 13 |
| --          | chr8 | 105753286 | T  | C  | --    | --    | IGR             | SNP | 0.455 | 6   | 5  |
| --          | chr8 | 105753452 | C  | T  | --    | --    | IGR             | SNP | 0.455 | 6   | 5  |
| --          | chr8 | 105815219 | C  | T  | --    | --    | IGR             | SNP | 0.300 | 63  | 27 |
| --          | chr8 | 106106014 | A  | G  | --    | --    | IGR             | SNP | 0.356 | 47  | 26 |
| --          | chr8 | 106116422 | T  | C  | --    | --    | IGR             | SNP | 0.409 | 55  | 38 |
| --          | chr8 | 106210131 | C  | A  | --    | --    | IGR             | SNP | 0.124 | 106 | 15 |



|         |      |           |    |    |    |    |        |     |       |     |     |
|---------|------|-----------|----|----|----|----|--------|-----|-------|-----|-----|
| ZFPM2   | chr8 | 106350707 | A  | T  | -- | -- | Intron | SNP | 0.392 | 62  | 40  |
| ZFPM2   | chr8 | 106478315 | T  | A  | -- | -- | Intron | SNP | 0.187 | 61  | 14  |
| --      | chr8 | 106949420 | G  | C  | -- | -- | IGR    | SNP | 0.299 | 68  | 29  |
| --      | chr8 | 107028708 | A  | C  | -- | -- | IGR    | SNP | 0.395 | 52  | 34  |
| OXR1    | chr8 | 107373574 | T  | A  | -- | -- | Intron | SNP | 0.305 | 73  | 32  |
| OXR1    | chr8 | 107374433 | C  | G  | -- | -- | Intron | SNP | 0.711 | 35  | 86  |
| OXR1    | chr8 | 107564134 | A  | T  | -- | -- | Intron | SNP | 0.250 | 24  | 8   |
| OXR1    | chr8 | 107595141 | C  | A  | -- | -- | Intron | SNP | 0.100 | 72  | 8   |
| OXR1    | chr8 | 107595142 | T  | C  | -- | -- | Intron | SNP | 0.113 | 71  | 9   |
| OXR1    | chr8 | 107760034 | C  | T  | -- | -- | Intron | SNP | 0.630 | 40  | 68  |
| --      | chr8 | 108114734 | T  | C  | -- | -- | IGR    | SNP | 0.175 | 80  | 17  |
| --      | chr8 | 108153315 | T  | C  | -- | -- | IGR    | SNP | 0.155 | 93  | 17  |
| --      | chr8 | 108235133 | T  | C  | -- | -- | IGR    | SNP | 0.359 | 66  | 37  |
| ANGPT1  | chr8 | 108359127 | A  | T  | -- | -- | Intron | SNP | 0.308 | 83  | 37  |
| --      | chr8 | 108706680 | G  | A  | -- | -- | IGR    | SNP | 0.169 | 113 | 23  |
| --      | chr8 | 108728019 | C  | A  | -- | -- | IGR    | SNP | 0.278 | 13  | 5   |
| --      | chr8 | 108835713 | G  | T  | -- | -- | IGR    | SNP | 0.108 | 66  | 8   |
| --      | chr8 | 108869239 | G  | C  | -- | -- | IGR    | SNP | 0.347 | 64  | 34  |
| --      | chr8 | 108869251 | G  | A  | -- | -- | IGR    | SNP | 0.337 | 69  | 35  |
| --      | chr8 | 109285935 | C  | A  | -- | -- | IGR    | SNP | 0.130 | 94  | 14  |
| --      | chr8 | 109638907 | T  | G  | -- | -- | IGR    | SNP | 0.103 | 140 | 16  |
| --      | chr8 | 109643575 | A  | G  | -- | -- | IGR    | SNP | 0.135 | 90  | 14  |
| --      | chr8 | 109667592 | G  | C  | -- | -- | IGR    | SNP | 0.214 | 66  | 18  |
| --      | chr8 | 109712456 | T  | C  | -- | -- | IGR    | SNP | 0.250 | 72  | 24  |
| --      | chr8 | 109752718 | C  | G  | -- | -- | IGR    | SNP | 0.408 | 77  | 53  |
| --      | chr8 | 109833618 | G  | C  | -- | -- | IGR    | SNP | 0.305 | 73  | 32  |
| --      | chr8 | 109928233 | C  | A  | -- | -- | IGR    | SNP | 0.101 | 80  | 9   |
| NUDCD1  | chr8 | 110324302 | C  | G  | -- | -- | Intron | SNP | 0.143 | 42  | 7   |
| PKHD1L1 | chr8 | 110533037 | C  | A  | -- | -- | Intron | SNP | 0.665 | 52  | 103 |
| --      | chr8 | 110707216 | -  | AT | -- | -- | IGR    | INS | 0.253 | 62  | 21  |
| --      | chr8 | 110806078 | A  | C  | -- | -- | IGR    | SNP | 0.186 | 83  | 19  |
| --      | chr8 | 110961960 | GT | -  | -- | -- | IGR    | DEL | 0.753 | 21  | 64  |
| --      | chr8 | 110975633 | T  | G  | -- | -- | IGR    | SNP | 0.174 | 38  | 8   |
| --      | chr8 | 110998881 | T  | C  | -- | -- | IGR    | SNP | 0.115 | 85  | 11  |
| --      | chr8 | 111011078 | C  | A  | -- | -- | IGR    | SNP | 0.198 | 69  | 17  |
| --      | chr8 | 111211219 | GA | -  | -- | -- | IGR    | DEL | 0.670 | 32  | 65  |
| --      | chr8 | 111398676 | T  | G  | -- | -- | IGR    | SNP | 0.156 | 38  | 7   |
| --      | chr8 | 111696868 | C  | T  | -- | -- | IGR    | SNP | 0.297 | 45  | 19  |
| --      | chr8 | 111738880 | A  | G  | -- | -- | IGR    | SNP | 0.268 | 60  | 22  |
| --      | chr8 | 111795395 | T  | C  | -- | -- | IGR    | SNP | 0.149 | 74  | 13  |
| --      | chr8 | 112196797 | C  | G  | -- | -- | IGR    | SNP | 0.235 | 52  | 16  |
| --      | chr8 | 112280474 | TC | -  | -- | -- | IGR    | DEL | 0.104 | 86  | 10  |
| --      | chr8 | 112283188 | C  | A  | -- | -- | IGR    | SNP | 0.348 | 60  | 32  |
| --      | chr8 | 112352119 | C  | A  | -- | -- | IGR    | SNP | 0.115 | 69  | 9   |
| --      | chr8 | 112418612 | T  | A  | -- | -- | IGR    | SNP | 0.289 | 64  | 26  |
| --      | chr8 | 112485913 | A  | T  | -- | -- | IGR    | SNP | 0.143 | 78  | 13  |
| --      | chr8 | 112501515 | G  | A  | -- | -- | IGR    | SNP | 0.272 | 59  | 22  |
| --      | chr8 | 112612781 | A  | G  | -- | -- | IGR    | SNP | 0.362 | 60  | 34  |
| --      | chr8 | 112661958 | T  | A  | -- | -- | IGR    | SNP | 0.103 | 87  | 10  |
| --      | chr8 | 113002896 | A  | C  | -- | -- | IGR    | SNP | 0.424 | 38  | 28  |
| --      | chr8 | 113038798 | C  | T  | -- | -- | IGR    | SNP | 0.103 | 78  | 9   |
| --      | chr8 | 113100715 | C  | G  | -- | -- | IGR    | SNP | 0.320 | 68  | 32  |
| --      | chr8 | 113143997 | G  | A  | -- | -- | IGR    | SNP | 0.114 | 39  | 5   |
| --      | chr8 | 113173925 | T  | C  | -- | -- | IGR    | SNP | 0.111 | 64  | 8   |
| --      | chr8 | 113228201 | G  | A  | -- | -- | IGR    | SNP | 0.250 | 60  | 20  |
| CSMD3   | chr8 | 113256855 | A  | T  | -- | -- | Intron | SNP | 0.104 | 60  | 7   |
| CSMD3   | chr8 | 113484096 | C  | A  | -- | -- | Intron | SNP | 0.189 | 90  | 21  |
| CSMD3   | chr8 | 113618724 | C  | A  | -- | -- | Intron | SNP | 0.286 | 100 | 40  |
| CSMD3   | chr8 | 113838576 | G  | T  | -- | -- | Intron | SNP | 0.145 | 100 | 17  |
| CSMD3   | chr8 | 114022054 | G  | T  | -- | -- | Intron | SNP | 0.391 | 42  | 27  |
| CSMD3   | chr8 | 114121166 | A  | G  | -- | -- | Intron | SNP | 0.102 | 79  | 9   |
| CSMD3   | chr8 | 114225992 | C  | T  | -- | -- | Intron | SNP | 0.418 | 46  | 33  |
| CSMD3   | chr8 | 114261052 | C  | G  | -- | -- | Intron | SNP | 0.316 | 52  | 24  |
| CSMD3   | chr8 | 114392301 | C  | T  | -- | -- | Intron | SNP | 0.663 | 34  | 67  |
| CSMD3   | chr8 | 114413033 | T  | A  | -- | -- | Intron | SNP | 0.163 | 72  | 14  |
| CSMD3   | chr8 | 114441564 | C  | T  | -- | -- | Intron | SNP | 0.145 | 71  | 12  |
| CSMD3   | chr8 | 114443846 | G  | T  | -- | -- | Intron | SNP | 0.195 | 70  | 17  |
| --      | chr8 | 114476287 | C  | T  | -- | -- | IGR    | SNP | 0.290 | 88  | 36  |
| --      | chr8 | 114490394 | A  | C  | -- | -- | IGR    | SNP | 0.300 | 56  | 24  |
| --      | chr8 | 114614809 | C  | A  | -- | -- | IGR    | SNP | 0.220 | 99  | 28  |
| --      | chr8 | 114657051 | C  | G  | -- | -- | IGR    | SNP | 0.139 | 62  | 10  |
| --      | chr8 | 114715129 | T  | A  | -- | -- | IGR    | SNP | 0.408 | 71  | 49  |
| --      | chr8 | 114730936 | G  | A  | -- | -- | IGR    | SNP | 0.310 | 80  | 36  |
| --      | chr8 | 114805137 | A  | G  | -- | -- | IGR    | SNP | 0.220 | 85  | 24  |
| --      | chr8 | 114887111 | G  | C  | -- | -- | IGR    | SNP | 0.150 | 96  | 17  |
| --      | chr8 | 114897632 | A  | C  | -- | -- | IGR    | SNP | 0.256 | 61  | 21  |
| --      | chr8 | 115216168 | G  | A  | -- | -- | IGR    | SNP | 0.131 | 53  | 8   |
| --      | chr8 | 115303427 | A  | T  | -- | -- | IGR    | SNP | 0.141 | 61  | 10  |
| --      | chr8 | 115530605 | G  | A  | -- | -- | IGR    | SNP | 0.685 | 46  | 100 |
| --      | chr8 | 115542512 | C  | A  | -- | -- | IGR    | SNP | 0.325 | 81  | 39  |

|         |      |           |     |     |    |    |        |     |       |     |    |
|---------|------|-----------|-----|-----|----|----|--------|-----|-------|-----|----|
| --      | chr8 | 115578694 | C   | G   | -- | -- | IGR    | SNP | 0.386 | 43  | 27 |
| --      | chr8 | 115585128 | T   | A   | -- | -- | IGR    | SNP | 0.178 | 60  | 13 |
| --      | chr8 | 115707424 | G   | A   | -- | -- | IGR    | SNP | 0.330 | 59  | 29 |
| --      | chr8 | 115714900 | T   | A   | -- | -- | IGR    | SNP | 0.159 | 53  | 10 |
| --      | chr8 | 115884800 | T   | A   | -- | -- | IGR    | SNP | 0.264 | 67  | 24 |
| --      | chr8 | 115906937 | T   | C   | -- | -- | IGR    | SNP | 0.390 | 36  | 23 |
| --      | chr8 | 115975312 | A   | C   | -- | -- | IGR    | SNP | 0.392 | 62  | 40 |
| --      | chr8 | 116026336 | G   | A   | -- | -- | IGR    | SNP | 0.387 | 46  | 29 |
| --      | chr8 | 116069614 | G   | T   | -- | -- | IGR    | SNP | 0.119 | 59  | 8  |
| --      | chr8 | 116097104 | C   | A   | -- | -- | IGR    | SNP | 0.337 | 63  | 32 |
| --      | chr8 | 116125909 | T   | A   | -- | -- | IGR    | SNP | 0.221 | 74  | 21 |
| --      | chr8 | 116330915 | T   | A   | -- | -- | IGR    | SNP | 0.286 | 50  | 20 |
| --      | chr8 | 116357369 | C   | A   | -- | -- | IGR    | SNP | 0.171 | 68  | 14 |
| TRPS1   | chr8 | 116454126 | -   | AGT | -- | -- | Intron | INS | 0.109 | 57  | 7  |
| TRPS1   | chr8 | 116468292 | G   | A   | -- | -- | Intron | SNP | 0.210 | 64  | 17 |
| TRPS1   | chr8 | 116524740 | T   | G   | -- | -- | Intron | SNP | 0.250 | 54  | 18 |
| TRPS1   | chr8 | 116628457 | T   | A   | -- | -- | Intron | SNP | 0.333 | 66  | 33 |
| TRPS1   | chr8 | 116661481 | G   | T   | -- | -- | Intron | SNP | 0.194 | 79  | 19 |
| --      | chr8 | 116844852 | GA  | -   | -- | -- | IGR    | DEL | 0.105 | 94  | 11 |
| --      | chr8 | 116849936 | C   | G   | -- | -- | IGR    | SNP | 0.369 | 53  | 31 |
| --      | chr8 | 116857986 | A   | T   | -- | -- | IGR    | SNP | 0.133 | 72  | 11 |
| --      | chr8 | 116882733 | A   | T   | -- | -- | IGR    | SNP | 0.105 | 85  | 10 |
| --      | chr8 | 117027318 | A   | C   | -- | -- | IGR    | SNP | 0.324 | 75  | 36 |
| --      | chr8 | 117058177 | T   | C   | -- | -- | IGR    | SNP | 0.115 | 100 | 13 |
| --      | chr8 | 117275832 | G   | C   | -- | -- | IGR    | SNP | 0.366 | 64  | 37 |
| --      | chr8 | 117384132 | C   | G   | -- | -- | IGR    | SNP | 0.129 | 88  | 13 |
| --      | chr8 | 117472226 | T   | C   | -- | -- | IGR    | SNP | 0.340 | 64  | 33 |
| --      | chr8 | 117487264 | T   | G   | -- | -- | IGR    | SNP | 0.275 | 87  | 33 |
| --      | chr8 | 117540589 | A   | G   | -- | -- | IGR    | SNP | 0.233 | 66  | 20 |
| --      | chr8 | 117890583 | T   | A   | -- | -- | IGR    | SNP | 0.121 | 94  | 13 |
| SLC30A8 | chr8 | 118014546 | G   | A   | -- | -- | Intron | SNP | 0.118 | 97  | 13 |
| SLC30A8 | chr8 | 118041217 | A   | T   | -- | -- | Intron | SNP | 0.137 | 82  | 13 |
| --      | chr8 | 118361859 | C   | G   | -- | -- | IGR    | SNP | 0.203 | 47  | 12 |
| --      | chr8 | 118578388 | C   | G   | -- | -- | IGR    | SNP | 0.657 | 23  | 44 |
| --      | chr8 | 118585668 | A   | T   | -- | -- | IGR    | SNP | 0.129 | 128 | 19 |
| --      | chr8 | 118620003 | C   | T   | -- | -- | IGR    | SNP | 0.115 | 85  | 11 |
| SAMD12  | chr8 | 119288606 | T   | A   | -- | -- | Intron | SNP | 0.115 | 100 | 13 |
| SAMD12  | chr8 | 119333549 | G   | T   | -- | -- | Intron | SNP | 0.204 | 43  | 11 |
| SAMD12  | chr8 | 119442003 | G   | A   | -- | -- | Intron | SNP | 0.215 | 73  | 20 |
| SAMD12  | chr8 | 119600012 | T   | C   | -- | -- | Intron | SNP | 0.117 | 113 | 15 |
| --      | chr8 | 119803905 | G   | A   | -- | -- | IGR    | SNP | 0.323 | 63  | 30 |
| --      | chr8 | 119990823 | A   | T   | -- | -- | IGR    | SNP | 0.284 | 48  | 19 |
| --      | chr8 | 119990885 | A   | G   | -- | -- | IGR    | SNP | 0.309 | 47  | 21 |
| MAL2    | chr8 | 120256394 | T   | C   | -- | -- | 3'UTR  | SNP | 0.240 | 79  | 25 |
| --      | chr8 | 120361347 | A   | C   | -- | -- | IGR    | SNP | 0.102 | 114 | 13 |
| --      | chr8 | 120379775 | T   | A   | -- | -- | IGR    | SNP | 0.403 | 43  | 29 |
| --      | chr8 | 120489887 | C   | G   | -- | -- | IGR    | SNP | 0.167 | 15  | 3  |
| --      | chr8 | 120489898 | A   | T   | -- | -- | IGR    | SNP | 0.136 | 19  | 3  |
| --      | chr8 | 120511000 | -   | TAC | -- | -- | IGR    | INS | 0.103 | 26  | 3  |
| --      | chr8 | 120511315 | ATG | -   | -- | -- | IGR    | DEL | 0.159 | 37  | 7  |
| --      | chr8 | 120511325 | G   | A   | -- | -- | IGR    | SNP | 0.135 | 45  | 7  |
| --      | chr8 | 120511344 | ATG | -   | -- | -- | IGR    | DEL | 0.153 | 50  | 9  |
| DEPTOR  | chr8 | 120892931 | C   | G   | -- | -- | Intron | SNP | 0.691 | 34  | 76 |
| DEPTOR  | chr8 | 120993005 | G   | A   | -- | -- | Intron | SNP | 0.718 | 31  | 79 |
| COL14A1 | chr8 | 121202785 | A   | G   | -- | -- | Intron | SNP | 0.108 | 33  | 4  |
| COL14A1 | chr8 | 121360546 | CAT | -   | -- | -- | Intron | DEL | 0.108 | 33  | 4  |
| COL14A1 | chr8 | 121381983 | C   | A   | -- | -- | Intron | SNP | 0.316 | 91  | 42 |
| SNTB1   | chr8 | 121764694 | G   | T   | -- | -- | Intron | SNP | 0.108 | 124 | 15 |
| --      | chr8 | 122460828 | G   | C   | -- | -- | IGR    | SNP | 0.325 | 83  | 40 |
| --      | chr8 | 122809170 | C   | G   | -- | -- | IGR    | SNP | 0.103 | 70  | 8  |
| --      | chr8 | 122897959 | A   | G   | -- | -- | IGR    | SNP | 0.136 | 95  | 15 |
| --      | chr8 | 123136589 | C   | A   | -- | -- | IGR    | SNP | 0.124 | 99  | 14 |
| --      | chr8 | 123150886 | G   | A   | -- | -- | IGR    | SNP | 0.627 | 44  | 74 |
| --      | chr8 | 123196217 | A   | C   | -- | -- | IGR    | SNP | 0.115 | 85  | 11 |
| --      | chr8 | 123258880 | G   | A   | -- | -- | IGR    | SNP | 0.233 | 23  | 7  |
| --      | chr8 | 123319177 | G   | A   | -- | -- | IGR    | SNP | 0.218 | 97  | 27 |
| --      | chr8 | 124586815 | C   | T   | -- | -- | IGR    | SNP | 0.104 | 95  | 11 |
| KLHL38  | chr8 | 124662306 | A   | C   | -- | -- | Intron | SNP | 0.211 | 45  | 12 |
| --      | chr8 | 124846757 | T   | G   | -- | -- | IGR    | SNP | 0.327 | 68  | 33 |
| --      | chr8 | 125315385 | G   | T   | -- | -- | IGR    | SNP | 0.411 | 43  | 30 |
| --      | chr8 | 125408777 | C   | G   | -- | -- | IGR    | SNP | 0.132 | 118 | 18 |
| NSMCE2  | chr8 | 126254714 | A   | G   | -- | -- | Intron | SNP | 0.222 | 98  | 28 |
| --      | chr8 | 126646339 | G   | C   | -- | -- | IGR    | SNP | 0.154 | 22  | 4  |
| --      | chr8 | 126646343 | T   | C   | -- | -- | IGR    | SNP | 0.133 | 26  | 4  |
| --      | chr8 | 126733695 | TA  | -   | -- | -- | IGR    | DEL | 0.171 | 92  | 19 |
| --      | chr8 | 126748880 | G   | A   | -- | -- | IGR    | SNP | 0.273 | 80  | 30 |
| --      | chr8 | 127426720 | T   | C   | -- | -- | IGR    | SNP | 0.118 | 45  | 6  |
| --      | chr8 | 127620263 | A   | C   | -- | -- | IGR    | SNP | 0.163 | 36  | 7  |
| --      | chr8 | 127695812 | C   | T   | -- | -- | IGR    | SNP | 0.288 | 79  | 32 |
| --      | chr8 | 127741839 | C   | A   | -- | -- | IGR    | SNP | 0.125 | 77  | 11 |

|                |      |           |       |     |    |    |        |     |       |     |    |
|----------------|------|-----------|-------|-----|----|----|--------|-----|-------|-----|----|
| --             | chr8 | 127840644 | T     | C   | -- | -- | IGR    | SNP | 0.250 | 105 | 35 |
| --             | chr8 | 128206387 | G     | A   | -- | -- | IGR    | SNP | 0.472 | 19  | 17 |
| --             | chr8 | 128327163 | C     | A   | -- | -- | IGR    | SNP | 0.111 | 32  | 4  |
| --             | chr8 | 128593962 | G     | A   | -- | -- | IGR    | SNP | 0.115 | 146 | 19 |
| <i>PVT1</i>    | chr8 | 128841417 | G     | A   | -- | -- | RNA    | SNP | 0.100 | 126 | 14 |
| <i>PVT1</i>    | chr8 | 128900177 | G     | T   | -- | -- | RNA    | SNP | 0.100 | 27  | 3  |
| --             | chr8 | 129253249 | CT    | -   | -- | -- | IGR    | DEL | 0.115 | 23  | 3  |
| --             | chr8 | 129253253 | CT    | -   | -- | -- | IGR    | DEL | 0.154 | 22  | 4  |
| --             | chr8 | 129265340 | T     | A   | -- | -- | IGR    | SNP | 0.336 | 79  | 40 |
| --             | chr8 | 129437063 | T     | A   | -- | -- | IGR    | SNP | 0.122 | 36  | 5  |
| --             | chr8 | 129539588 | T     | G   | -- | -- | IGR    | SNP | 0.264 | 53  | 19 |
| --             | chr8 | 129629136 | C     | G   | -- | -- | IGR    | SNP | 0.141 | 79  | 13 |
| --             | chr8 | 129715239 | A     | C   | -- | -- | IGR    | SNP | 0.151 | 101 | 18 |
| --             | chr8 | 129816909 | C     | T   | -- | -- | IGR    | SNP | 0.677 | 10  | 21 |
| --             | chr8 | 129853738 | T     | G   | -- | -- | IGR    | SNP | 0.333 | 52  | 26 |
| --             | chr8 | 129866505 | G     | A   | -- | -- | IGR    | SNP | 0.678 | 37  | 78 |
| --             | chr8 | 130047176 | C     | A   | -- | -- | IGR    | SNP | 0.667 | 43  | 86 |
| --             | chr8 | 130111014 | G     | T   | -- | -- | IGR    | SNP | 0.108 | 33  | 4  |
| --             | chr8 | 130280866 | T     | C   | -- | -- | IGR    | SNP | 0.357 | 83  | 46 |
| --             | chr8 | 130319043 | G     | A   | -- | -- | IGR    | SNP | 0.137 | 126 | 20 |
| --             | chr8 | 130358396 | A     | C   | -- | -- | IGR    | SNP | 0.347 | 64  | 34 |
| --             | chr8 | 130361066 | A     | C   | -- | -- | IGR    | SNP | 0.429 | 44  | 33 |
| --             | chr8 | 130388055 | T     | A   | -- | -- | IGR    | SNP | 0.153 | 111 | 20 |
| --             | chr8 | 130438292 | G     | C   | -- | -- | IGR    | SNP | 0.310 | 69  | 31 |
| --             | chr8 | 130507904 | GTA   | -   | -- | -- | IGR    | DEL | 0.133 | 13  | 2  |
| --             | chr8 | 130572881 | T     | C   | -- | -- | IGR    | SNP | 0.174 | 95  | 20 |
| --             | chr8 | 130594726 | C     | G   | -- | -- | IGR    | SNP | 0.584 | 47  | 66 |
| --             | chr8 | 130822560 | G     | C   | -- | -- | IGR    | SNP | 0.313 | 110 | 50 |
| --             | chr8 | 131038631 | G     | C   | -- | -- | IGR    | SNP | 0.305 | 82  | 36 |
| --             | chr8 | 131061654 | C     | T   | -- | -- | IGR    | SNP | 0.192 | 21  | 5  |
| --             | chr8 | 131062178 | G     | A   | -- | -- | IGR    | SNP | 0.186 | 35  | 8  |
| --             | chr8 | 131511931 | AG    | -   | -- | -- | IGR    | DEL | 0.256 | 119 | 41 |
| --             | chr8 | 131670538 | C     | A   | -- | -- | IGR    | SNP | 0.121 | 94  | 13 |
| --             | chr8 | 131670539 | A     | C   | -- | -- | IGR    | SNP | 0.123 | 93  | 13 |
| <i>ADCY8</i>   | chr8 | 131853606 | G     | C   | -- | -- | Intron | SNP | 0.250 | 93  | 31 |
| <i>ADCY8</i>   | chr8 | 131872701 | T     | C   | -- | -- | Intron | SNP | 0.288 | 57  | 23 |
| <i>ADCY8</i>   | chr8 | 131875796 | T     | G   | -- | -- | Intron | SNP | 0.100 | 81  | 9  |
| --             | chr8 | 132059071 | G     | T   | -- | -- | IGR    | SNP | 0.115 | 116 | 15 |
| --             | chr8 | 132069053 | C     | T   | -- | -- | IGR    | SNP | 0.220 | 78  | 22 |
| --             | chr8 | 132077134 | G     | A   | -- | -- | IGR    | SNP | 0.200 | 16  | 4  |
| --             | chr8 | 132239537 | -     | GAC | -- | -- | IGR    | INS | 0.211 | 95  | 26 |
| --             | chr8 | 132281122 | T     | C   | -- | -- | IGR    | SNP | 0.102 | 44  | 5  |
| --             | chr8 | 132281335 | A     | G   | -- | -- | IGR    | SNP | 0.163 | 36  | 7  |
| --             | chr8 | 132445903 | A     | T   | -- | -- | IGR    | SNP | 0.106 | 118 | 14 |
| --             | chr8 | 132572711 | C     | A   | -- | -- | IGR    | SNP | 0.651 | 37  | 69 |
| --             | chr8 | 132615955 | G     | A   | -- | -- | IGR    | SNP | 0.171 | 58  | 12 |
| --             | chr8 | 132630711 | A     | G   | -- | -- | IGR    | SNP | 0.190 | 81  | 19 |
| --             | chr8 | 132764067 | AAGAT | -   | -- | -- | IGR    | DEL | 0.310 | 69  | 31 |
| --             | chr8 | 132861441 | G     | T   | -- | -- | IGR    | SNP | 0.655 | 29  | 55 |
| --             | chr8 | 132868620 | G     | T   | -- | -- | IGR    | SNP | 0.341 | 56  | 29 |
| <i>EFR3A</i>   | chr8 | 132970093 | A     | T   | -- | -- | Intron | SNP | 0.119 | 89  | 12 |
| --             | chr8 | 133122635 | T     | C   | -- | -- | IGR    | SNP | 0.133 | 104 | 16 |
| <i>KCNQ3</i>   | chr8 | 133164533 | TG    | -   | -- | -- | Intron | DEL | 0.117 | 91  | 12 |
| <i>KCNQ3</i>   | chr8 | 133305833 | A     | T   | -- | -- | Intron | SNP | 0.102 | 150 | 17 |
| <i>KCNQ3</i>   | chr8 | 133398451 | G     | A   | -- | -- | Intron | SNP | 0.176 | 42  | 9  |
| --             | chr8 | 133519061 | T     | C   | -- | -- | IGR    | SNP | 0.110 | 146 | 18 |
| <i>TMEM71</i>  | chr8 | 133755569 | T     | A   | -- | -- | Intron | SNP | 0.115 | 100 | 13 |
| <i>TMEM71</i>  | chr8 | 133769344 | G     | A   | -- | -- | Intron | SNP | 0.489 | 24  | 23 |
| --             | chr8 | 134157109 | G     | T   | -- | -- | IGR    | SNP | 0.348 | 88  | 47 |
| --             | chr8 | 134187891 | C     | G   | -- | -- | IGR    | SNP | 0.133 | 117 | 18 |
| <i>ST3GAL1</i> | chr8 | 134479901 | C     | T   | -- | -- | Intron | SNP | 0.357 | 72  | 40 |
| <i>ST3GAL1</i> | chr8 | 134549283 | C     | A   | -- | -- | Intron | SNP | 0.139 | 99  | 16 |
| --             | chr8 | 134770017 | G     | A   | -- | -- | IGR    | SNP | 0.133 | 26  | 4  |
| --             | chr8 | 134889854 | C     | T   | -- | -- | IGR    | SNP | 0.109 | 41  | 5  |
| --             | chr8 | 135351527 | C     | A   | -- | -- | IGR    | SNP | 0.122 | 79  | 11 |
| --             | chr8 | 135405923 | C     | G   | -- | -- | IGR    | SNP | 0.705 | 26  | 62 |
| <i>ZFAT</i>    | chr8 | 135510103 | G     | A   | -- | -- | Intron | SNP | 0.180 | 82  | 18 |
| <i>ZFAT</i>    | chr8 | 135510378 | G     | T   | -- | -- | Intron | SNP | 0.189 | 30  | 7  |
| <i>ZFAT</i>    | chr8 | 135510426 | G     | C   | -- | -- | Intron | SNP | 0.262 | 31  | 11 |
| <i>ZFAT</i>    | chr8 | 135641702 | C     | T   | -- | -- | Intron | SNP | 0.250 | 96  | 32 |
| --             | chr8 | 135958582 | G     | T   | -- | -- | IGR    | SNP | 0.116 | 107 | 14 |
| --             | chr8 | 136127137 | TC    | -   | -- | -- | IGR    | DEL | 0.126 | 83  | 12 |
| --             | chr8 | 136184502 | C     | T   | -- | -- | IGR    | SNP | 0.142 | 115 | 19 |
| <i>KHDRBS3</i> | chr8 | 136643264 | G     | T   | -- | -- | Intron | SNP | 0.200 | 64  | 16 |
| --             | chr8 | 136687730 | T     | G   | -- | -- | IGR    | SNP | 0.250 | 93  | 31 |
| --             | chr8 | 136725614 | A     | T   | -- | -- | IGR    | SNP | 0.254 | 103 | 35 |
| --             | chr8 | 136783985 | T     | C   | -- | -- | IGR    | SNP | 0.104 | 69  | 8  |
| --             | chr8 | 136783992 | C     | T   | -- | -- | IGR    | SNP | 0.114 | 70  | 9  |
| --             | chr8 | 136948582 | G     | A   | -- | -- | IGR    | SNP | 0.250 | 93  | 31 |
| --             | chr8 | 137091495 | T     | A   | -- | -- | IGR    | SNP | 0.113 | 142 | 18 |

|          |      |           |           |   |                        |                 |         |       |       |     |     |
|----------|------|-----------|-----------|---|------------------------|-----------------|---------|-------|-------|-----|-----|
| --       | chr8 | 137214818 | C         | T | --                     | --              | IGR     | SNP   | 0.310 | 69  | 31  |
| --       | chr8 | 137417191 | C         | T | --                     | --              | IGR     | SNP   | 0.692 | 24  | 54  |
| --       | chr8 | 137512060 | C         | A | --                     | --              | IGR     | SNP   | 0.176 | 56  | 12  |
| --       | chr8 | 137558305 | C         | A | --                     | --              | IGR     | SNP   | 0.323 | 63  | 30  |
| --       | chr8 | 137569596 | G         | C | --                     | --              | IGR     | SNP   | 0.314 | 72  | 33  |
| --       | chr8 | 137569603 | T         | A | --                     | --              | IGR     | SNP   | 0.311 | 73  | 33  |
| --       | chr8 | 137609165 | C         | T | --                     | --              | IGR     | SNP   | 0.167 | 20  | 4   |
| --       | chr8 | 137786093 | A         | T | --                     | --              | IGR     | SNP   | 0.215 | 84  | 23  |
| --       | chr8 | 137896318 | C         | A | --                     | --              | IGR     | SNP   | 0.135 | 64  | 10  |
| --       | chr8 | 137896319 | T         | A | --                     | --              | IGR     | SNP   | 0.135 | 64  | 10  |
| --       | chr8 | 137948552 | G         | T | --                     | --              | IGR     | SNP   | 0.104 | 95  | 11  |
| --       | chr8 | 138057641 | G         | T | --                     | --              | IGR     | SNP   | 0.352 | 57  | 31  |
| --       | chr8 | 138106243 | T         | A | --                     | --              | IGR     | SNP   | 0.139 | 62  | 10  |
| --       | chr8 | 138154404 | C         | A | --                     | --              | IGR     | SNP   | 0.198 | 65  | 16  |
| --       | chr8 | 138190356 | G         | C | --                     | --              | IGR     | SNP   | 0.290 | 93  | 38  |
| --       | chr8 | 138231648 | C         | T | --                     | --              | IGR     | SNP   | 0.200 | 96  | 24  |
| --       | chr8 | 138545554 | C         | A | --                     | --              | IGR     | SNP   | 0.346 | 68  | 36  |
| --       | chr8 | 138597867 | A         | C | --                     | --              | IGR     | SNP   | 0.327 | 70  | 34  |
| --       | chr8 | 138937381 | A         | G | --                     | --              | IGR     | SNP   | 0.272 | 59  | 22  |
| --       | chr8 | 138983805 | C         | A | --                     | --              | IGR     | SNP   | 0.218 | 93  | 26  |
| --       | chr8 | 139104033 | A         | C | --                     | --              | IGR     | SNP   | 0.122 | 79  | 11  |
| FAM135B  | chr8 | 139149305 | T         | G | --                     | --              | Intron  | SNP   | 0.261 | 88  | 31  |
| FAM135B  | chr8 | 139240388 | T         | G | --                     | --              | Intron  | SNP   | 0.382 | 76  | 47  |
| FAM135B  | chr8 | 139242717 | G         | T | --                     | --              | Intron  | SNP   | 0.115 | 92  | 12  |
| FAM135B  | chr8 | 139280117 | C         | T | --                     | --              | Intron  | SNP   | 0.140 | 98  | 16  |
| FAM135B  | chr8 | 139293733 | T         | A | --                     | --              | Intron  | SNP   | 0.234 | 49  | 15  |
| FAM135B  | chr8 | 139442774 | T         | C | --                     | --              | Intron  | SNP   | 0.383 | 74  | 46  |
| FAM135B  | chr8 | 139443767 | T         | A | --                     | --              | Intron  | SNP   | 0.320 | 87  | 41  |
| COL22A1  | chr8 | 139647191 | A         | A | --                     | --              | Intron  | SNP   | 0.239 | 102 | 32  |
| COL22A1  | chr8 | 139690037 | G         | T | --                     | --              | Intron  | SNP   | 0.252 | 107 | 36  |
| COL22A1  | chr8 | 139726073 | G         | C | --                     | --              | Intron  | SNP   | 0.245 | 77  | 25  |
| COL22A1  | chr8 | 139739037 | G         | A | --                     | --              | Intron  | SNP   | 0.289 | 118 | 48  |
| COL22A1  | chr8 | 139852137 | G         | A | --                     | --              | Intron  | SNP   | 0.316 | 67  | 31  |
| COL22A1  | chr8 | 139904666 | G         | T | --                     | --              | Intron  | SNP   | 0.298 | 73  | 31  |
| --       | chr8 | 140012345 | A         | G | --                     | --              | IGR     | SNP   | 0.144 | 107 | 18  |
| --       | chr8 | 140228252 | G         | A | --                     | --              | IGR     | SNP   | 0.184 | 120 | 27  |
| --       | chr8 | 140228607 | A         | T | --                     | --              | IGR     | SNP   | 0.119 | 111 | 15  |
| --       | chr8 | 140482644 | C         | T | --                     | --              | IGR     | SNP   | 0.329 | 96  | 47  |
| --       | chr8 | 140609071 | C         | A | --                     | --              | IGR     | SNP   | 0.330 | 63  | 31  |
| KCNK9    | chr8 | 140692872 | C         | T | --                     | --              | Intron  | SNP   | 0.685 | 46  | 100 |
| DENND3   | chr8 | 142157104 | C         | T | --                     | --              | Intron  | SNP   | 0.135 | 141 | 22  |
| FLJ43860 | chr8 | 142463093 | A         | G | --                     | --              | Intron  | SNP   | 0.110 | 113 | 14  |
| FLJ43860 | chr8 | 142472417 | TGACA     | - | --                     | --              | Intron  | DEL   | 0.293 | 70  | 29  |
| --       | chr8 | 142528398 | C         | A | --                     | --              | IGR     | SNP   | 0.718 | 20  | 51  |
| --       | chr8 | 142683670 | C         | T | --                     | --              | IGR     | SNP   | 0.144 | 95  | 16  |
| --       | chr8 | 142958119 | T         | C | --                     | --              | IGR     | SNP   | 0.308 | 9   | 4   |
| --       | chr8 | 143057624 | G         | A | --                     | --              | IGR     | SNP   | 0.267 | 74  | 27  |
| --       | chr8 | 143166879 | AAAGGAAGG | - | --                     | --              | IGR     | DEL   | 0.125 | 21  | 3   |
| --       | chr8 | 143232176 | G         | A | --                     | --              | IGR     | SNP   | 0.110 | 187 | 23  |
| TSNARE1  | chr8 | 143333339 | G         | A | --                     | --              | Intron  | SNP   | 0.200 | 48  | 12  |
| TSNARE1  | chr8 | 143435837 | G         | A | --                     | --              | Intron  | SNP   | 0.252 | 95  | 32  |
| TSNARE1  | chr8 | 143471791 | A         | G | --                     | --              | Intron  | SNP   | 0.126 | 76  | 11  |
| --       | chr8 | 143503865 | G         | C | --                     | --              | IGR     | SNP   | 0.364 | 63  | 36  |
| --       | chr8 | 143663072 | G         | A | --                     | --              | IGR     | SNP   | 0.369 | 82  | 48  |
| LYPD2    | chr8 | 143831361 | T         | C | --                     | --              | 3'Flank | SNP   | 0.301 | 146 | 63  |
| --       | chr8 | 143841426 | C         | G | --                     | --              | IGR     | SNP   | 0.138 | 75  | 12  |
| --       | chr8 | 143841562 | G         | A | --                     | --              | IGR     | SNP   | 0.300 | 14  | 6   |
| --       | chr8 | 143841577 | T         | C | --                     | --              | IGR     | SNP   | 0.294 | 12  | 5   |
| LYNX1    | chr8 | 143846613 | C         | A | --                     | --              | Intron  | SNP   | 0.641 | 69  | 123 |
| --       | chr8 | 144015082 | C         | G | --                     | --              | IGR     | SNP   | 0.162 | 88  | 17  |
| --       | chr8 | 144166856 | C         | T | --                     | --              | IGR     | SNP   | 0.323 | 90  | 43  |
| --       | chr8 | 144232689 | C         | A | --                     | --              | IGR     | SNP   | 0.317 | 125 | 58  |
| --       | chr8 | 144249198 | A         | G | --                     | --              | IGR     | SNP   | 0.211 | 45  | 12  |
| --       | chr8 | 144275995 | G         | T | --                     | --              | IGR     | SNP   | 0.184 | 62  | 14  |
| RHPN1    | chr8 | 144465244 | C         | T | --                     | --              | 3'UTR   | SNP   | 0.318 | 144 | 67  |
| --       | chr8 | 144490168 | A         | C | --                     | --              | IGR     | SNP   | 0.145 | 53  | 9   |
| ZC3H3    | chr8 | 144569897 | T         | C | --                     | --              | Intron  | SNP   | 0.125 | 35  | 5   |
| --       | chr8 | 144712221 | C         | A | --                     | --              | IGR     | SNP   | 0.100 | 81  | 9   |
| --       | chr8 | 144839484 | A         | T | --                     | --              | IGR     | SNP   | 0.139 | 68  | 11  |
| --       | chr8 | 144964559 | A         | G | --                     | --              | IGR     | SNP   | 0.116 | 167 | 22  |
| PLEC     | chr8 | 145007119 | C         | T | G1591A,G157D531N,D527N | Missense_mutati | SNP     | 0.230 | 177   | 53  |     |
| PLEC     | chr8 | 145046953 | G         | A | --                     | --              | Intron  | SNP   | 0.296 | 114 | 48  |
| ADCK5    | chr8 | 145604411 | G         | A | --                     | --              | Intron  | SNP   | 0.333 | 12  | 6   |
| ADCK5    | chr8 | 145606815 | A         | C | --                     | --              | Intron  | SNP   | 0.192 | 59  | 14  |
| CPSF1    | chr8 | 145631706 | C         | T | --                     | --              | Intron  | SNP   | 0.248 | 109 | 36  |
| --       | chr8 | 145654111 | T         | G | --                     | --              | IGR     | SNP   | 0.295 | 43  | 18  |
| RECQL4   | chr8 | 145739232 | G         | T | --                     | --              | Intron  | SNP   | 0.101 | 62  | 7   |
| C8orf82  | chr8 | 145754387 | C         | A | --                     | --              | 5'UTR   | SNP   | 0.790 | 21  | 79  |
| C8orf82  | chr8 | 145754393 | C         | A | --                     | --              | 5'UTR   | SNP   | 0.779 | 23  | 81  |
| C8orf82  | chr8 | 145754402 | C         | T | --                     | --              | 5'UTR   | SNP   | 0.762 | 25  | 80  |

|          |      |           |      |   |    |    |        |     |       |     |    |
|----------|------|-----------|------|---|----|----|--------|-----|-------|-----|----|
| --       | chr8 | 145754519 | C    | T | -- | -- | IGR    | SNP | 0.771 | 19  | 64 |
| --       | chr8 | 145754532 | C    | T | -- | -- | IGR    | SNP | 0.769 | 18  | 60 |
| ARHGAP39 | chr8 | 145782153 | A    | G | -- | -- | Intron | SNP | 0.265 | 36  | 13 |
| ARHGAP39 | chr8 | 145806060 | A    | C | -- | -- | Intron | SNP | 0.194 | 58  | 14 |
| --       | chr8 | 145912492 | C    | T | -- | -- | IGR    | SNP | 0.111 | 64  | 8  |
| --       | chr8 | 146037826 | C    | G | -- | -- | IGR    | SNP | 0.105 | 170 | 20 |
| --       | chr9 | 47814     | T    | C | -- | -- | IGR    | SNP | 0.162 | 31  | 6  |
| --       | chr9 | 119965    | A    | G | -- | -- | IGR    | SNP | 0.286 | 10  | 4  |
| CBWD1    | chr9 | 156627    | A    | G | -- | -- | Intron | SNP | 0.182 | 18  | 4  |
| KANK1    | chr9 | 509217    | C    | T | -- | -- | Intron | SNP | 0.194 | 25  | 6  |
| --       | chr9 | 759940    | G    | C | -- | -- | IGR    | SNP | 0.788 | 7   | 26 |
| --       | chr9 | 1179804   | A    | T | -- | -- | IGR    | SNP | 0.200 | 20  | 5  |
| --       | chr9 | 1349942   | G    | A | -- | -- | IGR    | SNP | 0.829 | 7   | 34 |
| --       | chr9 | 1570075   | A    | G | -- | -- | IGR    | SNP | 0.188 | 13  | 3  |
| --       | chr9 | 1902251   | T    | A | -- | -- | IGR    | SNP | 0.971 | 1   | 33 |
| --       | chr9 | 1985387   | G    | T | -- | -- | IGR    | SNP | 0.444 | 5   | 4  |
| RFX3     | chr9 | 3348817   | C    | A | -- | -- | Intron | SNP | 0.367 | 19  | 11 |
| RFX3     | chr9 | 3348818   | T    | C | -- | -- | Intron | SNP | 0.345 | 19  | 10 |
| RFX3     | chr9 | 3401120   | G    | C | -- | -- | Intron | SNP | 0.878 | 5   | 36 |
| --       | chr9 | 3603592   | G    | A | -- | -- | IGR    | SNP | 0.364 | 21  | 12 |
| --       | chr9 | 4447991   | G    | T | -- | -- | IGR    | SNP | 0.174 | 19  | 4  |
| AK3      | chr9 | 4721359   | C    | G | -- | -- | Intron | SNP | 0.923 | 2   | 24 |
| --       | chr9 | 5288458   | C    | A | -- | -- | IGR    | SNP | 0.808 | 5   | 21 |
| C9orf46  | chr9 | 5359079   | TTTG | - | -- | -- | Intron | DEL | 0.133 | 13  | 2  |
| C9orf46  | chr9 | 5433647   | C    | T | -- | -- | Intron | SNP | 0.171 | 29  | 6  |
| ERMP1    | chr9 | 5806949   | G    | A | -- | -- | Intron | SNP | 0.966 | 1   | 28 |
| MLANA    | chr9 | 5908017   | T    | A | -- | -- | Intron | SNP | 0.438 | 9   | 7  |
| --       | chr9 | 6182298   | C    | G | -- | -- | IGR    | SNP | 0.273 | 8   | 3  |
| --       | chr9 | 6182316   | C    | T | -- | -- | IGR    | SNP | 0.333 | 6   | 3  |
| --       | chr9 | 6285957   | T    | A | -- | -- | IGR    | SNP | 0.364 | 14  | 8  |
| --       | chr9 | 6340265   | A    | G | -- | -- | IGR    | SNP | 0.158 | 16  | 3  |
| UHRF2    | chr9 | 6492855   | A    | T | -- | -- | Intron | SNP | 0.250 | 9   | 3  |
| KDM4C    | chr9 | 6747036   | G    | A | -- | -- | Intron | SNP | 0.222 | 14  | 4  |
| KDM4C    | chr9 | 6798727   | C    | G | -- | -- | Intron | SNP | 0.308 | 9   | 4  |
| KDM4C    | chr9 | 6798734   | C    | T | -- | -- | Intron | SNP | 0.267 | 11  | 4  |
| KDM4C    | chr9 | 6799642   | C    | T | -- | -- | Intron | SNP | 0.417 | 7   | 5  |
| KDM4C    | chr9 | 7122269   | T    | A | -- | -- | Intron | SNP | 0.150 | 17  | 3  |
| --       | chr9 | 7734928   | T    | G | -- | -- | IGR    | SNP | 0.419 | 18  | 13 |
| --       | chr9 | 7751658   | A    | C | -- | -- | IGR    | SNP | 0.333 | 8   | 4  |
| --       | chr9 | 8308988   | G    | T | -- | -- | IGR    | SNP | 0.240 | 19  | 6  |
| PTPRD    | chr9 | 8327357   | TTA  | - | -- | -- | Intron | DEL | 0.167 | 25  | 5  |
| PTPRD    | chr9 | 8337625   | A    | T | -- | -- | Intron | SNP | 0.208 | 19  | 5  |
| PTPRD    | chr9 | 8551820   | C    | A | -- | -- | Intron | SNP | 0.313 | 22  | 10 |
| PTPRD    | chr9 | 8636478   | T    | A | -- | -- | Intron | SNP | 0.265 | 25  | 9  |
| PTPRD    | chr9 | 9095742   | C    | T | -- | -- | Intron | SNP | 0.129 | 27  | 4  |
| PTPRD    | chr9 | 9127933   | A    | C | -- | -- | Intron | SNP | 0.227 | 17  | 5  |
| PTPRD    | chr9 | 9127934   | G    | T | -- | -- | Intron | SNP | 0.261 | 17  | 6  |
| PTPRD    | chr9 | 9145862   | C    | G | -- | -- | Intron | SNP | 0.184 | 31  | 7  |
| PTPRD    | chr9 | 9175628   | A    | C | -- | -- | Intron | SNP | 0.333 | 8   | 4  |
| PTPRD    | chr9 | 9249134   | G    | C | -- | -- | Intron | SNP | 0.680 | 8   | 17 |
| PTPRD    | chr9 | 9276136   | G    | T | -- | -- | Intron | SNP | 0.813 | 3   | 13 |
| PTPRD    | chr9 | 9375876   | C    | T | -- | -- | Intron | SNP | 0.778 | 6   | 21 |
| PTPRD    | chr9 | 9408587   | A    | T | -- | -- | Intron | SNP | 0.375 | 15  | 9  |
| PTPRD    | chr9 | 9565413   | T    | C | -- | -- | Intron | SNP | 0.800 | 4   | 16 |
| PTPRD    | chr9 | 9626587   | G    | A | -- | -- | Intron | SNP | 0.944 | 1   | 17 |
| PTPRD    | chr9 | 9730615   | T    | A | -- | -- | Intron | SNP | 0.917 | 2   | 22 |
| PTPRD    | chr9 | 9757193   | C    | T | -- | -- | Intron | SNP | 0.286 | 20  | 8  |
| PTPRD    | chr9 | 9845331   | A    | G | -- | -- | Intron | SNP | 0.286 | 10  | 4  |
| PTPRD    | chr9 | 9891295   | A    | G | -- | -- | Intron | SNP | 0.458 | 13  | 11 |
| PTPRD    | chr9 | 9962813   | G    | A | -- | -- | Intron | SNP | 0.242 | 25  | 8  |
| PTPRD    | chr9 | 10105637  | G    | A | -- | -- | Intron | SNP | 0.174 | 19  | 4  |
| PTPRD    | chr9 | 10133094  | A    | T | -- | -- | Intron | SNP | 0.396 | 29  | 19 |
| PTPRD    | chr9 | 10133095  | G    | T | -- | -- | Intron | SNP | 0.404 | 28  | 19 |
| PTPRD    | chr9 | 10385487  | AT   | - | -- | -- | Intron | DEL | 0.760 | 6   | 19 |
| --       | chr9 | 10835325  | G    | T | -- | -- | IGR    | SNP | 0.346 | 17  | 9  |
| --       | chr9 | 10911223  | G    | T | -- | -- | IGR    | SNP | 0.118 | 30  | 4  |
| --       | chr9 | 11073108  | C    | T | -- | -- | IGR    | SNP | 0.273 | 8   | 3  |
| --       | chr9 | 11073113  | C    | T | -- | -- | IGR    | SNP | 0.333 | 8   | 4  |
| --       | chr9 | 11396017  | G    | T | -- | -- | IGR    | SNP | 0.871 | 4   | 27 |
| --       | chr9 | 11536491  | T    | A | -- | -- | IGR    | SNP | 0.474 | 10  | 9  |
| --       | chr9 | 11735803  | G    | C | -- | -- | IGR    | SNP | 0.828 | 5   | 24 |
| --       | chr9 | 11874661  | G    | T | -- | -- | IGR    | SNP | 0.900 | 2   | 18 |
| --       | chr9 | 11933178  | C    | T | -- | -- | IGR    | SNP | 0.368 | 12  | 7  |
| --       | chr9 | 12366897  | C    | G | -- | -- | IGR    | SNP | 0.152 | 39  | 7  |
| --       | chr9 | 12884296  | T    | A | -- | -- | IGR    | SNP | 0.294 | 12  | 5  |
| --       | chr9 | 12950945  | T    | G | -- | -- | IGR    | SNP | 0.103 | 35  | 4  |
| --       | chr9 | 13038442  | A    | C | -- | -- | IGR    | SNP | 0.143 | 18  | 3  |
| --       | chr9 | 13102368  | A    | G | -- | -- | IGR    | SNP | 0.967 | 1   | 29 |
| MPDZ     | chr9 | 13164867  | A    | G | -- | -- | Intron | SNP | 0.872 | 5   | 34 |
| MPDZ     | chr9 | 13193347  | T    | A | -- | -- | Intron | SNP | 0.967 | 1   | 29 |

|          |      |          |     |     |    |    |        |     |       |    |    |
|----------|------|----------|-----|-----|----|----|--------|-----|-------|----|----|
| FLJ41200 | chr9 | 13418656 | C   | T   | -- | -- | RNA    | SNP | 0.861 | 5  | 31 |
| --       | chr9 | 13446828 | A   | C   | -- | -- | IGR    | SNP | 0.423 | 15 | 11 |
| --       | chr9 | 13473156 | T   | C   | -- | -- | IGR    | SNP | 0.818 | 6  | 27 |
| --       | chr9 | 13633116 | C   | T   | -- | -- | IGR    | SNP | 0.273 | 40 | 15 |
| --       | chr9 | 14037805 | GT  | -   | -- | -- | IGR    | DEL | 0.813 | 9  | 39 |
| FREM1    | chr9 | 14806005 | G   | A   | -- | -- | Intron | SNP | 0.880 | 3  | 22 |
| --       | chr9 | 14956712 | A   | T   | -- | -- | IGR    | SNP | 0.132 | 33 | 5  |
| --       | chr9 | 15121934 | G   | T   | -- | -- | IGR    | SNP | 0.286 | 25 | 10 |
| TTC39B   | chr9 | 15293930 | C   | T   | -- | -- | Intron | SNP | 0.769 | 9  | 30 |
| C9orf93  | chr9 | 15628655 | -   | GA  | -- | -- | Intron | INS | 0.160 | 21 | 4  |
| C9orf93  | chr9 | 15628669 | G   | C   | -- | -- | Intron | SNP | 0.143 | 24 | 4  |
| C9orf93  | chr9 | 15628675 | C   | T   | -- | -- | Intron | SNP | 0.138 | 25 | 4  |
| C9orf93  | chr9 | 15628861 | A   | C   | -- | -- | Intron | SNP | 0.200 | 16 | 4  |
| --       | chr9 | 16229939 | G   | T   | -- | -- | IGR    | SNP | 0.278 | 13 | 5  |
| BNC2     | chr9 | 16528092 | G   | T   | -- | -- | Intron | SNP | 0.484 | 16 | 15 |
| --       | chr9 | 16877021 | A   | C   | -- | -- | IGR    | SNP | 0.167 | 15 | 3  |
| --       | chr9 | 16978013 | C   | T   | -- | -- | IGR    | SNP | 0.375 | 5  | 3  |
| --       | chr9 | 16978057 | G   | C   | -- | -- | IGR    | SNP | 0.444 | 5  | 4  |
| CNTLN    | chr9 | 17446129 | C   | T   | -- | -- | Intron | SNP | 0.444 | 5  | 4  |
| --       | chr9 | 17542379 | C   | G   | -- | -- | IGR    | SNP | 0.500 | 2  | 2  |
| SH3GL2   | chr9 | 17686463 | T   | G   | -- | -- | Intron | SNP | 0.462 | 7  | 6  |
| ADAMTSL1 | chr9 | 18644507 | G   | T   | -- | -- | Intron | SNP | 0.500 | 3  | 3  |
| ADAMTSL1 | chr9 | 18687036 | G   | C   | -- | -- | Intron | SNP | 0.727 | 6  | 16 |
| HAUS6    | chr9 | 19097786 | C   | A   | -- | -- | Intron | SNP | 0.167 | 25 | 5  |
| PLIN2    | chr9 | 19126806 | G   | T   | -- | -- | Intron | SNP | 0.810 | 4  | 17 |
| PLIN2    | chr9 | 19127250 | G   | C   | -- | -- | Intron | SNP | 0.933 | 3  | 42 |
| --       | chr9 | 19817621 | C   | G   | -- | -- | IGR    | SNP | 0.462 | 14 | 12 |
| --       | chr9 | 20638499 | G   | A   | -- | -- | IGR    | SNP | 0.850 | 3  | 17 |
| PTPLAD2  | chr9 | 21016323 | C   | A   | -- | -- | Intron | SNP | 0.500 | 18 | 18 |
| --       | chr9 | 21190839 | T   | A   | -- | -- | IGR    | SNP | 0.278 | 13 | 5  |
| --       | chr9 | 21654069 | G   | T   | -- | -- | IGR    | SNP | 0.231 | 10 | 3  |
| --       | chr9 | 23014845 | T   | A   | -- | -- | IGR    | SNP | 0.429 | 4  | 3  |
| --       | chr9 | 24339217 | C   | A   | -- | -- | IGR    | SNP | 0.500 | 2  | 2  |
| --       | chr9 | 24339237 | G   | C   | -- | -- | IGR    | SNP | 0.500 | 2  | 2  |
| --       | chr9 | 24918874 | C   | A   | -- | -- | IGR    | SNP | 0.400 | 3  | 2  |
| --       | chr9 | 25600787 | -   | GTA | -- | -- | IGR    | INS | 0.105 | 17 | 2  |
| --       | chr9 | 26010141 | C   | A   | -- | -- | IGR    | SNP | 0.609 | 9  | 14 |
| --       | chr9 | 26399243 | G   | A   | -- | -- | IGR    | SNP | 0.947 | 2  | 36 |
| --       | chr9 | 26721931 | G   | C   | -- | -- | IGR    | SNP | 0.800 | 6  | 24 |
| TEK      | chr9 | 27205789 | T   | C   | -- | -- | Intron | SNP | 0.889 | 3  | 24 |
| C9orf72  | chr9 | 27559263 | G   | T   | -- | -- | Intron | SNP | 0.174 | 19 | 4  |
| --       | chr9 | 27643798 | -   | TTA | -- | -- | IGR    | INS | 0.421 | 11 | 8  |
| --       | chr9 | 27830405 | A   | T   | -- | -- | IGR    | SNP | 0.333 | 14 | 7  |
| --       | chr9 | 27889422 | T   | A   | -- | -- | IGR    | SNP | 0.533 | 14 | 16 |
| LINGO2   | chr9 | 28244332 | A   | T   | -- | -- | Intron | SNP | 0.281 | 23 | 9  |
| LINGO2   | chr9 | 28277493 | C   | G   | -- | -- | Intron | SNP | 0.324 | 23 | 11 |
| LINGO2   | chr9 | 28514934 | A   | T   | -- | -- | Intron | SNP | 0.800 | 5  | 20 |
| LINGO2   | chr9 | 28592373 | G   | A   | -- | -- | Intron | SNP | 0.250 | 18 | 6  |
| --       | chr9 | 28880614 | G   | A   | -- | -- | IGR    | SNP | 0.882 | 4  | 30 |
| --       | chr9 | 29111935 | -   | AC  | -- | -- | IGR    | INS | 0.158 | 16 | 3  |
| --       | chr9 | 29123548 | G   | T   | -- | -- | IGR    | SNP | 0.115 | 23 | 3  |
| --       | chr9 | 29123549 | A   | T   | -- | -- | IGR    | SNP | 0.111 | 24 | 3  |
| --       | chr9 | 29183681 | AT  | -   | -- | -- | IGR    | DEL | 0.677 | 10 | 21 |
| --       | chr9 | 29193359 | T   | G   | -- | -- | IGR    | SNP | 0.227 | 17 | 5  |
| --       | chr9 | 29326714 | G   | T   | -- | -- | IGR    | SNP | 0.250 | 12 | 4  |
| --       | chr9 | 29326715 | A   | T   | -- | -- | IGR    | SNP | 0.267 | 11 | 4  |
| --       | chr9 | 29443946 | A   | G   | -- | -- | IGR    | SNP | 0.440 | 14 | 11 |
| --       | chr9 | 29557141 | C   | A   | -- | -- | IGR    | SNP | 0.885 | 3  | 23 |
| --       | chr9 | 30251430 | G   | T   | -- | -- | IGR    | SNP | 0.433 | 17 | 13 |
| --       | chr9 | 30903378 | T   | C   | -- | -- | IGR    | SNP | 0.571 | 15 | 20 |
| --       | chr9 | 31376047 | A   | G   | -- | -- | IGR    | SNP | 0.444 | 5  | 4  |
| --       | chr9 | 31490533 | A   | G   | -- | -- | IGR    | SNP | 0.200 | 20 | 5  |
| --       | chr9 | 32015925 | G   | A   | -- | -- | IGR    | SNP | 0.486 | 19 | 18 |
| --       | chr9 | 32139012 | C   | T   | -- | -- | IGR    | SNP | 0.385 | 16 | 10 |
| --       | chr9 | 32154012 | C   | T   | -- | -- | IGR    | SNP | 0.333 | 4  | 2  |
| --       | chr9 | 32154019 | T   | A   | -- | -- | IGR    | SNP | 0.333 | 4  | 2  |
| --       | chr9 | 32347208 | C   | T   | -- | -- | IGR    | SNP | 0.250 | 30 | 10 |
| NDUFB6   | chr9 | 32561103 | G   | T   | -- | -- | Intron | SNP | 0.857 | 5  | 30 |
| NDUFB6   | chr9 | 32561169 | G   | C   | -- | -- | Intron | SNP | 0.759 | 7  | 22 |
| --       | chr9 | 32775573 | T   | C   | -- | -- | IGR    | SNP | 0.870 | 3  | 20 |
| --       | chr9 | 32812434 | G   | A   | -- | -- | IGR    | SNP | 0.375 | 10 | 6  |
| --       | chr9 | 32814816 | A   | G   | -- | -- | IGR    | SNP | 0.429 | 12 | 9  |
| --       | chr9 | 32892393 | ATG | -   | -- | -- | IGR    | DEL | 0.143 | 12 | 2  |
| --       | chr9 | 33108527 | G   | A   | -- | -- | IGR    | SNP | 0.837 | 8  | 41 |
| B4GALT1  | chr9 | 33150558 | G   | C   | -- | -- | Intron | SNP | 0.833 | 5  | 25 |
| --       | chr9 | 33215356 | G   | C   | -- | -- | IGR    | SNP | 0.821 | 5  | 23 |
| --       | chr9 | 33574655 | G   | A   | -- | -- | IGR    | SNP | 0.778 | 8  | 28 |
| --       | chr9 | 33575099 | G   | A   | -- | -- | IGR    | SNP | 0.750 | 6  | 18 |
| --       | chr9 | 33596502 | A   | C   | -- | -- | IGR    | SNP | 0.200 | 12 | 3  |
| UBAP2    | chr9 | 34023237 | G   | A   | -- | -- | Intron | SNP | 0.211 | 15 | 4  |

|                  |      |          |        |      |        |        |         |     |       |    |    |
|------------------|------|----------|--------|------|--------|--------|---------|-----|-------|----|----|
| <i>DCAF12</i>    | chr9 | 34094453 | G      | A    | --     | --     | Intron  | SNP | 0.852 | 4  | 23 |
| <i>KIF24</i>     | chr9 | 34301995 | C      | T    | --     | --     | Intron  | SNP | 0.385 | 8  | 5  |
| <i>KIF24</i>     | chr9 | 34307877 | AAG    | -    | --     | --     | Intron  | DEL | 0.111 | 16 | 2  |
| <i>DNAI1</i>     | chr9 | 34482417 | T      | C    | --     | --     | Intron  | SNP | 0.214 | 11 | 3  |
| <i>LOC415056</i> | chr9 | 34573381 | G      | T    | --     | --     | RNA     | SNP | 0.394 | 20 | 13 |
| --               | chr9 | 34761910 | C      | T    | --     | --     | IGR     | SNP | 0.107 | 25 | 3  |
| --               | chr9 | 34766897 | C      | T    | --     | --     | IGR     | SNP | 0.211 | 15 | 4  |
| --               | chr9 | 34766918 | A      | T    | --     | --     | IGR     | SNP | 0.182 | 18 | 4  |
| --               | chr9 | 35014045 | G      | A    | --     | --     | IGR     | SNP | 0.867 | 4  | 26 |
| --               | chr9 | 35016684 | G      | A    | --     | --     | IGR     | SNP | 0.800 | 5  | 20 |
| <i>UNC13B</i>    | chr9 | 35238281 | G      | C    | --     | --     | Intron  | SNP | 0.536 | 13 | 15 |
| <i>TMEM8B</i>    | chr9 | 35848663 | G      | T    | --     | --     | Intron  | SNP | 0.200 | 20 | 5  |
| --               | chr9 | 35961583 | G      | C    | --     | --     | IGR     | SNP | 0.500 | 11 | 11 |
| <i>RNF38</i>     | chr9 | 36394945 | C      | T    | --     | --     | Intron  | SNP | 0.400 | 15 | 10 |
| --               | chr9 | 36564843 | A      | G    | --     | --     | IGR     | SNP | 0.500 | 11 | 11 |
| --               | chr9 | 36742633 | A      | G    | --     | --     | IGR     | SNP | 0.897 | 3  | 26 |
| --               | chr9 | 36822233 | G      | T    | --     | --     | IGR     | SNP | 0.353 | 33 | 18 |
| <i>PAX5</i>      | chr9 | 36927703 | -      | CTT  | --     | --     | Intron  | INS | 0.118 | 15 | 2  |
| <i>ZCCHC7</i>    | chr9 | 37180914 | A      | C    | --     | --     | Intron  | SNP | 0.316 | 13 | 6  |
| <i>RG9MTD3</i>   | chr9 | 37756750 | -      | CAT  | --     | --     | Intron  | INS | 0.148 | 23 | 4  |
| <i>RG9MTD3</i>   | chr9 | 37766388 | GAT    | -    | --     | --     | Intron  | DEL | 0.118 | 15 | 2  |
| <i>MCART1</i>    | chr9 | 37891588 | C      | T    | --     | --     | Intron  | SNP | 0.500 | 4  | 4  |
| --               | chr9 | 38117009 | A      | C    | --     | --     | IGR     | SNP | 0.364 | 7  | 4  |
| --               | chr9 | 38168804 | T      | C    | --     | --     | IGR     | SNP | 0.500 | 3  | 3  |
| --               | chr9 | 38188469 | T      | G    | --     | --     | IGR     | SNP | 0.875 | 4  | 28 |
| --               | chr9 | 38198161 | A      | T    | --     | --     | IGR     | SNP | 0.471 | 18 | 16 |
| --               | chr9 | 38549677 | A      | G    | --     | --     | IGR     | SNP | 0.115 | 23 | 3  |
| --               | chr9 | 38809582 | G      | A    | --     | --     | IGR     | SNP | 0.429 | 4  | 3  |
| --               | chr9 | 39040320 | -      | TATC | --     | --     | IGR     | INS | 0.167 | 20 | 4  |
| <i>CNTNAP3</i>   | chr9 | 39078862 | G      | T    | C3498A | G1166G | Silent  | SNP | 0.238 | 16 | 5  |
| <i>CNTNAP3</i>   | chr9 | 39120389 | TA     | -    | --     | --     | Intron  | DEL | 0.176 | 14 | 3  |
| --               | chr9 | 39810153 | C      | T    | --     | --     | IGR     | SNP | 0.122 | 36 | 5  |
| --               | chr9 | 39810157 | G      | A    | --     | --     | IGR     | SNP | 0.122 | 36 | 5  |
| --               | chr9 | 40652331 | C      | G    | --     | --     | IGR     | SNP | 0.929 | 1  | 13 |
| --               | chr9 | 41089156 | T      | C    | --     | --     | IGR     | SNP | 0.667 | 1  | 2  |
| --               | chr9 | 41900609 | A      | G    | --     | --     | IGR     | SNP | 0.133 | 26 | 4  |
| --               | chr9 | 42178397 | A      | G    | --     | --     | IGR     | SNP | 0.280 | 18 | 7  |
| --               | chr9 | 42182138 | T      | C    | --     | --     | IGR     | SNP | 0.241 | 22 | 7  |
| --               | chr9 | 42206949 | C      | T    | --     | --     | IGR     | SNP | 0.400 | 9  | 6  |
| --               | chr9 | 42255901 | C      | A    | --     | --     | IGR     | SNP | 0.208 | 19 | 5  |
| --               | chr9 | 42255941 | AACAAC | -    | --     | --     | IGR     | DEL | 0.172 | 24 | 5  |
| --               | chr9 | 42268860 | G      | A    | --     | --     | IGR     | SNP | 0.108 | 33 | 4  |
| --               | chr9 | 42269578 | TC     | -    | --     | --     | IGR     | DEL | 0.143 | 12 | 2  |
| --               | chr9 | 42427114 | -      | CTT  | --     | --     | IGR     | INS | 0.136 | 19 | 3  |
| <i>FAM95B1</i>   | chr9 | 42467910 | C      | G    | --     | --     | 5'Flank | SNP | 0.107 | 75 | 9  |
| --               | chr9 | 42490260 | T      | C    | --     | --     | IGR     | SNP | 0.500 | 5  | 5  |
| --               | chr9 | 42600609 | T      | C    | --     | --     | IGR     | SNP | 0.294 | 12 | 5  |
| --               | chr9 | 43394868 | TTA    | -    | --     | --     | IGR     | DEL | 0.118 | 15 | 2  |
| --               | chr9 | 43519684 | A      | G    | --     | --     | IGR     | SNP | 0.833 | 1  | 5  |
| --               | chr9 | 43548994 | C      | T    | --     | --     | IGR     | SNP | 0.636 | 4  | 7  |
| --               | chr9 | 43581953 | A      | G    | --     | --     | IGR     | SNP | 0.600 | 2  | 3  |
| <i>CNTNAP3B</i>  | chr9 | 43852585 | G      | C    | --     | --     | Intron  | SNP | 0.259 | 20 | 7  |
| <i>CNTNAP3B</i>  | chr9 | 43852646 | A      | G    | --     | --     | Intron  | SNP | 0.333 | 16 | 8  |
| --               | chr9 | 44071559 | C      | T    | --     | --     | IGR     | SNP | 0.308 | 9  | 4  |
| --               | chr9 | 44076924 | G      | A    | --     | --     | IGR     | SNP | 0.152 | 39 | 7  |
| --               | chr9 | 44080253 | T      | C    | --     | --     | IGR     | SNP | 0.727 | 3  | 8  |
| --               | chr9 | 44087071 | A      | G    | --     | --     | IGR     | SNP | 0.375 | 5  | 3  |
| --               | chr9 | 44087106 | C      | T    | --     | --     | IGR     | SNP | 0.300 | 7  | 3  |
| --               | chr9 | 44103552 | T      | A    | --     | --     | IGR     | SNP | 0.300 | 7  | 3  |
| --               | chr9 | 44124255 | T      | G    | --     | --     | IGR     | SNP | 0.111 | 48 | 6  |
| --               | chr9 | 44166008 | C      | T    | --     | --     | IGR     | SNP | 0.107 | 25 | 3  |
| --               | chr9 | 44166027 | C      | T    | --     | --     | IGR     | SNP | 0.115 | 23 | 3  |
| --               | chr9 | 44176907 | A      | C    | --     | --     | IGR     | SNP | 0.160 | 68 | 13 |
| --               | chr9 | 44207259 | AG     | -    | --     | --     | IGR     | DEL | 0.192 | 21 | 5  |
| --               | chr9 | 44761499 | G      | A    | --     | --     | IGR     | SNP | 0.353 | 11 | 6  |
| --               | chr9 | 44849579 | T      | A    | --     | --     | IGR     | SNP | 0.353 | 11 | 6  |
| --               | chr9 | 44854215 | A      | G    | --     | --     | IGR     | SNP | 0.194 | 25 | 6  |
| --               | chr9 | 44868704 | T      | A    | --     | --     | IGR     | SNP | 0.333 | 10 | 5  |
| --               | chr9 | 44896373 | G      | T    | --     | --     | IGR     | SNP | 0.207 | 23 | 6  |
| --               | chr9 | 45096633 | A      | G    | --     | --     | IGR     | SNP | 0.179 | 23 | 5  |
| --               | chr9 | 45363485 | C      | T    | --     | --     | IGR     | SNP | 0.160 | 21 | 4  |
| --               | chr9 | 45363502 | C      | A    | --     | --     | IGR     | SNP | 0.148 | 23 | 4  |
| --               | chr9 | 45368355 | TTGC   | -    | --     | --     | IGR     | DEL | 0.118 | 15 | 2  |
| --               | chr9 | 45373049 | G      | A    | --     | --     | IGR     | SNP | 0.125 | 28 | 4  |
| --               | chr9 | 45374775 | T      | G    | --     | --     | IGR     | SNP | 0.167 | 25 | 5  |
| --               | chr9 | 45375690 | C      | A    | --     | --     | IGR     | SNP | 0.250 | 27 | 9  |
| --               | chr9 | 45627838 | T      | C    | --     | --     | IGR     | SNP | 0.167 | 20 | 4  |
| --               | chr9 | 45732067 | A      | G    | --     | --     | IGR     | SNP | 0.368 | 12 | 7  |
| --               | chr9 | 46019195 | C      | T    | --     | --     | IGR     | SNP | 0.232 | 43 | 13 |
| --               | chr9 | 46101617 | G      | A    | --     | --     | IGR     | SNP | 0.448 | 16 | 13 |

|             |      |          |       |       |    |    |        |     |       |     |    |
|-------------|------|----------|-------|-------|----|----|--------|-----|-------|-----|----|
| --          | chr9 | 46140323 | C     | T     | -- | -- | IGR    | SNP | 0.125 | 63  | 9  |
| --          | chr9 | 46141564 | T     | A     | -- | -- | IGR    | SNP | 0.207 | 23  | 6  |
| --          | chr9 | 46141919 | G     | T     | -- | -- | IGR    | SNP | 0.308 | 9   | 4  |
| --          | chr9 | 46141935 | G     | A     | -- | -- | IGR    | SNP | 0.294 | 12  | 5  |
| --          | chr9 | 46141941 | C     | T     | -- | -- | IGR    | SNP | 0.227 | 17  | 5  |
| --          | chr9 | 46141993 | C     | T     | -- | -- | IGR    | SNP | 0.185 | 22  | 5  |
| --          | chr9 | 46342206 | T     | C     | -- | -- | IGR    | SNP | 0.219 | 25  | 7  |
| --          | chr9 | 46361474 | C     | T     | -- | -- | IGR    | SNP | 0.115 | 23  | 3  |
| --          | chr9 | 46362965 | C     | T     | -- | -- | IGR    | SNP | 0.250 | 18  | 6  |
| --          | chr9 | 46684127 | A     | G     | -- | -- | IGR    | SNP | 0.179 | 23  | 5  |
| --          | chr9 | 46752446 | T     | G     | -- | -- | IGR    | SNP | 0.214 | 11  | 3  |
| --          | chr9 | 46752733 | T     | A     | -- | -- | IGR    | SNP | 0.263 | 14  | 5  |
| --          | chr9 | 47178372 | C     | T     | -- | -- | IGR    | SNP | 0.129 | 27  | 4  |
| --          | chr9 | 47208888 | -     | ATTAT | -- | -- | IGR    | DEL | 0.136 | 19  | 3  |
| --          | chr9 | 65521538 | -     | TAC   | -- | -- | IGR    | INS | 0.143 | 18  | 3  |
| --          | chr9 | 66255911 | AATAG | -     | -- | -- | IGR    | DEL | 0.200 | 12  | 3  |
| --          | chr9 | 66264254 | A     | T     | -- | -- | IGR    | SNP | 0.227 | 17  | 5  |
| --          | chr9 | 66264255 | T     | G     | -- | -- | IGR    | SNP | 0.227 | 17  | 5  |
| --          | chr9 | 66290511 | C     | G     | -- | -- | IGR    | SNP | 0.111 | 24  | 3  |
| --          | chr9 | 66300462 | A     | G     | -- | -- | IGR    | SNP | 0.318 | 15  | 7  |
| --          | chr9 | 66301863 | C     | T     | -- | -- | IGR    | SNP | 0.810 | 4   | 17 |
| --          | chr9 | 66301949 | A     | G     | -- | -- | IGR    | SNP | 0.227 | 17  | 5  |
| --          | chr9 | 66301980 | A     | G     | -- | -- | IGR    | SNP | 0.300 | 14  | 6  |
| --          | chr9 | 66467314 | T     | G     | -- | -- | IGR    | SNP | 0.181 | 145 | 32 |
| --          | chr9 | 66476850 | A     | T     | -- | -- | IGR    | SNP | 0.146 | 35  | 6  |
| --          | chr9 | 66504838 | C     | G     | -- | -- | IGR    | SNP | 0.690 | 13  | 29 |
| --          | chr9 | 66726434 | C     | T     | -- | -- | IGR    | SNP | 0.167 | 20  | 4  |
| --          | chr9 | 66726443 | C     | T     | -- | -- | IGR    | SNP | 0.182 | 18  | 4  |
| --          | chr9 | 66726813 | -     | CG    | -- | -- | IGR    | INS | 0.133 | 13  | 2  |
| --          | chr9 | 66728081 | A     | T     | -- | -- | IGR    | SNP | 0.148 | 23  | 4  |
| --          | chr9 | 66728092 | C     | T     | -- | -- | IGR    | SNP | 0.182 | 18  | 4  |
| --          | chr9 | 66732895 | G     | A     | -- | -- | IGR    | SNP | 0.304 | 16  | 7  |
| --          | chr9 | 66738844 | T     | C     | -- | -- | IGR    | SNP | 0.192 | 21  | 5  |
| --          | chr9 | 66769678 | C     | T     | -- | -- | IGR    | SNP | 0.160 | 21  | 4  |
| --          | chr9 | 66769694 | G     | A     | -- | -- | IGR    | SNP | 0.182 | 18  | 4  |
| --          | chr9 | 66777985 | A     | G     | -- | -- | IGR    | SNP | 0.143 | 30  | 5  |
| --          | chr9 | 66779237 | T     | G     | -- | -- | IGR    | SNP | 0.235 | 13  | 4  |
| --          | chr9 | 66779238 | A     | C     | -- | -- | IGR    | SNP | 0.235 | 13  | 4  |
| --          | chr9 | 66786053 | G     | A     | -- | -- | IGR    | SNP | 0.216 | 29  | 8  |
| --          | chr9 | 66786056 | C     | A     | -- | -- | IGR    | SNP | 0.225 | 31  | 9  |
| --          | chr9 | 66803096 | C     | A     | -- | -- | IGR    | SNP | 0.189 | 30  | 7  |
| --          | chr9 | 66969503 | A     | G     | -- | -- | IGR    | SNP | 0.357 | 9   | 5  |
| --          | chr9 | 66995728 | T     | G     | -- | -- | IGR    | SNP | 0.667 | 2   | 4  |
| --          | chr9 | 67215588 | G     | A     | -- | -- | IGR    | SNP | 1.000 | 0   | 3  |
| --          | chr9 | 67225310 | A     | T     | -- | -- | IGR    | SNP | 0.192 | 21  | 5  |
| --          | chr9 | 67225463 | -     | ACTGT | -- | -- | IGR    | INS | 0.176 | 14  | 3  |
| --          | chr9 | 67305930 | A     | G     | -- | -- | IGR    | SNP | 0.188 | 13  | 3  |
| --          | chr9 | 67309907 | -     | AAT   | -- | -- | IGR    | INS | 0.143 | 24  | 4  |
| --          | chr9 | 67313224 | -     | TAAA  | -- | -- | IGR    | DEL | 0.133 | 13  | 2  |
| --          | chr9 | 67702408 | G     | A     | -- | -- | IGR    | SNP | 0.241 | 22  | 7  |
| --          | chr9 | 67828713 | T     | C     | -- | -- | IGR    | SNP | 0.458 | 13  | 11 |
| --          | chr9 | 67828714 | G     | A     | -- | -- | IGR    | SNP | 0.458 | 13  | 11 |
| --          | chr9 | 67862958 | T     | C     | -- | -- | IGR    | SNP | 0.429 | 8   | 6  |
| --          | chr9 | 67917819 | C     | T     | -- | -- | IGR    | SNP | 0.152 | 28  | 5  |
| --          | chr9 | 67918860 | G     | A     | -- | -- | IGR    | SNP | 0.167 | 20  | 4  |
| ANKRD20A1,, | chr9 | 67935622 | A     | G     | -- | -- | Intron | SNP | 0.190 | 17  | 4  |
| ANKRD20A1,, | chr9 | 67935623 | G     | A     | -- | -- | Intron | SNP | 0.190 | 17  | 4  |
| --          | chr9 | 68177991 | T     | C     | -- | -- | IGR    | SNP | 0.900 | 2   | 18 |
| --          | chr9 | 68290163 | -     | CT    | -- | -- | IGR    | INS | 0.167 | 15  | 3  |
| --          | chr9 | 68318867 | A     | T     | -- | -- | IGR    | SNP | 0.135 | 32  | 5  |
| --          | chr9 | 68336193 | T     | C     | -- | -- | IGR    | SNP | 0.143 | 30  | 5  |
| --          | chr9 | 68336745 | G     | T     | -- | -- | IGR    | SNP | 0.119 | 37  | 5  |
| --          | chr9 | 68336776 | T     | C     | -- | -- | IGR    | SNP | 0.122 | 36  | 5  |
| --          | chr9 | 68336777 | T     | C     | -- | -- | IGR    | SNP | 0.128 | 34  | 5  |
| --          | chr9 | 68361802 | A     | G     | -- | -- | IGR    | SNP | 0.385 | 8   | 5  |
| --          | chr9 | 68373345 | A     | G     | -- | -- | IGR    | SNP | 0.156 | 27  | 5  |
| --          | chr9 | 68384274 | A     | G     | -- | -- | IGR    | SNP | 0.122 | 43  | 6  |
| --          | chr9 | 68389176 | T     | C     | -- | -- | IGR    | SNP | 0.220 | 39  | 11 |
| --          | chr9 | 68392435 | G     | T     | -- | -- | IGR    | SNP | 0.286 | 35  | 14 |
| --          | chr9 | 68392487 | CAA   | -     | -- | -- | IGR    | DEL | 0.135 | 32  | 5  |
| --          | chr9 | 68393163 | G     | T     | -- | -- | IGR    | SNP | 0.158 | 16  | 3  |
| --          | chr9 | 68399874 | A     | C     | -- | -- | IGR    | SNP | 0.164 | 127 | 25 |
| LOC642236   | chr9 | 68439348 | T     | C     | -- | -- | RNA    | SNP | 0.308 | 9   | 4  |
| LOC642236   | chr9 | 68448130 | C     | T     | -- | -- | RNA    | SNP | 0.188 | 26  | 6  |
| LOC642236   | chr9 | 68448132 | C     | T     | -- | -- | RNA    | SNP | 0.212 | 26  | 7  |
| --          | chr9 | 68460250 | T     | C     | -- | -- | IGR    | SNP | 0.184 | 31  | 7  |
| --          | chr9 | 68468184 | C     | T     | -- | -- | IGR    | SNP | 0.115 | 85  | 11 |
| --          | chr9 | 68478821 | T     | C     | -- | -- | IGR    | SNP | 0.179 | 23  | 5  |
| --          | chr9 | 68479315 | T     | G     | -- | -- | IGR    | SNP | 0.146 | 35  | 6  |
| --          | chr9 | 68509891 | T     | C     | -- | -- | IGR    | SNP | 0.200 | 20  | 5  |



|            |      |          |       |     |    |    |         |     |       |    |    |
|------------|------|----------|-------|-----|----|----|---------|-----|-------|----|----|
| --         | chr9 | 68510143 | C     | T   | -- | -- | IGR     | SNP | 0.182 | 18 | 4  |
| --         | chr9 | 68669514 | G     | A   | -- | -- | IGR     | SNP | 0.295 | 43 | 18 |
| --         | chr9 | 68688618 | C     | G   | -- | -- | IGR     | SNP | 0.143 | 36 | 6  |
| --         | chr9 | 68691232 | C     | T   | -- | -- | IGR     | SNP | 0.241 | 22 | 7  |
| --         | chr9 | 68693617 | C     | A   | -- | -- | IGR     | SNP | 0.104 | 43 | 5  |
| --         | chr9 | 68700342 | T     | C   | -- | -- | IGR     | SNP | 0.104 | 43 | 5  |
| --         | chr9 | 68707916 | T     | A   | -- | -- | IGR     | SNP | 0.121 | 51 | 7  |
| --         | chr9 | 68722002 | G     | A   | -- | -- | IGR     | SNP | 0.150 | 34 | 6  |
| --         | chr9 | 68724936 | C     | T   | -- | -- | IGR     | SNP | 0.500 | 4  | 4  |
| LOC1001323 | chr9 | 68727108 | C     | T   | -- | -- | RNA     | SNP | 0.129 | 27 | 4  |
| LOC1001323 | chr9 | 68732393 | T     | C   | -- | -- | RNA     | SNP | 0.200 | 16 | 4  |
| LOC1001323 | chr9 | 68745205 | C     | T   | -- | -- | RNA     | SNP | 0.135 | 32 | 5  |
| LOC1001323 | chr9 | 68745220 | CAGTT | -   | -- | -- | RNA     | DEL | 0.135 | 32 | 5  |
| --         | chr9 | 68820646 | A     | G   | -- | -- | IGR     | SNP | 0.556 | 8  | 10 |
| --         | chr9 | 68994699 | G     | A   | -- | -- | IGR     | SNP | 0.176 | 14 | 3  |
| --         | chr9 | 69034566 | G     | A   | -- | -- | IGR     | SNP | 0.115 | 69 | 9  |
| --         | chr9 | 69048175 | T     | C   | -- | -- | IGR     | SNP | 0.135 | 32 | 5  |
| --         | chr9 | 69051595 | C     | T   | -- | -- | IGR     | SNP | 0.118 | 60 | 8  |
| --         | chr9 | 69058984 | -     | TC  | -- | -- | IGR     | INS | 0.107 | 50 | 6  |
| PGM5P2     | chr9 | 69081393 | G     | A   | -- | -- | RNA     | SNP | 0.294 | 12 | 5  |
| PGM5P2     | chr9 | 69128462 | A     | G   | -- | -- | RNA     | SNP | 0.200 | 12 | 3  |
| PGM5P2     | chr9 | 69135254 | C     | A   | -- | -- | RNA     | SNP | 0.235 | 13 | 4  |
| LOC440896  | chr9 | 69175781 | G     | T   | -- | -- | RNA     | SNP | 0.172 | 24 | 5  |
| --         | chr9 | 69269441 | G     | T   | -- | -- | IGR     | SNP | 0.333 | 6  | 3  |
| --         | chr9 | 69274659 | A     | G   | -- | -- | IGR     | SNP | 0.412 | 10 | 7  |
| --         | chr9 | 69351413 | G     | A   | -- | -- | IGR     | SNP | 0.292 | 17 | 7  |
| --         | chr9 | 69375958 | A     | G   | -- | -- | IGR     | SNP | 0.444 | 5  | 4  |
| --         | chr9 | 69376988 | G     | C   | -- | -- | IGR     | SNP | 0.268 | 30 | 11 |
| ANKRD20A4  | chr9 | 69382743 | C     | T   | -- | -- | Intron  | SNP | 0.308 | 9  | 4  |
| ANKRD20A4  | chr9 | 69422797 | A     | T   | -- | -- | Intron  | SNP | 0.600 | 2  | 3  |
| --         | chr9 | 69426852 | G     | A   | -- | -- | IGR     | SNP | 0.600 | 6  | 9  |
| --         | chr9 | 69469311 | G     | A   | -- | -- | IGR     | SNP | 0.385 | 16 | 10 |
| --         | chr9 | 69560760 | C     | T   | -- | -- | IGR     | SNP | 0.429 | 4  | 3  |
| --         | chr9 | 69632400 | C     | T   | -- | -- | IGR     | SNP | 0.667 | 3  | 6  |
| --         | chr9 | 69692330 | G     | A   | -- | -- | IGR     | SNP | 0.211 | 15 | 4  |
| --         | chr9 | 69694615 | T     | A   | -- | -- | IGR     | SNP | 0.462 | 7  | 6  |
| --         | chr9 | 69737964 | AGAT  | -   | -- | -- | IGR     | DEL | 0.143 | 36 | 6  |
| --         | chr9 | 69759385 | A     | T   | -- | -- | IGR     | SNP | 0.214 | 22 | 6  |
| --         | chr9 | 69784649 | C     | G   | -- | -- | IGR     | SNP | 0.271 | 35 | 13 |
| --         | chr9 | 69787648 | G     | A   | -- | -- | IGR     | SNP | 0.750 | 1  | 3  |
| --         | chr9 | 69787650 | A     | G   | -- | -- | IGR     | SNP | 0.750 | 1  | 3  |
| --         | chr9 | 69787868 | GT    | -   | -- | -- | IGR     | DEL | 0.118 | 15 | 2  |
| --         | chr9 | 69797647 | T     | C   | -- | -- | IGR     | SNP | 0.278 | 13 | 5  |
| --         | chr9 | 69798351 | -     | AC  | -- | -- | IGR     | INS | 0.143 | 12 | 2  |
| --         | chr9 | 69813546 | -     | CTT | -- | -- | IGR     | INS | 0.158 | 16 | 3  |
| --         | chr9 | 69813572 | GGA   | -   | -- | -- | IGR     | DEL | 0.143 | 12 | 2  |
| --         | chr9 | 69868668 | A     | G   | -- | -- | IGR     | SNP | 0.375 | 5  | 3  |
| --         | chr9 | 69915709 | T     | C   | -- | -- | IGR     | SNP | 0.163 | 41 | 8  |
| --         | chr9 | 69943497 | A     | G   | -- | -- | IGR     | SNP | 0.364 | 14 | 8  |
| --         | chr9 | 69951198 | C     | T   | -- | -- | IGR     | SNP | 0.208 | 19 | 5  |
| --         | chr9 | 69954207 | G     | C   | -- | -- | IGR     | SNP | 0.280 | 18 | 7  |
| --         | chr9 | 69963999 | G     | C   | -- | -- | IGR     | SNP | 0.135 | 32 | 5  |
| --         | chr9 | 69964041 | G     | A   | -- | -- | IGR     | SNP | 0.115 | 23 | 3  |
| --         | chr9 | 69964102 | T     | A   | -- | -- | IGR     | SNP | 0.103 | 26 | 3  |
| --         | chr9 | 69965355 | C     | A   | -- | -- | IGR     | SNP | 0.130 | 47 | 7  |
| --         | chr9 | 69965356 | T     | G   | -- | -- | IGR     | SNP | 0.125 | 49 | 7  |
| --         | chr9 | 69968140 | A     | G   | -- | -- | IGR     | SNP | 0.458 | 13 | 11 |
| --         | chr9 | 69968972 | T     | C   | -- | -- | IGR     | SNP | 0.154 | 33 | 6  |
| --         | chr9 | 69970027 | C     | T   | -- | -- | IGR     | SNP | 0.286 | 10 | 4  |
| --         | chr9 | 69970285 | C     | T   | -- | -- | IGR     | SNP | 0.133 | 26 | 4  |
| --         | chr9 | 69970321 | T     | C   | -- | -- | IGR     | SNP | 0.185 | 22 | 5  |
| --         | chr9 | 69970348 | T     | C   | -- | -- | IGR     | SNP | 0.192 | 21 | 5  |
| --         | chr9 | 69971204 | T     | G   | -- | -- | IGR     | SNP | 0.714 | 4  | 10 |
| --         | chr9 | 69976459 | G     | C   | -- | -- | IGR     | SNP | 0.167 | 20 | 4  |
| --         | chr9 | 69986017 | G     | C   | -- | -- | IGR     | SNP | 0.222 | 14 | 4  |
| --         | chr9 | 69986019 | G     | A   | -- | -- | IGR     | SNP | 0.250 | 15 | 5  |
| --         | chr9 | 70006728 | C     | G   | -- | -- | IGR     | SNP | 0.476 | 11 | 10 |
| --         | chr9 | 70150699 | T     | C   | -- | -- | IGR     | SNP | 0.116 | 61 | 8  |
| FOXD4L5    | chr9 | 70174813 | T     | C   | -- | -- | 3'Flank | SNP | 0.333 | 14 | 7  |
| FOXD4L5    | chr9 | 70174858 | T     | G   | -- | -- | 3'Flank | SNP | 0.192 | 21 | 5  |
| --         | chr9 | 70576882 | T     | C   | -- | -- | IGR     | SNP | 0.323 | 21 | 10 |
| --         | chr9 | 70648539 | -     | AG  | -- | -- | IGR     | INS | 0.235 | 13 | 4  |
| --         | chr9 | 70648547 | -     | AG  | -- | -- | IGR     | INS | 0.250 | 12 | 4  |
| --         | chr9 | 70648568 | CCGGG | -   | -- | -- | IGR     | DEL | 0.211 | 15 | 4  |
| --         | chr9 | 70648582 | A     | G   | -- | -- | IGR     | SNP | 0.182 | 18 | 4  |
| --         | chr9 | 70653308 | C     | T   | -- | -- | IGR     | SNP | 0.167 | 25 | 5  |
| --         | chr9 | 70669539 | C     | G   | -- | -- | IGR     | SNP | 0.238 | 16 | 5  |
| --         | chr9 | 70678737 | T     | C   | -- | -- | IGR     | SNP | 0.186 | 35 | 8  |
| --         | chr9 | 71207469 | C     | T   | -- | -- | IGR     | SNP | 0.333 | 8  | 4  |
| PIP5K1B    | chr9 | 71620033 | -     | TTA | -- | -- | Intron  | INS | 0.111 | 32 | 4  |

|           |      |          |      |   |    |    |         |     |       |    |    |
|-----------|------|----------|------|---|----|----|---------|-----|-------|----|----|
| FAM189A2  | chr9 | 71981205 | C    | T | -- | -- | Intron  | SNP | 0.100 | 27 | 3  |
| MAMDC2    | chr9 | 72753858 | G    | C | -- | -- | Intron  | SNP | 0.903 | 3  | 28 |
| MAMDC2    | chr9 | 72753902 | G    | C | -- | -- | Intron  | SNP | 0.824 | 3  | 14 |
| MAMDC2    | chr9 | 72754930 | G    | C | -- | -- | Intron  | SNP | 0.958 | 1  | 23 |
| MAMDC2    | chr9 | 72755576 | G    | C | -- | -- | Intron  | SNP | 0.882 | 4  | 30 |
| MAMDC2    | chr9 | 72757946 | C    | T | -- | -- | Intron  | SNP | 0.960 | 1  | 24 |
| KLF9      | chr9 | 73013702 | C    | T | -- | -- | Intron  | SNP | 0.543 | 16 | 19 |
| TRPM3     | chr9 | 73456932 | A    | T | -- | -- | Intron  | SNP | 0.469 | 17 | 15 |
| --        | chr9 | 73933795 | C    | T | -- | -- | IGR     | SNP | 0.185 | 22 | 5  |
| TMEM2     | chr9 | 74358558 | T    | C | -- | -- | Intron  | SNP | 0.355 | 20 | 11 |
| C9orf85   | chr9 | 74575829 | G    | T | -- | -- | Intron  | SNP | 0.125 | 28 | 4  |
| TMC1      | chr9 | 75451978 | C    | T | -- | -- | 3'Flank | SNP | 0.303 | 23 | 10 |
| --        | chr9 | 75696249 | G    | T | -- | -- | IGR     | SNP | 0.538 | 6  | 7  |
| --        | chr9 | 75745233 | C    | T | -- | -- | IGR     | SNP | 0.333 | 22 | 11 |
| --        | chr9 | 75900617 | A    | T | -- | -- | IGR     | SNP | 0.107 | 25 | 3  |
| --        | chr9 | 76124492 | C    | A | -- | -- | IGR     | SNP | 0.348 | 15 | 8  |
| --        | chr9 | 76317590 | G    | C | -- | -- | IGR     | SNP | 0.417 | 21 | 15 |
| --        | chr9 | 76317591 | G    | T | -- | -- | IGR     | SNP | 0.417 | 21 | 15 |
| --        | chr9 | 76431787 | G    | T | -- | -- | IGR     | SNP | 0.844 | 5  | 27 |
| --        | chr9 | 76960804 | G    | A | -- | -- | IGR     | SNP | 0.458 | 13 | 11 |
| RORB      | chr9 | 77245750 | AAAG | - | -- | -- | Intron  | DEL | 0.133 | 26 | 4  |
| RORB      | chr9 | 77274352 | G    | A | -- | -- | Intron  | SNP | 0.844 | 5  | 27 |
| --        | chr9 | 77665162 | G    | T | -- | -- | IGR     | SNP | 0.429 | 16 | 12 |
| --        | chr9 | 77898008 | C    | A | -- | -- | IGR     | SNP | 0.600 | 2  | 3  |
| --        | chr9 | 78039422 | T    | G | -- | -- | IGR     | SNP | 0.909 | 3  | 30 |
| --        | chr9 | 78104039 | G    | T | -- | -- | IGR     | SNP | 0.500 | 9  | 9  |
| MIR548H3  | chr9 | 78252397 | C    | T | -- | -- | RNA     | SNP | 0.333 | 16 | 8  |
| MIR548H3  | chr9 | 78321325 | G    | C | -- | -- | RNA     | SNP | 0.120 | 22 | 3  |
| --        | chr9 | 78371856 | T    | C | -- | -- | IGR     | SNP | 0.308 | 18 | 8  |
| --        | chr9 | 78405899 | C    | T | -- | -- | IGR     | SNP | 0.167 | 20 | 4  |
| --        | chr9 | 78446681 | C    | G | -- | -- | IGR     | SNP | 0.478 | 12 | 11 |
| PCSK5     | chr9 | 78655323 | C    | A | -- | -- | Intron  | SNP | 0.300 | 7  | 3  |
| PCSK5     | chr9 | 78774812 | C    | A | -- | -- | Intron  | SNP | 0.333 | 14 | 7  |
| PCSK5     | chr9 | 78906967 | T    | C | -- | -- | Intron  | SNP | 0.391 | 14 | 9  |
| --        | chr9 | 79176189 | TTC  | - | -- | -- | IGR     | DEL | 0.133 | 13 | 2  |
| GNA14     | chr9 | 80141681 | C    | T | -- | -- | Intron  | SNP | 0.270 | 27 | 10 |
| --        | chr9 | 80325570 | T    | C | -- | -- | IGR     | SNP | 0.211 | 30 | 8  |
| --        | chr9 | 80746854 | C    | T | -- | -- | IGR     | SNP | 0.952 | 1  | 20 |
| --        | chr9 | 81025016 | C    | G | -- | -- | IGR     | SNP | 0.286 | 10 | 4  |
| --        | chr9 | 81185829 | A    | T | -- | -- | IGR     | SNP | 0.655 | 10 | 19 |
| --        | chr9 | 81398362 | T    | A | -- | -- | IGR     | SNP | 0.292 | 17 | 7  |
| --        | chr9 | 81765833 | G    | A | -- | -- | IGR     | SNP | 0.481 | 14 | 13 |
| --        | chr9 | 82451023 | G    | C | -- | -- | IGR     | SNP | 0.560 | 11 | 14 |
| --        | chr9 | 82757592 | A    | G | -- | -- | IGR     | SNP | 0.103 | 26 | 3  |
| --        | chr9 | 82972336 | G    | T | -- | -- | IGR     | SNP | 0.904 | 5  | 47 |
| --        | chr9 | 83053334 | TC   | - | -- | -- | IGR     | DEL | 0.333 | 16 | 8  |
| --        | chr9 | 83133558 | T    | A | -- | -- | IGR     | SNP | 0.667 | 1  | 2  |
| --        | chr9 | 83133559 | A    | T | -- | -- | IGR     | SNP | 0.667 | 1  | 2  |
| --        | chr9 | 83156459 | T    | C | -- | -- | IGR     | SNP | 0.429 | 16 | 12 |
| --        | chr9 | 83305652 | A    | T | -- | -- | IGR     | SNP | 0.267 | 11 | 4  |
| --        | chr9 | 83368616 | C    | T | -- | -- | IGR     | SNP | 0.313 | 22 | 10 |
| --        | chr9 | 83368618 | G    | A | -- | -- | IGR     | SNP | 0.303 | 23 | 10 |
| --        | chr9 | 83377588 | G    | A | -- | -- | IGR     | SNP | 0.484 | 16 | 15 |
| --        | chr9 | 83514532 | T    | A | -- | -- | IGR     | SNP | 0.200 | 20 | 5  |
| --        | chr9 | 83709472 | GT   | - | -- | -- | IGR     | DEL | 0.118 | 15 | 2  |
| --        | chr9 | 83763897 | C    | A | -- | -- | IGR     | SNP | 0.583 | 10 | 14 |
| --        | chr9 | 85164551 | T    | C | -- | -- | IGR     | SNP | 0.214 | 22 | 6  |
| --        | chr9 | 85360188 | C    | T | -- | -- | IGR     | SNP | 0.333 | 8  | 4  |
| --        | chr9 | 85372362 | C    | T | -- | -- | IGR     | SNP | 0.222 | 14 | 4  |
| --        | chr9 | 85389055 | A    | G | -- | -- | IGR     | SNP | 0.250 | 9  | 3  |
| --        | chr9 | 85503875 | C    | T | -- | -- | IGR     | SNP | 0.143 | 24 | 4  |
| --        | chr9 | 85503893 | C    | T | -- | -- | IGR     | SNP | 0.174 | 19 | 4  |
| --        | chr9 | 85759335 | AAAG | - | -- | -- | IGR     | DEL | 0.132 | 33 | 5  |
| FRMD3     | chr9 | 85993185 | TG   | - | -- | -- | Intron  | DEL | 0.125 | 14 | 2  |
| --        | chr9 | 86442152 | A    | C | -- | -- | IGR     | SNP | 1.000 | 0  | 10 |
| --        | chr9 | 86447784 | T    | C | -- | -- | IGR     | SNP | 0.923 | 2  | 24 |
| KIF27     | chr9 | 86479602 | G    | T | -- | -- | Intron  | SNP | 1.000 | 0  | 9  |
| --        | chr9 | 86761728 | C    | T | -- | -- | IGR     | SNP | 0.455 | 12 | 10 |
| --        | chr9 | 87021798 | G    | T | -- | -- | IGR     | SNP | 0.448 | 16 | 13 |
| --        | chr9 | 87705319 | T    | C | -- | -- | IGR     | SNP | 0.781 | 7  | 25 |
| --        | chr9 | 88044988 | C    | T | -- | -- | IGR     | SNP | 0.270 | 27 | 10 |
| LOC389765 | chr9 | 88433360 | T    | C | -- | -- | RNA     | SNP | 0.103 | 26 | 3  |
| --        | chr9 | 88460344 | A    | T | -- | -- | IGR     | SNP | 0.250 | 12 | 4  |
| --        | chr9 | 88477914 | A    | G | -- | -- | IGR     | SNP | 0.923 | 3  | 36 |
| --        | chr9 | 88477924 | A    | T | -- | -- | IGR     | SNP | 0.897 | 4  | 35 |
| --        | chr9 | 88748025 | C    | A | -- | -- | IGR     | SNP | 0.414 | 17 | 12 |
| --        | chr9 | 88748026 | A    | T | -- | -- | IGR     | SNP | 0.433 | 17 | 13 |
| --        | chr9 | 89194322 | C    | A | -- | -- | IGR     | SNP | 0.364 | 14 | 8  |
| --        | chr9 | 89203173 | G    | A | -- | -- | IGR     | SNP | 0.375 | 5  | 3  |
| --        | chr9 | 89203227 | G    | C | -- | -- | IGR     | SNP | 0.308 | 9  | 4  |

|           |      |           |       |      |       |      |                 |     |       |    |    |
|-----------|------|-----------|-------|------|-------|------|-----------------|-----|-------|----|----|
| --        | chr9 | 89226434  | G     | C    | --    | --   | IGR             | SNP | 0.222 | 14 | 4  |
| --        | chr9 | 89226494  | C     | T    | --    | --   | IGR             | SNP | 0.267 | 11 | 4  |
| --        | chr9 | 89568219  | G     | A    | --    | --   | IGR             | SNP | 0.810 | 4  | 17 |
| --        | chr9 | 89608659  | C     | T    | --    | --   | IGR             | SNP | 0.548 | 14 | 17 |
| --        | chr9 | 89685926  | G     | C    | --    | --   | IGR             | SNP | 0.444 | 20 | 16 |
| --        | chr9 | 89899558  | G     | T    | --    | --   | IGR             | SNP | 0.333 | 8  | 4  |
| --        | chr9 | 90028698  | T     | C    | --    | --   | IGR             | SNP | 0.192 | 21 | 5  |
| --        | chr9 | 90848758  | C     | A    | --    | --   | IGR             | SNP | 0.167 | 20 | 4  |
| --        | chr9 | 90906854  | G     | A    | --    | --   | IGR             | SNP | 0.351 | 24 | 13 |
| SPIN1     | chr9 | 91020451  | C     | T    | --    | --   | Intron          | SNP | 0.214 | 11 | 3  |
| --        | chr9 | 91282628  | C     | T    | --    | --   | IGR             | SNP | 0.261 | 17 | 6  |
| SHC3      | chr9 | 91787492  | GAC   | -    | --    | --   | Intron          | DEL | 0.121 | 29 | 4  |
| --        | chr9 | 92776332  | C     | T    | --    | --   | IGR             | SNP | 0.415 | 31 | 22 |
| --        | chr9 | 92813037  | C     | T    | --    | --   | IGR             | SNP | 0.115 | 23 | 3  |
| --        | chr9 | 92958489  | A     | G    | --    | --   | IGR             | SNP | 0.600 | 4  | 6  |
| --        | chr9 | 92988432  | CAGAG | -    | --    | --   | IGR             | DEL | 0.158 | 16 | 3  |
| --        | chr9 | 93179341  | C     | T    | --    | --   | IGR             | SNP | 0.190 | 17 | 4  |
| --        | chr9 | 93364908  | A     | T    | --    | --   | IGR             | SNP | 0.478 | 12 | 11 |
| --        | chr9 | 93506502  | C     | T    | --    | --   | IGR             | SNP | 0.300 | 14 | 6  |
| --        | chr9 | 93506509  | C     | A    | --    | --   | IGR             | SNP | 0.318 | 15 | 7  |
| --        | chr9 | 93518950  | A     | G    | --    | --   | IGR             | SNP | 0.100 | 27 | 3  |
| SYK       | chr9 | 93642330  | C     | T    | --    | --   | Intron          | SNP | 0.805 | 8  | 33 |
| --        | chr9 | 94412478  | AT    | -    | --    | --   | IGR             | DEL | 0.375 | 15 | 9  |
| ROR2      | chr9 | 94521790  | G     | A    | --    | --   | Intron          | SNP | 0.824 | 6  | 28 |
| CENPP     | chr9 | 95199693  | TG    | -    | --    | --   | Intron          | DEL | 0.111 | 16 | 2  |
| BICD2     | chr9 | 95526977  | G     | T    | C50A  | A17E | Missense_mutati | SNP | 0.417 | 7  | 5  |
| --        | chr9 | 95685661  | G     | T    | --    | --   | IGR             | SNP | 0.400 | 18 | 12 |
| WNK2      | chr9 | 95995267  | A     | G    | --    | --   | Intron          | SNP | 0.238 | 16 | 5  |
| --        | chr9 | 96113678  | T     | C    | --    | --   | IGR             | SNP | 0.208 | 19 | 5  |
| --        | chr9 | 96113939  | A     | G    | --    | --   | IGR             | SNP | 0.129 | 27 | 4  |
| --        | chr9 | 96690920  | G     | A    | --    | --   | IGR             | SNP | 0.854 | 6  | 35 |
| --        | chr9 | 96691561  | G     | A    | --    | --   | IGR             | SNP | 0.919 | 3  | 34 |
| --        | chr9 | 96740728  | G     | A    | --    | --   | IGR             | SNP | 0.357 | 27 | 15 |
| HIATL1    | chr9 | 97181828  | C     | A    | --    | --   | Intron          | SNP | 0.609 | 9  | 14 |
| --        | chr9 | 97224449  | G     | T    | --    | --   | IGR             | SNP | 0.273 | 8  | 3  |
| --        | chr9 | 97226165  | T     | G    | --    | --   | IGR             | SNP | 0.467 | 8  | 7  |
| C9orf3    | chr9 | 97707265  | G     | T    | --    | --   | Intron          | SNP | 0.364 | 21 | 12 |
| FANCC     | chr9 | 97866370  | G     | C    | --    | --   | Intron          | SNP | 0.413 | 27 | 19 |
| --        | chr9 | 98452128  | G     | C    | --    | --   | IGR             | SNP | 0.933 | 2  | 28 |
| --        | chr9 | 98470823  | G     | T    | --    | --   | IGR             | SNP | 0.267 | 33 | 12 |
| LOC158435 | chr9 | 98838629  | A     | G    | --    | --   | RNA             | SNP | 0.129 | 27 | 4  |
| CDC14B    | chr9 | 99372359  | T     | C    | --    | --   | Intron          | SNP | 0.500 | 12 | 12 |
| HIATL2    | chr9 | 99727075  | -     | TTCC | --    | --   | RNA             | INS | 0.129 | 27 | 4  |
| HIATL2    | chr9 | 99729398  | ATAT  | -    | --    | --   | RNA             | DEL | 0.105 | 17 | 2  |
| HIATL2    | chr9 | 99733542  | G     | T    | --    | --   | RNA             | SNP | 0.125 | 21 | 3  |
| --        | chr9 | 100167220 | C     | G    | --    | --   | IGR             | SNP | 0.800 | 7  | 28 |
| --        | chr9 | 100545769 | CTA   | -    | --    | --   | IGR             | DEL | 0.111 | 16 | 2  |
| --        | chr9 | 100558514 | G     | A    | --    | --   | IGR             | SNP | 0.108 | 33 | 4  |
| --        | chr9 | 100572885 | C     | A    | --    | --   | IGR             | SNP | 0.296 | 38 | 16 |
| GABBR2    | chr9 | 101103704 | C     | A    | --    | --   | Intron          | SNP | 0.931 | 2  | 27 |
| GABBR2    | chr9 | 101244183 | T     | A    | --    | --   | Intron          | SNP | 0.343 | 23 | 12 |
| --        | chr9 | 102117403 | G     | A    | --    | --   | IGR             | SNP | 0.393 | 17 | 11 |
| --        | chr9 | 102262078 | A     | T    | --    | --   | IGR             | SNP | 0.500 | 3  | 3  |
| --        | chr9 | 102318704 | G     | A    | --    | --   | IGR             | SNP | 0.567 | 13 | 17 |
| --        | chr9 | 103525089 | A     | G    | --    | --   | IGR             | SNP | 0.143 | 18 | 3  |
| --        | chr9 | 103527210 | T     | G    | --    | --   | IGR             | SNP | 0.300 | 7  | 3  |
| --        | chr9 | 103772312 | G     | T    | --    | --   | IGR             | SNP | 0.182 | 18 | 4  |
| LPPR1     | chr9 | 103846990 | G     | T    | --    | --   | Intron          | SNP | 0.875 | 4  | 28 |
| LPPR1     | chr9 | 104066533 | G     | T    | --    | --   | Intron          | SNP | 0.528 | 17 | 19 |
| --        | chr9 | 104737762 | A     | T    | --    | --   | IGR             | SNP | 0.391 | 14 | 9  |
| --        | chr9 | 104775766 | G     | T    | --    | --   | IGR             | SNP | 0.429 | 8  | 6  |
| --        | chr9 | 104775767 | A     | T    | --    | --   | IGR             | SNP | 0.429 | 8  | 6  |
| --        | chr9 | 104807730 | T     | G    | --    | --   | IGR             | SNP | 0.522 | 11 | 12 |
| --        | chr9 | 104874114 | C     | T    | --    | --   | IGR             | SNP | 0.267 | 11 | 4  |
| --        | chr9 | 105046334 | C     | G    | --    | --   | IGR             | SNP | 0.318 | 15 | 7  |
| --        | chr9 | 105091071 | C     | G    | --    | --   | IGR             | SNP | 0.857 | 5  | 30 |
| --        | chr9 | 105151098 | CTATT | -    | --    | --   | IGR             | DEL | 0.897 | 3  | 26 |
| --        | chr9 | 105380182 | G     | A    | --    | --   | IGR             | SNP | 0.833 | 4  | 20 |
| --        | chr9 | 105735854 | G     | T    | --    | --   | IGR             | SNP | 0.107 | 25 | 3  |
| --        | chr9 | 105968342 | A     | G    | --    | --   | IGR             | SNP | 0.208 | 19 | 5  |
| --        | chr9 | 106132875 | G     | A    | --    | --   | IGR             | SNP | 0.375 | 5  | 3  |
| --        | chr9 | 106146025 | -     | AC   | --    | --   | IGR             | INS | 0.875 | 2  | 14 |
| --        | chr9 | 106397719 | C     | A    | --    | --   | IGR             | SNP | 0.733 | 8  | 22 |
| --        | chr9 | 106511352 | G     | A    | --    | --   | IGR             | SNP | 0.789 | 8  | 30 |
| --        | chr9 | 106942463 | T     | A    | --    | --   | IGR             | SNP | 0.667 | 6  | 12 |
| OR13C4    | chr9 | 107289207 | G     | A    | C284T | S95F | Missense_mutati | SNP | 0.950 | 2  | 38 |
| --        | chr9 | 107319064 | G     | C    | --    | --   | IGR             | SNP | 0.842 | 3  | 16 |
| --        | chr9 | 107398701 | A     | C    | --    | --   | IGR             | SNP | 0.273 | 8  | 3  |
| --        | chr9 | 107413970 | A     | T    | --    | --   | IGR             | SNP | 0.182 | 18 | 4  |
| --        | chr9 | 107967872 | TGTGC | -    | --    | --   | IGR             | DEL | 0.143 | 18 | 3  |

|             |      |           |       |    |        |        |        |     |       |    |    |
|-------------|------|-----------|-------|----|--------|--------|--------|-----|-------|----|----|
| SLC44A1     | chr9 | 108143667 | C     | A  | --     | --     | Intron | SNP | 0.208 | 19 | 5  |
| --          | chr9 | 108184589 | G     | T  | --     | --     | IGR    | SNP | 0.286 | 10 | 4  |
| --          | chr9 | 108580796 | T     | G  | --     | --     | IGR    | SNP | 0.150 | 17 | 3  |
| --          | chr9 | 108580818 | G     | C  | --     | --     | IGR    | SNP | 0.167 | 15 | 3  |
| --          | chr9 | 109185744 | A     | T  | --     | --     | IGR    | SNP | 0.902 | 4  | 37 |
| --          | chr9 | 109415035 | T     | G  | --     | --     | IGR    | SNP | 0.478 | 12 | 11 |
| ZNF462      | chr9 | 109689490 | A     | C  | A3297C | P1099P | Silent | SNP | 0.429 | 4  | 3  |
| --          | chr9 | 110040879 | C     | T  | --     | --     | IGR    | SNP | 0.424 | 19 | 14 |
| --          | chr9 | 110549409 | G     | T  | --     | --     | IGR    | SNP | 0.286 | 10 | 4  |
| --          | chr9 | 110879929 | G     | T  | --     | --     | IGR    | SNP | 0.133 | 26 | 4  |
| --          | chr9 | 110963423 | G     | C  | --     | --     | IGR    | SNP | 0.972 | 1  | 35 |
| --          | chr9 | 111507304 | A     | T  | --     | --     | IGR    | SNP | 0.211 | 15 | 4  |
| --          | chr9 | 112376912 | G     | T  | --     | --     | IGR    | SNP | 0.364 | 21 | 12 |
| PALM2,PALM: | chr9 | 112581993 | G     | A  | --     | --     | Intron | SNP | 0.111 | 24 | 3  |
| --          | chr9 | 112975487 | T     | G  | --     | --     | IGR    | SNP | 0.881 | 5  | 37 |
| --          | chr9 | 112986634 | T     | A  | --     | --     | IGR    | SNP | 0.645 | 11 | 20 |
| --          | chr9 | 113607734 | A     | G  | --     | --     | IGR    | SNP | 0.273 | 24 | 9  |
| KIAA0368    | chr9 | 114180034 | -     | AG | --     | --     | Intron | INS | 0.621 | 11 | 18 |
| MIR3134     | chr9 | 114841111 | G     | T  | --     | --     | RNA    | SNP | 0.286 | 10 | 4  |
| HSDL2       | chr9 | 115157169 | G     | C  | --     | --     | Intron | SNP | 0.842 | 3  | 16 |
| KIAA1958    | chr9 | 115289305 | C     | G  | --     | --     | Intron | SNP | 0.533 | 14 | 16 |
| --          | chr9 | 115823994 | G     | T  | --     | --     | IGR    | SNP | 0.133 | 39 | 6  |
| BSPRY       | chr9 | 116120741 | T     | G  | --     | --     | Intron | SNP | 0.417 | 7  | 5  |
| RGS3        | chr9 | 116246607 | C     | A  | --     | --     | Intron | SNP | 0.267 | 11 | 4  |
| --          | chr9 | 117325070 | T     | A  | --     | --     | IGR    | SNP | 0.296 | 19 | 8  |
| C9orf91     | chr9 | 117386860 | T     | A  | --     | --     | Intron | SNP | 0.375 | 20 | 12 |
| --          | chr9 | 117660525 | G     | A  | --     | --     | IGR    | SNP | 0.571 | 9  | 12 |
| TNC         | chr9 | 117828180 | C     | A  | --     | --     | Intron | SNP | 0.211 | 15 | 4  |
| 1-Dec       | chr9 | 118000753 | C     | G  | --     | --     | Intron | SNP | 0.840 | 4  | 21 |
| --          | chr9 | 118220409 | AC    | -  | --     | --     | IGR    | DEL | 0.133 | 13 | 2  |
| --          | chr9 | 118279416 | G     | A  | --     | --     | IGR    | SNP | 0.850 | 3  | 17 |
| --          | chr9 | 118316503 | T     | C  | --     | --     | IGR    | SNP | 0.316 | 13 | 6  |
| --          | chr9 | 118428951 | G     | A  | --     | --     | IGR    | SNP | 0.148 | 23 | 4  |
| --          | chr9 | 118580407 | A     | G  | --     | --     | IGR    | SNP | 0.897 | 3  | 26 |
| --          | chr9 | 118592334 | G     | T  | --     | --     | IGR    | SNP | 0.308 | 9  | 4  |
| --          | chr9 | 118619696 | G     | C  | --     | --     | IGR    | SNP | 0.808 | 5  | 21 |
| --          | chr9 | 118910299 | G     | T  | --     | --     | IGR    | SNP | 0.409 | 13 | 9  |
| PAPPA       | chr9 | 118971104 | TTG   | -  | --     | --     | Intron | DEL | 0.107 | 25 | 3  |
| PAPPA       | chr9 | 119019849 | C     | T  | --     | --     | Intron | SNP | 0.800 | 2  | 8  |
| PAPPA       | chr9 | 119019999 | G     | A  | --     | --     | Intron | SNP | 0.880 | 3  | 22 |
| LOC1001285C | chr9 | 119294366 | A     | G  | --     | --     | RNA    | SNP | 0.211 | 15 | 4  |
| ASTN2       | chr9 | 119724547 | A     | T  | --     | --     | Intron | SNP | 0.406 | 19 | 13 |
| ASTN2       | chr9 | 120079435 | A     | G  | --     | --     | Intron | SNP | 0.806 | 6  | 25 |
| ASTN2       | chr9 | 120079436 | A     | C  | --     | --     | Intron | SNP | 0.793 | 6  | 23 |
| --          | chr9 | 120559498 | G     | T  | --     | --     | IGR    | SNP | 0.806 | 7  | 29 |
| --          | chr9 | 120561211 | T     | G  | --     | --     | IGR    | SNP | 0.161 | 26 | 5  |
| --          | chr9 | 121253037 | G     | C  | --     | --     | IGR    | SNP | 0.350 | 13 | 7  |
| --          | chr9 | 121423529 | GA    | -  | --     | --     | IGR    | DEL | 0.125 | 14 | 2  |
| --          | chr9 | 121434643 | GTGTA | -  | --     | --     | IGR    | DEL | 0.105 | 17 | 2  |
| --          | chr9 | 121561831 | G     | T  | --     | --     | IGR    | SNP | 0.368 | 12 | 7  |
| --          | chr9 | 121675539 | T     | C  | --     | --     | IGR    | SNP | 0.861 | 5  | 31 |
| --          | chr9 | 121684522 | G     | C  | --     | --     | IGR    | SNP | 0.821 | 5  | 23 |
| --          | chr9 | 121771989 | G     | T  | --     | --     | IGR    | SNP | 0.267 | 11 | 4  |
| DBC1        | chr9 | 122080693 | A     | G  | --     | --     | Intron | SNP | 0.885 | 3  | 23 |
| --          | chr9 | 122573444 | T     | A  | --     | --     | IGR    | SNP | 0.333 | 22 | 11 |
| --          | chr9 | 122651841 | GTC   | -  | --     | --     | IGR    | DEL | 0.167 | 20 | 4  |
| CDK5RAP2    | chr9 | 123260997 | AAT   | -  | --     | --     | Intron | DEL | 0.222 | 14 | 4  |
| CDK5RAP2    | chr9 | 123321848 | G     | A  | --     | --     | Intron | SNP | 0.462 | 7  | 6  |
| MEGF9       | chr9 | 123394665 | C     | T  | --     | --     | Intron | SNP | 0.200 | 24 | 6  |
| FBXW2       | chr9 | 123519481 | G     | A  | --     | --     | 3'UTR  | SNP | 0.842 | 6  | 32 |
| PSMD5       | chr9 | 123579858 | G     | A  | --     | --     | 3'UTR  | SNP | 0.483 | 15 | 14 |
| GSN         | chr9 | 124092530 | C     | T  | --     | --     | Intron | SNP | 0.893 | 3  | 25 |
| DAB2IP      | chr9 | 124424260 | CG    | -  | --     | --     | Intron | DEL | 0.125 | 20 | 3  |
| DAB2IP      | chr9 | 124435954 | G     | T  | --     | --     | Intron | SNP | 0.586 | 12 | 17 |
| --          | chr9 | 125190506 | T     | C  | --     | --     | IGR    | SNP | 0.500 | 3  | 3  |
| --          | chr9 | 125190507 | C     | T  | --     | --     | IGR    | SNP | 0.600 | 2  | 3  |
| --          | chr9 | 125211032 | C     | A  | --     | --     | IGR    | SNP | 0.483 | 15 | 14 |
| --          | chr9 | 125211033 | T     | C  | --     | --     | IGR    | SNP | 0.500 | 15 | 15 |
| --          | chr9 | 126869295 | T     | C  | --     | --     | IGR    | SNP | 0.308 | 9  | 4  |
| --          | chr9 | 126928029 | C     | A  | --     | --     | IGR    | SNP | 0.805 | 8  | 33 |
| --          | chr9 | 126956486 | T     | C  | --     | --     | IGR    | SNP | 0.455 | 18 | 15 |
| PSMB7       | chr9 | 127151051 | A     | T  | --     | --     | Intron | SNP | 0.974 | 1  | 38 |
| --          | chr9 | 127242374 | C     | A  | --     | --     | IGR    | SNP | 0.366 | 26 | 15 |
| NR6A1       | chr9 | 127312678 | G     | T  | --     | --     | Intron | SNP | 0.190 | 17 | 4  |
| NR6A1       | chr9 | 127372704 | T     | A  | --     | --     | Intron | SNP | 0.640 | 9  | 16 |
| SCAI        | chr9 | 127758874 | G     | T  | --     | --     | Intron | SNP | 0.190 | 17 | 4  |
| SCAI        | chr9 | 127871610 | G     | A  | --     | --     | Intron | SNP | 0.125 | 21 | 3  |
| RABEPK      | chr9 | 127973002 | G     | C  | --     | --     | Intron | SNP | 0.895 | 2  | 17 |
| --          | chr9 | 128785429 | G     | T  | --     | --     | IGR    | SNP | 0.477 | 23 | 21 |
| --          | chr9 | 128949031 | T     | C  | --     | --     | IGR    | SNP | 0.448 | 16 | 13 |

|                 |       |           |     |       |       |       |        |     |       |    |    |
|-----------------|-------|-----------|-----|-------|-------|-------|--------|-----|-------|----|----|
| --              | chr9  | 129305848 | T   | A     | --    | --    | IGR    | SNP | 0.167 | 20 | 4  |
| --              | chr9  | 129467662 | C   | A     | --    | --    | IGR    | SNP | 0.111 | 24 | 3  |
| --              | chr9  | 129486774 | A   | T     | --    | --    | IGR    | SNP | 0.295 | 31 | 13 |
| --              | chr9  | 129492671 | G   | T     | --    | --    | IGR    | SNP | 0.750 | 1  | 3  |
| <i>RALGPS1</i>  | chr9  | 129690575 | G   | A     | --    | --    | Intron | SNP | 0.930 | 3  | 40 |
| <i>STXBP1</i>   | chr9  | 130383614 | T   | G     | --    | --    | Intron | SNP | 0.765 | 4  | 13 |
| <i>STXBP1</i>   | chr9  | 130412543 | A   | G     | --    | --    | Intron | SNP | 0.227 | 17 | 5  |
| --              | chr9  | 130754508 | TTA | -     | --    | --    | IGR    | DEL | 0.114 | 31 | 4  |
| --              | chr9  | 131536804 | T   | A     | --    | --    | IGR    | SNP | 0.308 | 9  | 4  |
| --              | chr9  | 132040228 | AC  | -     | --    | --    | IGR    | DEL | 0.111 | 16 | 2  |
| <i>PRRX2</i>    | chr9  | 132446683 | C   | G     | --    | --    | Intron | SNP | 0.846 | 2  | 11 |
| <i>FNBP1</i>    | chr9  | 132689627 | C   | A     | --    | --    | Intron | SNP | 0.477 | 23 | 21 |
| --              | chr9  | 132925583 | C   | T     | --    | --    | IGR    | SNP | 0.250 | 12 | 4  |
| --              | chr9  | 133303412 | C   | A     | --    | --    | IGR    | SNP | 0.800 | 7  | 28 |
| --              | chr9  | 133303413 | T   | G     | --    | --    | IGR    | SNP | 0.806 | 7  | 29 |
| <i>RAPGEF1</i>  | chr9  | 134521131 | C   | A     | --    | --    | Intron | SNP | 0.300 | 21 | 9  |
| <i>MED27</i>    | chr9  | 134769844 | G   | T     | --    | --    | Intron | SNP | 0.920 | 2  | 23 |
| <i>MED27</i>    | chr9  | 134777120 | C   | T     | --    | --    | Intron | SNP | 0.538 | 18 | 21 |
| --              | chr9  | 135587939 | C   | A     | --    | --    | IGR    | SNP | 0.667 | 2  | 4  |
| <i>SLC2A6</i>   | chr9  | 136342235 | A   | C     | T384G | G128G | Silent | SNP | 0.160 | 21 | 4  |
| --              | chr9  | 136355954 | G   | A     | --    | --    | IGR    | SNP | 0.280 | 18 | 7  |
| <i>SARDH</i>    | chr9  | 136552934 | G   | T     | --    | --    | Intron | SNP | 0.333 | 26 | 13 |
| <i>VAV2</i>     | chr9  | 136675127 | G   | C     | --    | --    | Intron | SNP | 0.529 | 16 | 18 |
| <i>VAV2</i>     | chr9  | 136832174 | G   | A     | --    | --    | Intron | SNP | 0.207 | 23 | 6  |
| --              | chr9  | 137744366 | G   | A     | --    | --    | IGR    | SNP | 0.106 | 76 | 9  |
| <i>KIAA0649</i> | chr9  | 138374854 | G   | T     | --    | --    | Intron | SNP | 0.200 | 16 | 4  |
| <i>KCNT1</i>    | chr9  | 138682725 | C   | T     | --    | --    | Intron | SNP | 0.211 | 30 | 8  |
| --              | chr9  | 139144111 | T   | C     | --    | --    | IGR    | SNP | 0.286 | 10 | 4  |
| --              | chr9  | 139478494 | C   | G     | --    | --    | IGR    | SNP | 0.413 | 37 | 26 |
| --              | chr9  | 139508275 | C   | A     | --    | --    | IGR    | SNP | 0.828 | 5  | 24 |
| <i>KIAA1984</i> | chr9  | 139694134 | C   | T     | --    | --    | Intron | SNP | 0.205 | 35 | 9  |
| <i>UAP1L1</i>   | chr9  | 139973401 | G   | A     | --    | --    | Intron | SNP | 0.846 | 4  | 22 |
| --              | chr9  | 140025824 | T   | A     | --    | --    | IGR    | SNP | 0.400 | 6  | 4  |
| <i>EXD3</i>     | chr9  | 140223546 | A   | G     | --    | --    | Intron | SNP | 0.192 | 21 | 5  |
| <i>EXD3</i>     | chr9  | 140273810 | C   | T     | --    | --    | Intron | SNP | 0.200 | 28 | 7  |
| <i>CACNA1B</i>  | chr9  | 140798992 | A   | T     | --    | --    | Intron | SNP | 0.857 | 2  | 12 |
| --              | chr9  | 141073817 | T   | C     | --    | --    | IGR    | SNP | 0.350 | 13 | 7  |
| --              | chr9  | 141085150 | C   | T     | --    | --    | IGR    | SNP | 0.185 | 22 | 5  |
| --              | chr9  | 141086004 | G   | A     | --    | --    | IGR    | SNP | 0.188 | 26 | 6  |
| --              | chr9  | 141086617 | G   | C     | --    | --    | IGR    | SNP | 0.209 | 34 | 9  |
| --              | chr10 | 67472     | G   | A     | --    | --    | IGR    | SNP | 0.500 | 6  | 6  |
| --              | chr10 | 67716     | G   | A     | --    | --    | IGR    | SNP | 0.111 | 32 | 4  |
| --              | chr10 | 85218     | C   | A     | --    | --    | IGR    | SNP | 0.600 | 2  | 3  |
| --              | chr10 | 85430     | G   | T     | --    | --    | IGR    | SNP | 0.429 | 4  | 3  |
| --              | chr10 | 122788    | T   | G     | --    | --    | IGR    | SNP | 0.200 | 20 | 5  |
| --              | chr10 | 122799    | C   | G     | --    | --    | IGR    | SNP | 0.333 | 10 | 5  |
| <i>ZMYND11</i>  | chr10 | 297773    | -   | AAAAT | --    | --    | Intron | INS | 0.389 | 21 | 14 |
| <i>DIP2C</i>    | chr10 | 391780    | T   | C     | --    | --    | Intron | SNP | 0.375 | 10 | 6  |
| <i>DIP2C</i>    | chr10 | 393215    | C   | T     | --    | --    | Intron | SNP | 0.194 | 29 | 7  |
| <i>DIP2C</i>    | chr10 | 693214    | A   | C     | --    | --    | Intron | SNP | 0.108 | 66 | 8  |
| <i>DIP2C</i>    | chr10 | 695226    | G   | C     | --    | --    | Intron | SNP | 0.500 | 5  | 5  |
| --              | chr10 | 748634    | T   | A     | --    | --    | IGR    | SNP | 0.269 | 19 | 7  |
| --              | chr10 | 751268    | AG  | -     | --    | --    | IGR    | DEL | 0.105 | 17 | 2  |
| --              | chr10 | 1213279   | C   | T     | --    | --    | IGR    | SNP | 0.286 | 20 | 8  |
| <i>ADARB2</i>   | chr10 | 1260401   | G   | A     | --    | --    | Intron | SNP | 0.500 | 4  | 4  |
| <i>ADARB2</i>   | chr10 | 1282024   | T   | C     | --    | --    | Intron | SNP | 0.400 | 6  | 4  |
| <i>ADARB2</i>   | chr10 | 1300560   | A   | G     | --    | --    | Intron | SNP | 0.242 | 25 | 8  |
| <i>ADARB2</i>   | chr10 | 1300570   | T   | A     | --    | --    | Intron | SNP | 0.286 | 20 | 8  |
| <i>ADARB2</i>   | chr10 | 1333817   | G   | C     | --    | --    | Intron | SNP | 0.429 | 12 | 9  |
| <i>ADARB2</i>   | chr10 | 1347994   | C   | A     | --    | --    | Intron | SNP | 0.300 | 7  | 3  |
| <i>ADARB2</i>   | chr10 | 1348026   | G   | A     | --    | --    | Intron | SNP | 0.286 | 5  | 2  |
| --              | chr10 | 1806819   | C   | T     | --    | --    | IGR    | SNP | 0.857 | 2  | 12 |
| --              | chr10 | 2067133   | T   | C     | --    | --    | IGR    | SNP | 0.276 | 21 | 8  |
| --              | chr10 | 2103625   | G   | A     | --    | --    | IGR    | SNP | 0.762 | 5  | 16 |
| --              | chr10 | 2126495   | C   | G     | --    | --    | IGR    | SNP | 0.379 | 18 | 11 |
| --              | chr10 | 2316553   | A   | T     | --    | --    | IGR    | SNP | 0.435 | 13 | 10 |
| --              | chr10 | 2478436   | T   | G     | --    | --    | IGR    | SNP | 1.000 | 0  | 3  |
| --              | chr10 | 2481879   | C   | T     | --    | --    | IGR    | SNP | 0.417 | 14 | 10 |
| --              | chr10 | 2564700   | C   | T     | --    | --    | IGR    | SNP | 0.500 | 3  | 3  |
| --              | chr10 | 2657242   | G   | A     | --    | --    | IGR    | SNP | 0.429 | 12 | 9  |
| --              | chr10 | 2674011   | C   | T     | --    | --    | IGR    | SNP | 0.846 | 4  | 22 |
| --              | chr10 | 2875449   | A   | G     | --    | --    | IGR    | SNP | 0.148 | 23 | 4  |
| <i>PITRM1</i>   | chr10 | 3213571   | G   | C     | --    | --    | Intron | SNP | 0.217 | 18 | 5  |
| --              | chr10 | 3521119   | G   | T     | --    | --    | IGR    | SNP | 0.333 | 26 | 13 |
| --              | chr10 | 3860752   | T   | A     | --    | --    | IGR    | SNP | 0.886 | 5  | 39 |
| --              | chr10 | 3968274   | TTG | -     | --    | --    | IGR    | DEL | 0.200 | 12 | 3  |
| --              | chr10 | 4304139   | T   | C     | --    | --    | IGR    | SNP | 0.214 | 11 | 3  |
| --              | chr10 | 4360917   | T   | C     | --    | --    | IGR    | SNP | 0.632 | 7  | 12 |
| --              | chr10 | 4452467   | C   | T     | --    | --    | IGR    | SNP | 0.815 | 5  | 22 |
| --              | chr10 | 4974199   | G   | C     | --    | --    | IGR    | SNP | 0.778 | 6  | 21 |

|                    |       |          |     |       |    |    |        |     |       |    |    |
|--------------------|-------|----------|-----|-------|----|----|--------|-----|-------|----|----|
| --                 | chr10 | 5309520  | G   | T     | -- | -- | IGR    | SNP | 0.852 | 4  | 23 |
| --                 | chr10 | 5377964  | G   | T     | -- | -- | IGR    | SNP | 0.833 | 3  | 15 |
| --                 | chr10 | 5863327  | G   | A     | -- | -- | IGR    | SNP | 0.417 | 7  | 5  |
| <i>FBXO18</i>      | chr10 | 5943525  | C   | T     | -- | -- | Intron | SNP | 0.200 | 20 | 5  |
| --                 | chr10 | 6027273  | T   | C     | -- | -- | IGR    | SNP | 0.130 | 20 | 3  |
| <i>IL2RA</i>       | chr10 | 6094667  | A   | C     | -- | -- | Intron | SNP | 0.857 | 4  | 24 |
| --                 | chr10 | 6643754  | A   | C     | -- | -- | IGR    | SNP | 0.286 | 10 | 4  |
| --                 | chr10 | 6661701  | G   | C     | -- | -- | IGR    | SNP | 0.227 | 17 | 5  |
| --                 | chr10 | 6674853  | -   | GAGTC | -- | -- | IGR    | INS | 0.188 | 13 | 3  |
| --                 | chr10 | 6675270  | G   | A     | -- | -- | IGR    | SNP | 0.214 | 11 | 3  |
| <i>LOC10050712</i> | chr10 | 6866325  | C   | T     | -- | -- | RNA    | SNP | 0.200 | 16 | 4  |
| --                 | chr10 | 6962822  | A   | G     | -- | -- | IGR    | SNP | 0.444 | 10 | 8  |
| --                 | chr10 | 6984473  | G   | C     | -- | -- | IGR    | SNP | 0.423 | 15 | 11 |
| --                 | chr10 | 7039111  | G   | T     | -- | -- | IGR    | SNP | 0.808 | 5  | 21 |
| --                 | chr10 | 7177917  | A   | T     | -- | -- | IGR    | SNP | 0.290 | 22 | 9  |
| <i>SFMBT2</i>      | chr10 | 7323784  | T   | G     | -- | -- | Intron | SNP | 0.423 | 15 | 11 |
| <i>SFMBT2</i>      | chr10 | 7333737  | T   | C     | -- | -- | Intron | SNP | 0.481 | 14 | 13 |
| --                 | chr10 | 7494671  | G   | A     | -- | -- | IGR    | SNP | 0.828 | 5  | 24 |
| <i>ITIH2</i>       | chr10 | 7761723  | C   | A     | -- | -- | Intron | SNP | 1.000 | 0  | 3  |
| <i>ATP5C1</i>      | chr10 | 7834414  | A   | G     | -- | -- | Intron | SNP | 0.458 | 13 | 11 |
| <i>TAF3</i>        | chr10 | 7919459  | G   | C     | -- | -- | Intron | SNP | 0.875 | 3  | 21 |
| <i>TAF3</i>        | chr10 | 7992676  | C   | T     | -- | -- | Intron | SNP | 0.897 | 4  | 35 |
| --                 | chr10 | 8061960  | C   | T     | -- | -- | IGR    | SNP | 0.500 | 4  | 4  |
| --                 | chr10 | 8312857  | A   | T     | -- | -- | IGR    | SNP | 0.375 | 15 | 9  |
| --                 | chr10 | 8581569  | C   | T     | -- | -- | IGR    | SNP | 0.429 | 16 | 12 |
| --                 | chr10 | 8616062  | G   | T     | -- | -- | IGR    | SNP | 0.900 | 3  | 27 |
| --                 | chr10 | 8616077  | G   | A     | -- | -- | IGR    | SNP | 0.914 | 3  | 32 |
| --                 | chr10 | 8723465  | CTT | -     | -- | -- | IGR    | DEL | 0.103 | 26 | 3  |
| --                 | chr10 | 8932895  | G   | T     | -- | -- | IGR    | SNP | 0.231 | 20 | 6  |
| --                 | chr10 | 8947115  | T   | G     | -- | -- | IGR    | SNP | 0.808 | 5  | 21 |
| --                 | chr10 | 8966587  | G   | C     | -- | -- | IGR    | SNP | 0.500 | 18 | 18 |
| --                 | chr10 | 9199156  | A   | G     | -- | -- | IGR    | SNP | 0.593 | 11 | 16 |
| --                 | chr10 | 9236803  | G   | A     | -- | -- | IGR    | SNP | 0.368 | 12 | 7  |
| --                 | chr10 | 9315980  | G   | C     | -- | -- | IGR    | SNP | 0.286 | 10 | 4  |
| --                 | chr10 | 9672791  | T   | C     | -- | -- | IGR    | SNP | 0.360 | 16 | 9  |
| --                 | chr10 | 9755862  | AAT | -     | -- | -- | IGR    | DEL | 0.133 | 13 | 2  |
| --                 | chr10 | 9803745  | G   | T     | -- | -- | IGR    | SNP | 0.300 | 7  | 3  |
| --                 | chr10 | 10049304 | C   | G     | -- | -- | IGR    | SNP | 0.833 | 5  | 25 |
| --                 | chr10 | 10149022 | C   | T     | -- | -- | IGR    | SNP | 1.000 | 0  | 2  |
| --                 | chr10 | 10173819 | G   | A     | -- | -- | IGR    | SNP | 0.556 | 12 | 15 |
| --                 | chr10 | 10308956 | T   | A     | -- | -- | IGR    | SNP | 0.400 | 6  | 4  |
| --                 | chr10 | 10451566 | T   | A     | -- | -- | IGR    | SNP | 0.217 | 18 | 5  |
| --                 | chr10 | 10465150 | T   | A     | -- | -- | IGR    | SNP | 0.389 | 11 | 7  |
| --                 | chr10 | 10752972 | T   | G     | -- | -- | IGR    | SNP | 0.485 | 17 | 16 |
| <i>LOC254312</i>   | chr10 | 10993493 | G   | A     | -- | -- | RNA    | SNP | 0.100 | 27 | 3  |
| --                 | chr10 | 11036276 | A   | C     | -- | -- | IGR    | SNP | 0.429 | 16 | 12 |
| --                 | chr10 | 11812730 | AT  | -     | -- | -- | IGR    | DEL | 0.111 | 16 | 2  |
| --                 | chr10 | 11861636 | G   | C     | -- | -- | IGR    | SNP | 0.455 | 18 | 15 |
| <i>CAMK1D</i>      | chr10 | 12515761 | C   | G     | -- | -- | Intron | SNP | 0.161 | 26 | 5  |
| <i>CAMK1D</i>      | chr10 | 12864036 | C   | A     | -- | -- | Intron | SNP | 0.378 | 28 | 17 |
| --                 | chr10 | 12901927 | G   | A     | -- | -- | IGR    | SNP | 0.500 | 3  | 3  |
| --                 | chr10 | 13106924 | C   | A     | -- | -- | IGR    | SNP | 0.333 | 18 | 9  |
| --                 | chr10 | 13296896 | AG  | -     | -- | -- | IGR    | DEL | 0.118 | 15 | 2  |
| <i>FRMD4A</i>      | chr10 | 13853741 | G   | A     | -- | -- | Intron | SNP | 0.267 | 22 | 8  |
| <i>FRMD4A</i>      | chr10 | 13906803 | C   | T     | -- | -- | Intron | SNP | 0.267 | 11 | 4  |
| <i>FRMD4A</i>      | chr10 | 14074387 | T   | A     | -- | -- | Intron | SNP | 0.195 | 33 | 8  |
| --                 | chr10 | 14387926 | C   | T     | -- | -- | IGR    | SNP | 0.409 | 13 | 9  |
| <i>FAM107B</i>     | chr10 | 14803010 | C   | A     | -- | -- | Intron | SNP | 0.188 | 13 | 3  |
| <i>HSPA14</i>      | chr10 | 14909394 | G   | A     | -- | -- | Intron | SNP | 0.906 | 3  | 29 |
| <i>ITGA8</i>       | chr10 | 15595996 | AG  | -     | -- | -- | Intron | DEL | 0.235 | 13 | 4  |
| <i>FAM188A</i>     | chr10 | 15859564 | TTG | -     | -- | -- | Intron | DEL | 0.118 | 15 | 2  |
| --                 | chr10 | 16005153 | G   | C     | -- | -- | IGR    | SNP | 0.929 | 2  | 26 |
| --                 | chr10 | 16019858 | T   | C     | -- | -- | IGR    | SNP | 0.382 | 21 | 13 |
| --                 | chr10 | 16203759 | G   | A     | -- | -- | IGR    | SNP | 0.833 | 5  | 25 |
| --                 | chr10 | 16363298 | G   | A     | -- | -- | IGR    | SNP | 0.250 | 9  | 3  |
| <i>CUBN</i>        | chr10 | 16988761 | C   | T     | -- | -- | Intron | SNP | 0.960 | 1  | 24 |
| <i>TRDMT1</i>      | chr10 | 17222793 | C   | A     | -- | -- | Intron | SNP | 0.867 | 4  | 26 |
| <i>ST8SIA6</i>     | chr10 | 17469397 | G   | T     | -- | -- | Intron | SNP | 0.250 | 33 | 11 |
| --                 | chr10 | 17516652 | C   | G     | -- | -- | IGR    | SNP | 0.938 | 1  | 15 |
| --                 | chr10 | 17535460 | G   | A     | -- | -- | IGR    | SNP | 0.417 | 7  | 5  |
| <i>PTPLA</i>       | chr10 | 17647727 | T   | G     | -- | -- | Intron | SNP | 0.200 | 16 | 4  |
| --                 | chr10 | 18232457 | C   | A     | -- | -- | IGR    | SNP | 0.367 | 19 | 11 |
| <i>CACNB2</i>      | chr10 | 18737426 | A   | G     | -- | -- | Intron | SNP | 0.308 | 9  | 4  |
| <i>CACNB2</i>      | chr10 | 18782349 | C   | T     | -- | -- | Intron | SNP | 0.750 | 5  | 15 |
| <i>CACNB2</i>      | chr10 | 18785773 | G   | A     | -- | -- | Intron | SNP | 0.231 | 10 | 3  |
| <i>NSUN6</i>       | chr10 | 18881823 | CA  | -     | -- | -- | Intron | DEL | 0.167 | 15 | 3  |
| --                 | chr10 | 19290851 | T   | C     | -- | -- | IGR    | SNP | 0.294 | 12 | 5  |
| --                 | chr10 | 19420280 | T   | A     | -- | -- | IGR    | SNP | 0.852 | 4  | 23 |
| --                 | chr10 | 19472061 | G   | T     | -- | -- | IGR    | SNP | 0.267 | 11 | 4  |
| --                 | chr10 | 20084170 | C   | A     | -- | -- | IGR    | SNP | 0.935 | 2  | 29 |

|             |       |          |       |   |                        |                 |        |       |       |    |    |
|-------------|-------|----------|-------|---|------------------------|-----------------|--------|-------|-------|----|----|
| --          | chr10 | 20093288 | G     | A | --                     | --              | IGR    | SNP   | 0.526 | 9  | 10 |
| PLXDC2      | chr10 | 20123175 | T     | A | --                     | --              | Intron | SNP   | 0.115 | 23 | 3  |
| PLXDC2      | chr10 | 20425009 | C     | A | --                     | --              | Intron | SNP   | 0.167 | 15 | 3  |
| PLXDC2      | chr10 | 20425010 | A     | C | --                     | --              | Intron | SNP   | 0.176 | 14 | 3  |
| --          | chr10 | 20749060 | A     | T | --                     | --              | IGR    | SNP   | 0.143 | 18 | 3  |
| --          | chr10 | 20750227 | T     | A | --                     | --              | IGR    | SNP   | 0.417 | 7  | 5  |
| --          | chr10 | 20750233 | T     | A | --                     | --              | IGR    | SNP   | 0.385 | 8  | 5  |
| --          | chr10 | 20770387 | C     | A | --                     | --              | IGR    | SNP   | 0.913 | 2  | 21 |
| --          | chr10 | 20770388 | T     | A | --                     | --              | IGR    | SNP   | 0.913 | 2  | 21 |
| --          | chr10 | 20817015 | CT    | - | --                     | --              | IGR    | DEL   | 0.105 | 17 | 2  |
| DNAJC1      | chr10 | 22059345 | G     | T | --                     | --              | Intron | SNP   | 0.364 | 7  | 4  |
| DNAJC1      | chr10 | 22242781 | G     | A | --                     | --              | Intron | SNP   | 0.538 | 6  | 7  |
| --          | chr10 | 22326654 | G     | C | --                     | --              | IGR    | SNP   | 0.794 | 7  | 27 |
| --          | chr10 | 22352699 | C     | A | --                     | --              | IGR    | SNP   | 0.148 | 23 | 4  |
| --          | chr10 | 22352704 | G     | A | --                     | --              | IGR    | SNP   | 0.148 | 23 | 4  |
| --          | chr10 | 22367329 | T     | G | --                     | --              | IGR    | SNP   | 0.323 | 21 | 10 |
| --          | chr10 | 22495948 | A     | G | --                     | --              | IGR    | SNP   | 0.483 | 15 | 14 |
| LOC10013095 | chr10 | 22547012 | T     | A | --                     | --              | RNA    | SNP   | 0.386 | 27 | 17 |
| BMI1        | chr10 | 22610320 | CGAG  | - | --                     | --              | 5'UTR  | DEL   | 0.133 | 13 | 2  |
| --          | chr10 | 23205092 | G     | A | --                     | --              | IGR    | SNP   | 0.379 | 18 | 11 |
| ARMC3       | chr10 | 23232796 | G     | A | --                     | --              | Intron | SNP   | 0.704 | 8  | 19 |
| --          | chr10 | 23349619 | C     | T | --                     | --              | IGR    | SNP   | 0.265 | 25 | 9  |
| --          | chr10 | 23478083 | G     | A | --                     | --              | IGR    | SNP   | 0.875 | 3  | 21 |
| --          | chr10 | 23660212 | C     | T | --                     | --              | IGR    | SNP   | 0.733 | 4  | 11 |
| --          | chr10 | 23814046 | G     | C | --                     | --              | IGR    | SNP   | 0.805 | 8  | 33 |
| KIAA1217    | chr10 | 24140166 | C     | G | --                     | --              | Intron | SNP   | 0.167 | 25 | 5  |
| KIAA1217    | chr10 | 24140170 | C     | T | --                     | --              | Intron | SNP   | 0.125 | 28 | 4  |
| KIAA1217    | chr10 | 24818420 | TTA   | - | --                     | --              | Intron | DEL   | 0.130 | 20 | 3  |
| PRTFDC1     | chr10 | 25213585 | A     | T | --                     | --              | Intron | SNP   | 0.333 | 8  | 4  |
| PRTFDC1     | chr10 | 25213588 | C     | T | --                     | --              | Intron | SNP   | 0.333 | 8  | 4  |
| GPR158      | chr10 | 25856539 | G     | A | --                     | --              | Intron | SNP   | 0.630 | 10 | 17 |
| GPR158      | chr10 | 25860572 | T     | A | --                     | --              | Intron | SNP   | 0.821 | 5  | 23 |
| --          | chr10 | 26059255 | T     | C | --                     | --              | IGR    | SNP   | 0.143 | 18 | 3  |
| --          | chr10 | 26211083 | G     | A | --                     | --              | IGR    | SNP   | 0.438 | 9  | 7  |
| MYO3A       | chr10 | 26402418 | A     | C | --                     | --              | Intron | SNP   | 0.300 | 14 | 6  |
| MYO3A       | chr10 | 26470848 | A     | G | --                     | --              | Intron | SNP   | 0.393 | 17 | 11 |
| --          | chr10 | 27290707 | C     | G | --                     | --              | IGR    | SNP   | 0.931 | 2  | 27 |
| --          | chr10 | 27581039 | G     | T | --                     | --              | IGR    | SNP   | 0.800 | 3  | 12 |
| --          | chr10 | 27755913 | G     | A | --                     | --              | IGR    | SNP   | 0.125 | 28 | 4  |
| --          | chr10 | 28064711 | G     | C | --                     | --              | IGR    | SNP   | 0.829 | 6  | 29 |
| ARMC4       | chr10 | 28212526 | G     | A | --                     | --              | Intron | SNP   | 0.414 | 17 | 12 |
| ARMC4       | chr10 | 28243396 | T     | C | --                     | --              | Intron | SNP   | 0.130 | 20 | 3  |
| --          | chr10 | 28722687 | C     | T | --                     | --              | IGR    | SNP   | 0.375 | 5  | 3  |
| --          | chr10 | 29006933 | C     | T | --                     | --              | IGR    | SNP   | 0.222 | 21 | 6  |
| --          | chr10 | 29715853 | A     | G | --                     | --              | IGR    | SNP   | 0.286 | 10 | 4  |
| SVIL        | chr10 | 29762909 | C     | T | G4109A,G538R1370H,R179 | Missense_mutati | SNP    | 0.429 | 20    | 15 |    |
| --          | chr10 | 30221805 | G     | C | --                     | --              | IGR    | SNP   | 0.719 | 9  | 23 |
| --          | chr10 | 30797945 | A     | T | --                     | --              | IGR    | SNP   | 0.323 | 21 | 10 |
| --          | chr10 | 30922223 | A     | C | --                     | --              | IGR    | SNP   | 0.167 | 25 | 5  |
| --          | chr10 | 30922227 | A     | G | --                     | --              | IGR    | SNP   | 0.167 | 25 | 5  |
| --          | chr10 | 31071409 | CAG   | - | --                     | --              | IGR    | DEL   | 0.118 | 15 | 2  |
| --          | chr10 | 31079558 | C     | T | --                     | --              | IGR    | SNP   | 0.824 | 3  | 14 |
| ZNF438      | chr10 | 31228801 | A     | C | --                     | --              | Intron | SNP   | 0.848 | 5  | 28 |
| --          | chr10 | 31539587 | TAACA | - | --                     | --              | IGR    | DEL   | 0.105 | 17 | 2  |
| ZEB1        | chr10 | 31652185 | TG    | - | --                     | --              | Intron | DEL   | 0.167 | 35 | 7  |
| --          | chr10 | 31930948 | CA    | - | --                     | --              | IGR    | DEL   | 0.111 | 24 | 3  |
| --          | chr10 | 31939303 | T     | G | --                     | --              | IGR    | SNP   | 0.304 | 32 | 14 |
| --          | chr10 | 31939304 | G     | T | --                     | --              | IGR    | SNP   | 0.304 | 32 | 14 |
| --          | chr10 | 32006265 | AG    | - | --                     | --              | IGR    | DEL   | 0.316 | 13 | 6  |
| KIF5B       | chr10 | 32331478 | T     | G | --                     | --              | Intron | SNP   | 0.333 | 20 | 10 |
| --          | chr10 | 32447161 | C     | T | --                     | --              | IGR    | SNP   | 0.412 | 10 | 7  |
| C10orf68    | chr10 | 32905243 | G     | C | --                     | --              | Intron | SNP   | 0.786 | 6  | 22 |
| C10orf68    | chr10 | 33038528 | G     | C | --                     | --              | Intron | SNP   | 0.875 | 2  | 14 |
| C10orf68    | chr10 | 33117437 | A     | G | --                     | --              | Intron | SNP   | 0.308 | 9  | 4  |
| NRP1        | chr10 | 33488110 | C     | T | --                     | --              | Intron | SNP   | 0.846 | 2  | 11 |
| NRP1        | chr10 | 33583499 | T     | C | --                     | --              | Intron | SNP   | 0.353 | 11 | 6  |
| --          | chr10 | 34129758 | GTA   | - | --                     | --              | IGR    | DEL   | 0.400 | 12 | 8  |
| --          | chr10 | 34285354 | T     | A | --                     | --              | IGR    | SNP   | 0.222 | 21 | 6  |
| PARD3       | chr10 | 35005508 | C     | T | --                     | --              | Intron | SNP   | 0.500 | 5  | 5  |
| CREM        | chr10 | 35492655 | G     | T | --                     | --              | Intron | SNP   | 0.421 | 11 | 8  |
| CCNY        | chr10 | 35763063 | T     | C | --                     | --              | Intron | SNP   | 0.182 | 18 | 4  |
| --          | chr10 | 36049434 | C     | G | --                     | --              | IGR    | SNP   | 0.462 | 21 | 18 |
| --          | chr10 | 36380409 | C     | A | --                     | --              | IGR    | SNP   | 0.583 | 10 | 14 |
| --          | chr10 | 36643160 | T     | A | --                     | --              | IGR    | SNP   | 0.250 | 12 | 4  |
| --          | chr10 | 36643161 | C     | T | --                     | --              | IGR    | SNP   | 0.267 | 11 | 4  |
| --          | chr10 | 36736621 | G     | A | --                     | --              | IGR    | SNP   | 0.267 | 11 | 4  |
| --          | chr10 | 36817237 | G     | A | --                     | --              | IGR    | SNP   | 0.684 | 6  | 13 |
| --          | chr10 | 37044634 | T     | C | --                     | --              | IGR    | SNP   | 0.345 | 19 | 10 |
| --          | chr10 | 37136378 | G     | C | --                     | --              | IGR    | SNP   | 0.346 | 17 | 9  |
| --          | chr10 | 37259395 | T     | A | --                     | --              | IGR    | SNP   | 0.270 | 27 | 10 |

|            |       |          |             |    |    |    |         |     |       |    |    |
|------------|-------|----------|-------------|----|----|----|---------|-----|-------|----|----|
| --         | chr10 | 37324356 | G           | A  | -- | -- | IGR     | SNP | 0.345 | 19 | 10 |
| ANKRD30A   | chr10 | 37422033 | A           | T  | -- | -- | Intron  | SNP | 0.148 | 23 | 4  |
| --         | chr10 | 37598724 | G           | A  | -- | -- | IGR     | SNP | 0.208 | 19 | 5  |
| --         | chr10 | 37699228 | C           | A  | -- | -- | IGR     | SNP | 0.250 | 9  | 3  |
| --         | chr10 | 37749917 | G           | T  | -- | -- | IGR     | SNP | 0.125 | 21 | 3  |
| --         | chr10 | 37918083 | -           | CT | -- | -- | IGR     | INS | 0.125 | 14 | 2  |
| --         | chr10 | 38006430 | T           | C  | -- | -- | IGR     | SNP | 0.300 | 14 | 6  |
| --         | chr10 | 38187191 | A           | G  | -- | -- | IGR     | SNP | 0.500 | 3  | 3  |
| ZNF37A     | chr10 | 38408338 | AT          | -  | -- | -- | 3'UTR   | DEL | 0.641 | 14 | 25 |
| --         | chr10 | 38572218 | A           | G  | -- | -- | IGR     | SNP | 0.160 | 21 | 4  |
| --         | chr10 | 38580629 | T           | C  | -- | -- | IGR     | SNP | 0.174 | 19 | 4  |
| --         | chr10 | 38589475 | G           | A  | -- | -- | IGR     | SNP | 0.143 | 24 | 4  |
| --         | chr10 | 38589480 | G           | A  | -- | -- | IGR     | SNP | 0.167 | 20 | 4  |
| --         | chr10 | 38670951 | A           | G  | -- | -- | IGR     | SNP | 0.185 | 22 | 5  |
| LOC399744  | chr10 | 38723101 | ATTTTGTGTTA | -  | -- | -- | RNA     | DEL | 0.111 | 16 | 2  |
| --         | chr10 | 38744632 | G           | A  | -- | -- | IGR     | SNP | 0.118 | 30 | 4  |
| --         | chr10 | 38800988 | T           | A  | -- | -- | IGR     | SNP | 0.154 | 44 | 8  |
| --         | chr10 | 38886418 | T           | A  | -- | -- | IGR     | SNP | 0.822 | 8  | 37 |
| --         | chr10 | 38892016 | A           | G  | -- | -- | IGR     | SNP | 0.125 | 21 | 3  |
| --         | chr10 | 38952122 | G           | T  | -- | -- | IGR     | SNP | 0.296 | 19 | 8  |
| --         | chr10 | 38955209 | GA          | -  | -- | -- | IGR     | DEL | 0.118 | 15 | 2  |
| --         | chr10 | 38988631 | A           | G  | -- | -- | IGR     | SNP | 0.238 | 16 | 5  |
| --         | chr10 | 38993396 | -           | TA | -- | -- | IGR     | INS | 0.103 | 26 | 3  |
| --         | chr10 | 38996676 | C           | T  | -- | -- | IGR     | SNP | 0.133 | 26 | 4  |
| --         | chr10 | 38999751 | T           | C  | -- | -- | IGR     | SNP | 0.208 | 19 | 5  |
| --         | chr10 | 38999752 | G           | A  | -- | -- | IGR     | SNP | 0.208 | 19 | 5  |
| --         | chr10 | 39000153 | C           | T  | -- | -- | IGR     | SNP | 0.308 | 9  | 4  |
| --         | chr10 | 39034039 | G           | A  | -- | -- | IGR     | SNP | 0.214 | 11 | 3  |
| --         | chr10 | 39035869 | C           | A  | -- | -- | IGR     | SNP | 0.122 | 36 | 5  |
| --         | chr10 | 39054031 | C           | T  | -- | -- | IGR     | SNP | 0.105 | 34 | 4  |
| --         | chr10 | 39056046 | G           | A  | -- | -- | IGR     | SNP | 0.172 | 24 | 5  |
| --         | chr10 | 39067198 | A           | G  | -- | -- | IGR     | SNP | 0.132 | 33 | 5  |
| --         | chr10 | 42372560 | T           | A  | -- | -- | IGR     | SNP | 0.286 | 35 | 14 |
| --         | chr10 | 42438737 | T           | C  | -- | -- | IGR     | SNP | 0.167 | 15 | 3  |
| --         | chr10 | 42491372 | G           | C  | -- | -- | IGR     | SNP | 0.167 | 30 | 6  |
| --         | chr10 | 42601961 | A           | G  | -- | -- | IGR     | SNP | 0.167 | 40 | 8  |
| --         | chr10 | 42602537 | G           | A  | -- | -- | IGR     | SNP | 0.137 | 44 | 7  |
| --         | chr10 | 42605129 | T           | C  | -- | -- | IGR     | SNP | 0.171 | 29 | 6  |
| --         | chr10 | 42609140 | A           | C  | -- | -- | IGR     | SNP | 0.143 | 30 | 5  |
| --         | chr10 | 42618107 | G           | A  | -- | -- | IGR     | SNP | 0.160 | 21 | 4  |
| --         | chr10 | 42627377 | ACT         | -  | -- | -- | IGR     | DEL | 0.111 | 16 | 2  |
| --         | chr10 | 42627873 | AT          | -  | -- | -- | IGR     | DEL | 0.105 | 68 | 8  |
| --         | chr10 | 42639637 | A           | T  | -- | -- | IGR     | SNP | 0.220 | 32 | 9  |
| --         | chr10 | 42650436 | T           | A  | -- | -- | IGR     | SNP | 0.146 | 41 | 7  |
| --         | chr10 | 42656087 | A           | C  | -- | -- | IGR     | SNP | 0.111 | 48 | 6  |
| --         | chr10 | 42672391 | C           | T  | -- | -- | IGR     | SNP | 0.174 | 19 | 4  |
| --         | chr10 | 42686881 | A           | G  | -- | -- | IGR     | SNP | 0.104 | 43 | 5  |
| --         | chr10 | 42689542 | G           | T  | -- | -- | IGR     | SNP | 0.227 | 34 | 10 |
| --         | chr10 | 42697732 | G           | A  | -- | -- | IGR     | SNP | 0.185 | 22 | 5  |
| --         | chr10 | 42705495 | T           | C  | -- | -- | IGR     | SNP | 0.343 | 23 | 12 |
| --         | chr10 | 42717079 | A           | T  | -- | -- | IGR     | SNP | 0.143 | 18 | 3  |
| --         | chr10 | 42717088 | A           | G  | -- | -- | IGR     | SNP | 0.143 | 18 | 3  |
| --         | chr10 | 42721832 | C           | T  | -- | -- | IGR     | SNP | 0.156 | 38 | 7  |
| --         | chr10 | 42738173 | G           | A  | -- | -- | IGR     | SNP | 0.222 | 21 | 6  |
| --         | chr10 | 42741507 | TG          | -  | -- | -- | IGR     | DEL | 0.133 | 13 | 2  |
| --         | chr10 | 42746987 | C           | A  | -- | -- | IGR     | SNP | 0.104 | 43 | 5  |
| --         | chr10 | 42748987 | G           | T  | -- | -- | IGR     | SNP | 0.174 | 57 | 12 |
| --         | chr10 | 42749228 | AAAT        | -  | -- | -- | IGR     | DEL | 0.111 | 32 | 4  |
| --         | chr10 | 42763631 | CTTCG       | -  | -- | -- | IGR     | DEL | 0.139 | 31 | 5  |
| --         | chr10 | 42764616 | G           | A  | -- | -- | IGR     | SNP | 0.158 | 32 | 6  |
| --         | chr10 | 42770831 | GTCA        | -  | -- | -- | IGR     | DEL | 0.105 | 17 | 2  |
| --         | chr10 | 42770851 | G           | A  | -- | -- | IGR     | SNP | 0.190 | 17 | 4  |
| --         | chr10 | 42909320 | A           | G  | -- | -- | IGR     | SNP | 0.333 | 20 | 10 |
| LOC84856   | chr10 | 42970686 | G           | A  | -- | -- | 5'Flank | SNP | 0.667 | 15 | 30 |
| LOC84856   | chr10 | 42987766 | A           | G  | -- | -- | RNA     | SNP | 0.103 | 35 | 4  |
| LOC84856   | chr10 | 42990845 | G           | C  | -- | -- | 3'Flank | SNP | 0.700 | 12 | 28 |
| BMS1       | chr10 | 43328481 | A           | C  | -- | -- | 3'UTR   | SNP | 0.114 | 31 | 4  |
| BMS1       | chr10 | 43328508 | A           | G  | -- | -- | 3'UTR   | SNP | 0.129 | 27 | 4  |
| --         | chr10 | 43465996 | G           | C  | -- | -- | IGR     | SNP | 0.140 | 37 | 6  |
| --         | chr10 | 43504487 | A           | C  | -- | -- | IGR     | SNP | 0.438 | 9  | 7  |
| --         | chr10 | 43544764 | G           | A  | -- | -- | IGR     | SNP | 0.372 | 27 | 16 |
| CSGALNACT: | chr10 | 43678388 | G           | T  | -- | -- | Intron  | SNP | 0.182 | 18 | 4  |
| ZNF487P    | chr10 | 43975473 | TTTC        | -  | -- | -- | RNA     | DEL | 0.143 | 12 | 2  |
| C10orf136  | chr10 | 44340412 | T           | C  | -- | -- | 5'Flank | SNP | 0.676 | 11 | 23 |
| LOC283033  | chr10 | 44410518 | G           | T  | -- | -- | RNA     | SNP | 0.267 | 11 | 4  |
| LOC283033  | chr10 | 44448943 | C           | G  | -- | -- | RNA     | SNP | 0.342 | 25 | 13 |
| --         | chr10 | 44571792 | C           | T  | -- | -- | IGR     | SNP | 0.323 | 21 | 10 |
| --         | chr10 | 44590683 | A           | T  | -- | -- | IGR     | SNP | 0.500 | 5  | 5  |
| --         | chr10 | 44649078 | T           | A  | -- | -- | IGR     | SNP | 0.325 | 27 | 13 |
| --         | chr10 | 45078279 | G           | T  | -- | -- | IGR     | SNP | 0.250 | 18 | 6  |



|             |       |          |     |        |    |    |        |     |       |    |    |
|-------------|-------|----------|-----|--------|----|----|--------|-----|-------|----|----|
| --          | chr10 | 45080678 | T   | A      | -- | -- | IGR    | SNP | 0.212 | 26 | 7  |
| --          | chr10 | 45108825 | -   | GTA    | -- | -- | IGR    | INS | 0.200 | 23 | 6  |
| --          | chr10 | 45136010 | A   | T      | -- | -- | IGR    | SNP | 0.278 | 26 | 10 |
| --          | chr10 | 45142774 | C   | A      | -- | -- | IGR    | SNP | 0.545 | 5  | 6  |
| --          | chr10 | 45147983 | G   | C      | -- | -- | IGR    | SNP | 0.250 | 21 | 7  |
| --          | chr10 | 45200462 | G   | A      | -- | -- | IGR    | SNP | 0.265 | 25 | 9  |
| --          | chr10 | 45205159 | C   | A      | -- | -- | IGR    | SNP | 0.286 | 10 | 4  |
| LOC220980   | chr10 | 45346431 | G   | T      | -- | -- | RNA    | SNP | 0.244 | 34 | 11 |
| LOC1001333C | chr10 | 45622786 | C   | A      | -- | -- | RNA    | SNP | 0.100 | 36 | 4  |
| --          | chr10 | 47016866 | G   | C      | -- | -- | IGR    | SNP | 0.111 | 24 | 3  |
| --          | chr10 | 47377992 | C   | T      | -- | -- | IGR    | SNP | 0.121 | 29 | 4  |
| FAM35B2     | chr10 | 47397439 | ACT | -      | -- | -- | RNA    | DEL | 0.143 | 18 | 3  |
| ANTXR1      | chr10 | 47698651 | C   | A      | -- | -- | RNA    | SNP | 0.200 | 44 | 11 |
| --          | chr10 | 47996091 | C   | A      | -- | -- | IGR    | SNP | 0.208 | 19 | 5  |
| --          | chr10 | 48659228 | C   | T      | -- | -- | IGR    | SNP | 0.152 | 28 | 5  |
| LOC399753   | chr10 | 49238050 | C   | T      | -- | -- | RNA    | SNP | 0.250 | 9  | 3  |
| --          | chr10 | 49314500 | A   | G      | -- | -- | IGR    | SNP | 0.476 | 11 | 10 |
| FRMPD2      | chr10 | 49419698 | G   | A      | -- | -- | Intron | SNP | 0.185 | 22 | 5  |
| FRMPD2      | chr10 | 49432299 | T   | C      | -- | -- | Intron | SNP | 0.410 | 23 | 16 |
| ARHGAP22    | chr10 | 49724225 | C   | A      | -- | -- | Intron | SNP | 0.441 | 19 | 15 |
| WDFY4       | chr10 | 50090112 | G   | T      | -- | -- | Intron | SNP | 0.130 | 40 | 6  |
| VSTM4       | chr10 | 50238553 | G   | A      | -- | -- | Intron | SNP | 0.604 | 21 | 32 |
| VSTM4       | chr10 | 50314612 | C   | A      | -- | -- | Intron | SNP | 0.268 | 30 | 11 |
| DRGX        | chr10 | 50580135 | C   | T      | -- | -- | Intron | SNP | 0.235 | 26 | 8  |
| DRGX        | chr10 | 50588646 | C   | A      | -- | -- | Intron | SNP | 0.692 | 12 | 27 |
| PARG        | chr10 | 51095853 | A   | G      | -- | -- | Intron | SNP | 0.349 | 28 | 15 |
| AGAP7       | chr10 | 51481776 | -   | TG     | -- | -- | Intron | INS | 0.125 | 14 | 2  |
| --          | chr10 | 51535066 | G   | A      | -- | -- | IGR    | SNP | 0.121 | 29 | 4  |
| --          | chr10 | 51725461 | -   | GATGAA | -- | -- | IGR    | DEL | 0.138 | 25 | 4  |
| --          | chr10 | 52422968 | T   | C      | -- | -- | IGR    | SNP | 0.500 | 10 | 10 |
| A1CF        | chr10 | 52582486 | A   | G      | -- | -- | Intron | SNP | 0.270 | 27 | 10 |
| A1CF        | chr10 | 52586305 | A   | G      | -- | -- | Intron | SNP | 0.273 | 16 | 6  |
| PRKG1       | chr10 | 52943372 | C   | G      | -- | -- | Intron | SNP | 0.242 | 25 | 8  |
| PRKG1       | chr10 | 53051192 | T   | A      | -- | -- | Intron | SNP | 0.238 | 16 | 5  |
| PRKG1       | chr10 | 53115702 | G   | T      | -- | -- | Intron | SNP | 0.185 | 22 | 5  |
| PRKG1       | chr10 | 53116152 | T   | A      | -- | -- | Intron | SNP | 0.147 | 29 | 5  |
| PRKG1       | chr10 | 53154122 | G   | A      | -- | -- | Intron | SNP | 0.583 | 15 | 21 |
| PRKG1       | chr10 | 53212116 | C   | A      | -- | -- | Intron | SNP | 0.192 | 21 | 5  |
| PRKG1       | chr10 | 53243921 | A   | C      | -- | -- | Intron | SNP | 0.167 | 20 | 4  |
| PRKG1       | chr10 | 53570140 | A   | G      | -- | -- | Intron | SNP | 0.233 | 23 | 7  |
| PRKG1       | chr10 | 53594085 | T   | C      | -- | -- | Intron | SNP | 0.212 | 26 | 7  |
| PRKG1       | chr10 | 53756103 | G   | A      | -- | -- | Intron | SNP | 0.211 | 15 | 4  |
| PRKG1       | chr10 | 53777236 | G   | T      | -- | -- | Intron | SNP | 0.294 | 24 | 10 |
| PRKG1       | chr10 | 53834398 | T   | G      | -- | -- | Intron | SNP | 0.231 | 20 | 6  |
| PRKG1       | chr10 | 53945190 | G   | T      | -- | -- | Intron | SNP | 0.296 | 19 | 8  |
| --          | chr10 | 54199435 | T   | G      | -- | -- | IGR    | SNP | 0.323 | 21 | 10 |
| --          | chr10 | 54237352 | G   | C      | -- | -- | IGR    | SNP | 0.231 | 30 | 9  |
| --          | chr10 | 54316939 | GTA | -      | -- | -- | IGR    | DEL | 0.172 | 24 | 5  |
| --          | chr10 | 54415616 | T   | A      | -- | -- | IGR    | SNP | 0.267 | 22 | 8  |
| --          | chr10 | 54490785 | C   | G      | -- | -- | IGR    | SNP | 0.214 | 11 | 3  |
| --          | chr10 | 54535388 | C   | A      | -- | -- | IGR    | SNP | 0.679 | 17 | 36 |
| --          | chr10 | 54602372 | G   | A      | -- | -- | IGR    | SNP | 0.778 | 2  | 7  |
| --          | chr10 | 54618518 | A   | G      | -- | -- | IGR    | SNP | 0.238 | 32 | 10 |
| --          | chr10 | 55143259 | C   | A      | -- | -- | IGR    | SNP | 0.250 | 12 | 4  |
| --          | chr10 | 55454744 | C   | T      | -- | -- | IGR    | SNP | 0.125 | 21 | 3  |
| PCDH15      | chr10 | 55764186 | AC  | -      | -- | -- | Intron | DEL | 0.111 | 16 | 2  |
| PCDH15      | chr10 | 55846289 | C   | A      | -- | -- | Intron | SNP | 0.324 | 23 | 11 |
| PCDH15      | chr10 | 55930552 | G   | A      | -- | -- | Intron | SNP | 0.107 | 25 | 3  |
| PCDH15      | chr10 | 56068751 | C   | T      | -- | -- | Intron | SNP | 0.212 | 26 | 7  |
| PCDH15      | chr10 | 56154216 | C   | A      | -- | -- | Intron | SNP | 0.167 | 20 | 4  |
| PCDH15      | chr10 | 56162830 | C   | A      | -- | -- | Intron | SNP | 0.170 | 39 | 8  |
| PCDH15      | chr10 | 56253801 | A   | T      | -- | -- | Intron | SNP | 0.182 | 18 | 4  |
| PCDH15      | chr10 | 56377545 | G   | A      | -- | -- | Intron | SNP | 0.500 | 13 | 13 |
| PCDH15      | chr10 | 56390388 | A   | C      | -- | -- | Intron | SNP | 0.333 | 18 | 9  |
| PCDH15      | chr10 | 56411985 | C   | G      | -- | -- | Intron | SNP | 0.231 | 20 | 6  |
| PCDH15      | chr10 | 56417380 | A   | T      | -- | -- | Intron | SNP | 0.667 | 13 | 26 |
| --          | chr10 | 56730656 | -   | TA     | -- | -- | IGR    | INS | 0.226 | 24 | 7  |
| --          | chr10 | 56759795 | A   | C      | -- | -- | IGR    | SNP | 0.152 | 28 | 5  |
| --          | chr10 | 56759808 | G   | A      | -- | -- | IGR    | SNP | 0.139 | 31 | 5  |
| --          | chr10 | 56760042 | AT  | -      | -- | -- | IGR    | DEL | 0.132 | 33 | 5  |
| --          | chr10 | 57035967 | C   | G      | -- | -- | IGR    | SNP | 0.769 | 3  | 10 |
| --          | chr10 | 57084921 | G   | C      | -- | -- | IGR    | SNP | 0.743 | 9  | 26 |
| --          | chr10 | 57235109 | T   | C      | -- | -- | IGR    | SNP | 0.240 | 19 | 6  |
| --          | chr10 | 57345665 | C   | G      | -- | -- | IGR    | SNP | 0.242 | 25 | 8  |
| --          | chr10 | 57388850 | GT  | -      | -- | -- | IGR    | DEL | 0.341 | 27 | 14 |
| --          | chr10 | 57448430 | C   | T      | -- | -- | IGR    | SNP | 0.500 | 4  | 4  |
| --          | chr10 | 57486512 | G   | C      | -- | -- | IGR    | SNP | 0.158 | 16 | 3  |
| --          | chr10 | 57487786 | A   | G      | -- | -- | IGR    | SNP | 0.250 | 18 | 6  |
| --          | chr10 | 57708496 | G   | A      | -- | -- | IGR    | SNP | 0.250 | 9  | 3  |
| --          | chr10 | 57905125 | G   | A      | -- | -- | IGR    | SNP | 0.276 | 21 | 8  |

|                   |       |          |      |    |    |    |        |     |       |    |    |
|-------------------|-------|----------|------|----|----|----|--------|-----|-------|----|----|
| --                | chr10 | 57911026 | C    | G  | -- | -- | IGR    | SNP | 0.567 | 13 | 17 |
| --                | chr10 | 58154568 | T    | A  | -- | -- | IGR    | SNP | 0.294 | 12 | 5  |
| --                | chr10 | 58527128 | T    | A  | -- | -- | IGR    | SNP | 0.222 | 28 | 8  |
| --                | chr10 | 58659872 | G    | A  | -- | -- | IGR    | SNP | 0.633 | 11 | 19 |
| --                | chr10 | 59444276 | T    | A  | -- | -- | IGR    | SNP | 0.231 | 30 | 9  |
| --                | chr10 | 59453681 | ATG  | -  | -- | -- | IGR    | DEL | 0.107 | 25 | 3  |
| --                | chr10 | 59516547 | G    | C  | -- | -- | IGR    | SNP | 0.619 | 16 | 26 |
| --                | chr10 | 59658322 | G    | A  | -- | -- | IGR    | SNP | 0.438 | 18 | 14 |
| --                | chr10 | 59813985 | T    | A  | -- | -- | IGR    | SNP | 0.226 | 24 | 7  |
| --                | chr10 | 59884499 | T    | C  | -- | -- | IGR    | SNP | 0.321 | 19 | 9  |
| <i>IPMK</i>       | chr10 | 60004072 | CA   | -  | -- | -- | Intron | DEL | 0.111 | 16 | 2  |
| <i>BICC1</i>      | chr10 | 60352326 | A    | T  | -- | -- | Intron | SNP | 0.176 | 14 | 3  |
| <i>BICC1</i>      | chr10 | 60444799 | A    | G  | -- | -- | Intron | SNP | 0.286 | 15 | 6  |
| --                | chr10 | 60594273 | C    | G  | -- | -- | IGR    | SNP | 0.571 | 15 | 20 |
| --                | chr10 | 60680528 | T    | A  | -- | -- | IGR    | SNP | 0.143 | 24 | 4  |
| --                | chr10 | 60872697 | A    | G  | -- | -- | IGR    | SNP | 0.263 | 14 | 5  |
| --                | chr10 | 60924657 | T    | A  | -- | -- | IGR    | SNP | 0.485 | 17 | 16 |
| <i>PHYHIPL</i>    | chr10 | 61004354 | C    | A  | -- | -- | Intron | SNP | 0.308 | 9  | 4  |
| <i>SLC16A9</i>    | chr10 | 61462619 | G    | C  | -- | -- | Intron | SNP | 0.135 | 32 | 5  |
| --                | chr10 | 61708648 | G    | A  | -- | -- | IGR    | SNP | 0.324 | 23 | 11 |
| --                | chr10 | 61765439 | C    | G  | -- | -- | IGR    | SNP | 0.190 | 34 | 8  |
| <i>ANK3</i>       | chr10 | 62166113 | G    | A  | -- | -- | Intron | SNP | 0.231 | 30 | 9  |
| --                | chr10 | 62764763 | G    | C  | -- | -- | IGR    | SNP | 0.316 | 13 | 6  |
| --                | chr10 | 63119800 | C    | A  | -- | -- | IGR    | SNP | 0.357 | 27 | 15 |
| --                | chr10 | 63122062 | G    | C  | -- | -- | IGR    | SNP | 0.273 | 32 | 12 |
| --                | chr10 | 63238224 | G    | A  | -- | -- | IGR    | SNP | 0.652 | 8  | 15 |
| --                | chr10 | 63261359 | C    | A  | -- | -- | IGR    | SNP | 0.179 | 32 | 7  |
| --                | chr10 | 63393666 | C    | A  | -- | -- | IGR    | SNP | 0.200 | 24 | 6  |
| --                | chr10 | 63393667 | A    | T  | -- | -- | IGR    | SNP | 0.200 | 24 | 6  |
| --                | chr10 | 63615377 | G    | T  | -- | -- | IGR    | SNP | 0.227 | 17 | 5  |
| --                | chr10 | 64063890 | C    | G  | -- | -- | IGR    | SNP | 0.300 | 21 | 9  |
| <i>ZNF365</i>     | chr10 | 64252821 | C    | A  | -- | -- | Intron | SNP | 0.148 | 23 | 4  |
| --                | chr10 | 64434034 | T    | C  | -- | -- | IGR    | SNP | 0.167 | 15 | 3  |
| --                | chr10 | 64483235 | C    | A  | -- | -- | IGR    | SNP | 0.231 | 30 | 9  |
| --                | chr10 | 64616494 | A    | T  | -- | -- | IGR    | SNP | 0.296 | 19 | 8  |
| --                | chr10 | 64687004 | -    | AT | -- | -- | IGR    | INS | 0.316 | 26 | 12 |
| --                | chr10 | 64767193 | A    | C  | -- | -- | IGR    | SNP | 0.315 | 37 | 17 |
| <i>JMJD1C</i>     | chr10 | 65008461 | A    | G  | -- | -- | Intron | SNP | 0.367 | 19 | 11 |
| --                | chr10 | 65408989 | C    | A  | -- | -- | IGR    | SNP | 0.235 | 13 | 4  |
| --                | chr10 | 65432848 | C    | A  | -- | -- | IGR    | SNP | 0.571 | 21 | 28 |
| --                | chr10 | 65671868 | G    | C  | -- | -- | IGR    | SNP | 0.244 | 31 | 10 |
| --                | chr10 | 66393572 | G    | A  | -- | -- | IGR    | SNP | 0.286 | 10 | 4  |
| --                | chr10 | 66558392 | A    | C  | -- | -- | IGR    | SNP | 0.400 | 18 | 12 |
| --                | chr10 | 66722345 | T    | A  | -- | -- | IGR    | SNP | 0.120 | 22 | 3  |
| --                | chr10 | 66843358 | G    | A  | -- | -- | IGR    | SNP | 0.327 | 35 | 17 |
| --                | chr10 | 66972594 | A    | G  | -- | -- | IGR    | SNP | 0.333 | 12 | 6  |
| --                | chr10 | 66988404 | G    | C  | -- | -- | IGR    | SNP | 0.757 | 9  | 28 |
| --                | chr10 | 67342143 | A    | T  | -- | -- | IGR    | SNP | 0.259 | 20 | 7  |
| --                | chr10 | 67524725 | G    | T  | -- | -- | IGR    | SNP | 0.353 | 22 | 12 |
| --                | chr10 | 67598630 | C    | G  | -- | -- | IGR    | SNP | 0.135 | 32 | 5  |
| --                | chr10 | 67645652 | A    | T  | -- | -- | IGR    | SNP | 0.233 | 23 | 7  |
| --                | chr10 | 67669698 | T    | G  | -- | -- | IGR    | SNP | 0.243 | 28 | 9  |
| --                | chr10 | 67669990 | A    | C  | -- | -- | IGR    | SNP | 0.189 | 30 | 7  |
| <i>CTNNA3</i>     | chr10 | 67808467 | C    | G  | -- | -- | Intron | SNP | 0.143 | 18 | 3  |
| <i>CTNNA3</i>     | chr10 | 67923269 | A    | G  | -- | -- | Intron | SNP | 0.345 | 19 | 10 |
| <i>CTNNA3</i>     | chr10 | 67923270 | G    | T  | -- | -- | Intron | SNP | 0.345 | 19 | 10 |
| <i>CTNNA3</i>     | chr10 | 67950111 | G    | T  | -- | -- | Intron | SNP | 0.104 | 43 | 5  |
| <i>CTNNA3</i>     | chr10 | 68054144 | C    | A  | -- | -- | Intron | SNP | 0.690 | 9  | 20 |
| <i>CTNNA3</i>     | chr10 | 68055935 | G    | A  | -- | -- | Intron | SNP | 0.259 | 20 | 7  |
| <i>CTNNA3</i>     | chr10 | 68241219 | C    | T  | -- | -- | Intron | SNP | 0.571 | 3  | 4  |
| <i>CTNNA3</i>     | chr10 | 68612018 | T    | G  | -- | -- | Intron | SNP | 0.257 | 26 | 9  |
| <i>CTNNA3</i>     | chr10 | 68612019 | G    | T  | -- | -- | Intron | SNP | 0.257 | 26 | 9  |
| <i>CTNNA3</i>     | chr10 | 68662421 | G    | T  | -- | -- | Intron | SNP | 0.429 | 12 | 9  |
| <i>CTNNA3,LRR</i> | chr10 | 68763466 | G    | T  | -- | -- | Intron | SNP | 0.676 | 11 | 23 |
| <i>CTNNA3,LRR</i> | chr10 | 68784891 | AAAC | -  | -- | -- | Intron | DEL | 0.133 | 13 | 2  |
| <i>CTNNA3</i>     | chr10 | 69014333 | A    | G  | -- | -- | Intron | SNP | 0.136 | 38 | 6  |
| <i>CTNNA3</i>     | chr10 | 69398511 | A    | T  | -- | -- | Intron | SNP | 0.353 | 11 | 6  |
| <i>MYPN</i>       | chr10 | 69876470 | G    | C  | -- | -- | Intron | SNP | 0.364 | 14 | 8  |
| <i>MYPN</i>       | chr10 | 69949303 | C    | A  | -- | -- | Intron | SNP | 0.174 | 38 | 8  |
| <i>MYPN</i>       | chr10 | 69949304 | A    | C  | -- | -- | Intron | SNP | 0.170 | 39 | 8  |
| --                | chr10 | 70025592 | C    | T  | -- | -- | IGR    | SNP | 0.304 | 16 | 7  |
| <i>TET1</i>       | chr10 | 70339671 | T    | G  | -- | -- | Intron | SNP | 0.550 | 9  | 11 |
| --                | chr10 | 70470928 | C    | A  | -- | -- | IGR    | SNP | 0.316 | 13 | 6  |
| --                | chr10 | 70826872 | G    | A  | -- | -- | IGR    | SNP | 0.222 | 14 | 4  |
| <i>HKDC1</i>      | chr10 | 71002207 | C    | A  | -- | -- | Intron | SNP | 0.200 | 16 | 4  |
| <i>HK1</i>        | chr10 | 71062464 | A    | T  | -- | -- | Intron | SNP | 0.235 | 13 | 4  |
| <i>HK1</i>        | chr10 | 71119808 | C    | T  | -- | -- | Intron | SNP | 0.103 | 26 | 3  |
| <i>HK1</i>        | chr10 | 71120604 | C    | T  | -- | -- | Intron | SNP | 0.250 | 39 | 13 |
| <i>HK1</i>        | chr10 | 71121410 | C    | G  | -- | -- | Intron | SNP | 0.133 | 39 | 6  |
| <i>HK1</i>        | chr10 | 71121607 | C    | G  | -- | -- | Intron | SNP | 0.233 | 33 | 10 |

|              |       |          |       |      |    |    |         |     |       |    |    |
|--------------|-------|----------|-------|------|----|----|---------|-----|-------|----|----|
| HK1          | chr10 | 71121658 | C     | G    | -- | -- | Intron  | SNP | 0.250 | 36 | 12 |
| HK1          | chr10 | 71128439 | G     | T    | -- | -- | Intron  | SNP | 0.161 | 47 | 9  |
| H2AFY2       | chr10 | 71827940 | C     | G    | -- | -- | Intron  | SNP | 0.222 | 35 | 10 |
| --           | chr10 | 72152107 | A     | C    | -- | -- | IGR     | SNP | 0.385 | 8  | 5  |
| --           | chr10 | 72556468 | A     | T    | -- | -- | IGR     | SNP | 0.114 | 31 | 4  |
| SGPL1        | chr10 | 72614041 | C     | T    | -- | -- | Intron  | SNP | 0.286 | 30 | 12 |
| --           | chr10 | 72710085 | -     | CT   | -- | -- | IGR     | INS | 0.184 | 31 | 7  |
| CDH23        | chr10 | 73163145 | -     | TC   | -- | -- | Intron  | INS | 0.118 | 15 | 2  |
| CDH23        | chr10 | 73241511 | A     | G    | -- | -- | Intron  | SNP | 0.186 | 35 | 8  |
| SPOCK2       | chr10 | 73847422 | C     | G    | -- | -- | Intron  | SNP | 0.364 | 7  | 4  |
| MIR1256      | chr10 | 74290217 | G     | A    | -- | -- | RNA     | SNP | 0.333 | 6  | 3  |
| OIT3         | chr10 | 74661748 | G     | C    | -- | -- | Intron  | SNP | 0.667 | 11 | 22 |
| P4HA1        | chr10 | 74768932 | G     | A    | -- | -- | Intron  | SNP | 0.194 | 29 | 7  |
| FAM149B1     | chr10 | 74931405 | G     | T    | -- | -- | Intron  | SNP | 0.167 | 20 | 4  |
| TTC18        | chr10 | 75090644 | G     | A    | -- | -- | Intron  | SNP | 0.406 | 19 | 13 |
| PPP3CB       | chr10 | 75241229 | AAT   | -    | -- | -- | Intron  | DEL | 0.133 | 13 | 2  |
| USP54        | chr10 | 75320814 | G     | A    | -- | -- | Intron  | SNP | 0.600 | 8  | 12 |
| SYNPO2L      | chr10 | 75416703 | A     | C    | -- | -- | 5'Flank | SNP | 0.269 | 19 | 7  |
| --           | chr10 | 75638855 | C     | A    | -- | -- | IGR     | SNP | 0.472 | 19 | 17 |
| C10orf55,PLA | chr10 | 75673273 | G     | A    | -- | -- | Intron  | SNP | 0.130 | 47 | 7  |
| --           | chr10 | 75690836 | G     | C    | -- | -- | IGR     | SNP | 0.114 | 39 | 5  |
| ADK          | chr10 | 76230507 | C     | G    | -- | -- | Intron  | SNP | 0.394 | 20 | 13 |
| ADK          | chr10 | 76433276 | G     | A    | -- | -- | Intron  | SNP | 0.148 | 46 | 8  |
| --           | chr10 | 77263790 | G     | T    | -- | -- | IGR     | SNP | 0.148 | 23 | 4  |
| --           | chr10 | 77286631 | C     | A    | -- | -- | IGR     | SNP | 0.115 | 23 | 3  |
| --           | chr10 | 77524727 | T     | G    | -- | -- | IGR     | SNP | 0.160 | 21 | 4  |
| C10orf11     | chr10 | 77583076 | C     | A    | -- | -- | Intron  | SNP | 0.561 | 25 | 32 |
| C10orf11     | chr10 | 77961904 | A     | G    | -- | -- | Intron  | SNP | 0.314 | 24 | 11 |
| C10orf11     | chr10 | 77982374 | -     | AAAC | -- | -- | Intron  | INS | 0.111 | 16 | 2  |
| C10orf11     | chr10 | 77999889 | A     | C    | -- | -- | Intron  | SNP | 0.370 | 17 | 10 |
| C10orf11     | chr10 | 78030161 | C     | T    | -- | -- | Intron  | SNP | 0.167 | 35 | 7  |
| C10orf11     | chr10 | 78222916 | C     | T    | -- | -- | Intron  | SNP | 0.512 | 20 | 21 |
| --           | chr10 | 78566452 | TGTGC | -    | -- | -- | IGR     | DEL | 0.121 | 29 | 4  |
| KCNMA1       | chr10 | 79003698 | C     | A    | -- | -- | Intron  | SNP | 0.167 | 30 | 6  |
| KCNMA1       | chr10 | 79034951 | G     | A    | -- | -- | Intron  | SNP | 0.605 | 17 | 26 |
| KCNMA1       | chr10 | 79054948 | A     | T    | -- | -- | Intron  | SNP | 0.290 | 22 | 9  |
| POLR3A       | chr10 | 79758892 | C     | A    | -- | -- | Intron  | SNP | 0.313 | 11 | 5  |
| --           | chr10 | 80000659 | C     | A    | -- | -- | IGR     | SNP | 0.636 | 8  | 14 |
| --           | chr10 | 80022663 | C     | G    | -- | -- | IGR     | SNP | 0.220 | 32 | 9  |
| --           | chr10 | 80104823 | A     | T    | -- | -- | IGR     | SNP | 0.222 | 28 | 8  |
| --           | chr10 | 80136426 | T     | A    | -- | -- | IGR     | SNP | 0.143 | 42 | 7  |
| --           | chr10 | 81241417 | G     | T    | -- | -- | IGR     | SNP | 0.341 | 27 | 14 |
| --           | chr10 | 81310126 | C     | G    | -- | -- | IGR     | SNP | 0.279 | 44 | 17 |
| --           | chr10 | 81394008 | T     | A    | -- | -- | IGR     | SNP | 0.107 | 25 | 3  |
| --           | chr10 | 81395642 | C     | T    | -- | -- | IGR     | SNP | 0.139 | 31 | 5  |
| --           | chr10 | 81597018 | G     | C    | -- | -- | IGR     | SNP | 0.300 | 14 | 6  |
| --           | chr10 | 81598111 | C     | T    | -- | -- | IGR     | SNP | 0.235 | 13 | 4  |
| LOC10028897  | chr10 | 81691904 | C     | A    | -- | -- | 3'Flank | SNP | 0.176 | 28 | 6  |
| --           | chr10 | 81752241 | G     | A    | -- | -- | IGR     | SNP | 0.172 | 24 | 5  |
| TSPAN14      | chr10 | 82244226 | CA    | -    | -- | -- | Intron  | DEL | 0.595 | 17 | 25 |
| --           | chr10 | 82293381 | G     | A    | -- | -- | IGR     | SNP | 0.235 | 13 | 4  |
| --           | chr10 | 82742459 | GTA   | -    | -- | -- | IGR     | DEL | 0.167 | 20 | 4  |
| --           | chr10 | 82916999 | GAT   | -    | -- | -- | IGR     | DEL | 0.105 | 17 | 2  |
| --           | chr10 | 82958077 | C     | T    | -- | -- | IGR     | SNP | 0.444 | 10 | 8  |
| --           | chr10 | 83243603 | C     | A    | -- | -- | IGR     | SNP | 0.700 | 6  | 14 |
| --           | chr10 | 83407566 | G     | A    | -- | -- | IGR     | SNP | 0.194 | 29 | 7  |
| NRG3         | chr10 | 83701934 | C     | A    | -- | -- | Intron  | SNP | 0.310 | 20 | 9  |
| NRG3         | chr10 | 83723039 | G     | A    | -- | -- | Intron  | SNP | 0.714 | 6  | 15 |
| NRG3         | chr10 | 83863450 | C     | T    | -- | -- | Intron  | SNP | 0.233 | 23 | 7  |
| NRG3         | chr10 | 83951442 | A     | G    | -- | -- | Intron  | SNP | 0.184 | 31 | 7  |
| NRG3         | chr10 | 84000772 | A     | G    | -- | -- | Intron  | SNP | 0.231 | 20 | 6  |
| NRG3         | chr10 | 84082728 | G     | T    | -- | -- | Intron  | SNP | 0.290 | 22 | 9  |
| NRG3         | chr10 | 84213183 | G     | C    | -- | -- | Intron  | SNP | 0.129 | 27 | 4  |
| NRG3         | chr10 | 84319226 | G     | A    | -- | -- | Intron  | SNP | 0.229 | 27 | 8  |
| NRG3         | chr10 | 84401024 | G     | C    | -- | -- | Intron  | SNP | 0.368 | 12 | 7  |
| NRG3         | chr10 | 84447196 | G     | C    | -- | -- | Intron  | SNP | 0.242 | 25 | 8  |
| --           | chr10 | 84882073 | C     | T    | -- | -- | IGR     | SNP | 0.184 | 31 | 7  |
| --           | chr10 | 85030577 | G     | A    | -- | -- | IGR     | SNP | 0.579 | 16 | 22 |
| --           | chr10 | 85142218 | C     | A    | -- | -- | IGR     | SNP | 0.321 | 19 | 9  |
| --           | chr10 | 85158928 | A     | T    | -- | -- | IGR     | SNP | 0.478 | 12 | 11 |
| --           | chr10 | 85167802 | G     | A    | -- | -- | IGR     | SNP | 0.259 | 20 | 7  |
| --           | chr10 | 85250100 | T     | C    | -- | -- | IGR     | SNP | 0.382 | 21 | 13 |
| --           | chr10 | 85280381 | C     | T    | -- | -- | IGR     | SNP | 0.200 | 16 | 4  |
| --           | chr10 | 85280587 | C     | T    | -- | -- | IGR     | SNP | 0.176 | 14 | 3  |
| --           | chr10 | 85310559 | C     | T    | -- | -- | IGR     | SNP | 0.467 | 8  | 7  |
| --           | chr10 | 85569062 | A     | T    | -- | -- | IGR     | SNP | 0.500 | 16 | 16 |
| --           | chr10 | 85624085 | GAA   | -    | -- | -- | IGR     | DEL | 0.125 | 14 | 2  |
| --           | chr10 | 85855906 | G     | T    | -- | -- | IGR     | SNP | 0.595 | 17 | 25 |
| --           | chr10 | 85892169 | C     | T    | -- | -- | IGR     | SNP | 0.481 | 27 | 25 |
| --           | chr10 | 86075177 | G     | A    | -- | -- | IGR     | SNP | 0.500 | 4  | 4  |

|             |       |           |     |    |       |      |        |     |       |    |    |
|-------------|-------|-----------|-----|----|-------|------|--------|-----|-------|----|----|
| --          | chr10 | 86540474  | C   | T  | --    | --   | IGR    | SNP | 0.200 | 16 | 4  |
| --          | chr10 | 86553799  | T   | C  | --    | --   | IGR    | SNP | 0.140 | 37 | 6  |
| --          | chr10 | 86589091  | T   | C  | --    | --   | IGR    | SNP | 0.227 | 17 | 5  |
| --          | chr10 | 86661004  | C   | G  | --    | --   | IGR    | SNP | 0.684 | 12 | 26 |
| --          | chr10 | 86725894  | -   | GC | --    | --   | IGR    | INS | 0.103 | 35 | 4  |
| --          | chr10 | 86735296  | C   | T  | --    | --   | IGR    | SNP | 0.333 | 24 | 12 |
| --          | chr10 | 86779009  | G   | A  | --    | --   | IGR    | SNP | 0.300 | 21 | 9  |
| --          | chr10 | 86864198  | A   | T  | --    | --   | IGR    | SNP | 0.289 | 27 | 11 |
| --          | chr10 | 86992862  | G   | T  | --    | --   | IGR    | SNP | 0.257 | 26 | 9  |
| --          | chr10 | 86992863  | A   | T  | --    | --   | IGR    | SNP | 0.265 | 25 | 9  |
| --          | chr10 | 86997049  | G   | A  | --    | --   | IGR    | SNP | 0.407 | 16 | 11 |
| --          | chr10 | 87262502  | C   | T  | --    | --   | IGR    | SNP | 0.444 | 5  | 4  |
| LOC10050747 | chr10 | 87346647  | C   | A  | --    | --   | RNA    | SNP | 0.167 | 15 | 3  |
| GRID1       | chr10 | 87539418  | G   | C  | --    | --   | Intron | SNP | 0.120 | 44 | 6  |
| GRID1       | chr10 | 87741019  | C   | T  | --    | --   | Intron | SNP | 0.213 | 37 | 10 |
| GRID1       | chr10 | 87741962  | A   | T  | --    | --   | Intron | SNP | 0.222 | 21 | 6  |
| GRID1       | chr10 | 87867529  | G   | A  | --    | --   | Intron | SNP | 0.236 | 42 | 13 |
| --          | chr10 | 88345729  | G   | A  | --    | --   | IGR    | SNP | 0.255 | 35 | 12 |
| --          | chr10 | 88378230  | G   | C  | --    | --   | IGR    | SNP | 0.556 | 4  | 5  |
| --          | chr10 | 88802491  | T   | C  | --    | --   | IGR    | SNP | 0.667 | 13 | 26 |
| GLUD1       | chr10 | 88838256  | C   | A  | --    | --   | Intron | SNP | 0.406 | 19 | 13 |
| --          | chr10 | 89143866  | GTA | -  | --    | --   | IGR    | DEL | 0.211 | 15 | 4  |
| PAPSS2      | chr10 | 89436717  | G   | A  | --    | --   | Intron | SNP | 0.240 | 19 | 6  |
| ATAD1       | chr10 | 89517954  | TA  | -  | --    | --   | Intron | DEL | 0.303 | 23 | 10 |
| RNLS        | chr10 | 90046519  | T   | C  | --    | --   | Intron | SNP | 0.259 | 20 | 7  |
| RNLS        | chr10 | 90206956  | T   | A  | --    | --   | Intron | SNP | 0.120 | 22 | 3  |
| RNLS        | chr10 | 90207182  | -   | TA | --    | --   | Intron | INS | 0.125 | 21 | 3  |
| FAS         | chr10 | 90772063  | CT  | -  | --    | --   | Intron | DEL | 0.273 | 24 | 9  |
| --          | chr10 | 90947701  | T   | A  | --    | --   | IGR    | SNP | 0.130 | 20 | 3  |
| --          | chr10 | 91437969  | T   | C  | --    | --   | IGR    | SNP | 0.290 | 22 | 9  |
| --          | chr10 | 91828156  | TTC | -  | --    | --   | IGR    | DEL | 0.357 | 9  | 5  |
| --          | chr10 | 91842706  | T   | G  | --    | --   | IGR    | SNP | 0.172 | 24 | 5  |
| --          | chr10 | 91842708  | A   | G  | --    | --   | IGR    | SNP | 0.172 | 24 | 5  |
| --          | chr10 | 92047508  | G   | T  | --    | --   | IGR    | SNP | 0.200 | 28 | 7  |
| --          | chr10 | 92390162  | G   | A  | --    | --   | IGR    | SNP | 0.625 | 9  | 15 |
| --          | chr10 | 92458007  | C   | G  | --    | --   | IGR    | SNP | 0.182 | 27 | 6  |
| PCGF5       | chr10 | 93000302  | C   | T  | C174T | N58N | Silent | SNP | 0.444 | 10 | 8  |
| LOC10018894 | chr10 | 93187813  | A   | T  | --    | --   | RNA    | SNP | 0.211 | 15 | 4  |
| LOC10018894 | chr10 | 93368963  | A   | T  | --    | --   | RNA    | SNP | 0.200 | 20 | 5  |
| BTA1        | chr10 | 93726883  | G   | T  | --    | --   | Intron | SNP | 0.500 | 18 | 18 |
| CPEB3       | chr10 | 93968488  | C   | T  | --    | --   | Intron | SNP | 0.195 | 33 | 8  |
| CPEB3       | chr10 | 93986706  | G   | A  | --    | --   | Intron | SNP | 0.700 | 6  | 14 |
| --          | chr10 | 94426621  | G   | T  | --    | --   | IGR    | SNP | 0.222 | 35 | 10 |
| EXOC6       | chr10 | 94597982  | C   | G  | --    | --   | Intron | SNP | 0.234 | 49 | 15 |
| EXOC6       | chr10 | 94706900  | G   | T  | --    | --   | Intron | SNP | 0.308 | 27 | 12 |
| EXOC6       | chr10 | 94786558  | G   | A  | --    | --   | Intron | SNP | 0.135 | 32 | 5  |
| EXOC6       | chr10 | 94798765  | GTA | -  | --    | --   | Intron | DEL | 0.136 | 19 | 3  |
| --          | chr10 | 95017589  | G   | A  | --    | --   | IGR    | SNP | 0.310 | 20 | 9  |
| MYOF        | chr10 | 95125502  | C   | T  | --    | --   | Intron | SNP | 0.209 | 34 | 9  |
| MYOF        | chr10 | 95184714  | G   | T  | --    | --   | Intron | SNP | 0.333 | 8  | 4  |
| PLCE1       | chr10 | 95923922  | A   | G  | --    | --   | Intron | SNP | 0.250 | 9  | 3  |
| PLCE1       | chr10 | 96074489  | A   | T  | --    | --   | Intron | SNP | 0.222 | 35 | 10 |
| TBC1D12     | chr10 | 96273796  | C   | A  | --    | --   | Intron | SNP | 0.182 | 18 | 4  |
| --          | chr10 | 96374307  | T   | C  | --    | --   | IGR    | SNP | 0.267 | 22 | 8  |
| CYP2C18     | chr10 | 96482263  | G   | C  | --    | --   | Intron | SNP | 0.560 | 11 | 14 |
| CYP2C19     | chr10 | 96588649  | G   | A  | --    | --   | Intron | SNP | 0.444 | 5  | 4  |
| CYP2C19     | chr10 | 96588655  | G   | T  | --    | --   | Intron | SNP | 0.545 | 5  | 6  |
| --          | chr10 | 96614243  | G   | A  | --    | --   | IGR    | SNP | 0.385 | 24 | 15 |
| CYP2C8      | chr10 | 96799411  | G   | C  | --    | --   | Intron | SNP | 0.750 | 6  | 18 |
| CYP2C8      | chr10 | 96819131  | T   | G  | --    | --   | Intron | SNP | 0.200 | 12 | 3  |
| SORBS1      | chr10 | 97258570  | G   | A  | --    | --   | Intron | SNP | 0.176 | 28 | 6  |
| SORBS1      | chr10 | 97269387  | AG  | -  | --    | --   | Intron | DEL | 0.115 | 23 | 3  |
| SORBS1      | chr10 | 97310492  | C   | T  | --    | --   | Intron | SNP | 0.190 | 51 | 12 |
| ALDH18A1    | chr10 | 97383173  | T   | C  | --    | --   | Intron | SNP | 0.103 | 26 | 3  |
| ENTPD1      | chr10 | 97472792  | A   | T  | --    | --   | Intron | SNP | 0.158 | 16 | 3  |
| LOC728558   | chr10 | 97562059  | G   | A  | --    | --   | RNA    | SNP | 0.571 | 9  | 12 |
| TLL2        | chr10 | 98136864  | T   | G  | --    | --   | Intron | SNP | 0.108 | 33 | 4  |
| PIK3AP1     | chr10 | 98467142  | C   | T  | --    | --   | Intron | SNP | 0.306 | 25 | 11 |
| PIK3AP1     | chr10 | 98479867  | C   | A  | --    | --   | Intron | SNP | 0.111 | 24 | 3  |
| SLIT1       | chr10 | 98760319  | C   | G  | --    | --   | 3'UTR  | SNP | 0.310 | 20 | 9  |
| SLIT1       | chr10 | 98784865  | A   | T  | --    | --   | Intron | SNP | 0.115 | 23 | 3  |
| --          | chr10 | 99103424  | T   | A  | --    | --   | IGR    | SNP | 0.286 | 15 | 6  |
| --          | chr10 | 99165774  | G   | A  | --    | --   | IGR    | SNP | 0.632 | 14 | 24 |
| MMS19       | chr10 | 99228245  | G   | A  | --    | --   | Intron | SNP | 0.750 | 12 | 36 |
| LOXL4       | chr10 | 100017028 | G   | A  | --    | --   | Intron | SNP | 0.236 | 42 | 13 |
| HPSE2       | chr10 | 100300942 | C   | G  | --    | --   | Intron | SNP | 0.583 | 10 | 14 |
| HPSE2       | chr10 | 100363901 | G   | A  | --    | --   | Intron | SNP | 0.444 | 20 | 16 |
| HPSE2       | chr10 | 100510013 | G   | A  | --    | --   | Intron | SNP | 0.423 | 15 | 11 |
| HPSE2       | chr10 | 100602283 | G   | T  | --    | --   | Intron | SNP | 0.211 | 15 | 4  |
| HPSE2       | chr10 | 100602701 | G   | C  | --    | --   | Intron | SNP | 0.160 | 21 | 4  |

|          |       |           |      |     |        |       |         |     |       |    |    |
|----------|-------|-----------|------|-----|--------|-------|---------|-----|-------|----|----|
| HPSE2    | chr10 | 100764482 | T    | C   | --     | --    | Intron  | SNP | 0.600 | 10 | 15 |
| --       | chr10 | 101015320 | T    | C   | --     | --    | IGR     | SNP | 0.132 | 33 | 5  |
| --       | chr10 | 101382691 | C    | T   | --     | --    | IGR     | SNP | 0.680 | 16 | 34 |
| --       | chr10 | 101398832 | -    | GAT | --     | --    | IGR     | INS | 0.333 | 14 | 7  |
| ABCC2    | chr10 | 101585256 | C    | T   | --     | --    | Intron  | SNP | 0.125 | 21 | 3  |
| DNMBP    | chr10 | 101722607 | TG   | -   | --     | --    | Intron  | DEL | 0.111 | 24 | 3  |
| DNMBP    | chr10 | 101722619 | TC   | -   | --     | --    | Intron  | DEL | 0.111 | 24 | 3  |
| CWF19L1  | chr10 | 102011955 | T    | A   | --     | --    | Intron  | SNP | 0.182 | 27 | 6  |
| --       | chr10 | 102129711 | A    | G   | --     | --    | IGR     | SNP | 0.217 | 18 | 5  |
| HIF1AN   | chr10 | 102301190 | T    | C   | --     | --    | Intron  | SNP | 0.209 | 34 | 9  |
| HIF1AN   | chr10 | 102313746 | C    | T   | --     | --    | 3'Flank | SNP | 0.270 | 27 | 10 |
| HIF1AN   | chr10 | 102313876 | C    | A   | --     | --    | 3'Flank | SNP | 0.300 | 21 | 9  |
| --       | chr10 | 102328691 | G    | A   | --     | --    | IGR     | SNP | 0.265 | 36 | 13 |
| --       | chr10 | 102365177 | C    | T   | --     | --    | IGR     | SNP | 0.333 | 18 | 9  |
| --       | chr10 | 102410935 | T    | C   | --     | --    | IGR     | SNP | 0.308 | 9  | 4  |
| --       | chr10 | 102452508 | T    | A   | --     | --    | IGR     | SNP | 0.174 | 19 | 4  |
| --       | chr10 | 102646013 | G    | A   | --     | --    | IGR     | SNP | 0.182 | 27 | 6  |
| PDZD7    | chr10 | 102770624 | G    | A   | C2022T | F674F | Silent  | SNP | 0.581 | 13 | 18 |
| --       | chr10 | 103336090 | G    | T   | --     | --    | IGR     | SNP | 0.250 | 12 | 4  |
| FBXW4    | chr10 | 103374029 | G    | C   | --     | --    | Intron  | SNP | 0.692 | 12 | 27 |
| KCNIP2   | chr10 | 103600241 | G    | C   | --     | --    | Intron  | SNP | 0.364 | 7  | 4  |
| PPRC1    | chr10 | 103905289 | C    | G   | --     | --    | Intron  | SNP | 0.438 | 9  | 7  |
| GBF1     | chr10 | 104020230 | C    | T   | --     | --    | Intron  | SNP | 0.286 | 10 | 4  |
| --       | chr10 | 104197630 | G    | A   | --     | --    | IGR     | SNP | 0.167 | 20 | 4  |
| TMEM180  | chr10 | 104234666 | A    | G   | --     | --    | Intron  | SNP | 0.789 | 4  | 15 |
| SUFU     | chr10 | 104348172 | T    | A   | --     | --    | Intron  | SNP | 0.435 | 13 | 10 |
| CNNM2    | chr10 | 104747074 | CTTA | -   | --     | --    | Intron  | DEL | 0.111 | 16 | 2  |
| NT5C2    | chr10 | 104903390 | G    | T   | --     | --    | Intron  | SNP | 0.250 | 9  | 3  |
| --       | chr10 | 105032522 | T    | A   | --     | --    | IGR     | SNP | 0.571 | 3  | 4  |
| --       | chr10 | 105032523 | A    | T   | --     | --    | IGR     | SNP | 0.571 | 3  | 4  |
| --       | chr10 | 105251770 | T    | C   | --     | --    | IGR     | SNP | 0.186 | 35 | 8  |
| SH3PXD2A | chr10 | 105366645 | G    | C   | --     | --    | Intron  | SNP | 0.167 | 20 | 4  |
| SH3PXD2A | chr10 | 105366650 | G    | T   | --     | --    | Intron  | SNP | 0.174 | 19 | 4  |
| --       | chr10 | 105726193 | G    | A   | --     | --    | IGR     | SNP | 0.286 | 10 | 4  |
| SLK      | chr10 | 105760236 | ATC  | -   | --     | --    | Intron  | DEL | 0.222 | 21 | 6  |
| --       | chr10 | 106217249 | C    | A   | --     | --    | IGR     | SNP | 0.324 | 23 | 11 |
| SORCS3   | chr10 | 106473237 | T    | C   | --     | --    | Intron  | SNP | 0.189 | 30 | 7  |
| SORCS3   | chr10 | 106473308 | G    | C   | --     | --    | Intron  | SNP | 0.259 | 20 | 7  |
| SORCS3   | chr10 | 106474307 | G    | T   | --     | --    | Intron  | SNP | 0.200 | 24 | 6  |
| SORCS3   | chr10 | 106616740 | TGA  | -   | --     | --    | Intron  | DEL | 0.111 | 16 | 2  |
| SORCS3   | chr10 | 106813429 | G    | A   | --     | --    | Intron  | SNP | 0.667 | 3  | 6  |
| SORCS3   | chr10 | 106872175 | G    | C   | --     | --    | Intron  | SNP | 0.677 | 10 | 21 |
| SORCS3   | chr10 | 107018155 | C    | G   | --     | --    | Intron  | SNP | 0.200 | 32 | 8  |
| --       | chr10 | 107071994 | G    | A   | --     | --    | IGR     | SNP | 0.250 | 12 | 4  |
| --       | chr10 | 107209021 | C    | T   | --     | --    | IGR     | SNP | 0.146 | 35 | 6  |
| --       | chr10 | 107237247 | G    | T   | --     | --    | IGR     | SNP | 0.160 | 21 | 4  |
| --       | chr10 | 107237248 | C    | T   | --     | --    | IGR     | SNP | 0.160 | 21 | 4  |
| --       | chr10 | 107237289 | A    | G   | --     | --    | IGR     | SNP | 0.160 | 21 | 4  |
| --       | chr10 | 107307612 | A    | G   | --     | --    | IGR     | SNP | 0.194 | 29 | 7  |
| --       | chr10 | 107625464 | T    | C   | --     | --    | IGR     | SNP | 0.708 | 7  | 17 |
| --       | chr10 | 107656457 | G    | A   | --     | --    | IGR     | SNP | 0.308 | 9  | 4  |
| --       | chr10 | 107694759 | G    | T   | --     | --    | IGR     | SNP | 0.452 | 23 | 19 |
| --       | chr10 | 107854736 | A    | T   | --     | --    | IGR     | SNP | 0.615 | 5  | 8  |
| SORCS1   | chr10 | 108508359 | A    | C   | --     | --    | Intron  | SNP | 0.632 | 14 | 24 |
| SORCS1   | chr10 | 108552188 | G    | A   | --     | --    | Intron  | SNP | 0.407 | 16 | 11 |
| SORCS1   | chr10 | 108720516 | C    | T   | --     | --    | Intron  | SNP | 0.260 | 37 | 13 |
| SORCS1   | chr10 | 108844038 | G    | T   | --     | --    | Intron  | SNP | 0.353 | 11 | 6  |
| SORCS1   | chr10 | 108844040 | A    | T   | --     | --    | Intron  | SNP | 0.471 | 9  | 8  |
| SORCS1   | chr10 | 108844922 | A    | G   | --     | --    | Intron  | SNP | 0.167 | 25 | 5  |
| SORCS1   | chr10 | 108893688 | C    | A   | --     | --    | Intron  | SNP | 0.368 | 24 | 14 |
| --       | chr10 | 109058285 | C    | A   | --     | --    | IGR     | SNP | 0.286 | 10 | 4  |
| --       | chr10 | 109135624 | G    | A   | --     | --    | IGR     | SNP | 0.387 | 19 | 12 |
| --       | chr10 | 109430812 | C    | A   | --     | --    | IGR     | SNP | 0.587 | 19 | 27 |
| --       | chr10 | 109478973 | C    | A   | --     | --    | IGR     | SNP | 0.500 | 15 | 15 |
| --       | chr10 | 109478994 | T    | A   | --     | --    | IGR     | SNP | 0.529 | 16 | 18 |
| --       | chr10 | 109498025 | G    | A   | --     | --    | IGR     | SNP | 0.583 | 15 | 21 |
| --       | chr10 | 109561747 | T    | A   | --     | --    | IGR     | SNP | 0.419 | 25 | 18 |
| --       | chr10 | 109747487 | A    | T   | --     | --    | IGR     | SNP | 0.533 | 14 | 16 |
| --       | chr10 | 109835767 | T    | A   | --     | --    | IGR     | SNP | 0.263 | 14 | 5  |
| --       | chr10 | 110025824 | G    | C   | --     | --    | IGR     | SNP | 0.690 | 9  | 20 |
| --       | chr10 | 110334171 | A    | G   | --     | --    | IGR     | SNP | 0.182 | 27 | 6  |
| --       | chr10 | 110382033 | G    | C   | --     | --    | IGR     | SNP | 0.250 | 9  | 3  |
| --       | chr10 | 110429850 | G    | T   | --     | --    | IGR     | SNP | 0.447 | 21 | 17 |
| --       | chr10 | 110491940 | C    | G   | --     | --    | IGR     | SNP | 0.568 | 16 | 21 |
| --       | chr10 | 110636427 | G    | C   | --     | --    | IGR     | SNP | 0.621 | 11 | 18 |
| --       | chr10 | 110673535 | G    | A   | --     | --    | IGR     | SNP | 0.590 | 16 | 23 |
| --       | chr10 | 110715096 | G    | T   | --     | --    | IGR     | SNP | 0.647 | 12 | 22 |
| --       | chr10 | 111368412 | C    | T   | --     | --    | IGR     | SNP | 0.364 | 7  | 4  |
| XPNPEP1  | chr10 | 111676279 | G    | C   | --     | --    | Intron  | SNP | 0.677 | 10 | 21 |
| XPNPEP1  | chr10 | 111682622 | C    | A   | --     | --    | Intron  | SNP | 0.189 | 30 | 7  |

|                  |       |           |     |       |    |    |         |     |       |    |    |
|------------------|-------|-----------|-----|-------|----|----|---------|-----|-------|----|----|
| --               | chr10 | 111940263 | C   | A     | -- | -- | IGR     | SNP | 0.250 | 12 | 4  |
| --               | chr10 | 112171958 | C   | G     | -- | -- | IGR     | SNP | 0.158 | 32 | 6  |
| --               | chr10 | 112226763 | G   | C     | -- | -- | IGR     | SNP | 0.731 | 7  | 19 |
| --               | chr10 | 112246651 | G   | A     | -- | -- | IGR     | SNP | 0.190 | 34 | 8  |
| <i>RBM20</i>     | chr10 | 112412715 | G   | T     | -- | -- | Intron  | SNP | 0.308 | 27 | 12 |
| <i>BBIP1</i>     | chr10 | 112676952 | A   | T     | -- | -- | Intron  | SNP | 0.182 | 18 | 4  |
| <i>SHOC2</i>     | chr10 | 112730232 | G   | A     | -- | -- | Intron  | SNP | 0.295 | 43 | 18 |
| --               | chr10 | 112890605 | -   | GGT   | -- | -- | IGR     | INS | 0.125 | 28 | 4  |
| --               | chr10 | 113209499 | G   | C     | -- | -- | IGR     | SNP | 0.659 | 15 | 29 |
| --               | chr10 | 113259538 | G   | C     | -- | -- | IGR     | SNP | 0.533 | 14 | 16 |
| --               | chr10 | 113259920 | G   | A     | -- | -- | IGR     | SNP | 0.630 | 10 | 17 |
| --               | chr10 | 113357473 | C   | A     | -- | -- | IGR     | SNP | 0.161 | 26 | 5  |
| --               | chr10 | 113608391 | T   | A     | -- | -- | IGR     | SNP | 0.324 | 23 | 11 |
| --               | chr10 | 113608392 | C   | A     | -- | -- | IGR     | SNP | 0.343 | 23 | 12 |
| --               | chr10 | 113777331 | C   | T     | -- | -- | IGR     | SNP | 0.667 | 11 | 22 |
| <i>ACSL5</i>     | chr10 | 114152675 | AAT | -     | -- | -- | Intron  | DEL | 0.143 | 18 | 3  |
| <i>VT11A</i>     | chr10 | 114355754 | G   | A     | -- | -- | Intron  | SNP | 0.250 | 6  | 2  |
| --               | chr10 | 114668555 | C   | T     | -- | -- | IGR     | SNP | 0.250 | 12 | 4  |
| <i>TCF7L2</i>    | chr10 | 114743642 | C   | A     | -- | -- | Intron  | SNP | 0.300 | 28 | 12 |
| <i>TCF7L2</i>    | chr10 | 114844453 | A   | T     | -- | -- | Intron  | SNP | 0.216 | 29 | 8  |
| <i>TCF7L2</i>    | chr10 | 114867536 | C   | A     | -- | -- | Intron  | SNP | 0.308 | 9  | 4  |
| <i>TCF7L2</i>    | chr10 | 114867539 | C   | A     | -- | -- | Intron  | SNP | 0.308 | 9  | 4  |
| --               | chr10 | 115269676 | G   | A     | -- | -- | IGR     | SNP | 0.233 | 33 | 10 |
| --               | chr10 | 115677736 | G   | C     | -- | -- | IGR     | SNP | 0.830 | 8  | 39 |
| <i>TDRD1</i>     | chr10 | 115943480 | G   | T     | -- | -- | Intron  | SNP | 0.308 | 9  | 4  |
| <i>ABLIM1</i>    | chr10 | 116386270 | C   | A     | -- | -- | Intron  | SNP | 0.300 | 35 | 15 |
| <i>ABLIM1</i>    | chr10 | 116402706 | A   | G     | -- | -- | Intron  | SNP | 0.300 | 21 | 9  |
| --               | chr10 | 116552393 | C   | T     | -- | -- | IGR     | SNP | 0.296 | 19 | 8  |
| <i>FAM160B1</i>  | chr10 | 116587942 | C   | G     | -- | -- | Intron  | SNP | 0.242 | 25 | 8  |
| <i>FAM160B1</i>  | chr10 | 116643152 | G   | A     | -- | -- | Intron  | SNP | 0.659 | 14 | 27 |
| <i>ATRNL1</i>    | chr10 | 116986862 | A   | T     | -- | -- | Intron  | SNP | 0.469 | 26 | 23 |
| <i>ATRNL1</i>    | chr10 | 117087810 | A   | G     | -- | -- | Intron  | SNP | 0.107 | 25 | 3  |
| <i>ATRNL1</i>    | chr10 | 117152821 | C   | G     | -- | -- | Intron  | SNP | 0.295 | 31 | 13 |
| <i>ATRNL1</i>    | chr10 | 117239745 | -   | CACAA | -- | -- | Intron  | INS | 0.167 | 15 | 3  |
| <i>ATRNL1</i>    | chr10 | 117309968 | A   | G     | -- | -- | Intron  | SNP | 0.471 | 9  | 8  |
| <i>ATRNL1</i>    | chr10 | 117352053 | C   | A     | -- | -- | Intron  | SNP | 0.194 | 25 | 6  |
| <i>ATRNL1</i>    | chr10 | 117439477 | A   | G     | -- | -- | Intron  | SNP | 0.548 | 14 | 17 |
| <i>ATRNL1</i>    | chr10 | 117543627 | C   | T     | -- | -- | Intron  | SNP | 0.259 | 20 | 7  |
| --               | chr10 | 117805383 | G   | T     | -- | -- | IGR     | SNP | 0.306 | 25 | 11 |
| <i>GFRA1</i>     | chr10 | 117988492 | C   | A     | -- | -- | Intron  | SNP | 0.333 | 10 | 5  |
| <i>PNLIPRP3</i>  | chr10 | 118228841 | A   | T     | -- | -- | Intron  | SNP | 0.167 | 20 | 4  |
| --               | chr10 | 118330612 | C   | A     | -- | -- | IGR     | SNP | 0.129 | 27 | 4  |
| <i>PNLIPRP1</i>  | chr10 | 118364193 | C   | T     | -- | -- | Intron  | SNP | 0.235 | 13 | 4  |
| --               | chr10 | 118772010 | A   | G     | -- | -- | IGR     | SNP | 0.385 | 24 | 15 |
| <i>KCNK18</i>    | chr10 | 118958039 | T   | A     | -- | -- | Intron  | SNP | 0.444 | 20 | 16 |
| <i>SLC18A2</i>   | chr10 | 119021775 | G   | A     | -- | -- | Intron  | SNP | 0.686 | 16 | 35 |
| <i>PDZD8</i>     | chr10 | 119083746 | G   | A     | -- | -- | Intron  | SNP | 0.138 | 25 | 4  |
| --               | chr10 | 119144036 | T   | G     | -- | -- | IGR     | SNP | 0.263 | 28 | 10 |
| <i>EMX2OS</i>    | chr10 | 119279891 | G   | A     | -- | -- | RNA     | SNP | 0.439 | 23 | 18 |
| --               | chr10 | 119417927 | A   | T     | -- | -- | IGR     | SNP | 0.190 | 17 | 4  |
| <i>CASC2</i>     | chr10 | 119884948 | A   | T     | -- | -- | RNA     | SNP | 0.214 | 44 | 12 |
| <i>CASC2</i>     | chr10 | 119970466 | G   | C     | -- | -- | 3'Flank | SNP | 0.276 | 21 | 8  |
| --               | chr10 | 120148611 | T   | C     | -- | -- | IGR     | SNP | 0.286 | 25 | 10 |
| --               | chr10 | 120400116 | C   | T     | -- | -- | IGR     | SNP | 0.281 | 23 | 9  |
| --               | chr10 | 120855275 | A   | T     | -- | -- | IGR     | SNP | 0.174 | 19 | 4  |
| --               | chr10 | 120960750 | G   | T     | -- | -- | IGR     | SNP | 0.111 | 32 | 4  |
| <i>GRK5</i>      | chr10 | 120990302 | C   | A     | -- | -- | Intron  | SNP | 0.706 | 10 | 24 |
| <i>GRK5</i>      | chr10 | 120993051 | C   | T     | -- | -- | Intron  | SNP | 0.380 | 31 | 19 |
| --               | chr10 | 121329281 | G   | T     | -- | -- | IGR     | SNP | 0.211 | 15 | 4  |
| <i>INPP5F</i>    | chr10 | 121532102 | C   | T     | -- | -- | Intron  | SNP | 0.600 | 16 | 24 |
| <i>SEC23IP</i>   | chr10 | 121698070 | G   | A     | -- | -- | Intron  | SNP | 0.500 | 15 | 15 |
| --               | chr10 | 121769935 | G   | C     | -- | -- | IGR     | SNP | 0.297 | 26 | 11 |
| --               | chr10 | 122015235 | C   | A     | -- | -- | IGR     | SNP | 0.211 | 15 | 4  |
| --               | chr10 | 122184988 | C   | G     | -- | -- | IGR     | SNP | 0.293 | 29 | 12 |
| --               | chr10 | 122377726 | C   | A     | -- | -- | IGR     | SNP | 0.327 | 33 | 16 |
| <i>LOC283089</i> | chr10 | 122522292 | GA  | -     | -- | -- | RNA     | DEL | 0.326 | 31 | 15 |
| <i>LOC283089</i> | chr10 | 122536130 | G   | T     | -- | -- | RNA     | SNP | 0.250 | 42 | 14 |
| <i>WDR11</i>     | chr10 | 122668987 | T   | C     | -- | -- | 3'UTR   | SNP | 0.115 | 23 | 3  |
| --               | chr10 | 122949208 | C   | T     | -- | -- | IGR     | SNP | 0.235 | 13 | 4  |
| --               | chr10 | 123102609 | A   | G     | -- | -- | IGR     | SNP | 0.267 | 33 | 12 |
| --               | chr10 | 123212986 | T   | G     | -- | -- | IGR     | SNP | 0.226 | 41 | 12 |
| <i>HTRA1</i>     | chr10 | 124260540 | G   | A     | -- | -- | Intron  | SNP | 0.267 | 33 | 12 |
| --               | chr10 | 124441159 | T   | C     | -- | -- | IGR     | SNP | 0.267 | 11 | 4  |
| --               | chr10 | 124450723 | C   | T     | -- | -- | IGR     | SNP | 0.214 | 22 | 6  |
| --               | chr10 | 125017490 | C   | T     | -- | -- | IGR     | SNP | 0.226 | 24 | 7  |
| --               | chr10 | 125169132 | G   | A     | -- | -- | IGR     | SNP | 0.250 | 30 | 10 |
| --               | chr10 | 125220879 | TG  | -     | -- | -- | IGR     | DEL | 0.107 | 24 | 3  |
| --               | chr10 | 125274443 | T   | G     | -- | -- | IGR     | SNP | 0.377 | 33 | 20 |
| --               | chr10 | 125347704 | A   | T     | -- | -- | IGR     | SNP | 0.226 | 24 | 7  |
| --               | chr10 | 125357647 | T   | C     | -- | -- | IGR     | SNP | 0.245 | 40 | 13 |

|             |       |           |   |     |    |    |        |     |       |    |    |
|-------------|-------|-----------|---|-----|----|----|--------|-----|-------|----|----|
| --          | chr10 | 125470802 | A | T   | -- | -- | IGR    | SNP | 0.462 | 21 | 18 |
| --          | chr10 | 125859877 | G | A   | -- | -- | IGR    | SNP | 0.522 | 22 | 24 |
| --          | chr10 | 126013035 | A | G   | -- | -- | IGR    | SNP | 0.250 | 12 | 4  |
| LHPP        | chr10 | 126151045 | G | C   | -- | -- | Intron | SNP | 0.167 | 20 | 4  |
| LHPP        | chr10 | 126189157 | T | C   | -- | -- | Intron | SNP | 0.459 | 20 | 17 |
| FAM53B      | chr10 | 126328232 | C | G   | -- | -- | Intron | SNP | 0.290 | 22 | 9  |
| FAM53B      | chr10 | 126407779 | C | T   | -- | -- | Intron | SNP | 0.158 | 32 | 6  |
| --          | chr10 | 126564861 | C | G   | -- | -- | IGR    | SNP | 0.281 | 23 | 9  |
| --          | chr10 | 126861163 | G | T   | -- | -- | IGR    | SNP | 0.200 | 12 | 3  |
| --          | chr10 | 127249176 | T | G   | -- | -- | IGR    | SNP | 0.262 | 31 | 11 |
| --          | chr10 | 127305028 | C | T   | -- | -- | IGR    | SNP | 0.667 | 1  | 2  |
| BCCIP,DHX32 | chr10 | 127538723 | A | T   | -- | -- | Intron | SNP | 0.174 | 19 | 4  |
| ADAM12      | chr10 | 127753370 | C | T   | -- | -- | Intron | SNP | 0.762 | 15 | 48 |
| ADAM12      | chr10 | 127788868 | G | A   | -- | -- | Intron | SNP | 0.119 | 37 | 5  |
| ADAM12      | chr10 | 127873894 | G | T   | -- | -- | Intron | SNP | 0.250 | 21 | 7  |
| C10orf90    | chr10 | 128143408 | G | A   | -- | -- | Intron | SNP | 0.233 | 33 | 10 |
| --          | chr10 | 128494533 | C | T   | -- | -- | IGR    | SNP | 0.211 | 30 | 8  |
| DOCK1       | chr10 | 128795987 | G | A   | -- | -- | Intron | SNP | 0.245 | 37 | 12 |
| DOCK1       | chr10 | 129159595 | G | T   | -- | -- | Intron | SNP | 0.129 | 27 | 4  |
| --          | chr10 | 129967126 | G | T   | -- | -- | IGR    | SNP | 0.422 | 26 | 19 |
| --          | chr10 | 130069738 | G | C   | -- | -- | IGR    | SNP | 0.238 | 32 | 10 |
| --          | chr10 | 130254467 | G | C   | -- | -- | IGR    | SNP | 0.615 | 15 | 24 |
| --          | chr10 | 130269639 | G | A   | -- | -- | IGR    | SNP | 0.362 | 37 | 21 |
| --          | chr10 | 131125324 | C | A   | -- | -- | IGR    | SNP | 0.289 | 32 | 13 |
| MGMT        | chr10 | 131379192 | C | G   | -- | -- | Intron | SNP | 0.304 | 48 | 21 |
| --          | chr10 | 131609614 | G | T   | -- | -- | IGR    | SNP | 0.372 | 27 | 16 |
| --          | chr10 | 131819098 | G | T   | -- | -- | IGR    | SNP | 0.313 | 33 | 15 |
| --          | chr10 | 132395936 | G | A   | -- | -- | IGR    | SNP | 0.696 | 7  | 16 |
| --          | chr10 | 132424089 | G | C   | -- | -- | IGR    | SNP | 0.125 | 28 | 4  |
| --          | chr10 | 132445247 | G | A   | -- | -- | IGR    | SNP | 0.297 | 26 | 11 |
| --          | chr10 | 132671495 | G | C   | -- | -- | IGR    | SNP | 0.263 | 28 | 10 |
| --          | chr10 | 132685848 | T | A   | -- | -- | IGR    | SNP | 0.269 | 19 | 7  |
| TCERG1L     | chr10 | 133022390 | C | A   | -- | -- | Intron | SNP | 0.191 | 38 | 9  |
| TCERG1L     | chr10 | 133034410 | C | T   | -- | -- | Intron | SNP | 0.391 | 14 | 9  |
| --          | chr10 | 133338650 | - | TTC | -- | -- | IGR    | INS | 0.111 | 16 | 2  |
| --          | chr10 | 133625807 | G | T   | -- | -- | IGR    | SNP | 0.200 | 24 | 6  |
| --          | chr10 | 133659347 | G | A   | -- | -- | IGR    | SNP | 0.368 | 12 | 7  |
| JAKMIP3     | chr10 | 133935973 | G | C   | -- | -- | Intron | SNP | 0.614 | 17 | 27 |
| JAKMIP3     | chr10 | 133941002 | A | C   | -- | -- | Intron | SNP | 0.192 | 21 | 5  |
| JAKMIP3     | chr10 | 133944808 | C | G   | -- | -- | Intron | SNP | 0.171 | 29 | 6  |
| LRRC27      | chr10 | 134172145 | G | A   | -- | -- | Intron | SNP | 0.333 | 14 | 7  |
| --          | chr10 | 134344777 | G | T   | -- | -- | IGR    | SNP | 0.250 | 12 | 4  |
| INPP5A      | chr10 | 134470841 | C | T   | -- | -- | Intron | SNP | 0.211 | 45 | 12 |
| INPP5A      | chr10 | 134564921 | A | C   | -- | -- | Intron | SNP | 0.128 | 34 | 5  |
| C10orf92    | chr10 | 134639629 | G | A   | -- | -- | Intron | SNP | 0.143 | 48 | 8  |
| --          | chr10 | 134702171 | T | G   | -- | -- | IGR    | SNP | 0.300 | 14 | 6  |
| ADAM8       | chr10 | 135078650 | A | G   | -- | -- | Intron | SNP | 0.250 | 39 | 13 |
| --          | chr10 | 135392441 | G | C   | -- | -- | IGR    | SNP | 0.304 | 16 | 7  |
| --          | chr10 | 135460159 | T | C   | -- | -- | IGR    | SNP | 0.161 | 26 | 5  |
| --          | chr10 | 135460163 | T | C   | -- | -- | IGR    | SNP | 0.143 | 30 | 5  |
| --          | chr10 | 135460702 | G | C   | -- | -- | IGR    | SNP | 0.105 | 34 | 4  |
| --          | chr10 | 135465727 | G | A   | -- | -- | IGR    | SNP | 0.250 | 9  | 3  |
| --          | chr10 | 135468215 | C | T   | -- | -- | IGR    | SNP | 0.125 | 28 | 4  |
| --          | chr10 | 135473605 | C | T   | -- | -- | IGR    | SNP | 0.118 | 45 | 6  |
| --          | chr10 | 135508253 | - | CA  | -- | -- | IGR    | INS | 0.217 | 18 | 5  |
| --          | chr11 | 175762    | C | T   | -- | -- | IGR    | SNP | 0.213 | 37 | 10 |
| --          | chr11 | 186379    | T | C   | -- | -- | IGR    | SNP | 0.128 | 41 | 6  |
| PKP3        | chr11 | 398631    | G | C   | -- | -- | Intron | SNP | 0.276 | 21 | 8  |
| CHID1       | chr11 | 887962    | C | T   | -- | -- | Intron | SNP | 0.277 | 68 | 26 |
| MUC6        | chr11 | 1014401   | C | T   | -- | -- | Intron | SNP | 0.911 | 5  | 51 |
| --          | chr11 | 1376489   | G | A   | -- | -- | IGR    | SNP | 0.111 | 32 | 4  |
| MOB2        | chr11 | 1570076   | G | A   | -- | -- | Intron | SNP | 0.237 | 29 | 9  |
| MOB2        | chr11 | 1709980   | - | CG  | -- | -- | Intron | INS | 0.143 | 47 | 8  |
| --          | chr11 | 2227222   | T | C   | -- | -- | IGR    | SNP | 0.185 | 22 | 5  |
| ASCL2       | chr11 | 2291699   | G | A   | -- | -- | 5'UTR  | SNP | 0.196 | 41 | 10 |
| KCNQ1       | chr11 | 2541781   | T | G   | -- | -- | Intron | SNP | 0.333 | 36 | 18 |
| --          | chr11 | 3092616   | A | T   | -- | -- | IGR    | SNP | 0.222 | 14 | 4  |
| --          | chr11 | 3315438   | G | A   | -- | -- | IGR    | SNP | 1.000 | 0  | 9  |
| --          | chr11 | 3451832   | G | A   | -- | -- | IGR    | SNP | 0.138 | 25 | 4  |
| --          | chr11 | 3451896   | G | C   | -- | -- | IGR    | SNP | 0.185 | 22 | 5  |
| --          | chr11 | 3463900   | C | G   | -- | -- | IGR    | SNP | 0.216 | 29 | 8  |
| --          | chr11 | 3463911   | T | C   | -- | -- | IGR    | SNP | 0.229 | 27 | 8  |
| --          | chr11 | 3463916   | G | A   | -- | -- | IGR    | SNP | 0.243 | 28 | 9  |
| --          | chr11 | 3474517   | A | C   | -- | -- | IGR    | SNP | 0.157 | 43 | 8  |
| --          | chr11 | 3489423   | C | G   | -- | -- | IGR    | SNP | 0.667 | 2  | 4  |
| --          | chr11 | 3519156   | G | A   | -- | -- | IGR    | SNP | 0.156 | 27 | 5  |
| --          | chr11 | 3519193   | C | T   | -- | -- | IGR    | SNP | 0.156 | 27 | 5  |
| --          | chr11 | 3528292   | C | T   | -- | -- | IGR    | SNP | 0.114 | 39 | 5  |
| --          | chr11 | 3548895   | G | A   | -- | -- | IGR    | SNP | 0.129 | 27 | 4  |
| --          | chr11 | 3553891   | T | C   | -- | -- | IGR    | SNP | 0.227 | 34 | 10 |

|           |       |          |        |        |    |    |         |     |       |    |    |
|-----------|-------|----------|--------|--------|----|----|---------|-----|-------|----|----|
| --        | chr11 | 3554131  | T      | C      | -- | -- | IGR     | SNP | 0.244 | 34 | 11 |
| --        | chr11 | 3554163  | A      | T      | -- | -- | IGR     | SNP | 0.250 | 30 | 10 |
| --        | chr11 | 3639258  | G      | T      | -- | -- | IGR     | SNP | 0.284 | 48 | 19 |
| ART1      | chr11 | 3675155  | A      | G      | -- | -- | Intron  | SNP | 0.162 | 31 | 6  |
| NUP98     | chr11 | 3696371  | TAA    | -      | -- | -- | 3'UTR   | DEL | 0.367 | 19 | 11 |
| NUP98     | chr11 | 3776195  | T      | A      | -- | -- | Intron  | SNP | 0.200 | 16 | 4  |
| STIM1     | chr11 | 3962241  | C      | T      | -- | -- | Intron  | SNP | 0.952 | 2  | 40 |
| STIM1     | chr11 | 4039717  | C      | A      | -- | -- | Intron  | SNP | 0.429 | 4  | 3  |
| --        | chr11 | 4249812  | G      | A      | -- | -- | IGR     | SNP | 0.333 | 12 | 6  |
| --        | chr11 | 4263134  | C      | A      | -- | -- | IGR     | SNP | 0.143 | 36 | 6  |
| --        | chr11 | 4483633  | A      | T      | -- | -- | IGR     | SNP | 0.250 | 42 | 14 |
| --        | chr11 | 4494958  | G      | A      | -- | -- | IGR     | SNP | 0.925 | 3  | 37 |
| --        | chr11 | 4817073  | G      | A      | -- | -- | IGR     | SNP | 0.207 | 23 | 6  |
| --        | chr11 | 4860574  | G      | A      | -- | -- | IGR     | SNP | 0.940 | 3  | 47 |
| --        | chr11 | 4978975  | C      | G      | -- | -- | IGR     | SNP | 0.853 | 5  | 29 |
| --        | chr11 | 5031620  | G      | T      | -- | -- | IGR     | SNP | 0.452 | 17 | 14 |
| --        | chr11 | 5077039  | GA     | -      | -- | -- | IGR     | DEL | 0.667 | 10 | 20 |
| --        | chr11 | 5295733  | T      | G      | -- | -- | IGR     | SNP | 0.873 | 7  | 48 |
| OR51B5    | chr11 | 5501307  | -      | CCACAG | -- | -- | Intron  | INS | 0.188 | 13 | 3  |
| TRIM3     | chr11 | 6475634  | C      | A      | -- | -- | Intron  | SNP | 0.263 | 14 | 5  |
| DNHD1     | chr11 | 6517760  | G      | T      | -- | -- | 5'Flank | SNP | 0.308 | 9  | 4  |
| DCHS1     | chr11 | 6657945  | T      | C      | -- | -- | Intron  | SNP | 0.259 | 40 | 14 |
| --        | chr11 | 6847663  | T      | A      | -- | -- | Intron  | SNP | 0.190 | 17 | 4  |
| OR10A2    | chr11 | 6892443  | G      | A      | -- | -- | 3'Flank | SNP | 0.214 | 22 | 6  |
| --        | chr11 | 6928290  | C      | T      | -- | -- | IGR     | SNP | 0.875 | 2  | 14 |
| --        | chr11 | 7108536  | C      | A      | -- | -- | IGR     | SNP | 0.267 | 33 | 12 |
| --        | chr11 | 7134757  | T      | A      | -- | -- | IGR     | SNP | 0.800 | 1  | 4  |
| SYT9      | chr11 | 7297999  | C      | T      | -- | -- | Intron  | SNP | 0.880 | 6  | 44 |
| SYT9      | chr11 | 7298798  | G      | T      | -- | -- | Intron  | SNP | 0.209 | 34 | 9  |
| SYT9      | chr11 | 7398780  | C      | T      | -- | -- | Intron  | SNP | 0.925 | 4  | 49 |
| --        | chr11 | 7492595  | C      | T      | -- | -- | IGR     | SNP | 0.143 | 24 | 4  |
| --        | chr11 | 7787747  | C      | G      | -- | -- | IGR     | SNP | 0.944 | 1  | 17 |
| --        | chr11 | 7789013  | G      | A      | -- | -- | IGR     | SNP | 0.714 | 2  | 5  |
| LOC283299 | chr11 | 7884548  | A      | C      | -- | -- | RNA     | SNP | 0.267 | 11 | 4  |
| --        | chr11 | 8003854  | G      | T      | -- | -- | IGR     | SNP | 0.436 | 22 | 17 |
| LMO1      | chr11 | 8255619  | C      | A      | -- | -- | Intron  | SNP | 0.317 | 41 | 19 |
| LMO1      | chr11 | 8278422  | C      | A      | -- | -- | Intron  | SNP | 0.360 | 57 | 32 |
| LMO1      | chr11 | 8283216  | G      | A      | -- | -- | Intron  | SNP | 0.346 | 34 | 18 |
| STK33     | chr11 | 8452664  | G      | A      | -- | -- | Intron  | SNP | 0.103 | 35 | 4  |
| ST5       | chr11 | 8887257  | C      | A      | -- | -- | Intron  | SNP | 0.984 | 1  | 63 |
| SCUBE2    | chr11 | 9062043  | C      | T      | -- | -- | Intron  | SNP | 0.167 | 60 | 12 |
| DENND5A   | chr11 | 9194020  | T      | A      | -- | -- | Intron  | SNP | 0.185 | 44 | 10 |
| DENND5A   | chr11 | 9268179  | G      | A      | -- | -- | Intron  | SNP | 0.125 | 21 | 3  |
| IPO7      | chr11 | 9442094  | G      | T      | -- | -- | Intron  | SNP | 0.225 | 31 | 9  |
| ZNF143    | chr11 | 9506916  | G      | T      | -- | -- | Intron  | SNP | 0.235 | 13 | 4  |
| --        | chr11 | 9640395  | C      | A      | -- | -- | IGR     | SNP | 0.200 | 16 | 4  |
| SWAP70    | chr11 | 9694102  | G      | T      | -- | -- | Intron  | SNP | 0.308 | 9  | 4  |
| SBF2      | chr11 | 10263411 | ATTCCC | -      | -- | -- | Intron  | DEL | 0.905 | 4  | 38 |
| --        | chr11 | 11088728 | G      | C      | -- | -- | IGR     | SNP | 0.255 | 35 | 12 |
| --        | chr11 | 11266419 | C      | T      | -- | -- | IGR     | SNP | 0.902 | 5  | 46 |
| GALNTL4   | chr11 | 11318918 | T      | A      | -- | -- | Intron  | SNP | 0.220 | 46 | 13 |
| GALNTL4   | chr11 | 11366892 | C      | G      | -- | -- | Intron  | SNP | 0.967 | 1  | 29 |
| GALNTL4   | chr11 | 11547179 | C      | T      | -- | -- | Intron  | SNP | 0.235 | 13 | 4  |
| USP47     | chr11 | 11956013 | G      | A      | -- | -- | Intron  | SNP | 1.000 | 0  | 38 |
| MICALCL   | chr11 | 12357952 | -      | AC     | -- | -- | Intron  | INS | 0.118 | 15 | 2  |
| PARVA     | chr11 | 12496808 | C      | G      | -- | -- | Intron  | SNP | 0.134 | 58 | 9  |
| --        | chr11 | 12983294 | T      | G      | -- | -- | IGR     | SNP | 0.304 | 16 | 7  |
| --        | chr11 | 13535525 | G      | A      | -- | -- | IGR     | SNP | 0.243 | 28 | 9  |
| --        | chr11 | 13580636 | T      | C      | -- | -- | IGR     | SNP | 0.286 | 10 | 4  |
| --        | chr11 | 13580642 | G      | C      | -- | -- | IGR     | SNP | 0.308 | 9  | 4  |
| --        | chr11 | 13580647 | G      | C      | -- | -- | IGR     | SNP | 0.308 | 9  | 4  |
| --        | chr11 | 13959615 | CT     | -      | -- | -- | IGR     | DEL | 0.167 | 15 | 3  |
| PDE3B     | chr11 | 14828436 | G      | A      | -- | -- | Intron  | SNP | 0.313 | 11 | 5  |
| --        | chr11 | 15308196 | C      | T      | -- | -- | IGR     | SNP | 0.925 | 3  | 37 |
| --        | chr11 | 15564910 | C      | A      | -- | -- | IGR     | SNP | 0.955 | 2  | 42 |
| --        | chr11 | 15740569 | G      | T      | -- | -- | IGR     | SNP | 1.000 | 0  | 44 |
| --        | chr11 | 15948868 | C      | A      | -- | -- | IGR     | SNP | 0.263 | 28 | 10 |
| --        | chr11 | 15980756 | C      | T      | -- | -- | IGR     | SNP | 0.233 | 23 | 7  |
| SOX6      | chr11 | 16143929 | C      | A      | -- | -- | Intron  | SNP | 0.204 | 39 | 10 |
| SOX6      | chr11 | 16400414 | C      | A      | -- | -- | Intron  | SNP | 0.148 | 23 | 4  |
| --        | chr11 | 16519494 | C      | G      | -- | -- | IGR     | SNP | 0.129 | 27 | 4  |
| --        | chr11 | 16520028 | G      | A      | -- | -- | IGR     | SNP | 0.143 | 18 | 3  |
| --        | chr11 | 16520268 | C      | T      | -- | -- | IGR     | SNP | 0.125 | 21 | 3  |
| --        | chr11 | 16735045 | A      | T      | -- | -- | IGR     | SNP | 0.304 | 16 | 7  |
| PLEKHA7   | chr11 | 16898106 | -      | AT     | -- | -- | Intron  | INS | 0.313 | 33 | 15 |
| PLEKHA7   | chr11 | 16910558 | C      | T      | -- | -- | Intron  | SNP | 0.122 | 36 | 5  |
| PLEKHA7   | chr11 | 16952572 | C      | A      | -- | -- | Intron  | SNP | 0.415 | 24 | 17 |
| PLEKHA7   | chr11 | 16952573 | T      | C      | -- | -- | Intron  | SNP | 0.372 | 27 | 16 |
| B7H6      | chr11 | 17389383 | G      | T      | -- | -- | Intron  | SNP | 0.167 | 20 | 4  |
| ABCC8     | chr11 | 17476494 | G      | A      | -- | -- | Intron  | SNP | 0.926 | 4  | 50 |



|          |       |          |      |       |    |    |        |     |       |    |    |
|----------|-------|----------|------|-------|----|----|--------|-----|-------|----|----|
| --       | chr11 | 17712476 | A    | G     | -- | -- | IGR    | SNP | 0.152 | 39 | 7  |
| KCNC1    | chr11 | 17766136 | T    | A     | -- | -- | Intron | SNP | 0.273 | 32 | 12 |
| --       | chr11 | 18999770 | GTA  | -     | -- | -- | IGR    | DEL | 0.200 | 12 | 3  |
| --       | chr11 | 19307989 | C    | T     | -- | -- | IGR    | SNP | 0.878 | 6  | 43 |
| NAV2     | chr11 | 19439724 | A    | T     | -- | -- | Intron | SNP | 0.176 | 61 | 13 |
| NAV2     | chr11 | 19441734 | C    | G     | -- | -- | Intron | SNP | 0.333 | 42 | 21 |
| NAV2     | chr11 | 19479608 | G    | C     | -- | -- | Intron | SNP | 0.263 | 42 | 15 |
| --       | chr11 | 20547886 | A    | C     | -- | -- | IGR    | SNP | 0.235 | 39 | 12 |
| --       | chr11 | 20592369 | T    | C     | -- | -- | IGR    | SNP | 0.100 | 27 | 3  |
| --       | chr11 | 20597524 | G    | C     | -- | -- | IGR    | SNP | 0.176 | 14 | 3  |
| NELL1    | chr11 | 20715636 | -    | CT    | -- | -- | Intron | INS | 0.194 | 29 | 7  |
| NELL1    | chr11 | 20778637 | C    | A     | -- | -- | Intron | SNP | 0.559 | 15 | 19 |
| NELL1    | chr11 | 21124062 | T    | C     | -- | -- | Intron | SNP | 0.310 | 29 | 13 |
| NELL1    | chr11 | 21465169 | C    | T     | -- | -- | Intron | SNP | 0.816 | 7  | 31 |
| NELL1    | chr11 | 21513443 | C    | T     | -- | -- | Intron | SNP | 0.130 | 20 | 3  |
| NELL1    | chr11 | 21515203 | G    | A     | -- | -- | Intron | SNP | 0.219 | 25 | 7  |
| NELL1    | chr11 | 21571153 | A    | G     | -- | -- | Intron | SNP | 0.923 | 2  | 24 |
| NELL1    | chr11 | 21572054 | C    | G     | -- | -- | Intron | SNP | 0.300 | 7  | 3  |
| --       | chr11 | 21656582 | CTA  | -     | -- | -- | IGR    | DEL | 0.148 | 22 | 4  |
| --       | chr11 | 21971219 | TG   | -     | -- | -- | IGR    | DEL | 0.129 | 27 | 4  |
| ANO5     | chr11 | 22280485 | C    | A     | -- | -- | Intron | SNP | 0.118 | 30 | 4  |
| ANO5     | chr11 | 22280486 | T    | C     | -- | -- | Intron | SNP | 0.118 | 30 | 4  |
| --       | chr11 | 22338585 | G    | C     | -- | -- | IGR    | SNP | 0.925 | 3  | 37 |
| --       | chr11 | 22340172 | C    | G     | -- | -- | IGR    | SNP | 0.389 | 22 | 14 |
| GAS2     | chr11 | 22776367 | G    | T     | -- | -- | Intron | SNP | 0.167 | 30 | 6  |
| --       | chr11 | 22964271 | C    | G     | -- | -- | IGR    | SNP | 0.304 | 32 | 14 |
| --       | chr11 | 23318223 | T    | C     | -- | -- | IGR    | SNP | 0.394 | 20 | 13 |
| --       | chr11 | 23721867 | C    | T     | -- | -- | IGR    | SNP | 0.324 | 23 | 11 |
| --       | chr11 | 23744567 | CGT  | -     | -- | -- | IGR    | DEL | 0.125 | 21 | 3  |
| --       | chr11 | 23836248 | C    | T     | -- | -- | IGR    | SNP | 0.143 | 18 | 3  |
| --       | chr11 | 24082594 | G    | A     | -- | -- | IGR    | SNP | 0.250 | 15 | 5  |
| --       | chr11 | 24413974 | G    | T     | -- | -- | IGR    | SNP | 0.300 | 28 | 12 |
| --       | chr11 | 24436946 | G    | A     | -- | -- | IGR    | SNP | 0.222 | 35 | 10 |
| LUZP2    | chr11 | 24552586 | TTTA | -     | -- | -- | Intron | DEL | 0.105 | 17 | 2  |
| LUZP2    | chr11 | 24644251 | A    | C     | -- | -- | Intron | SNP | 0.444 | 25 | 20 |
| --       | chr11 | 25350022 | T    | G     | -- | -- | IGR    | SNP | 0.143 | 24 | 4  |
| --       | chr11 | 25783151 | G    | T     | -- | -- | IGR    | SNP | 0.200 | 16 | 4  |
| --       | chr11 | 26013973 | G    | A     | -- | -- | IGR    | SNP | 0.881 | 5  | 37 |
| --       | chr11 | 26170140 | G    | T     | -- | -- | IGR    | SNP | 0.907 | 4  | 39 |
| --       | chr11 | 26909730 | G    | T     | -- | -- | IGR    | SNP | 0.840 | 4  | 21 |
| --       | chr11 | 26933591 | A    | T     | -- | -- | IGR    | SNP | 0.211 | 15 | 4  |
| BDNF-AS1 | chr11 | 27588688 | G    | C     | -- | -- | RNA    | SNP | 0.389 | 22 | 14 |
| BDNF-AS1 | chr11 | 27653658 | T    | G     | -- | -- | RNA    | SNP | 0.103 | 26 | 3  |
| KIF18A   | chr11 | 28080242 | G    | A     | -- | -- | Intron | SNP | 0.286 | 10 | 4  |
| METTL15  | chr11 | 28334421 | C    | T     | -- | -- | Intron | SNP | 0.887 | 6  | 47 |
| --       | chr11 | 28386325 | T    | C     | -- | -- | IGR    | SNP | 0.263 | 28 | 10 |
| --       | chr11 | 28701932 | G    | T     | -- | -- | IGR    | SNP | 0.182 | 36 | 8  |
| --       | chr11 | 29164491 | G    | A     | -- | -- | IGR    | SNP | 0.158 | 32 | 6  |
| --       | chr11 | 29241551 | T    | A     | -- | -- | IGR    | SNP | 0.864 | 3  | 19 |
| --       | chr11 | 29979846 | C    | A     | -- | -- | IGR    | SNP | 0.256 | 29 | 10 |
| --       | chr11 | 29985037 | G    | A     | -- | -- | IGR    | SNP | 0.238 | 32 | 10 |
| --       | chr11 | 30146080 | C    | G     | -- | -- | IGR    | SNP | 0.158 | 32 | 6  |
| --       | chr11 | 30157216 | C    | A     | -- | -- | IGR    | SNP | 0.234 | 36 | 11 |
| --       | chr11 | 30681045 | CAG  | -     | -- | -- | IGR    | DEL | 0.118 | 15 | 2  |
| --       | chr11 | 30730839 | -    | TC    | -- | -- | IGR    | INS | 0.132 | 33 | 5  |
| --       | chr11 | 31029542 | G    | T     | -- | -- | IGR    | SNP | 0.902 | 5  | 46 |
| --       | chr11 | 31064346 | C    | G     | -- | -- | IGR    | SNP | 0.900 | 5  | 45 |
| --       | chr11 | 31075791 | AG   | -     | -- | -- | IGR    | DEL | 0.174 | 19 | 4  |
| --       | chr11 | 31130130 | C    | A     | -- | -- | IGR    | SNP | 0.360 | 16 | 9  |
| DCDC1    | chr11 | 31317194 | T    | A     | -- | -- | Intron | SNP | 0.460 | 27 | 23 |
| DNAJC24  | chr11 | 31417157 | T    | G     | -- | -- | Intron | SNP | 0.586 | 12 | 17 |
| ELP4     | chr11 | 31540061 | C    | T     | -- | -- | Intron | SNP | 0.167 | 20 | 4  |
| ELP4     | chr11 | 31569268 | C    | G     | -- | -- | Intron | SNP | 0.160 | 21 | 4  |
| ELP4     | chr11 | 31677782 | G    | C     | -- | -- | Intron | SNP | 0.161 | 26 | 5  |
| --       | chr11 | 32244626 | T    | C     | -- | -- | IGR    | SNP | 0.316 | 26 | 12 |
| --       | chr11 | 33384476 | -    | CTT   | -- | -- | IGR    | INS | 0.182 | 18 | 4  |
| C11orf41 | chr11 | 33576321 | A    | T     | -- | -- | Intron | SNP | 0.185 | 53 | 12 |
| C11orf41 | chr11 | 33650668 | C    | G     | -- | -- | Intron | SNP | 0.333 | 8  | 4  |
| --       | chr11 | 34054393 | T    | C     | -- | -- | IGR    | SNP | 0.922 | 4  | 47 |
| NAT10    | chr11 | 34149826 | A    | T     | -- | -- | Intron | SNP | 0.192 | 21 | 5  |
| ABTB2    | chr11 | 34255819 | GA   | -     | -- | -- | Intron | DEL | 0.981 | 1  | 51 |
| --       | chr11 | 34874300 | T    | C     | -- | -- | IGR    | SNP | 0.912 | 5  | 52 |
| PDHX     | chr11 | 34983056 | T    | C     | -- | -- | Intron | SNP | 0.581 | 18 | 25 |
| --       | chr11 | 35034514 | G    | A     | -- | -- | IGR    | SNP | 0.111 | 32 | 4  |
| CD44     | chr11 | 35248451 | A    | T     | -- | -- | Intron | SNP | 0.154 | 22 | 4  |
| --       | chr11 | 35644414 | A    | C     | -- | -- | IGR    | SNP | 0.128 | 34 | 5  |
| --       | chr11 | 35938190 | -    | AAAAG | -- | -- | IGR    | INS | 0.462 | 19 | 18 |
| --       | chr11 | 35950360 | A    | T     | -- | -- | IGR    | SNP | 0.132 | 46 | 7  |
| --       | chr11 | 36861276 | A    | T     | -- | -- | IGR    | SNP | 0.250 | 24 | 8  |
| --       | chr11 | 37073143 | A    | C     | -- | -- | IGR    | SNP | 0.143 | 24 | 4  |

|                  |       |          |      |       |    |    |         |     |       |    |    |
|------------------|-------|----------|------|-------|----|----|---------|-----|-------|----|----|
| --               | chr11 | 37321151 | C    | G     | -- | -- | IGR     | SNP | 0.293 | 29 | 12 |
| --               | chr11 | 37370690 | -    | GTA   | -- | -- | IGR     | INS | 0.258 | 46 | 16 |
| --               | chr11 | 37449457 | TA   | -     | -- | -- | IGR     | DEL | 0.118 | 15 | 2  |
| --               | chr11 | 37451244 | -    | CTGTT | -- | -- | IGR     | INS | 0.133 | 13 | 2  |
| --               | chr11 | 37573492 | A    | G     | -- | -- | IGR     | SNP | 0.233 | 33 | 10 |
| --               | chr11 | 37691147 | A    | T     | -- | -- | IGR     | SNP | 0.333 | 30 | 15 |
| --               | chr11 | 38036350 | C    | T     | -- | -- | IGR     | SNP | 0.920 | 2  | 23 |
| --               | chr11 | 38122738 | A    | G     | -- | -- | IGR     | SNP | 0.200 | 28 | 7  |
| --               | chr11 | 38456353 | C    | A     | -- | -- | IGR     | SNP | 0.313 | 22 | 10 |
| --               | chr11 | 38628828 | C    | G     | -- | -- | IGR     | SNP | 0.622 | 14 | 23 |
| --               | chr11 | 38808600 | T    | C     | -- | -- | IGR     | SNP | 0.147 | 29 | 5  |
| --               | chr11 | 38887648 | -    | CTTTA | -- | -- | IGR     | INS | 0.500 | 7  | 7  |
| --               | chr11 | 39150000 | G    | C     | -- | -- | IGR     | SNP | 0.577 | 22 | 30 |
| --               | chr11 | 39952811 | G    | C     | -- | -- | IGR     | SNP | 0.919 | 3  | 34 |
| --               | chr11 | 39974569 | T    | A     | -- | -- | IGR     | SNP | 0.208 | 19 | 5  |
| --               | chr11 | 40084973 | C    | A     | -- | -- | IGR     | SNP | 0.310 | 20 | 9  |
| <i>LRRC4C</i>    | chr11 | 40245342 | C    | A     | -- | -- | Intron  | SNP | 0.314 | 24 | 11 |
| <i>LRRC4C</i>    | chr11 | 40256418 | C    | G     | -- | -- | Intron  | SNP | 0.867 | 6  | 39 |
| <i>LRRC4C</i>    | chr11 | 40266828 | C    | A     | -- | -- | Intron  | SNP | 0.568 | 16 | 21 |
| <i>LRRC4C</i>    | chr11 | 40278938 | T    | A     | -- | -- | Intron  | SNP | 0.184 | 31 | 7  |
| --               | chr11 | 40326912 | A    | G     | -- | -- | IGR     | SNP | 0.295 | 31 | 13 |
| --               | chr11 | 40578443 | G    | T     | -- | -- | IGR     | SNP | 0.567 | 13 | 17 |
| --               | chr11 | 40580586 | C    | A     | -- | -- | IGR     | SNP | 0.314 | 24 | 11 |
| --               | chr11 | 40586070 | A    | G     | -- | -- | IGR     | SNP | 0.184 | 31 | 7  |
| --               | chr11 | 40674046 | A    | G     | -- | -- | IGR     | SNP | 0.610 | 16 | 25 |
| --               | chr11 | 41109217 | G    | A     | -- | -- | IGR     | SNP | 0.233 | 23 | 7  |
| --               | chr11 | 41302685 | G    | C     | -- | -- | IGR     | SNP | 0.188 | 13 | 3  |
| --               | chr11 | 41341936 | G    | T     | -- | -- | IGR     | SNP | 0.109 | 41 | 5  |
| --               | chr11 | 41352145 | G    | C     | -- | -- | IGR     | SNP | 0.273 | 16 | 6  |
| --               | chr11 | 41437053 | A    | T     | -- | -- | IGR     | SNP | 0.243 | 28 | 9  |
| --               | chr11 | 41466285 | G    | T     | -- | -- | IGR     | SNP | 0.324 | 23 | 11 |
| --               | chr11 | 41488232 | A    | T     | -- | -- | IGR     | SNP | 0.292 | 17 | 7  |
| --               | chr11 | 41552855 | G    | A     | -- | -- | IGR     | SNP | 0.217 | 36 | 10 |
| --               | chr11 | 41676651 | TC   | -     | -- | -- | IGR     | DEL | 0.189 | 30 | 7  |
| --               | chr11 | 41676903 | C    | G     | -- | -- | IGR     | SNP | 0.286 | 15 | 6  |
| --               | chr11 | 41718553 | A    | G     | -- | -- | IGR     | SNP | 0.280 | 18 | 7  |
| --               | chr11 | 42057646 | C    | G     | -- | -- | IGR     | SNP | 0.590 | 16 | 23 |
| --               | chr11 | 42076906 | GTA  | -     | -- | -- | IGR     | DEL | 0.103 | 26 | 3  |
| --               | chr11 | 42203405 | A    | T     | -- | -- | IGR     | SNP | 0.188 | 39 | 9  |
| --               | chr11 | 42329871 | G    | A     | -- | -- | IGR     | SNP | 0.887 | 6  | 47 |
| --               | chr11 | 42356244 | -    | CAATA | -- | -- | IGR     | INS | 0.105 | 17 | 2  |
| --               | chr11 | 42691693 | G    | C     | -- | -- | IGR     | SNP | 0.907 | 5  | 49 |
| --               | chr11 | 42787678 | C    | A     | -- | -- | IGR     | SNP | 0.842 | 6  | 32 |
| --               | chr11 | 42975449 | C    | A     | -- | -- | IGR     | SNP | 0.250 | 12 | 4  |
| --               | chr11 | 43678992 | C    | T     | -- | -- | IGR     | SNP | 0.308 | 9  | 4  |
| <i>EXT2</i>      | chr11 | 44195961 | TTA  | -     | -- | -- | Intron  | DEL | 0.111 | 16 | 2  |
| <i>EXT2</i>      | chr11 | 44202128 | C    | A     | -- | -- | Intron  | SNP | 0.950 | 1  | 19 |
| --               | chr11 | 45033070 | GT   | -     | -- | -- | IGR     | DEL | 0.118 | 30 | 4  |
| <i>PRDM11</i>    | chr11 | 45123606 | G    | T     | -- | -- | Intron  | SNP | 0.150 | 17 | 3  |
| <i>PRDM11</i>    | chr11 | 45158579 | T    | A     | -- | -- | Intron  | SNP | 0.100 | 27 | 3  |
| --               | chr11 | 45433292 | C    | A     | -- | -- | IGR     | SNP | 0.294 | 36 | 15 |
| --               | chr11 | 45556835 | T    | A     | -- | -- | IGR     | SNP | 0.222 | 35 | 10 |
| <i>PHF21A</i>    | chr11 | 46136921 | T    | A     | -- | -- | Intron  | SNP | 0.279 | 31 | 12 |
| --               | chr11 | 46218507 | A    | T     | -- | -- | IGR     | SNP | 0.373 | 32 | 19 |
| <i>AMBRA1</i>    | chr11 | 46478361 | C    | A     | -- | -- | Intron  | SNP | 0.895 | 4  | 34 |
| <i>AMBRA1</i>    | chr11 | 46518371 | A    | G     | -- | -- | Intron  | SNP | 0.100 | 36 | 4  |
| <i>AMBRA1</i>    | chr11 | 46611394 | A    | C     | -- | -- | Intron  | SNP | 0.931 | 2  | 27 |
| <i>SPI1</i>      | chr11 | 47375720 | T    | C     | -- | -- | 3'Flank | SNP | 0.708 | 7  | 17 |
| --               | chr11 | 47422639 | G    | A     | -- | -- | IGR     | SNP | 0.857 | 3  | 18 |
| <i>FNBP4</i>     | chr11 | 47745090 | A    | G     | -- | -- | Intron  | SNP | 0.324 | 25 | 12 |
| <i>PTPRJ</i>     | chr11 | 48072666 | G    | T     | -- | -- | Intron  | SNP | 0.231 | 10 | 3  |
| <i>PTPRJ</i>     | chr11 | 48105926 | G    | A     | -- | -- | Intron  | SNP | 0.121 | 29 | 4  |
| <i>PTPRJ</i>     | chr11 | 48136011 | G    | A     | -- | -- | Intron  | SNP | 0.154 | 22 | 4  |
| <i>PTPRJ</i>     | chr11 | 48165887 | A    | G     | -- | -- | Intron  | SNP | 0.184 | 31 | 7  |
| --               | chr11 | 49073948 | G    | C     | -- | -- | IGR     | SNP | 0.625 | 3  | 5  |
| --               | chr11 | 49487832 | C    | G     | -- | -- | IGR     | SNP | 0.250 | 15 | 5  |
| --               | chr11 | 49489638 | T    | C     | -- | -- | IGR     | SNP | 0.147 | 29 | 5  |
| --               | chr11 | 49523812 | G    | A     | -- | -- | IGR     | SNP | 0.750 | 2  | 6  |
| <i>LOC440040</i> | chr11 | 49631952 | A    | T     | -- | -- | RNA     | SNP | 0.844 | 5  | 27 |
| <i>LOC440040</i> | chr11 | 49716792 | T    | C     | -- | -- | RNA     | SNP | 0.115 | 23 | 3  |
| <i>LOC440040</i> | chr11 | 49741675 | G    | T     | -- | -- | RNA     | SNP | 0.571 | 3  | 4  |
| <i>LOC440040</i> | chr11 | 49741676 | C    | T     | -- | -- | RNA     | SNP | 0.625 | 3  | 5  |
| <i>LOC440040</i> | chr11 | 49784167 | T    | A     | -- | -- | RNA     | SNP | 0.182 | 18 | 4  |
| <i>LOC440040</i> | chr11 | 49820197 | A    | C     | -- | -- | RNA     | SNP | 0.889 | 2  | 16 |
| --               | chr11 | 49882745 | G    | T     | -- | -- | IGR     | SNP | 0.122 | 36 | 5  |
| --               | chr11 | 49882746 | A    | T     | -- | -- | IGR     | SNP | 0.125 | 35 | 5  |
| --               | chr11 | 49884841 | TTCC | -     | -- | -- | IGR     | DEL | 0.125 | 21 | 3  |
| --               | chr11 | 49972763 | TTG  | -     | -- | -- | IGR     | DEL | 0.105 | 17 | 2  |
| --               | chr11 | 50154712 | -    | CTGTT | -- | -- | IGR     | INS | 0.158 | 16 | 3  |
| --               | chr11 | 50159007 | C    | T     | -- | -- | IGR     | SNP | 0.933 | 2  | 28 |

|             |       |          |       |        |        |       |                 |     |       |     |     |
|-------------|-------|----------|-------|--------|--------|-------|-----------------|-----|-------|-----|-----|
| --          | chr11 | 50209538 | GC    | -      | --     | --    | IGR             | DEL | 0.235 | 13  | 4   |
| --          | chr11 | 50304027 | G     | A      | --     | --    | IGR             | SNP | 0.267 | 11  | 4   |
| --          | chr11 | 50490315 | T     | C      | --     | --    | IGR             | SNP | 0.875 | 4   | 28  |
| --          | chr11 | 50566984 | C     | T      | --     | --    | IGR             | SNP | 0.935 | 2   | 29  |
| --          | chr11 | 51312537 | G     | T      | --     | --    | IGR             | SNP | 0.696 | 7   | 16  |
| --          | chr11 | 51376205 | G     | A      | --     | --    | IGR             | SNP | 0.667 | 2   | 4   |
| --          | chr11 | 51430768 | G     | A      | --     | --    | IGR             | SNP | 0.103 | 35  | 4   |
| --          | chr11 | 51518408 | G     | A      | --     | --    | IGR             | SNP | 0.870 | 3   | 20  |
| --          | chr11 | 54992797 | A     | G      | --     | --    | IGR             | SNP | 0.107 | 25  | 3   |
| --          | chr11 | 55106773 | G     | T      | --     | --    | IGR             | SNP | 0.278 | 13  | 5   |
| --          | chr11 | 55228062 | T     | C      | --     | --    | IGR             | SNP | 0.214 | 11  | 3   |
| --          | chr11 | 55229114 | A     | C      | --     | --    | IGR             | SNP | 0.400 | 6   | 4   |
| --          | chr11 | 55458672 | G     | A      | --     | --    | IGR             | SNP | 0.200 | 16  | 4   |
| --          | chr11 | 55458685 | T     | C      | --     | --    | IGR             | SNP | 0.214 | 11  | 3   |
| --          | chr11 | 55518471 | C     | T      | --     | --    | IGR             | SNP | 0.889 | 1   | 8   |
| --          | chr11 | 55590687 | A     | G      | --     | --    | IGR             | SNP | 0.500 | 4   | 4   |
| --          | chr11 | 55635552 | A     | G      | --     | --    | IGR             | SNP | 0.121 | 29  | 4   |
| --          | chr11 | 55885285 | C     | T      | --     | --    | IGR             | SNP | 0.125 | 28  | 4   |
| --          | chr11 | 56102456 | TG    | -      | --     | --    | IGR             | DEL | 0.158 | 16  | 3   |
| OR8U8       | chr11 | 56212809 | AAAAC | -      | --     | --    | Intron          | DEL | 0.111 | 16  | 2   |
| --          | chr11 | 56868963 | GAC   | -      | --     | --    | IGR             | DEL | 0.120 | 22  | 3   |
| --          | chr11 | 57171053 | A     | G      | --     | --    | IGR             | SNP | 0.107 | 25  | 3   |
| OR9Q1       | chr11 | 57871422 | T     | C      | --     | --    | Intron          | SNP | 0.367 | 19  | 11  |
| --          | chr11 | 58061584 | T     | A      | --     | --    | IGR             | SNP | 0.391 | 14  | 9   |
| --          | chr11 | 58261573 | C     | G      | --     | --    | IGR             | SNP | 0.368 | 12  | 7   |
| LOC283194   | chr11 | 58742763 | T     | A      | --     | --    | RNA             | SNP | 0.176 | 14  | 3   |
| LOC283194   | chr11 | 58742772 | A     | G      | --     | --    | RNA             | SNP | 0.214 | 11  | 3   |
| LOC283194   | chr11 | 58749371 | G     | T      | --     | --    | RNA             | SNP | 0.387 | 19  | 12  |
| LOC283194   | chr11 | 58767944 | T     | C      | --     | --    | RNA             | SNP | 0.429 | 12  | 9   |
| GIF         | chr11 | 59599491 | C     | G      | --     | --    | Intron          | SNP | 0.931 | 2   | 27  |
| MS4A14      | chr11 | 60180922 | T     | A      | --     | --    | Intron          | SNP | 0.111 | 24  | 3   |
| LINC00301   | chr11 | 60383055 | G     | A      | --     | --    | 5'Flank         | SNP | 0.868 | 5   | 33  |
| MS4A15      | chr11 | 60524871 | C     | G      | --     | --    | Intron          | SNP | 0.150 | 17  | 3   |
| --          | chr11 | 60583639 | C     | G      | --     | --    | IGR             | SNP | 0.130 | 20  | 3   |
| --          | chr11 | 60583656 | C     | A      | --     | --    | IGR             | SNP | 0.130 | 20  | 3   |
| --          | chr11 | 60868322 | ACATT | -      | --     | --    | IGR             | DEL | 0.105 | 17  | 2   |
| --          | chr11 | 61217053 | G     | T      | --     | --    | IGR             | SNP | 0.214 | 11  | 3   |
| SYT7        | chr11 | 61329228 | C     | T      | --     | --    | Intron          | SNP | 0.793 | 6   | 23  |
| --          | chr11 | 62085798 | C     | T      | --     | --    | IGR             | SNP | 0.875 | 3   | 21  |
| AHNAK       | chr11 | 62243073 | A     | T      | --     | --    | Intron          | SNP | 0.444 | 5   | 4   |
| INTS5       | chr11 | 62416013 | G     | T      | C1539A | S513R | Missense_mutati | SNP | 0.224 | 38  | 11  |
| HNRNPUL2-B  | chr11 | 62461667 | C     | T      | --     | --    | RNA             | SNP | 0.200 | 12  | 3   |
| ZBTB3       | chr11 | 62519421 | AT    | -      | --     | --    | 3'UTR           | DEL | 0.120 | 22  | 3   |
| SLC22A8     | chr11 | 62783107 | T     | A      | --     | --    | Intron          | SNP | 0.120 | 22  | 3   |
| --          | chr11 | 63082190 | T     | A      | --     | --    | IGR             | SNP | 0.400 | 6   | 4   |
| --          | chr11 | 63082843 | G     | A      | --     | --    | IGR             | SNP | 0.188 | 13  | 3   |
| MACROD1     | chr11 | 63798968 | G     | T      | --     | --    | Intron          | SNP | 0.214 | 11  | 3   |
| SLC22A11    | chr11 | 64325122 | G     | T      | --     | --    | Intron          | SNP | 0.138 | 25  | 4   |
| SLC22A11    | chr11 | 64333622 | G     | T      | --     | --    | Intron          | SNP | 0.980 | 2   | 100 |
| ATG2A       | chr11 | 64676851 | T     | C      | --     | --    | Intron          | SNP | 0.957 | 5   | 111 |
| --          | chr11 | 64733978 | G     | A      | --     | --    | IGR             | SNP | 0.100 | 72  | 8   |
| --          | chr11 | 64927510 | G     | A      | --     | --    | IGR             | SNP | 0.957 | 2   | 44  |
| SLC25A45    | chr11 | 65141838 | T     | A      | --     | --    | 3'Flank         | SNP | 0.110 | 113 | 14  |
| FRMD8       | chr11 | 65158599 | C     | T      | --     | --    | Intron          | SNP | 0.262 | 104 | 37  |
| MALAT1      | chr11 | 65266082 | C     | G      | --     | --    | RNA             | SNP | 0.972 | 3   | 105 |
| SCYL1       | chr11 | 65293385 | T     | A      | --     | --    | Intron          | SNP | 0.120 | 147 | 20  |
| SCYL1       | chr11 | 65293939 | C     | T      | --     | --    | Intron          | SNP | 0.227 | 136 | 40  |
| RELA        | chr11 | 65430134 | A     | C      | --     | --    | Intron          | SNP | 0.216 | 29  | 8   |
| --          | chr11 | 65571773 | G     | C      | --     | --    | IGR             | SNP | 0.133 | 111 | 17  |
| EIF1AD      | chr11 | 65763475 | C     | A      | --     | --    | 3'Flank         | SNP | 0.171 | 29  | 6   |
| PACS1       | chr11 | 65839415 | G     | A      | --     | --    | Intron          | SNP | 0.196 | 82  | 20  |
| PACS1       | chr11 | 65947407 | C     | T      | --     | --    | Intron          | SNP | 0.988 | 1   | 79  |
| PACS1       | chr11 | 65947473 | C     | T      | --     | --    | Intron          | SNP | 0.978 | 2   | 89  |
| PACS1       | chr11 | 66011505 | T     | G      | --     | --    | 3'UTR           | SNP | 0.183 | 125 | 28  |
| NPAS4       | chr11 | 66189046 | A     | G      | --     | --    | Intron          | SNP | 0.100 | 90  | 10  |
| ACTN3       | chr11 | 66319234 | C     | T      | --     | --    | Intron          | SNP | 0.155 | 93  | 17  |
| SPTBN2      | chr11 | 66470408 | C     | A      | --     | --    | Intron          | SNP | 0.429 | 8   | 6   |
| PC          | chr11 | 66686378 | G     | C      | --     | --    | Intron          | SNP | 0.948 | 5   | 91  |
| --          | chr11 | 66752649 | G     | T      | --     | --    | IGR             | SNP | 0.122 | 108 | 15  |
| --          | chr11 | 66845354 | C     | A      | --     | --    | IGR             | SNP | 0.100 | 63  | 7   |
| KDM2A       | chr11 | 67016380 | G     | C      | --     | --    | Intron          | SNP | 0.103 | 113 | 13  |
| LOC10013098 | chr11 | 67108789 | -     | AAAAAT | --     | --    | RNA             | INS | 0.357 | 26  | 15  |
| TBC1D10C    | chr11 | 67171845 | G     | C      | --     | --    | Intron          | SNP | 0.167 | 90  | 18  |
| PITPNM1     | chr11 | 67266337 | G     | C      | --     | --    | Intron          | SNP | 0.126 | 153 | 22  |
| --          | chr11 | 67495775 | C     | G      | --     | --    | IGR             | SNP | 0.957 | 4   | 89  |
| --          | chr11 | 67605741 | T     | G      | --     | --    | IGR             | SNP | 0.103 | 61  | 7   |
| --          | chr11 | 67736051 | C     | A      | --     | --    | IGR             | SNP | 0.263 | 14  | 5   |
| SUV420H1    | chr11 | 67961500 | G     | T      | --     | --    | Intron          | SNP | 0.176 | 98  | 21  |
| LRP5        | chr11 | 68081269 | C     | T      | --     | --    | Intron          | SNP | 0.973 | 4   | 146 |
| LRP5        | chr11 | 68106172 | C     | G      | --     | --    | Intron          | SNP | 0.965 | 5   | 136 |

|          |       |          |         |     |       |      |                 |     |       |     |     |
|----------|-------|----------|---------|-----|-------|------|-----------------|-----|-------|-----|-----|
| PPP6R3   | chr11 | 68239880 | C       | T   | --    | --   | Intron          | SNP | 0.992 | 3   | 353 |
| PPP6R3   | chr11 | 68282578 | A       | C   | --    | --   | Intron          | SNP | 0.124 | 205 | 29  |
| --       | chr11 | 68434613 | G       | A   | --    | --   | IGR             | SNP | 0.179 | 23  | 5   |
| --       | chr11 | 68716412 | T       | C   | --    | --   | IGR             | SNP | 0.115 | 262 | 34  |
| TPCN2    | chr11 | 68835849 | G       | C   | --    | --   | Intron          | SNP | 0.133 | 52  | 8   |
| --       | chr11 | 68872103 | G       | T   | --    | --   | IGR             | SNP | 0.180 | 287 | 63  |
| --       | chr11 | 68953159 | G       | T   | --    | --   | IGR             | SNP | 0.155 | 82  | 15  |
| FGF3     | chr11 | 69628448 | A       | C   | --    | --   | Intron          | SNP | 0.250 | 15  | 5   |
| ANO1     | chr11 | 70015463 | T       | G   | --    | --   | Intron          | SNP | 0.115 | 139 | 18  |
| SHANK2   | chr11 | 70721960 | C       | A   | --    | --   | Intron          | SNP | 0.286 | 10  | 4   |
| --       | chr11 | 70960454 | G       | A   | --    | --   | IGR             | SNP | 0.560 | 11  | 14  |
| --       | chr11 | 71298938 | C       | T   | --    | --   | IGR             | SNP | 0.115 | 23  | 3   |
| --       | chr11 | 71328334 | C       | G   | --    | --   | IGR             | SNP | 0.208 | 19  | 5   |
| --       | chr11 | 71347573 | A       | T   | --    | --   | IGR             | SNP | 0.500 | 13  | 13  |
| --       | chr11 | 71368970 | G       | C   | --    | --   | IGR             | SNP | 0.267 | 11  | 4   |
| --       | chr11 | 71375647 | G       | C   | --    | --   | IGR             | SNP | 0.167 | 20  | 4   |
| --       | chr11 | 71398671 | T       | A   | --    | --   | IGR             | SNP | 0.156 | 27  | 5   |
| --       | chr11 | 71405537 | G       | C   | --    | --   | IGR             | SNP | 0.258 | 23  | 8   |
| --       | chr11 | 71408639 | C       | T   | --    | --   | IGR             | SNP | 0.235 | 13  | 4   |
| --       | chr11 | 71410552 | TGGCA   | -   | --    | --   | IGR             | DEL | 0.133 | 13  | 2   |
| --       | chr11 | 71413082 | C       | G   | --    | --   | IGR             | SNP | 0.214 | 33  | 9   |
| --       | chr11 | 71413123 | G       | A   | --    | --   | IGR             | SNP | 0.196 | 37  | 9   |
| --       | chr11 | 71429822 | G       | C   | --    | --   | IGR             | SNP | 0.303 | 23  | 10  |
| --       | chr11 | 71445248 | -       | TC  | --    | --   | IGR             | INS | 0.103 | 26  | 3   |
| --       | chr11 | 71450059 | ATCT    | -   | --    | --   | IGR             | DEL | 0.115 | 23  | 3   |
| --       | chr11 | 71462062 | A       | G   | --    | --   | IGR             | SNP | 0.190 | 17  | 4   |
| --       | chr11 | 71495091 | C       | T   | --    | --   | IGR             | SNP | 0.147 | 29  | 5   |
| --       | chr11 | 71495975 | C       | T   | --    | --   | IGR             | SNP | 0.296 | 19  | 8   |
| FAM86C1  | chr11 | 71507620 | C       | T   | --    | --   | Intron          | SNP | 0.148 | 23  | 4   |
| FAM86C1  | chr11 | 71507621 | A       | G   | --    | --   | Intron          | SNP | 0.138 | 25  | 4   |
| --       | chr11 | 71516604 | -       | CA  | --    | --   | IGR             | INS | 0.118 | 30  | 4   |
| NUMA1    | chr11 | 71739497 | A       | T   | --    | --   | Intron          | SNP | 0.250 | 12  | 4   |
| --       | chr11 | 71910681 | G       | C   | --    | --   | IGR             | SNP | 0.319 | 32  | 15  |
| FOLR2    | chr11 | 71931977 | A       | C   | A214C | T72P | Missense_mutati | SNP | 0.333 | 8   | 4   |
| CLPB     | chr11 | 72106347 | G       | C   | --    | --   | Intron          | SNP | 0.361 | 23  | 13  |
| PDE2A    | chr11 | 72303175 | C       | T   | --    | --   | Intron          | SNP | 0.105 | 34  | 4   |
| PDE2A    | chr11 | 72378928 | A       | G   | --    | --   | Intron          | SNP | 0.233 | 23  | 7   |
| FAM168A  | chr11 | 73142396 | A       | C   | --    | --   | Intron          | SNP | 0.154 | 22  | 4   |
| C2CD3    | chr11 | 73745588 | C       | G   | --    | --   | 3'UTR           | SNP | 0.824 | 6   | 28  |
| C2CD3    | chr11 | 73746375 | C       | T   | --    | --   | Intron          | SNP | 0.920 | 4   | 46  |
| PPME1    | chr11 | 73922012 | C       | G   | --    | --   | Intron          | SNP | 0.857 | 4   | 24  |
| CHRD2    | chr11 | 74442220 | G       | T   | --    | --   | 5'Flank         | SNP | 0.458 | 13  | 11  |
| --       | chr11 | 74447153 | A       | T   | --    | --   | IGR             | SNP | 0.158 | 16  | 3   |
| --       | chr11 | 75256999 | C       | T   | --    | --   | IGR             | SNP | 0.840 | 4   | 21  |
| --       | chr11 | 75422086 | -       | ATG | --    | --   | IGR             | INS | 0.176 | 14  | 3   |
| UVRAG    | chr11 | 75717731 | A       | G   | --    | --   | Intron          | SNP | 0.235 | 13  | 4   |
| UVRAG    | chr11 | 75750979 | CATT    | -   | --    | --   | Intron          | DEL | 0.458 | 13  | 11  |
| UVRAG    | chr11 | 75800416 | C       | T   | --    | --   | Intron          | SNP | 0.929 | 2   | 26  |
| C11orf30 | chr11 | 76214368 | G       | A   | --    | --   | Intron          | SNP | 0.214 | 11  | 3   |
| --       | chr11 | 76486629 | G       | A   | --    | --   | IGR             | SNP | 0.759 | 7   | 22  |
| --       | chr11 | 76559754 | AAAAAAG | -   | --    | --   | IGR             | DEL | 0.111 | 16  | 2   |
| PAK1     | chr11 | 77034259 | C       | G   | --    | --   | 3'UTR           | SNP | 0.793 | 6   | 23  |
| PAK1     | chr11 | 77092237 | A       | G   | --    | --   | Intron          | SNP | 0.182 | 18  | 4   |
| PAK1     | chr11 | 77180102 | C       | A   | --    | --   | Intron          | SNP | 0.343 | 23  | 12  |
| --       | chr11 | 77282989 | G       | C   | --    | --   | IGR             | SNP | 0.129 | 27  | 4   |
| INTS4    | chr11 | 77606852 | A       | G   | --    | --   | Intron          | SNP | 0.148 | 23  | 4   |
| INTS4    | chr11 | 77666218 | C       | G   | --    | --   | Intron          | SNP | 0.769 | 3   | 10  |
| GAB2     | chr11 | 78005910 | G       | A   | --    | --   | Intron          | SNP | 0.333 | 12  | 6   |
| GAB2     | chr11 | 78005930 | -       | CA  | --    | --   | Intron          | INS | 0.353 | 11  | 6   |
| GAB2     | chr11 | 78005944 | T       | G   | --    | --   | Intron          | SNP | 0.375 | 10  | 6   |
| GAB2     | chr11 | 78073127 | GT      | -   | --    | --   | Intron          | DEL | 0.138 | 25  | 4   |
| ODZ4     | chr11 | 78451861 | C       | A   | --    | --   | Intron          | SNP | 0.500 | 16  | 16  |
| ODZ4     | chr11 | 78451862 | T       | C   | --    | --   | Intron          | SNP | 0.500 | 16  | 16  |
| ODZ4     | chr11 | 78602227 | A       | T   | --    | --   | Intron          | SNP | 0.258 | 23  | 8   |
| ODZ4     | chr11 | 78876045 | C       | T   | --    | --   | Intron          | SNP | 0.143 | 24  | 4   |
| --       | chr11 | 79247251 | G       | A   | --    | --   | IGR             | SNP | 0.394 | 20  | 13  |
| --       | chr11 | 79517694 | A       | T   | --    | --   | IGR             | SNP | 0.294 | 12  | 5   |
| --       | chr11 | 79668247 | T       | A   | --    | --   | IGR             | SNP | 0.500 | 17  | 17  |
| --       | chr11 | 79964322 | C       | T   | --    | --   | IGR             | SNP | 0.389 | 11  | 7   |
| --       | chr11 | 79970858 | C       | T   | --    | --   | IGR             | SNP | 0.333 | 14  | 7   |
| --       | chr11 | 80564546 | G       | T   | --    | --   | IGR             | SNP | 0.412 | 20  | 14  |
| --       | chr11 | 80658104 | T       | C   | --    | --   | IGR             | SNP | 0.400 | 12  | 8   |
| --       | chr11 | 80988091 | C       | T   | --    | --   | IGR             | SNP | 0.387 | 19  | 12  |
| --       | chr11 | 81348907 | T       | A   | --    | --   | IGR             | SNP | 0.214 | 11  | 3   |
| --       | chr11 | 81497924 | A       | G   | --    | --   | IGR             | SNP | 0.485 | 17  | 16  |
| --       | chr11 | 81551538 | G       | A   | --    | --   | IGR             | SNP | 0.412 | 10  | 7   |
| --       | chr11 | 81606055 | ACC     | -   | --    | --   | IGR             | DEL | 0.107 | 25  | 3   |
| --       | chr11 | 81793046 | G       | T   | --    | --   | IGR             | SNP | 0.261 | 17  | 6   |
| --       | chr11 | 81992301 | C       | T   | --    | --   | IGR             | SNP | 0.462 | 7   | 6   |
| --       | chr11 | 82852003 | C       | T   | --    | --   | IGR             | SNP | 0.853 | 5   | 29  |

|                  |       |           |      |   |    |    |        |     |       |    |    |
|------------------|-------|-----------|------|---|----|----|--------|-----|-------|----|----|
| <i>DLG2</i>      | chr11 | 83410583  | C    | A | -- | -- | Intron | SNP | 0.267 | 11 | 4  |
| <i>DLG2</i>      | chr11 | 83541809  | C    | T | -- | -- | Intron | SNP | 0.909 | 3  | 30 |
| <i>DLG2</i>      | chr11 | 83619058  | T    | C | -- | -- | Intron | SNP | 0.828 | 5  | 24 |
| <i>DLG2</i>      | chr11 | 83820374  | G    | A | -- | -- | Intron | SNP | 0.138 | 25 | 4  |
| <i>DLG2</i>      | chr11 | 83912639  | TA   | - | -- | -- | Intron | DEL | 0.105 | 17 | 2  |
| <i>DLG2</i>      | chr11 | 84183077  | G    | T | -- | -- | Intron | SNP | 0.467 | 16 | 14 |
| <i>DLG2</i>      | chr11 | 84793770  | C    | T | -- | -- | Intron | SNP | 0.308 | 9  | 4  |
| <i>DLG2</i>      | chr11 | 85104707  | A    | G | -- | -- | Intron | SNP | 0.115 | 23 | 3  |
| <i>SYTL2</i>     | chr11 | 85463539  | G    | A | -- | -- | Intron | SNP | 0.275 | 29 | 11 |
| --               | chr11 | 85788948  | A    | G | -- | -- | IGR    | SNP | 0.789 | 4  | 15 |
| --               | chr11 | 86143156  | C    | T | -- | -- | IGR    | SNP | 0.783 | 5  | 18 |
| --               | chr11 | 86143762  | C    | T | -- | -- | IGR    | SNP | 0.789 | 4  | 15 |
| <i>ME3</i>       | chr11 | 86249961  | C    | T | -- | -- | Intron | SNP | 0.447 | 21 | 17 |
| --               | chr11 | 86419805  | G    | A | -- | -- | IGR    | SNP | 0.316 | 26 | 12 |
| --               | chr11 | 86481325  | A    | T | -- | -- | IGR    | SNP | 0.188 | 13 | 3  |
| --               | chr11 | 87056495  | A    | T | -- | -- | IGR    | SNP | 0.333 | 6  | 3  |
| --               | chr11 | 87157070  | G    | T | -- | -- | IGR    | SNP | 0.750 | 7  | 21 |
| --               | chr11 | 87363659  | T    | A | -- | -- | IGR    | SNP | 0.200 | 12 | 3  |
| --               | chr11 | 87455653  | G    | C | -- | -- | IGR    | SNP | 0.414 | 17 | 12 |
| --               | chr11 | 87585580  | T    | A | -- | -- | IGR    | SNP | 1.000 | 0  | 5  |
| --               | chr11 | 87589097  | CAT  | - | -- | -- | IGR    | DEL | 0.118 | 15 | 2  |
| --               | chr11 | 87780338  | TC   | - | -- | -- | IGR    | DEL | 0.103 | 26 | 3  |
| --               | chr11 | 87955186  | T    | C | -- | -- | IGR    | SNP | 0.176 | 14 | 3  |
| --               | chr11 | 87955192  | C    | T | -- | -- | IGR    | SNP | 0.176 | 14 | 3  |
| --               | chr11 | 88004346  | G    | T | -- | -- | IGR    | SNP | 0.520 | 12 | 13 |
| <i>GRM5</i>      | chr11 | 88582312  | GTA  | - | -- | -- | Intron | DEL | 0.115 | 23 | 3  |
| <i>GRM5</i>      | chr11 | 88635323  | TG   | - | -- | -- | Intron | DEL | 0.120 | 22 | 3  |
| <i>TYR</i>       | chr11 | 88938840  | T    | A | -- | -- | Intron | SNP | 0.652 | 8  | 15 |
| <i>TYR</i>       | chr11 | 88942274  | C    | T | -- | -- | Intron | SNP | 0.132 | 33 | 5  |
| --               | chr11 | 89051898  | A    | G | -- | -- | IGR    | SNP | 0.286 | 15 | 6  |
| --               | chr11 | 89323806  | A    | C | -- | -- | IGR    | SNP | 0.905 | 2  | 19 |
| --               | chr11 | 89356960  | ATG  | - | -- | -- | IGR    | DEL | 0.107 | 25 | 3  |
| <i>FOLH1B</i>    | chr11 | 89407146  | T    | C | -- | -- | Intron | SNP | 0.278 | 13 | 5  |
| --               | chr11 | 89516803  | T    | G | -- | -- | IGR    | SNP | 0.875 | 1  | 7  |
| <i>LOC399940</i> | chr11 | 89718535  | G    | T | -- | -- | RNA    | SNP | 0.500 | 3  | 3  |
| --               | chr11 | 89812534  | C    | G | -- | -- | IGR    | SNP | 1.000 | 0  | 5  |
| --               | chr11 | 89827465  | G    | T | -- | -- | IGR    | SNP | 0.308 | 9  | 4  |
| --               | chr11 | 90221788  | AAAT | - | -- | -- | IGR    | DEL | 0.111 | 16 | 2  |
| --               | chr11 | 90538921  | A    | C | -- | -- | IGR    | SNP | 0.909 | 2  | 20 |
| --               | chr11 | 90591206  | T    | G | -- | -- | IGR    | SNP | 0.188 | 13 | 3  |
| --               | chr11 | 90618593  | T    | A | -- | -- | IGR    | SNP | 0.813 | 6  | 26 |
| --               | chr11 | 90762706  | T    | A | -- | -- | IGR    | SNP | 0.500 | 2  | 2  |
| --               | chr11 | 90796948  | C    | T | -- | -- | IGR    | SNP | 0.308 | 9  | 4  |
| --               | chr11 | 90796965  | T    | C | -- | -- | IGR    | SNP | 0.364 | 7  | 4  |
| --               | chr11 | 90803877  | A    | C | -- | -- | IGR    | SNP | 0.862 | 4  | 25 |
| --               | chr11 | 90888070  | T    | C | -- | -- | IGR    | SNP | 0.933 | 1  | 14 |
| --               | chr11 | 90951625  | C    | T | -- | -- | IGR    | SNP | 0.500 | 14 | 14 |
| --               | chr11 | 91304676  | A    | G | -- | -- | IGR    | SNP | 0.417 | 14 | 10 |
| --               | chr11 | 91890152  | C    | T | -- | -- | IGR    | SNP | 0.167 | 20 | 4  |
| --               | chr11 | 91890180  | G    | A | -- | -- | IGR    | SNP | 0.138 | 25 | 4  |
| --               | chr11 | 91970938  | G    | A | -- | -- | IGR    | SNP | 0.633 | 11 | 19 |
| <i>FAT3</i>      | chr11 | 92239879  | A    | T | -- | -- | Intron | SNP | 0.407 | 16 | 11 |
| <i>SLC36A4</i>   | chr11 | 92909900  | C    | T | -- | -- | Intron | SNP | 0.214 | 11 | 3  |
| <i>HEPHL1</i>    | chr11 | 93761490  | T    | C | -- | -- | Intron | SNP | 0.378 | 23 | 14 |
| <i>PIWIL4</i>    | chr11 | 94305870  | A    | G | -- | -- | Intron | SNP | 0.103 | 26 | 3  |
| --               | chr11 | 94361713  | T    | G | -- | -- | IGR    | SNP | 0.773 | 5  | 17 |
| --               | chr11 | 94644168  | C    | G | -- | -- | IGR    | SNP | 0.818 | 8  | 36 |
| --               | chr11 | 94793596  | C    | A | -- | -- | IGR    | SNP | 0.125 | 28 | 4  |
| --               | chr11 | 95078082  | C    | T | -- | -- | IGR    | SNP | 0.227 | 34 | 10 |
| --               | chr11 | 95148328  | T    | A | -- | -- | IGR    | SNP | 0.227 | 17 | 5  |
| <i>MTMR2</i>     | chr11 | 95607564  | G    | C | -- | -- | Intron | SNP | 1.000 | 0  | 8  |
| <i>MAML2</i>     | chr11 | 95880973  | G    | A | -- | -- | Intron | SNP | 0.273 | 24 | 9  |
| <i>MAML2</i>     | chr11 | 95880974  | G    | T | -- | -- | Intron | SNP | 0.257 | 26 | 9  |
| --               | chr11 | 96208882  | A    | T | -- | -- | IGR    | SNP | 0.556 | 12 | 15 |
| --               | chr11 | 96822288  | T    | C | -- | -- | IGR    | SNP | 0.231 | 10 | 3  |
| --               | chr11 | 97092934  | T    | C | -- | -- | IGR    | SNP | 0.267 | 22 | 8  |
| --               | chr11 | 97762111  | G    | C | -- | -- | IGR    | SNP | 0.846 | 4  | 22 |
| --               | chr11 | 98159527  | C    | G | -- | -- | IGR    | SNP | 0.800 | 6  | 24 |
| --               | chr11 | 98441685  | G    | T | -- | -- | IGR    | SNP | 0.750 | 1  | 3  |
| --               | chr11 | 98650179  | A    | G | -- | -- | IGR    | SNP | 0.900 | 2  | 18 |
| <i>CNTN5</i>     | chr11 | 98977580  | C    | T | -- | -- | Intron | SNP | 0.543 | 16 | 19 |
| <i>CNTN5</i>     | chr11 | 99155177  | G    | T | -- | -- | Intron | SNP | 0.519 | 13 | 14 |
| <i>CNTN5</i>     | chr11 | 99163217  | G    | A | -- | -- | Intron | SNP | 0.167 | 15 | 3  |
| <i>CNTN5</i>     | chr11 | 99259187  | C    | G | -- | -- | Intron | SNP | 0.813 | 3  | 13 |
| <i>CNTN5</i>     | chr11 | 99260963  | C    | T | -- | -- | Intron | SNP | 0.370 | 17 | 10 |
| <i>CNTN5</i>     | chr11 | 99402439  | G    | C | -- | -- | Intron | SNP | 0.900 | 2  | 18 |
| <i>CNTN5</i>     | chr11 | 99434294  | T    | A | -- | -- | Intron | SNP | 0.903 | 3  | 28 |
| <i>CNTN5</i>     | chr11 | 99834357  | T    | G | -- | -- | Intron | SNP | 0.158 | 16 | 3  |
| <i>CNTN5</i>     | chr11 | 100149249 | T    | A | -- | -- | Intron | SNP | 0.107 | 25 | 3  |
| --               | chr11 | 100347576 | C    | G | -- | -- | IGR    | SNP | 0.250 | 9  | 3  |

|                   |       |           |     |        |                       |                 |         |       |       |    |    |
|-------------------|-------|-----------|-----|--------|-----------------------|-----------------|---------|-------|-------|----|----|
| --                | chr11 | 100361016 | C   | T      | --                    | --              | IGR     | SNP   | 0.750 | 3  | 9  |
| --                | chr11 | 100362595 | -   | AGGAGG | --                    | --              | IGR     | INS   | 0.143 | 12 | 2  |
| --                | chr11 | 100378120 | T   | C      | --                    | --              | IGR     | SNP   | 0.550 | 9  | 11 |
| --                | chr11 | 100450808 | C   | T      | --                    | --              | IGR     | SNP   | 0.783 | 5  | 18 |
| --                | chr11 | 100527203 | A   | G      | --                    | --              | IGR     | SNP   | 0.214 | 11 | 3  |
| --                | chr11 | 101634680 | A   | T      | --                    | --              | IGR     | SNP   | 0.370 | 17 | 10 |
| --                | chr11 | 101759652 | G   | A      | --                    | --              | IGR     | SNP   | 0.538 | 12 | 14 |
| --                | chr11 | 102498076 | T   | G      | --                    | --              | IGR     | SNP   | 0.750 | 5  | 15 |
| --                | chr11 | 102729954 | C   | T      | --                    | --              | IGR     | SNP   | 0.889 | 2  | 16 |
| --                | chr11 | 102865688 | T   | G      | --                    | --              | IGR     | SNP   | 0.351 | 24 | 13 |
| --                | chr11 | 102865689 | G   | T      | --                    | --              | IGR     | SNP   | 0.359 | 25 | 14 |
| --                | chr11 | 102896404 | -   | GTA    | --                    | --              | IGR     | INS   | 0.190 | 17 | 4  |
| <i>DYNC2H1</i>    | chr11 | 103062372 | TTG | -      | --                    | --              | Intron  | DEL   | 0.120 | 22 | 3  |
| <i>DYNC2H1</i>    | chr11 | 103153160 | A   | T      | --                    | --              | Intron  | SNP   | 0.400 | 12 | 8  |
| <i>DYNC2H1</i>    | chr11 | 103203064 | C   | A      | --                    | --              | Intron  | SNP   | 0.222 | 14 | 4  |
| <i>DYNC2H1</i>    | chr11 | 103305051 | C   | G      | --                    | --              | Intron  | SNP   | 0.889 | 2  | 16 |
| --                | chr11 | 103531372 | C   | T      | --                    | --              | IGR     | SNP   | 0.879 | 4  | 29 |
| --                | chr11 | 103631621 | -   | AAGG   | --                    | --              | IGR     | INS   | 0.263 | 14 | 5  |
| --                | chr11 | 103631803 | -   | CTACTT | --                    | --              | IGR     | DEL   | 0.105 | 17 | 2  |
| <i>PDGFD</i>      | chr11 | 103924630 | A   | T      | --                    | --              | Intron  | SNP   | 0.963 | 1  | 26 |
| --                | chr11 | 104438745 | -   | CT     | --                    | --              | IGR     | INS   | 0.105 | 34 | 4  |
| <i>CARD16,CAS</i> | chr11 | 104915983 | C   | T      | --                    | --              | Intron  | SNP   | 0.818 | 4  | 18 |
| --                | chr11 | 105055991 | A   | T      | --                    | --              | IGR     | SNP   | 0.526 | 9  | 10 |
| --                | chr11 | 105377304 | C   | T      | --                    | --              | IGR     | SNP   | 0.815 | 5  | 22 |
| --                | chr11 | 105455802 | C   | T      | --                    | --              | IGR     | SNP   | 1.000 | 0  | 15 |
| <i>GRIA4</i>      | chr11 | 105813689 | G   | T      | --                    | --              | Intron  | SNP   | 0.462 | 14 | 12 |
| --                | chr11 | 106306070 | C   | G      | --                    | --              | IGR     | SNP   | 0.947 | 1  | 18 |
| --                | chr11 | 106330904 | A   | G      | --                    | --              | IGR     | SNP   | 0.750 | 7  | 21 |
| --                | chr11 | 106366416 | GGA | -      | --                    | --              | IGR     | DEL   | 0.133 | 13 | 2  |
| --                | chr11 | 106438886 | G   | T      | --                    | --              | IGR     | SNP   | 0.880 | 3  | 22 |
| --                | chr11 | 106545032 | A   | G      | --                    | --              | IGR     | SNP   | 0.789 | 4  | 15 |
| <i>GUCY1A2</i>    | chr11 | 106587742 | C   | A      | --                    | --              | Intron  | SNP   | 0.483 | 15 | 14 |
| <i>GUCY1A2</i>    | chr11 | 106695514 | A   | T      | --                    | --              | Intron  | SNP   | 0.313 | 11 | 5  |
| <i>GUCY1A2</i>    | chr11 | 106756358 | C   | T      | --                    | --              | Intron  | SNP   | 0.842 | 3  | 16 |
| --                | chr11 | 106981700 | G   | T      | --                    | --              | IGR     | SNP   | 0.370 | 17 | 10 |
| --                | chr11 | 107061009 | C   | A      | --                    | --              | IGR     | SNP   | 0.320 | 17 | 8  |
| --                | chr11 | 107073350 | A   | C      | --                    | --              | IGR     | SNP   | 0.240 | 19 | 6  |
| <i>ATM</i>        | chr11 | 108144058 | C   | T      | --                    | --              | Intron  | SNP   | 0.267 | 11 | 4  |
| <i>C11orf65</i>   | chr11 | 108321877 | -   | CT     | --                    | --              | Intron  | INS   | 0.118 | 15 | 2  |
| --                | chr11 | 109116959 | -   | AG     | --                    | --              | IGR     | INS   | 0.115 | 23 | 3  |
| --                | chr11 | 109144326 | A   | G      | --                    | --              | IGR     | SNP   | 0.842 | 3  | 16 |
| --                | chr11 | 109256502 | G   | T      | --                    | --              | IGR     | SNP   | 0.167 | 20 | 4  |
| --                | chr11 | 110349938 | C   | G      | --                    | --              | IGR     | SNP   | 0.864 | 6  | 38 |
| <i>ARHGAP20</i>   | chr11 | 110511488 | A   | G      | --                    | --              | Intron  | SNP   | 0.154 | 22 | 4  |
| --                | chr11 | 110802578 | T   | A      | --                    | --              | IGR     | SNP   | 0.806 | 6  | 25 |
| <i>POU2AF1</i>    | chr11 | 111236598 | AAG | -      | --                    | --              | Intron  | DEL   | 0.176 | 14 | 3  |
| <i>SIK2</i>       | chr11 | 111475700 | G   | T      | --                    | --              | Intron  | SNP   | 0.235 | 13 | 4  |
| <i>ALG9</i>       | chr11 | 111732953 | C   | T      | --                    | --              | Intron  | SNP   | 0.148 | 23 | 4  |
| <i>DIXDC1</i>     | chr11 | 111836951 | C   | T      | --                    | --              | Intron  | SNP   | 0.273 | 8  | 3  |
| <i>DIXDC1</i>     | chr11 | 111853097 | G   | A      | G803A,G170AR268Q,R57Q | Missense_mutati | SNP     | 0.630 | 10    | 17 |    |
| <i>DLAT</i>       | chr11 | 111925986 | G   | T      | --                    | --              | Intron  | SNP   | 0.200 | 12 | 3  |
| --                | chr11 | 112008100 | CTT | -      | --                    | --              | IGR     | DEL   | 0.133 | 13 | 2  |
| <i>BCO2</i>       | chr11 | 112062781 | A   | T      | --                    | --              | Intron  | SNP   | 0.381 | 13 | 8  |
| <i>NCAM1</i>      | chr11 | 112870806 | C   | T      | --                    | --              | Intron  | SNP   | 0.906 | 3  | 29 |
| <i>NCAM1</i>      | chr11 | 113127328 | A   | C      | --                    | --              | Intron  | SNP   | 0.432 | 25 | 19 |
| <i>DRD2</i>       | chr11 | 113304778 | C   | A      | --                    | --              | Intron  | SNP   | 0.281 | 23 | 9  |
| --                | chr11 | 113877258 | G   | C      | --                    | --              | IGR     | SNP   | 0.233 | 23 | 7  |
| <i>ZBTB16</i>     | chr11 | 114106439 | CT  | -      | --                    | --              | Intron  | DEL   | 0.154 | 22 | 4  |
| --                | chr11 | 114376853 | G   | A      | --                    | --              | IGR     | SNP   | 0.200 | 16 | 4  |
| --                | chr11 | 114595316 | C   | A      | --                    | --              | IGR     | SNP   | 0.212 | 26 | 7  |
| --                | chr11 | 115463026 | C   | T      | --                    | --              | IGR     | SNP   | 0.931 | 2  | 27 |
| --                | chr11 | 115575243 | T   | A      | --                    | --              | IGR     | SNP   | 0.143 | 30 | 5  |
| --                | chr11 | 116453359 | C   | G      | --                    | --              | IGR     | SNP   | 0.182 | 18 | 4  |
| <i>APOA1</i>      | chr11 | 116708555 | C   | T      | --                    | --              | 5'Flank | SNP   | 0.400 | 12 | 8  |
| <i>SIK3</i>       | chr11 | 116748948 | C   | G      | --                    | --              | Intron  | SNP   | 0.300 | 21 | 9  |
| <i>SIK3</i>       | chr11 | 116881719 | C   | T      | --                    | --              | Intron  | SNP   | 0.389 | 11 | 7  |
| <i>RNF214</i>     | chr11 | 117118593 | C   | A      | --                    | --              | Intron  | SNP   | 0.174 | 19 | 4  |
| <i>AMICA1</i>     | chr11 | 118093831 | G   | A      | --                    | --              | Intron  | SNP   | 0.231 | 10 | 3  |
| <i>ARCN1</i>      | chr11 | 118452551 | GAC | -      | --                    | --              | Intron  | DEL   | 0.103 | 35 | 4  |
| --                | chr11 | 118595723 | G   | A      | --                    | --              | IGR     | SNP   | 0.115 | 23 | 3  |
| --                | chr11 | 118597392 | T   | C      | --                    | --              | IGR     | SNP   | 0.188 | 13 | 3  |
| --                | chr11 | 118990180 | A   | T      | --                    | --              | IGR     | SNP   | 0.267 | 11 | 4  |
| <i>NLRX1</i>      | chr11 | 119038494 | G   | T      | --                    | --              | 5'Flank | SNP   | 0.286 | 25 | 10 |
| <i>PDZD3</i>      | chr11 | 119057868 | G   | A      | --                    | --              | Intron  | SNP   | 0.429 | 8  | 6  |
| --                | chr11 | 119372063 | C   | A      | --                    | --              | IGR     | SNP   | 0.364 | 7  | 4  |
| --                | chr11 | 119956267 | C   | T      | --                    | --              | IGR     | SNP   | 0.158 | 64 | 12 |
| --                | chr11 | 120028422 | C   | T      | --                    | --              | IGR     | SNP   | 0.821 | 5  | 23 |
| <i>ARHGEF12</i>   | chr11 | 120301556 | A   | T      | --                    | --              | Intron  | SNP   | 0.286 | 25 | 10 |
| <i>ARHGEF12</i>   | chr11 | 120334257 | C   | A      | --                    | --              | Intron  | SNP   | 0.231 | 20 | 6  |
| <i>GRIK4</i>      | chr11 | 120832208 | G   | T      | --                    | --              | Intron  | SNP   | 0.600 | 8  | 12 |

|           |       |           |    |   |       |       |         |     |       |    |    |
|-----------|-------|-----------|----|---|-------|-------|---------|-----|-------|----|----|
| GRIK4     | chr11 | 120833532 | AG | - | --    | --    | Intron  | DEL | 0.103 | 26 | 3  |
| TECTA     | chr11 | 121027284 | C  | A | --    | --    | Intron  | SNP | 0.952 | 1  | 20 |
| --        | chr11 | 121235167 | T  | C | --    | --    | IGR     | SNP | 0.172 | 24 | 5  |
| SORL1     | chr11 | 121418126 | C  | A | --    | --    | Intron  | SNP | 0.267 | 11 | 4  |
| --        | chr11 | 121613409 | C  | A | --    | --    | IGR     | SNP | 0.158 | 16 | 3  |
| --        | chr11 | 121758858 | C  | T | --    | --    | IGR     | SNP | 0.450 | 11 | 9  |
| --        | chr11 | 122333912 | G  | A | --    | --    | IGR     | SNP | 0.885 | 3  | 23 |
| --        | chr11 | 122455800 | G  | C | --    | --    | IGR     | SNP | 0.406 | 19 | 13 |
| CLMP      | chr11 | 122955287 | G  | C | C321G | G107G | Silent  | SNP | 0.829 | 7  | 34 |
| --        | chr11 | 123092462 | G  | A | --    | --    | IGR     | SNP | 0.400 | 18 | 12 |
| --        | chr11 | 123218391 | C  | A | --    | --    | IGR     | SNP | 0.833 | 4  | 20 |
| --        | chr11 | 123292527 | A  | G | --    | --    | IGR     | SNP | 0.818 | 6  | 27 |
| --        | chr11 | 123313840 | C  | G | --    | --    | IGR     | SNP | 0.926 | 2  | 25 |
| GRAMD1B   | chr11 | 123409477 | A  | C | --    | --    | Intron  | SNP | 0.400 | 12 | 8  |
| --        | chr11 | 123541678 | A  | T | --    | --    | IGR     | SNP | 0.250 | 24 | 8  |
| --        | chr11 | 123940854 | A  | G | --    | --    | IGR     | SNP | 0.282 | 28 | 11 |
| --        | chr11 | 124139194 | C  | G | --    | --    | IGR     | SNP | 0.368 | 12 | 7  |
| --        | chr11 | 124139195 | T  | C | --    | --    | IGR     | SNP | 0.381 | 13 | 8  |
| --        | chr11 | 124715637 | C  | G | --    | --    | IGR     | SNP | 0.865 | 5  | 32 |
| PKNOX2    | chr11 | 125048549 | G  | A | --    | --    | Intron  | SNP | 0.455 | 6  | 5  |
| FEZ1      | chr11 | 125342281 | G  | A | --    | --    | Intron  | SNP | 0.389 | 11 | 7  |
| --        | chr11 | 125410137 | C  | A | --    | --    | IGR     | SNP | 0.400 | 3  | 2  |
| FAM118B   | chr11 | 126105204 | A  | T | --    | --    | Intron  | SNP | 0.333 | 18 | 9  |
| DCPS      | chr11 | 126207991 | C  | T | --    | --    | Intron  | SNP | 0.927 | 3  | 38 |
| KIRREL3   | chr11 | 126432773 | C  | T | G90A  | V30V  | Silent  | SNP | 0.906 | 3  | 29 |
| KIRREL3   | chr11 | 126622460 | A  | C | --    | --    | Intron  | SNP | 0.515 | 16 | 17 |
| --        | chr11 | 126969796 | C  | G | --    | --    | IGR     | SNP | 0.143 | 30 | 5  |
| --        | chr11 | 127005200 | G  | A | --    | --    | IGR     | SNP | 0.346 | 17 | 9  |
| --        | chr11 | 127009170 | A  | G | --    | --    | IGR     | SNP | 0.118 | 30 | 4  |
| --        | chr11 | 127152853 | A  | T | --    | --    | IGR     | SNP | 0.185 | 22 | 5  |
| --        | chr11 | 127209822 | C  | G | --    | --    | IGR     | SNP | 0.870 | 3  | 20 |
| --        | chr11 | 127524319 | C  | T | --    | --    | IGR     | SNP | 0.750 | 6  | 18 |
| --        | chr11 | 127651593 | A  | G | --    | --    | IGR     | SNP | 0.273 | 16 | 6  |
| --        | chr11 | 127654558 | C  | A | --    | --    | IGR     | SNP | 0.125 | 28 | 4  |
| --        | chr11 | 127942034 | G  | T | --    | --    | IGR     | SNP | 0.476 | 11 | 10 |
| --        | chr11 | 127963603 | G  | A | --    | --    | IGR     | SNP | 0.448 | 16 | 13 |
| --        | chr11 | 128275536 | C  | A | --    | --    | IGR     | SNP | 0.240 | 19 | 6  |
| --        | chr11 | 129132799 | C  | T | --    | --    | IGR     | SNP | 0.833 | 6  | 30 |
| --        | chr11 | 129138591 | G  | A | --    | --    | IGR     | SNP | 0.143 | 18 | 3  |
| --        | chr11 | 129176674 | GC | - | --    | --    | IGR     | DEL | 0.118 | 15 | 2  |
| --        | chr11 | 129328417 | C  | T | --    | --    | IGR     | SNP | 0.833 | 7  | 35 |
| ADAMTS8   | chr11 | 130297035 | C  | G | --    | --    | Intron  | SNP | 0.905 | 4  | 38 |
| --        | chr11 | 130390871 | C  | A | --    | --    | IGR     | SNP | 0.364 | 7  | 4  |
| --        | chr11 | 130445562 | G  | A | --    | --    | IGR     | SNP | 0.333 | 20 | 10 |
| --        | chr11 | 130598556 | G  | A | --    | --    | IGR     | SNP | 0.237 | 29 | 9  |
| --        | chr11 | 131024490 | C  | T | --    | --    | IGR     | SNP | 0.914 | 3  | 32 |
| --        | chr11 | 131064318 | C  | A | --    | --    | IGR     | SNP | 0.313 | 11 | 5  |
| NTM       | chr11 | 131351088 | G  | A | --    | --    | Intron  | SNP | 0.146 | 35 | 6  |
| NTM       | chr11 | 131403979 | C  | A | --    | --    | Intron  | SNP | 0.100 | 36 | 4  |
| NTM       | chr11 | 131507400 | T  | A | --    | --    | Intron  | SNP | 0.394 | 20 | 13 |
| NTM       | chr11 | 131539096 | G  | C | --    | --    | Intron  | SNP | 0.158 | 16 | 3  |
| NTM       | chr11 | 132078936 | G  | A | --    | --    | Intron  | SNP | 0.533 | 14 | 16 |
| NTM       | chr11 | 132140164 | T  | A | --    | --    | Intron  | SNP | 0.375 | 15 | 9  |
| NTM       | chr11 | 132140165 | G  | C | --    | --    | Intron  | SNP | 0.375 | 15 | 9  |
| --        | chr11 | 132258736 | C  | A | --    | --    | IGR     | SNP | 0.250 | 12 | 4  |
| --        | chr11 | 132258747 | T  | C | --    | --    | IGR     | SNP | 0.286 | 10 | 4  |
| --        | chr11 | 132258748 | G  | A | --    | --    | IGR     | SNP | 0.286 | 10 | 4  |
| --        | chr11 | 132258962 | C  | T | --    | --    | IGR     | SNP | 0.400 | 6  | 4  |
| --        | chr11 | 132258976 | T  | G | --    | --    | IGR     | SNP | 0.444 | 5  | 4  |
| OPCML     | chr11 | 132724562 | C  | T | --    | --    | Intron  | SNP | 0.917 | 3  | 33 |
| OPCML     | chr11 | 132969789 | T  | C | --    | --    | Intron  | SNP | 0.563 | 14 | 18 |
| OPCML     | chr11 | 133139974 | G  | T | --    | --    | Intron  | SNP | 0.227 | 17 | 5  |
| OPCML     | chr11 | 133191657 | C  | G | --    | --    | Intron  | SNP | 0.320 | 17 | 8  |
| OPCML     | chr11 | 133346432 | G  | T | --    | --    | Intron  | SNP | 0.933 | 2  | 28 |
| --        | chr11 | 133409271 | G  | A | --    | --    | IGR     | SNP | 0.846 | 2  | 11 |
| --        | chr11 | 133609103 | G  | A | --    | --    | IGR     | SNP | 0.667 | 3  | 6  |
| --        | chr11 | 133630873 | C  | A | --    | --    | IGR     | SNP | 0.522 | 11 | 12 |
| JAM3      | chr11 | 133958007 | A  | C | --    | --    | Intron  | SNP | 0.370 | 17 | 10 |
| JAM3      | chr11 | 133963822 | G  | A | --    | --    | Intron  | SNP | 0.200 | 12 | 3  |
| JAM3      | chr11 | 133964313 | G  | C | --    | --    | Intron  | SNP | 0.778 | 2  | 7  |
| GLB1L3    | chr11 | 134150602 | G  | A | --    | --    | Intron  | SNP | 0.882 | 4  | 30 |
| GLB1L3    | chr11 | 134189612 | C  | G | --    | --    | 3'Flank | SNP | 0.214 | 11 | 3  |
| B3GAT1    | chr11 | 134278167 | T  | C | --    | --    | Intron  | SNP | 0.122 | 43 | 6  |
| B3GAT1    | chr11 | 134278172 | G  | A | --    | --    | Intron  | SNP | 0.125 | 42 | 6  |
| LOC283177 | chr11 | 134310555 | C  | T | --    | --    | RNA     | SNP | 0.375 | 5  | 3  |
| --        | chr11 | 134686118 | A  | T | --    | --    | IGR     | SNP | 0.519 | 13 | 14 |
| --        | chr11 | 134709631 | C  | T | --    | --    | IGR     | SNP | 0.375 | 10 | 6  |
| --        | chr11 | 134797978 | C  | T | --    | --    | IGR     | SNP | 0.389 | 11 | 7  |
| --        | chr11 | 134831664 | G  | A | --    | --    | IGR     | SNP | 0.179 | 32 | 7  |
| --        | chr11 | 134831666 | T  | A | --    | --    | IGR     | SNP | 0.162 | 31 | 6  |

|             |       |           |     |     |    |    |         |     |       |    |    |
|-------------|-------|-----------|-----|-----|----|----|---------|-----|-------|----|----|
| --          | chr11 | 134845214 | G   | C   | -- | -- | IGR     | SNP | 0.500 | 8  | 8  |
| --          | chr11 | 134910313 | G   | A   | -- | -- | IGR     | SNP | 0.174 | 19 | 4  |
| --          | chr11 | 134911556 | A   | G   | -- | -- | IGR     | SNP | 0.556 | 4  | 5  |
| --          | chr12 | 74230     | G   | T   | -- | -- | IGR     | SNP | 0.142 | 97 | 16 |
| --          | chr12 | 151129    | C   | T   | -- | -- | IGR     | SNP | 0.167 | 35 | 7  |
| SLC6A12     | chr12 | 306320    | C   | T   | -- | -- | Intron  | SNP | 0.194 | 25 | 6  |
| KDM5A       | chr12 | 402968    | A   | T   | -- | -- | Intron  | SNP | 0.455 | 6  | 5  |
| CCDC77      | chr12 | 505789    | A   | C   | -- | -- | Intron  | SNP | 0.486 | 19 | 18 |
| CCDC77      | chr12 | 529586    | TA  | -   | -- | -- | Intron  | DEL | 0.133 | 13 | 2  |
| ERC1        | chr12 | 1113982   | G   | T   | -- | -- | Intron  | SNP | 0.278 | 13 | 5  |
| ERC1        | chr12 | 1113984   | G   | C   | -- | -- | Intron  | SNP | 0.313 | 11 | 5  |
| ERC1        | chr12 | 1237401   | C   | T   | -- | -- | Intron  | SNP | 0.333 | 14 | 7  |
| ERC1        | chr12 | 1320313   | GAT | -   | -- | -- | Intron  | DEL | 0.118 | 15 | 2  |
| CACNA2D4    | chr12 | 1987031   | A   | C   | -- | -- | Intron  | SNP | 0.222 | 21 | 6  |
| DCP1B       | chr12 | 2093323   | T   | G   | -- | -- | Intron  | SNP | 0.541 | 17 | 20 |
| CACNA1C     | chr12 | 2303098   | G   | A   | -- | -- | Intron  | SNP | 0.175 | 47 | 10 |
| CACNA1C     | chr12 | 2475465   | A   | G   | -- | -- | Intron  | SNP | 0.321 | 19 | 9  |
| CACNA1C     | chr12 | 2541947   | C   | T   | -- | -- | Intron  | SNP | 0.235 | 62 | 19 |
| CACNA1C     | chr12 | 2541948   | T   | C   | -- | -- | Intron  | SNP | 0.241 | 60 | 19 |
| CACNA1C     | chr12 | 2548821   | T   | A   | -- | -- | Intron  | SNP | 0.274 | 45 | 17 |
| CACNA1C     | chr12 | 2629559   | T   | A   | -- | -- | Intron  | SNP | 0.163 | 36 | 7  |
| CACNA1C     | chr12 | 2648842   | T   | C   | -- | -- | Intron  | SNP | 0.123 | 57 | 8  |
| CACNA1C     | chr12 | 2648851   | G   | A   | -- | -- | Intron  | SNP | 0.123 | 57 | 8  |
| CACNA1C     | chr12 | 2652190   | C   | G   | -- | -- | Intron  | SNP | 0.140 | 37 | 6  |
| LOC10050742 | chr12 | 2948466   | C   | A   | -- | -- | RNA     | SNP | 0.333 | 22 | 11 |
| TULP3       | chr12 | 3003608   | G   | A   | -- | -- | Intron  | SNP | 0.111 | 24 | 3  |
| TEAD4       | chr12 | 3081683   | G   | T   | -- | -- | Intron  | SNP | 0.333 | 8  | 4  |
| TSPAN9      | chr12 | 3218991   | G   | A   | -- | -- | Intron  | SNP | 0.158 | 16 | 3  |
| TSPAN9      | chr12 | 3307747   | C   | T   | -- | -- | Intron  | SNP | 0.189 | 43 | 10 |
| TSPAN9      | chr12 | 3349489   | A   | T   | -- | -- | Intron  | SNP | 0.659 | 15 | 29 |
| --          | chr12 | 3559866   | A   | G   | -- | -- | IGR     | SNP | 0.226 | 41 | 12 |
| --          | chr12 | 3560838   | G   | A   | -- | -- | IGR     | SNP | 0.320 | 34 | 16 |
| --          | chr12 | 3576405   | C   | A   | -- | -- | IGR     | SNP | 0.235 | 13 | 4  |
| --          | chr12 | 4115578   | AAT | -   | -- | -- | IGR     | DEL | 0.133 | 13 | 2  |
| --          | chr12 | 4134182   | C   | T   | -- | -- | IGR     | SNP | 0.316 | 26 | 12 |
| --          | chr12 | 4259055   | C   | A   | -- | -- | IGR     | SNP | 0.133 | 26 | 4  |
| --          | chr12 | 4358640   | C   | T   | -- | -- | IGR     | SNP | 0.233 | 23 | 7  |
| CCND2       | chr12 | 4402685   | T   | C   | -- | -- | Intron  | SNP | 0.259 | 43 | 15 |
| FGF23       | chr12 | 4477893   | A   | T   | -- | -- | 3'UTR   | SNP | 0.295 | 31 | 13 |
| --          | chr12 | 4513874   | A   | T   | -- | -- | IGR     | SNP | 0.625 | 12 | 20 |
| C12orf4     | chr12 | 4623522   | GA  | -   | -- | -- | Intron  | DEL | 0.105 | 17 | 2  |
| KCNA6       | chr12 | 4925464   | C   | G   | -- | -- | Intron  | SNP | 0.138 | 25 | 4  |
| ANO2        | chr12 | 5894831   | -   | ACG | -- | -- | Intron  | INS | 0.162 | 57 | 11 |
| ANO2        | chr12 | 5963633   | G   | T   | -- | -- | Intron  | SNP | 0.313 | 22 | 10 |
| VWF         | chr12 | 6118361   | G   | A   | -- | -- | Intron  | SNP | 0.125 | 28 | 4  |
| --          | chr12 | 6281073   | C   | T   | -- | -- | IGR     | SNP | 0.314 | 48 | 22 |
| --          | chr12 | 6404333   | A   | C   | -- | -- | IGR     | SNP | 0.154 | 22 | 4  |
| IFFO1       | chr12 | 6650890   | G   | A   | -- | -- | Intron  | SNP | 0.260 | 54 | 19 |
| IFFO1       | chr12 | 6656846   | C   | A   | -- | -- | Intron  | SNP | 0.308 | 36 | 16 |
| LPAR5       | chr12 | 6739792   | T   | A   | -- | -- | Intron  | SNP | 0.370 | 17 | 10 |
| LPAR5       | chr12 | 6739800   | G   | T   | -- | -- | Intron  | SNP | 0.385 | 16 | 10 |
| LPCAT3      | chr12 | 7096749   | C   | G   | -- | -- | Intron  | SNP | 0.326 | 31 | 15 |
| CLSTN3      | chr12 | 7290351   | A   | T   | -- | -- | Intron  | SNP | 0.143 | 36 | 6  |
| CLSTN3      | chr12 | 7290352   | A   | G   | -- | -- | Intron  | SNP | 0.171 | 34 | 7  |
| --          | chr12 | 7484002   | -   | ATG | -- | -- | IGR     | INS | 0.114 | 31 | 4  |
| --          | chr12 | 7487149   | C   | T   | -- | -- | IGR     | SNP | 0.250 | 12 | 4  |
| --          | chr12 | 7487350   | GC  | -   | -- | -- | IGR     | DEL | 0.357 | 9  | 5  |
| --          | chr12 | 7670292   | GAA | -   | -- | -- | IGR     | DEL | 0.118 | 15 | 2  |
| --          | chr12 | 7749487   | C   | T   | -- | -- | IGR     | SNP | 0.206 | 27 | 7  |
| --          | chr12 | 7784584   | C   | T   | -- | -- | IGR     | SNP | 0.512 | 21 | 22 |
| --          | chr12 | 7850652   | G   | A   | -- | -- | IGR     | SNP | 0.294 | 36 | 15 |
| SLC2A14     | chr12 | 7979856   | T   | A   | -- | -- | Intron  | SNP | 0.185 | 22 | 5  |
| SLC2A14     | chr12 | 7986223   | CA  | -   | -- | -- | Intron  | DEL | 0.314 | 24 | 11 |
| SLC2A14     | chr12 | 8025945   | G   | T   | -- | -- | 5'Flank | SNP | 0.179 | 23 | 5  |
| --          | chr12 | 8068828   | G   | A   | -- | -- | IGR     | SNP | 0.342 | 25 | 13 |
| --          | chr12 | 8254302   | G   | A   | -- | -- | IGR     | SNP | 0.200 | 12 | 3  |
| FAM86FP     | chr12 | 8387010   | A   | T   | -- | -- | RNA     | SNP | 0.119 | 59 | 8  |
| --          | chr12 | 8429280   | G   | T   | -- | -- | IGR     | SNP | 0.179 | 46 | 10 |
| --          | chr12 | 8442851   | T   | C   | -- | -- | IGR     | SNP | 0.143 | 30 | 5  |
| --          | chr12 | 8442885   | A   | G   | -- | -- | IGR     | SNP | 0.100 | 45 | 5  |
| --          | chr12 | 8465479   | C   | T   | -- | -- | IGR     | SNP | 0.123 | 50 | 7  |
| --          | chr12 | 8474412   | G   | C   | -- | -- | IGR     | SNP | 0.122 | 43 | 6  |
| --          | chr12 | 8478760   | A   | G   | -- | -- | IGR     | SNP | 0.167 | 20 | 4  |
| --          | chr12 | 8478781   | TC  | -   | -- | -- | IGR     | DEL | 0.150 | 17 | 3  |
| LOC389634   | chr12 | 8523927   | A   | C   | -- | -- | RNA     | SNP | 0.222 | 28 | 8  |
| LOC389634   | chr12 | 8524123   | C   | T   | -- | -- | RNA     | SNP | 0.143 | 30 | 5  |
| LOC389634   | chr12 | 8543877   | -   | CAG | -- | -- | 5'Flank | INS | 0.105 | 17 | 2  |
| MFAP5       | chr12 | 8813680   | A   | G   | -- | -- | Intron  | SNP | 0.214 | 33 | 9  |
| --          | chr12 | 8826834   | T   | C   | -- | -- | IGR     | SNP | 0.160 | 21 | 4  |
| RIMKLB      | chr12 | 8927167   | G   | T   | -- | -- | 3'UTR   | SNP | 0.250 | 21 | 7  |



|           |       |          |      |     |       |       |         |     |       |    |    |
|-----------|-------|----------|------|-----|-------|-------|---------|-----|-------|----|----|
| --        | chr12 | 8961063  | C    | T   | --    | --    | IGR     | SNP | 0.113 | 47 | 6  |
| --        | chr12 | 8963413  | G    | T   | --    | --    | IGR     | SNP | 0.190 | 17 | 4  |
| --        | chr12 | 9175969  | G    | A   | --    | --    | IGR     | SNP | 0.179 | 46 | 10 |
| --        | chr12 | 9204560  | C    | T   | --    | --    | IGR     | SNP | 0.380 | 31 | 19 |
| A2M       | chr12 | 9264227  | C    | A   | --    | --    | Intron  | SNP | 0.100 | 36 | 4  |
| --        | chr12 | 9280313  | C    | T   | --    | --    | IGR     | SNP | 0.702 | 17 | 40 |
| --        | chr12 | 9373994  | A    | G   | --    | --    | IGR     | SNP | 1.000 | 0  | 2  |
| CLEC9A    | chr12 | 10185020 | C    | G   | --    | --    | Intron  | SNP | 0.269 | 19 | 7  |
| STYK1     | chr12 | 10771366 | G    | A   | --    | --    | 3'Flank | SNP | 0.667 | 22 | 44 |
| STYK1     | chr12 | 10785026 | T    | C   | --    | --    | Intron  | SNP | 0.391 | 14 | 9  |
| --        | chr12 | 11376643 | A    | G   | --    | --    | IGR     | SNP | 0.406 | 19 | 13 |
| --        | chr12 | 11436175 | G    | C   | --    | --    | IGR     | SNP | 0.308 | 27 | 12 |
| PRB1      | chr12 | 11506566 | C    | T   | G471A | K157K | Silent  | SNP | 0.121 | 29 | 4  |
| LOC338817 | chr12 | 11708677 | G    | C   | --    | --    | RNA     | SNP | 0.301 | 51 | 22 |
| LOC338817 | chr12 | 11708678 | G    | T   | --    | --    | RNA     | SNP | 0.297 | 52 | 22 |
| ETV6      | chr12 | 11965525 | A    | G   | --    | --    | Intron  | SNP | 0.649 | 13 | 24 |
| ETV6      | chr12 | 12001866 | G    | A   | --    | --    | Intron  | SNP | 0.319 | 32 | 15 |
| LOH12CR1  | chr12 | 12563577 | GT   | -   | --    | --    | Intron  | DEL | 0.188 | 13 | 3  |
| LOH12CR1  | chr12 | 12563593 | A    | G   | --    | --    | Intron  | SNP | 0.136 | 19 | 3  |
| --        | chr12 | 12805774 | C    | T   | --    | --    | IGR     | SNP | 0.440 | 14 | 11 |
| GPRC5A    | chr12 | 13052081 | C    | T   | --    | --    | Intron  | SNP | 0.316 | 26 | 12 |
| --        | chr12 | 13335597 | T    | A   | --    | --    | IGR     | SNP | 0.288 | 42 | 17 |
| --        | chr12 | 13454666 | G    | T   | --    | --    | IGR     | SNP | 0.410 | 23 | 16 |
| --        | chr12 | 13631980 | C    | G   | --    | --    | IGR     | SNP | 0.295 | 31 | 13 |
| GRIN2B    | chr12 | 13816698 | T    | C   | --    | --    | Intron  | SNP | 0.410 | 23 | 16 |
| --        | chr12 | 14251877 | A    | T   | --    | --    | IGR     | SNP | 0.200 | 12 | 3  |
| --        | chr12 | 14487494 | C    | T   | --    | --    | IGR     | SNP | 0.596 | 21 | 31 |
| ATF7IP    | chr12 | 14527228 | G    | T   | --    | --    | Intron  | SNP | 0.231 | 10 | 3  |
| ATF7IP    | chr12 | 14597944 | G    | T   | --    | --    | Intron  | SNP | 0.300 | 7  | 3  |
| --        | chr12 | 15189973 | C    | G   | --    | --    | IGR     | SNP | 0.622 | 17 | 28 |
| --        | chr12 | 15200420 | C    | T   | --    | --    | IGR     | SNP | 0.432 | 25 | 19 |
| REGG      | chr12 | 15305464 | G    | C   | --    | --    | Intron  | SNP | 0.316 | 39 | 18 |
| PTPRO     | chr12 | 15518343 | T    | C   | --    | --    | Intron  | SNP | 0.424 | 19 | 14 |
| PTPRO     | chr12 | 15725089 | G    | C   | --    | --    | Intron  | SNP | 0.294 | 24 | 10 |
| PTPRO     | chr12 | 15725188 | G    | C   | --    | --    | Intron  | SNP | 0.243 | 28 | 9  |
| --        | chr12 | 15767347 | C    | T   | --    | --    | IGR     | SNP | 0.703 | 11 | 26 |
| DERA      | chr12 | 16067347 | G    | A   | --    | --    | Intron  | SNP | 0.267 | 11 | 4  |
| --        | chr12 | 16306774 | G    | C   | --    | --    | IGR     | SNP | 0.444 | 20 | 16 |
| --        | chr12 | 16306947 | G    | C   | --    | --    | IGR     | SNP | 0.280 | 18 | 7  |
| --        | chr12 | 16307188 | G    | C   | --    | --    | IGR     | SNP | 0.360 | 16 | 9  |
| --        | chr12 | 16477499 | G    | T   | --    | --    | IGR     | SNP | 0.278 | 26 | 10 |
| --        | chr12 | 17153640 | A    | G   | --    | --    | IGR     | SNP | 0.231 | 10 | 3  |
| --        | chr12 | 17153679 | A    | G   | --    | --    | IGR     | SNP | 0.250 | 9  | 3  |
| --        | chr12 | 17175531 | G    | A   | --    | --    | IGR     | SNP | 0.179 | 23 | 5  |
| --        | chr12 | 17175539 | A    | G   | --    | --    | IGR     | SNP | 0.172 | 24 | 5  |
| --        | chr12 | 17390725 | C    | G   | --    | --    | IGR     | SNP | 0.103 | 35 | 4  |
| --        | chr12 | 17390728 | T    | C   | --    | --    | IGR     | SNP | 0.103 | 35 | 4  |
| --        | chr12 | 17420172 | G    | A   | --    | --    | IGR     | SNP | 0.290 | 22 | 9  |
| --        | chr12 | 17450130 | C    | A   | --    | --    | IGR     | SNP | 0.333 | 26 | 13 |
| --        | chr12 | 17477951 | A    | T   | --    | --    | IGR     | SNP | 0.310 | 29 | 13 |
| --        | chr12 | 17481915 | AAC  | -   | --    | --    | IGR     | DEL | 0.108 | 33 | 4  |
| --        | chr12 | 17939294 | T    | A   | --    | --    | IGR     | SNP | 0.524 | 10 | 11 |
| --        | chr12 | 18016251 | G    | A   | --    | --    | IGR     | SNP | 0.373 | 32 | 19 |
| --        | chr12 | 18260224 | T    | G   | --    | --    | IGR     | SNP | 0.256 | 29 | 10 |
| --        | chr12 | 18312124 | C    | A   | --    | --    | IGR     | SNP | 0.129 | 27 | 4  |
| --        | chr12 | 18405620 | C    | G   | --    | --    | IGR     | SNP | 0.700 | 9  | 21 |
| PIK3C2G   | chr12 | 18482558 | G    | A   | --    | --    | Intron  | SNP | 0.239 | 35 | 11 |
| PIK3C2G   | chr12 | 18493558 | A    | G   | --    | --    | Intron  | SNP | 0.340 | 31 | 16 |
| PIK3C2G   | chr12 | 18558897 | A    | G   | --    | --    | Intron  | SNP | 0.367 | 19 | 11 |
| PIK3C2G   | chr12 | 18678598 | C    | A   | --    | --    | Intron  | SNP | 0.256 | 29 | 10 |
| PIK3C2G   | chr12 | 18704025 | G    | T   | --    | --    | Intron  | SNP | 0.226 | 48 | 14 |
| PLCZ1     | chr12 | 18884698 | G    | A   | --    | --    | Intron  | SNP | 0.364 | 21 | 12 |
| --        | chr12 | 19055624 | C    | A   | --    | --    | IGR     | SNP | 0.340 | 35 | 18 |
| --        | chr12 | 19055625 | T    | A   | --    | --    | IGR     | SNP | 0.340 | 35 | 18 |
| --        | chr12 | 19229674 | T    | G   | --    | --    | IGR     | SNP | 0.179 | 32 | 7  |
| --        | chr12 | 19707332 | T    | A   | --    | --    | IGR     | SNP | 0.500 | 4  | 4  |
| --        | chr12 | 19788641 | C    | A   | --    | --    | IGR     | SNP | 0.244 | 31 | 10 |
| --        | chr12 | 19795674 | -    | AAT | --    | --    | IGR     | INS | 0.115 | 23 | 3  |
| --        | chr12 | 19919722 | TATA | -   | --    | --    | IGR     | DEL | 0.138 | 25 | 4  |
| --        | chr12 | 19919726 | AT   | -   | --    | --    | IGR     | DEL | 0.125 | 21 | 3  |
| --        | chr12 | 20112790 | T    | G   | --    | --    | IGR     | SNP | 0.275 | 29 | 11 |
| --        | chr12 | 20312098 | G    | A   | --    | --    | IGR     | SNP | 0.188 | 13 | 3  |
| PDE3A     | chr12 | 20536008 | C    | G   | --    | --    | Intron  | SNP | 0.328 | 39 | 19 |
| PDE3A     | chr12 | 20552667 | T    | A   | --    | --    | Intron  | SNP | 0.190 | 34 | 8  |
| PDE3A     | chr12 | 20686508 | C    | T   | --    | --    | Intron  | SNP | 0.317 | 28 | 13 |
| PDE3A     | chr12 | 20815913 | C    | T   | --    | --    | Intron  | SNP | 0.163 | 41 | 8  |
| PDE3A     | chr12 | 20822025 | C    | T   | --    | --    | Intron  | SNP | 0.179 | 23 | 5  |
| --        | chr12 | 20923974 | G    | C   | --    | --    | IGR     | SNP | 0.192 | 21 | 5  |
| SLCO1B3   | chr12 | 20967393 | C    | A   | --    | --    | Intron  | SNP | 0.455 | 18 | 15 |
| SLCO1B3   | chr12 | 21061042 | G    | C   | --    | --    | Intron  | SNP | 0.316 | 26 | 12 |

|           |       |          |      |     |        |       |                 |     |       |    |    |
|-----------|-------|----------|------|-----|--------|-------|-----------------|-----|-------|----|----|
| --        | chr12 | 21138578 | C    | A   | --     | --    | IGR             | SNP | 0.120 | 44 | 6  |
| SLCO1B7   | chr12 | 21212081 | T    | G   | --     | --    | Intron          | SNP | 0.115 | 54 | 7  |
| SLCO1B7   | chr12 | 21242654 | -    | TA  | --     | --    | Intron          | INS | 0.105 | 34 | 4  |
| SLCO1B1   | chr12 | 21367230 | T    | A   | --     | --    | Intron          | SNP | 0.156 | 27 | 5  |
| SLCO1B1   | chr12 | 21367245 | A    | G   | --     | --    | Intron          | SNP | 0.152 | 28 | 5  |
| --        | chr12 | 21558682 | A    | C   | --     | --    | IGR             | SNP | 0.264 | 53 | 19 |
| --        | chr12 | 21869549 | A    | G   | --     | --    | IGR             | SNP | 0.160 | 42 | 8  |
| --        | chr12 | 22287767 | A    | T   | --     | --    | IGR             | SNP | 0.207 | 46 | 12 |
| ST8SIA1   | chr12 | 22376568 | A    | G   | --     | --    | Intron          | SNP | 0.196 | 41 | 10 |
| ST8SIA1   | chr12 | 22408454 | G    | A   | --     | --    | Intron          | SNP | 0.477 | 23 | 21 |
| --        | chr12 | 22542977 | T    | G   | --     | --    | IGR             | SNP | 0.300 | 28 | 12 |
| --        | chr12 | 22921757 | C    | A   | --     | --    | IGR             | SNP | 0.476 | 22 | 20 |
| --        | chr12 | 23095676 | C    | T   | --     | --    | IGR             | SNP | 0.477 | 23 | 21 |
| --        | chr12 | 23146718 | G    | A   | --     | --    | IGR             | SNP | 0.316 | 54 | 25 |
| --        | chr12 | 23147191 | G    | C   | --     | --    | IGR             | SNP | 0.345 | 38 | 20 |
| --        | chr12 | 23288682 | G    | C   | --     | --    | IGR             | SNP | 0.269 | 57 | 21 |
| --        | chr12 | 23439060 | C    | T   | --     | --    | IGR             | SNP | 0.444 | 30 | 24 |
| --        | chr12 | 23458849 | G    | A   | --     | --    | IGR             | SNP | 0.229 | 37 | 11 |
| --        | chr12 | 23463814 | C    | G   | --     | --    | IGR             | SNP | 0.512 | 21 | 22 |
| --        | chr12 | 23564330 | G    | A   | --     | --    | IGR             | SNP | 0.174 | 19 | 4  |
| --        | chr12 | 23572380 | G    | A   | --     | --    | IGR             | SNP | 0.450 | 33 | 27 |
| --        | chr12 | 23673297 | C    | T   | --     | --    | IGR             | SNP | 0.148 | 23 | 4  |
| SOX5      | chr12 | 23689644 | C    | T   | --     | --    | Intron          | SNP | 0.278 | 26 | 10 |
| SOX5      | chr12 | 23689676 | C    | G   | --     | --    | Intron          | SNP | 0.289 | 32 | 13 |
| SOX5      | chr12 | 23727157 | G    | T   | --     | --    | Intron          | SNP | 0.333 | 18 | 9  |
| SOX5      | chr12 | 23883501 | C    | G   | --     | --    | Intron          | SNP | 0.140 | 43 | 7  |
| SOX5      | chr12 | 23999426 | A    | C   | --     | --    | Intron          | SNP | 0.357 | 27 | 15 |
| SOX5      | chr12 | 24105668 | C    | G   | --     | --    | Intron          | SNP | 0.241 | 44 | 14 |
| SOX5      | chr12 | 24107148 | G    | C   | --     | --    | Intron          | SNP | 0.244 | 34 | 11 |
| SOX5      | chr12 | 24360636 | T    | A   | --     | --    | Intron          | SNP | 0.102 | 44 | 5  |
| SOX5      | chr12 | 24488452 | A    | C   | --     | --    | Intron          | SNP | 0.232 | 43 | 13 |
| SOX5      | chr12 | 24622746 | G    | A   | --     | --    | Intron          | SNP | 0.294 | 36 | 15 |
| LINC00477 | chr12 | 24736773 | C    | A   | --     | --    | RNA             | SNP | 0.195 | 33 | 8  |
| --        | chr12 | 24810527 | TTTC | -   | --     | --    | IGR             | DEL | 0.105 | 17 | 2  |
| BCAT1     | chr12 | 25029007 | C    | G   | --     | --    | Intron          | SNP | 0.421 | 22 | 16 |
| BCAT1     | chr12 | 25044865 | TC   | -   | --     | --    | Intron          | DEL | 0.103 | 35 | 4  |
| --        | chr12 | 25181413 | C    | A   | --     | --    | IGR             | SNP | 0.244 | 34 | 11 |
| --        | chr12 | 25182847 | T    | C   | --     | --    | IGR             | SNP | 0.133 | 78 | 12 |
| --        | chr12 | 25957765 | A    | C   | --     | --    | IGR             | SNP | 0.200 | 28 | 7  |
| ITPR2     | chr12 | 26551031 | A    | G   | --     | --    | Intron          | SNP | 0.188 | 26 | 6  |
| ITPR2     | chr12 | 26925549 | A    | T   | --     | --    | Intron          | SNP | 0.100 | 27 | 3  |
| TM7SF3    | chr12 | 27127112 | G    | A   | C1499T | T500M | Missense_mutati | SNP | 0.297 | 45 | 19 |
| --        | chr12 | 27291122 | GT   | -   | --     | --    | IGR             | DEL | 0.105 | 17 | 2  |
| --        | chr12 | 28126730 | C    | T   | --     | --    | IGR             | SNP | 0.667 | 16 | 32 |
| --        | chr12 | 28152949 | T    | A   | --     | --    | IGR             | SNP | 0.316 | 26 | 12 |
| --        | chr12 | 28250192 | C    | A   | --     | --    | IGR             | SNP | 0.673 | 16 | 33 |
| CCDC91    | chr12 | 28524566 | C    | T   | --     | --    | Intron          | SNP | 0.294 | 36 | 15 |
| CCDC91    | chr12 | 28654453 | C    | T   | --     | --    | Intron          | SNP | 0.818 | 2  | 9  |
| CCDC91    | chr12 | 28666801 | G    | C   | --     | --    | Intron          | SNP | 0.632 | 21 | 36 |
| --        | chr12 | 28959628 | G    | C   | --     | --    | IGR             | SNP | 0.605 | 15 | 23 |
| --        | chr12 | 29069505 | T    | A   | --     | --    | IGR             | SNP | 0.125 | 35 | 5  |
| --        | chr12 | 29260903 | G    | A   | --     | --    | IGR             | SNP | 0.233 | 23 | 7  |
| FAR2      | chr12 | 29413961 | G    | A   | --     | --    | Intron          | SNP | 0.182 | 36 | 8  |
| FAR2      | chr12 | 29456518 | C    | G   | --     | --    | Intron          | SNP | 0.692 | 16 | 36 |
| --        | chr12 | 29577824 | T    | G   | --     | --    | IGR             | SNP | 0.404 | 28 | 19 |
| TMTC1     | chr12 | 29682379 | A    | G   | --     | --    | Intron          | SNP | 0.355 | 20 | 11 |
| TMTC1     | chr12 | 29725252 | C    | G   | --     | --    | Intron          | SNP | 0.394 | 20 | 13 |
| TMTC1     | chr12 | 29729358 | T    | C   | --     | --    | Intron          | SNP | 0.339 | 41 | 21 |
| TMTC1     | chr12 | 29780912 | G    | A   | --     | --    | Intron          | SNP | 0.282 | 28 | 11 |
| TMTC1     | chr12 | 29872115 | C    | A   | --     | --    | Intron          | SNP | 0.241 | 22 | 7  |
| --        | chr12 | 30075401 | A    | C   | --     | --    | IGR             | SNP | 0.481 | 14 | 13 |
| --        | chr12 | 30117407 | G    | T   | --     | --    | IGR             | SNP | 0.294 | 36 | 15 |
| --        | chr12 | 30202187 | A    | T   | --     | --    | IGR             | SNP | 0.161 | 47 | 9  |
| --        | chr12 | 30211621 | -    | AC  | --     | --    | IGR             | INS | 0.132 | 33 | 5  |
| --        | chr12 | 30254342 | G    | C   | --     | --    | IGR             | SNP | 0.393 | 17 | 11 |
| --        | chr12 | 30851652 | T    | C   | --     | --    | IGR             | SNP | 0.250 | 27 | 9  |
| --        | chr12 | 30930663 | G    | C   | --     | --    | IGR             | SNP | 0.258 | 23 | 8  |
| --        | chr12 | 31168238 | C    | A   | --     | --    | IGR             | SNP | 0.114 | 31 | 4  |
| --        | chr12 | 31285874 | C    | G   | --     | --    | IGR             | SNP | 0.313 | 22 | 10 |
| --        | chr12 | 31287384 | T    | C   | --     | --    | IGR             | SNP | 0.182 | 27 | 6  |
| --        | chr12 | 31338930 | -    | CAA | --     | --    | IGR             | INS | 0.121 | 29 | 4  |
| --        | chr12 | 31405370 | G    | C   | --     | --    | IGR             | SNP | 0.120 | 22 | 3  |
| --        | chr12 | 31486247 | G    | A   | --     | --    | IGR             | SNP | 0.167 | 20 | 4  |
| DENND5B   | chr12 | 31700937 | G    | A   | --     | --    | Intron          | SNP | 0.129 | 27 | 4  |
| AMN1      | chr12 | 31863522 | T    | A   | --     | --    | Intron          | SNP | 0.238 | 16 | 5  |
| --        | chr12 | 31958589 | T    | C   | --     | --    | IGR             | SNP | 0.167 | 20 | 4  |
| --        | chr12 | 31984154 | G    | A   | --     | --    | IGR             | SNP | 0.304 | 39 | 17 |
| --        | chr12 | 32164882 | G    | T   | --     | --    | IGR             | SNP | 0.235 | 13 | 4  |
| --        | chr12 | 32582120 | G    | T   | --     | --    | IGR             | SNP | 0.119 | 37 | 5  |
| --        | chr12 | 32617909 | A    | G   | --     | --    | IGR             | SNP | 0.100 | 36 | 4  |

|                 |       |          |      |     |    |    |        |     |       |    |    |
|-----------------|-------|----------|------|-----|----|----|--------|-----|-------|----|----|
| --              | chr12 | 32638393 | G    | T   | -- | -- | IGR    | SNP | 0.308 | 9  | 4  |
| --              | chr12 | 32644377 | G    | C   | -- | -- | IGR    | SNP | 0.370 | 34 | 20 |
| <i>FGD4</i>     | chr12 | 32677813 | A    | G   | -- | -- | Intron | SNP | 0.545 | 10 | 12 |
| --              | chr12 | 33066737 | T    | C   | -- | -- | IGR    | SNP | 0.409 | 13 | 9  |
| --              | chr12 | 33253741 | T    | A   | -- | -- | IGR    | SNP | 0.200 | 12 | 3  |
| --              | chr12 | 33298486 | G    | C   | -- | -- | IGR    | SNP | 0.333 | 10 | 5  |
| --              | chr12 | 33298490 | G    | A   | -- | -- | IGR    | SNP | 0.333 | 10 | 5  |
| --              | chr12 | 33351111 | A    | G   | -- | -- | IGR    | SNP | 0.267 | 22 | 8  |
| --              | chr12 | 33415716 | C    | T   | -- | -- | IGR    | SNP | 0.267 | 33 | 12 |
| --              | chr12 | 33642546 | C    | T   | -- | -- | IGR    | SNP | 0.628 | 16 | 27 |
| --              | chr12 | 33741608 | G    | A   | -- | -- | IGR    | SNP | 0.167 | 20 | 4  |
| --              | chr12 | 33743839 | T    | C   | -- | -- | IGR    | SNP | 0.458 | 13 | 11 |
| --              | chr12 | 33760345 | TAC  | -   | -- | -- | IGR    | DEL | 0.107 | 25 | 3  |
| --              | chr12 | 33780043 | C    | T   | -- | -- | IGR    | SNP | 0.306 | 25 | 11 |
| --              | chr12 | 34033415 | G    | A   | -- | -- | IGR    | SNP | 0.516 | 15 | 16 |
| --              | chr12 | 34048060 | G    | A   | -- | -- | IGR    | SNP | 0.190 | 17 | 4  |
| --              | chr12 | 34074434 | G    | T   | -- | -- | IGR    | SNP | 0.222 | 14 | 4  |
| --              | chr12 | 34478769 | C    | A   | -- | -- | IGR    | SNP | 0.455 | 24 | 20 |
| --              | chr12 | 34579047 | -    | TC  | -- | -- | IGR    | INS | 0.108 | 33 | 4  |
| --              | chr12 | 34605166 | T    | A   | -- | -- | IGR    | SNP | 0.357 | 18 | 10 |
| --              | chr12 | 34776233 | TG   | -   | -- | -- | IGR    | DEL | 0.464 | 15 | 13 |
| --              | chr12 | 34808190 | G    | A   | -- | -- | IGR    | SNP | 0.229 | 27 | 8  |
| --              | chr12 | 37856886 | G    | T   | -- | -- | IGR    | SNP | 0.185 | 22 | 5  |
| --              | chr12 | 37857115 | C    | T   | -- | -- | IGR    | SNP | 0.163 | 36 | 7  |
| --              | chr12 | 37857119 | C    | A   | -- | -- | IGR    | SNP | 0.163 | 36 | 7  |
| --              | chr12 | 37857506 | T    | C   | -- | -- | IGR    | SNP | 0.205 | 31 | 8  |
| --              | chr12 | 37859163 | G    | C   | -- | -- | IGR    | SNP | 0.200 | 28 | 7  |
| --              | chr12 | 37859563 | A    | G   | -- | -- | IGR    | SNP | 0.167 | 20 | 4  |
| --              | chr12 | 37863813 | C    | T   | -- | -- | IGR    | SNP | 0.103 | 26 | 3  |
| --              | chr12 | 37866485 | G    | A   | -- | -- | IGR    | SNP | 0.179 | 23 | 5  |
| --              | chr12 | 37867367 | -    | TC  | -- | -- | IGR    | INS | 0.136 | 19 | 3  |
| --              | chr12 | 37867824 | A    | C   | -- | -- | IGR    | SNP | 0.111 | 40 | 5  |
| --              | chr12 | 37894411 | C    | G   | -- | -- | IGR    | SNP | 0.143 | 42 | 7  |
| --              | chr12 | 37895789 | G    | C   | -- | -- | IGR    | SNP | 0.143 | 36 | 6  |
| --              | chr12 | 37899288 | C    | T   | -- | -- | IGR    | SNP | 0.182 | 18 | 4  |
| --              | chr12 | 37921114 | A    | G   | -- | -- | IGR    | SNP | 0.200 | 32 | 8  |
| --              | chr12 | 37964282 | T    | C   | -- | -- | IGR    | SNP | 0.389 | 11 | 7  |
| --              | chr12 | 38102818 | AG   | -   | -- | -- | IGR    | DEL | 0.190 | 17 | 4  |
| --              | chr12 | 38130001 | A    | G   | -- | -- | IGR    | SNP | 0.103 | 26 | 3  |
| --              | chr12 | 38358354 | G    | T   | -- | -- | IGR    | SNP | 0.333 | 22 | 11 |
| --              | chr12 | 38431492 | TC   | -   | -- | -- | IGR    | DEL | 0.548 | 14 | 17 |
| --              | chr12 | 38594676 | C    | T   | -- | -- | IGR    | SNP | 0.118 | 45 | 6  |
| --              | chr12 | 38883902 | A    | C   | -- | -- | IGR    | SNP | 0.556 | 20 | 25 |
| <i>CPNE8</i>    | chr12 | 39055238 | C    | T   | -- | -- | Intron | SNP | 0.158 | 16 | 3  |
| --              | chr12 | 39412963 | A    | C   | -- | -- | IGR    | SNP | 0.188 | 39 | 9  |
| <i>KIF21A</i>   | chr12 | 39728602 | G    | C   | -- | -- | Intron | SNP | 0.308 | 18 | 8  |
| <i>C12orf40</i> | chr12 | 40024973 | C    | G   | -- | -- | Intron | SNP | 0.182 | 18 | 4  |
| --              | chr12 | 40145251 | TTGG | -   | -- | -- | IGR    | DEL | 0.219 | 25 | 7  |
| <i>SLC2A13</i>  | chr12 | 40200141 | A    | T   | -- | -- | Intron | SNP | 0.371 | 22 | 13 |
| <i>SLC2A13</i>  | chr12 | 40289621 | -    | CAT | -- | -- | Intron | INS | 0.111 | 48 | 6  |
| <i>SLC2A13</i>  | chr12 | 40445080 | C    | A   | -- | -- | Intron | SNP | 0.188 | 39 | 9  |
| --              | chr12 | 40562741 | A    | T   | -- | -- | IGR    | SNP | 0.304 | 16 | 7  |
| <i>LRRK2</i>    | chr12 | 40642745 | G    | A   | -- | -- | Intron | SNP | 0.381 | 26 | 16 |
| --              | chr12 | 40790866 | G    | C   | -- | -- | IGR    | SNP | 0.250 | 27 | 9  |
| --              | chr12 | 40853219 | T    | C   | -- | -- | IGR    | SNP | 0.158 | 16 | 3  |
| --              | chr12 | 41073268 | G    | T   | -- | -- | IGR    | SNP | 0.225 | 31 | 9  |
| --              | chr12 | 41074291 | G    | C   | -- | -- | IGR    | SNP | 0.313 | 33 | 15 |
| --              | chr12 | 41074293 | C    | T   | -- | -- | IGR    | SNP | 0.306 | 34 | 15 |
| <i>PDZRN4</i>   | chr12 | 41965180 | A    | T   | -- | -- | Intron | SNP | 0.130 | 20 | 3  |
| --              | chr12 | 41979010 | C    | T   | -- | -- | IGR    | SNP | 0.582 | 23 | 32 |
| --              | chr12 | 42070666 | T    | G   | -- | -- | IGR    | SNP | 0.235 | 13 | 4  |
| --              | chr12 | 42070686 | C    | T   | -- | -- | IGR    | SNP | 0.211 | 15 | 4  |
| --              | chr12 | 42112128 | C    | T   | -- | -- | IGR    | SNP | 0.640 | 9  | 16 |
| --              | chr12 | 42138275 | C    | T   | -- | -- | IGR    | SNP | 0.233 | 23 | 7  |
| --              | chr12 | 42157037 | C    | A   | -- | -- | IGR    | SNP | 0.558 | 23 | 29 |
| --              | chr12 | 42157038 | C    | T   | -- | -- | IGR    | SNP | 0.547 | 24 | 29 |
| --              | chr12 | 42232654 | A    | T   | -- | -- | IGR    | SNP | 0.700 | 9  | 21 |
| --              | chr12 | 42363280 | C    | T   | -- | -- | IGR    | SNP | 0.545 | 20 | 24 |
| <i>PPHLN1</i>   | chr12 | 42819221 | C    | T   | -- | -- | Intron | SNP | 0.355 | 20 | 11 |
| --              | chr12 | 43114501 | G    | A   | -- | -- | IGR    | SNP | 0.417 | 7  | 5  |
| --              | chr12 | 43163210 | G    | T   | -- | -- | IGR    | SNP | 0.100 | 36 | 4  |
| --              | chr12 | 43346679 | C    | G   | -- | -- | IGR    | SNP | 0.595 | 17 | 25 |
| --              | chr12 | 43346753 | C    | T   | -- | -- | IGR    | SNP | 0.591 | 18 | 26 |
| <i>ADAMTS20</i> | chr12 | 43860270 | -    | GTA | -- | -- | Intron | INS | 0.105 | 17 | 2  |
| <i>ADAMTS20</i> | chr12 | 43865089 | A    | G   | -- | -- | Intron | SNP | 0.148 | 23 | 4  |
| <i>TMEM117</i>  | chr12 | 44239287 | G    | A   | -- | -- | Intron | SNP | 0.200 | 12 | 3  |
| <i>TMEM117</i>  | chr12 | 44252770 | C    | G   | -- | -- | Intron | SNP | 0.322 | 40 | 19 |
| <i>TMEM117</i>  | chr12 | 44416509 | A    | T   | -- | -- | Intron | SNP | 0.279 | 31 | 12 |
| <i>TMEM117</i>  | chr12 | 44430857 | C    | A   | -- | -- | Intron | SNP | 0.266 | 47 | 17 |
| <i>TMEM117</i>  | chr12 | 44625312 | T    | C   | -- | -- | Intron | SNP | 0.219 | 25 | 7  |

|          |       |          |        |      |        |        |                 |     |       |    |    |
|----------|-------|----------|--------|------|--------|--------|-----------------|-----|-------|----|----|
| --       | chr12 | 44869633 | C      | G    | --     | --     | IGR             | SNP | 0.655 | 19 | 36 |
| NELL2    | chr12 | 45138140 | T      | C    | --     | --     | Intron          | SNP | 0.333 | 6  | 3  |
| NELL2    | chr12 | 45147335 | A      | G    | --     | --     | Intron          | SNP | 0.324 | 25 | 12 |
| NELL2    | chr12 | 45218688 | T      | G    | --     | --     | Intron          | SNP | 0.615 | 5  | 8  |
| NELL2    | chr12 | 45263119 | C      | A    | --     | --     | Intron          | SNP | 0.207 | 23 | 6  |
| ANO6     | chr12 | 45651864 | G      | T    | --     | --     | Intron          | SNP | 0.219 | 25 | 7  |
| ANO6     | chr12 | 45731558 | A      | G    | --     | --     | Intron          | SNP | 0.469 | 17 | 15 |
| ANO6     | chr12 | 45748903 | G      | T    | --     | --     | Intron          | SNP | 0.316 | 26 | 12 |
| --       | chr12 | 46735679 | -      | GT   | --     | --     | IGR             | INS | 0.114 | 31 | 4  |
| --       | chr12 | 47138794 | A      | C    | --     | --     | IGR             | SNP | 0.156 | 27 | 5  |
| HDAC7    | chr12 | 48204048 | C      | G    | --     | --     | Intron          | SNP | 0.224 | 38 | 11 |
| --       | chr12 | 48677450 | A      | T    | --     | --     | IGR             | SNP | 0.286 | 35 | 14 |
| --       | chr12 | 48832435 | G      | A    | --     | --     | IGR             | SNP | 0.429 | 4  | 3  |
| --       | chr12 | 48832601 | A      | G    | --     | --     | IGR             | SNP | 0.333 | 6  | 3  |
| --       | chr12 | 48939409 | G      | A    | --     | --     | IGR             | SNP | 0.174 | 19 | 4  |
| --       | chr12 | 48953081 | T      | A    | --     | --     | IGR             | SNP | 0.400 | 6  | 4  |
| --       | chr12 | 48969341 | C      | T    | --     | --     | IGR             | SNP | 0.158 | 16 | 3  |
| CCNT1    | chr12 | 49097010 | C      | T    | --     | --     | Intron          | SNP | 0.212 | 26 | 7  |
| --       | chr12 | 49263822 | -      | GTTA | --     | --     | IGR             | INS | 0.219 | 25 | 7  |
| MLL2     | chr12 | 49443770 | T      | A    | A3601T | K1201X | Nonsense_mutat  | SNP | 0.635 | 19 | 33 |
| MLL2     | chr12 | 49444927 | C      | A    | G2539T | E847X  | Nonsense_mutat  | SNP | 0.255 | 38 | 13 |
| --       | chr12 | 49517561 | C      | A    | --     | --     | IGR             | SNP | 0.154 | 22 | 4  |
| SPATS2   | chr12 | 49857032 | AC     | -    | --     | --     | Intron          | DEL | 0.125 | 28 | 4  |
| SPATS2   | chr12 | 49910593 | C      | G    | --     | --     | Intron          | SNP | 0.250 | 24 | 8  |
| --       | chr12 | 49924688 | C      | T    | --     | --     | IGR             | SNP | 0.229 | 37 | 11 |
| --       | chr12 | 49967077 | A      | T    | --     | --     | IGR             | SNP | 0.167 | 45 | 9  |
| FAM186B  | chr12 | 50000311 | A      | C    | --     | --     | 5'Flank         | SNP | 0.180 | 41 | 9  |
| DIP2B    | chr12 | 51123513 | TC     | -    | --     | --     | Intron          | DEL | 0.103 | 35 | 4  |
| TFCP2    | chr12 | 51538722 | T      | A    | --     | --     | Intron          | SNP | 0.292 | 34 | 14 |
| --       | chr12 | 51571737 | C      | T    | --     | --     | IGR             | SNP | 0.200 | 28 | 7  |
| GALNT6   | chr12 | 51771012 | C      | T    | G631A  | E211K  | Missense_mutati | SNP | 0.372 | 27 | 16 |
| KRT7     | chr12 | 52627905 | C      | G    | --     | --     | Intron          | SNP | 0.400 | 6  | 4  |
| --       | chr12 | 53031898 | AAAAAT | -    | --     | --     | IGR             | DEL | 0.200 | 12 | 3  |
| --       | chr12 | 53270444 | C      | T    | --     | --     | IGR             | SNP | 0.617 | 23 | 37 |
| --       | chr12 | 53368522 | G      | C    | --     | --     | IGR             | SNP | 0.364 | 7  | 4  |
| SP1      | chr12 | 53778692 | C      | T    | --     | --     | Intron          | SNP | 0.321 | 36 | 17 |
| SP1      | chr12 | 53804254 | C      | G    | --     | --     | Intron          | SNP | 0.731 | 7  | 19 |
| ATF7     | chr12 | 53981396 | A      | C    | --     | --     | Intron          | SNP | 0.722 | 5  | 13 |
| HOXC4    | chr12 | 54426212 | C      | T    | --     | --     | Intron          | SNP | 0.580 | 29 | 40 |
| FLJ12825 | chr12 | 54492245 | C      | T    | --     | --     | RNA             | SNP | 0.300 | 14 | 6  |
| FLJ12825 | chr12 | 54492246 | G      | A    | --     | --     | RNA             | SNP | 0.300 | 14 | 6  |
| FLJ12825 | chr12 | 54502650 | A      | G    | --     | --     | RNA             | SNP | 0.152 | 39 | 7  |
| FLJ12825 | chr12 | 54502655 | G      | A    | --     | --     | RNA             | SNP | 0.163 | 36 | 7  |
| FLJ12825 | chr12 | 54502660 | C      | T    | --     | --     | RNA             | SNP | 0.152 | 39 | 7  |
| FLJ12825 | chr12 | 54516738 | G      | A    | --     | --     | 3'Flank         | SNP | 0.137 | 44 | 7  |
| ZNF385A  | chr12 | 54777672 | C      | T    | --     | --     | Intron          | SNP | 0.322 | 40 | 19 |
| ZNF385A  | chr12 | 54778073 | C      | G    | --     | --     | Intron          | SNP | 0.340 | 33 | 17 |
| ZNF385A  | chr12 | 54778357 | C      | T    | --     | --     | 5'UTR           | SNP | 0.355 | 20 | 11 |
| ZNF385A  | chr12 | 54778448 | C      | T    | --     | --     | 5'UTR           | SNP | 0.361 | 39 | 22 |
| NCKAP1L  | chr12 | 54899391 | C      | A    | --     | --     | Intron          | SNP | 0.629 | 13 | 22 |
| --       | chr12 | 55208998 | TG     | -    | --     | --     | IGR             | DEL | 0.111 | 16 | 2  |
| --       | chr12 | 55573002 | A      | G    | --     | --     | IGR             | SNP | 0.333 | 28 | 14 |
| --       | chr12 | 55737448 | T      | C    | --     | --     | IGR             | SNP | 0.333 | 24 | 12 |
| --       | chr12 | 55996659 | C      | A    | --     | --     | IGR             | SNP | 0.421 | 11 | 8  |
| --       | chr12 | 55996663 | C      | G    | --     | --     | IGR             | SNP | 0.421 | 11 | 8  |
| ITGA7    | chr12 | 56082448 | A      | T    | --     | --     | Intron          | SNP | 0.222 | 28 | 8  |
| SARNP    | chr12 | 56207346 | G      | T    | --     | --     | Intron          | SNP | 0.190 | 17 | 4  |
| SUOX     | chr12 | 56400119 | G      | T    | --     | --     | 3'Flank         | SNP | 0.200 | 16 | 4  |
| --       | chr12 | 56407939 | C      | A    | --     | --     | IGR             | SNP | 0.190 | 17 | 4  |
| RNF41    | chr12 | 56601126 | T      | C    | --     | --     | Intron          | SNP | 0.279 | 49 | 19 |
| TIMELESS | chr12 | 56829142 | T      | A    | --     | --     | Intron          | SNP | 0.159 | 37 | 7  |
| --       | chr12 | 56897300 | C      | T    | --     | --     | IGR             | SNP | 0.450 | 11 | 9  |
| --       | chr12 | 56897306 | C      | T    | --     | --     | IGR             | SNP | 0.474 | 10 | 9  |
| RBMS2    | chr12 | 56951412 | A      | T    | --     | --     | Intron          | SNP | 0.107 | 25 | 3  |
| PTGES3   | chr12 | 57080783 | T      | C    | --     | --     | Intron          | SNP | 0.190 | 17 | 4  |
| --       | chr12 | 57104292 | C      | T    | --     | --     | IGR             | SNP | 0.238 | 16 | 5  |
| --       | chr12 | 57190042 | T      | C    | --     | --     | IGR             | SNP | 0.138 | 25 | 4  |
| --       | chr12 | 57194530 | G      | C    | --     | --     | IGR             | SNP | 0.261 | 34 | 12 |
| --       | chr12 | 57363160 | G      | T    | --     | --     | IGR             | SNP | 0.147 | 29 | 5  |
| TMEM194A | chr12 | 57462252 | G      | C    | --     | --     | Intron          | SNP | 0.244 | 31 | 10 |
| --       | chr12 | 57761187 | G      | A    | --     | --     | IGR             | SNP | 0.585 | 17 | 24 |
| --       | chr12 | 57767615 | TA     | -    | --     | --     | IGR             | DEL | 0.105 | 17 | 2  |
| --       | chr12 | 58029232 | C      | G    | --     | --     | IGR             | SNP | 0.296 | 19 | 8  |
| --       | chr12 | 58078261 | G      | A    | --     | --     | IGR             | SNP | 0.102 | 53 | 6  |
| --       | chr12 | 58252287 | A      | T    | --     | --     | IGR             | SNP | 0.182 | 18 | 4  |
| --       | chr12 | 58717930 | G      | A    | --     | --     | IGR             | SNP | 0.286 | 25 | 10 |
| --       | chr12 | 58868986 | -      | GT   | --     | --     | IGR             | INS | 0.111 | 16 | 2  |
| --       | chr12 | 59621063 | C      | T    | --     | --     | IGR             | SNP | 0.176 | 14 | 3  |
| --       | chr12 | 59865587 | G      | T    | --     | --     | IGR             | SNP | 0.194 | 29 | 7  |
| --       | chr12 | 59998228 | C      | A    | --     | --     | IGR             | SNP | 0.351 | 24 | 13 |

|          |       |          |       |      |    |    |         |     |       |    |    |
|----------|-------|----------|-------|------|----|----|---------|-----|-------|----|----|
| --       | chr12 | 60028119 | C     | G    | -- | -- | IGR     | SNP | 0.220 | 32 | 9  |
| --       | chr12 | 60054085 | G     | A    | -- | -- | IGR     | SNP | 0.250 | 18 | 6  |
| SLC16A7  | chr12 | 60145363 | G     | C    | -- | -- | Intron  | SNP | 0.200 | 20 | 5  |
| SLC16A7  | chr12 | 60145364 | G     | A    | -- | -- | Intron  | SNP | 0.200 | 20 | 5  |
| SLC16A7  | chr12 | 60145379 | A     | G    | -- | -- | Intron  | SNP | 0.261 | 17 | 6  |
| --       | chr12 | 60245447 | C     | A    | -- | -- | IGR     | SNP | 0.148 | 23 | 4  |
| --       | chr12 | 60848036 | ATG   | -    | -- | -- | IGR     | DEL | 0.296 | 19 | 8  |
| --       | chr12 | 60949979 | A     | T    | -- | -- | IGR     | SNP | 0.176 | 14 | 3  |
| --       | chr12 | 60976827 | C     | A    | -- | -- | IGR     | SNP | 0.261 | 17 | 6  |
| --       | chr12 | 61035475 | C     | G    | -- | -- | IGR     | SNP | 0.158 | 16 | 3  |
| --       | chr12 | 61160343 | C     | T    | -- | -- | IGR     | SNP | 0.333 | 12 | 6  |
| --       | chr12 | 61206232 | G     | A    | -- | -- | IGR     | SNP | 0.182 | 27 | 6  |
| --       | chr12 | 61206273 | T     | C    | -- | -- | IGR     | SNP | 0.174 | 19 | 4  |
| --       | chr12 | 61289660 | C     | T    | -- | -- | IGR     | SNP | 0.268 | 30 | 11 |
| --       | chr12 | 61289911 | C     | G    | -- | -- | IGR     | SNP | 0.333 | 24 | 12 |
| --       | chr12 | 61360783 | A     | C    | -- | -- | IGR     | SNP | 0.400 | 18 | 12 |
| --       | chr12 | 61692287 | -     | ATAC | -- | -- | IGR     | INS | 0.190 | 17 | 4  |
| --       | chr12 | 61692320 | G     | C    | -- | -- | IGR     | SNP | 0.238 | 16 | 5  |
| --       | chr12 | 61692336 | C     | G    | -- | -- | IGR     | SNP | 0.250 | 15 | 5  |
| --       | chr12 | 61697547 | T     | C    | -- | -- | IGR     | SNP | 0.176 | 28 | 6  |
| --       | chr12 | 61796316 | T     | C    | -- | -- | IGR     | SNP | 0.708 | 7  | 17 |
| --       | chr12 | 61866556 | C     | T    | -- | -- | IGR     | SNP | 0.182 | 27 | 6  |
| --       | chr12 | 61866557 | A     | G    | -- | -- | IGR     | SNP | 0.176 | 28 | 6  |
| --       | chr12 | 61892918 | A     | G    | -- | -- | IGR     | SNP | 0.545 | 20 | 24 |
| --       | chr12 | 62044636 | C     | A    | -- | -- | IGR     | SNP | 0.375 | 5  | 3  |
| --       | chr12 | 62817830 | A     | C    | -- | -- | IGR     | SNP | 0.343 | 23 | 12 |
| PPM1H    | chr12 | 63099208 | G     | C    | -- | -- | Intron  | SNP | 0.346 | 34 | 18 |
| PPM1H    | chr12 | 63138569 | C     | T    | -- | -- | Intron  | SNP | 0.308 | 36 | 16 |
| --       | chr12 | 63944593 | C     | A    | -- | -- | IGR     | SNP | 0.308 | 9  | 4  |
| --       | chr12 | 64124019 | A     | C    | -- | -- | IGR     | SNP | 0.471 | 18 | 16 |
| --       | chr12 | 64155477 | A     | G    | -- | -- | IGR     | SNP | 0.190 | 34 | 8  |
| SRGAP1   | chr12 | 64487506 | G     | A    | -- | -- | Intron  | SNP | 0.270 | 27 | 10 |
| --       | chr12 | 64552237 | C     | A    | -- | -- | IGR     | SNP | 0.174 | 38 | 8  |
| FLJ41278 | chr12 | 65366297 | A     | T    | -- | -- | RNA     | SNP | 0.375 | 5  | 3  |
| FLJ41278 | chr12 | 65370034 | A     | T    | -- | -- | RNA     | SNP | 0.250 | 36 | 12 |
| --       | chr12 | 65541902 | T     | C    | -- | -- | IGR     | SNP | 0.619 | 8  | 13 |
| LEMD3    | chr12 | 65570052 | T     | G    | -- | -- | Intron  | SNP | 0.211 | 30 | 8  |
| LEMD3    | chr12 | 65626567 | -     | CT   | -- | -- | Intron  | INS | 0.267 | 22 | 8  |
| MSRB3    | chr12 | 65729907 | C     | G    | -- | -- | Intron  | SNP | 0.692 | 8  | 18 |
| MSRB3    | chr12 | 65769093 | C     | T    | -- | -- | Intron  | SNP | 0.464 | 15 | 13 |
| RPSAP52  | chr12 | 66188148 | C     | T    | -- | -- | RNA     | SNP | 0.185 | 22 | 5  |
| RPSAP52  | chr12 | 66197746 | A     | C    | -- | -- | RNA     | SNP | 0.500 | 20 | 20 |
| HMGA2    | chr12 | 66325371 | T     | G    | -- | -- | Intron  | SNP | 0.161 | 26 | 5  |
| IRAK3    | chr12 | 66602726 | A     | T    | -- | -- | Intron  | SNP | 0.533 | 7  | 8  |
| --       | chr12 | 66663204 | G     | T    | -- | -- | IGR     | SNP | 0.205 | 35 | 9  |
| --       | chr12 | 66682036 | G     | T    | -- | -- | IGR     | SNP | 0.268 | 30 | 11 |
| GRIP1    | chr12 | 66754095 | C     | G    | -- | -- | Intron  | SNP | 0.278 | 26 | 10 |
| GRIP1    | chr12 | 66813969 | A     | C    | -- | -- | Intron  | SNP | 0.286 | 20 | 8  |
| --       | chr12 | 67115064 | T     | C    | -- | -- | IGR     | SNP | 0.326 | 31 | 15 |
| --       | chr12 | 67400375 | A     | T    | -- | -- | IGR     | SNP | 0.381 | 26 | 16 |
| --       | chr12 | 67433812 | GA    | -    | -- | -- | IGR     | DEL | 0.219 | 25 | 7  |
| --       | chr12 | 67566486 | G     | T    | -- | -- | IGR     | SNP | 0.327 | 33 | 16 |
| --       | chr12 | 67570851 | G     | A    | -- | -- | IGR     | SNP | 0.333 | 12 | 6  |
| --       | chr12 | 68239597 | C     | T    | -- | -- | IGR     | SNP | 0.308 | 9  | 4  |
| --       | chr12 | 68336231 | C     | T    | -- | -- | IGR     | SNP | 0.148 | 46 | 8  |
| --       | chr12 | 68448266 | C     | G    | -- | -- | IGR     | SNP | 0.750 | 1  | 3  |
| --       | chr12 | 68813857 | C     | G    | -- | -- | IGR     | SNP | 0.240 | 19 | 6  |
| --       | chr12 | 68814385 | C     | T    | -- | -- | IGR     | SNP | 0.261 | 34 | 12 |
| --       | chr12 | 68951049 | A     | T    | -- | -- | IGR     | SNP | 0.160 | 21 | 4  |
| SLC35E3  | chr12 | 69157164 | T     | C    | -- | -- | Intron  | SNP | 0.378 | 23 | 14 |
| --       | chr12 | 69426170 | G     | A    | -- | -- | IGR     | SNP | 0.200 | 36 | 9  |
| --       | chr12 | 69594607 | TGAGG | -    | -- | -- | IGR     | DEL | 0.111 | 16 | 2  |
| --       | chr12 | 70009992 | C     | A    | -- | -- | IGR     | SNP | 0.260 | 57 | 20 |
| BEST3    | chr12 | 70047016 | A     | G    | -- | -- | 3'Flank | SNP | 0.339 | 41 | 21 |
| BEST3    | chr12 | 70093463 | C     | T    | -- | -- | 5'Flank | SNP | 0.261 | 17 | 6  |
| --       | chr12 | 70223150 | C     | T    | -- | -- | IGR     | SNP | 0.278 | 39 | 15 |
| --       | chr12 | 70487682 | AAAG  | -    | -- | -- | IGR     | DEL | 0.167 | 20 | 4  |
| --       | chr12 | 70487686 | AAAG  | -    | -- | -- | IGR     | DEL | 0.154 | 22 | 4  |
| --       | chr12 | 70847922 | C     | T    | -- | -- | IGR     | SNP | 0.214 | 22 | 6  |
| --       | chr12 | 70870676 | G     | A    | -- | -- | IGR     | SNP | 0.324 | 25 | 12 |
| --       | chr12 | 70876290 | T     | G    | -- | -- | IGR     | SNP | 0.417 | 21 | 15 |
| PTPRR    | chr12 | 71124583 | GGA   | -    | -- | -- | Intron  | DEL | 0.115 | 46 | 6  |
| --       | chr12 | 71319907 | C     | G    | -- | -- | IGR     | SNP | 0.533 | 14 | 16 |
| LGR5     | chr12 | 71879662 | C     | A    | -- | -- | Intron  | SNP | 0.306 | 25 | 11 |
| LGR5     | chr12 | 71904514 | A     | T    | -- | -- | Intron  | SNP | 0.176 | 61 | 13 |
| TPH2     | chr12 | 72415750 | A     | C    | -- | -- | Intron  | SNP | 0.200 | 28 | 7  |
| --       | chr12 | 72586527 | G     | T    | -- | -- | IGR     | SNP | 0.286 | 30 | 12 |
| TRHDE    | chr12 | 72772856 | G     | C    | -- | -- | Intron  | SNP | 0.324 | 23 | 11 |
| TRHDE    | chr12 | 72913739 | C     | T    | -- | -- | Intron  | SNP | 0.606 | 13 | 20 |
| --       | chr12 | 73088963 | G     | A    | -- | -- | IGR     | SNP | 0.286 | 20 | 8  |

|          |       |          |      |       |             |             |                 |     |       |    |    |
|----------|-------|----------|------|-------|-------------|-------------|-----------------|-----|-------|----|----|
| --       | chr12 | 73099902 | C    | A     | --          | --          | IGR             | SNP | 0.130 | 20 | 3  |
| --       | chr12 | 73513961 | A    | G     | --          | --          | IGR             | SNP | 0.231 | 30 | 9  |
| --       | chr12 | 73632573 | C    | T     | --          | --          | IGR             | SNP | 0.538 | 18 | 21 |
| --       | chr12 | 73643533 | T    | A     | --          | --          | IGR             | SNP | 0.625 | 12 | 20 |
| --       | chr12 | 73822471 | T    | A     | --          | --          | IGR             | SNP | 0.310 | 20 | 9  |
| --       | chr12 | 73845076 | AAT  | -     | --          | --          | IGR             | DEL | 0.111 | 16 | 2  |
| --       | chr12 | 73892668 | T    | C     | --          | --          | IGR             | SNP | 0.200 | 16 | 4  |
| --       | chr12 | 74151919 | T    | C     | --          | --          | IGR             | SNP | 0.315 | 37 | 17 |
| --       | chr12 | 74178585 | A    | C     | --          | --          | IGR             | SNP | 0.382 | 21 | 13 |
| --       | chr12 | 74322870 | -    | ACT   | --          | --          | IGR             | INS | 0.111 | 16 | 2  |
| --       | chr12 | 74976021 | C    | T     | --          | --          | IGR             | SNP | 0.222 | 35 | 10 |
| --       | chr12 | 75146607 | T    | G     | --          | --          | IGR             | SNP | 0.200 | 32 | 8  |
| KCNC2    | chr12 | 75532271 | G    | C     | --          | --          | Intron          | SNP | 0.222 | 21 | 6  |
| KCNC2    | chr12 | 75585520 | C    | T     | --          | --          | Intron          | SNP | 0.238 | 16 | 5  |
| --       | chr12 | 75650240 | A    | C     | --          | --          | IGR             | SNP | 0.233 | 33 | 10 |
| CAPS2    | chr12 | 75674613 | T    | G     | --          | --          | Intron          | SNP | 0.310 | 20 | 9  |
| --       | chr12 | 76125581 | AG   | -     | --          | --          | IGR             | DEL | 0.125 | 14 | 2  |
| --       | chr12 | 76288606 | A    | G     | --          | --          | IGR             | SNP | 0.188 | 26 | 6  |
| --       | chr12 | 76346002 | C    | T     | --          | --          | IGR             | SNP | 0.190 | 17 | 4  |
| --       | chr12 | 76409626 | C    | T     | --          | --          | IGR             | SNP | 0.571 | 21 | 28 |
| NAP1L1   | chr12 | 76467558 | -    | CTTCT | --          | --          | Intron          | INS | 0.315 | 36 | 17 |
| --       | chr12 | 76596183 | C    | T     | --          | --          | IGR             | SNP | 0.466 | 31 | 27 |
| OSBPL8   | chr12 | 76784402 | T    | A     | A965T,A839T | K322M,K280M | Missense_mutati | SNP | 0.160 | 42 | 8  |
| --       | chr12 | 77101712 | C    | G     | --          | --          | IGR             | SNP | 0.548 | 14 | 17 |
| --       | chr12 | 77145893 | C    | G     | --          | --          | IGR             | SNP | 0.216 | 29 | 8  |
| --       | chr12 | 77699632 | C    | T     | --          | --          | IGR             | SNP | 0.649 | 13 | 24 |
| --       | chr12 | 77993231 | C    | T     | --          | --          | IGR             | SNP | 0.643 | 10 | 18 |
| --       | chr12 | 78079911 | -    | TTATG | --          | --          | IGR             | INS | 0.220 | 39 | 11 |
| --       | chr12 | 78143110 | T    | C     | --          | --          | IGR             | SNP | 0.361 | 23 | 13 |
| NAV3     | chr12 | 78441404 | C    | T     | --          | --          | Intron          | SNP | 0.767 | 7  | 23 |
| NAV3     | chr12 | 78544452 | T    | C     | --          | --          | Intron          | SNP | 0.161 | 26 | 5  |
| --       | chr12 | 78673612 | G    | A     | --          | --          | IGR             | SNP | 0.306 | 34 | 15 |
| --       | chr12 | 78927621 | T    | G     | --          | --          | IGR             | SNP | 0.556 | 16 | 20 |
| --       | chr12 | 79009476 | C    | G     | --          | --          | IGR             | SNP | 0.250 | 33 | 11 |
| --       | chr12 | 79023903 | A    | G     | --          | --          | IGR             | SNP | 0.286 | 15 | 6  |
| --       | chr12 | 79029903 | A    | G     | --          | --          | IGR             | SNP | 0.667 | 16 | 32 |
| --       | chr12 | 79069247 | C    | A     | --          | --          | IGR             | SNP | 0.184 | 31 | 7  |
| --       | chr12 | 79107562 | G    | A     | --          | --          | IGR             | SNP | 0.545 | 15 | 18 |
| SYT1     | chr12 | 79560245 | -    | TA    | --          | --          | Intron          | INS | 0.306 | 25 | 11 |
| SYT1     | chr12 | 79699407 | A    | T     | --          | --          | Intron          | SNP | 0.617 | 18 | 29 |
| --       | chr12 | 79938485 | T    | C     | --          | --          | IGR             | SNP | 0.130 | 20 | 3  |
| --       | chr12 | 80153196 | C    | T     | --          | --          | IGR             | SNP | 0.625 | 12 | 20 |
| PPP1R12A | chr12 | 80240395 | G    | T     | --          | --          | Intron          | SNP | 0.250 | 12 | 4  |
| --       | chr12 | 80364749 | CT   | -     | --          | --          | IGR             | DEL | 0.242 | 25 | 8  |
| OTOGL    | chr12 | 80652927 | -    | CTA   | --          | --          | Intron          | INS | 0.313 | 11 | 5  |
| PTPRQ    | chr12 | 80919678 | C    | T     | --          | --          | Intron          | SNP | 0.389 | 22 | 14 |
| PTPRQ    | chr12 | 80931698 | C    | G     | --          | --          | Intron          | SNP | 0.333 | 26 | 13 |
| PTPRQ    | chr12 | 81070077 | G    | A     | --          | --          | Intron          | SNP | 0.283 | 38 | 15 |
| --       | chr12 | 81179864 | -    | TA    | --          | --          | IGR             | INS | 0.125 | 14 | 2  |
| LIN7A    | chr12 | 81235185 | A    | G     | --          | --          | Intron          | SNP | 0.143 | 18 | 3  |
| --       | chr12 | 81442020 | T    | C     | --          | --          | IGR             | SNP | 0.273 | 8  | 3  |
| ACSS3    | chr12 | 81502264 | G    | T     | --          | --          | Intron          | SNP | 0.261 | 17 | 6  |
| PPFIA2   | chr12 | 82043057 | C    | T     | --          | --          | Intron          | SNP | 0.208 | 38 | 10 |
| --       | chr12 | 82221425 | C    | T     | --          | --          | IGR             | SNP | 0.225 | 31 | 9  |
| --       | chr12 | 82304443 | T    | A     | --          | --          | IGR             | SNP | 0.121 | 29 | 4  |
| --       | chr12 | 82547844 | G    | C     | --          | --          | IGR             | SNP | 0.333 | 38 | 19 |
| --       | chr12 | 82638468 | T    | C     | --          | --          | IGR             | SNP | 0.219 | 25 | 7  |
| --       | chr12 | 82638469 | C    | A     | --          | --          | IGR             | SNP | 0.226 | 24 | 7  |
| --       | chr12 | 82720335 | T    | A     | --          | --          | IGR             | SNP | 0.625 | 6  | 10 |
| --       | chr12 | 82924643 | C    | A     | --          | --          | IGR             | SNP | 0.152 | 28 | 5  |
| --       | chr12 | 82942344 | A    | G     | --          | --          | IGR             | SNP | 0.174 | 19 | 4  |
| --       | chr12 | 83046782 | T    | C     | --          | --          | IGR             | SNP | 0.160 | 21 | 4  |
| --       | chr12 | 83046972 | A    | G     | --          | --          | IGR             | SNP | 0.250 | 9  | 3  |
| --       | chr12 | 83046994 | T    | A     | --          | --          | IGR             | SNP | 0.273 | 8  | 3  |
| TMTC2    | chr12 | 83116175 | T    | A     | --          | --          | Intron          | SNP | 0.600 | 4  | 6  |
| TMTC2    | chr12 | 83163674 | C    | A     | --          | --          | Intron          | SNP | 0.290 | 22 | 9  |
| --       | chr12 | 83537085 | T    | G     | --          | --          | IGR             | SNP | 0.271 | 35 | 13 |
| --       | chr12 | 83541095 | G    | A     | --          | --          | IGR             | SNP | 0.556 | 16 | 20 |
| --       | chr12 | 83822838 | G    | T     | --          | --          | IGR             | SNP | 0.500 | 4  | 4  |
| --       | chr12 | 83938449 | T    | G     | --          | --          | IGR             | SNP | 0.333 | 20 | 10 |
| --       | chr12 | 83938450 | G    | T     | --          | --          | IGR             | SNP | 0.321 | 19 | 9  |
| --       | chr12 | 84020914 | G    | T     | --          | --          | IGR             | SNP | 0.273 | 32 | 12 |
| --       | chr12 | 84078504 | -    | TA    | --          | --          | IGR             | INS | 0.176 | 14 | 3  |
| --       | chr12 | 84218393 | TTTG | -     | --          | --          | IGR             | DEL | 0.129 | 27 | 4  |
| --       | chr12 | 84995528 | G    | A     | --          | --          | IGR             | SNP | 0.644 | 16 | 29 |
| --       | chr12 | 85194832 | C    | T     | --          | --          | IGR             | SNP | 0.227 | 34 | 10 |
| --       | chr12 | 85720305 | C    | G     | --          | --          | IGR             | SNP | 0.367 | 19 | 11 |
| --       | chr12 | 85879583 | A    | C     | --          | --          | IGR             | SNP | 0.279 | 31 | 12 |
| --       | chr12 | 85972872 | C    | T     | --          | --          | IGR             | SNP | 0.571 | 21 | 28 |
| --       | chr12 | 86049516 | A    | G     | --          | --          | IGR             | SNP | 0.176 | 28 | 6  |

|             |       |           |       |     |    |    |         |     |       |    |    |
|-------------|-------|-----------|-------|-----|----|----|---------|-----|-------|----|----|
| MGAT4C      | chr12 | 86433368  | C     | A   | -- | -- | Intron  | SNP | 0.500 | 20 | 20 |
| MGAT4C      | chr12 | 86541687  | C     | G   | -- | -- | Intron  | SNP | 0.269 | 19 | 7  |
| MGAT4C      | chr12 | 86813364  | A     | G   | -- | -- | Intron  | SNP | 0.567 | 13 | 17 |
| MGAT4C      | chr12 | 86983666  | C     | T   | -- | -- | Intron  | SNP | 0.471 | 18 | 16 |
| MGAT4C      | chr12 | 87102385  | G     | T   | -- | -- | Intron  | SNP | 0.283 | 38 | 15 |
| --          | chr12 | 87284568  | T     | C   | -- | -- | IGR     | SNP | 0.231 | 20 | 6  |
| --          | chr12 | 87643625  | A     | T   | -- | -- | IGR     | SNP | 0.132 | 46 | 7  |
| --          | chr12 | 87679922  | A     | G   | -- | -- | IGR     | SNP | 0.611 | 14 | 22 |
| --          | chr12 | 88168905  | C     | A   | -- | -- | IGR     | SNP | 0.478 | 12 | 11 |
| --          | chr12 | 88225706  | -     | AG  | -- | -- | IGR     | INS | 0.111 | 40 | 5  |
| --          | chr12 | 88227375  | T     | A   | -- | -- | IGR     | SNP | 0.379 | 18 | 11 |
| --          | chr12 | 88331214  | G     | A   | -- | -- | IGR     | SNP | 0.259 | 20 | 7  |
| --          | chr12 | 88345038  | C     | T   | -- | -- | IGR     | SNP | 0.157 | 43 | 8  |
| CEP290      | chr12 | 88464557  | G     | A   | -- | -- | Intron  | SNP | 0.628 | 16 | 27 |
| CEP290      | chr12 | 88505938  | T     | C   | -- | -- | Intron  | SNP | 0.267 | 22 | 8  |
| --          | chr12 | 89052150  | A     | C   | -- | -- | IGR     | SNP | 0.250 | 39 | 13 |
| --          | chr12 | 89092278  | T     | C   | -- | -- | IGR     | SNP | 0.283 | 33 | 13 |
| --          | chr12 | 89333390  | C     | T   | -- | -- | IGR     | SNP | 0.400 | 3  | 2  |
| --          | chr12 | 89343020  | G     | A   | -- | -- | IGR     | SNP | 0.139 | 31 | 5  |
| --          | chr12 | 89806149  | TG    | -   | -- | -- | IGR     | DEL | 0.150 | 17 | 3  |
| --          | chr12 | 90321422  | C     | G   | -- | -- | IGR     | SNP | 0.359 | 25 | 14 |
| --          | chr12 | 90336347  | -     | AC  | -- | -- | IGR     | INS | 0.118 | 15 | 2  |
| --          | chr12 | 90861397  | CTTT  | -   | -- | -- | IGR     | DEL | 0.125 | 28 | 4  |
| --          | chr12 | 90863518  | G     | T   | -- | -- | IGR     | SNP | 0.174 | 19 | 4  |
| --          | chr12 | 91426633  | A     | G   | -- | -- | IGR     | SNP | 0.229 | 37 | 11 |
| DCN         | chr12 | 91563180  | C     | A   | -- | -- | Intron  | SNP | 0.273 | 16 | 6  |
| --          | chr12 | 91643842  | C     | G   | -- | -- | IGR     | SNP | 0.271 | 43 | 16 |
| --          | chr12 | 91687250  | A     | T   | -- | -- | IGR     | SNP | 0.103 | 26 | 3  |
| --          | chr12 | 92230597  | TAGA  | -   | -- | -- | IGR     | DEL | 0.686 | 16 | 35 |
| --          | chr12 | 92329803  | -     | GTT | -- | -- | IGR     | INS | 0.133 | 13 | 2  |
| --          | chr12 | 92660435  | G     | T   | -- | -- | IGR     | SNP | 0.214 | 44 | 12 |
| --          | chr12 | 92913719  | GA    | -   | -- | -- | IGR     | DEL | 0.115 | 23 | 3  |
| --          | chr12 | 93076937  | G     | A   | -- | -- | IGR     | SNP | 0.333 | 14 | 7  |
| EEA1        | chr12 | 93295533  | C     | T   | -- | -- | Intron  | SNP | 0.367 | 19 | 11 |
| --          | chr12 | 93340378  | T     | A   | -- | -- | IGR     | SNP | 0.308 | 9  | 4  |
| LOC643339   | chr12 | 93449216  | G     | A   | -- | -- | RNA     | SNP | 0.179 | 32 | 7  |
| LOC643339   | chr12 | 93707332  | C     | G   | -- | -- | RNA     | SNP | 0.587 | 19 | 27 |
| --          | chr12 | 93929408  | C     | T   | -- | -- | IGR     | SNP | 0.160 | 42 | 8  |
| --          | chr12 | 94055181  | C     | G   | -- | -- | IGR     | SNP | 0.324 | 25 | 12 |
| CRADD       | chr12 | 94118172  | A     | T   | -- | -- | Intron  | SNP | 0.167 | 20 | 4  |
| --          | chr12 | 94305391  | C     | G   | -- | -- | IGR     | SNP | 0.250 | 24 | 8  |
| PLXNC1      | chr12 | 94588399  | G     | A   | -- | -- | Intron  | SNP | 0.127 | 48 | 7  |
| --          | chr12 | 95056489  | AG    | -   | -- | -- | IGR     | DEL | 0.103 | 35 | 4  |
| VEZT        | chr12 | 95629877  | A     | C   | -- | -- | Intron  | SNP | 0.308 | 9  | 4  |
| VEZT        | chr12 | 95630041  | A     | G   | -- | -- | Intron  | SNP | 0.147 | 29 | 5  |
| --          | chr12 | 95814204  | G     | T   | -- | -- | IGR     | SNP | 0.148 | 23 | 4  |
| METAP2, USP | chr12 | 95909899  | T     | G   | -- | -- | 3'Flank | SNP | 0.286 | 10 | 4  |
| --          | chr12 | 95961379  | T     | C   | -- | -- | IGR     | SNP | 0.143 | 24 | 4  |
| CCDC38      | chr12 | 96269288  | ACAAT | -   | -- | -- | Intron  | DEL | 0.214 | 33 | 9  |
| --          | chr12 | 96468639  | A     | G   | -- | -- | IGR     | SNP | 0.262 | 45 | 16 |
| CDK17       | chr12 | 96709757  | C     | T   | -- | -- | Intron  | SNP | 0.160 | 21 | 4  |
| --          | chr12 | 97033667  | T     | G   | -- | -- | IGR     | SNP | 0.538 | 12 | 14 |
| --          | chr12 | 97147671  | A     | G   | -- | -- | IGR     | SNP | 0.314 | 24 | 11 |
| --          | chr12 | 97202021  | C     | A   | -- | -- | IGR     | SNP | 0.362 | 30 | 17 |
| --          | chr12 | 97222773  | A     | G   | -- | -- | IGR     | SNP | 0.313 | 22 | 10 |
| --          | chr12 | 97228579  | C     | T   | -- | -- | IGR     | SNP | 0.164 | 46 | 9  |
| --          | chr12 | 97228580  | T     | A   | -- | -- | IGR     | SNP | 0.161 | 47 | 9  |
| --          | chr12 | 97493749  | C     | G   | -- | -- | IGR     | SNP | 0.290 | 22 | 9  |
| --          | chr12 | 97690863  | C     | A   | -- | -- | IGR     | SNP | 0.438 | 27 | 21 |
| --          | chr12 | 97802603  | G     | T   | -- | -- | IGR     | SNP | 0.429 | 4  | 3  |
| --          | chr12 | 98045285  | C     | A   | -- | -- | IGR     | SNP | 0.176 | 14 | 3  |
| --          | chr12 | 98364241  | C     | G   | -- | -- | IGR     | SNP | 0.488 | 21 | 20 |
| --          | chr12 | 98383068  | A     | G   | -- | -- | IGR     | SNP | 0.143 | 42 | 7  |
| --          | chr12 | 98902416  | C     | T   | -- | -- | IGR     | SNP | 0.214 | 11 | 3  |
| --          | chr12 | 98951450  | C     | T   | -- | -- | IGR     | SNP | 0.271 | 35 | 13 |
| APAF1       | chr12 | 99111390  | G     | T   | -- | -- | Intron  | SNP | 0.323 | 21 | 10 |
| ANKS1B      | chr12 | 99189667  | T     | C   | -- | -- | Intron  | SNP | 0.353 | 33 | 18 |
| ANKS1B      | chr12 | 99242853  | C     | T   | -- | -- | Intron  | SNP | 0.325 | 27 | 13 |
| ANKS1B      | chr12 | 99299518  | C     | G   | -- | -- | Intron  | SNP | 0.347 | 32 | 17 |
| ANKS1B      | chr12 | 99300190  | T     | A   | -- | -- | Intron  | SNP | 0.579 | 16 | 22 |
| ANKS1B      | chr12 | 99309746  | C     | A   | -- | -- | Intron  | SNP | 0.719 | 16 | 41 |
| ANKS1B      | chr12 | 99367004  | AT    | -   | -- | -- | Intron  | DEL | 0.161 | 26 | 5  |
| ANKS1B      | chr12 | 99592464  | C     | G   | -- | -- | Intron  | SNP | 0.205 | 35 | 9  |
| ANKS1B      | chr12 | 99959464  | T     | A   | -- | -- | Intron  | SNP | 0.167 | 25 | 5  |
| ANKS1B      | chr12 | 99980771  | -     | CAT | -- | -- | Intron  | INS | 0.250 | 26 | 9  |
| ANKS1B      | chr12 | 100054160 | G     | T   | -- | -- | Intron  | SNP | 0.235 | 13 | 4  |
| --          | chr12 | 100425577 | T     | A   | -- | -- | IGR     | SNP | 0.323 | 21 | 10 |
| SCYL2       | chr12 | 100715839 | G     | A   | -- | -- | Intron  | SNP | 0.208 | 19 | 5  |
| NR1H4       | chr12 | 100901762 | AAAG  | -   | -- | -- | Intron  | DEL | 0.237 | 29 | 9  |
| --          | chr12 | 101154924 | C     | A   | -- | -- | IGR     | SNP | 0.351 | 24 | 13 |

|             |       |           |     |       |    |    |         |     |       |    |    |
|-------------|-------|-----------|-----|-------|----|----|---------|-----|-------|----|----|
| ANO4        | chr12 | 101200439 | C   | T     | -- | -- | Intron  | SNP | 0.615 | 10 | 16 |
| ANO4        | chr12 | 101380348 | C   | A     | -- | -- | Intron  | SNP | 0.222 | 35 | 10 |
| SLC5A8      | chr12 | 101603732 | C   | T     | -- | -- | 5'UTR   | SNP | 0.348 | 43 | 23 |
| --          | chr12 | 101785576 | C   | T     | -- | -- | IGR     | SNP | 0.263 | 14 | 5  |
| --          | chr12 | 101785587 | A   | T     | -- | -- | IGR     | SNP | 0.235 | 13 | 4  |
| --          | chr12 | 101785623 | G   | A     | -- | -- | IGR     | SNP | 0.263 | 14 | 5  |
| --          | chr12 | 101857723 | C   | G     | -- | -- | IGR     | SNP | 0.289 | 27 | 11 |
| SPIC        | chr12 | 101870421 | G   | C     | -- | -- | 5'Flank | SNP | 0.621 | 11 | 18 |
| --          | chr12 | 101944079 | G   | A     | -- | -- | IGR     | SNP | 0.232 | 43 | 13 |
| C12orf48    | chr12 | 102549984 | A   | T     | -- | -- | Intron  | SNP | 0.211 | 15 | 4  |
| IGF1        | chr12 | 102863621 | T   | C     | -- | -- | Intron  | SNP | 0.353 | 22 | 12 |
| --          | chr12 | 102916904 | G   | T     | -- | -- | IGR     | SNP | 0.395 | 26 | 17 |
| --          | chr12 | 103113861 | C   | G     | -- | -- | IGR     | SNP | 0.103 | 35 | 4  |
| --          | chr12 | 103174725 | G   | C     | -- | -- | IGR     | SNP | 0.333 | 20 | 10 |
| --          | chr12 | 103197917 | G   | A     | -- | -- | IGR     | SNP | 0.302 | 30 | 13 |
| PAH         | chr12 | 103248741 | G   | A     | -- | -- | Intron  | SNP | 0.672 | 20 | 41 |
| --          | chr12 | 103483397 | C   | G     | -- | -- | IGR     | SNP | 0.114 | 31 | 4  |
| --          | chr12 | 103621024 | G   | T     | -- | -- | IGR     | SNP | 0.345 | 19 | 10 |
| C12orf42    | chr12 | 103750971 | G   | T     | -- | -- | Intron  | SNP | 0.583 | 5  | 7  |
| GNN         | chr12 | 104323620 | G   | C     | -- | -- | RNA     | SNP | 0.353 | 11 | 6  |
| HCFC2       | chr12 | 104469235 | C   | T     | -- | -- | Intron  | SNP | 0.267 | 11 | 4  |
| TXNRD1      | chr12 | 104628927 | G   | T     | -- | -- | Intron  | SNP | 0.190 | 51 | 12 |
| CHST11      | chr12 | 104949837 | G   | T     | -- | -- | Intron  | SNP | 0.235 | 26 | 8  |
| SLC41A2     | chr12 | 105220353 | C   | G     | -- | -- | Intron  | SNP | 0.239 | 35 | 11 |
| --          | chr12 | 105721313 | T   | C     | -- | -- | IGR     | SNP | 0.217 | 18 | 5  |
| --          | chr12 | 106083307 | C   | T     | -- | -- | IGR     | SNP | 0.346 | 34 | 18 |
| NUAK1       | chr12 | 106458579 | -   | CA    | -- | -- | 3'UTR   | INS | 0.333 | 28 | 14 |
| CKAP4       | chr12 | 106639391 | G   | T     | -- | -- | Intron  | SNP | 0.174 | 19 | 4  |
| LOC10028794 | chr12 | 106975150 | G   | A     | -- | -- | RNA     | SNP | 0.261 | 17 | 6  |
| LOC10028794 | chr12 | 107071599 | A   | T     | -- | -- | RNA     | SNP | 0.672 | 20 | 41 |
| RIC8B       | chr12 | 107170808 | T   | A     | -- | -- | Intron  | SNP | 0.415 | 31 | 22 |
| --          | chr12 | 107331207 | G   | T     | -- | -- | IGR     | SNP | 0.237 | 29 | 9  |
| C12orf23    | chr12 | 107368421 | G   | C     | -- | -- | 3'Flank | SNP | 0.130 | 40 | 6  |
| PRDM4       | chr12 | 108132655 | A   | C     | -- | -- | Intron  | SNP | 0.108 | 33 | 4  |
| WSCD2       | chr12 | 108585641 | G   | A     | -- | -- | Intron  | SNP | 0.158 | 32 | 6  |
| --          | chr12 | 108966957 | G   | A     | -- | -- | IGR     | SNP | 0.294 | 24 | 10 |
| --          | chr12 | 109012680 | C   | T     | -- | -- | IGR     | SNP | 0.727 | 15 | 40 |
| SSH1        | chr12 | 109231697 | T   | A     | -- | -- | Intron  | SNP | 0.310 | 29 | 13 |
| SVOP        | chr12 | 109436411 | A   | G     | -- | -- | Intron  | SNP | 0.455 | 6  | 5  |
| SVOP        | chr12 | 109436437 | C   | A     | -- | -- | Intron  | SNP | 0.308 | 9  | 4  |
| SVOP        | chr12 | 109436440 | T   | G     | -- | -- | Intron  | SNP | 0.357 | 9  | 5  |
| SVOP        | chr12 | 109447949 | T   | A     | -- | -- | Intron  | SNP | 0.333 | 8  | 4  |
| USP30       | chr12 | 109513639 | A   | T     | -- | -- | Intron  | SNP | 0.231 | 30 | 9  |
| IFT81       | chr12 | 110622990 | A   | T     | -- | -- | Intron  | SNP | 0.368 | 24 | 14 |
| --          | chr12 | 110702115 | C   | G     | -- | -- | IGR     | SNP | 0.128 | 34 | 5  |
| --          | chr12 | 110802375 | -   | CATAA | -- | -- | IGR     | INS | 0.150 | 17 | 3  |
| --          | chr12 | 110802974 | C   | G     | -- | -- | IGR     | SNP | 0.167 | 20 | 4  |
| TCTN1       | chr12 | 111056519 | G   | T     | -- | -- | Intron  | SNP | 0.163 | 36 | 7  |
| --          | chr12 | 111206514 | CTA | -     | -- | -- | IGR     | DEL | 0.143 | 12 | 2  |
| --          | chr12 | 111215595 | C   | G     | -- | -- | IGR     | SNP | 0.208 | 38 | 10 |
| CCDC63      | chr12 | 111304395 | C   | A     | -- | -- | Intron  | SNP | 0.357 | 9  | 5  |
| CCDC63      | chr12 | 111338030 | A   | T     | -- | -- | Intron  | SNP | 0.563 | 21 | 27 |
| ATXN2       | chr12 | 111905141 | G   | T     | -- | -- | Intron  | SNP | 0.235 | 13 | 4  |
| --          | chr12 | 112346459 | A   | T     | -- | -- | IGR     | SNP | 0.643 | 15 | 27 |
| NAA25       | chr12 | 112485052 | G   | T     | -- | -- | Intron  | SNP | 0.200 | 16 | 4  |
| NAA25       | chr12 | 112538442 | G   | T     | -- | -- | Intron  | SNP | 0.267 | 11 | 4  |
| C12orf51    | chr12 | 112648167 | G   | A     | -- | -- | Intron  | SNP | 0.411 | 33 | 23 |
| RPL6        | chr12 | 112843849 | G   | T     | -- | -- | Intron  | SNP | 0.700 | 18 | 42 |
| --          | chr12 | 113206063 | C   | G     | -- | -- | IGR     | SNP | 0.317 | 41 | 19 |
| OAS2        | chr12 | 113441075 | T   | A     | -- | -- | Intron  | SNP | 0.240 | 38 | 12 |
| --          | chr12 | 113470372 | T   | A     | -- | -- | IGR     | SNP | 0.288 | 37 | 15 |
| --          | chr12 | 113481871 | C   | T     | -- | -- | IGR     | SNP | 0.289 | 32 | 13 |
| RASAL1      | chr12 | 113570173 | C   | T     | -- | -- | Intron  | SNP | 0.457 | 19 | 16 |
| TPCN1       | chr12 | 113721979 | G   | A     | -- | -- | Intron  | SNP | 0.269 | 38 | 14 |
| --          | chr12 | 113781424 | AGT | -     | -- | -- | IGR     | DEL | 0.250 | 15 | 5  |
| --          | chr12 | 114072525 | G   | A     | -- | -- | IGR     | SNP | 0.292 | 17 | 7  |
| --          | chr12 | 114215062 | G   | A     | -- | -- | IGR     | SNP | 0.231 | 10 | 3  |
| --          | chr12 | 114416437 | G   | C     | -- | -- | IGR     | SNP | 0.333 | 30 | 15 |
| --          | chr12 | 115217834 | C   | T     | -- | -- | IGR     | SNP | 0.179 | 23 | 5  |
| --          | chr12 | 115296560 | C   | G     | -- | -- | IGR     | SNP | 0.306 | 34 | 15 |
| --          | chr12 | 115342876 | G   | T     | -- | -- | IGR     | SNP | 0.510 | 25 | 26 |
| --          | chr12 | 115655956 | C   | G     | -- | -- | IGR     | SNP | 0.608 | 31 | 48 |
| --          | chr12 | 115656048 | -   | TGATA | -- | -- | IGR     | INS | 0.162 | 62 | 12 |
| --          | chr12 | 115694335 | G   | A     | -- | -- | IGR     | SNP | 0.154 | 22 | 4  |
| --          | chr12 | 115833238 | A   | C     | -- | -- | IGR     | SNP | 0.152 | 28 | 5  |
| --          | chr12 | 116205959 | A   | G     | -- | -- | IGR     | SNP | 0.372 | 27 | 16 |
| MED13L      | chr12 | 116708877 | G   | A     | -- | -- | Intron  | SNP | 0.200 | 16 | 4  |
| --          | chr12 | 117050175 | C   | G     | -- | -- | IGR     | SNP | 0.435 | 13 | 10 |
| --          | chr12 | 117114695 | GAC | -     | -- | -- | IGR     | DEL | 0.111 | 40 | 5  |
| FBXW8       | chr12 | 117376967 | C   | A     | -- | -- | Intron  | SNP | 0.600 | 20 | 30 |



|             |       |           |     |    |                        |        |        |       |       |    |    |
|-------------|-------|-----------|-----|----|------------------------|--------|--------|-------|-------|----|----|
| --          | chr12 | 117809536 | G   | T  | --                     | --     | IGR    | SNP   | 0.327 | 35 | 17 |
| KSR2        | chr12 | 117976580 | G   | T  | --                     | --     | Intron | SNP   | 0.290 | 22 | 9  |
| KSR2        | chr12 | 118054671 | C   | T  | --                     | --     | Intron | SNP   | 0.702 | 14 | 33 |
| --          | chr12 | 118433822 | C   | A  | --                     | --     | IGR    | SNP   | 0.174 | 19 | 4  |
| --          | chr12 | 119029061 | A   | T  | --                     | --     | IGR    | SNP   | 0.333 | 30 | 15 |
| --          | chr12 | 119053169 | A   | G  | --                     | --     | IGR    | SNP   | 0.188 | 26 | 6  |
| SRRM4       | chr12 | 119546829 | -   | CG | --                     | --     | Intron | INS   | 0.188 | 13 | 3  |
| --          | chr12 | 119634882 | T   | G  | --                     | --     | IGR    | SNP   | 0.641 | 14 | 25 |
| CCDC60      | chr12 | 119917690 | G   | A  | --                     | --     | Intron | SNP   | 0.609 | 18 | 28 |
| CIT         | chr12 | 120171348 | A   | C  | --                     | --     | Intron | SNP   | 0.200 | 32 | 8  |
| CCDC64      | chr12 | 120445227 | C   | G  | --                     | --     | Intron | SNP   | 0.540 | 29 | 34 |
| --          | chr12 | 120738058 | TG  | -  | --                     | --     | IGR    | DEL   | 0.231 | 30 | 9  |
| RNF10       | chr12 | 120979256 | G   | T  | --                     | --     | Intron | SNP   | 0.200 | 16 | 4  |
| CABP1       | chr12 | 121097049 | C   | A  | --                     | --     | Intron | SNP   | 0.536 | 32 | 37 |
| SPPL3       | chr12 | 121249925 | T   | A  | --                     | --     | Intron | SNP   | 0.379 | 18 | 11 |
| SPPL3       | chr12 | 121276688 | C   | T  | --                     | --     | Intron | SNP   | 0.162 | 31 | 6  |
| SPPL3       | chr12 | 121276714 | G   | A  | --                     | --     | Intron | SNP   | 0.143 | 36 | 6  |
| SPPL3       | chr12 | 121276879 | C   | T  | --                     | --     | Intron | SNP   | 0.222 | 14 | 4  |
| SPPL3       | chr12 | 121314334 | G   | A  | --                     | --     | Intron | SNP   | 0.286 | 20 | 8  |
| --          | chr12 | 121483348 | TTC | -  | --                     | --     | IGR    | DEL   | 0.143 | 42 | 7  |
| --          | chr12 | 121832094 | G   | A  | --                     | --     | IGR    | SNP   | 0.341 | 29 | 15 |
| KDM2B       | chr12 | 121914098 | C   | A  | --                     | --     | Intron | SNP   | 0.118 | 30 | 4  |
| PSMD9       | chr12 | 122352451 | C   | T  | --                     | --     | Intron | SNP   | 0.133 | 39 | 6  |
| CLIP1       | chr12 | 122812889 | G   | C  | C2919G,C281V973V,V938V | Silent | SNP    | 0.275 | 37    | 14 |    |
| CLIP1       | chr12 | 122841796 | T   | C  | --                     | --     | Intron | SNP   | 0.188 | 13 | 3  |
| KNTC1       | chr12 | 123047028 | A   | G  | --                     | --     | Intron | SNP   | 0.207 | 23 | 6  |
| --          | chr12 | 123139203 | C   | A  | --                     | --     | IGR    | SNP   | 0.235 | 13 | 4  |
| --          | chr12 | 123155075 | G   | A  | --                     | --     | IGR    | SNP   | 0.261 | 17 | 6  |
| --          | chr12 | 123162363 | C   | A  | --                     | --     | IGR    | SNP   | 0.472 | 28 | 25 |
| SBNO1       | chr12 | 123774727 | G   | T  | --                     | --     | 3'UTR  | SNP   | 0.735 | 9  | 25 |
| SBNO1       | chr12 | 123788128 | G   | C  | --                     | --     | Intron | SNP   | 0.136 | 38 | 6  |
| SETD8       | chr12 | 123887326 | C   | T  | --                     | --     | Intron | SNP   | 0.652 | 24 | 45 |
| SNRNP35     | chr12 | 123944241 | A   | T  | --                     | --     | Intron | SNP   | 0.200 | 36 | 9  |
| --          | chr12 | 124049064 | C   | T  | --                     | --     | IGR    | SNP   | 0.400 | 9  | 6  |
| --          | chr12 | 124058586 | C   | T  | --                     | --     | IGR    | SNP   | 0.508 | 32 | 33 |
| --          | chr12 | 124058643 | C   | T  | --                     | --     | IGR    | SNP   | 0.536 | 39 | 45 |
| --          | chr12 | 124058776 | C   | A  | --                     | --     | IGR    | SNP   | 0.458 | 32 | 27 |
| --          | chr12 | 124060006 | C   | T  | --                     | --     | IGR    | SNP   | 0.569 | 28 | 37 |
| --          | chr12 | 124060028 | C   | A  | --                     | --     | IGR    | SNP   | 0.492 | 33 | 32 |
| DNAH10      | chr12 | 124338160 | A   | T  | --                     | --     | Intron | SNP   | 0.342 | 25 | 13 |
| ZNF664-FAM1 | chr12 | 124710231 | C   | G  | --                     | --     | Intron | SNP   | 0.245 | 37 | 12 |
| ZNF664-FAM1 | chr12 | 124761051 | -   | AT | --                     | --     | Intron | INS   | 0.116 | 38 | 5  |
| --          | chr12 | 125419292 | -   | TG | --                     | --     | IGR    | INS   | 0.118 | 15 | 2  |
| DHX37       | chr12 | 125461420 | C   | A  | --                     | --     | Intron | SNP   | 0.182 | 18 | 4  |
| --          | chr12 | 125662119 | C   | T  | --                     | --     | IGR    | SNP   | 0.561 | 25 | 32 |
| --          | chr12 | 125688722 | A   | G  | --                     | --     | IGR    | SNP   | 0.130 | 47 | 7  |
| --          | chr12 | 125700122 | C   | G  | --                     | --     | IGR    | SNP   | 0.564 | 17 | 22 |
| --          | chr12 | 125738153 | -   | GT | --                     | --     | IGR    | INS   | 0.278 | 39 | 15 |
| --          | chr12 | 125738180 | A   | G  | --                     | --     | IGR    | SNP   | 0.260 | 37 | 13 |
| TMEM132B    | chr12 | 125977379 | C   | A  | --                     | --     | Intron | SNP   | 0.174 | 38 | 8  |
| TMEM132B    | chr12 | 125989742 | C   | A  | --                     | --     | Intron | SNP   | 0.200 | 16 | 4  |
| TMEM132B    | chr12 | 126012143 | T   | C  | --                     | --     | Intron | SNP   | 0.229 | 27 | 8  |
| TMEM132B    | chr12 | 126059313 | A   | T  | --                     | --     | Intron | SNP   | 0.765 | 8  | 26 |
| TMEM132B    | chr12 | 126071742 | C   | A  | --                     | --     | Intron | SNP   | 0.235 | 13 | 4  |
| TMEM132B    | chr12 | 126095164 | ATC | -  | --                     | --     | Intron | DEL   | 0.189 | 30 | 7  |
| --          | chr12 | 126363688 | A   | G  | --                     | --     | IGR    | SNP   | 0.707 | 12 | 29 |
| --          | chr12 | 126391129 | C   | T  | --                     | --     | IGR    | SNP   | 0.280 | 18 | 7  |
| --          | chr12 | 126612611 | G   | A  | --                     | --     | IGR    | SNP   | 0.433 | 17 | 13 |
| --          | chr12 | 126662840 | T   | G  | --                     | --     | IGR    | SNP   | 0.280 | 18 | 7  |
| --          | chr12 | 126690207 | G   | A  | --                     | --     | IGR    | SNP   | 0.545 | 25 | 30 |
| --          | chr12 | 126747341 | C   | G  | --                     | --     | IGR    | SNP   | 0.366 | 26 | 15 |
| --          | chr12 | 126797490 | A   | T  | --                     | --     | IGR    | SNP   | 0.583 | 10 | 14 |
| --          | chr12 | 126922973 | G   | T  | --                     | --     | IGR    | SNP   | 0.547 | 24 | 29 |
| --          | chr12 | 127017645 | C   | A  | --                     | --     | IGR    | SNP   | 0.243 | 28 | 9  |
| --          | chr12 | 127086931 | G   | C  | --                     | --     | IGR    | SNP   | 0.229 | 27 | 8  |
| --          | chr12 | 127405267 | G   | A  | --                     | --     | IGR    | SNP   | 0.357 | 9  | 5  |
| --          | chr12 | 127494862 | C   | A  | --                     | --     | IGR    | SNP   | 0.600 | 10 | 15 |
| --          | chr12 | 127609990 | A   | G  | --                     | --     | IGR    | SNP   | 0.222 | 14 | 4  |
| --          | chr12 | 127707756 | A   | T  | --                     | --     | IGR    | SNP   | 0.667 | 17 | 34 |
| --          | chr12 | 127738204 | C   | G  | --                     | --     | IGR    | SNP   | 0.667 | 10 | 20 |
| --          | chr12 | 127882728 | C   | G  | --                     | --     | IGR    | SNP   | 0.673 | 16 | 33 |
| --          | chr12 | 127903236 | G   | A  | --                     | --     | IGR    | SNP   | 0.129 | 61 | 9  |
| --          | chr12 | 128036869 | G   | A  | --                     | --     | IGR    | SNP   | 0.289 | 27 | 11 |
| --          | chr12 | 128065103 | A   | T  | --                     | --     | IGR    | SNP   | 0.268 | 41 | 15 |
| --          | chr12 | 128326048 | A   | C  | --                     | --     | IGR    | SNP   | 0.308 | 9  | 4  |
| --          | chr12 | 128326071 | A   | T  | --                     | --     | IGR    | SNP   | 0.200 | 16 | 4  |
| --          | chr12 | 128526954 | C   | T  | --                     | --     | IGR    | SNP   | 0.125 | 35 | 5  |
| TMEM132C    | chr12 | 128937270 | C   | A  | --                     | --     | Intron | SNP   | 0.333 | 18 | 9  |
| TMEM132C    | chr12 | 129024126 | G   | A  | --                     | --     | Intron | SNP   | 0.143 | 24 | 4  |
| TMEM132C    | chr12 | 129120781 | A   | G  | --                     | --     | Intron | SNP   | 0.325 | 27 | 13 |

|                   |       |           |     |       |    |    |        |     |       |    |    |
|-------------------|-------|-----------|-----|-------|----|----|--------|-----|-------|----|----|
| --                | chr12 | 129330207 | GC  | -     | -- | -- | IGR    | DEL | 0.167 | 35 | 7  |
| --                | chr12 | 129527215 | C   | A     | -- | -- | IGR    | SNP | 0.160 | 21 | 4  |
| <i>TMEM132D</i>   | chr12 | 129872513 | G   | T     | -- | -- | Intron | SNP | 0.316 | 13 | 6  |
| <i>TMEM132D</i>   | chr12 | 129872519 | T   | C     | -- | -- | Intron | SNP | 0.333 | 12 | 6  |
| <i>TMEM132D</i>   | chr12 | 129950845 | T   | C     | -- | -- | Intron | SNP | 0.571 | 3  | 4  |
| <i>TMEM132D</i>   | chr12 | 130116847 | C   | G     | -- | -- | Intron | SNP | 0.273 | 24 | 9  |
| <i>TMEM132D</i>   | chr12 | 130309728 | TA  | -     | -- | -- | Intron | DEL | 0.103 | 26 | 3  |
| <i>TMEM132D</i>   | chr12 | 130346994 | C   | G     | -- | -- | Intron | SNP | 0.491 | 27 | 26 |
| <i>TMEM132D</i>   | chr12 | 130380529 | G   | T     | -- | -- | Intron | SNP | 0.208 | 19 | 5  |
| --                | chr12 | 130427327 | C   | T     | -- | -- | IGR    | SNP | 0.492 | 31 | 30 |
| --                | chr12 | 130433630 | C   | A     | -- | -- | IGR    | SNP | 0.189 | 30 | 7  |
| --                | chr12 | 130444664 | T   | C     | -- | -- | IGR    | SNP | 0.695 | 18 | 41 |
| --                | chr12 | 130614014 | G   | A     | -- | -- | IGR    | SNP | 0.305 | 41 | 18 |
| --                | chr12 | 130703972 | C   | A     | -- | -- | IGR    | SNP | 0.345 | 38 | 20 |
| --                | chr12 | 130709663 | C   | T     | -- | -- | IGR    | SNP | 0.182 | 45 | 10 |
| --                | chr12 | 130771492 | C   | T     | -- | -- | IGR    | SNP | 0.250 | 33 | 11 |
| <i>RIMBP2</i>     | chr12 | 130931936 | C   | A     | -- | -- | Intron | SNP | 0.145 | 65 | 11 |
| <i>RIMBP2</i>     | chr12 | 130943146 | G   | A     | -- | -- | Intron | SNP | 0.625 | 18 | 30 |
| <i>RIMBP2</i>     | chr12 | 131001808 | C   | T     | -- | -- | Intron | SNP | 0.347 | 32 | 17 |
| --                | chr12 | 131024194 | G   | C     | -- | -- | IGR    | SNP | 0.147 | 87 | 15 |
| --                | chr12 | 131024585 | C   | G     | -- | -- | IGR    | SNP | 0.214 | 44 | 12 |
| --                | chr12 | 131034186 | G   | A     | -- | -- | IGR    | SNP | 0.479 | 37 | 34 |
| --                | chr12 | 131851728 | G   | A     | -- | -- | IGR    | SNP | 0.600 | 2  | 3  |
| --                | chr12 | 131851729 | C   | T     | -- | -- | IGR    | SNP | 0.600 | 2  | 3  |
| --                | chr12 | 131932111 | A   | G     | -- | -- | IGR    | SNP | 0.100 | 45 | 5  |
| --                | chr12 | 132045384 | G   | A     | -- | -- | IGR    | SNP | 0.289 | 27 | 11 |
| --                | chr12 | 132112160 | C   | T     | -- | -- | IGR    | SNP | 0.173 | 43 | 9  |
| --                | chr12 | 132368797 | G   | A     | -- | -- | IGR    | SNP | 0.169 | 49 | 10 |
| <i>EP400</i>      | chr12 | 132441439 | A   | T     | -- | -- | Intron | SNP | 0.200 | 12 | 3  |
| <i>NOC4L</i>      | chr12 | 132634597 | G   | A     | -- | -- | Intron | SNP | 0.375 | 5  | 3  |
| <i>GALNT9</i>     | chr12 | 132815659 | C   | A     | -- | -- | Intron | SNP | 0.211 | 15 | 4  |
| --                | chr12 | 132913123 | A   | T     | -- | -- | IGR    | SNP | 0.189 | 30 | 7  |
| <i>POLE</i>       | chr12 | 133261721 | CAG | -     | -- | -- | Intron | DEL | 0.175 | 47 | 10 |
| <i>PXMP2</i>      | chr12 | 133265287 | T   | G     | -- | -- | Intron | SNP | 0.389 | 11 | 7  |
| <i>PXMP2</i>      | chr12 | 133265326 | G   | T     | -- | -- | Intron | SNP | 0.200 | 12 | 3  |
| <i>PXMP2</i>      | chr12 | 133269741 | -   | TGCC  | -- | -- | Intron | INS | 0.200 | 12 | 3  |
| <i>PXMP2</i>      | chr12 | 133270439 | -   | TA    | -- | -- | Intron | INS | 0.125 | 14 | 2  |
| --                | chr12 | 133535714 | G   | T     | -- | -- | IGR    | SNP | 0.174 | 19 | 4  |
| --                | chr12 | 133746780 | C   | A     | -- | -- | IGR    | SNP | 0.714 | 2  | 5  |
| --                | chr12 | 133790554 | G   | A     | -- | -- | IGR    | SNP | 0.519 | 13 | 14 |
| --                | chr13 | 19076692  | C   | T     | -- | -- | IGR    | SNP | 0.100 | 36 | 4  |
| --                | chr13 | 19121671  | G   | A     | -- | -- | IGR    | SNP | 0.137 | 44 | 7  |
| --                | chr13 | 19132707  | G   | C     | -- | -- | IGR    | SNP | 0.324 | 23 | 11 |
| --                | chr13 | 19188955  | -   | AG    | -- | -- | IGR    | INS | 0.214 | 22 | 6  |
| --                | chr13 | 19199118  | -   | ACTTG | -- | -- | IGR    | INS | 0.150 | 34 | 6  |
| --                | chr13 | 19202849  | T   | C     | -- | -- | IGR    | SNP | 0.167 | 15 | 3  |
| --                | chr13 | 19202867  | T   | A     | -- | -- | IGR    | SNP | 0.143 | 18 | 3  |
| --                | chr13 | 19208093  | A   | G     | -- | -- | IGR    | SNP | 0.152 | 28 | 5  |
| --                | chr13 | 19265201  | A   | T     | -- | -- | IGR    | SNP | 0.111 | 24 | 3  |
| --                | chr13 | 19272214  | C   | T     | -- | -- | IGR    | SNP | 0.178 | 37 | 8  |
| --                | chr13 | 19272460  | T   | C     | -- | -- | IGR    | SNP | 0.116 | 38 | 5  |
| --                | chr13 | 19350262  | C   | A     | -- | -- | IGR    | SNP | 0.700 | 3  | 7  |
| --                | chr13 | 19357537  | G   | C     | -- | -- | IGR    | SNP | 0.267 | 11 | 4  |
| --                | chr13 | 19365277  | -   | GC    | -- | -- | IGR    | INS | 0.109 | 49 | 6  |
| <i>ANKRD20A9F</i> | chr13 | 19415348  | C   | A     | -- | -- | RNA    | SNP | 0.111 | 32 | 4  |
| <i>ANKRD20A9F</i> | chr13 | 19418462  | A   | G     | -- | -- | RNA    | SNP | 0.156 | 27 | 5  |
| <i>ANKRD20A9F</i> | chr13 | 19418677  | T   | A     | -- | -- | RNA    | SNP | 0.333 | 8  | 4  |
| <i>ANKRD20A9F</i> | chr13 | 19423379  | A   | G     | -- | -- | RNA    | SNP | 0.189 | 30 | 7  |
| <i>ANKRD20A9F</i> | chr13 | 19427246  | G   | A     | -- | -- | RNA    | SNP | 0.188 | 26 | 6  |
| <i>ANKRD20A9F</i> | chr13 | 19427262  | C   | A     | -- | -- | RNA    | SNP | 0.194 | 25 | 6  |
| <i>ANKRD20A9F</i> | chr13 | 19427425  | A   | G     | -- | -- | RNA    | SNP | 0.109 | 49 | 6  |
| <i>TUBA3C</i>     | chr13 | 19754647  | A   | T     | -- | -- | Intron | SNP | 0.875 | 3  | 21 |
| <i>ANKRD26P3</i>  | chr13 | 19885989  | G   | C     | -- | -- | RNA    | SNP | 0.839 | 5  | 26 |
| --                | chr13 | 19953880  | C   | T     | -- | -- | IGR    | SNP | 0.357 | 27 | 15 |
| <i>TPTE2</i>      | chr13 | 20009984  | C   | T     | -- | -- | Intron | SNP | 0.111 | 40 | 5  |
| <i>TPTE2</i>      | chr13 | 20012587  | A   | G     | -- | -- | Intron | SNP | 0.200 | 32 | 8  |
| <i>TPTE2</i>      | chr13 | 20018177  | A   | G     | -- | -- | Intron | SNP | 0.171 | 29 | 6  |
| <i>TPTE2</i>      | chr13 | 20025233  | G   | A     | -- | -- | Intron | SNP | 0.125 | 35 | 5  |
| <i>TPTE2</i>      | chr13 | 20059627  | -   | CT    | -- | -- | Intron | INS | 0.147 | 29 | 5  |
| <i>TPTE2</i>      | chr13 | 20059649  | -   | TATA  | -- | -- | Intron | INS | 0.147 | 29 | 5  |
| <i>TPTE2</i>      | chr13 | 20088198  | G   | T     | -- | -- | Intron | SNP | 0.111 | 40 | 5  |
| --                | chr13 | 20143538  | C   | A     | -- | -- | IGR    | SNP | 0.143 | 36 | 6  |
| <i>ZMYM2</i>      | chr13 | 20565256  | C   | T     | -- | -- | Intron | SNP | 0.138 | 25 | 4  |
| <i>ZMYM2</i>      | chr13 | 20629774  | G   | A     | -- | -- | Intron | SNP | 0.891 | 6  | 49 |
| <i>GJA3</i>       | chr13 | 20721732  | G   | A     | -- | -- | Intron | SNP | 0.836 | 9  | 46 |
| <i>GJA3</i>       | chr13 | 20722008  | G   | A     | -- | -- | Intron | SNP | 0.857 | 8  | 48 |
| <i>GJA3</i>       | chr13 | 20722636  | G   | T     | -- | -- | Intron | SNP | 0.925 | 3  | 37 |
| --                | chr13 | 20770962  | A   | G     | -- | -- | IGR    | SNP | 0.259 | 20 | 7  |
| --                | chr13 | 20956633  | -   | CG    | -- | -- | IGR    | INS | 0.559 | 15 | 19 |
| --                | chr13 | 21106430  | G   | A     | -- | -- | IGR    | SNP | 0.138 | 25 | 4  |

|                   |       |          |      |      |    |    |         |     |       |    |    |
|-------------------|-------|----------|------|------|----|----|---------|-----|-------|----|----|
| <i>IFT88</i>      | chr13 | 21216202 | A    | T    | -- | -- | Intron  | SNP | 0.957 | 2  | 44 |
| --                | chr13 | 21300467 | G    | A    | -- | -- | IGR     | SNP | 0.700 | 12 | 28 |
| --                | chr13 | 21531565 | C    | T    | -- | -- | IGR     | SNP | 0.840 | 4  | 21 |
| <i>LATS2</i>      | chr13 | 21547377 | A    | T    | -- | -- | 3'UTR   | SNP | 0.238 | 32 | 10 |
| <i>LATS2</i>      | chr13 | 21569325 | G    | T    | -- | -- | Intron  | SNP | 0.429 | 24 | 18 |
| --                | chr13 | 21780569 | C    | T    | -- | -- | IGR     | SNP | 0.163 | 36 | 7  |
| --                | chr13 | 21836891 | TAAG | -    | -- | -- | IGR     | DEL | 0.146 | 35 | 6  |
| <i>LOC650794</i>  | chr13 | 21873365 | A    | G    | -- | -- | RNA     | SNP | 0.109 | 41 | 5  |
| <i>LOC650794</i>  | chr13 | 21873370 | -    | AG   | -- | -- | RNA     | INS | 0.116 | 38 | 5  |
| --                | chr13 | 21922581 | G    | C    | -- | -- | IGR     | SNP | 0.854 | 7  | 41 |
| --                | chr13 | 21922773 | G    | C    | -- | -- | IGR     | SNP | 0.882 | 4  | 30 |
| --                | chr13 | 21923260 | C    | G    | -- | -- | IGR     | SNP | 0.583 | 20 | 28 |
| --                | chr13 | 21925976 | G    | C    | -- | -- | IGR     | SNP | 0.935 | 3  | 43 |
| --                | chr13 | 22394698 | G    | T    | -- | -- | IGR     | SNP | 0.178 | 37 | 8  |
| --                | chr13 | 23015193 | G    | A    | -- | -- | IGR     | SNP | 0.172 | 24 | 5  |
| --                | chr13 | 23392420 | C    | T    | -- | -- | IGR     | SNP | 0.250 | 27 | 9  |
| <i>SGCG</i>       | chr13 | 23882295 | G    | A    | -- | -- | Intron  | SNP | 0.682 | 7  | 15 |
| <i>SGCG</i>       | chr13 | 23882311 | G    | A    | -- | -- | Intron  | SNP | 0.722 | 5  | 13 |
| <i>TNFRSF19</i>   | chr13 | 24220754 | T    | C    | -- | -- | Intron  | SNP | 0.903 | 3  | 28 |
| <i>SPATA13</i>    | chr13 | 24813858 | T    | A    | -- | -- | Intron  | SNP | 0.286 | 10 | 4  |
| --                | chr13 | 25153272 | G    | A    | -- | -- | IGR     | SNP | 0.364 | 21 | 12 |
| <i>TPTE2P6</i>    | chr13 | 25172399 | A    | T    | -- | -- | 3'Flank | SNP | 0.100 | 45 | 5  |
| <i>ATP12A</i>     | chr13 | 25283023 | AAG  | -    | -- | -- | Intron  | DEL | 0.120 | 22 | 3  |
| <i>TPTE2P1</i>    | chr13 | 25529384 | A    | C    | -- | -- | RNA     | SNP | 0.161 | 26 | 5  |
| <i>TPTE2P1</i>    | chr13 | 25535647 | G    | A    | -- | -- | RNA     | SNP | 0.393 | 17 | 11 |
| --                | chr13 | 25872517 | G    | A    | -- | -- | IGR     | SNP | 0.932 | 4  | 55 |
| <i>ATP8A2</i>     | chr13 | 25997198 | G    | C    | -- | -- | Intron  | SNP | 0.275 | 29 | 11 |
| <i>ATP8A2</i>     | chr13 | 26311996 | G    | C    | -- | -- | Intron  | SNP | 0.267 | 22 | 8  |
| <i>CDK8</i>       | chr13 | 26924043 | A    | T    | -- | -- | Intron  | SNP | 0.163 | 36 | 7  |
| --                | chr13 | 27046894 | C    | T    | -- | -- | IGR     | SNP | 0.143 | 24 | 4  |
| --                | chr13 | 27120580 | T    | C    | -- | -- | IGR     | SNP | 0.375 | 20 | 12 |
| --                | chr13 | 27481217 | C    | T    | -- | -- | IGR     | SNP | 0.250 | 12 | 4  |
| --                | chr13 | 27636775 | C    | T    | -- | -- | IGR     | SNP | 0.194 | 25 | 6  |
| --                | chr13 | 27885507 | A    | T    | -- | -- | IGR     | SNP | 0.250 | 30 | 10 |
| <i>LNX2</i>       | chr13 | 28141081 | C    | T    | -- | -- | Intron  | SNP | 0.104 | 43 | 5  |
| --                | chr13 | 28264554 | C    | T    | -- | -- | IGR     | SNP | 0.314 | 24 | 11 |
| --                | chr13 | 29464615 | C    | A    | -- | -- | IGR     | SNP | 0.289 | 32 | 13 |
| --                | chr13 | 29465512 | T    | A    | -- | -- | IGR     | SNP | 0.378 | 28 | 17 |
| <i>MTUS2</i>      | chr13 | 29700571 | T    | A    | -- | -- | Intron  | SNP | 0.170 | 44 | 9  |
| <i>MTUS2</i>      | chr13 | 29732357 | G    | A    | -- | -- | Intron  | SNP | 0.917 | 1  | 11 |
| <i>MTUS2</i>      | chr13 | 29772272 | GT   | -    | -- | -- | Intron  | DEL | 0.105 | 17 | 2  |
| --                | chr13 | 30209127 | G    | T    | -- | -- | IGR     | SNP | 0.111 | 24 | 3  |
| <i>LINC00426</i>  | chr13 | 30941587 | G    | A    | -- | -- | RNA     | SNP | 0.932 | 3  | 41 |
| --                | chr13 | 31122891 | C    | A    | -- | -- | IGR     | SNP | 0.255 | 41 | 14 |
| --                | chr13 | 31122892 | T    | C    | -- | -- | IGR     | SNP | 0.255 | 41 | 14 |
| <i>USPL1</i>      | chr13 | 31202204 | G    | T    | -- | -- | Intron  | SNP | 0.286 | 10 | 4  |
| --                | chr13 | 31758421 | C    | A    | -- | -- | IGR     | SNP | 0.236 | 42 | 13 |
| --                | chr13 | 32003114 | C    | A    | -- | -- | IGR     | SNP | 0.297 | 26 | 11 |
| --                | chr13 | 32035421 | C    | T    | -- | -- | IGR     | SNP | 0.250 | 12 | 4  |
| --                | chr13 | 32407679 | C    | A    | -- | -- | IGR     | SNP | 0.459 | 20 | 17 |
| <i>EEF1DP3</i>    | chr13 | 32429082 | G    | C    | -- | -- | RNA     | SNP | 0.263 | 28 | 10 |
| <i>FRY</i>        | chr13 | 32859951 | A    | G    | -- | -- | Intron  | SNP | 0.868 | 7  | 46 |
| <i>N4BP2L2</i>    | chr13 | 33066411 | T    | A    | -- | -- | Intron  | SNP | 0.194 | 25 | 6  |
| <i>PDS5B</i>      | chr13 | 33230431 | C    | T    | -- | -- | Intron  | SNP | 0.107 | 25 | 3  |
| <i>STARD13</i>    | chr13 | 34039361 | G    | T    | -- | -- | Intron  | SNP | 0.182 | 18 | 4  |
| <i>STARD13</i>    | chr13 | 34101825 | T    | C    | -- | -- | Intron  | SNP | 0.938 | 1  | 15 |
| --                | chr13 | 34658672 | G    | C    | -- | -- | IGR     | SNP | 0.912 | 3  | 31 |
| --                | chr13 | 34772879 | G    | T    | -- | -- | IGR     | SNP | 0.314 | 35 | 16 |
| --                | chr13 | 34868577 | G    | A    | -- | -- | IGR     | SNP | 0.148 | 23 | 4  |
| --                | chr13 | 35288879 | A    | G    | -- | -- | IGR     | SNP | 0.966 | 1  | 28 |
| --                | chr13 | 35348743 | A    | C    | -- | -- | IGR     | SNP | 0.250 | 21 | 7  |
| <i>NBEA</i>       | chr13 | 35996531 | C    | T    | -- | -- | Intron  | SNP | 0.818 | 2  | 9  |
| <i>DCLK1</i>      | chr13 | 36614229 | A    | G    | -- | -- | Intron  | SNP | 0.600 | 12 | 18 |
| --                | chr13 | 36710385 | G    | C    | -- | -- | IGR     | SNP | 0.871 | 4  | 27 |
| --                | chr13 | 36733796 | -    | AG   | -- | -- | IGR     | INS | 0.519 | 13 | 14 |
| <i>CCDC169-SO</i> | chr13 | 36775671 | A    | T    | -- | -- | Intron  | SNP | 0.167 | 20 | 4  |
| --                | chr13 | 37339040 | A    | G    | -- | -- | IGR     | SNP | 0.628 | 16 | 27 |
| --                | chr13 | 37760112 | C    | A    | -- | -- | IGR     | SNP | 0.667 | 2  | 4  |
| --                | chr13 | 37988416 | -    | TTTA | -- | -- | IGR     | INS | 0.222 | 14 | 4  |
| --                | chr13 | 38022889 | AC   | -    | -- | -- | IGR     | DEL | 0.194 | 25 | 6  |
| <i>TRPC4</i>      | chr13 | 38356856 | G    | C    | -- | -- | Intron  | SNP | 0.217 | 18 | 5  |
| <i>TRPC4</i>      | chr13 | 38356857 | C    | T    | -- | -- | Intron  | SNP | 0.217 | 18 | 5  |
| --                | chr13 | 38513862 | C    | A    | -- | -- | IGR     | SNP | 1.000 | 0  | 31 |
| --                | chr13 | 38685142 | T    | G    | -- | -- | IGR     | SNP | 0.904 | 5  | 47 |
| --                | chr13 | 38782774 | G    | C    | -- | -- | IGR     | SNP | 0.897 | 4  | 35 |
| <i>FREM2</i>      | chr13 | 39404195 | G    | A    | -- | -- | Intron  | SNP | 0.140 | 43 | 7  |
| --                | chr13 | 39831495 | C    | A    | -- | -- | IGR     | SNP | 0.962 | 2  | 50 |
| --                | chr13 | 39874598 | A    | G    | -- | -- | IGR     | SNP | 0.953 | 2  | 41 |
| <i>LHFP</i>       | chr13 | 40017391 | C    | A    | -- | -- | Intron  | SNP | 0.262 | 31 | 11 |
| --                | chr13 | 40981698 | TG   | -    | -- | -- | IGR     | DEL | 0.150 | 17 | 3  |

|           |       |          |            |      |    |    |         |     |       |    |    |
|-----------|-------|----------|------------|------|----|----|---------|-----|-------|----|----|
| --        | chr13 | 41751892 | C          | G    | -- | -- | IGR     | SNP | 0.952 | 2  | 40 |
| --        | chr13 | 42125478 | G          | C    | -- | -- | IGR     | SNP | 0.921 | 5  | 58 |
| KIAA0564  | chr13 | 42184930 | G          | A    | -- | -- | Intron  | SNP | 0.882 | 4  | 30 |
| KIAA0564  | chr13 | 42185526 | G          | C    | -- | -- | Intron  | SNP | 0.821 | 10 | 46 |
| KIAA0564  | chr13 | 42419048 | C          | T    | -- | -- | Intron  | SNP | 0.875 | 6  | 42 |
| EPST11    | chr13 | 43527605 | C          | A    | -- | -- | Intron  | SNP | 0.256 | 29 | 10 |
| --        | chr13 | 43573865 | C          | T    | -- | -- | IGR     | SNP | 0.140 | 43 | 7  |
| DNAJC15   | chr13 | 43650923 | C          | T    | -- | -- | Intron  | SNP | 0.897 | 4  | 35 |
| ENOX1     | chr13 | 44105610 | T          | C    | -- | -- | Intron  | SNP | 0.750 | 2  | 6  |
| ENOX1     | chr13 | 44281040 | GAT        | -    | -- | -- | Intron  | DEL | 0.120 | 22 | 3  |
| TSC22D1   | chr13 | 45031772 | G          | A    | -- | -- | Intron  | SNP | 0.200 | 16 | 4  |
| GTF2F2    | chr13 | 45777394 | A          | T    | -- | -- | Intron  | SNP | 0.333 | 10 | 5  |
| SLC25A30  | chr13 | 45968395 | A          | C    | -- | -- | 3'UTR   | SNP | 0.273 | 8  | 3  |
| --        | chr13 | 46033851 | C          | T    | -- | -- | IGR     | SNP | 0.102 | 44 | 5  |
| --        | chr13 | 46342120 | T          | G    | -- | -- | IGR     | SNP | 0.381 | 13 | 8  |
| CPB2      | chr13 | 46661307 | G          | T    | -- | -- | Intron  | SNP | 0.304 | 32 | 14 |
| CPB2      | chr13 | 46670011 | C          | T    | -- | -- | Intron  | SNP | 0.300 | 7  | 3  |
| KIAA0226L | chr13 | 46926822 | C          | T    | -- | -- | Intron  | SNP | 0.163 | 36 | 7  |
| ESD       | chr13 | 47354483 | G          | A    | -- | -- | Intron  | SNP | 0.917 | 3  | 33 |
| HTR2A     | chr13 | 47433429 | C          | T    | -- | -- | Intron  | SNP | 0.286 | 35 | 14 |
| --        | chr13 | 47564368 | C          | A    | -- | -- | IGR     | SNP | 0.579 | 24 | 33 |
| --        | chr13 | 47571813 | C          | A    | -- | -- | IGR     | SNP | 0.877 | 7  | 50 |
| --        | chr13 | 47571814 | A          | G    | -- | -- | IGR     | SNP | 0.879 | 7  | 51 |
| --        | chr13 | 47602778 | G          | A    | -- | -- | IGR     | SNP | 0.143 | 24 | 4  |
| --        | chr13 | 48096346 | AG         | -    | -- | -- | IGR     | DEL | 0.921 | 3  | 35 |
| --        | chr13 | 48125084 | C          | T    | -- | -- | IGR     | SNP | 0.200 | 16 | 4  |
| --        | chr13 | 48334368 | C          | T    | -- | -- | IGR     | SNP | 0.300 | 28 | 12 |
| MED4      | chr13 | 48668531 | C          | A    | -- | -- | Intron  | SNP | 0.118 | 45 | 6  |
| MED4      | chr13 | 48668536 | C          | A    | -- | -- | Intron  | SNP | 0.106 | 42 | 5  |
| --        | chr13 | 48704924 | A          | T    | -- | -- | IGR     | SNP | 0.132 | 46 | 7  |
| RB1       | chr13 | 48909947 | G          | A    | -- | -- | Intron  | SNP | 0.227 | 34 | 10 |
| --        | chr13 | 49251886 | C          | T    | -- | -- | IGR     | SNP | 0.308 | 27 | 12 |
| --        | chr13 | 49309816 | A          | T    | -- | -- | IGR     | SNP | 0.875 | 4  | 28 |
| FNDC3A    | chr13 | 49586480 | A          | C    | -- | -- | Intron  | SNP | 0.182 | 27 | 6  |
| CAB39L    | chr13 | 50014079 | C          | T    | -- | -- | Intron  | SNP | 0.278 | 13 | 5  |
| DLEU2     | chr13 | 50609698 | G          | C    | -- | -- | RNA     | SNP | 0.915 | 6  | 65 |
| --        | chr13 | 50759555 | TC         | -    | -- | -- | IGR     | DEL | 0.143 | 18 | 3  |
| --        | chr13 | 50956904 | CTG        | -    | -- | -- | IGR     | DEL | 0.105 | 34 | 4  |
| --        | chr13 | 50967064 | C          | T    | -- | -- | IGR     | SNP | 0.659 | 14 | 27 |
| DLEU7     | chr13 | 51309802 | A          | G    | -- | -- | Intron  | SNP | 0.425 | 23 | 17 |
| --        | chr13 | 51474282 | C          | A    | -- | -- | IGR     | SNP | 0.650 | 14 | 26 |
| RNASEH2B  | chr13 | 51489554 | C          | G    | -- | -- | Intron  | SNP | 0.889 | 6  | 48 |
| --        | chr13 | 51649296 | C          | T    | -- | -- | IGR     | SNP | 0.200 | 12 | 3  |
| --        | chr13 | 51652769 | -          | ACAT | -- | -- | IGR     | INS | 0.133 | 13 | 2  |
| --        | chr13 | 51876133 | C          | T    | -- | -- | IGR     | SNP | 0.227 | 58 | 17 |
| --        | chr13 | 52084830 | A          | T    | -- | -- | IGR     | SNP | 0.200 | 12 | 3  |
| --        | chr13 | 52107113 | TG         | -    | -- | -- | IGR     | DEL | 0.167 | 50 | 10 |
| WDFY2     | chr13 | 52231039 | G          | T    | -- | -- | Intron  | SNP | 0.912 | 3  | 31 |
| WDFY2     | chr13 | 52282108 | G          | T    | -- | -- | Intron  | SNP | 0.286 | 10 | 4  |
| NEK5      | chr13 | 52653891 | GC         | -    | -- | -- | Intron  | DEL | 0.118 | 15 | 2  |
| --        | chr13 | 53052111 | A          | T    | -- | -- | IGR     | SNP | 0.192 | 21 | 5  |
| --        | chr13 | 53355241 | -          | GA   | -- | -- | IGR     | INS | 0.760 | 12 | 38 |
| --        | chr13 | 53733601 | G          | C    | -- | -- | IGR     | SNP | 0.882 | 4  | 30 |
| --        | chr13 | 53927168 | G          | C    | -- | -- | IGR     | SNP | 0.188 | 13 | 3  |
| --        | chr13 | 54187975 | C          | A    | -- | -- | IGR     | SNP | 0.213 | 37 | 10 |
| --        | chr13 | 54625219 | T          | G    | -- | -- | IGR     | SNP | 0.536 | 13 | 15 |
| --        | chr13 | 54672084 | C          | A    | -- | -- | IGR     | SNP | 0.375 | 25 | 15 |
| --        | chr13 | 54708382 | C          | T    | -- | -- | IGR     | SNP | 0.256 | 32 | 11 |
| --        | chr13 | 54799228 | AAAGAG     | -    | -- | -- | IGR     | DEL | 0.111 | 16 | 2  |
| --        | chr13 | 54821880 | C          | G    | -- | -- | IGR     | SNP | 0.524 | 10 | 11 |
| --        | chr13 | 54842944 | T          | C    | -- | -- | IGR     | SNP | 0.150 | 34 | 6  |
| --        | chr13 | 54842945 | G          | A    | -- | -- | IGR     | SNP | 0.150 | 34 | 6  |
| MIR1297   | chr13 | 54885319 | T          | C    | -- | -- | 3'Flank | SNP | 0.848 | 5  | 28 |
| --        | chr13 | 55509773 | -          | GTA  | -- | -- | IGR     | INS | 0.476 | 10 | 10 |
| --        | chr13 | 55588523 | A          | C    | -- | -- | IGR     | SNP | 0.967 | 1  | 29 |
| --        | chr13 | 55694866 | G          | A    | -- | -- | IGR     | SNP | 0.900 | 3  | 27 |
| --        | chr13 | 56052137 | T          | G    | -- | -- | IGR     | SNP | 0.875 | 4  | 28 |
| --        | chr13 | 56130480 | C          | T    | -- | -- | IGR     | SNP | 0.176 | 14 | 3  |
| --        | chr13 | 56218148 | G          | T    | -- | -- | IGR     | SNP | 0.308 | 9  | 4  |
| --        | chr13 | 56230822 | T          | C    | -- | -- | IGR     | SNP | 0.174 | 19 | 4  |
| --        | chr13 | 56230842 | C          | G    | -- | -- | IGR     | SNP | 0.107 | 25 | 3  |
| --        | chr13 | 56232069 | AAGTGTCTC- | -    | -- | -- | IGR     | DEL | 0.130 | 20 | 3  |
| --        | chr13 | 56364042 | CTT        | -    | -- | -- | IGR     | DEL | 0.152 | 28 | 5  |
| --        | chr13 | 56386688 | A          | G    | -- | -- | IGR     | SNP | 0.294 | 12 | 5  |
| --        | chr13 | 56388474 | A          | C    | -- | -- | IGR     | SNP | 0.609 | 9  | 14 |
| --        | chr13 | 56616105 | C          | T    | -- | -- | IGR     | SNP | 0.345 | 19 | 10 |
| --        | chr13 | 56640453 | G          | A    | -- | -- | IGR     | SNP | 0.733 | 4  | 11 |
| --        | chr13 | 56704818 | -          | TTA  | -- | -- | IGR     | INS | 0.882 | 2  | 15 |
| --        | chr13 | 56762663 | G          | T    | -- | -- | IGR     | SNP | 0.447 | 26 | 21 |
| --        | chr13 | 56823975 | C          | G    | -- | -- | IGR     | SNP | 0.909 | 2  | 20 |

|               |       |          |     |    |    |    |        |     |       |    |    |
|---------------|-------|----------|-----|----|----|----|--------|-----|-------|----|----|
| --            | chr13 | 56972616 | A   | G  | -- | -- | IGR    | SNP | 0.269 | 19 | 7  |
| --            | chr13 | 57096699 | G   | T  | -- | -- | IGR    | SNP | 0.174 | 19 | 4  |
| --            | chr13 | 57113691 | A   | G  | -- | -- | IGR    | SNP | 0.310 | 29 | 13 |
| --            | chr13 | 57149477 | C   | T  | -- | -- | IGR    | SNP | 0.154 | 33 | 6  |
| --            | chr13 | 57293319 | C   | A  | -- | -- | IGR    | SNP | 0.111 | 32 | 4  |
| --            | chr13 | 57427780 | T   | C  | -- | -- | IGR    | SNP | 0.952 | 1  | 20 |
| --            | chr13 | 57701659 | C   | A  | -- | -- | IGR    | SNP | 0.813 | 9  | 39 |
| --            | chr13 | 57888324 | G   | T  | -- | -- | IGR    | SNP | 0.308 | 9  | 4  |
| --            | chr13 | 58054110 | G   | T  | -- | -- | IGR    | SNP | 0.408 | 29 | 20 |
| --            | chr13 | 58102348 | G   | A  | -- | -- | IGR    | SNP | 0.759 | 7  | 22 |
| <i>PCDH17</i> | chr13 | 58254218 | G   | T  | -- | -- | Intron | SNP | 0.269 | 19 | 7  |
| <i>PCDH17</i> | chr13 | 58258660 | T   | G  | -- | -- | Intron | SNP | 0.611 | 14 | 22 |
| --            | chr13 | 58640689 | G   | A  | -- | -- | IGR    | SNP | 0.848 | 5  | 28 |
| --            | chr13 | 58645239 | G   | T  | -- | -- | IGR    | SNP | 0.231 | 10 | 3  |
| --            | chr13 | 58789086 | A   | G  | -- | -- | IGR    | SNP | 0.200 | 24 | 6  |
| --            | chr13 | 58975212 | G   | T  | -- | -- | IGR    | SNP | 0.853 | 5  | 29 |
| --            | chr13 | 58997529 | G   | T  | -- | -- | IGR    | SNP | 1.000 | 0  | 23 |
| --            | chr13 | 59187648 | T   | G  | -- | -- | IGR    | SNP | 0.857 | 4  | 24 |
| --            | chr13 | 59281582 | T   | C  | -- | -- | IGR    | SNP | 0.929 | 3  | 39 |
| --            | chr13 | 59312952 | C   | T  | -- | -- | IGR    | SNP | 0.509 | 28 | 29 |
| --            | chr13 | 59781958 | T   | C  | -- | -- | IGR    | SNP | 0.185 | 22 | 5  |
| --            | chr13 | 59955168 | T   | G  | -- | -- | IGR    | SNP | 0.308 | 9  | 4  |
| --            | chr13 | 59956446 | G   | A  | -- | -- | IGR    | SNP | 0.944 | 3  | 51 |
| --            | chr13 | 59974645 | G   | A  | -- | -- | IGR    | SNP | 0.190 | 17 | 4  |
| --            | chr13 | 59980723 | C   | A  | -- | -- | IGR    | SNP | 0.174 | 19 | 4  |
| <i>DIAPH3</i> | chr13 | 60506294 | T   | G  | -- | -- | Intron | SNP | 0.444 | 25 | 20 |
| --            | chr13 | 60895817 | G   | T  | -- | -- | IGR    | SNP | 0.267 | 11 | 4  |
| --            | chr13 | 61339579 | A   | T  | -- | -- | IGR    | SNP | 0.349 | 28 | 15 |
| --            | chr13 | 61558547 | C   | T  | -- | -- | IGR    | SNP | 0.950 | 2  | 38 |
| --            | chr13 | 61741430 | G   | T  | -- | -- | IGR    | SNP | 0.938 | 2  | 30 |
| --            | chr13 | 61944940 | A   | T  | -- | -- | IGR    | SNP | 0.280 | 18 | 7  |
| --            | chr13 | 62025444 | C   | G  | -- | -- | IGR    | SNP | 0.935 | 2  | 29 |
| --            | chr13 | 62224822 | T   | C  | -- | -- | IGR    | SNP | 0.179 | 32 | 7  |
| --            | chr13 | 62554769 | A   | T  | -- | -- | IGR    | SNP | 0.893 | 3  | 25 |
| --            | chr13 | 62742114 | G   | A  | -- | -- | IGR    | SNP | 0.596 | 23 | 34 |
| --            | chr13 | 63016638 | A   | C  | -- | -- | IGR    | SNP | 1.000 | 0  | 30 |
| --            | chr13 | 63026289 | AG  | -  | -- | -- | IGR    | DEL | 0.115 | 23 | 3  |
| --            | chr13 | 63342503 | T   | C  | -- | -- | IGR    | SNP | 0.929 | 2  | 26 |
| --            | chr13 | 63588997 | T   | C  | -- | -- | IGR    | SNP | 0.943 | 2  | 33 |
| --            | chr13 | 63714422 | G   | A  | -- | -- | IGR    | SNP | 0.857 | 6  | 36 |
| --            | chr13 | 63858976 | A   | G  | -- | -- | IGR    | SNP | 0.657 | 12 | 23 |
| --            | chr13 | 63939414 | C   | T  | -- | -- | IGR    | SNP | 0.926 | 2  | 25 |
| --            | chr13 | 64036847 | T   | A  | -- | -- | IGR    | SNP | 0.129 | 27 | 4  |
| --            | chr13 | 64408136 | G   | T  | -- | -- | IGR    | SNP | 0.120 | 22 | 3  |
| --            | chr13 | 64439044 | -   | CT | -- | -- | IGR    | INS | 0.105 | 17 | 2  |
| --            | chr13 | 64450756 | G   | C  | -- | -- | IGR    | SNP | 0.750 | 7  | 21 |
| --            | chr13 | 64651772 | G   | T  | -- | -- | IGR    | SNP | 0.700 | 12 | 28 |
| --            | chr13 | 64796541 | T   | C  | -- | -- | IGR    | SNP | 0.533 | 14 | 16 |
| --            | chr13 | 65111883 | CTA | -  | -- | -- | IGR    | DEL | 0.105 | 17 | 2  |
| --            | chr13 | 65153976 | G   | A  | -- | -- | IGR    | SNP | 0.897 | 4  | 35 |
| --            | chr13 | 65454876 | C   | T  | -- | -- | IGR    | SNP | 0.548 | 19 | 23 |
| --            | chr13 | 65551671 | T   | G  | -- | -- | IGR    | SNP | 0.864 | 3  | 19 |
| --            | chr13 | 65849094 | T   | C  | -- | -- | IGR    | SNP | 0.944 | 2  | 34 |
| --            | chr13 | 65946504 | C   | A  | -- | -- | IGR    | SNP | 0.160 | 21 | 4  |
| --            | chr13 | 66016916 | T   | C  | -- | -- | IGR    | SNP | 0.818 | 6  | 27 |
| --            | chr13 | 66111658 | T   | G  | -- | -- | IGR    | SNP | 0.917 | 3  | 33 |
| --            | chr13 | 66178202 | T   | G  | -- | -- | IGR    | SNP | 0.912 | 3  | 31 |
| --            | chr13 | 66299576 | T   | A  | -- | -- | IGR    | SNP | 0.139 | 31 | 5  |
| --            | chr13 | 66313783 | C   | T  | -- | -- | IGR    | SNP | 0.333 | 20 | 10 |
| --            | chr13 | 66353176 | C   | A  | -- | -- | IGR    | SNP | 0.609 | 9  | 14 |
| --            | chr13 | 66787189 | A   | G  | -- | -- | IGR    | SNP | 0.881 | 5  | 37 |
| --            | chr13 | 66798267 | T   | A  | -- | -- | IGR    | SNP | 0.480 | 13 | 12 |
| --            | chr13 | 66835689 | AG  | -  | -- | -- | IGR    | DEL | 0.107 | 25 | 3  |
| <i>PCDH9</i>  | chr13 | 66936972 | C   | A  | -- | -- | Intron | SNP | 0.930 | 3  | 40 |
| <i>PCDH9</i>  | chr13 | 66987758 | C   | G  | -- | -- | Intron | SNP | 1.000 | 0  | 14 |
| <i>PCDH9</i>  | chr13 | 67291532 | C   | T  | -- | -- | Intron | SNP | 0.857 | 2  | 12 |
| <i>PCDH9</i>  | chr13 | 67311870 | C   | T  | -- | -- | Intron | SNP | 0.133 | 26 | 4  |
| <i>PCDH9</i>  | chr13 | 67677094 | T   | C  | -- | -- | Intron | SNP | 0.152 | 28 | 5  |
| --            | chr13 | 68471319 | A   | T  | -- | -- | IGR    | SNP | 0.793 | 6  | 23 |
| --            | chr13 | 68489246 | A   | C  | -- | -- | IGR    | SNP | 0.500 | 19 | 19 |
| --            | chr13 | 68562557 | A   | T  | -- | -- | IGR    | SNP | 0.234 | 36 | 11 |
| --            | chr13 | 68870349 | A   | G  | -- | -- | IGR    | SNP | 0.290 | 22 | 9  |
| --            | chr13 | 68879101 | G   | T  | -- | -- | IGR    | SNP | 0.400 | 6  | 4  |
| --            | chr13 | 68881010 | G   | A  | -- | -- | IGR    | SNP | 0.930 | 3  | 40 |
| --            | chr13 | 69228500 | G   | A  | -- | -- | IGR    | SNP | 0.762 | 5  | 16 |
| --            | chr13 | 69880582 | C   | T  | -- | -- | IGR    | SNP | 0.611 | 14 | 22 |
| --            | chr13 | 69986659 | C   | T  | -- | -- | IGR    | SNP | 0.190 | 17 | 4  |
| --            | chr13 | 70000644 | G   | A  | -- | -- | IGR    | SNP | 0.867 | 4  | 26 |
| --            | chr13 | 70027929 | A   | C  | -- | -- | IGR    | SNP | 0.148 | 23 | 4  |
| --            | chr13 | 70239387 | T   | C  | -- | -- | IGR    | SNP | 0.892 | 4  | 33 |

|        |       |          |      |   |    |    |         |     |       |    |    |
|--------|-------|----------|------|---|----|----|---------|-----|-------|----|----|
| KLHL1  | chr13 | 70432152 | T    | A | -- | -- | Intron  | SNP | 0.182 | 18 | 4  |
| KLHL1  | chr13 | 70513532 | T    | C | -- | -- | Intron  | SNP | 0.429 | 4  | 3  |
| --     | chr13 | 70803414 | G    | A | -- | -- | IGR     | SNP | 0.381 | 13 | 8  |
| --     | chr13 | 71203099 | G    | A | -- | -- | IGR     | SNP | 0.250 | 27 | 9  |
| --     | chr13 | 71631579 | G    | C | -- | -- | IGR     | SNP | 0.389 | 22 | 14 |
| --     | chr13 | 71716129 | G    | A | -- | -- | IGR     | SNP | 0.938 | 2  | 30 |
| --     | chr13 | 71809066 | C    | A | -- | -- | IGR     | SNP | 0.182 | 18 | 4  |
| --     | chr13 | 71829550 | G    | C | -- | -- | IGR     | SNP | 0.889 | 5  | 40 |
| --     | chr13 | 71867816 | TTC  | - | -- | -- | IGR     | DEL | 0.120 | 22 | 3  |
| --     | chr13 | 71874892 | C    | A | -- | -- | IGR     | SNP | 0.219 | 25 | 7  |
| DACH1  | chr13 | 72213445 | C    | A | -- | -- | Intron  | SNP | 0.125 | 21 | 3  |
| DACH1  | chr13 | 72308649 | AC   | - | -- | -- | Intron  | DEL | 0.150 | 17 | 3  |
| --     | chr13 | 72540044 | C    | A | -- | -- | IGR     | SNP | 0.643 | 15 | 27 |
| --     | chr13 | 72612115 | CA   | - | -- | -- | IGR     | DEL | 0.609 | 9  | 14 |
| --     | chr13 | 72881038 | TA   | - | -- | -- | IGR     | DEL | 0.667 | 13 | 26 |
| --     | chr13 | 72957668 | C    | A | -- | -- | IGR     | SNP | 0.375 | 5  | 3  |
| PIBF1  | chr13 | 73405378 | A    | G | -- | -- | Intron  | SNP | 0.292 | 17 | 7  |
| PIBF1  | chr13 | 73405379 | G    | T | -- | -- | Intron  | SNP | 0.292 | 17 | 7  |
| --     | chr13 | 73625853 | C    | T | -- | -- | IGR     | SNP | 0.143 | 18 | 3  |
| --     | chr13 | 73678555 | C    | T | -- | -- | IGR     | SNP | 0.296 | 38 | 16 |
| --     | chr13 | 73737068 | T    | A | -- | -- | IGR     | SNP | 0.161 | 26 | 5  |
| --     | chr13 | 73834969 | C    | A | -- | -- | IGR     | SNP | 0.829 | 7  | 34 |
| --     | chr13 | 74218875 | G    | A | -- | -- | IGR     | SNP | 0.121 | 29 | 4  |
| --     | chr13 | 74218876 | C    | T | -- | -- | IGR     | SNP | 0.121 | 29 | 4  |
| KLF12  | chr13 | 74338616 | A    | T | -- | -- | Intron  | SNP | 0.111 | 24 | 3  |
| KLF12  | chr13 | 74391480 | G    | A | -- | -- | Intron  | SNP | 0.265 | 25 | 9  |
| KLF12  | chr13 | 74403949 | A    | T | -- | -- | Intron  | SNP | 0.192 | 21 | 5  |
| KLF12  | chr13 | 74497815 | C    | T | -- | -- | Intron  | SNP | 0.281 | 23 | 9  |
| --     | chr13 | 74781546 | C    | T | -- | -- | IGR     | SNP | 0.125 | 42 | 6  |
| --     | chr13 | 74972070 | T    | A | -- | -- | IGR     | SNP | 0.152 | 28 | 5  |
| --     | chr13 | 75111466 | A    | C | -- | -- | IGR     | SNP | 0.143 | 36 | 6  |
| --     | chr13 | 75111670 | G    | A | -- | -- | IGR     | SNP | 0.176 | 14 | 3  |
| --     | chr13 | 75111712 | A    | G | -- | -- | IGR     | SNP | 0.188 | 26 | 6  |
| --     | chr13 | 75183564 | G    | T | -- | -- | IGR     | SNP | 0.258 | 23 | 8  |
| --     | chr13 | 75317522 | C    | A | -- | -- | IGR     | SNP | 0.355 | 20 | 11 |
| --     | chr13 | 75589197 | G    | T | -- | -- | IGR     | SNP | 0.270 | 27 | 10 |
| LMO7   | chr13 | 76222177 | G    | A | -- | -- | Intron  | SNP | 0.167 | 30 | 6  |
| LMO7   | chr13 | 76260681 | A    | T | -- | -- | Intron  | SNP | 0.222 | 21 | 6  |
| LMO7   | chr13 | 76413863 | TC   | - | -- | -- | Intron  | DEL | 0.120 | 22 | 3  |
| --     | chr13 | 76530396 | T    | C | -- | -- | IGR     | SNP | 0.231 | 10 | 3  |
| --     | chr13 | 76772603 | A    | T | -- | -- | IGR     | SNP | 0.250 | 12 | 4  |
| --     | chr13 | 76979066 | T    | A | -- | -- | IGR     | SNP | 0.289 | 27 | 11 |
| --     | chr13 | 77027127 | G    | C | -- | -- | IGR     | SNP | 0.895 | 2  | 17 |
| --     | chr13 | 77191093 | C    | T | -- | -- | IGR     | SNP | 0.214 | 11 | 3  |
| --     | chr13 | 77278124 | T    | C | -- | -- | IGR     | SNP | 0.568 | 19 | 25 |
| CLN5   | chr13 | 77577309 | T    | G | -- | -- | 3'Flank | SNP | 0.138 | 25 | 4  |
| --     | chr13 | 78946468 | T    | C | -- | -- | IGR     | SNP | 0.556 | 8  | 10 |
| --     | chr13 | 79014580 | C    | A | -- | -- | IGR     | SNP | 0.333 | 16 | 8  |
| --     | chr13 | 79167575 | TTG  | - | -- | -- | IGR     | DEL | 0.114 | 31 | 4  |
| RNF219 | chr13 | 79222447 | CAG  | - | -- | -- | Intron  | DEL | 0.125 | 21 | 3  |
| --     | chr13 | 79522647 | G    | C | -- | -- | IGR     | SNP | 0.138 | 25 | 4  |
| --     | chr13 | 79675267 | G    | C | -- | -- | IGR     | SNP | 0.143 | 24 | 4  |
| --     | chr13 | 79772469 | C    | T | -- | -- | IGR     | SNP | 0.256 | 32 | 11 |
| --     | chr13 | 80007720 | G    | A | -- | -- | IGR     | SNP | 0.902 | 4  | 37 |
| --     | chr13 | 80319209 | G    | T | -- | -- | IGR     | SNP | 0.200 | 12 | 3  |
| --     | chr13 | 80388194 | T    | G | -- | -- | IGR     | SNP | 0.500 | 14 | 14 |
| --     | chr13 | 80732227 | A    | T | -- | -- | IGR     | SNP | 0.250 | 24 | 8  |
| --     | chr13 | 80760362 | T    | A | -- | -- | IGR     | SNP | 0.121 | 29 | 4  |
| --     | chr13 | 80886269 | C    | T | -- | -- | IGR     | SNP | 0.314 | 24 | 11 |
| --     | chr13 | 80957279 | AAT  | - | -- | -- | IGR     | DEL | 0.143 | 12 | 2  |
| --     | chr13 | 80968614 | T    | C | -- | -- | IGR     | SNP | 0.158 | 16 | 3  |
| --     | chr13 | 81135171 | T    | A | -- | -- | IGR     | SNP | 0.897 | 3  | 26 |
| --     | chr13 | 81158851 | G    | C | -- | -- | IGR     | SNP | 0.633 | 11 | 19 |
| --     | chr13 | 81275476 | C    | T | -- | -- | IGR     | SNP | 0.222 | 14 | 4  |
| --     | chr13 | 81526645 | C    | T | -- | -- | IGR     | SNP | 0.875 | 3  | 21 |
| --     | chr13 | 81532722 | C    | A | -- | -- | IGR     | SNP | 0.462 | 14 | 12 |
| --     | chr13 | 81662363 | G    | T | -- | -- | IGR     | SNP | 0.892 | 4  | 33 |
| --     | chr13 | 82208950 | A    | G | -- | -- | IGR     | SNP | 0.150 | 34 | 6  |
| --     | chr13 | 82744277 | T    | C | -- | -- | IGR     | SNP | 0.920 | 2  | 23 |
| --     | chr13 | 82758476 | A    | T | -- | -- | IGR     | SNP | 0.172 | 24 | 5  |
| --     | chr13 | 82859827 | T    | C | -- | -- | IGR     | SNP | 0.500 | 13 | 13 |
| --     | chr13 | 82991564 | T    | A | -- | -- | IGR     | SNP | 1.000 | 0  | 19 |
| --     | chr13 | 83262607 | TC   | - | -- | -- | IGR     | DEL | 0.205 | 35 | 9  |
| --     | chr13 | 83702613 | C    | T | -- | -- | IGR     | SNP | 0.216 | 29 | 8  |
| --     | chr13 | 83807240 | T    | A | -- | -- | IGR     | SNP | 0.424 | 19 | 14 |
| --     | chr13 | 84148987 | A    | C | -- | -- | IGR     | SNP | 0.930 | 3  | 40 |
| --     | chr13 | 84164235 | T    | A | -- | -- | IGR     | SNP | 0.316 | 13 | 6  |
| --     | chr13 | 84836970 | T    | A | -- | -- | IGR     | SNP | 0.333 | 10 | 5  |
| --     | chr13 | 84909871 | G    | A | -- | -- | IGR     | SNP | 0.735 | 9  | 25 |
| --     | chr13 | 85078728 | TTTA | - | -- | -- | IGR     | DEL | 0.385 | 16 | 10 |

|           |       |          |     |    |    |    |        |     |       |    |    |
|-----------|-------|----------|-----|----|----|----|--------|-----|-------|----|----|
| --        | chr13 | 85495908 | C   | T  | -- | -- | IGR    | SNP | 0.436 | 22 | 17 |
| --        | chr13 | 85702823 | -   | AC | -- | -- | IGR    | INS | 0.167 | 15 | 3  |
| --        | chr13 | 85725287 | T   | C  | -- | -- | IGR    | SNP | 0.217 | 18 | 5  |
| --        | chr13 | 85945534 | G   | A  | -- | -- | IGR    | SNP | 0.200 | 16 | 4  |
| --        | chr13 | 86199666 | A   | C  | -- | -- | IGR    | SNP | 0.348 | 15 | 8  |
| --        | chr13 | 86932500 | G   | A  | -- | -- | IGR    | SNP | 0.179 | 23 | 5  |
| --        | chr13 | 86973799 | A   | C  | -- | -- | IGR    | SNP | 0.893 | 3  | 25 |
| --        | chr13 | 87199919 | T   | C  | -- | -- | IGR    | SNP | 0.320 | 17 | 8  |
| --        | chr13 | 87373250 | G   | T  | -- | -- | IGR    | SNP | 0.894 | 5  | 42 |
| --        | chr13 | 87480591 | GT  | -  | -- | -- | IGR    | DEL | 0.485 | 17 | 16 |
| --        | chr13 | 87496492 | C   | T  | -- | -- | IGR    | SNP | 0.680 | 8  | 17 |
| --        | chr13 | 87746224 | T   | A  | -- | -- | IGR    | SNP | 0.300 | 28 | 12 |
| --        | chr13 | 87747302 | T   | G  | -- | -- | IGR    | SNP | 0.760 | 6  | 19 |
| --        | chr13 | 87829110 | T   | A  | -- | -- | IGR    | SNP | 0.125 | 28 | 4  |
| --        | chr13 | 87839866 | T   | C  | -- | -- | IGR    | SNP | 0.267 | 11 | 4  |
| --        | chr13 | 88028093 | G   | A  | -- | -- | IGR    | SNP | 0.400 | 9  | 6  |
| MIR4500HG | chr13 | 88143941 | C   | T  | -- | -- | RNA    | SNP | 0.111 | 32 | 4  |
| MIR4500HG | chr13 | 88198581 | A   | G  | -- | -- | RNA    | SNP | 0.267 | 22 | 8  |
| --        | chr13 | 88357298 | T   | G  | -- | -- | IGR    | SNP | 0.943 | 2  | 33 |
| --        | chr13 | 88435280 | C   | A  | -- | -- | IGR    | SNP | 0.962 | 1  | 25 |
| --        | chr13 | 88493673 | G   | T  | -- | -- | IGR    | SNP | 0.925 | 3  | 37 |
| --        | chr13 | 88504344 | G   | A  | -- | -- | IGR    | SNP | 0.567 | 13 | 17 |
| --        | chr13 | 88573375 | C   | A  | -- | -- | IGR    | SNP | 0.297 | 26 | 11 |
| --        | chr13 | 88667424 | A   | G  | -- | -- | IGR    | SNP | 0.220 | 32 | 9  |
| --        | chr13 | 88725122 | C   | A  | -- | -- | IGR    | SNP | 0.929 | 2  | 26 |
| --        | chr13 | 88725565 | G   | T  | -- | -- | IGR    | SNP | 0.194 | 29 | 7  |
| --        | chr13 | 88848289 | C   | A  | -- | -- | IGR    | SNP | 0.269 | 19 | 7  |
| --        | chr13 | 88938933 | A   | G  | -- | -- | IGR    | SNP | 0.857 | 4  | 24 |
| --        | chr13 | 88998039 | C   | T  | -- | -- | IGR    | SNP | 0.821 | 7  | 32 |
| --        | chr13 | 89080485 | G   | C  | -- | -- | IGR    | SNP | 0.929 | 3  | 39 |
| --        | chr13 | 89353836 | G   | C  | -- | -- | IGR    | SNP | 0.350 | 13 | 7  |
| --        | chr13 | 89355560 | G   | A  | -- | -- | IGR    | SNP | 0.806 | 6  | 25 |
| --        | chr13 | 89358601 | C   | T  | -- | -- | IGR    | SNP | 0.895 | 4  | 34 |
| --        | chr13 | 89656191 | G   | C  | -- | -- | IGR    | SNP | 0.897 | 3  | 26 |
| --        | chr13 | 89966266 | G   | A  | -- | -- | IGR    | SNP | 0.952 | 1  | 20 |
| --        | chr13 | 90195570 | TAC | -  | -- | -- | IGR    | DEL | 0.118 | 15 | 2  |
| --        | chr13 | 90344331 | G   | C  | -- | -- | IGR    | SNP | 0.944 | 2  | 34 |
| --        | chr13 | 90668860 | A   | C  | -- | -- | IGR    | SNP | 0.750 | 1  | 3  |
| --        | chr13 | 91396344 | G   | C  | -- | -- | IGR    | SNP | 0.906 | 3  | 29 |
| LINC00410 | chr13 | 91565148 | A   | C  | -- | -- | RNA    | SNP | 0.333 | 12 | 6  |
| --        | chr13 | 91738224 | T   | A  | -- | -- | IGR    | SNP | 0.375 | 20 | 12 |
| --        | chr13 | 91756795 | C   | T  | -- | -- | IGR    | SNP | 0.903 | 3  | 28 |
| GPC5      | chr13 | 92065994 | A   | T  | -- | -- | Intron | SNP | 0.433 | 17 | 13 |
| GPC5      | chr13 | 92151141 | C   | T  | -- | -- | Intron | SNP | 0.857 | 3  | 18 |
| GPC5      | chr13 | 92358541 | A   | G  | -- | -- | Intron | SNP | 0.588 | 14 | 20 |
| GPC5      | chr13 | 92456783 | T   | A  | -- | -- | Intron | SNP | 0.341 | 29 | 15 |
| GPC5      | chr13 | 92512764 | T   | A  | -- | -- | Intron | SNP | 0.857 | 3  | 18 |
| GPC5      | chr13 | 92707059 | T   | A  | -- | -- | Intron | SNP | 0.897 | 3  | 26 |
| GPC5      | chr13 | 92801712 | T   | A  | -- | -- | Intron | SNP | 0.842 | 6  | 32 |
| GPC5      | chr13 | 92801868 | A   | G  | -- | -- | Intron | SNP | 0.824 | 6  | 28 |
| GPC5      | chr13 | 92881959 | A   | T  | -- | -- | Intron | SNP | 0.906 | 3  | 29 |
| GPC5      | chr13 | 93087526 | A   | C  | -- | -- | Intron | SNP | 0.111 | 24 | 3  |
| GPC5      | chr13 | 93513101 | T   | G  | -- | -- | Intron | SNP | 0.939 | 2  | 31 |
| --        | chr13 | 93737437 | A   | G  | -- | -- | IGR    | SNP | 0.172 | 24 | 5  |
| --        | chr13 | 93737438 | G   | T  | -- | -- | IGR    | SNP | 0.200 | 24 | 6  |
| --        | chr13 | 93792579 | -   | CT | -- | -- | IGR    | INS | 0.130 | 20 | 3  |
| GPC6      | chr13 | 93892405 | C   | A  | -- | -- | Intron | SNP | 0.757 | 9  | 28 |
| GPC6      | chr13 | 93956144 | G   | T  | -- | -- | Intron | SNP | 0.286 | 10 | 4  |
| GPC6      | chr13 | 94072721 | G   | T  | -- | -- | Intron | SNP | 0.520 | 12 | 13 |
| GPC6      | chr13 | 94075568 | G   | T  | -- | -- | Intron | SNP | 0.971 | 1  | 33 |
| GPC6      | chr13 | 94153039 | C   | T  | -- | -- | Intron | SNP | 0.875 | 4  | 28 |
| GPC6      | chr13 | 94466280 | T   | C  | -- | -- | Intron | SNP | 0.429 | 20 | 15 |
| GPC6      | chr13 | 94515257 | G   | T  | -- | -- | Intron | SNP | 0.333 | 16 | 8  |
| GPC6      | chr13 | 94775918 | CTG | -  | -- | -- | Intron | DEL | 0.868 | 5  | 33 |
| GPC6      | chr13 | 95005829 | CAT | -  | -- | -- | Intron | DEL | 0.143 | 30 | 5  |
| DCT       | chr13 | 95103326 | A   | T  | -- | -- | Intron | SNP | 0.118 | 30 | 4  |
| --        | chr13 | 95425173 | T   | G  | -- | -- | IGR    | SNP | 0.485 | 17 | 16 |
| --        | chr13 | 95669302 | G   | A  | -- | -- | IGR    | SNP | 0.267 | 11 | 4  |
| CLDN10    | chr13 | 96225505 | G   | A  | -- | -- | Intron | SNP | 0.927 | 3  | 38 |
| DZIP1     | chr13 | 96260625 | A   | T  | -- | -- | Intron | SNP | 0.833 | 4  | 20 |
| UGGT2     | chr13 | 96545701 | T   | A  | -- | -- | Intron | SNP | 0.146 | 35 | 6  |
| UGGT2     | chr13 | 96609290 | G   | A  | -- | -- | Intron | SNP | 0.811 | 7  | 30 |
| UGGT2     | chr13 | 96655129 | G   | C  | -- | -- | Intron | SNP | 0.917 | 5  | 55 |
| --        | chr13 | 96716494 | -   | TA | -- | -- | IGR    | INS | 0.242 | 25 | 8  |
| HS6ST3    | chr13 | 97302026 | A   | G  | -- | -- | Intron | SNP | 0.154 | 33 | 6  |
| --        | chr13 | 97537584 | A   | G  | -- | -- | IGR    | SNP | 0.581 | 13 | 18 |
| --        | chr13 | 97537595 | A   | C  | -- | -- | IGR    | SNP | 0.538 | 18 | 21 |
| --        | chr13 | 97725044 | G   | C  | -- | -- | IGR    | SNP | 0.862 | 4  | 25 |
| FARP1     | chr13 | 99050176 | T   | A  | -- | -- | Intron | SNP | 0.308 | 9  | 4  |
| --        | chr13 | 99835742 | C   | T  | -- | -- | IGR    | SNP | 0.217 | 18 | 5  |

|            |       |           |     |   |    |    |        |     |       |    |    |
|------------|-------|-----------|-----|---|----|----|--------|-----|-------|----|----|
| --         | chr13 | 99837125  | G   | C | -- | -- | IGR    | SNP | 0.318 | 15 | 7  |
| MIR548AN   | chr13 | 100004298 | C   | G | -- | -- | RNA    | SNP | 0.556 | 20 | 25 |
| TM9SF2     | chr13 | 100203010 | G   | A | -- | -- | Intron | SNP | 0.939 | 2  | 31 |
| --         | chr13 | 100248604 | C   | A | -- | -- | IGR    | SNP | 0.279 | 31 | 12 |
| --         | chr13 | 100570192 | G   | C | -- | -- | IGR    | SNP | 0.905 | 4  | 38 |
| --         | chr13 | 100570269 | G   | A | -- | -- | IGR    | SNP | 0.857 | 7  | 42 |
| --         | chr13 | 100662554 | C   | T | -- | -- | IGR    | SNP | 0.375 | 10 | 6  |
| --         | chr13 | 100706721 | T   | A | -- | -- | IGR    | SNP | 0.182 | 45 | 10 |
| PCCA       | chr13 | 101096101 | C   | T | -- | -- | Intron | SNP | 0.333 | 34 | 17 |
| TMTC4      | chr13 | 101284147 | A   | C | -- | -- | Intron | SNP | 0.930 | 3  | 40 |
| --         | chr13 | 101345872 | G   | A | -- | -- | IGR    | SNP | 0.455 | 24 | 20 |
| --         | chr13 | 101519229 | C   | T | -- | -- | IGR    | SNP | 0.188 | 26 | 6  |
| --         | chr13 | 101536998 | GGT | - | -- | -- | IGR    | DEL | 0.148 | 22 | 4  |
| NALCN      | chr13 | 101954656 | A   | T | -- | -- | Intron | SNP | 0.390 | 25 | 16 |
| ITGBL1     | chr13 | 102236917 | A   | C | -- | -- | Intron | SNP | 0.143 | 24 | 4  |
| ITGBL1     | chr13 | 102280964 | G   | T | -- | -- | Intron | SNP | 0.250 | 12 | 4  |
| ITGBL1     | chr13 | 102331371 | C   | T | -- | -- | Intron | SNP | 0.595 | 17 | 25 |
| FGF14      | chr13 | 102462915 | T   | A | -- | -- | Intron | SNP | 0.533 | 14 | 16 |
| FGF14      | chr13 | 102540142 | T   | C | -- | -- | Intron | SNP | 0.652 | 16 | 30 |
| FGF14      | chr13 | 102696659 | G   | A | -- | -- | Intron | SNP | 0.892 | 4  | 33 |
| FGF14      | chr13 | 102704222 | A   | G | -- | -- | Intron | SNP | 0.881 | 5  | 37 |
| FGF14      | chr13 | 102833251 | C   | A | -- | -- | Intron | SNP | 0.233 | 23 | 7  |
| FGF14      | chr13 | 102890325 | T   | A | -- | -- | Intron | SNP | 0.459 | 20 | 17 |
| --         | chr13 | 103238994 | G   | C | -- | -- | IGR    | SNP | 0.893 | 6  | 50 |
| BIVM-ERCC5 | chr13 | 103500045 | G   | T | -- | -- | Intron | SNP | 0.424 | 19 | 14 |
| LOC121952  | chr13 | 103548200 | C   | A | -- | -- | RNA    | SNP | 0.167 | 20 | 4  |
| --         | chr13 | 103677994 | G   | T | -- | -- | IGR    | SNP | 0.789 | 8  | 30 |
| --         | chr13 | 104137748 | G   | A | -- | -- | IGR    | SNP | 0.939 | 2  | 31 |
| --         | chr13 | 104156863 | A   | T | -- | -- | IGR    | SNP | 0.333 | 12 | 6  |
| --         | chr13 | 105012180 | C   | G | -- | -- | IGR    | SNP | 0.357 | 18 | 10 |
| --         | chr13 | 105279193 | A   | T | -- | -- | IGR    | SNP | 0.808 | 5  | 21 |
| --         | chr13 | 105306833 | T   | C | -- | -- | IGR    | SNP | 0.130 | 20 | 3  |
| --         | chr13 | 105911418 | G   | T | -- | -- | IGR    | SNP | 0.333 | 8  | 4  |
| --         | chr13 | 106784023 | G   | A | -- | -- | IGR    | SNP | 0.646 | 17 | 31 |
| --         | chr13 | 107257673 | G   | T | -- | -- | IGR    | SNP | 0.292 | 34 | 14 |
| --         | chr13 | 107409687 | GAA | - | -- | -- | IGR    | DEL | 0.125 | 21 | 3  |
| --         | chr13 | 107434688 | C   | T | -- | -- | IGR    | SNP | 0.400 | 12 | 8  |
| FAM155A    | chr13 | 107918274 | G   | T | -- | -- | Intron | SNP | 0.868 | 5  | 33 |
| FAM155A    | chr13 | 108260781 | G   | T | -- | -- | Intron | SNP | 0.172 | 24 | 5  |
| FAM155A    | chr13 | 108310355 | G   | C | -- | -- | Intron | SNP | 0.588 | 14 | 20 |
| FAM155A    | chr13 | 108411751 | T   | G | -- | -- | Intron | SNP | 0.200 | 24 | 6  |
| --         | chr13 | 108855424 | T   | G | -- | -- | IGR    | SNP | 0.548 | 14 | 17 |
| --         | chr13 | 108857017 | T   | A | -- | -- | IGR    | SNP | 0.256 | 29 | 10 |
| --         | chr13 | 108977688 | G   | T | -- | -- | IGR    | SNP | 0.561 | 18 | 23 |
| --         | chr13 | 108982116 | G   | A | -- | -- | IGR    | SNP | 0.308 | 9  | 4  |
| --         | chr13 | 109093373 | C   | T | -- | -- | IGR    | SNP | 0.909 | 3  | 30 |
| --         | chr13 | 109146661 | T   | G | -- | -- | IGR    | SNP | 1.000 | 0  | 34 |
| MYO16      | chr13 | 109344193 | G   | T | -- | -- | Intron | SNP | 0.265 | 25 | 9  |
| MYO16      | chr13 | 109370096 | G   | A | -- | -- | Intron | SNP | 0.921 | 3  | 35 |
| MYO16      | chr13 | 109637188 | C   | A | -- | -- | Intron | SNP | 0.143 | 36 | 6  |
| MYO16      | chr13 | 109700511 | G   | A | -- | -- | Intron | SNP | 0.333 | 10 | 5  |
| --         | chr13 | 109908906 | G   | T | -- | -- | IGR    | SNP | 0.919 | 3  | 34 |
| --         | chr13 | 110157151 | G   | A | -- | -- | IGR    | SNP | 0.600 | 4  | 6  |
| --         | chr13 | 110237772 | G   | T | -- | -- | IGR    | SNP | 0.333 | 28 | 14 |
| --         | chr13 | 110322259 | A   | G | -- | -- | IGR    | SNP | 0.244 | 31 | 10 |
| --         | chr13 | 110344248 | G   | A | -- | -- | IGR    | SNP | 0.875 | 6  | 42 |
| --         | chr13 | 110447619 | T   | C | -- | -- | IGR    | SNP | 0.533 | 21 | 24 |
| --         | chr13 | 110538801 | G   | C | -- | -- | IGR    | SNP | 0.279 | 31 | 12 |
| COL4A2     | chr13 | 110971054 | G   | A | -- | -- | Intron | SNP | 0.188 | 39 | 9  |
| COL4A2     | chr13 | 110979658 | T   | G | -- | -- | Intron | SNP | 0.140 | 37 | 6  |
| COL4A2     | chr13 | 111115878 | A   | G | -- | -- | Intron | SNP | 0.396 | 29 | 19 |
| --         | chr13 | 111245790 | A   | T | -- | -- | IGR    | SNP | 0.556 | 4  | 5  |
| --         | chr13 | 111492528 | T   | A | -- | -- | IGR    | SNP | 0.205 | 35 | 9  |
| --         | chr13 | 111962756 | G   | T | -- | -- | IGR    | SNP | 0.294 | 36 | 15 |
| --         | chr13 | 112028936 | T   | G | -- | -- | IGR    | SNP | 0.152 | 28 | 5  |
| --         | chr13 | 112344145 | A   | G | -- | -- | IGR    | SNP | 0.581 | 13 | 18 |
| --         | chr13 | 112518614 | A   | G | -- | -- | IGR    | SNP | 0.152 | 28 | 5  |
| --         | chr13 | 112672911 | G   | A | -- | -- | IGR    | SNP | 0.370 | 17 | 10 |
| --         | chr13 | 112840539 | C   | G | -- | -- | IGR    | SNP | 0.909 | 4  | 40 |
| --         | chr13 | 112928557 | G   | A | -- | -- | IGR    | SNP | 0.851 | 7  | 40 |
| --         | chr13 | 112962274 | T   | A | -- | -- | IGR    | SNP | 1.000 | 0  | 4  |
| --         | chr13 | 112977425 | G   | T | -- | -- | IGR    | SNP | 0.254 | 53 | 18 |
| ATP11A     | chr13 | 113518842 | G   | A | -- | -- | Intron | SNP | 0.357 | 9  | 5  |
| MCF2L      | chr13 | 113666060 | C   | T | -- | -- | Intron | SNP | 0.154 | 55 | 10 |
| MCF2L      | chr13 | 113666255 | T   | C | -- | -- | Intron | SNP | 0.600 | 4  | 6  |
| F7         | chr13 | 113761619 | G   | A | -- | -- | Intron | SNP | 0.480 | 13 | 12 |
| ADPRHL1    | chr13 | 114090559 | G   | T | -- | -- | Intron | SNP | 0.182 | 18 | 4  |
| TFDP1      | chr13 | 114279313 | G   | A | -- | -- | Intron | SNP | 0.217 | 18 | 5  |
| TFDP1      | chr13 | 114279356 | T   | C | -- | -- | Intron | SNP | 0.172 | 24 | 5  |
| TFDP1      | chr13 | 114279377 | T   | C | -- | -- | Intron | SNP | 0.161 | 26 | 5  |



|                   |       |           |      |       |      |      |                 |     |       |    |    |
|-------------------|-------|-----------|------|-------|------|------|-----------------|-----|-------|----|----|
| <i>TFDP1</i>      | chr13 | 114279757 | T    | C     | --   | --   | Intron          | SNP | 0.208 | 19 | 5  |
| <i>FAM70B</i>     | chr13 | 114509681 | C    | T     | --   | --   | Intron          | SNP | 0.178 | 37 | 8  |
| <i>GAS6</i>       | chr13 | 114553728 | C    | A     | --   | --   | Intron          | SNP | 0.908 | 6  | 59 |
| <i>FLJ44054</i>   | chr13 | 114603276 | A    | G     | --   | --   | RNA             | SNP | 0.149 | 40 | 7  |
| --                | chr13 | 114899324 | C    | T     | --   | --   | IGR             | SNP | 0.267 | 11 | 4  |
| --                | chr14 | 19025545  | T    | C     | --   | --   | IGR             | SNP | 0.159 | 37 | 7  |
| --                | chr14 | 19025554  | C    | T     | --   | --   | IGR             | SNP | 0.149 | 40 | 7  |
| --                | chr14 | 19027479  | C    | T     | --   | --   | IGR             | SNP | 0.109 | 41 | 5  |
| --                | chr14 | 19048460  | C    | T     | --   | --   | IGR             | SNP | 0.111 | 40 | 5  |
| --                | chr14 | 19048485  | A    | T     | --   | --   | IGR             | SNP | 0.147 | 29 | 5  |
| --                | chr14 | 19048642  | T    | G     | --   | --   | IGR             | SNP | 0.128 | 34 | 5  |
| --                | chr14 | 19048990  | T    | G     | --   | --   | IGR             | SNP | 0.103 | 26 | 3  |
| --                | chr14 | 19067541  | C    | T     | --   | --   | IGR             | SNP | 0.183 | 49 | 11 |
| --                | chr14 | 19067557  | A    | C     | --   | --   | IGR             | SNP | 0.193 | 46 | 11 |
| --                | chr14 | 19091514  | A    | G     | --   | --   | IGR             | SNP | 0.197 | 53 | 13 |
| --                | chr14 | 19092535  | C    | A     | --   | --   | IGR             | SNP | 0.118 | 45 | 6  |
| --                | chr14 | 19102721  | G    | A     | --   | --   | IGR             | SNP | 0.151 | 45 | 8  |
| --                | chr14 | 19107045  | C    | T     | --   | --   | IGR             | SNP | 0.480 | 13 | 12 |
| --                | chr14 | 19135259  | G    | A     | --   | --   | IGR             | SNP | 0.200 | 16 | 4  |
| --                | chr14 | 19168550  | T    | C     | --   | --   | IGR             | SNP | 0.304 | 16 | 7  |
| --                | chr14 | 19322891  | -    | GTA   | --   | --   | IGR             | INS | 0.133 | 13 | 2  |
| --                | chr14 | 19363349  | G    | A     | --   | --   | IGR             | SNP | 0.222 | 28 | 8  |
| --                | chr14 | 19476833  | A    | G     | --   | --   | IGR             | SNP | 0.368 | 12 | 7  |
| --                | chr14 | 19480317  | C    | G     | --   | --   | IGR             | SNP | 0.348 | 30 | 16 |
| --                | chr14 | 19512072  | G    | T     | --   | --   | IGR             | SNP | 0.320 | 17 | 8  |
| --                | chr14 | 19696305  | G    | A     | --   | --   | IGR             | SNP | 0.118 | 30 | 4  |
| --                | chr14 | 19705920  | TTTG | -     | --   | --   | IGR             | DEL | 0.136 | 19 | 3  |
| --                | chr14 | 19745710  | G    | A     | --   | --   | IGR             | SNP | 0.208 | 19 | 5  |
| --                | chr14 | 19771003  | -    | TAATA | --   | --   | IGR             | INS | 0.105 | 17 | 2  |
| --                | chr14 | 19775046  | G    | A     | --   | --   | IGR             | SNP | 0.132 | 33 | 5  |
| --                | chr14 | 19777587  | GA   | -     | --   | --   | IGR             | DEL | 0.467 | 8  | 7  |
| --                | chr14 | 19799474  | T    | G     | --   | --   | IGR             | SNP | 0.154 | 22 | 4  |
| --                | chr14 | 19810696  | A    | C     | --   | --   | IGR             | SNP | 0.194 | 50 | 12 |
| --                | chr14 | 19906088  | A    | G     | --   | --   | IGR             | SNP | 0.242 | 25 | 8  |
| --                | chr14 | 20143101  | C    | A     | --   | --   | IGR             | SNP | 0.154 | 22 | 4  |
| --                | chr14 | 20163911  | T    | C     | --   | --   | IGR             | SNP | 0.109 | 49 | 6  |
| --                | chr14 | 20183978  | T    | C     | --   | --   | IGR             | SNP | 0.115 | 23 | 3  |
| --                | chr14 | 20184083  | CA   | -     | --   | --   | IGR             | DEL | 0.214 | 33 | 9  |
| --                | chr14 | 20212943  | GC   | -     | --   | --   | IGR             | DEL | 0.466 | 31 | 27 |
| --                | chr14 | 20574000  | TA   | -     | --   | --   | IGR             | DEL | 0.125 | 14 | 2  |
| --                | chr14 | 21021059  | A    | G     | --   | --   | IGR             | SNP | 0.308 | 18 | 8  |
| <i>RNASE9</i>     | chr14 | 21027240  | G    | C     | --   | --   | Intron          | SNP | 0.850 | 3  | 17 |
| --                | chr14 | 21288049  | C    | A     | --   | --   | IGR             | SNP | 0.500 | 3  | 3  |
| --                | chr14 | 21331213  | A    | G     | --   | --   | IGR             | SNP | 0.308 | 9  | 4  |
| <i>RNASE3</i>     | chr14 | 21358938  | T    | G     | --   | --   | 5'Flank         | SNP | 0.429 | 20 | 15 |
| <i>NDRG2</i>      | chr14 | 21484320  | G    | T     | --   | --   | 3'Flank         | SNP | 0.250 | 9  | 3  |
| <i>OR10G2</i>     | chr14 | 22102964  | A    | G     | T35C | V12A | Missense_mutati | SNP | 0.917 | 3  | 33 |
| --                | chr14 | 22124567  | ACT  | -     | --   | --   | IGR             | DEL | 0.130 | 20 | 3  |
| --                | chr14 | 22177306  | G    | T     | --   | --   | IGR             | SNP | 0.214 | 33 | 9  |
| --                | chr14 | 22245659  | G    | T     | --   | --   | IGR             | SNP | 0.333 | 6  | 3  |
| --                | chr14 | 22271738  | A    | G     | --   | --   | IGR             | SNP | 0.941 | 1  | 16 |
| --                | chr14 | 22420838  | G    | A     | --   | --   | IGR             | SNP | 0.893 | 3  | 25 |
| --                | chr14 | 22518936  | A    | G     | --   | --   | IGR             | SNP | 0.882 | 2  | 15 |
| --                | chr14 | 22549447  | T    | C     | --   | --   | IGR             | SNP | 0.333 | 8  | 4  |
| --                | chr14 | 22895696  | T    | A     | --   | --   | IGR             | SNP | 0.375 | 15 | 9  |
| <i>DAD1</i>       | chr14 | 23044871  | G    | T     | --   | --   | Intron          | SNP | 0.355 | 20 | 11 |
| --                | chr14 | 23085999  | A    | C     | --   | --   | IGR             | SNP | 0.214 | 22 | 6  |
| --                | chr14 | 23086184  | A    | C     | --   | --   | IGR             | SNP | 0.192 | 21 | 5  |
| --                | chr14 | 23106113  | T    | C     | --   | --   | IGR             | SNP | 0.308 | 9  | 4  |
| --                | chr14 | 23106121  | C    | T     | --   | --   | IGR             | SNP | 0.200 | 12 | 3  |
| --                | chr14 | 23166804  | C    | A     | --   | --   | IGR             | SNP | 0.862 | 4  | 25 |
| --                | chr14 | 23170538  | A    | G     | --   | --   | IGR             | SNP | 0.459 | 20 | 17 |
| --                | chr14 | 23506917  | TG   | -     | --   | --   | IGR             | DEL | 0.120 | 22 | 3  |
| <i>MYH7</i>       | chr14 | 23895758  | A    | T     | --   | --   | Intron          | SNP | 0.467 | 24 | 21 |
| <i>MYH7</i>       | chr14 | 23899953  | G    | T     | --   | --   | Intron          | SNP | 0.861 | 5  | 31 |
| <i>MYH7</i>       | chr14 | 23900275  | G    | C     | --   | --   | Intron          | SNP | 0.865 | 5  | 32 |
| <i>MYH7</i>       | chr14 | 23900558  | G    | A     | --   | --   | Intron          | SNP | 0.839 | 10 | 52 |
| <i>NEDD8,NEDC</i> | chr14 | 24692618  | G    | A     | --   | --   | Intron          | SNP | 0.667 | 7  | 14 |
| --                | chr14 | 24962688  | T    | C     | --   | --   | IGR             | SNP | 0.240 | 19 | 6  |
| --                | chr14 | 24962693  | A    | G     | --   | --   | IGR             | SNP | 0.250 | 18 | 6  |
| <i>STXBP6</i>     | chr14 | 25356617  | G    | A     | --   | --   | Intron          | SNP | 0.348 | 15 | 8  |
| <i>STXBP6</i>     | chr14 | 25395195  | G    | T     | --   | --   | Intron          | SNP | 0.389 | 11 | 7  |
| <i>STXBP6</i>     | chr14 | 25423783  | G    | A     | --   | --   | Intron          | SNP | 0.829 | 7  | 34 |
| --                | chr14 | 25811282  | G    | T     | --   | --   | IGR             | SNP | 0.214 | 11 | 3  |
| --                | chr14 | 25834642  | CTT  | -     | --   | --   | IGR             | DEL | 0.286 | 10 | 4  |
| --                | chr14 | 26098255  | C    | A     | --   | --   | IGR             | SNP | 0.405 | 22 | 15 |
| --                | chr14 | 26117364  | T    | G     | --   | --   | IGR             | SNP | 0.806 | 6  | 25 |
| --                | chr14 | 26390062  | T    | C     | --   | --   | IGR             | SNP | 0.400 | 12 | 8  |
| --                | chr14 | 26674311  | G    | A     | --   | --   | IGR             | SNP | 0.750 | 2  | 6  |
| --                | chr14 | 26719605  | AAC  | -     | --   | --   | IGR             | DEL | 0.107 | 25 | 3  |

|                 |       |          |           |   |    |    |        |     |       |    |    |
|-----------------|-------|----------|-----------|---|----|----|--------|-----|-------|----|----|
| --              | chr14 | 27103667 | T         | C | -- | -- | IGR    | SNP | 0.300 | 7  | 3  |
| --              | chr14 | 27103668 | A         | C | -- | -- | IGR    | SNP | 0.300 | 7  | 3  |
| --              | chr14 | 27190124 | G         | A | -- | -- | IGR    | SNP | 0.550 | 9  | 11 |
| --              | chr14 | 27348775 | T         | A | -- | -- | IGR    | SNP | 0.974 | 1  | 38 |
| --              | chr14 | 27476733 | A         | T | -- | -- | IGR    | SNP | 0.800 | 5  | 20 |
| --              | chr14 | 27745927 | C         | T | -- | -- | IGR    | SNP | 0.440 | 14 | 11 |
| --              | chr14 | 27820744 | T         | A | -- | -- | IGR    | SNP | 0.231 | 10 | 3  |
| --              | chr14 | 28073242 | G         | A | -- | -- | IGR    | SNP | 0.857 | 6  | 36 |
| --              | chr14 | 28278051 | CTCATT    | - | -- | -- | IGR    | DEL | 0.176 | 14 | 3  |
| --              | chr14 | 28286667 | A         | G | -- | -- | IGR    | SNP | 0.200 | 16 | 4  |
| --              | chr14 | 28290317 | G         | A | -- | -- | IGR    | SNP | 0.375 | 10 | 6  |
| --              | chr14 | 28298354 | A         | T | -- | -- | IGR    | SNP | 0.161 | 26 | 5  |
| --              | chr14 | 28324943 | C         | A | -- | -- | IGR    | SNP | 0.150 | 17 | 3  |
| --              | chr14 | 28537009 | G         | C | -- | -- | IGR    | SNP | 0.611 | 14 | 22 |
| --              | chr14 | 28587744 | C         | A | -- | -- | IGR    | SNP | 0.520 | 12 | 13 |
| --              | chr14 | 28597127 | A         | G | -- | -- | IGR    | SNP | 0.238 | 16 | 5  |
| --              | chr14 | 28676656 | T         | A | -- | -- | IGR    | SNP | 0.364 | 21 | 12 |
| --              | chr14 | 28793918 | C         | A | -- | -- | IGR    | SNP | 0.333 | 26 | 13 |
| --              | chr14 | 28837376 | G         | A | -- | -- | IGR    | SNP | 0.556 | 12 | 15 |
| --              | chr14 | 28949513 | A         | C | -- | -- | IGR    | SNP | 0.500 | 18 | 18 |
| --              | chr14 | 28961649 | G         | A | -- | -- | IGR    | SNP | 0.295 | 43 | 18 |
| --              | chr14 | 28977585 | T         | G | -- | -- | IGR    | SNP | 0.342 | 25 | 13 |
| <i>C14orf23</i> | chr14 | 29255616 | AT        | - | -- | -- | RNA    | DEL | 0.103 | 35 | 4  |
| --              | chr14 | 29321874 | GTA       | - | -- | -- | IGR    | DEL | 0.133 | 26 | 4  |
| --              | chr14 | 29336739 | A         | T | -- | -- | IGR    | SNP | 0.188 | 26 | 6  |
| --              | chr14 | 29339175 | C         | G | -- | -- | IGR    | SNP | 0.154 | 22 | 4  |
| --              | chr14 | 29469670 | T         | A | -- | -- | IGR    | SNP | 0.714 | 8  | 20 |
| --              | chr14 | 29583533 | G         | T | -- | -- | IGR    | SNP | 0.308 | 18 | 8  |
| --              | chr14 | 29587122 | G         | T | -- | -- | IGR    | SNP | 0.220 | 32 | 9  |
| --              | chr14 | 29735329 | T         | A | -- | -- | IGR    | SNP | 0.167 | 25 | 5  |
| --              | chr14 | 29769714 | A         | C | -- | -- | IGR    | SNP | 0.120 | 22 | 3  |
| --              | chr14 | 29878805 | G         | A | -- | -- | IGR    | SNP | 0.258 | 23 | 8  |
| <i>MIR548AI</i> | chr14 | 29984291 | C         | A | -- | -- | RNA    | SNP | 0.407 | 32 | 22 |
| <i>MIR548AI</i> | chr14 | 30013678 | G         | T | -- | -- | RNA    | SNP | 0.308 | 9  | 4  |
| <i>PRKD1</i>    | chr14 | 30367475 | C         | T | -- | -- | Intron | SNP | 0.333 | 16 | 8  |
| <i>PRKD1</i>    | chr14 | 30389221 | G         | A | -- | -- | Intron | SNP | 0.125 | 28 | 4  |
| <i>PRKD1</i>    | chr14 | 30389266 | G         | A | -- | -- | Intron | SNP | 0.214 | 22 | 6  |
| --              | chr14 | 30526384 | T         | G | -- | -- | IGR    | SNP | 0.233 | 23 | 7  |
| --              | chr14 | 30684429 | T         | A | -- | -- | IGR    | SNP | 0.140 | 37 | 6  |
| --              | chr14 | 31259276 | G         | A | -- | -- | IGR    | SNP | 0.667 | 13 | 26 |
| <i>STRN3</i>    | chr14 | 31446835 | AC        | - | -- | -- | Intron | DEL | 0.115 | 23 | 3  |
| <i>STRN3</i>    | chr14 | 31485542 | G         | C | -- | -- | Intron | SNP | 0.519 | 13 | 14 |
| --              | chr14 | 31743128 | C         | A | -- | -- | IGR    | SNP | 0.250 | 15 | 5  |
| --              | chr14 | 31755764 | G         | T | -- | -- | IGR    | SNP | 0.190 | 17 | 4  |
| <i>HEATR5A</i>  | chr14 | 31876203 | G         | A | -- | -- | Intron | SNP | 0.158 | 16 | 3  |
| <i>NUBPL</i>    | chr14 | 32267528 | G         | T | -- | -- | Intron | SNP | 0.267 | 11 | 4  |
| <i>NUBPL</i>    | chr14 | 32270188 | C         | T | -- | -- | Intron | SNP | 0.269 | 38 | 14 |
| --              | chr14 | 32683001 | G         | A | -- | -- | IGR    | SNP | 0.167 | 20 | 4  |
| <i>AKAP6</i>    | chr14 | 32860301 | C         | A | -- | -- | Intron | SNP | 0.333 | 34 | 17 |
| <i>AKAP6</i>    | chr14 | 32919530 | TGA       | - | -- | -- | Intron | DEL | 0.105 | 34 | 4  |
| <i>AKAP6</i>    | chr14 | 33001625 | AC        | - | -- | -- | Intron | DEL | 0.382 | 34 | 21 |
| <i>AKAP6</i>    | chr14 | 33032174 | A         | T | -- | -- | Intron | SNP | 0.261 | 17 | 6  |
| <i>AKAP6</i>    | chr14 | 33032175 | G         | T | -- | -- | Intron | SNP | 0.261 | 17 | 6  |
| <i>AKAP6</i>    | chr14 | 33184121 | C         | A | -- | -- | Intron | SNP | 0.234 | 36 | 11 |
| --              | chr14 | 33391219 | C         | T | -- | -- | IGR    | SNP | 0.200 | 12 | 3  |
| <i>NPAS3</i>    | chr14 | 33869449 | G         | A | -- | -- | Intron | SNP | 0.438 | 18 | 14 |
| <i>NPAS3</i>    | chr14 | 34130928 | G         | A | -- | -- | Intron | SNP | 0.692 | 12 | 27 |
| <i>NPAS3</i>    | chr14 | 34171241 | G         | T | -- | -- | Intron | SNP | 0.305 | 41 | 18 |
| <i>NPAS3</i>    | chr14 | 34212825 | T         | G | -- | -- | Intron | SNP | 0.361 | 23 | 13 |
| <i>NPAS3</i>    | chr14 | 34239791 | G         | C | -- | -- | Intron | SNP | 0.315 | 37 | 17 |
| --              | chr14 | 34348340 | C         | A | -- | -- | IGR    | SNP | 0.154 | 22 | 4  |
| --              | chr14 | 34381529 | G         | C | -- | -- | IGR    | SNP | 0.349 | 28 | 15 |
| --              | chr14 | 34457084 | T         | C | -- | -- | IGR    | SNP | 0.268 | 41 | 15 |
| --              | chr14 | 34824816 | C         | G | -- | -- | IGR    | SNP | 0.268 | 41 | 15 |
| --              | chr14 | 34980120 | G         | A | -- | -- | IGR    | SNP | 0.267 | 11 | 4  |
| <i>SNX6</i>     | chr14 | 35044389 | A         | C | -- | -- | Intron | SNP | 0.174 | 19 | 4  |
| --              | chr14 | 35107455 | G         | T | -- | -- | IGR    | SNP | 0.154 | 22 | 4  |
| --              | chr14 | 35391202 | G         | C | -- | -- | IGR    | SNP | 0.355 | 20 | 11 |
| <i>PPP2R3C</i>  | chr14 | 35575308 | C         | A | -- | -- | Intron | SNP | 0.273 | 16 | 6  |
| <i>PSMA6</i>    | chr14 | 35777146 | G         | T | -- | -- | Intron | SNP | 0.300 | 35 | 15 |
| <i>RALGAPA1</i> | chr14 | 36125155 | A         | T | -- | -- | Intron | SNP | 0.333 | 28 | 14 |
| --              | chr14 | 36453010 | CACACATAT | - | -- | -- | IGR    | DEL | 0.136 | 19 | 3  |
| --              | chr14 | 36474250 | T         | A | -- | -- | IGR    | SNP | 0.217 | 18 | 5  |
| --              | chr14 | 36633240 | G         | T | -- | -- | IGR    | SNP | 0.300 | 28 | 12 |
| --              | chr14 | 36858647 | G         | T | -- | -- | IGR    | SNP | 0.297 | 26 | 11 |
| <i>SFTA3</i>    | chr14 | 36968562 | T         | A | -- | -- | Intron | SNP | 0.167 | 35 | 7  |
| <i>SLC25A21</i> | chr14 | 37292983 | C         | A | -- | -- | Intron | SNP | 0.267 | 33 | 12 |
| <i>SLC25A21</i> | chr14 | 37376814 | C         | G | -- | -- | Intron | SNP | 0.341 | 29 | 15 |
| <i>MIPOL1</i>   | chr14 | 37990130 | A         | T | -- | -- | Intron | SNP | 0.455 | 6  | 5  |
| --              | chr14 | 39105360 | A         | G | -- | -- | IGR    | SNP | 0.211 | 15 | 4  |

|                  |       |          |     |    |        |       |                 |     |       |    |    |
|------------------|-------|----------|-----|----|--------|-------|-----------------|-----|-------|----|----|
| --               | chr14 | 39496440 | T   | A  | --     | --    | IGR             | SNP | 0.391 | 28 | 18 |
| --               | chr14 | 39845960 | C   | A  | --     | --    | IGR             | SNP | 0.359 | 25 | 14 |
| --               | chr14 | 40068275 | T   | C  | --     | --    | IGR             | SNP | 0.588 | 14 | 20 |
| --               | chr14 | 40132849 | T   | A  | --     | --    | IGR             | SNP | 0.324 | 23 | 11 |
| --               | chr14 | 40604310 | C   | G  | --     | --    | IGR             | SNP | 0.783 | 5  | 18 |
| --               | chr14 | 40653970 | C   | T  | --     | --    | IGR             | SNP | 0.254 | 47 | 16 |
| --               | chr14 | 40670073 | G   | A  | --     | --    | IGR             | SNP | 0.452 | 23 | 19 |
| --               | chr14 | 40670155 | T   | A  | --     | --    | IGR             | SNP | 0.475 | 21 | 19 |
| --               | chr14 | 40793837 | A   | G  | --     | --    | IGR             | SNP | 0.226 | 24 | 7  |
| --               | chr14 | 40796459 | C   | T  | --     | --    | IGR             | SNP | 0.250 | 9  | 3  |
| --               | chr14 | 41102620 | T   | A  | --     | --    | IGR             | SNP | 0.132 | 46 | 7  |
| --               | chr14 | 41118013 | C   | A  | --     | --    | IGR             | SNP | 0.467 | 8  | 7  |
| --               | chr14 | 41299314 | T   | G  | --     | --    | IGR             | SNP | 0.519 | 13 | 14 |
| --               | chr14 | 41465541 | A   | T  | --     | --    | IGR             | SNP | 0.186 | 35 | 8  |
| <i>LRFN5</i>     | chr14 | 42147035 | G   | A  | --     | --    | Intron          | SNP | 0.257 | 26 | 9  |
| <i>LRFN5</i>     | chr14 | 42250760 | AAG | -  | --     | --    | Intron          | DEL | 0.125 | 21 | 3  |
| <i>LRFN5</i>     | chr14 | 42345635 | C   | T  | --     | --    | Intron          | SNP | 0.375 | 15 | 9  |
| <i>LRFN5</i>     | chr14 | 42345664 | TC  | -  | --     | --    | Intron          | DEL | 0.150 | 17 | 3  |
| <i>LRFN5</i>     | chr14 | 42354949 | G   | C  | --     | --    | Intron          | SNP | 0.342 | 25 | 13 |
| --               | chr14 | 42509206 | G   | T  | --     | --    | IGR             | SNP | 0.194 | 29 | 7  |
| --               | chr14 | 43058611 | G   | C  | --     | --    | IGR             | SNP | 0.289 | 27 | 11 |
| --               | chr14 | 43264347 | TC  | -  | --     | --    | IGR             | DEL | 0.111 | 24 | 3  |
| --               | chr14 | 43292679 | C   | T  | --     | --    | IGR             | SNP | 0.174 | 19 | 4  |
| --               | chr14 | 43616481 | C   | G  | --     | --    | IGR             | SNP | 0.143 | 36 | 6  |
| --               | chr14 | 43680756 | G   | A  | --     | --    | IGR             | SNP | 0.220 | 32 | 9  |
| --               | chr14 | 43680757 | A   | G  | --     | --    | IGR             | SNP | 0.214 | 33 | 9  |
| --               | chr14 | 43731888 | G   | C  | --     | --    | IGR             | SNP | 0.211 | 15 | 4  |
| --               | chr14 | 43735350 | C   | T  | --     | --    | IGR             | SNP | 0.333 | 4  | 2  |
| --               | chr14 | 43746038 | C   | T  | --     | --    | IGR             | SNP | 0.680 | 16 | 34 |
| --               | chr14 | 43810412 | G   | A  | --     | --    | IGR             | SNP | 0.296 | 19 | 8  |
| --               | chr14 | 44155327 | G   | A  | --     | --    | IGR             | SNP | 0.324 | 25 | 12 |
| --               | chr14 | 44161543 | T   | G  | --     | --    | IGR             | SNP | 0.425 | 23 | 17 |
| --               | chr14 | 44295358 | C   | A  | --     | --    | IGR             | SNP | 0.300 | 21 | 9  |
| --               | chr14 | 44368250 | G   | T  | --     | --    | IGR             | SNP | 0.414 | 17 | 12 |
| --               | chr14 | 44934747 | T   | C  | --     | --    | IGR             | SNP | 0.276 | 21 | 8  |
| <i>FANCM</i>     | chr14 | 45607847 | A   | T  | --     | --    | Intron          | SNP | 0.647 | 12 | 22 |
| <i>MIS18BP1</i>  | chr14 | 45687158 | C   | T  | --     | --    | Intron          | SNP | 0.278 | 26 | 10 |
| --               | chr14 | 45981608 | CAT | -  | --     | --    | IGR             | DEL | 0.143 | 18 | 3  |
| --               | chr14 | 46356364 | T   | A  | --     | --    | IGR             | SNP | 0.286 | 10 | 4  |
| --               | chr14 | 46356380 | CTT | -  | --     | --    | IGR             | DEL | 0.286 | 10 | 4  |
| --               | chr14 | 46570531 | C   | A  | --     | --    | IGR             | SNP | 0.333 | 30 | 15 |
| --               | chr14 | 46668815 | CAT | -  | --     | --    | IGR             | DEL | 0.130 | 20 | 3  |
| --               | chr14 | 46693750 | C   | T  | --     | --    | IGR             | SNP | 0.316 | 13 | 6  |
| --               | chr14 | 46695903 | T   | C  | --     | --    | IGR             | SNP | 0.313 | 11 | 5  |
| --               | chr14 | 46762309 | C   | G  | --     | --    | IGR             | SNP | 0.500 | 23 | 23 |
| --               | chr14 | 46835756 | -   | TA | --     | --    | IGR             | INS | 0.185 | 22 | 5  |
| --               | chr14 | 46882817 | C   | G  | --     | --    | IGR             | SNP | 0.211 | 30 | 8  |
| --               | chr14 | 47076021 | G   | A  | --     | --    | IGR             | SNP | 0.286 | 20 | 8  |
| --               | chr14 | 47245102 | T   | A  | --     | --    | IGR             | SNP | 0.643 | 15 | 27 |
| --               | chr14 | 47277097 | -   | TC | --     | --    | IGR             | INS | 0.111 | 16 | 2  |
| <i>MDGA2</i>     | chr14 | 47578235 | C   | A  | --     | --    | Intron          | SNP | 0.216 | 29 | 8  |
| <i>MDGA2</i>     | chr14 | 47746468 | A   | C  | --     | --    | Intron          | SNP | 0.205 | 35 | 9  |
| <i>MDGA2</i>     | chr14 | 47814927 | C   | G  | --     | --    | Intron          | SNP | 0.225 | 31 | 9  |
| <i>MDGA2</i>     | chr14 | 47830414 | A   | C  | --     | --    | Intron          | SNP | 0.154 | 22 | 4  |
| <i>MDGA2</i>     | chr14 | 47885552 | A   | G  | --     | --    | Intron          | SNP | 0.218 | 43 | 12 |
| <i>MDGA2</i>     | chr14 | 48073430 | C   | T  | --     | --    | Intron          | SNP | 0.379 | 18 | 11 |
| <i>MDGA2</i>     | chr14 | 48102615 | A   | T  | --     | --    | Intron          | SNP | 0.538 | 18 | 21 |
| <i>MDGA2</i>     | chr14 | 48116925 | T   | G  | --     | --    | Intron          | SNP | 0.613 | 12 | 19 |
| <i>MDGA2</i>     | chr14 | 48136656 | G   | T  | --     | --    | Intron          | SNP | 0.417 | 21 | 15 |
| --               | chr14 | 48281300 | C   | T  | --     | --    | IGR             | SNP | 0.581 | 13 | 18 |
| --               | chr14 | 48526004 | AAG | -  | --     | --    | IGR             | DEL | 0.217 | 18 | 5  |
| --               | chr14 | 48559603 | C   | A  | --     | --    | IGR             | SNP | 0.214 | 22 | 6  |
| --               | chr14 | 48700782 | G   | T  | --     | --    | IGR             | SNP | 0.130 | 20 | 3  |
| --               | chr14 | 48817044 | C   | A  | --     | --    | IGR             | SNP | 0.148 | 23 | 4  |
| --               | chr14 | 48994021 | A   | T  | --     | --    | IGR             | SNP | 0.308 | 27 | 12 |
| --               | chr14 | 49196957 | A   | C  | --     | --    | IGR             | SNP | 0.250 | 12 | 4  |
| --               | chr14 | 49218792 | C   | G  | --     | --    | IGR             | SNP | 0.122 | 36 | 5  |
| --               | chr14 | 49678910 | C   | T  | --     | --    | IGR             | SNP | 0.424 | 19 | 14 |
| --               | chr14 | 49687909 | G   | C  | --     | --    | IGR             | SNP | 0.571 | 18 | 24 |
| --               | chr14 | 49778666 | C   | A  | --     | --    | IGR             | SNP | 0.271 | 35 | 13 |
| --               | chr14 | 49915243 | C   | T  | --     | --    | IGR             | SNP | 0.395 | 26 | 17 |
| <i>KLHDC1</i>    | chr14 | 50178622 | C   | T  | --     | --    | Intron          | SNP | 0.211 | 15 | 4  |
| <i>C14orf182</i> | chr14 | 50462958 | C   | A  | --     | --    | Intron          | SNP | 0.309 | 38 | 17 |
| <i>SOS2</i>      | chr14 | 50605398 | C   | T  | G2890A | E964K | Missense_mutati | SNP | 0.280 | 18 | 7  |
| <i>TRIM9</i>     | chr14 | 51513065 | C   | A  | --     | --    | Intron          | SNP | 0.793 | 6  | 23 |
| <i>TRIM9</i>     | chr14 | 51555393 | C   | A  | --     | --    | Intron          | SNP | 0.276 | 21 | 8  |
| <i>TRIM9</i>     | chr14 | 51555394 | T   | A  | --     | --    | Intron          | SNP | 0.276 | 21 | 8  |
| --               | chr14 | 51613336 | T   | A  | --     | --    | IGR             | SNP | 0.207 | 46 | 12 |
| --               | chr14 | 51660212 | G   | T  | --     | --    | IGR             | SNP | 0.195 | 33 | 8  |
| --               | chr14 | 51776664 | C   | T  | --     | --    | IGR             | SNP | 0.333 | 30 | 15 |

|                 |       |          |   |     |                         |                 |        |       |       |    |    |
|-----------------|-------|----------|---|-----|-------------------------|-----------------|--------|-------|-------|----|----|
| --              | chr14 | 51833757 | C | G   | --                      | --              | IGR    | SNP   | 0.200 | 28 | 7  |
| --              | chr14 | 51935746 | C | T   | --                      | --              | IGR    | SNP   | 0.282 | 28 | 11 |
| <i>C14orf82</i> | chr14 | 52117748 | A | C   | --                      | --              | RNA    | SNP   | 0.114 | 31 | 4  |
| --              | chr14 | 52202039 | C | T   | --                      | --              | IGR    | SNP   | 0.216 | 29 | 8  |
| <i>GNG2</i>     | chr14 | 52367519 | C | T   | --                      | --              | Intron | SNP   | 0.233 | 33 | 10 |
| <i>GNG2</i>     | chr14 | 52436443 | G | T   | --                      | --              | 3'UTR  | SNP   | 0.343 | 23 | 12 |
| --              | chr14 | 52591171 | G | C   | --                      | --              | IGR    | SNP   | 0.645 | 11 | 20 |
| <i>TXNDC16</i>  | chr14 | 52995549 | - | GTA | --                      | --              | Intron | INS   | 0.143 | 12 | 2  |
| --              | chr14 | 53314432 | G | T   | --                      | --              | IGR    | SNP   | 0.556 | 8  | 10 |
| --              | chr14 | 53495262 | T | A   | --                      | --              | IGR    | SNP   | 0.109 | 49 | 6  |
| --              | chr14 | 53783818 | C | G   | --                      | --              | IGR    | SNP   | 0.170 | 44 | 9  |
| --              | chr14 | 53895366 | A | C   | --                      | --              | IGR    | SNP   | 0.250 | 9  | 3  |
| --              | chr14 | 53922192 | T | C   | --                      | --              | IGR    | SNP   | 0.433 | 17 | 13 |
| --              | chr14 | 53969560 | C | T   | --                      | --              | IGR    | SNP   | 0.152 | 28 | 5  |
| --              | chr14 | 53969597 | T | C   | --                      | --              | IGR    | SNP   | 0.100 | 27 | 3  |
| --              | chr14 | 54059839 | G | T   | --                      | --              | IGR    | SNP   | 0.589 | 23 | 33 |
| --              | chr14 | 54096574 | T | A   | --                      | --              | IGR    | SNP   | 0.217 | 18 | 5  |
| --              | chr14 | 54320655 | G | T   | --                      | --              | IGR    | SNP   | 0.209 | 34 | 9  |
| --              | chr14 | 54708231 | G | A   | --                      | --              | IGR    | SNP   | 0.191 | 38 | 9  |
| --              | chr14 | 54777339 | C | G   | --                      | --              | IGR    | SNP   | 0.244 | 34 | 11 |
| --              | chr14 | 54818658 | C | G   | --                      | --              | IGR    | SNP   | 0.444 | 10 | 8  |
| --              | chr14 | 55292448 | T | C   | --                      | --              | IGR    | SNP   | 0.273 | 16 | 6  |
| <i>DLGAP5</i>   | chr14 | 55646266 | C | G   | --                      | --              | Intron | SNP   | 0.263 | 28 | 10 |
| --              | chr14 | 56019837 | T | A   | --                      | --              | IGR    | SNP   | 0.162 | 31 | 6  |
| --              | chr14 | 56362798 | C | A   | --                      | --              | IGR    | SNP   | 0.233 | 23 | 7  |
| <i>PELI2</i>    | chr14 | 56598257 | A | G   | --                      | --              | Intron | SNP   | 0.204 | 39 | 10 |
| <i>PELI2</i>    | chr14 | 56598258 | G | T   | --                      | --              | Intron | SNP   | 0.208 | 38 | 10 |
| --              | chr14 | 56882015 | G | C   | --                      | --              | IGR    | SNP   | 0.657 | 12 | 23 |
| --              | chr14 | 56900965 | G | A   | --                      | --              | IGR    | SNP   | 0.355 | 20 | 11 |
| <i>OTX2OS1</i>  | chr14 | 57377954 | G | A   | --                      | --              | RNA    | SNP   | 0.519 | 13 | 14 |
| --              | chr14 | 57498667 | C | T   | --                      | --              | IGR    | SNP   | 0.400 | 30 | 20 |
| --              | chr14 | 57634150 | A | G   | --                      | --              | IGR    | SNP   | 0.588 | 7  | 10 |
| <i>SLC35F4</i>  | chr14 | 58173068 | G | T   | --                      | --              | Intron | SNP   | 0.400 | 24 | 16 |
| <i>SLC35F4</i>  | chr14 | 58217401 | G | C   | --                      | --              | Intron | SNP   | 0.333 | 28 | 14 |
| <i>TOMM20L</i>  | chr14 | 58871704 | G | T   | --                      | --              | Intron | SNP   | 0.222 | 14 | 4  |
| --              | chr14 | 59440921 | C | A   | --                      | --              | IGR    | SNP   | 0.143 | 24 | 4  |
| --              | chr14 | 59472288 | C | G   | --                      | --              | IGR    | SNP   | 0.111 | 40 | 5  |
| --              | chr14 | 59526056 | C | T   | --                      | --              | IGR    | SNP   | 0.200 | 20 | 5  |
| <i>DAAM1</i>    | chr14 | 59821729 | G | A   | --                      | --              | Intron | SNP   | 0.426 | 31 | 23 |
| <i>C14orf38</i> | chr14 | 60003509 | T | G   | --                      | --              | Intron | SNP   | 0.132 | 33 | 5  |
| <i>RTN1</i>     | chr14 | 60232643 | G | C   | --                      | --              | Intron | SNP   | 0.548 | 14 | 17 |
| --              | chr14 | 60798439 | C | G   | --                      | --              | IGR    | SNP   | 0.250 | 27 | 9  |
| <i>C14orf39</i> | chr14 | 60926702 | G | A   | --                      | --              | Intron | SNP   | 0.565 | 10 | 13 |
| --              | chr14 | 60963264 | G | C   | --                      | --              | IGR    | SNP   | 0.660 | 18 | 35 |
| <i>SLC38A6</i>  | chr14 | 61507780 | G | C   | --                      | --              | Intron | SNP   | 0.698 | 16 | 37 |
| <i>SLC38A6</i>  | chr14 | 61507816 | G | C   | --                      | --              | Intron | SNP   | 0.644 | 16 | 29 |
| <i>SLC38A6</i>  | chr14 | 61508062 | G | C   | --                      | --              | Intron | SNP   | 0.611 | 14 | 22 |
| <i>SLC38A6</i>  | chr14 | 61508145 | G | C   | --                      | --              | Intron | SNP   | 0.615 | 15 | 24 |
| <i>SLC38A6</i>  | chr14 | 61542551 | A | G   | --                      | --              | Intron | SNP   | 0.158 | 16 | 3  |
| --              | chr14 | 61597034 | C | T   | --                      | --              | IGR    | SNP   | 0.306 | 43 | 19 |
| --              | chr14 | 61720400 | T | A   | --                      | --              | IGR    | SNP   | 0.281 | 46 | 18 |
| <i>FLJ22447</i> | chr14 | 62062676 | G | T   | --                      | --              | RNA    | SNP   | 0.273 | 8  | 3  |
| --              | chr14 | 62303973 | G | T   | --                      | --              | IGR    | SNP   | 0.211 | 15 | 4  |
| <i>SYT16</i>    | chr14 | 62480360 | C | A   | --                      | --              | Intron | SNP   | 0.266 | 47 | 17 |
| --              | chr14 | 62640194 | T | G   | --                      | --              | IGR    | SNP   | 0.471 | 18 | 16 |
| --              | chr14 | 62657544 | A | C   | --                      | --              | IGR    | SNP   | 0.239 | 35 | 11 |
| --              | chr14 | 62754666 | G | A   | --                      | --              | IGR    | SNP   | 0.385 | 8  | 5  |
| --              | chr14 | 62754672 | A | G   | --                      | --              | IGR    | SNP   | 0.385 | 8  | 5  |
| --              | chr14 | 62976700 | G | C   | --                      | --              | IGR    | SNP   | 0.207 | 23 | 6  |
| --              | chr14 | 62999033 | G | A   | --                      | --              | IGR    | SNP   | 0.282 | 28 | 11 |
| --              | chr14 | 63128645 | C | G   | --                      | --              | IGR    | SNP   | 0.306 | 25 | 11 |
| <i>KCNH5</i>    | chr14 | 63269091 | C | T   | G1778A,G160 G593E,G535E | Missense_mutati | SNP    | 0.224 | 38    | 11 |    |
| <i>KCNH5</i>    | chr14 | 63282978 | G | T   | --                      | --              | Intron | SNP   | 0.231 | 30 | 9  |
| <i>KCNH5</i>    | chr14 | 63389588 | C | T   | --                      | --              | Intron | SNP   | 0.356 | 29 | 16 |
| <i>KCNH5</i>    | chr14 | 63447129 | G | A   | --                      | --              | Intron | SNP   | 0.175 | 33 | 7  |
| <i>KCNH5</i>    | chr14 | 63480119 | C | T   | --                      | --              | Intron | SNP   | 0.368 | 24 | 14 |
| <i>KCNH5</i>    | chr14 | 63522519 | A | C   | --                      | --              | Intron | SNP   | 0.359 | 25 | 14 |
| <i>PPP2R5E</i>  | chr14 | 63907232 | T | G   | --                      | --              | Intron | SNP   | 0.371 | 22 | 13 |
| --              | chr14 | 64286418 | C | G   | --                      | --              | IGR    | SNP   | 0.179 | 23 | 5  |
| <i>SYNE2</i>    | chr14 | 64401782 | C | G   | --                      | --              | Intron | SNP   | 0.298 | 33 | 14 |
| <i>SYNE2</i>    | chr14 | 64402813 | G | A   | --                      | --              | Intron | SNP   | 0.196 | 37 | 9  |
| <i>SPTB</i>     | chr14 | 65287948 | A | C   | --                      | --              | Intron | SNP   | 0.623 | 20 | 33 |
| --              | chr14 | 65761954 | G | A   | --                      | --              | IGR    | SNP   | 0.294 | 36 | 15 |
| <i>FUT8</i>     | chr14 | 65896579 | C | A   | --                      | --              | Intron | SNP   | 0.286 | 10 | 4  |
| <i>FUT8</i>     | chr14 | 65980286 | C | G   | --                      | --              | Intron | SNP   | 0.410 | 23 | 16 |
| <i>FUT8</i>     | chr14 | 65980944 | C | T   | --                      | --              | Intron | SNP   | 0.340 | 33 | 17 |
| <i>FUT8</i>     | chr14 | 66100782 | A | G   | --                      | --              | Intron | SNP   | 0.333 | 12 | 6  |
| <i>FUT8</i>     | chr14 | 66100802 | C | T   | --                      | --              | Intron | SNP   | 0.357 | 9  | 5  |
| --              | chr14 | 66340361 | C | T   | --                      | --              | IGR    | SNP   | 0.400 | 18 | 12 |
| --              | chr14 | 66349788 | C | T   | --                      | --              | IGR    | SNP   | 0.414 | 17 | 12 |

|              |       |          |       |    |       |       |                 |     |       |    |    |
|--------------|-------|----------|-------|----|-------|-------|-----------------|-----|-------|----|----|
| --           | chr14 | 66605605 | A     | G  | --    | --    | IGR             | SNP | 0.237 | 29 | 9  |
| GPHN         | chr14 | 67011732 | C     | T  | --    | --    | Intron          | SNP | 0.333 | 20 | 10 |
| GPHN         | chr14 | 67226535 | G     | T  | --    | --    | Intron          | SNP | 0.265 | 25 | 9  |
| GPHN         | chr14 | 67399161 | G     | T  | --    | --    | Intron          | SNP | 0.267 | 11 | 4  |
| GPHN         | chr14 | 67531030 | T     | C  | --    | --    | Intron          | SNP | 0.190 | 17 | 4  |
| GPHN         | chr14 | 67552786 | C     | T  | --    | --    | Intron          | SNP | 0.260 | 37 | 13 |
| GPHN         | chr14 | 67631649 | T     | A  | --    | --    | Intron          | SNP | 0.273 | 24 | 9  |
| MPP5         | chr14 | 67707610 | A     | C  | --    | --    | 5'Flank         | SNP | 0.306 | 34 | 15 |
| ARG2         | chr14 | 68102989 | A     | C  | --    | --    | Intron          | SNP | 0.390 | 25 | 16 |
| RAD51B       | chr14 | 68288655 | G     | A  | --    | --    | Intron          | SNP | 0.512 | 20 | 21 |
| RAD51B       | chr14 | 68702614 | T     | C  | --    | --    | Intron          | SNP | 0.333 | 26 | 13 |
| RAD51B       | chr14 | 68946406 | G     | T  | --    | --    | Intron          | SNP | 0.167 | 20 | 4  |
| RAD51B       | chr14 | 69022132 | C     | T  | --    | --    | Intron          | SNP | 0.369 | 41 | 24 |
| --           | chr14 | 69463940 | G     | A  | --    | --    | IGR             | SNP | 0.462 | 7  | 6  |
| DCAF5        | chr14 | 69539713 | A     | T  | --    | --    | Intron          | SNP | 0.226 | 41 | 12 |
| --           | chr14 | 69831277 | C     | T  | --    | --    | IGR             | SNP | 0.364 | 28 | 16 |
| --           | chr14 | 69942974 | C     | A  | --    | --    | IGR             | SNP | 0.211 | 15 | 4  |
| PLEKHD1      | chr14 | 69985130 | C     | G  | --    | --    | Intron          | SNP | 0.256 | 32 | 11 |
| --           | chr14 | 70301850 | A     | T  | --    | --    | IGR             | SNP | 0.355 | 20 | 11 |
| --           | chr14 | 70310972 | T     | A  | --    | --    | IGR             | SNP | 0.333 | 14 | 7  |
| SMOC1        | chr14 | 70379667 | G     | T  | --    | --    | Intron          | SNP | 0.229 | 27 | 8  |
| SLC8A3       | chr14 | 70637173 | A     | G  | --    | --    | Intron          | SNP | 0.191 | 38 | 9  |
| SLC8A3       | chr14 | 70654357 | T     | C  | --    | --    | Intron          | SNP | 0.138 | 25 | 4  |
| --           | chr14 | 70668158 | G     | A  | --    | --    | IGR             | SNP | 0.514 | 17 | 18 |
| --           | chr14 | 70789193 | C     | T  | --    | --    | IGR             | SNP | 0.414 | 17 | 12 |
| COX16, SYNJ1 | chr14 | 70802340 | C     | A  | --    | --    | Intron          | SNP | 0.188 | 26 | 6  |
| --           | chr14 | 70902777 | G     | A  | --    | --    | IGR             | SNP | 0.205 | 31 | 8  |
| C14orf55     | chr14 | 70946283 | G     | T  | --    | --    | RNA             | SNP | 0.389 | 11 | 7  |
| --           | chr14 | 71181601 | A     | C  | --    | --    | IGR             | SNP | 0.282 | 28 | 11 |
| --           | chr14 | 71328861 | A     | G  | --    | --    | IGR             | SNP | 0.133 | 26 | 4  |
| --           | chr14 | 71328865 | A     | G  | --    | --    | IGR             | SNP | 0.107 | 25 | 3  |
| PCNX         | chr14 | 71523732 | A     | T  | --    | --    | Intron          | SNP | 0.286 | 25 | 10 |
| PCNX         | chr14 | 71525048 | C     | T  | --    | --    | Intron          | SNP | 0.242 | 25 | 8  |
| --           | chr14 | 71842483 | T     | G  | --    | --    | IGR             | SNP | 0.273 | 24 | 9  |
| --           | chr14 | 71845319 | A     | T  | --    | --    | IGR             | SNP | 0.326 | 29 | 14 |
| --           | chr14 | 72395849 | C     | A  | --    | --    | IGR             | SNP | 0.300 | 21 | 9  |
| RGS6         | chr14 | 72488373 | G     | C  | --    | --    | Intron          | SNP | 0.548 | 14 | 17 |
| RGS6         | chr14 | 72501427 | T     | G  | --    | --    | Intron          | SNP | 0.615 | 10 | 16 |
| RGS6         | chr14 | 72699162 | C     | A  | --    | --    | Intron          | SNP | 0.106 | 42 | 5  |
| --           | chr14 | 73071478 | G     | T  | --    | --    | IGR             | SNP | 0.370 | 34 | 20 |
| --           | chr14 | 73100174 | A     | C  | --    | --    | IGR             | SNP | 0.509 | 26 | 27 |
| DPF3         | chr14 | 73143729 | G     | C  | --    | --    | Intron          | SNP | 0.280 | 36 | 14 |
| ZFYVE1       | chr14 | 73453270 | C     | T  | --    | --    | Intron          | SNP | 0.227 | 17 | 5  |
| ZFYVE1       | chr14 | 73453271 | C     | T  | --    | --    | Intron          | SNP | 0.227 | 17 | 5  |
| RBM25        | chr14 | 73557830 | C     | G  | --    | --    | Intron          | SNP | 0.396 | 32 | 21 |
| RBM25        | chr14 | 73568219 | GTGTA | -  | --    | --    | Intron          | DEL | 0.143 | 18 | 3  |
| NUMB         | chr14 | 73752591 | G     | A  | --    | --    | Intron          | SNP | 0.303 | 23 | 10 |
| NUMB         | chr14 | 73875605 | G     | A  | --    | --    | Intron          | SNP | 0.357 | 9  | 5  |
| --           | chr14 | 74279008 | T     | C  | --    | --    | IGR             | SNP | 0.275 | 29 | 11 |
| --           | chr14 | 74302771 | A     | T  | --    | --    | IGR             | SNP | 0.368 | 12 | 7  |
| LIN52        | chr14 | 74617955 | A     | T  | --    | --    | Intron          | SNP | 0.529 | 16 | 18 |
| VSX2         | chr14 | 74720357 | G     | T  | --    | --    | Intron          | SNP | 0.328 | 39 | 19 |
| VSX2         | chr14 | 74725542 | C     | T  | --    | --    | Intron          | SNP | 0.128 | 34 | 5  |
| LTBP2        | chr14 | 75060666 | G     | A  | --    | --    | Intron          | SNP | 0.455 | 18 | 15 |
| --           | chr14 | 75887926 | C     | G  | --    | --    | IGR             | SNP | 0.407 | 32 | 22 |
| TTLL5        | chr14 | 76332727 | T     | A  | --    | --    | Intron          | SNP | 0.174 | 38 | 8  |
| --           | chr14 | 76739752 | G     | A  | --    | --    | IGR             | SNP | 0.263 | 28 | 10 |
| ESRRB        | chr14 | 76916103 | C     | T  | --    | --    | Intron          | SNP | 0.238 | 16 | 5  |
| --           | chr14 | 77092828 | G     | C  | --    | --    | IGR             | SNP | 0.608 | 20 | 31 |
| --           | chr14 | 77175045 | C     | T  | --    | --    | IGR             | SNP | 0.395 | 26 | 17 |
| C14orf166B   | chr14 | 77323158 | G     | C  | --    | --    | Intron          | SNP | 0.275 | 58 | 22 |
| --           | chr14 | 77386869 | C     | T  | --    | --    | IGR             | SNP | 0.333 | 40 | 20 |
| --           | chr14 | 77516698 | G     | A  | --    | --    | IGR             | SNP | 0.313 | 22 | 10 |
| --           | chr14 | 77586772 | G     | T  | --    | --    | IGR             | SNP | 0.182 | 18 | 4  |
| TMEM63C      | chr14 | 77648967 | C     | G  | --    | --    | Intron          | SNP | 0.174 | 38 | 8  |
| ALKBH1       | chr14 | 78146263 | C     | T  | G506A | R169H | Missense_mutati | SNP | 0.549 | 23 | 28 |
| --           | chr14 | 78432445 | -     | AG | --    | --    | IGR             | INS | 0.415 | 24 | 17 |
| --           | chr14 | 78455371 | T     | G  | --    | --    | IGR             | SNP | 0.298 | 33 | 14 |
| --           | chr14 | 78543526 | T     | C  | --    | --    | IGR             | SNP | 0.279 | 31 | 12 |
| --           | chr14 | 78566026 | C     | T  | --    | --    | IGR             | SNP | 0.563 | 21 | 27 |
| --           | chr14 | 78585439 | G     | C  | --    | --    | IGR             | SNP | 0.318 | 30 | 14 |
| --           | chr14 | 78666038 | T     | A  | --    | --    | IGR             | SNP | 0.167 | 40 | 8  |
| --           | chr14 | 78863995 | G     | A  | --    | --    | IGR             | SNP | 0.308 | 27 | 12 |
| --           | chr14 | 78867335 | C     | A  | --    | --    | IGR             | SNP | 0.615 | 10 | 16 |
| NRXN3        | chr14 | 78895575 | CAT   | -  | --    | --    | Intron          | DEL | 0.176 | 14 | 3  |
| NRXN3        | chr14 | 78906601 | C     | A  | --    | --    | Intron          | SNP | 0.231 | 40 | 12 |
| NRXN3        | chr14 | 79164948 | G     | C  | --    | --    | Intron          | SNP | 0.600 | 18 | 27 |
| NRXN3        | chr14 | 79167582 | A     | T  | --    | --    | Intron          | SNP | 0.116 | 38 | 5  |
| NRXN3        | chr14 | 79272269 | A     | T  | --    | --    | Intron          | SNP | 0.297 | 26 | 11 |
| NRXN3        | chr14 | 79276733 | AC    | -  | --    | --    | Intron          | DEL | 0.136 | 19 | 3  |

|             |       |          |      |       |       |       |        |     |       |    |    |
|-------------|-------|----------|------|-------|-------|-------|--------|-----|-------|----|----|
| NRXN3       | chr14 | 79290446 | C    | T     | --    | --    | Intron | SNP | 0.400 | 6  | 4  |
| NRXN3       | chr14 | 79343804 | C    | A     | --    | --    | Intron | SNP | 0.609 | 18 | 28 |
| NRXN3       | chr14 | 79375515 | C    | A     | --    | --    | Intron | SNP | 0.306 | 34 | 15 |
| NRXN3       | chr14 | 79457588 | G    | C     | --    | --    | Intron | SNP | 0.104 | 43 | 5  |
| NRXN3       | chr14 | 80133932 | C    | G     | --    | --    | Intron | SNP | 0.347 | 32 | 17 |
| --          | chr14 | 80477792 | CT   | -     | --    | --    | IGR    | DEL | 0.250 | 18 | 6  |
| --          | chr14 | 80606108 | C    | A     | --    | --    | IGR    | SNP | 0.205 | 31 | 8  |
| LOC1006283C | chr14 | 80715024 | T    | A     | --    | --    | RNA    | SNP | 0.125 | 21 | 3  |
| LOC1006283C | chr14 | 80715037 | T    | G     | --    | --    | RNA    | SNP | 0.130 | 20 | 3  |
| LOC1006283C | chr14 | 80715069 | TA   | -     | --    | --    | RNA    | DEL | 0.111 | 24 | 3  |
| --          | chr14 | 80937989 | C    | T     | --    | --    | IGR    | SNP | 0.300 | 21 | 9  |
| CEP128      | chr14 | 80997246 | T    | G     | --    | --    | Intron | SNP | 0.441 | 19 | 15 |
| CEP128      | chr14 | 81177687 | C    | G     | --    | --    | Intron | SNP | 0.188 | 26 | 6  |
| STON2       | chr14 | 81814076 | CCCT | -     | --    | --    | Intron | DEL | 0.231 | 20 | 6  |
| --          | chr14 | 81885905 | G    | T     | --    | --    | IGR    | SNP | 0.647 | 18 | 33 |
| --          | chr14 | 81916872 | G    | A     | --    | --    | IGR    | SNP | 0.255 | 38 | 13 |
| --          | chr14 | 82015532 | C    | G     | --    | --    | IGR    | SNP | 0.583 | 5  | 7  |
| --          | chr14 | 82069956 | C    | G     | --    | --    | IGR    | SNP | 0.234 | 36 | 11 |
| --          | chr14 | 82406841 | T    | A     | --    | --    | IGR    | SNP | 0.209 | 34 | 9  |
| --          | chr14 | 82609306 | T    | G     | --    | --    | IGR    | SNP | 0.311 | 42 | 19 |
| --          | chr14 | 82640212 | G    | T     | --    | --    | IGR    | SNP | 0.318 | 30 | 14 |
| --          | chr14 | 82669028 | A    | T     | --    | --    | IGR    | SNP | 0.235 | 26 | 8  |
| --          | chr14 | 82673709 | C    | G     | --    | --    | IGR    | SNP | 0.480 | 13 | 12 |
| --          | chr14 | 82783204 | A    | C     | --    | --    | IGR    | SNP | 0.333 | 24 | 12 |
| --          | chr14 | 82945506 | A    | G     | --    | --    | IGR    | SNP | 0.433 | 17 | 13 |
| --          | chr14 | 82996484 | A    | T     | --    | --    | IGR    | SNP | 0.576 | 14 | 19 |
| --          | chr14 | 83107612 | C    | T     | --    | --    | IGR    | SNP | 0.515 | 16 | 17 |
| --          | chr14 | 83370228 | C    | A     | --    | --    | IGR    | SNP | 0.243 | 28 | 9  |
| --          | chr14 | 83890266 | T    | C     | --    | --    | IGR    | SNP | 0.318 | 30 | 14 |
| --          | chr14 | 83992347 | G    | T     | --    | --    | IGR    | SNP | 0.321 | 19 | 9  |
| --          | chr14 | 83995857 | A    | C     | --    | --    | IGR    | SNP | 0.308 | 27 | 12 |
| --          | chr14 | 84098587 | A    | T     | --    | --    | IGR    | SNP | 0.353 | 22 | 12 |
| --          | chr14 | 84099742 | A    | C     | --    | --    | IGR    | SNP | 0.351 | 24 | 13 |
| --          | chr14 | 84154114 | G    | A     | --    | --    | IGR    | SNP | 0.306 | 25 | 11 |
| --          | chr14 | 84402624 | GA   | -     | --    | --    | IGR    | DEL | 0.171 | 29 | 6  |
| --          | chr14 | 84648946 | C    | T     | --    | --    | IGR    | SNP | 0.353 | 11 | 6  |
| --          | chr14 | 84684094 | C    | T     | --    | --    | IGR    | SNP | 0.623 | 20 | 33 |
| --          | chr14 | 84858980 | G    | C     | --    | --    | IGR    | SNP | 0.522 | 22 | 24 |
| --          | chr14 | 85085058 | C    | A     | --    | --    | IGR    | SNP | 0.282 | 28 | 11 |
| --          | chr14 | 85507643 | C    | A     | --    | --    | IGR    | SNP | 0.294 | 36 | 15 |
| --          | chr14 | 85621608 | A    | T     | --    | --    | IGR    | SNP | 0.185 | 22 | 5  |
| --          | chr14 | 85621609 | A    | T     | --    | --    | IGR    | SNP | 0.143 | 24 | 4  |
| --          | chr14 | 85666705 | C    | T     | --    | --    | IGR    | SNP | 0.244 | 31 | 10 |
| FLRT2       | chr14 | 86062946 | A    | C     | --    | --    | Intron | SNP | 0.300 | 28 | 12 |
| FLRT2       | chr14 | 86088200 | C    | G     | C342G | L114L | Silent | SNP | 0.395 | 26 | 17 |
| --          | chr14 | 86268730 | A    | T     | --    | --    | IGR    | SNP | 0.219 | 25 | 7  |
| --          | chr14 | 86681532 | G    | C     | --    | --    | IGR    | SNP | 0.286 | 20 | 8  |
| --          | chr14 | 86861139 | T    | C     | --    | --    | IGR    | SNP | 0.565 | 10 | 13 |
| --          | chr14 | 86957173 | GCA  | -     | --    | --    | IGR    | DEL | 0.108 | 33 | 4  |
| --          | chr14 | 86963030 | G    | T     | --    | --    | IGR    | SNP | 0.378 | 28 | 17 |
| --          | chr14 | 87060679 | T    | C     | --    | --    | IGR    | SNP | 0.286 | 5  | 2  |
| --          | chr14 | 87145186 | G    | C     | --    | --    | IGR    | SNP | 0.216 | 29 | 8  |
| --          | chr14 | 87183584 | A    | C     | --    | --    | IGR    | SNP | 0.465 | 23 | 20 |
| LOC283585   | chr14 | 87379817 | C    | G     | --    | --    | RNA    | SNP | 0.686 | 11 | 24 |
| --          | chr14 | 87696905 | A    | G     | --    | --    | IGR    | SNP | 0.250 | 39 | 13 |
| --          | chr14 | 87701995 | C    | T     | --    | --    | IGR    | SNP | 0.103 | 26 | 3  |
| --          | chr14 | 87702078 | A    | G     | --    | --    | IGR    | SNP | 0.114 | 39 | 5  |
| --          | chr14 | 87890677 | A    | G     | --    | --    | IGR    | SNP | 0.273 | 16 | 6  |
| --          | chr14 | 87936613 | C    | A     | --    | --    | IGR    | SNP | 0.220 | 32 | 9  |
| --          | chr14 | 87949470 | A    | C     | --    | --    | IGR    | SNP | 0.556 | 16 | 20 |
| --          | chr14 | 88195071 | G    | A     | --    | --    | IGR    | SNP | 0.231 | 20 | 6  |
| --          | chr14 | 88209780 | C    | A     | --    | --    | IGR    | SNP | 0.571 | 24 | 32 |
| --          | chr14 | 88293993 | G    | A     | --    | --    | IGR    | SNP | 0.273 | 24 | 9  |
| --          | chr14 | 88382635 | C    | T     | --    | --    | IGR    | SNP | 0.347 | 47 | 25 |
| GPR65       | chr14 | 88479748 | C    | T     | --    | --    | 3'UTR  | SNP | 0.386 | 27 | 17 |
| --          | chr14 | 88527587 | C    | A     | --    | --    | IGR    | SNP | 0.152 | 28 | 5  |
| --          | chr14 | 88537200 | C    | T     | --    | --    | IGR    | SNP | 0.613 | 12 | 19 |
| --          | chr14 | 88555224 | C    | A     | --    | --    | IGR    | SNP | 0.265 | 36 | 13 |
| --          | chr14 | 88602395 | C    | T     | --    | --    | IGR    | SNP | 0.303 | 23 | 10 |
| --          | chr14 | 88629320 | G    | T     | --    | --    | IGR    | SNP | 0.333 | 38 | 19 |
| --          | chr14 | 88645277 | G    | A     | --    | --    | IGR    | SNP | 0.100 | 27 | 3  |
| KCNK10      | chr14 | 88763011 | C    | T     | --    | --    | Intron | SNP | 0.357 | 36 | 20 |
| SPATA7      | chr14 | 88875060 | T    | C     | --    | --    | Intron | SNP | 0.222 | 21 | 6  |
| SPATA7      | chr14 | 88875075 | A    | G     | --    | --    | Intron | SNP | 0.231 | 20 | 6  |
| --          | chr14 | 88925825 | -    | CTTCT | --    | --    | IGR    | INS | 0.179 | 23 | 5  |
| ZC3H14      | chr14 | 89059331 | G    | T     | --    | --    | Intron | SNP | 0.417 | 7  | 5  |
| --          | chr14 | 89569217 | T    | C     | --    | --    | IGR    | SNP | 0.276 | 21 | 8  |
| --          | chr14 | 90220295 | G    | A     | --    | --    | IGR    | SNP | 0.320 | 34 | 16 |
| EFCAB11     | chr14 | 90268743 | T    | C     | --    | --    | Intron | SNP | 0.421 | 11 | 8  |
| KCNK13      | chr14 | 90637326 | C    | A     | --    | --    | Intron | SNP | 0.231 | 40 | 12 |

|           |       |           |     |    |    |    |         |     |       |    |    |
|-----------|-------|-----------|-----|----|----|----|---------|-----|-------|----|----|
| KCNK13    | chr14 | 90637327  | A   | C  | -- | -- | Intron  | SNP | 0.231 | 40 | 12 |
| C14orf102 | chr14 | 90782301  | C   | A  | -- | -- | Intron  | SNP | 0.222 | 14 | 4  |
| TTC7B     | chr14 | 91129542  | G   | C  | -- | -- | Intron  | SNP | 0.500 | 29 | 29 |
| --        | chr14 | 91989373  | TC  | -  | -- | -- | IGR     | DEL | 0.143 | 12 | 2  |
| --        | chr14 | 92433062  | A   | G  | -- | -- | IGR     | SNP | 0.303 | 23 | 10 |
| SLC24A4   | chr14 | 92802835  | T   | C  | -- | -- | Intron  | SNP | 0.364 | 35 | 20 |
| RIN3      | chr14 | 93081888  | T   | G  | -- | -- | Intron  | SNP | 0.224 | 38 | 11 |
| RIN3      | chr14 | 93081889  | G   | T  | -- | -- | Intron  | SNP | 0.224 | 38 | 11 |
| ITPK1     | chr14 | 93407657  | C   | G  | -- | -- | 3'UTR   | SNP | 0.407 | 35 | 24 |
| ITPK1     | chr14 | 93489481  | T   | A  | -- | -- | Intron  | SNP | 0.239 | 35 | 11 |
| UBR7      | chr14 | 93674826  | G   | A  | -- | -- | Intron  | SNP | 0.182 | 36 | 8  |
| --        | chr14 | 93700532  | A   | T  | -- | -- | IGR     | SNP | 0.182 | 18 | 4  |
| BTBD7     | chr14 | 93777137  | G   | T  | -- | -- | Intron  | SNP | 0.211 | 15 | 4  |
| UNC79     | chr14 | 94016860  | C   | A  | -- | -- | Intron  | SNP | 0.222 | 14 | 4  |
| C14orf86  | chr14 | 94388002  | G   | A  | -- | -- | RNA     | SNP | 0.647 | 18 | 33 |
| ASB2      | chr14 | 94436913  | C   | G  | -- | -- | Intron  | SNP | 0.342 | 52 | 27 |
| --        | chr14 | 94597107  | G   | C  | -- | -- | IGR     | SNP | 0.564 | 17 | 22 |
| --        | chr14 | 94597177  | G   | A  | -- | -- | IGR     | SNP | 0.571 | 15 | 20 |
| --        | chr14 | 94632557  | G   | C  | -- | -- | IGR     | SNP | 0.167 | 20 | 4  |
| PPP4R4    | chr14 | 94678454  | T   | C  | -- | -- | Intron  | SNP | 0.595 | 17 | 25 |
| PPP4R4    | chr14 | 94692332  | G   | A  | -- | -- | Intron  | SNP | 0.139 | 31 | 5  |
| SERPINA11 | chr14 | 94918991  | C   | G  | -- | -- | Intron  | SNP | 0.190 | 17 | 4  |
| --        | chr14 | 95070911  | G   | A  | -- | -- | IGR     | SNP | 0.316 | 26 | 12 |
| --        | chr14 | 95220542  | C   | A  | -- | -- | IGR     | SNP | 0.211 | 15 | 4  |
| --        | chr14 | 95305545  | C   | A  | -- | -- | IGR     | SNP | 0.267 | 33 | 12 |
| C14orf49  | chr14 | 95934547  | C   | T  | -- | -- | Intron  | SNP | 0.737 | 15 | 42 |
| --        | chr14 | 96207229  | C   | G  | -- | -- | IGR     | SNP | 0.238 | 32 | 10 |
| --        | chr14 | 96219962  | TTA | -  | -- | -- | IGR     | DEL | 0.107 | 25 | 3  |
| --        | chr14 | 96242736  | C   | T  | -- | -- | IGR     | SNP | 0.262 | 31 | 11 |
| --        | chr14 | 96857060  | T   | C  | -- | -- | IGR     | SNP | 0.686 | 16 | 35 |
| --        | chr14 | 97034790  | C   | G  | -- | -- | IGR     | SNP | 0.349 | 28 | 15 |
| --        | chr14 | 97226084  | A   | G  | -- | -- | IGR     | SNP | 0.565 | 20 | 26 |
| --        | chr14 | 97256483  | C   | A  | -- | -- | IGR     | SNP | 0.327 | 35 | 17 |
| VRK1      | chr14 | 97306881  | A   | T  | -- | -- | Intron  | SNP | 0.188 | 26 | 6  |
| --        | chr14 | 97698926  | C   | T  | -- | -- | IGR     | SNP | 0.296 | 38 | 16 |
| --        | chr14 | 98287084  | G   | A  | -- | -- | IGR     | SNP | 0.141 | 55 | 9  |
| C14orf64  | chr14 | 98419939  | -   | CT | -- | -- | RNA     | INS | 0.105 | 17 | 2  |
| --        | chr14 | 98518807  | G   | A  | -- | -- | IGR     | SNP | 0.625 | 15 | 25 |
| --        | chr14 | 98602218  | C   | A  | -- | -- | IGR     | SNP | 0.350 | 26 | 14 |
| --        | chr14 | 98872273  | G   | A  | -- | -- | IGR     | SNP | 0.702 | 14 | 33 |
| --        | chr14 | 98873811  | C   | A  | -- | -- | IGR     | SNP | 0.629 | 13 | 22 |
| --        | chr14 | 99215978  | C   | T  | -- | -- | IGR     | SNP | 0.467 | 24 | 21 |
| --        | chr14 | 99374590  | T   | G  | -- | -- | IGR     | SNP | 0.321 | 19 | 9  |
| --        | chr14 | 99570735  | T   | C  | -- | -- | IGR     | SNP | 0.244 | 31 | 10 |
| --        | chr14 | 99571727  | T   | G  | -- | -- | IGR     | SNP | 0.200 | 12 | 3  |
| --        | chr14 | 99832454  | G   | T  | -- | -- | IGR     | SNP | 0.400 | 6  | 4  |
| CCDC85C   | chr14 | 100030941 | G   | T  | -- | -- | Intron  | SNP | 0.350 | 26 | 14 |
| HHIPL1    | chr14 | 100130629 | T   | C  | -- | -- | Intron  | SNP | 0.256 | 32 | 11 |
| --        | chr14 | 100206486 | T   | C  | -- | -- | IGR     | SNP | 0.288 | 42 | 17 |
| --        | chr14 | 101189472 | A   | C  | -- | -- | IGR     | SNP | 0.364 | 14 | 8  |
| --        | chr14 | 101251119 | C   | A  | -- | -- | IGR     | SNP | 0.318 | 45 | 21 |
| --        | chr14 | 101383967 | C   | G  | -- | -- | IGR     | SNP | 0.189 | 30 | 7  |
| --        | chr14 | 101668869 | G   | A  | -- | -- | IGR     | SNP | 0.529 | 16 | 18 |
| --        | chr14 | 101669018 | G   | C  | -- | -- | IGR     | SNP | 0.617 | 18 | 29 |
| --        | chr14 | 101748508 | G   | A  | -- | -- | IGR     | SNP | 0.316 | 26 | 12 |
| --        | chr14 | 101914045 | G   | T  | -- | -- | IGR     | SNP | 0.182 | 18 | 4  |
| MOK       | chr14 | 102754614 | G   | A  | -- | -- | Intron  | SNP | 0.468 | 33 | 29 |
| --        | chr14 | 102782686 | C   | T  | -- | -- | IGR     | SNP | 0.433 | 17 | 13 |
| TECPR2    | chr14 | 102843427 | C   | G  | -- | -- | Intron  | SNP | 0.152 | 56 | 10 |
| TECPR2    | chr14 | 102947263 | C   | G  | -- | -- | Intron  | SNP | 0.450 | 11 | 9  |
| TRAF3     | chr14 | 103291858 | G   | C  | -- | -- | Intron  | SNP | 0.635 | 23 | 40 |
| CDC42BPB  | chr14 | 103504913 | G   | C  | -- | -- | Intron  | SNP | 0.676 | 11 | 23 |
| --        | chr14 | 103665491 | G   | C  | -- | -- | IGR     | SNP | 0.585 | 17 | 24 |
| --        | chr14 | 103665601 | G   | A  | -- | -- | IGR     | SNP | 0.806 | 7  | 29 |
| --        | chr14 | 103681335 | G   | C  | -- | -- | IGR     | SNP | 0.489 | 23 | 22 |
| --        | chr14 | 103780854 | C   | G  | -- | -- | IGR     | SNP | 0.204 | 39 | 10 |
| --        | chr14 | 103782084 | C   | A  | -- | -- | IGR     | SNP | 0.319 | 32 | 15 |
| --        | chr14 | 103782173 | C   | A  | -- | -- | IGR     | SNP | 0.333 | 30 | 15 |
| EIF5      | chr14 | 103811440 | G   | T  | -- | -- | 3'Flank | SNP | 0.203 | 55 | 14 |
| --        | chr14 | 103835135 | T   | A  | -- | -- | IGR     | SNP | 0.279 | 31 | 12 |
| --        | chr14 | 104063770 | G   | A  | -- | -- | IGR     | SNP | 0.214 | 11 | 3  |
| --        | chr14 | 104340338 | C   | T  | -- | -- | IGR     | SNP | 0.160 | 21 | 4  |
| TDRD9     | chr14 | 104395283 | C   | T  | -- | -- | Intron  | SNP | 0.174 | 19 | 4  |
| TDRD9     | chr14 | 104407578 | C   | A  | -- | -- | Intron  | SNP | 0.167 | 20 | 4  |
| TDRD9     | chr14 | 104448568 | A   | G  | -- | -- | Intron  | SNP | 0.156 | 38 | 7  |
| TDRD9     | chr14 | 104480580 | A   | T  | -- | -- | Intron  | SNP | 0.273 | 8  | 3  |
| --        | chr14 | 104764143 | C   | T  | -- | -- | IGR     | SNP | 0.200 | 28 | 7  |
| --        | chr14 | 104829650 | G   | A  | -- | -- | IGR     | SNP | 0.387 | 38 | 24 |
| --        | chr14 | 104907273 | AG  | -  | -- | -- | IGR     | DEL | 0.302 | 30 | 13 |
| --        | chr14 | 104935257 | T   | A  | -- | -- | IGR     | SNP | 0.222 | 21 | 6  |

|                  |       |           |       |       |    |    |         |     |       |     |    |
|------------------|-------|-----------|-------|-------|----|----|---------|-----|-------|-----|----|
| --               | chr14 | 105073583 | T     | A     | -- | -- | IGR     | SNP | 0.261 | 17  | 6  |
| --               | chr14 | 105135684 | C     | A     | -- | -- | IGR     | SNP | 0.364 | 7   | 4  |
| --               | chr14 | 105140726 | C     | A     | -- | -- | IGR     | SNP | 0.286 | 45  | 18 |
| --               | chr14 | 105140727 | T     | A     | -- | -- | IGR     | SNP | 0.286 | 45  | 18 |
| <i>AKT1</i>      | chr14 | 105256911 | AAGG  | -     | -- | -- | Intron  | DEL | 0.159 | 37  | 7  |
| <i>MGC23270</i>  | chr14 | 105290073 | G     | A     | -- | -- | 3'Flank | SNP | 0.160 | 21  | 4  |
| --               | chr14 | 105388899 | G     | T     | -- | -- | IGR     | SNP | 0.536 | 13  | 15 |
| <i>PLD4</i>      | chr14 | 105390529 | G     | C     | -- | -- | 5'Flank | SNP | 0.268 | 41  | 15 |
| <i>MTA1</i>      | chr14 | 105919567 | A     | T     | -- | -- | Intron  | SNP | 0.308 | 45  | 20 |
| <i>CRIP2</i>     | chr14 | 105945917 | C     | T     | -- | -- | Intron  | SNP | 0.294 | 48  | 20 |
| --               | chr14 | 105987454 | C     | T     | -- | -- | IGR     | SNP | 0.218 | 61  | 17 |
| --               | chr14 | 106032351 | C     | A     | -- | -- | IGR     | SNP | 0.273 | 16  | 6  |
| --               | chr14 | 106056499 | C     | G     | -- | -- | IGR     | SNP | 0.189 | 30  | 7  |
| --               | chr14 | 106090970 | G     | T     | -- | -- | IGR     | SNP | 0.238 | 64  | 20 |
| --               | chr14 | 106137588 | T     | C     | -- | -- | IGR     | SNP | 0.296 | 19  | 8  |
| --               | chr14 | 106160091 | -     | GACAC | -- | -- | IGR     | INS | 0.125 | 14  | 2  |
| --               | chr14 | 106169523 | G     | C     | -- | -- | IGR     | SNP | 0.205 | 58  | 15 |
| --               | chr14 | 106207967 | G     | T     | -- | -- | IGR     | SNP | 0.128 | 34  | 5  |
| --               | chr14 | 106224773 | A     | C     | -- | -- | IGR     | SNP | 0.600 | 16  | 24 |
| --               | chr14 | 106225157 | T     | A     | -- | -- | IGR     | SNP | 0.222 | 21  | 6  |
| --               | chr14 | 106227368 | G     | T     | -- | -- | IGR     | SNP | 0.295 | 55  | 23 |
| --               | chr14 | 106240779 | G     | T     | -- | -- | IGR     | SNP | 0.308 | 36  | 16 |
| --               | chr14 | 106298886 | G     | T     | -- | -- | IGR     | SNP | 0.211 | 15  | 4  |
| --               | chr14 | 106379166 | C     | T     | -- | -- | IGR     | SNP | 0.550 | 9   | 11 |
| --               | chr14 | 106423746 | T     | G     | -- | -- | IGR     | SNP | 0.167 | 20  | 4  |
| --               | chr14 | 106492545 | C     | A     | -- | -- | IGR     | SNP | 0.296 | 38  | 16 |
| --               | chr14 | 106550067 | A     | T     | -- | -- | IGR     | SNP | 0.941 | 1   | 16 |
| --               | chr14 | 106629032 | A     | G     | -- | -- | IGR     | SNP | 0.300 | 14  | 6  |
| --               | chr14 | 106653356 | T     | A     | -- | -- | IGR     | SNP | 0.111 | 40  | 5  |
| --               | chr14 | 106705144 | C     | T     | -- | -- | IGR     | SNP | 0.175 | 33  | 7  |
| --               | chr14 | 106792133 | -     | TTTG  | -- | -- | IGR     | INS | 0.125 | 14  | 2  |
| --               | chr14 | 106911753 | T     | A     | -- | -- | IGR     | SNP | 0.256 | 29  | 10 |
| --               | chr14 | 107017889 | G     | T     | -- | -- | IGR     | SNP | 0.174 | 19  | 4  |
| --               | chr14 | 107071531 | G     | A     | -- | -- | IGR     | SNP | 0.619 | 16  | 26 |
| --               | chr14 | 107128787 | A     | G     | -- | -- | IGR     | SNP | 0.105 | 34  | 4  |
| --               | chr14 | 107183863 | G     | A     | -- | -- | IGR     | SNP | 0.116 | 38  | 5  |
| --               | chr14 | 107252945 | C     | T     | -- | -- | IGR     | SNP | 0.434 | 30  | 23 |
| --               | chr15 | 20024270  | C     | A     | -- | -- | IGR     | SNP | 0.286 | 25  | 10 |
| --               | chr15 | 20024339  | T     | C     | -- | -- | IGR     | SNP | 0.220 | 32  | 9  |
| --               | chr15 | 20046415  | T     | A     | -- | -- | IGR     | SNP | 0.103 | 26  | 3  |
| --               | chr15 | 20053226  | -     | GTATT | -- | -- | IGR     | INS | 0.167 | 30  | 6  |
| --               | chr15 | 20053232  | T     | C     | -- | -- | IGR     | SNP | 0.182 | 27  | 6  |
| --               | chr15 | 20053237  | C     | T     | -- | -- | IGR     | SNP | 0.188 | 26  | 6  |
| --               | chr15 | 20082969  | T     | C     | -- | -- | IGR     | SNP | 0.115 | 46  | 6  |
| --               | chr15 | 20093299  | C     | T     | -- | -- | IGR     | SNP | 0.111 | 32  | 4  |
| --               | chr15 | 20114040  | T     | C     | -- | -- | IGR     | SNP | 0.111 | 56  | 7  |
| --               | chr15 | 20121956  | T     | A     | -- | -- | IGR     | SNP | 0.220 | 32  | 9  |
| --               | chr15 | 20122222  | T     | G     | -- | -- | IGR     | SNP | 0.105 | 51  | 6  |
| --               | chr15 | 20128548  | A     | G     | -- | -- | IGR     | SNP | 0.150 | 17  | 3  |
| --               | chr15 | 20134381  | C     | T     | -- | -- | IGR     | SNP | 0.200 | 40  | 10 |
| --               | chr15 | 20134564  | C     | T     | -- | -- | IGR     | SNP | 0.146 | 35  | 6  |
| --               | chr15 | 20136495  | G     | T     | -- | -- | IGR     | SNP | 0.102 | 44  | 5  |
| --               | chr15 | 20138186  | C     | A     | -- | -- | IGR     | SNP | 0.114 | 39  | 5  |
| --               | chr15 | 20140941  | G     | A     | -- | -- | IGR     | SNP | 0.174 | 38  | 8  |
| --               | chr15 | 20147719  | A     | T     | -- | -- | IGR     | SNP | 0.220 | 32  | 9  |
| --               | chr15 | 20148020  | T     | G     | -- | -- | IGR     | SNP | 0.113 | 47  | 6  |
| --               | chr15 | 20148021  | C     | T     | -- | -- | IGR     | SNP | 0.113 | 47  | 6  |
| --               | chr15 | 20176163  | C     | G     | -- | -- | IGR     | SNP | 0.514 | 17  | 18 |
| --               | chr15 | 20220704  | G     | C     | -- | -- | IGR     | SNP | 0.143 | 60  | 10 |
| --               | chr15 | 20266416  | ATAAT | -     | -- | -- | IGR     | DEL | 0.286 | 10  | 4  |
| --               | chr15 | 20307772  | G     | A     | -- | -- | IGR     | SNP | 0.190 | 34  | 8  |
| --               | chr15 | 20332445  | G     | T     | -- | -- | IGR     | SNP | 0.444 | 5   | 4  |
| --               | chr15 | 20391247  | A     | G     | -- | -- | IGR     | SNP | 0.102 | 106 | 12 |
| --               | chr15 | 20411036  | C     | T     | -- | -- | IGR     | SNP | 0.187 | 113 | 26 |
| --               | chr15 | 20419673  | T     | A     | -- | -- | IGR     | SNP | 0.160 | 21  | 4  |
| <i>LOC646096</i> | chr15 | 20488889  | T     | C     | -- | -- | RNA     | SNP | 0.119 | 141 | 19 |
| --               | chr15 | 20511306  | C     | T     | -- | -- | IGR     | SNP | 0.110 | 145 | 18 |
| --               | chr15 | 20539627  | T     | C     | -- | -- | IGR     | SNP | 0.120 | 22  | 3  |
| --               | chr15 | 20543288  | C     | T     | -- | -- | IGR     | SNP | 0.174 | 19  | 4  |
| <i>HERC2P3</i>   | chr15 | 20618324  | A     | G     | -- | -- | RNA     | SNP | 0.132 | 33  | 5  |
| --               | chr15 | 20733596  | -     | GA    | -- | -- | IGR     | INS | 0.105 | 17  | 2  |
| <i>NBEAP1</i>    | chr15 | 20880698  | A     | C     | -- | -- | RNA     | SNP | 0.170 | 39  | 8  |
| --               | chr15 | 20991006  | G     | A     | -- | -- | IGR     | SNP | 0.132 | 297 | 45 |
| --               | chr15 | 21086081  | G     | A     | -- | -- | IGR     | SNP | 0.172 | 96  | 20 |
| --               | chr15 | 21103137  | C     | A     | -- | -- | IGR     | SNP | 0.167 | 20  | 4  |
| <i>LOC348120</i> | chr15 | 21171573  | G     | A     | -- | -- | RNA     | SNP | 0.190 | 17  | 4  |
| --               | chr15 | 21209262  | G     | A     | -- | -- | IGR     | SNP | 0.115 | 54  | 7  |
| --               | chr15 | 21209481  | G     | T     | -- | -- | IGR     | SNP | 0.121 | 29  | 4  |
| --               | chr15 | 21278951  | G     | A     | -- | -- | IGR     | SNP | 0.278 | 26  | 10 |
| --               | chr15 | 21284489  | A     | T     | -- | -- | IGR     | SNP | 0.167 | 30  | 6  |



|             |       |          |       |     |    |    |         |     |       |     |    |
|-------------|-------|----------|-------|-----|----|----|---------|-----|-------|-----|----|
| --          | chr15 | 21367578 | A     | G   | -- | -- | IGR     | SNP | 0.125 | 42  | 6  |
| --          | chr15 | 21391265 | -     | TTG | -- | -- | IGR     | INS | 0.150 | 17  | 3  |
| --          | chr15 | 21398663 | A     | G   | -- | -- | IGR     | SNP | 0.157 | 43  | 8  |
| --          | chr15 | 21885862 | A     | C   | -- | -- | IGR     | SNP | 0.235 | 13  | 4  |
| --          | chr15 | 21974969 | G     | T   | -- | -- | IGR     | SNP | 0.172 | 24  | 5  |
| CXADRP2     | chr15 | 22017074 | TAA   | -   | -- | -- | 5'Flank | DEL | 0.167 | 15  | 3  |
| --          | chr15 | 22164681 | T     | G   | -- | -- | IGR     | SNP | 0.259 | 20  | 7  |
| LOC727924   | chr15 | 22308862 | C     | T   | -- | -- | RNA     | SNP | 0.132 | 66  | 10 |
| --          | chr15 | 22449759 | G     | C   | -- | -- | IGR     | SNP | 0.176 | 126 | 27 |
| --          | chr15 | 22518884 | C     | T   | -- | -- | IGR     | SNP | 0.105 | 128 | 15 |
| --          | chr15 | 22543724 | T     | C   | -- | -- | IGR     | SNP | 0.154 | 104 | 19 |
| --          | chr15 | 22664127 | G     | C   | -- | -- | IGR     | SNP | 0.600 | 4   | 6  |
| --          | chr15 | 22819885 | A     | T   | -- | -- | IGR     | SNP | 0.167 | 40  | 8  |
| CYFIP1      | chr15 | 22910544 | C     | T   | -- | -- | Intron  | SNP | 0.224 | 38  | 11 |
| LOC283683   | chr15 | 23109499 | T     | C   | -- | -- | RNA     | SNP | 0.131 | 53  | 8  |
| LOC283683   | chr15 | 23113968 | C     | T   | -- | -- | RNA     | SNP | 0.105 | 34  | 4  |
| --          | chr15 | 23153033 | T     | G   | -- | -- | IGR     | SNP | 0.190 | 34  | 8  |
| HERC2P2     | chr15 | 23308054 | T     | C   | -- | -- | RNA     | SNP | 0.179 | 23  | 5  |
| HERC2P2     | chr15 | 23360775 | C     | T   | -- | -- | RNA     | SNP | 0.167 | 20  | 4  |
| HERC2P7     | chr15 | 23391469 | A     | G   | -- | -- | RNA     | SNP | 0.211 | 15  | 4  |
| --          | chr15 | 23865241 | C     | G   | -- | -- | IGR     | SNP | 0.390 | 36  | 23 |
| --          | chr15 | 23909326 | G     | A   | -- | -- | IGR     | SNP | 0.426 | 35  | 26 |
| --          | chr15 | 24229965 | G     | C   | -- | -- | IGR     | SNP | 0.220 | 39  | 11 |
| --          | chr15 | 24515202 | G     | C   | -- | -- | IGR     | SNP | 0.100 | 36  | 4  |
| --          | chr15 | 24517843 | C     | G   | -- | -- | IGR     | SNP | 0.227 | 34  | 10 |
| --          | chr15 | 24641830 | T     | C   | -- | -- | IGR     | SNP | 0.227 | 17  | 5  |
| --          | chr15 | 24658572 | CATAG | -   | -- | -- | IGR     | DEL | 0.156 | 27  | 5  |
| --          | chr15 | 24882391 | T     | A   | -- | -- | IGR     | SNP | 0.125 | 21  | 3  |
| --          | chr15 | 25039102 | G     | A   | -- | -- | IGR     | SNP | 0.524 | 30  | 33 |
| --          | chr15 | 25236543 | T     | C   | -- | -- | IGR     | SNP | 0.404 | 28  | 19 |
| --          | chr15 | 25721760 | T     | G   | -- | -- | IGR     | SNP | 0.512 | 21  | 22 |
| --          | chr15 | 25864391 | C     | T   | -- | -- | IGR     | SNP | 0.444 | 35  | 28 |
| ATP10A      | chr15 | 26086167 | C     | G   | -- | -- | Intron  | SNP | 0.414 | 34  | 24 |
| --          | chr15 | 26139515 | TTA   | -   | -- | -- | IGR     | DEL | 0.227 | 34  | 10 |
| --          | chr15 | 26310008 | T     | A   | -- | -- | IGR     | SNP | 0.442 | 29  | 23 |
| LOC503519   | chr15 | 26372382 | G     | T   | -- | -- | RNA     | SNP | 0.640 | 9   | 16 |
| --          | chr15 | 26388620 | A     | T   | -- | -- | IGR     | SNP | 0.395 | 26  | 17 |
| --          | chr15 | 26538700 | C     | A   | -- | -- | IGR     | SNP | 0.153 | 61  | 11 |
| --          | chr15 | 26550182 | G     | T   | -- | -- | IGR     | SNP | 0.133 | 26  | 4  |
| GABRB3      | chr15 | 26901543 | G     | T   | -- | -- | Intron  | SNP | 0.195 | 62  | 15 |
| GABRB3      | chr15 | 26954658 | C     | T   | -- | -- | Intron  | SNP | 0.217 | 18  | 5  |
| GABRB3      | chr15 | 26954662 | C     | T   | -- | -- | Intron  | SNP | 0.211 | 15  | 4  |
| --          | chr15 | 27082627 | T     | A   | -- | -- | IGR     | SNP | 0.318 | 30  | 14 |
| GABRG3      | chr15 | 27480626 | A     | C   | -- | -- | Intron  | SNP | 0.182 | 54  | 12 |
| GABRG3      | chr15 | 27531033 | T     | A   | -- | -- | Intron  | SNP | 0.100 | 54  | 6  |
| GABRG3      | chr15 | 27691458 | C     | T   | -- | -- | Intron  | SNP | 0.188 | 39  | 9  |
| --          | chr15 | 27826204 | T     | A   | -- | -- | IGR     | SNP | 0.250 | 30  | 10 |
| OCA2        | chr15 | 28104772 | T     | G   | -- | -- | Intron  | SNP | 0.480 | 26  | 24 |
| OCA2        | chr15 | 28284368 | T     | C   | -- | -- | Intron  | SNP | 0.474 | 30  | 27 |
| HERC2       | chr15 | 28541883 | T     | A   | -- | -- | Intron  | SNP | 0.143 | 24  | 4  |
| --          | chr15 | 28571259 | TCTCA | -   | -- | -- | IGR     | DEL | 0.150 | 17  | 3  |
| GOLGA8F,GC  | chr15 | 28633121 | T     | C   | -- | -- | RNA     | SNP | 0.190 | 17  | 4  |
| --          | chr15 | 28785794 | G     | A   | -- | -- | IGR     | SNP | 0.182 | 27  | 6  |
| --          | chr15 | 28821363 | T     | C   | -- | -- | IGR     | SNP | 0.250 | 24  | 8  |
| LOC646278   | chr15 | 29090020 | C     | A   | -- | -- | RNA     | SNP | 0.220 | 46  | 13 |
| --          | chr15 | 29123956 | G     | T   | -- | -- | IGR     | SNP | 0.108 | 33  | 4  |
| APBA2       | chr15 | 29392344 | G     | A   | -- | -- | Intron  | SNP | 0.113 | 55  | 7  |
| FAM189A1    | chr15 | 29467793 | G     | T   | -- | -- | Intron  | SNP | 0.426 | 31  | 23 |
| FAM189A1    | chr15 | 29523798 | A     | T   | -- | -- | Intron  | SNP | 0.553 | 21  | 26 |
| FAM189A1    | chr15 | 29800118 | G     | C   | -- | -- | Intron  | SNP | 0.410 | 23  | 16 |
| --          | chr15 | 30156664 | C     | G   | -- | -- | IGR     | SNP | 0.475 | 21  | 19 |
| --          | chr15 | 30206918 | C     | G   | -- | -- | IGR     | SNP | 0.468 | 25  | 22 |
| FAM7A3      | chr15 | 30418342 | C     | T   | -- | -- | RNA     | SNP | 0.333 | 10  | 5  |
| LOC653075   | chr15 | 30437737 | G     | T   | -- | -- | RNA     | SNP | 0.455 | 6   | 5  |
| --          | chr15 | 30639969 | G     | A   | -- | -- | IGR     | SNP | 0.140 | 37  | 6  |
| --          | chr15 | 30728088 | C     | T   | -- | -- | IGR     | SNP | 0.167 | 25  | 5  |
| --          | chr15 | 30900730 | A     | G   | -- | -- | IGR     | SNP | 0.100 | 36  | 4  |
| --          | chr15 | 30909856 | A     | T   | -- | -- | IGR     | SNP | 0.149 | 40  | 7  |
| ARHGAP11B   | chr15 | 30918327 | C     | T   | -- | -- | 5'Flank | SNP | 0.127 | 48  | 7  |
| ARHGAP11B   | chr15 | 30930250 | G     | T   | -- | -- | Intron  | SNP | 0.143 | 24  | 4  |
| LOC10028863 | chr15 | 31041241 | C     | A   | -- | -- | RNA     | SNP | 0.220 | 71  | 20 |
| --          | chr15 | 31085579 | C     | A   | -- | -- | IGR     | SNP | 0.517 | 29  | 31 |
| --          | chr15 | 31132722 | A     | G   | -- | -- | IGR     | SNP | 0.391 | 39  | 25 |
| FAN1        | chr15 | 31229643 | T     | C   | -- | -- | Intron  | SNP | 0.222 | 28  | 8  |
| MTMR10      | chr15 | 31260781 | A     | C   | -- | -- | Intron  | SNP | 0.143 | 30  | 5  |
| TRPM1       | chr15 | 31344482 | A     | T   | -- | -- | Intron  | SNP | 0.271 | 35  | 13 |
| --          | chr15 | 31508344 | C     | G   | -- | -- | IGR     | SNP | 0.167 | 20  | 4  |
| --          | chr15 | 31608212 | G     | C   | -- | -- | IGR     | SNP | 0.542 | 22  | 26 |
| --          | chr15 | 31611051 | A     | C   | -- | -- | IGR     | SNP | 0.224 | 59  | 17 |
| --          | chr15 | 31737968 | A     | G   | -- | -- | IGR     | SNP | 0.157 | 43  | 8  |

|             |       |          |        |    |        |        |                 |     |       |    |    |
|-------------|-------|----------|--------|----|--------|--------|-----------------|-----|-------|----|----|
| OTUD7A      | chr15 | 31870773 | G      | T  | --     | --     | Intron          | SNP | 0.125 | 28 | 4  |
| --          | chr15 | 32026210 | A      | G  | --     | --     | IGR             | SNP | 0.143 | 42 | 7  |
| --          | chr15 | 32093679 | G      | C  | --     | --     | IGR             | SNP | 0.114 | 31 | 4  |
| --          | chr15 | 32159212 | G      | T  | --     | --     | IGR             | SNP | 0.519 | 26 | 28 |
| --          | chr15 | 32200237 | G      | T  | --     | --     | IGR             | SNP | 0.200 | 16 | 4  |
| --          | chr15 | 32222516 | C      | A  | --     | --     | IGR             | SNP | 0.292 | 17 | 7  |
| --          | chr15 | 32295556 | -      | TA | --     | --     | IGR             | INS | 0.222 | 28 | 8  |
| --          | chr15 | 32613743 | A      | G  | --     | --     | IGR             | SNP | 0.294 | 12 | 5  |
| FMN1        | chr15 | 33139339 | G      | C  | --     | --     | Intron          | SNP | 0.357 | 36 | 20 |
| FMN1        | chr15 | 33177114 | T      | A  | --     | --     | Intron          | SNP | 0.420 | 47 | 34 |
| --          | chr15 | 33406313 | C      | T  | --     | --     | IGR             | SNP | 0.262 | 31 | 11 |
| --          | chr15 | 33543063 | C      | A  | --     | --     | IGR             | SNP | 0.162 | 31 | 6  |
| RYR3        | chr15 | 33687761 | G      | T  | --     | --     | Intron          | SNP | 0.421 | 33 | 24 |
| RYR3        | chr15 | 33753781 | G      | T  | --     | --     | Intron          | SNP | 0.279 | 31 | 12 |
| RYR3        | chr15 | 33759867 | C      | T  | --     | --     | Intron          | SNP | 0.431 | 29 | 22 |
| RYR3        | chr15 | 33930494 | G      | A  | --     | --     | Intron          | SNP | 0.441 | 33 | 26 |
| CHRM5       | chr15 | 34349517 | G      | T  | --     | --     | Intron          | SNP | 0.121 | 29 | 4  |
| C15orf29    | chr15 | 34497209 | C      | T  | --     | --     | Intron          | SNP | 0.140 | 37 | 6  |
| --          | chr15 | 34698106 | G      | A  | --     | --     | IGR             | SNP | 0.231 | 20 | 6  |
| --          | chr15 | 34932503 | G      | T  | --     | --     | IGR             | SNP | 0.275 | 37 | 14 |
| --          | chr15 | 34933816 | G      | T  | --     | --     | IGR             | SNP | 0.250 | 18 | 6  |
| AQR         | chr15 | 35160171 | T      | A  | --     | --     | Intron          | SNP | 0.155 | 49 | 9  |
| --          | chr15 | 35562010 | G      | T  | --     | --     | IGR             | SNP | 0.400 | 6  | 4  |
| LOC10050746 | chr15 | 36010755 | G      | C  | --     | --     | RNA             | SNP | 0.313 | 22 | 10 |
| LOC10050746 | chr15 | 36084845 | C      | T  | --     | --     | RNA             | SNP | 0.204 | 43 | 11 |
| --          | chr15 | 36615019 | T      | A  | --     | --     | IGR             | SNP | 0.304 | 39 | 17 |
| --          | chr15 | 36638962 | A      | C  | --     | --     | IGR             | SNP | 0.444 | 25 | 20 |
| --          | chr15 | 36715914 | C      | A  | --     | --     | IGR             | SNP | 0.182 | 36 | 8  |
| --          | chr15 | 37408503 | C      | T  | --     | --     | IGR             | SNP | 0.659 | 14 | 27 |
| --          | chr15 | 37788806 | G      | T  | --     | --     | IGR             | SNP | 0.200 | 40 | 10 |
| --          | chr15 | 38119530 | T      | A  | --     | --     | IGR             | SNP | 0.313 | 22 | 10 |
| --          | chr15 | 38191636 | T      | C  | --     | --     | IGR             | SNP | 0.554 | 29 | 36 |
| --          | chr15 | 38294737 | T      | C  | --     | --     | IGR             | SNP | 0.564 | 17 | 22 |
| --          | chr15 | 38493194 | G      | C  | --     | --     | IGR             | SNP | 0.423 | 30 | 22 |
| --          | chr15 | 38709043 | G      | C  | --     | --     | IGR             | SNP | 0.493 | 34 | 33 |
| --          | chr15 | 38896996 | A      | G  | --     | --     | IGR             | SNP | 0.561 | 18 | 23 |
| --          | chr15 | 39068399 | AT     | -  | --     | --     | IGR             | DEL | 0.571 | 6  | 8  |
| --          | chr15 | 39102200 | A      | G  | --     | --     | IGR             | SNP | 0.443 | 34 | 27 |
| --          | chr15 | 39466401 | C      | G  | --     | --     | IGR             | SNP | 0.581 | 31 | 43 |
| EIF2AK4     | chr15 | 40273949 | -      | GA | --     | --     | Intron          | INS | 0.208 | 42 | 11 |
| BAHD1       | chr15 | 40743297 | C      | T  | --     | --     | Intron          | SNP | 0.462 | 21 | 18 |
| CASC5       | chr15 | 40923597 | A      | T  | --     | --     | Intron          | SNP | 0.104 | 43 | 5  |
| INO80       | chr15 | 41374448 | C      | A  | --     | --     | Intron          | SNP | 0.308 | 9  | 4  |
| INO80       | chr15 | 41379770 | C      | T  | G648A  | K216K  | Silent          | SNP | 0.500 | 28 | 28 |
| INO80       | chr15 | 41379778 | C      | A  | G640T  | E214X  | Nonsense_mutat  | SNP | 0.518 | 27 | 29 |
| RTF1        | chr15 | 41739006 | T      | A  | --     | --     | Intron          | SNP | 0.100 | 27 | 3  |
| RPAP1       | chr15 | 41832518 | A      | T  | --     | --     | Intron          | SNP | 0.133 | 26 | 4  |
| --          | chr15 | 41885590 | G      | A  | --     | --     | IGR             | SNP | 0.154 | 22 | 4  |
| MAPKBP1     | chr15 | 42073090 | C      | G  | --     | --     | Intron          | SNP | 0.491 | 29 | 28 |
| EHD4        | chr15 | 42255513 | G      | A  | --     | --     | Intron          | SNP | 0.182 | 18 | 4  |
| PLA2G4E     | chr15 | 42340880 | G      | T  | --     | --     | Intron          | SNP | 0.139 | 62 | 10 |
| ZFP106      | chr15 | 42731540 | T      | A  | A4166T | K1389M | Missense_mutati | SNP | 0.149 | 40 | 7  |
| STARD9      | chr15 | 42918872 | TA     | -  | --     | --     | Intron          | DEL | 0.143 | 30 | 5  |
| UBR1        | chr15 | 43358002 | T      | A  | --     | --     | Intron          | SNP | 0.273 | 40 | 15 |
| EPB42       | chr15 | 43495133 | A      | G  | --     | --     | Intron          | SNP | 0.194 | 54 | 13 |
| --          | chr15 | 43942690 | CCTCTG | -  | --     | --     | IGR             | DEL | 0.105 | 17 | 2  |
| --          | chr15 | 44996240 | G      | C  | --     | --     | IGR             | SNP | 0.100 | 36 | 4  |
| --          | chr15 | 45218927 | G      | A  | --     | --     | IGR             | SNP | 0.250 | 12 | 4  |
| DUOX1       | chr15 | 45439677 | C      | A  | C2369A | S790Y  | Missense_mutati | SNP | 0.203 | 51 | 13 |
| --          | chr15 | 46554093 | A      | C  | --     | --     | IGR             | SNP | 0.275 | 58 | 22 |
| --          | chr15 | 46584934 | AT     | -  | --     | --     | IGR             | DEL | 0.418 | 32 | 23 |
| --          | chr15 | 46613611 | G      | T  | --     | --     | IGR             | SNP | 0.224 | 59 | 17 |
| --          | chr15 | 46739476 | G      | T  | --     | --     | IGR             | SNP | 0.186 | 35 | 8  |
| --          | chr15 | 46926824 | C      | A  | --     | --     | IGR             | SNP | 0.250 | 27 | 9  |
| --          | chr15 | 47267142 | C      | T  | --     | --     | IGR             | SNP | 0.357 | 18 | 10 |
| --          | chr15 | 47345835 | G      | A  | --     | --     | IGR             | SNP | 0.111 | 40 | 5  |
| --          | chr15 | 47353274 | T      | G  | --     | --     | IGR             | SNP | 0.125 | 21 | 3  |
| --          | chr15 | 47367857 | T      | C  | --     | --     | IGR             | SNP | 0.143 | 30 | 5  |
| --          | chr15 | 47367995 | A      | T  | --     | --     | IGR             | SNP | 0.143 | 36 | 6  |
| --          | chr15 | 47381994 | G      | A  | --     | --     | IGR             | SNP | 0.148 | 23 | 4  |
| --          | chr15 | 47382010 | A      | G  | --     | --     | IGR             | SNP | 0.143 | 24 | 4  |
| --          | chr15 | 47412078 | A      | T  | --     | --     | IGR             | SNP | 0.255 | 41 | 14 |
| --          | chr15 | 47427948 | T      | G  | --     | --     | IGR             | SNP | 0.341 | 27 | 14 |
| --          | chr15 | 47433203 | C      | T  | --     | --     | IGR             | SNP | 0.378 | 28 | 17 |
| --          | chr15 | 47463051 | C      | T  | --     | --     | IGR             | SNP | 0.125 | 21 | 3  |
| --          | chr15 | 47463293 | T      | G  | --     | --     | IGR             | SNP | 0.103 | 26 | 3  |
| SEMA6D      | chr15 | 47644716 | T      | C  | --     | --     | Intron          | SNP | 0.254 | 44 | 15 |
| SEMA6D      | chr15 | 47693913 | A      | T  | --     | --     | Intron          | SNP | 0.194 | 50 | 12 |
| SEMA6D      | chr15 | 47843412 | C      | G  | --     | --     | Intron          | SNP | 0.147 | 58 | 10 |
| SEMA6D      | chr15 | 47919093 | A      | C  | --     | --     | Intron          | SNP | 0.130 | 47 | 7  |

|           |       |          |             |     |             |             |                 |     |       |    |    |
|-----------|-------|----------|-------------|-----|-------------|-------------|-----------------|-----|-------|----|----|
| SEMA6D    | chr15 | 47927387 | A           | T   | --          | --          | Intron          | SNP | 0.185 | 44 | 10 |
| SEMA6D    | chr15 | 47952494 | G           | T   | --          | --          | Intron          | SNP | 0.229 | 37 | 11 |
| SEMA6D    | chr15 | 48021178 | A           | T   | --          | --          | Intron          | SNP | 0.148 | 46 | 8  |
| --        | chr15 | 48183721 | C           | A   | --          | --          | IGR             | SNP | 0.220 | 32 | 9  |
| FBN1      | chr15 | 48909475 | G           | T   | --          | --          | Intron          | SNP | 0.396 | 32 | 21 |
| SHC4      | chr15 | 49190533 | T           | C   | --          | --          | Intron          | SNP | 0.214 | 44 | 12 |
| SHC4      | chr15 | 49232902 | A           | T   | --          | --          | Intron          | SNP | 0.200 | 68 | 17 |
| --        | chr15 | 49264276 | G           | A   | --          | --          | IGR             | SNP | 0.389 | 55 | 35 |
| C15orf33  | chr15 | 49834620 | G           | A   | --          | --          | Intron          | SNP | 0.442 | 24 | 19 |
| ATP8B4    | chr15 | 50224073 | G           | T   | --          | --          | Intron          | SNP | 0.111 | 32 | 4  |
| ATP8B4    | chr15 | 50372030 | C           | A   | --          | --          | Intron          | SNP | 0.291 | 39 | 16 |
| ATP8B4    | chr15 | 50372031 | A           | C   | --          | --          | Intron          | SNP | 0.264 | 39 | 14 |
| --        | chr15 | 50451103 | G           | A   | --          | --          | IGR             | SNP | 0.161 | 26 | 5  |
| --        | chr15 | 50451111 | C           | G   | --          | --          | IGR             | SNP | 0.194 | 25 | 6  |
| --        | chr15 | 50451125 | -           | CCA | --          | --          | IGR             | INS | 0.118 | 30 | 4  |
| SPPL2A    | chr15 | 50999624 | A           | C   | --          | --          | 3'Flank         | SNP | 0.200 | 36 | 9  |
| --        | chr15 | 52593122 | C           | G   | --          | --          | IGR             | SNP | 0.439 | 32 | 25 |
| MYO5A     | chr15 | 52666921 | G           | A   | --          | --          | Intron          | SNP | 0.237 | 29 | 9  |
| MYO5A     | chr15 | 52666928 | G           | A   | --          | --          | Intron          | SNP | 0.282 | 28 | 11 |
| MYO5A     | chr15 | 52752505 | G           | T   | --          | --          | Intron          | SNP | 0.113 | 47 | 6  |
| MYO5A     | chr15 | 52752518 | T           | G   | --          | --          | Intron          | SNP | 0.130 | 40 | 6  |
| KIAA1370  | chr15 | 52930928 | T           | G   | --          | --          | Intron          | SNP | 0.125 | 21 | 3  |
| --        | chr15 | 52980282 | AG          | -   | --          | --          | IGR             | DEL | 0.464 | 30 | 26 |
| --        | chr15 | 52995826 | G           | C   | --          | --          | IGR             | SNP | 0.234 | 36 | 11 |
| --        | chr15 | 53044093 | G           | A   | --          | --          | IGR             | SNP | 0.160 | 21 | 4  |
| --        | chr15 | 53101826 | C           | T   | --          | --          | IGR             | SNP | 0.483 | 30 | 28 |
| --        | chr15 | 53254197 | C           | G   | --          | --          | IGR             | SNP | 0.353 | 11 | 6  |
| --        | chr15 | 53260199 | C           | G   | --          | --          | IGR             | SNP | 0.234 | 49 | 15 |
| --        | chr15 | 53386063 | G           | C   | --          | --          | IGR             | SNP | 0.190 | 47 | 11 |
| --        | chr15 | 53389361 | T           | C   | --          | --          | IGR             | SNP | 0.200 | 52 | 13 |
| --        | chr15 | 53530481 | G           | T   | --          | --          | IGR             | SNP | 0.341 | 29 | 15 |
| --        | chr15 | 53587528 | T           | A   | --          | --          | IGR             | SNP | 0.447 | 21 | 17 |
| --        | chr15 | 53647088 | G           | A   | --          | --          | IGR             | SNP | 0.500 | 25 | 25 |
| --        | chr15 | 53692885 | C           | A   | --          | --          | IGR             | SNP | 0.500 | 29 | 29 |
| WDR72     | chr15 | 53807205 | -           | CAT | --          | --          | 3'UTR           | INS | 0.111 | 40 | 5  |
| WDR72     | chr15 | 53870923 | T           | A   | --          | --          | Intron          | SNP | 0.176 | 56 | 12 |
| WDR72     | chr15 | 53977342 | G           | A   | --          | --          | Intron          | SNP | 0.290 | 22 | 9  |
| WDR72     | chr15 | 54052295 | A           | T   | --          | --          | 5'Flank         | SNP | 0.188 | 26 | 6  |
| UNC13C    | chr15 | 54380155 | C           | T   | --          | --          | Intron          | SNP | 0.400 | 30 | 20 |
| UNC13C    | chr15 | 54380405 | T           | C   | --          | --          | Intron          | SNP | 0.222 | 14 | 4  |
| UNC13C    | chr15 | 54409545 | C           | A   | --          | --          | Intron          | SNP | 0.184 | 40 | 9  |
| UNC13C    | chr15 | 54515889 | G           | T   | --          | --          | Intron          | SNP | 0.149 | 40 | 7  |
| UNC13C    | chr15 | 54707641 | C           | T   | --          | --          | Intron          | SNP | 0.409 | 26 | 18 |
| UNC13C    | chr15 | 54890470 | T           | A   | --          | --          | Intron          | SNP | 0.140 | 43 | 7  |
| --        | chr15 | 54958973 | C           | T   | --          | --          | IGR             | SNP | 0.288 | 37 | 15 |
| --        | chr15 | 55050174 | G           | T   | --          | --          | IGR             | SNP | 0.387 | 19 | 12 |
| --        | chr15 | 55098948 | A           | C   | --          | --          | IGR             | SNP | 0.419 | 36 | 26 |
| --        | chr15 | 55214432 | T           | G   | --          | --          | IGR             | SNP | 0.143 | 24 | 4  |
| PRTG      | chr15 | 56015943 | C           | T   | --          | --          | Intron          | SNP | 0.303 | 23 | 10 |
| --        | chr15 | 56048207 | A           | T   | --          | --          | IGR             | SNP | 0.636 | 8  | 14 |
| NEDD4     | chr15 | 56273310 | C           | G   | --          | --          | Intron          | SNP | 0.333 | 22 | 11 |
| --        | chr15 | 56307811 | G           | T   | --          | --          | IGR             | SNP | 0.500 | 25 | 25 |
| --        | chr15 | 56363989 | G           | A   | --          | --          | IGR             | SNP | 0.240 | 19 | 6  |
| --        | chr15 | 56598624 | C           | T   | --          | --          | IGR             | SNP | 0.245 | 37 | 12 |
| --        | chr15 | 56603324 | CTTTTTTTTTT | -   | --          | --          | IGR             | DEL | 0.118 | 30 | 4  |
| --        | chr15 | 56605376 | C           | G   | --          | --          | IGR             | SNP | 0.250 | 9  | 3  |
| TEX9      | chr15 | 56670274 | G           | T   | --          | --          | Intron          | SNP | 0.483 | 31 | 29 |
| MNS1,TEX9 | chr15 | 56722285 | A           | T   | --          | --          | Intron          | SNP | 0.532 | 29 | 33 |
| --        | chr15 | 57092957 | C           | A   | --          | --          | IGR             | SNP | 0.464 | 30 | 26 |
| CGNL1     | chr15 | 57709447 | T           | C   | --          | --          | Intron          | SNP | 0.277 | 47 | 18 |
| CGNL1     | chr15 | 57740040 | G           | A   | --          | --          | Intron          | SNP | 0.125 | 35 | 5  |
| ALDH1A2   | chr15 | 58252718 | C           | T   | --          | --          | Intron          | SNP | 0.180 | 41 | 9  |
| --        | chr15 | 58395104 | T           | A   | --          | --          | IGR             | SNP | 0.418 | 32 | 23 |
| AQP9      | chr15 | 58462372 | C           | A   | --          | --          | Intron          | SNP | 0.163 | 36 | 7  |
| AQP9      | chr15 | 58462373 | A           | C   | --          | --          | Intron          | SNP | 0.178 | 37 | 8  |
| --        | chr15 | 58546996 | C           | T   | --          | --          | IGR             | SNP | 0.185 | 53 | 12 |
| --        | chr15 | 58657108 | G           | A   | --          | --          | IGR             | SNP | 0.250 | 24 | 8  |
| HSP90AB4P | chr15 | 58984736 | C           | G   | --          | --          | RNA             | SNP | 0.470 | 35 | 31 |
| ADAM10    | chr15 | 59042119 | T           | A   | --          | --          | 5'UTR           | SNP | 0.290 | 22 | 9  |
| --        | chr15 | 59164885 | C           | A   | --          | --          | IGR             | SNP | 0.136 | 19 | 3  |
| SLTM      | chr15 | 59179456 | C           | T   | G2659A,G260 | G887R,G869F | Missense_mutati | SNP | 0.163 | 67 | 13 |
| SLTM      | chr15 | 59195093 | T           | A   | --          | --          | Intron          | SNP | 0.455 | 24 | 20 |
| RNF111    | chr15 | 59304956 | G           | T   | --          | --          | Intron          | SNP | 0.118 | 30 | 4  |
| RNF111    | chr15 | 59364760 | C           | G   | --          | --          | Intron          | SNP | 0.478 | 24 | 22 |
| RNF111    | chr15 | 59364849 | C           | T   | --          | --          | Intron          | SNP | 0.553 | 17 | 21 |
| RNF111    | chr15 | 59364872 | C           | G   | --          | --          | Intron          | SNP | 0.619 | 16 | 26 |
| RNF111    | chr15 | 59375829 | A           | T   | --          | --          | Intron          | SNP | 0.163 | 36 | 7  |
| MYO1E     | chr15 | 59555270 | C           | T   | --          | --          | Intron          | SNP | 0.318 | 30 | 14 |
| FAM81A    | chr15 | 59751432 | C           | G   | --          | --          | Intron          | SNP | 0.452 | 23 | 19 |
| --        | chr15 | 59818438 | G           | A   | --          | --          | IGR             | SNP | 0.160 | 21 | 4  |

|             |       |          |     |       |                           |                 |        |       |       |    |    |
|-------------|-------|----------|-----|-------|---------------------------|-----------------|--------|-------|-------|----|----|
| --          | chr15 | 60038015 | G   | A     | --                        | --              | IGR    | SNP   | 0.222 | 14 | 4  |
| --          | chr15 | 60310168 | C   | G     | --                        | --              | IGR    | SNP   | 0.391 | 42 | 27 |
| RORA        | chr15 | 60944187 | C   | G     | --                        | --              | Intron | SNP   | 0.529 | 24 | 27 |
| RORA        | chr15 | 60960927 | A   | T     | --                        | --              | Intron | SNP   | 0.254 | 47 | 16 |
| RORA        | chr15 | 60979091 | C   | A     | --                        | --              | Intron | SNP   | 0.236 | 55 | 17 |
| --          | chr15 | 61551215 | G   | A     | --                        | --              | IGR    | SNP   | 0.357 | 9  | 5  |
| --          | chr15 | 61624476 | C   | T     | --                        | --              | IGR    | SNP   | 0.440 | 28 | 22 |
| --          | chr15 | 61824694 | C   | T     | --                        | --              | IGR    | SNP   | 0.138 | 25 | 4  |
| --          | chr15 | 61902591 | C   | T     | --                        | --              | IGR    | SNP   | 0.262 | 48 | 17 |
| --          | chr15 | 62635593 | G   | A     | --                        | --              | IGR    | SNP   | 0.198 | 69 | 17 |
| --          | chr15 | 62702869 | C   | T     | --                        | --              | IGR    | SNP   | 0.257 | 52 | 18 |
| --          | chr15 | 62747724 | C   | T     | --                        | --              | IGR    | SNP   | 0.170 | 44 | 9  |
| --          | chr15 | 62784756 | A   | G     | --                        | --              | IGR    | SNP   | 0.206 | 27 | 7  |
| --          | chr15 | 62885157 | C   | G     | --                        | --              | IGR    | SNP   | 0.433 | 38 | 29 |
| TLN2        | chr15 | 63067174 | G   | T     | --                        | --              | Intron | SNP   | 0.200 | 16 | 4  |
| --          | chr15 | 63613795 | C   | T     | --                        | --              | IGR    | SNP   | 0.459 | 53 | 45 |
| --          | chr15 | 63763311 | A   | T     | --                        | --              | IGR    | SNP   | 0.190 | 47 | 11 |
| USP3        | chr15 | 63870149 | C   | A     | --                        | --              | Intron | SNP   | 0.231 | 20 | 6  |
| HERC1       | chr15 | 64002736 | A   | G     | --                        | --              | Intron | SNP   | 0.246 | 43 | 14 |
| --          | chr15 | 64133778 | C   | T     | --                        | --              | IGR    | SNP   | 0.397 | 35 | 23 |
| DAPK2       | chr15 | 64220035 | C   | T     | --                        | --              | Intron | SNP   | 0.419 | 36 | 26 |
| DAPK2       | chr15 | 64221910 | C   | T     | --                        | --              | Intron | SNP   | 0.173 | 43 | 9  |
| DAPK2       | chr15 | 64254543 | C   | G     | --                        | --              | Intron | SNP   | 0.185 | 22 | 5  |
| SNX1        | chr15 | 64434030 | G   | A     | --                        | --              | 3'UTR  | SNP   | 0.169 | 54 | 11 |
| PPIB        | chr15 | 64455341 | C   | T     | --                        | --              | 5'UTR  | SNP   | 0.481 | 14 | 13 |
| KIAA0101    | chr15 | 64670347 | G   | A     | --                        | --              | Intron | SNP   | 0.400 | 21 | 14 |
| --          | chr15 | 64780773 | A   | T     | --                        | --              | IGR    | SNP   | 0.406 | 38 | 26 |
| ZNF609      | chr15 | 64796854 | A   | T     | --                        | --              | Intron | SNP   | 0.100 | 36 | 4  |
| --          | chr15 | 65008412 | C   | A     | --                        | --              | IGR    | SNP   | 0.333 | 18 | 9  |
| SPG21       | chr15 | 65258092 | G   | C     | --                        | --              | Intron | SNP   | 0.179 | 23 | 5  |
| CLPX        | chr15 | 65452965 | A   | T     | --                        | --              | Intron | SNP   | 0.119 | 37 | 5  |
| --          | chr15 | 65519272 | G   | A     | --                        | --              | IGR    | SNP   | 0.136 | 38 | 6  |
| IGDCC3      | chr15 | 65619961 | C   | T     | --                        | --              | 3'UTR  | SNP   | 0.370 | 29 | 17 |
| DPP8        | chr15 | 65762563 | G   | A     | --                        | --              | Intron | SNP   | 0.148 | 23 | 4  |
| RAB11A      | chr15 | 66177638 | G   | T     | --                        | --              | Intron | SNP   | 0.171 | 29 | 6  |
| MEGF11      | chr15 | 66298012 | G   | T     | --                        | --              | Intron | SNP   | 0.491 | 27 | 26 |
| TIPIN       | chr15 | 66647365 | C   | T     | --                        | --              | Intron | SNP   | 0.160 | 21 | 4  |
| SMAD6       | chr15 | 67007392 | A   | T     | --                        | --              | Intron | SNP   | 0.140 | 37 | 6  |
| --          | chr15 | 67139712 | A   | T     | --                        | --              | IGR    | SNP   | 0.135 | 32 | 5  |
| --          | chr15 | 67228070 | G   | A     | --                        | --              | IGR    | SNP   | 0.139 | 31 | 5  |
| LOC10050666 | chr15 | 67745045 | A   | T     | --                        | --              | RNA    | SNP   | 0.286 | 15 | 6  |
| LOC10050666 | chr15 | 67745076 | A   | G     | --                        | --              | RNA    | SNP   | 0.200 | 16 | 4  |
| LOC10050666 | chr15 | 67745242 | T   | C     | --                        | --              | RNA    | SNP   | 0.467 | 8  | 7  |
| MAP2K5      | chr15 | 67877035 | G   | T     | --                        | --              | Intron | SNP   | 0.200 | 12 | 3  |
| --          | chr15 | 68770727 | A   | G     | --                        | --              | IGR    | SNP   | 0.235 | 78 | 24 |
| --          | chr15 | 68863138 | G   | T     | --                        | --              | IGR    | SNP   | 0.133 | 26 | 4  |
| ANP32A      | chr15 | 69099954 | C   | G     | --                        | --              | Intron | SNP   | 0.513 | 38 | 40 |
| MIR548H4    | chr15 | 69241025 | G   | T     | --                        | --              | RNA    | SNP   | 0.583 | 10 | 14 |
| PAQR5       | chr15 | 69597918 | C   | T     | --                        | --              | Intron | SNP   | 0.560 | 22 | 28 |
| PAQR5       | chr15 | 69640601 | C   | G     | --                        | --              | Intron | SNP   | 0.125 | 28 | 4  |
| --          | chr15 | 69922751 | C   | G     | --                        | --              | IGR    | SNP   | 0.397 | 35 | 23 |
| --          | chr15 | 69922989 | C   | A     | --                        | --              | IGR    | SNP   | 0.400 | 36 | 24 |
| --          | chr15 | 69930728 | -   | GACAA | --                        | --              | IGR    | INS   | 0.131 | 52 | 8  |
| --          | chr15 | 70002536 | G   | T     | --                        | --              | IGR    | SNP   | 0.194 | 54 | 13 |
| --          | chr15 | 70063384 | A   | G     | --                        | --              | IGR    | SNP   | 0.324 | 23 | 11 |
| --          | chr15 | 70445183 | G   | A     | --                        | --              | IGR    | SNP   | 0.340 | 33 | 17 |
| --          | chr15 | 70464122 | C   | T     | --                        | --              | IGR    | SNP   | 0.158 | 48 | 9  |
| --          | chr15 | 70572413 | G   | A     | --                        | --              | IGR    | SNP   | 0.250 | 30 | 10 |
| --          | chr15 | 70761970 | A   | C     | --                        | --              | IGR    | SNP   | 0.222 | 63 | 18 |
| UACA        | chr15 | 70996427 | TA  | -     | --                        | --              | Intron | DEL   | 0.242 | 47 | 15 |
| --          | chr15 | 71163437 | C   | T     | --                        | --              | IGR    | SNP   | 0.395 | 23 | 15 |
| LRRC49      | chr15 | 71188564 | C   | T     | --                        | --              | Intron | SNP   | 0.526 | 27 | 30 |
| THSD4       | chr15 | 71699291 | G   | T     | --                        | --              | Intron | SNP   | 0.436 | 22 | 17 |
| THSD4       | chr15 | 71836746 | G   | C     | --                        | --              | Intron | SNP   | 0.174 | 38 | 8  |
| --          | chr15 | 72086391 | GGC | -     | --                        | --              | IGR    | DEL   | 0.143 | 18 | 3  |
| MYO9A       | chr15 | 72239997 | C   | T     | --                        | --              | Intron | SNP   | 0.306 | 34 | 15 |
| MYO9A       | chr15 | 72275990 | A   | T     | --                        | --              | Intron | SNP   | 0.114 | 31 | 4  |
| MYO9A       | chr15 | 72275991 | T   | A     | --                        | --              | Intron | SNP   | 0.114 | 31 | 4  |
| GRAMD2      | chr15 | 72471197 | G   | T     | --                        | --              | Intron | SNP   | 0.174 | 38 | 8  |
| CELF6       | chr15 | 72587336 | G   | A     | --                        | --              | Intron | SNP   | 0.160 | 21 | 4  |
| --          | chr15 | 72734889 | A   | G     | --                        | --              | IGR    | SNP   | 0.111 | 80 | 10 |
| --          | chr15 | 73183902 | C   | T     | --                        | --              | IGR    | SNP   | 0.500 | 15 | 15 |
| --          | chr15 | 73188473 | G   | C     | --                        | --              | IGR    | SNP   | 0.192 | 42 | 10 |
| NEO1        | chr15 | 73402629 | -   | CT    | --                        | --              | Intron | INS   | 0.355 | 40 | 22 |
| NEO1        | chr15 | 73413989 | C   | G     | --                        | --              | Intron | SNP   | 0.317 | 41 | 19 |
| NEO1        | chr15 | 73580654 | G   | T     | G3411T,G337T,K1137N,K1121 | Missense_mutati | SNP    | 0.508 | 30    | 31 |    |
| --          | chr15 | 73685068 | A   | G     | --                        | --              | IGR    | SNP   | 0.136 | 19 | 3  |
| --          | chr15 | 73701222 | T   | A     | --                        | --              | IGR    | SNP   | 0.122 | 43 | 6  |
| --          | chr15 | 73730287 | C   | G     | --                        | --              | IGR    | SNP   | 0.606 | 28 | 43 |
| C15orf60    | chr15 | 73790112 | G   | C     | --                        | --              | Intron | SNP   | 0.208 | 42 | 11 |

|                  |       |          |   |      |        |       |         |     |       |    |    |
|------------------|-------|----------|---|------|--------|-------|---------|-----|-------|----|----|
| <i>C15orf60</i>  | chr15 | 73844465 | T | A    | --     | --    | Intron  | SNP | 0.222 | 49 | 14 |
| <i>CD276</i>     | chr15 | 74004517 | T | A    | --     | --    | Intron  | SNP | 0.174 | 19 | 4  |
| --               | chr15 | 74024838 | G | A    | --     | --    | IGR     | SNP | 0.375 | 25 | 15 |
| --               | chr15 | 74147220 | C | A    | --     | --    | IGR     | SNP | 0.164 | 51 | 10 |
| <i>LOC283731</i> | chr15 | 74418714 | G | T    | --     | --    | RNA     | SNP | 0.214 | 11 | 3  |
| --               | chr15 | 75029197 | G | T    | --     | --    | IGR     | SNP | 0.167 | 20 | 4  |
| --               | chr15 | 75035785 | G | A    | --     | --    | IGR     | SNP | 0.211 | 30 | 8  |
| --               | chr15 | 75103225 | T | A    | --     | --    | IGR     | SNP | 0.176 | 14 | 3  |
| --               | chr15 | 75411559 | C | G    | --     | --    | IGR     | SNP | 0.585 | 17 | 24 |
| --               | chr15 | 75510059 | C | T    | --     | --    | IGR     | SNP | 0.471 | 18 | 16 |
| <i>PTPN9</i>     | chr15 | 75778011 | G | A    | --     | --    | Intron  | SNP | 0.438 | 18 | 14 |
| <i>PTPN9</i>     | chr15 | 75835348 | A | C    | --     | --    | Intron  | SNP | 0.300 | 14 | 6  |
| <i>CSPG4</i>     | chr15 | 75979157 | C | A    | --     | --    | Intron  | SNP | 0.138 | 25 | 4  |
| <i>UBE2Q2</i>    | chr15 | 76170130 | G | T    | --     | --    | Intron  | SNP | 0.174 | 57 | 12 |
| --               | chr15 | 76345402 | A | T    | --     | --    | IGR     | SNP | 0.325 | 27 | 13 |
| <i>ETFA</i>      | chr15 | 76596409 | G | C    | --     | --    | Intron  | SNP | 0.172 | 53 | 11 |
| --               | chr15 | 76613088 | C | T    | --     | --    | IGR     | SNP | 0.448 | 32 | 26 |
| --               | chr15 | 76620436 | C | T    | --     | --    | IGR     | SNP | 0.102 | 79 | 9  |
| <i>SCAPER</i>    | chr15 | 76948145 | A | C    | --     | --    | Intron  | SNP | 0.388 | 41 | 26 |
| <i>SCAPER</i>    | chr15 | 77028609 | C | G    | --     | --    | Intron  | SNP | 0.492 | 32 | 31 |
| <i>SCAPER</i>    | chr15 | 77135046 | G | A    | --     | --    | Intron  | SNP | 0.446 | 36 | 29 |
| <i>HMG20A</i>    | chr15 | 77769343 | G | A    | --     | --    | Intron  | SNP | 0.172 | 48 | 10 |
| <i>HMG20A</i>    | chr15 | 77769344 | A | T    | --     | --    | Intron  | SNP | 0.167 | 50 | 10 |
| --               | chr15 | 77954723 | C | A    | --     | --    | IGR     | SNP | 0.132 | 46 | 7  |
| --               | chr15 | 78997741 | T | C    | --     | --    | IGR     | SNP | 0.455 | 6  | 5  |
| <i>CTSH</i>      | chr15 | 79216563 | A | G    | --     | --    | Intron  | SNP | 0.308 | 9  | 4  |
| <i>CTSH</i>      | chr15 | 79216568 | T | G    | --     | --    | Intron  | SNP | 0.500 | 6  | 6  |
| --               | chr15 | 79396906 | G | C    | --     | --    | IGR     | SNP | 0.185 | 66 | 15 |
| <i>LOC729911</i> | chr15 | 79538458 | C | T    | --     | --    | RNA     | SNP | 0.451 | 39 | 32 |
| --               | chr15 | 79647714 | G | T    | --     | --    | IGR     | SNP | 0.214 | 44 | 12 |
| --               | chr15 | 79711536 | C | A    | --     | --    | IGR     | SNP | 0.143 | 42 | 7  |
| --               | chr15 | 79770278 | C | G    | --     | --    | IGR     | SNP | 0.444 | 30 | 24 |
| --               | chr15 | 79866249 | C | G    | --     | --    | IGR     | SNP | 0.551 | 31 | 38 |
| --               | chr15 | 79926988 | G | A    | --     | --    | IGR     | SNP | 0.143 | 24 | 4  |
| <i>ARNT2</i>     | chr15 | 80780299 | G | C    | --     | --    | Intron  | SNP | 0.348 | 43 | 23 |
| <i>ARNT2</i>     | chr15 | 80801317 | C | A    | --     | --    | Intron  | SNP | 0.235 | 52 | 16 |
| <i>ARNT2</i>     | chr15 | 80835108 | G | T    | --     | --    | Intron  | SNP | 0.368 | 43 | 25 |
| --               | chr15 | 80984914 | C | G    | --     | --    | IGR     | SNP | 0.449 | 27 | 22 |
| <i>KIAA1199</i>  | chr15 | 81199011 | A | T    | A1419T | P473P | Silent  | SNP | 0.488 | 43 | 41 |
| <i>MESDC2</i>    | chr15 | 81267561 | A | C    | --     | --    | 3'Flank | SNP | 0.125 | 28 | 4  |
| --               | chr15 | 81304430 | A | T    | --     | --    | IGR     | SNP | 0.150 | 51 | 9  |
| <i>IL16</i>      | chr15 | 81490912 | C | T    | --     | --    | Intron  | SNP | 0.491 | 27 | 26 |
| --               | chr15 | 82196704 | C | T    | --     | --    | IGR     | SNP | 0.373 | 32 | 19 |
| --               | chr15 | 82232199 | - | TA   | --     | --    | IGR     | INS | 0.397 | 38 | 25 |
| --               | chr15 | 82808983 | G | T    | --     | --    | IGR     | SNP | 0.176 | 14 | 3  |
| <i>CPEB1</i>     | chr15 | 83270517 | T | C    | --     | --    | Intron  | SNP | 0.125 | 35 | 5  |
| --               | chr15 | 83682199 | C | T    | --     | --    | IGR     | SNP | 0.462 | 21 | 18 |
| <i>TM6SF1</i>    | chr15 | 83785442 | C | A    | --     | --    | Intron  | SNP | 0.138 | 69 | 11 |
| <i>HDGFRP3</i>   | chr15 | 83847026 | C | T    | --     | --    | Intron  | SNP | 0.323 | 21 | 10 |
| --               | chr15 | 84028927 | G | C    | --     | --    | IGR     | SNP | 0.100 | 36 | 4  |
| <i>ADAMTSL3</i>  | chr15 | 84602353 | G | C    | --     | --    | Intron  | SNP | 0.383 | 29 | 18 |
| <i>ADAMTSL3</i>  | chr15 | 84611234 | A | G    | --     | --    | Intron  | SNP | 0.432 | 42 | 32 |
| <i>ADAMTSL3</i>  | chr15 | 84697380 | G | A    | --     | --    | Intron  | SNP | 0.455 | 24 | 20 |
| --               | chr15 | 84838959 | T | C    | --     | --    | IGR     | SNP | 0.250 | 15 | 5  |
| --               | chr15 | 84838966 | G | T    | --     | --    | IGR     | SNP | 0.250 | 15 | 5  |
| --               | chr15 | 84946578 | A | T    | --     | --    | IGR     | SNP | 0.143 | 18 | 3  |
| --               | chr15 | 84949920 | A | G    | --     | --    | IGR     | SNP | 0.219 | 25 | 7  |
| --               | chr15 | 84950088 | G | T    | --     | --    | IGR     | SNP | 0.111 | 48 | 6  |
| <i>ZSCAN2</i>    | chr15 | 85160527 | C | T    | --     | --    | Intron  | SNP | 0.207 | 46 | 12 |
| <i>SEC11A</i>    | chr15 | 85216874 | G | A    | --     | --    | Intron  | SNP | 0.231 | 30 | 9  |
| <i>SEC11A</i>    | chr15 | 85225712 | C | T    | --     | --    | Intron  | SNP | 0.400 | 24 | 16 |
| <i>SEC11A</i>    | chr15 | 85242547 | C | A    | --     | --    | Intron  | SNP | 0.190 | 17 | 4  |
| <i>SEC11A</i>    | chr15 | 85248910 | A | C    | --     | --    | Intron  | SNP | 0.194 | 25 | 6  |
| --               | chr15 | 85267506 | C | T    | --     | --    | IGR     | SNP | 0.190 | 17 | 4  |
| --               | chr15 | 85276928 | G | T    | --     | --    | IGR     | SNP | 0.174 | 19 | 4  |
| <i>PDE8A</i>     | chr15 | 85626730 | T | G    | --     | --    | Intron  | SNP | 0.532 | 22 | 25 |
| --               | chr15 | 85715600 | G | A    | --     | --    | IGR     | SNP | 0.143 | 36 | 6  |
| --               | chr15 | 85814624 | T | C    | --     | --    | IGR     | SNP | 0.217 | 18 | 5  |
| <i>AKAP13</i>    | chr15 | 86148756 | G | A    | --     | --    | Intron  | SNP | 0.250 | 45 | 15 |
| <i>AKAP13</i>    | chr15 | 86280583 | T | C    | --     | --    | Intron  | SNP | 0.590 | 16 | 23 |
| <i>KLHL25</i>    | chr15 | 86318081 | A | C    | --     | --    | Intron  | SNP | 0.167 | 30 | 6  |
| <i>AGBL1</i>     | chr15 | 86887307 | T | C    | --     | --    | Intron  | SNP | 0.233 | 56 | 17 |
| <i>AGBL1</i>     | chr15 | 86908273 | - | TATA | --     | --    | Intron  | INS | 0.150 | 17 | 3  |
| <i>AGBL1</i>     | chr15 | 86932666 | C | T    | --     | --    | Intron  | SNP | 0.435 | 26 | 20 |
| <i>AGBL1</i>     | chr15 | 86942118 | A | G    | --     | --    | Intron  | SNP | 0.250 | 33 | 11 |
| <i>AGBL1</i>     | chr15 | 86962643 | A | C    | --     | --    | Intron  | SNP | 0.500 | 27 | 27 |
| <i>AGBL1</i>     | chr15 | 87025407 | C | A    | --     | --    | Intron  | SNP | 0.529 | 24 | 27 |
| <i>AGBL1</i>     | chr15 | 87059100 | A | C    | --     | --    | Intron  | SNP | 0.508 | 30 | 31 |
| <i>AGBL1</i>     | chr15 | 87186242 | C | G    | --     | --    | Intron  | SNP | 0.500 | 23 | 23 |
| <i>AGBL1</i>     | chr15 | 87352435 | T | C    | --     | --    | Intron  | SNP | 0.581 | 18 | 25 |

|           |       |          |        |       |      |      |                 |     |       |    |    |
|-----------|-------|----------|--------|-------|------|------|-----------------|-----|-------|----|----|
| AGBL1     | chr15 | 87495664 | A      | T     | --   | --   | Intron          | SNP | 0.313 | 22 | 10 |
| --        | chr15 | 87628193 | C      | A     | --   | --   | IGR             | SNP | 0.472 | 28 | 25 |
| --        | chr15 | 87654345 | G      | A     | --   | --   | IGR             | SNP | 0.435 | 26 | 20 |
| --        | chr15 | 87692358 | C      | A     | --   | --   | IGR             | SNP | 0.184 | 40 | 9  |
| --        | chr15 | 87712567 | C      | A     | --   | --   | IGR             | SNP | 0.227 | 58 | 17 |
| --        | chr15 | 87744696 | T      | C     | --   | --   | IGR             | SNP | 0.167 | 25 | 5  |
| --        | chr15 | 87754401 | T      | A     | --   | --   | IGR             | SNP | 0.150 | 34 | 6  |
| --        | chr15 | 87824252 | C      | T     | --   | --   | IGR             | SNP | 0.421 | 11 | 8  |
| --        | chr15 | 87827262 | T      | G     | --   | --   | IGR             | SNP | 0.648 | 19 | 35 |
| --        | chr15 | 87842432 | TC     | -     | --   | --   | IGR             | DEL | 0.368 | 24 | 14 |
| --        | chr15 | 87907985 | G      | A     | --   | --   | IGR             | SNP | 0.214 | 33 | 9  |
| --        | chr15 | 87916215 | A      | T     | --   | --   | IGR             | SNP | 0.333 | 36 | 18 |
| LINC00052 | chr15 | 88122289 | C      | T     | --   | --   | RNA             | SNP | 0.444 | 20 | 16 |
| --        | chr15 | 88187602 | G      | T     | --   | --   | IGR             | SNP | 0.238 | 64 | 20 |
| --        | chr15 | 88365364 | C      | T     | --   | --   | IGR             | SNP | 0.473 | 29 | 26 |
| --        | chr15 | 88410927 | G      | A     | --   | --   | IGR             | SNP | 0.308 | 27 | 12 |
| NTRK3     | chr15 | 88437737 | C      | T     | --   | --   | Intron          | SNP | 0.154 | 55 | 10 |
| NTRK3     | chr15 | 88521696 | G      | A     | --   | --   | 3'UTR           | SNP | 0.507 | 36 | 37 |
| NTRK3     | chr15 | 88526037 | C      | A     | --   | --   | Intron          | SNP | 0.293 | 29 | 12 |
| NTRK3     | chr15 | 88587510 | G      | T     | --   | --   | Intron          | SNP | 0.267 | 11 | 4  |
| NTRK3     | chr15 | 88625367 | G      | T     | --   | --   | Intron          | SNP | 0.172 | 24 | 5  |
| --        | chr15 | 88926496 | A      | G     | --   | --   | IGR             | SNP | 0.159 | 58 | 11 |
| --        | chr15 | 89036111 | T      | C     | --   | --   | IGR             | SNP | 0.152 | 39 | 7  |
| --        | chr15 | 89117552 | G      | T     | --   | --   | IGR             | SNP | 0.192 | 63 | 15 |
| --        | chr15 | 89486036 | T      | A     | --   | --   | IGR             | SNP | 0.161 | 26 | 5  |
| --        | chr15 | 89555010 | T      | G     | --   | --   | IGR             | SNP | 0.135 | 45 | 7  |
| ABHD2     | chr15 | 89706307 | A      | T     | --   | --   | Intron          | SNP | 0.167 | 55 | 11 |
| FANCI     | chr15 | 89818335 | C      | T     | --   | --   | Intron          | SNP | 0.167 | 20 | 4  |
| LOC283761 | chr15 | 90054747 | G      | A     | --   | --   | RNA             | SNP | 0.136 | 51 | 8  |
| C15orf42  | chr15 | 90128192 | C      | G     | --   | --   | Intron          | SNP | 0.543 | 16 | 19 |
| --        | chr15 | 90296326 | T      | A     | --   | --   | IGR             | SNP | 0.294 | 24 | 10 |
| --        | chr15 | 90507017 | G      | C     | --   | --   | IGR             | SNP | 0.379 | 59 | 36 |
| --        | chr15 | 90862431 | C      | T     | --   | --   | IGR             | SNP | 0.580 | 21 | 29 |
| IQGAP1    | chr15 | 90952271 | A      | G     | --   | --   | Intron          | SNP | 0.170 | 44 | 9  |
| IQGAP1    | chr15 | 91001969 | A      | T     | --   | --   | Intron          | SNP | 0.118 | 60 | 8  |
| --        | chr15 | 91192330 | C      | T     | --   | --   | IGR             | SNP | 0.111 | 32 | 4  |
| BLM       | chr15 | 91302635 | T      | A     | --   | --   | Intron          | SNP | 0.179 | 23 | 5  |
| --        | chr15 | 91389670 | G      | T     | --   | --   | IGR             | SNP | 0.294 | 12 | 5  |
| FES       | chr15 | 91428351 | C      | G     | C76G | L26V | Missense_mutati | SNP | 0.177 | 65 | 14 |
| SV2B      | chr15 | 91737230 | -      | TTTTG | --   | --   | Intron          | INS | 0.431 | 29 | 22 |
| SV2B      | chr15 | 91833609 | C      | T     | --   | --   | Intron          | SNP | 0.404 | 28 | 19 |
| --        | chr15 | 92126594 | C      | T     | --   | --   | IGR             | SNP | 0.381 | 13 | 8  |
| --        | chr15 | 92216202 | T      | A     | --   | --   | IGR             | SNP | 0.172 | 53 | 11 |
| SLCO3A1   | chr15 | 92445214 | G      | T     | --   | --   | Intron          | SNP | 0.109 | 41 | 5  |
| SLCO3A1   | chr15 | 92600518 | C      | A     | --   | --   | Intron          | SNP | 0.196 | 45 | 11 |
| --        | chr15 | 92761125 | C      | T     | --   | --   | IGR             | SNP | 0.478 | 24 | 22 |
| --        | chr15 | 92859439 | C      | A     | --   | --   | IGR             | SNP | 0.538 | 30 | 35 |
| --        | chr15 | 93306407 | T      | C     | --   | --   | IGR             | SNP | 0.188 | 13 | 3  |
| --        | chr15 | 93367254 | G      | A     | --   | --   | IGR             | SNP | 0.167 | 20 | 4  |
| CHD2      | chr15 | 93475112 | G      | T     | --   | --   | Intron          | SNP | 0.167 | 20 | 4  |
| CHD2      | chr15 | 93536293 | A      | T     | --   | --   | Intron          | SNP | 0.178 | 60 | 13 |
| --        | chr15 | 93670737 | C      | T     | --   | --   | IGR             | SNP | 0.382 | 42 | 26 |
| --        | chr15 | 93763116 | G      | A     | --   | --   | IGR             | SNP | 0.432 | 25 | 19 |
| --        | chr15 | 93786896 | G      | A     | --   | --   | IGR             | SNP | 0.129 | 61 | 9  |
| --        | chr15 | 93858887 | T      | C     | --   | --   | IGR             | SNP | 0.150 | 51 | 9  |
| --        | chr15 | 94190304 | C      | T     | --   | --   | IGR             | SNP | 0.431 | 37 | 28 |
| --        | chr15 | 94271414 | AC     | -     | --   | --   | IGR             | DEL | 0.135 | 32 | 5  |
| --        | chr15 | 94294403 | A      | G     | --   | --   | IGR             | SNP | 0.250 | 36 | 12 |
| --        | chr15 | 94307028 | G      | C     | --   | --   | IGR             | SNP | 0.193 | 46 | 11 |
| --        | chr15 | 94502527 | T      | A     | --   | --   | IGR             | SNP | 0.290 | 22 | 9  |
| --        | chr15 | 94549187 | G      | C     | --   | --   | IGR             | SNP | 0.229 | 54 | 16 |
| --        | chr15 | 94581634 | T      | A     | --   | --   | IGR             | SNP | 0.444 | 40 | 32 |
| --        | chr15 | 94691130 | T      | G     | --   | --   | IGR             | SNP | 0.200 | 16 | 4  |
| --        | chr15 | 94794558 | A      | A     | --   | --   | IGR             | SNP | 0.585 | 17 | 24 |
| --        | chr15 | 94825480 | CTCTTT | -     | --   | --   | IGR             | DEL | 0.383 | 29 | 18 |
| --        | chr15 | 95054398 | A      | G     | --   | --   | IGR             | SNP | 0.456 | 37 | 31 |
| --        | chr15 | 95110164 | G      | C     | --   | --   | IGR             | SNP | 0.510 | 25 | 26 |
| --        | chr15 | 95185955 | A      | C     | --   | --   | IGR             | SNP | 0.481 | 28 | 26 |
| --        | chr15 | 95376727 | T      | A     | --   | --   | IGR             | SNP | 0.403 | 37 | 25 |
| --        | chr15 | 95592986 | A      | T     | --   | --   | IGR             | SNP | 0.478 | 35 | 32 |
| --        | chr15 | 95602290 | TC     | -     | --   | --   | IGR             | DEL | 0.217 | 65 | 18 |
| --        | chr15 | 95608823 | A      | G     | --   | --   | IGR             | SNP | 0.300 | 28 | 12 |
| --        | chr15 | 95635694 | T      | C     | --   | --   | IGR             | SNP | 0.100 | 36 | 4  |
| LOC400456 | chr15 | 95831829 | T      | G     | --   | --   | RNA             | SNP | 0.192 | 42 | 10 |
| --        | chr15 | 95897589 | T      | A     | --   | --   | IGR             | SNP | 0.284 | 53 | 21 |
| --        | chr15 | 96113862 | C      | G     | --   | --   | IGR             | SNP | 0.100 | 27 | 3  |
| --        | chr15 | 96243319 | CA     | -     | --   | --   | IGR             | DEL | 0.177 | 51 | 11 |
| --        | chr15 | 96341255 | C      | T     | --   | --   | IGR             | SNP | 0.333 | 8  | 4  |
| --        | chr15 | 96372089 | C      | A     | --   | --   | IGR             | SNP | 0.286 | 10 | 4  |
| --        | chr15 | 96834545 | G      | A     | --   | --   | IGR             | SNP | 0.125 | 21 | 3  |

|             |       |           |     |     |        |       |                 |     |       |    |    |
|-------------|-------|-----------|-----|-----|--------|-------|-----------------|-----|-------|----|----|
| --          | chr15 | 97476492  | G   | C   | --     | --    | IGR             | SNP | 0.481 | 27 | 25 |
| --          | chr15 | 97478086  | GTC | -   | --     | --    | IGR             | DEL | 0.452 | 17 | 14 |
| --          | chr15 | 97547298  | T   | G   | --     | --    | IGR             | SNP | 0.283 | 33 | 13 |
| --          | chr15 | 97583801  | A   | G   | --     | --    | IGR             | SNP | 0.233 | 33 | 10 |
| --          | chr15 | 97658855  | C   | T   | --     | --    | IGR             | SNP | 0.587 | 26 | 37 |
| --          | chr15 | 97769933  | A   | G   | --     | --    | IGR             | SNP | 0.522 | 22 | 24 |
| --          | chr15 | 97788295  | C   | T   | --     | --    | IGR             | SNP | 0.429 | 24 | 18 |
| --          | chr15 | 97924899  | C   | T   | --     | --    | IGR             | SNP | 0.405 | 25 | 17 |
| --          | chr15 | 97978214  | -   | AAG | --     | --    | IGR             | INS | 0.143 | 18 | 3  |
| --          | chr15 | 97998132  | C   | T   | --     | --    | IGR             | SNP | 0.333 | 40 | 20 |
| --          | chr15 | 98142179  | T   | C   | --     | --    | IGR             | SNP | 0.448 | 37 | 30 |
| LOC91948    | chr15 | 98290771  | G   | T   | --     | --    | RNA             | SNP | 0.320 | 34 | 16 |
| LOC91948    | chr15 | 98370228  | G   | T   | --     | --    | RNA             | SNP | 0.118 | 45 | 6  |
| --          | chr15 | 98635206  | -   | GC  | --     | --    | IGR             | INS | 0.105 | 17 | 2  |
| --          | chr15 | 98951726  | C   | T   | --     | --    | IGR             | SNP | 0.245 | 40 | 13 |
| --          | chr15 | 98951733  | C   | T   | --     | --    | IGR             | SNP | 0.283 | 33 | 13 |
| --          | chr15 | 99095623  | C   | T   | --     | --    | IGR             | SNP | 0.641 | 14 | 25 |
| IGF1R       | chr15 | 99372271  | T   | C   | --     | --    | Intron          | SNP | 0.245 | 40 | 13 |
| IGF1R       | chr15 | 99435783  | C   | T   | --     | --    | Intron          | SNP | 0.371 | 22 | 13 |
| SYNM        | chr15 | 99657536  | G   | A   | --     | --    | Intron          | SNP | 0.478 | 36 | 33 |
| MEF2A       | chr15 | 100200722 | A   | G   | --     | --    | Intron          | SNP | 0.429 | 36 | 27 |
| --          | chr15 | 100505984 | G   | T   | --     | --    | IGR             | SNP | 0.286 | 20 | 8  |
| --          | chr15 | 101095646 | -   | AC  | --     | --    | IGR             | INS | 0.314 | 24 | 11 |
| --          | chr15 | 101097203 | A   | G   | --     | --    | IGR             | SNP | 0.148 | 23 | 4  |
| --          | chr15 | 101212993 | G   | T   | --     | --    | IGR             | SNP | 0.263 | 14 | 5  |
| --          | chr15 | 101239235 | TAG | -   | --     | --    | IGR             | DEL | 0.118 | 15 | 2  |
| --          | chr15 | 101682994 | C   | G   | --     | --    | IGR             | SNP | 0.458 | 32 | 27 |
| CHSY1       | chr15 | 101742318 | G   | C   | --     | --    | Intron          | SNP | 0.119 | 52 | 7  |
| --          | chr15 | 102073348 | C   | A   | --     | --    | IGR             | SNP | 0.184 | 62 | 14 |
| TARSL2      | chr15 | 102198535 | G   | A   | --     | --    | Intron          | SNP | 0.182 | 18 | 4  |
| --          | chr15 | 102268821 | G   | A   | --     | --    | IGR             | SNP | 0.156 | 27 | 5  |
| --          | chr15 | 102282561 | C   | T   | --     | --    | IGR             | SNP | 0.120 | 22 | 3  |
| --          | chr15 | 102288408 | G   | T   | --     | --    | IGR             | SNP | 0.183 | 58 | 13 |
| --          | chr15 | 102294380 | T   | G   | --     | --    | IGR             | SNP | 0.188 | 26 | 6  |
| --          | chr15 | 102300068 | C   | T   | --     | --    | IGR             | SNP | 0.158 | 32 | 6  |
| --          | chr15 | 102300133 | C   | G   | --     | --    | IGR             | SNP | 0.130 | 20 | 3  |
| --          | chr15 | 102300341 | C   | T   | --     | --    | IGR             | SNP | 0.138 | 25 | 4  |
| --          | chr15 | 102300350 | G   | A   | --     | --    | IGR             | SNP | 0.233 | 23 | 7  |
| --          | chr15 | 102303223 | C   | G   | --     | --    | IGR             | SNP | 0.302 | 67 | 29 |
| --          | chr15 | 102312272 | C   | A   | --     | --    | IGR             | SNP | 0.105 | 34 | 4  |
| --          | chr15 | 102421632 | T   | C   | --     | --    | IGR             | SNP | 0.389 | 11 | 7  |
| --          | chr15 | 102434267 | G   | A   | --     | --    | IGR             | SNP | 0.378 | 23 | 14 |
| --          | chr15 | 102499374 | C   | T   | --     | --    | IGR             | SNP | 0.138 | 25 | 4  |
| DDX11L10    | chr16 | 61174     | G   | A   | --     | --    | 5'Flank         | SNP | 0.105 | 51 | 6  |
| DDX11L10    | chr16 | 63175     | A   | G   | --     | --    | RNA             | SNP | 0.353 | 11 | 6  |
| NPRL3       | chr16 | 174064    | AG  | -   | --     | --    | Intron          | DEL | 0.110 | 81 | 10 |
| NPRL3       | chr16 | 177672    | G   | T   | --     | --    | Intron          | SNP | 0.211 | 15 | 4  |
| NPRL3       | chr16 | 188987    | G   | A   | --     | --    | 5'Flank         | SNP | 0.424 | 19 | 14 |
| AXIN1       | chr16 | 345108    | C   | T   | --     | --    | Intron          | SNP | 0.417 | 7  | 5  |
| RAB11FIP3   | chr16 | 512695    | T   | C   | --     | --    | Intron          | SNP | 0.149 | 57 | 10 |
| RAB11FIP3   | chr16 | 518046    | A   | T   | --     | --    | Intron          | SNP | 0.250 | 15 | 5  |
| RAB40C      | chr16 | 663004    | CA  | -   | --     | --    | Intron          | DEL | 0.103 | 26 | 3  |
| LMF1        | chr16 | 907531    | A   | T   | --     | --    | Intron          | SNP | 0.107 | 50 | 6  |
| LMF1        | chr16 | 907822    | A   | C   | --     | --    | Intron          | SNP | 0.157 | 59 | 11 |
| LMF1        | chr16 | 1010703   | GAC | -   | --     | --    | Intron          | DEL | 0.125 | 14 | 2  |
| --          | chr16 | 1091214   | T   | C   | --     | --    | IGR             | SNP | 0.320 | 17 | 8  |
| C1QTNF8     | chr16 | 1143139   | A   | G   | --     | --    | Intron          | SNP | 0.123 | 64 | 9  |
| CACNA1H     | chr16 | 1202582   | G   | T   | --     | --    | 5'Flank         | SNP | 0.211 | 15 | 4  |
| CACNA1H     | chr16 | 1243530   | G   | A   | --     | --    | Intron          | SNP | 0.533 | 28 | 32 |
| HN1L        | chr16 | 1734381   | A   | T   | --     | --    | Intron          | SNP | 0.256 | 32 | 11 |
| NUBP2       | chr16 | 1834882   | AT  | -   | --     | --    | Intron          | DEL | 0.118 | 15 | 2  |
| --          | chr16 | 1854474   | C   | A   | --     | --    | IGR             | SNP | 0.528 | 25 | 28 |
| TSC2        | chr16 | 2108653   | G   | A   | --     | --    | Intron          | SNP | 0.244 | 34 | 11 |
| ABCA17P     | chr16 | 2397617   | G   | T   | --     | --    | RNA             | SNP | 0.300 | 7  | 3  |
| ABCA17P     | chr16 | 2399583   | C   | T   | --     | --    | RNA             | SNP | 0.268 | 30 | 11 |
| ABCA17P     | chr16 | 2450096   | C   | T   | --     | --    | RNA             | SNP | 0.143 | 24 | 4  |
| FLYWCH2     | chr16 | 2937334   | G   | T   | --     | --    | Intron          | SNP | 0.222 | 14 | 4  |
| FLYWCH1     | chr16 | 2978353   | G   | A   | --     | --    | Intron          | SNP | 0.242 | 50 | 16 |
| --          | chr16 | 3136684   | G   | T   | --     | --    | IGR             | SNP | 0.217 | 47 | 13 |
| --          | chr16 | 3172174   | G   | T   | --     | --    | IGR             | SNP | 0.118 | 30 | 4  |
| --          | chr16 | 3207457   | C   | G   | --     | --    | IGR             | SNP | 0.474 | 20 | 18 |
| --          | chr16 | 3310696   | A   | T   | --     | --    | IGR             | SNP | 0.315 | 37 | 17 |
| ZNF263      | chr16 | 3339870   | C   | T   | C1364T | T455I | Missense_mutati | SNP | 0.609 | 25 | 39 |
| --          | chr16 | 3691907   | C   | G   | --     | --    | IGR             | SNP | 0.113 | 55 | 7  |
| --          | chr16 | 4231192   | C   | G   | --     | --    | IGR             | SNP | 0.500 | 2  | 2  |
| LOC1005075C | chr16 | 4302367   | T   | A   | --     | --    | RNA             | SNP | 0.143 | 18 | 3  |
| TFAP4       | chr16 | 4307931   | C   | G   | --     | --    | 3'UTR           | SNP | 0.340 | 35 | 18 |
| --          | chr16 | 4353510   | T   | C   | --     | --    | IGR             | SNP | 0.150 | 34 | 6  |
| CORO7,CORO7 | chr16 | 4437599   | C   | T   | --     | --    | Intron          | SNP | 0.150 | 34 | 6  |
| MGRN1       | chr16 | 4682655   | A   | C   | --     | --    | Intron          | SNP | 0.119 | 37 | 5  |

|         |       |          |     |   |    |    |        |     |       |    |    |
|---------|-------|----------|-----|---|----|----|--------|-----|-------|----|----|
| ZNF500  | chr16 | 4813431  | G   | A | -- | -- | Intron | SNP | 0.200 | 24 | 6  |
| NAGPA   | chr16 | 5078225  | A   | C | -- | -- | Intron | SNP | 0.129 | 27 | 4  |
| --      | chr16 | 5155175  | G   | A | -- | -- | IGR    | SNP | 0.196 | 41 | 10 |
| --      | chr16 | 5155201  | A   | G | -- | -- | IGR    | SNP | 0.125 | 49 | 7  |
| --      | chr16 | 5155369  | T   | C | -- | -- | IGR    | SNP | 0.189 | 43 | 10 |
| --      | chr16 | 5155385  | T   | A | -- | -- | IGR    | SNP | 0.185 | 44 | 10 |
| --      | chr16 | 5200185  | G   | A | -- | -- | IGR    | SNP | 0.111 | 32 | 4  |
| --      | chr16 | 5214158  | C   | G | -- | -- | IGR    | SNP | 0.180 | 41 | 9  |
| --      | chr16 | 5295675  | G   | A | -- | -- | IGR    | SNP | 0.120 | 22 | 3  |
| --      | chr16 | 5303411  | C   | T | -- | -- | IGR    | SNP | 0.357 | 9  | 5  |
| --      | chr16 | 5571477  | C   | T | -- | -- | IGR    | SNP | 0.659 | 14 | 27 |
| --      | chr16 | 5717170  | G   | T | -- | -- | IGR    | SNP | 0.250 | 30 | 10 |
| --      | chr16 | 5987702  | T   | C | -- | -- | IGR    | SNP | 0.643 | 5  | 9  |
| --      | chr16 | 6001170  | C   | T | -- | -- | IGR    | SNP | 0.200 | 40 | 10 |
| RBFOX1  | chr16 | 6209191  | C   | A | -- | -- | Intron | SNP | 0.600 | 20 | 30 |
| RBFOX1  | chr16 | 6314353  | C   | A | -- | -- | Intron | SNP | 0.308 | 36 | 16 |
| RBFOX1  | chr16 | 6384818  | A   | T | -- | -- | Intron | SNP | 0.286 | 45 | 18 |
| RBFOX1  | chr16 | 6429677  | G   | T | -- | -- | Intron | SNP | 0.500 | 6  | 6  |
| RBFOX1  | chr16 | 6440514  | G   | A | -- | -- | Intron | SNP | 0.333 | 26 | 13 |
| RBFOX1  | chr16 | 6549598  | G   | A | -- | -- | Intron | SNP | 0.306 | 34 | 15 |
| RBFOX1  | chr16 | 6605151  | C   | T | -- | -- | Intron | SNP | 0.394 | 20 | 13 |
| RBFOX1  | chr16 | 6631169  | G   | A | -- | -- | Intron | SNP | 0.188 | 26 | 6  |
| RBFOX1  | chr16 | 6645861  | G   | A | -- | -- | Intron | SNP | 0.357 | 18 | 10 |
| RBFOX1  | chr16 | 6788781  | G   | A | -- | -- | Intron | SNP | 0.135 | 45 | 7  |
| RBFOX1  | chr16 | 6790184  | C   | G | -- | -- | Intron | SNP | 0.114 | 31 | 4  |
| RBFOX1  | chr16 | 7010643  | C   | A | -- | -- | Intron | SNP | 0.189 | 43 | 10 |
| RBFOX1  | chr16 | 7119840  | C   | A | -- | -- | Intron | SNP | 0.314 | 35 | 16 |
| RBFOX1  | chr16 | 7157226  | T   | G | -- | -- | Intron | SNP | 0.208 | 19 | 5  |
| RBFOX1  | chr16 | 7289576  | T   | C | -- | -- | Intron | SNP | 0.308 | 27 | 12 |
| RBFOX1  | chr16 | 7325022  | G   | C | -- | -- | Intron | SNP | 0.357 | 36 | 20 |
| RBFOX1  | chr16 | 7384584  | G   | T | -- | -- | Intron | SNP | 0.119 | 37 | 5  |
| RBFOX1  | chr16 | 7442944  | G   | A | -- | -- | Intron | SNP | 0.311 | 31 | 14 |
| RBFOX1  | chr16 | 7469848  | T   | C | -- | -- | Intron | SNP | 0.475 | 21 | 19 |
| RBFOX1  | chr16 | 7506407  | G   | A | -- | -- | Intron | SNP | 0.286 | 30 | 12 |
| RBFOX1  | chr16 | 7509162  | G   | C | -- | -- | Intron | SNP | 0.623 | 20 | 33 |
| RBFOX1  | chr16 | 7639037  | T   | A | -- | -- | Intron | SNP | 0.350 | 26 | 14 |
| --      | chr16 | 7836264  | G   | C | -- | -- | IGR    | SNP | 0.292 | 17 | 7  |
| --      | chr16 | 8135873  | A   | G | -- | -- | IGR    | SNP | 0.676 | 11 | 23 |
| --      | chr16 | 8210711  | G   | A | -- | -- | IGR    | SNP | 0.308 | 18 | 8  |
| --      | chr16 | 8305324  | GCA | - | -- | -- | IGR    | DEL | 0.114 | 39 | 5  |
| --      | chr16 | 8399401  | G   | T | -- | -- | IGR    | SNP | 0.655 | 10 | 19 |
| --      | chr16 | 8614824  | T   | A | -- | -- | IGR    | SNP | 0.132 | 46 | 7  |
| --      | chr16 | 8614840  | T   | G | -- | -- | IGR    | SNP | 0.121 | 29 | 4  |
| PMM2    | chr16 | 8936904  | C   | G | -- | -- | Intron | SNP | 0.118 | 30 | 4  |
| --      | chr16 | 9457195  | G   | T | -- | -- | IGR    | SNP | 0.333 | 20 | 10 |
| --      | chr16 | 9520566  | C   | T | -- | -- | IGR    | SNP | 0.256 | 29 | 10 |
| --      | chr16 | 9773877  | G   | A | -- | -- | IGR    | SNP | 0.205 | 31 | 8  |
| --      | chr16 | 9799378  | C   | A | -- | -- | IGR    | SNP | 0.566 | 23 | 30 |
| GRIN2A  | chr16 | 9949941  | T   | A | -- | -- | Intron | SNP | 0.355 | 20 | 11 |
| GRIN2A  | chr16 | 10093103 | T   | A | -- | -- | Intron | SNP | 0.347 | 32 | 17 |
| GRIN2A  | chr16 | 10132058 | A   | G | -- | -- | Intron | SNP | 0.200 | 40 | 10 |
| --      | chr16 | 10291006 | A   | T | -- | -- | IGR    | SNP | 0.310 | 20 | 9  |
| --      | chr16 | 10453305 | G   | A | -- | -- | IGR    | SNP | 0.545 | 15 | 18 |
| EMP2    | chr16 | 10637952 | C   | G | -- | -- | Intron | SNP | 0.278 | 26 | 10 |
| TEKT5   | chr16 | 10743469 | T   | G | -- | -- | Intron | SNP | 0.361 | 23 | 13 |
| --      | chr16 | 10809344 | G   | A | -- | -- | IGR    | SNP | 0.269 | 38 | 14 |
| CIITA   | chr16 | 10978989 | G   | C | -- | -- | Intron | SNP | 0.391 | 28 | 18 |
| CLEC16A | chr16 | 11211457 | T   | C | -- | -- | Intron | SNP | 0.488 | 21 | 20 |
| --      | chr16 | 11277599 | C   | T | -- | -- | IGR    | SNP | 0.167 | 20 | 4  |
| --      | chr16 | 11315027 | G   | A | -- | -- | IGR    | SNP | 0.593 | 24 | 35 |
| ZC3H7A  | chr16 | 11873686 | A   | C | -- | -- | Intron | SNP | 0.575 | 17 | 23 |
| BCAR4   | chr16 | 11917342 | G   | A | -- | -- | RNA    | SNP | 0.143 | 18 | 3  |
| RSL1D1  | chr16 | 11929879 | G   | C | -- | -- | 3'UTR  | SNP | 0.318 | 30 | 14 |
| GSPT1   | chr16 | 11985901 | C   | T | -- | -- | Intron | SNP | 0.167 | 45 | 9  |
| SNX29   | chr16 | 12198428 | T   | A | -- | -- | Intron | SNP | 0.200 | 24 | 6  |
| SNX29   | chr16 | 12214614 | G   | A | -- | -- | Intron | SNP | 0.250 | 39 | 13 |
| SNX29   | chr16 | 12423155 | G   | A | -- | -- | Intron | SNP | 0.182 | 27 | 6  |
| SNX29   | chr16 | 12574906 | G   | T | -- | -- | Intron | SNP | 0.192 | 63 | 15 |
| CPPED1  | chr16 | 12825933 | T   | C | -- | -- | Intron | SNP | 0.286 | 30 | 12 |
| CPPED1  | chr16 | 12825934 | C   | A | -- | -- | Intron | SNP | 0.286 | 30 | 12 |
| SHISA9  | chr16 | 13001535 | C   | G | -- | -- | Intron | SNP | 0.628 | 16 | 27 |
| SHISA9  | chr16 | 13060264 | T   | C | -- | -- | Intron | SNP | 0.310 | 29 | 13 |
| --      | chr16 | 13344915 | C   | A | -- | -- | IGR    | SNP | 0.587 | 19 | 27 |
| --      | chr16 | 13510633 | G   | A | -- | -- | IGR    | SNP | 0.273 | 8  | 3  |
| --      | chr16 | 13570595 | G   | T | -- | -- | IGR    | SNP | 0.235 | 13 | 4  |
| --      | chr16 | 13696775 | T   | A | -- | -- | IGR    | SNP | 0.422 | 26 | 19 |
| --      | chr16 | 13770752 | G   | T | -- | -- | IGR    | SNP | 0.258 | 46 | 16 |
| --      | chr16 | 13850384 | C   | A | -- | -- | IGR    | SNP | 0.212 | 26 | 7  |
| --      | chr16 | 13996639 | C   | A | -- | -- | IGR    | SNP | 0.167 | 25 | 5  |
| --      | chr16 | 14111747 | T   | A | -- | -- | IGR    | SNP | 0.192 | 21 | 5  |



|          |       |          |       |        |        |        |                 |     |       |    |    |
|----------|-------|----------|-------|--------|--------|--------|-----------------|-----|-------|----|----|
| --       | chr16 | 14411979 | A     | G      | --     | --     | IGR             | SNP | 0.370 | 29 | 17 |
| --       | chr16 | 14461094 | C     | A      | --     | --     | IGR             | SNP | 0.196 | 41 | 10 |
| --       | chr16 | 14461095 | A     | C      | --     | --     | IGR             | SNP | 0.204 | 39 | 10 |
| --       | chr16 | 14495470 | G     | A      | --     | --     | IGR             | SNP | 0.232 | 43 | 13 |
| --       | chr16 | 14863083 | ATG   | -      | --     | --     | IGR             | DEL | 0.105 | 17 | 2  |
| --       | chr16 | 14865266 | C     | G      | --     | --     | IGR             | SNP | 0.121 | 29 | 4  |
| --       | chr16 | 14865270 | C     | T      | --     | --     | IGR             | SNP | 0.118 | 30 | 4  |
| NOMO1    | chr16 | 14983049 | A     | T      | A3421T | I1141F | Missense_mutati | SNP | 0.240 | 19 | 6  |
| --       | chr16 | 15199092 | C     | T      | --     | --     | IGR             | SNP | 0.143 | 18 | 3  |
| --       | chr16 | 15209309 | A     | G      | --     | --     | IGR             | SNP | 0.313 | 11 | 5  |
| C16orf45 | chr16 | 15538302 | TG    | -      | --     | --     | Intron          | DEL | 0.311 | 31 | 14 |
| C16orf45 | chr16 | 15605896 | G     | A      | --     | --     | Intron          | SNP | 0.167 | 15 | 3  |
| MYH11    | chr16 | 15897945 | T     | G      | --     | --     | Intron          | SNP | 0.667 | 16 | 32 |
| ABCC6    | chr16 | 16298689 | C     | T      | --     | --     | Intron          | SNP | 0.357 | 9  | 5  |
| ABCC6    | chr16 | 16311128 | GT    | -      | --     | --     | Intron          | DEL | 0.174 | 19 | 4  |
| --       | chr16 | 16741255 | T     | A      | --     | --     | IGR             | SNP | 0.286 | 10 | 4  |
| --       | chr16 | 16990394 | T     | A      | --     | --     | IGR             | SNP | 0.196 | 37 | 9  |
| --       | chr16 | 17092261 | G     | T      | --     | --     | IGR             | SNP | 0.174 | 19 | 4  |
| --       | chr16 | 17152882 | G     | A      | --     | --     | IGR             | SNP | 0.200 | 36 | 9  |
| XYLT1    | chr16 | 17324337 | C     | G      | --     | --     | Intron          | SNP | 0.268 | 41 | 15 |
| --       | chr16 | 17578957 | G     | T      | --     | --     | IGR             | SNP | 0.115 | 23 | 3  |
| --       | chr16 | 17698910 | G     | A      | --     | --     | IGR             | SNP | 0.207 | 23 | 6  |
| --       | chr16 | 17808208 | A     | T      | --     | --     | IGR             | SNP | 0.324 | 23 | 11 |
| --       | chr16 | 18270100 | GGT   | -      | --     | --     | IGR             | DEL | 0.176 | 14 | 3  |
| --       | chr16 | 18382252 | G     | A      | --     | --     | IGR             | SNP | 0.304 | 16 | 7  |
| --       | chr16 | 18486787 | -     | AGGCCT | --     | --     | IGR             | INS | 0.103 | 35 | 4  |
| ABCC6P1  | chr16 | 18600654 | G     | C      | --     | --     | RNA             | SNP | 0.393 | 17 | 11 |
| --       | chr16 | 18732919 | AG    | -      | --     | --     | IGR             | DEL | 0.143 | 12 | 2  |
| --       | chr16 | 18956914 | A     | T      | --     | --     | IGR             | SNP | 0.370 | 29 | 17 |
| ITPR1PL2 | chr16 | 19124502 | A     | C      | --     | --     | 5'Flank         | SNP | 0.294 | 12 | 5  |
| IQCK     | chr16 | 19820420 | C     | G      | --     | --     | Intron          | SNP | 0.632 | 14 | 24 |
| GPR139   | chr16 | 20079601 | G     | T      | --     | --     | Intron          | SNP | 0.217 | 18 | 5  |
| --       | chr16 | 20127616 | G     | A      | --     | --     | IGR             | SNP | 0.343 | 23 | 12 |
| UMOD     | chr16 | 20358692 | G     | T      | --     | --     | Intron          | SNP | 0.125 | 21 | 3  |
| PDILT    | chr16 | 20411335 | CTCTA | -      | --     | --     | Intron          | DEL | 0.368 | 12 | 7  |
| ACSM5    | chr16 | 20424374 | C     | G      | --     | --     | Intron          | SNP | 0.636 | 12 | 21 |
| ACSM2A   | chr16 | 20481453 | G     | A      | --     | --     | Intron          | SNP | 0.212 | 26 | 7  |
| --       | chr16 | 21946671 | A     | G      | --     | --     | IGR             | SNP | 0.192 | 63 | 15 |
| UQCRC2   | chr16 | 21971680 | C     | T      | --     | --     | Intron          | SNP | 0.302 | 37 | 16 |
| PDZD9    | chr16 | 22000270 | G     | T      | --     | --     | Intron          | SNP | 0.160 | 21 | 4  |
| --       | chr16 | 22411962 | T     | A      | --     | --     | IGR             | SNP | 0.610 | 16 | 25 |
| --       | chr16 | 22635842 | G     | C      | --     | --     | IGR             | SNP | 0.368 | 24 | 14 |
| --       | chr16 | 23022917 | G     | C      | --     | --     | IGR             | SNP | 0.310 | 20 | 9  |
| --       | chr16 | 23242197 | C     | G      | --     | --     | IGR             | SNP | 0.281 | 23 | 9  |
| COG7     | chr16 | 23451406 | C     | A      | --     | --     | Intron          | SNP | 0.250 | 12 | 4  |
| PRKCB    | chr16 | 23850615 | G     | T      | --     | --     | Intron          | SNP | 0.273 | 8  | 3  |
| PRKCB    | chr16 | 23887027 | CAT   | -      | --     | --     | Intron          | DEL | 0.222 | 14 | 4  |
| PRKCB    | chr16 | 24093602 | G     | T      | --     | --     | Intron          | SNP | 0.435 | 26 | 20 |
| PRKCB    | chr16 | 24176775 | C     | A      | --     | --     | Intron          | SNP | 0.136 | 38 | 6  |
| TNRC6A   | chr16 | 24779937 | T     | A      | --     | --     | Intron          | SNP | 0.419 | 18 | 13 |
| ARHGAP17 | chr16 | 24958699 | C     | T      | --     | --     | Intron          | SNP | 0.186 | 48 | 11 |
| ARHGAP17 | chr16 | 24968706 | G     | A      | --     | --     | Intron          | SNP | 0.513 | 19 | 20 |
| ARHGAP17 | chr16 | 24972839 | A     | T      | --     | --     | Intron          | SNP | 0.333 | 10 | 5  |
| --       | chr16 | 25083543 | G     | A      | --     | --     | IGR             | SNP | 0.403 | 37 | 25 |
| --       | chr16 | 25083597 | T     | C      | --     | --     | IGR             | SNP | 0.606 | 13 | 20 |
| --       | chr16 | 25083631 | C     | T      | --     | --     | IGR             | SNP | 0.250 | 24 | 8  |
| LCMT1    | chr16 | 25171916 | A     | T      | --     | --     | Intron          | SNP | 0.211 | 30 | 8  |
| --       | chr16 | 25191169 | A     | C      | --     | --     | IGR             | SNP | 0.625 | 6  | 10 |
| --       | chr16 | 25292936 | C     | G      | --     | --     | IGR             | SNP | 0.692 | 8  | 18 |
| --       | chr16 | 25475437 | G     | C      | --     | --     | IGR             | SNP | 0.127 | 48 | 7  |
| --       | chr16 | 25671709 | T     | A      | --     | --     | IGR             | SNP | 0.235 | 26 | 8  |
| HS3ST4   | chr16 | 25752685 | G     | A      | --     | --     | Intron          | SNP | 0.286 | 10 | 4  |
| HS3ST4   | chr16 | 25833731 | C     | T      | --     | --     | Intron          | SNP | 0.632 | 14 | 24 |
| HS3ST4   | chr16 | 25863409 | A     | G      | --     | --     | Intron          | SNP | 0.250 | 30 | 10 |
| --       | chr16 | 26186879 | A     | T      | --     | --     | IGR             | SNP | 0.294 | 24 | 10 |
| --       | chr16 | 26511073 | C     | A      | --     | --     | IGR             | SNP | 0.564 | 17 | 22 |
| --       | chr16 | 26953614 | G     | T      | --     | --     | IGR             | SNP | 0.207 | 23 | 6  |
| --       | chr16 | 27164081 | C     | T      | --     | --     | IGR             | SNP | 0.344 | 21 | 11 |
| IL21R    | chr16 | 27416345 | A     | T      | --     | --     | Intron          | SNP | 0.412 | 10 | 7  |
| KIAA0556 | chr16 | 27606935 | G     | T      | --     | --     | Intron          | SNP | 0.271 | 43 | 16 |
| KIAA0556 | chr16 | 27606942 | A     | T      | --     | --     | Intron          | SNP | 0.241 | 44 | 14 |
| --       | chr16 | 27792827 | C     | T      | --     | --     | IGR             | SNP | 0.286 | 10 | 4  |
| GSG1L    | chr16 | 27830714 | C     | A      | --     | --     | Intron          | SNP | 0.373 | 32 | 19 |
| GSG1L    | chr16 | 28022283 | C     | A      | --     | --     | Intron          | SNP | 0.231 | 30 | 9  |
| --       | chr16 | 28228679 | C     | T      | --     | --     | IGR             | SNP | 0.309 | 38 | 17 |
| --       | chr16 | 28677296 | C     | T      | --     | --     | IGR             | SNP | 0.364 | 7  | 4  |
| --       | chr16 | 29178803 | C     | G      | --     | --     | IGR             | SNP | 0.115 | 23 | 3  |
| --       | chr16 | 29225590 | -     | CA     | --     | --     | IGR             | INS | 0.149 | 40 | 7  |
| --       | chr16 | 29421369 | G     | A      | --     | --     | IGR             | SNP | 0.190 | 17 | 4  |
| --       | chr16 | 29689050 | T     | C      | --     | --     | IGR             | SNP | 0.333 | 26 | 13 |

|            |       |          |        |      |    |    |         |     |       |    |    |
|------------|-------|----------|--------|------|----|----|---------|-----|-------|----|----|
| MVP        | chr16 | 29836236 | TC     | -    | -- | -- | Intron  | DEL | 0.111 | 24 | 3  |
| SEZ6L2     | chr16 | 29898807 | G      | T    | -- | -- | Intron  | SNP | 0.267 | 11 | 4  |
| ASPHD1,KCT | chr16 | 29917486 | G      | T    | -- | -- | 3'Flank | SNP | 0.286 | 10 | 4  |
| TMEM219    | chr16 | 29980445 | G      | A    | -- | -- | Intron  | SNP | 0.114 | 31 | 4  |
| DOC2A      | chr16 | 30022291 | G      | T    | -- | -- | 5'UTR   | SNP | 0.483 | 15 | 14 |
| CD2BP2     | chr16 | 30367104 | G      | A    | -- | -- | 5'Flank | SNP | 0.230 | 47 | 14 |
| --         | chr16 | 30608072 | G      | A    | -- | -- | IGR     | SNP | 0.250 | 27 | 9  |
| --         | chr16 | 30658614 | A      | G    | -- | -- | IGR     | SNP | 0.250 | 15 | 5  |
| --         | chr16 | 30658615 | G      | A    | -- | -- | IGR     | SNP | 0.167 | 15 | 3  |
| FBRS       | chr16 | 30682861 | T      | G    | -- | -- | 3'Flank | SNP | 0.263 | 14 | 5  |
| --         | chr16 | 31058479 | G      | A    | -- | -- | IGR     | SNP | 0.342 | 25 | 13 |
| ZNF668     | chr16 | 31079858 | TTA    | -    | -- | -- | Intron  | DEL | 0.143 | 12 | 2  |
| --         | chr16 | 31243189 | G      | A    | -- | -- | IGR     | SNP | 0.238 | 16 | 5  |
| --         | chr16 | 31253967 | G      | T    | -- | -- | IGR     | SNP | 0.714 | 14 | 35 |
| ITGAM      | chr16 | 31313729 | -      | TC   | -- | -- | Intron  | INS | 0.129 | 27 | 4  |
| --         | chr16 | 31354461 | -      | TAAC | -- | -- | IGR     | INS | 0.182 | 18 | 4  |
| --         | chr16 | 31678522 | C      | T    | -- | -- | IGR     | SNP | 0.640 | 9  | 16 |
| --         | chr16 | 31845406 | T      | G    | -- | -- | IGR     | SNP | 0.543 | 16 | 19 |
| --         | chr16 | 31846747 | T      | A    | -- | -- | IGR     | SNP | 0.211 | 45 | 12 |
| --         | chr16 | 31866293 | T      | C    | -- | -- | IGR     | SNP | 0.527 | 26 | 29 |
| --         | chr16 | 32100194 | T      | G    | -- | -- | IGR     | SNP | 0.115 | 46 | 6  |
| --         | chr16 | 32115445 | A      | G    | -- | -- | IGR     | SNP | 0.250 | 12 | 4  |
| --         | chr16 | 32115461 | A      | G    | -- | -- | IGR     | SNP | 0.167 | 20 | 4  |
| --         | chr16 | 32128718 | G      | T    | -- | -- | IGR     | SNP | 0.111 | 40 | 5  |
| --         | chr16 | 32130647 | C      | T    | -- | -- | IGR     | SNP | 0.135 | 32 | 5  |
| --         | chr16 | 32138033 | T      | G    | -- | -- | IGR     | SNP | 0.164 | 46 | 9  |
| --         | chr16 | 32149109 | C      | T    | -- | -- | IGR     | SNP | 0.227 | 17 | 5  |
| --         | chr16 | 32156601 | C      | A    | -- | -- | IGR     | SNP | 0.114 | 31 | 4  |
| --         | chr16 | 32192978 | A      | G    | -- | -- | IGR     | SNP | 0.333 | 6  | 3  |
| --         | chr16 | 32291639 | G      | T    | -- | -- | IGR     | SNP | 0.133 | 26 | 4  |
| --         | chr16 | 32370842 | G      | A    | -- | -- | IGR     | SNP | 0.182 | 18 | 4  |
| --         | chr16 | 32370872 | T      | C    | -- | -- | IGR     | SNP | 0.143 | 30 | 5  |
| --         | chr16 | 32437251 | -      | TC   | -- | -- | IGR     | INS | 0.115 | 69 | 9  |
| --         | chr16 | 32449244 | A      | T    | -- | -- | IGR     | SNP | 0.238 | 16 | 5  |
| --         | chr16 | 32449455 | ATGT   | -    | -- | -- | IGR     | DEL | 0.174 | 19 | 4  |
| --         | chr16 | 32474079 | G      | A    | -- | -- | IGR     | SNP | 0.130 | 67 | 10 |
| --         | chr16 | 32491853 | AGTT   | -    | -- | -- | IGR     | DEL | 0.136 | 19 | 3  |
| --         | chr16 | 32497421 | G      | C    | -- | -- | IGR     | SNP | 0.154 | 33 | 6  |
| --         | chr16 | 32501667 | TCA    | -    | -- | -- | IGR     | DEL | 0.123 | 50 | 7  |
| --         | chr16 | 32599131 | A      | T    | -- | -- | IGR     | SNP | 0.129 | 27 | 4  |
| --         | chr16 | 32836618 | A      | C    | -- | -- | IGR     | SNP | 0.154 | 22 | 4  |
| --         | chr16 | 32844615 | ATATAT | -    | -- | -- | IGR     | DEL | 0.105 | 68 | 8  |
| --         | chr16 | 32871441 | T      | A    | -- | -- | IGR     | SNP | 0.205 | 35 | 9  |
| --         | chr16 | 32905948 | C      | A    | -- | -- | IGR     | SNP | 0.111 | 32 | 4  |
| --         | chr16 | 32921036 | A      | G    | -- | -- | IGR     | SNP | 0.125 | 21 | 3  |
| --         | chr16 | 32940848 | G      | A    | -- | -- | IGR     | SNP | 0.229 | 27 | 8  |
| --         | chr16 | 33053427 | C      | T    | -- | -- | IGR     | SNP | 0.149 | 40 | 7  |
| --         | chr16 | 33058939 | C      | T    | -- | -- | IGR     | SNP | 0.136 | 19 | 3  |
| --         | chr16 | 33060697 | CT     | -    | -- | -- | IGR     | DEL | 0.118 | 30 | 4  |
| --         | chr16 | 33071004 | C      | T    | -- | -- | IGR     | SNP | 0.212 | 26 | 7  |
| --         | chr16 | 33085699 | T      | C    | -- | -- | IGR     | SNP | 0.233 | 23 | 7  |
| --         | chr16 | 33238760 | G      | A    | -- | -- | IGR     | SNP | 0.241 | 82 | 26 |
| --         | chr16 | 33317849 | C      | T    | -- | -- | IGR     | SNP | 0.300 | 28 | 12 |
| --         | chr16 | 33328821 | C      | T    | -- | -- | IGR     | SNP | 0.176 | 42 | 9  |
| --         | chr16 | 33336991 | A      | G    | -- | -- | IGR     | SNP | 0.103 | 26 | 3  |
| --         | chr16 | 33346137 | G      | C    | -- | -- | IGR     | SNP | 0.154 | 22 | 4  |
| --         | chr16 | 33346147 | A      | G    | -- | -- | IGR     | SNP | 0.133 | 26 | 4  |
| --         | chr16 | 33346159 | G      | A    | -- | -- | IGR     | SNP | 0.125 | 28 | 4  |
| --         | chr16 | 33363291 | C      | T    | -- | -- | IGR     | SNP | 0.290 | 22 | 9  |
| --         | chr16 | 33363309 | T      | C    | -- | -- | IGR     | SNP | 0.310 | 20 | 9  |
| --         | chr16 | 33404099 | G      | A    | -- | -- | IGR     | SNP | 0.120 | 22 | 3  |
| --         | chr16 | 33424166 | AAAAC  | -    | -- | -- | IGR     | DEL | 0.130 | 40 | 6  |
| --         | chr16 | 33493541 | C      | A    | -- | -- | IGR     | SNP | 0.101 | 80 | 9  |
| --         | chr16 | 33554298 | A      | T    | -- | -- | IGR     | SNP | 0.160 | 42 | 8  |
| --         | chr16 | 33588392 | G      | C    | -- | -- | IGR     | SNP | 0.121 | 51 | 7  |
| --         | chr16 | 33747132 | C      | T    | -- | -- | IGR     | SNP | 0.125 | 35 | 5  |
| --         | chr16 | 33834874 | -      | AAT  | -- | -- | IGR     | INS | 0.111 | 24 | 3  |
| --         | chr16 | 33841943 | G      | C    | -- | -- | IGR     | SNP | 0.114 | 31 | 4  |
| --         | chr16 | 33859612 | A      | G    | -- | -- | IGR     | SNP | 0.171 | 34 | 7  |
| --         | chr16 | 33979576 | T      | C    | -- | -- | IGR     | SNP | 0.127 | 62 | 9  |
| --         | chr16 | 34176731 | G      | T    | -- | -- | IGR     | SNP | 0.127 | 48 | 7  |
| --         | chr16 | 34221583 | G      | A    | -- | -- | IGR     | SNP | 0.471 | 18 | 16 |
| --         | chr16 | 34289491 | G      | A    | -- | -- | IGR     | SNP | 0.697 | 10 | 23 |
| --         | chr16 | 34652379 | G      | T    | -- | -- | IGR     | SNP | 0.349 | 28 | 15 |
| --         | chr16 | 34721027 | T      | C    | -- | -- | IGR     | SNP | 0.195 | 33 | 8  |
| --         | chr16 | 34728843 | A      | G    | -- | -- | IGR     | SNP | 0.286 | 25 | 10 |
| --         | chr16 | 34863273 | T      | G    | -- | -- | IGR     | SNP | 0.558 | 19 | 24 |
| FLJ26245   | chr16 | 34987231 | C      | G    | -- | -- | RNA     | SNP | 0.487 | 20 | 19 |
| --         | chr16 | 35039872 | C      | G    | -- | -- | IGR     | SNP | 0.349 | 28 | 15 |
| --         | chr16 | 35255483 | G      | C    | -- | -- | IGR     | SNP | 0.111 | 24 | 3  |

|                |       |          |      |     |    |    |        |     |       |    |    |
|----------------|-------|----------|------|-----|----|----|--------|-----|-------|----|----|
| --             | chr16 | 46470571 | A    | C   | -- | -- | IGR    | SNP | 0.167 | 25 | 5  |
| --             | chr16 | 46470614 | G    | T   | -- | -- | IGR    | SNP | 0.148 | 23 | 4  |
| --             | chr16 | 46479708 | G    | A   | -- | -- | IGR    | SNP | 0.136 | 19 | 3  |
| --             | chr16 | 46493333 | T    | C   | -- | -- | IGR    | SNP | 0.192 | 21 | 5  |
| --             | chr16 | 46494807 | T    | C   | -- | -- | IGR    | SNP | 0.182 | 18 | 4  |
| --             | chr16 | 46610980 | G    | C   | -- | -- | IGR    | SNP | 0.229 | 27 | 8  |
| --             | chr16 | 46832666 | G    | C   | -- | -- | IGR    | SNP | 0.286 | 20 | 8  |
| --             | chr16 | 46890459 | C    | T   | -- | -- | IGR    | SNP | 0.167 | 20 | 4  |
| --             | chr16 | 46890464 | C    | T   | -- | -- | IGR    | SNP | 0.174 | 19 | 4  |
| --             | chr16 | 46891470 | G    | C   | -- | -- | IGR    | SNP | 0.324 | 23 | 11 |
| <i>GPT2</i>    | chr16 | 46959515 | G    | A   | -- | -- | Intron | SNP | 0.237 | 29 | 9  |
| <i>DNAJA2</i>  | chr16 | 46989767 | T    | C   | -- | -- | 3'UTR  | SNP | 0.103 | 26 | 3  |
| <i>PHKB</i>    | chr16 | 47579138 | G    | T   | -- | -- | Intron | SNP | 0.211 | 15 | 4  |
| <i>PHKB</i>    | chr16 | 47643464 | -    | TTG | -- | -- | Intron | INS | 0.257 | 26 | 9  |
| --             | chr16 | 47778778 | A    | T   | -- | -- | IGR    | SNP | 0.419 | 18 | 13 |
| --             | chr16 | 47963477 | G    | A   | -- | -- | IGR    | SNP | 0.400 | 6  | 4  |
| --             | chr16 | 48746147 | C    | T   | -- | -- | IGR    | SNP | 0.188 | 52 | 12 |
| --             | chr16 | 48814961 | C    | G   | -- | -- | IGR    | SNP | 0.297 | 26 | 11 |
| --             | chr16 | 49060299 | G    | T   | -- | -- | IGR    | SNP | 0.179 | 32 | 7  |
| --             | chr16 | 49124218 | G    | A   | -- | -- | IGR    | SNP | 0.368 | 24 | 14 |
| --             | chr16 | 49205977 | A    | G   | -- | -- | IGR    | SNP | 0.370 | 17 | 10 |
| --             | chr16 | 49406149 | G    | A   | -- | -- | IGR    | SNP | 0.281 | 23 | 9  |
| <i>ZNF423</i>  | chr16 | 49603990 | GA   | -   | -- | -- | Intron | DEL | 0.257 | 26 | 9  |
| <i>ZNF423</i>  | chr16 | 49703879 | G    | C   | -- | -- | Intron | SNP | 0.702 | 14 | 33 |
| --             | chr16 | 49879007 | G    | T   | -- | -- | IGR    | SNP | 0.333 | 12 | 6  |
| --             | chr16 | 49881752 | G    | A   | -- | -- | IGR    | SNP | 0.308 | 27 | 12 |
| --             | chr16 | 49983626 | G    | C   | -- | -- | IGR    | SNP | 0.265 | 25 | 9  |
| --             | chr16 | 50412494 | C    | T   | -- | -- | IGR    | SNP | 0.306 | 34 | 15 |
| --             | chr16 | 50444769 | C    | T   | -- | -- | IGR    | SNP | 0.235 | 13 | 4  |
| <i>NKD1</i>    | chr16 | 50656608 | G    | A   | -- | -- | Intron | SNP | 0.333 | 46 | 23 |
| --             | chr16 | 50677358 | A    | T   | -- | -- | IGR    | SNP | 0.103 | 52 | 6  |
| --             | chr16 | 50856914 | G    | A   | -- | -- | IGR    | SNP | 0.231 | 30 | 9  |
| --             | chr16 | 50882503 | C    | G   | -- | -- | IGR    | SNP | 0.625 | 15 | 25 |
| --             | chr16 | 50973756 | C    | T   | -- | -- | IGR    | SNP | 0.590 | 16 | 23 |
| --             | chr16 | 50973955 | C    | A   | -- | -- | IGR    | SNP | 0.500 | 29 | 29 |
| --             | chr16 | 51035655 | C    | G   | -- | -- | IGR    | SNP | 0.400 | 18 | 12 |
| --             | chr16 | 51116266 | T    | C   | -- | -- | IGR    | SNP | 0.389 | 22 | 14 |
| --             | chr16 | 51256970 | C    | T   | -- | -- | IGR    | SNP | 0.750 | 5  | 15 |
| --             | chr16 | 51277577 | G    | T   | -- | -- | IGR    | SNP | 0.135 | 32 | 5  |
| --             | chr16 | 51304544 | G    | T   | -- | -- | IGR    | SNP | 0.732 | 11 | 30 |
| --             | chr16 | 51420595 | T    | C   | -- | -- | IGR    | SNP | 0.200 | 36 | 9  |
| --             | chr16 | 51422146 | C    | A   | -- | -- | IGR    | SNP | 0.243 | 28 | 9  |
| --             | chr16 | 51461967 | T    | C   | -- | -- | IGR    | SNP | 0.267 | 11 | 4  |
| --             | chr16 | 51630810 | T    | G   | -- | -- | IGR    | SNP | 0.167 | 25 | 5  |
| --             | chr16 | 51634033 | C    | T   | -- | -- | IGR    | SNP | 0.280 | 18 | 7  |
| --             | chr16 | 51679779 | C    | T   | -- | -- | IGR    | SNP | 0.526 | 9  | 10 |
| --             | chr16 | 51782022 | T    | G   | -- | -- | IGR    | SNP | 0.196 | 37 | 9  |
| --             | chr16 | 51863170 | G    | A   | -- | -- | IGR    | SNP | 0.310 | 29 | 13 |
| <i>TOX3</i>    | chr16 | 52474656 | C    | T   | -- | -- | Intron | SNP | 0.214 | 22 | 6  |
| <i>TOX3</i>    | chr16 | 52509026 | T    | C   | -- | -- | Intron | SNP | 0.227 | 34 | 10 |
| <i>TOX3</i>    | chr16 | 52509034 | G    | T   | -- | -- | Intron | SNP | 0.204 | 39 | 10 |
| <i>TOX3</i>    | chr16 | 52569150 | C    | G   | -- | -- | Intron | SNP | 0.571 | 27 | 36 |
| --             | chr16 | 52702665 | T    | G   | -- | -- | IGR    | SNP | 0.211 | 45 | 12 |
| --             | chr16 | 52849955 | G    | A   | -- | -- | IGR    | SNP | 0.273 | 24 | 9  |
| <i>CHD9</i>    | chr16 | 53158507 | C    | G   | -- | -- | Intron | SNP | 0.324 | 25 | 12 |
| <i>CHD9</i>    | chr16 | 53183634 | AAT  | -   | -- | -- | Intron | DEL | 0.125 | 14 | 2  |
| <i>CHD9</i>    | chr16 | 53195883 | C    | G   | -- | -- | Intron | SNP | 0.750 | 7  | 21 |
| <i>CHD9</i>    | chr16 | 53320288 | A    | G   | -- | -- | Intron | SNP | 0.286 | 20 | 8  |
| --             | chr16 | 53591071 | -    | TA  | -- | -- | IGR    | INS | 0.105 | 17 | 2  |
| <i>FTO</i>     | chr16 | 53997177 | C    | G   | -- | -- | Intron | SNP | 0.609 | 18 | 28 |
| --             | chr16 | 54198469 | G    | A   | -- | -- | IGR    | SNP | 0.333 | 12 | 6  |
| --             | chr16 | 54818029 | TACC | -   | -- | -- | IGR    | DEL | 0.167 | 24 | 5  |
| --             | chr16 | 55340409 | T    | C   | -- | -- | IGR    | SNP | 0.659 | 15 | 29 |
| --             | chr16 | 55638634 | C    | T   | -- | -- | IGR    | SNP | 0.200 | 16 | 4  |
| <i>SLC6A2</i>  | chr16 | 55695603 | G    | T   | -- | -- | Intron | SNP | 0.263 | 28 | 10 |
| <i>CES5A</i>   | chr16 | 55958334 | GAC  | -   | -- | -- | Intron | DEL | 0.111 | 16 | 2  |
| <i>AMFR</i>    | chr16 | 56425486 | C    | T   | -- | -- | Intron | SNP | 0.119 | 37 | 5  |
| <i>BBS2</i>    | chr16 | 56528061 | G    | T   | -- | -- | Intron | SNP | 0.176 | 14 | 3  |
| <i>BBS2</i>    | chr16 | 56552857 | G    | A   | -- | -- | Intron | SNP | 0.360 | 32 | 18 |
| --             | chr16 | 56617446 | G    | A   | -- | -- | IGR    | SNP | 0.214 | 33 | 9  |
| <i>SLC12A3</i> | chr16 | 56907620 | A    | T   | -- | -- | Intron | SNP | 0.294 | 12 | 5  |
| --             | chr16 | 56954667 | C    | A   | -- | -- | IGR    | SNP | 0.258 | 46 | 16 |
| <i>NLRC5</i>   | chr16 | 57076794 | C    | A   | -- | -- | Intron | SNP | 0.269 | 49 | 18 |
| <i>FAM192A</i> | chr16 | 57194224 | G    | A   | -- | -- | Intron | SNP | 0.179 | 23 | 5  |
| <i>RSPRY1</i>  | chr16 | 57240269 | G    | T   | -- | -- | Intron | SNP | 0.545 | 15 | 18 |
| <i>PLLP</i>    | chr16 | 57299095 | C    | G   | -- | -- | Intron | SNP | 0.288 | 42 | 17 |
| --             | chr16 | 57320131 | G    | C   | -- | -- | IGR    | SNP | 0.242 | 25 | 8  |
| --             | chr16 | 57534401 | C    | T   | -- | -- | IGR    | SNP | 0.522 | 11 | 12 |
| <i>CNGB1</i>   | chr16 | 57972540 | T    | C   | -- | -- | Intron | SNP | 0.216 | 40 | 11 |
| --             | chr16 | 58114228 | T    | C   | -- | -- | IGR    | SNP | 0.667 | 13 | 26 |

|             |       |          |     |    |    |    |         |     |       |    |    |
|-------------|-------|----------|-----|----|----|----|---------|-----|-------|----|----|
| --          | chr16 | 58367840 | G   | A  | -- | -- | IGR     | SNP | 0.158 | 16 | 3  |
| --          | chr16 | 58666638 | G   | C  | -- | -- | IGR     | SNP | 0.219 | 25 | 7  |
| SLC38A7     | chr16 | 58718897 | C   | G  | -- | -- | 5'Flank | SNP | 0.633 | 18 | 31 |
| --          | chr16 | 58838354 | T   | G  | -- | -- | IGR     | SNP | 0.278 | 13 | 5  |
| --          | chr16 | 59139720 | G   | A  | -- | -- | IGR     | SNP | 0.200 | 24 | 6  |
| --          | chr16 | 59213989 | C   | T  | -- | -- | IGR     | SNP | 0.675 | 13 | 27 |
| --          | chr16 | 59391598 | G   | T  | -- | -- | IGR     | SNP | 0.138 | 25 | 4  |
| --          | chr16 | 59866806 | CA  | -  | -- | -- | IGR     | DEL | 0.105 | 17 | 2  |
| --          | chr16 | 60114819 | C   | T  | -- | -- | IGR     | SNP | 0.136 | 19 | 3  |
| --          | chr16 | 60115735 | G   | A  | -- | -- | IGR     | SNP | 0.114 | 31 | 4  |
| --          | chr16 | 60132483 | A   | G  | -- | -- | IGR     | SNP | 0.688 | 10 | 22 |
| --          | chr16 | 60612763 | C   | G  | -- | -- | IGR     | SNP | 0.607 | 11 | 17 |
| --          | chr16 | 60623069 | C   | T  | -- | -- | IGR     | SNP | 0.432 | 21 | 16 |
| --          | chr16 | 60901781 | A   | C  | -- | -- | IGR     | SNP | 0.550 | 9  | 11 |
| --          | chr16 | 61125596 | A   | T  | -- | -- | IGR     | SNP | 0.211 | 30 | 8  |
| --          | chr16 | 61157863 | G   | A  | -- | -- | IGR     | SNP | 0.200 | 40 | 10 |
| --          | chr16 | 61214876 | A   | G  | -- | -- | IGR     | SNP | 0.696 | 17 | 39 |
| --          | chr16 | 61594731 | AT  | -  | -- | -- | IGR     | DEL | 0.132 | 33 | 5  |
| --          | chr16 | 61671850 | GTA | -  | -- | -- | IGR     | DEL | 0.118 | 15 | 2  |
| CDH8        | chr16 | 62053675 | C   | G  | -- | -- | Intron  | SNP | 0.652 | 16 | 30 |
| --          | chr16 | 62098919 | G   | C  | -- | -- | IGR     | SNP | 0.688 | 5  | 11 |
| --          | chr16 | 62180482 | C   | A  | -- | -- | IGR     | SNP | 0.500 | 5  | 5  |
| --          | chr16 | 62717750 | G   | C  | -- | -- | IGR     | SNP | 0.571 | 9  | 12 |
| --          | chr16 | 62954014 | A   | G  | -- | -- | IGR     | SNP | 0.667 | 3  | 6  |
| --          | chr16 | 63005809 | G   | A  | -- | -- | IGR     | SNP | 0.667 | 3  | 6  |
| --          | chr16 | 63186804 | G   | A  | -- | -- | IGR     | SNP | 0.500 | 2  | 2  |
| --          | chr16 | 63197557 | A   | C  | -- | -- | IGR     | SNP | 0.375 | 10 | 6  |
| --          | chr16 | 63475174 | T   | A  | -- | -- | IGR     | SNP | 0.267 | 11 | 4  |
| --          | chr16 | 63593354 | G   | T  | -- | -- | IGR     | SNP | 0.810 | 4  | 17 |
| --          | chr16 | 63875814 | T   | A  | -- | -- | IGR     | SNP | 0.182 | 36 | 8  |
| --          | chr16 | 64256083 | C   | T  | -- | -- | IGR     | SNP | 0.490 | 26 | 25 |
| --          | chr16 | 64290382 | C   | T  | -- | -- | IGR     | SNP | 0.469 | 26 | 23 |
| --          | chr16 | 64333379 | T   | A  | -- | -- | IGR     | SNP | 0.100 | 27 | 3  |
| --          | chr16 | 64392096 | T   | C  | -- | -- | IGR     | SNP | 0.500 | 22 | 22 |
| --          | chr16 | 64478922 | A   | T  | -- | -- | IGR     | SNP | 0.200 | 32 | 8  |
| --          | chr16 | 64677356 | C   | T  | -- | -- | IGR     | SNP | 0.256 | 29 | 10 |
| --          | chr16 | 64693417 | TC  | -  | -- | -- | IGR     | DEL | 0.143 | 23 | 4  |
| --          | chr16 | 64942292 | GT  | -  | -- | -- | IGR     | DEL | 0.415 | 24 | 17 |
| --          | chr16 | 64963712 | C   | T  | -- | -- | IGR     | SNP | 0.468 | 25 | 22 |
| CDH11       | chr16 | 64984207 | C   | A  | -- | -- | Intron  | SNP | 0.175 | 47 | 10 |
| CDH11       | chr16 | 64996016 | AT  | -  | -- | -- | Intron  | DEL | 0.313 | 33 | 15 |
| CDH11       | chr16 | 65082801 | T   | A  | -- | -- | Intron  | SNP | 0.563 | 21 | 27 |
| --          | chr16 | 65617164 | A   | G  | -- | -- | IGR     | SNP | 0.417 | 28 | 20 |
| --          | chr16 | 65748006 | G   | C  | -- | -- | IGR     | SNP | 0.522 | 22 | 24 |
| --          | chr16 | 66061998 | C   | T  | -- | -- | IGR     | SNP | 0.231 | 10 | 3  |
| --          | chr16 | 66102389 | A   | C  | -- | -- | IGR     | SNP | 0.333 | 46 | 23 |
| --          | chr16 | 66146689 | C   | T  | -- | -- | IGR     | SNP | 0.372 | 54 | 32 |
| --          | chr16 | 66346345 | TG  | -  | -- | -- | IGR     | DEL | 0.158 | 16 | 3  |
| BEAN1       | chr16 | 66509122 | T   | G  | -- | -- | Intron  | SNP | 0.108 | 33 | 4  |
| --          | chr16 | 66538136 | C   | T  | -- | -- | IGR     | SNP | 0.509 | 26 | 27 |
| --          | chr16 | 66538385 | G   | C  | -- | -- | IGR     | SNP | 0.161 | 26 | 5  |
| --          | chr16 | 66538394 | G   | A  | -- | -- | IGR     | SNP | 0.147 | 29 | 5  |
| --          | chr16 | 66538428 | G   | A  | -- | -- | IGR     | SNP | 0.172 | 24 | 5  |
| CKLF,CKLF-C | chr16 | 66589593 | C   | G  | -- | -- | Intron  | SNP | 0.375 | 40 | 24 |
| CES2        | chr16 | 66975555 | GCC | -  | -- | -- | Intron  | DEL | 0.351 | 37 | 20 |
| LRRC36      | chr16 | 67373526 | A   | T  | -- | -- | Intron  | SNP | 0.220 | 32 | 9  |
| --          | chr16 | 67560711 | G   | C  | -- | -- | IGR     | SNP | 0.176 | 56 | 12 |
| SLC12A4     | chr16 | 67999566 | C   | A  | -- | -- | Intron  | SNP | 0.180 | 41 | 9  |
| NFATC3      | chr16 | 68146199 | G   | T  | -- | -- | Intron  | SNP | 0.211 | 15 | 4  |
| --          | chr16 | 68296400 | A   | T  | -- | -- | IGR     | SNP | 0.509 | 28 | 29 |
| SLC7A6OS    | chr16 | 68337435 | C   | G  | -- | -- | Intron  | SNP | 0.490 | 26 | 25 |
| SMPD3       | chr16 | 68395469 | CTT | -  | -- | -- | Intron  | DEL | 0.246 | 43 | 14 |
| --          | chr16 | 68745959 | G   | T  | -- | -- | IGR     | SNP | 0.222 | 14 | 4  |
| TMCO7       | chr16 | 69072755 | G   | A  | -- | -- | Intron  | SNP | 0.278 | 39 | 15 |
| SNTB2       | chr16 | 69306442 | C   | A  | -- | -- | Intron  | SNP | 0.182 | 18 | 4  |
| CYB5B       | chr16 | 69457994 | G   | A  | -- | -- | 5'Flank | SNP | 0.129 | 27 | 4  |
| PDPR        | chr16 | 70175738 | C   | G  | -- | -- | Intron  | SNP | 0.155 | 98 | 18 |
| --          | chr16 | 70232963 | A   | T  | -- | -- | IGR     | SNP | 0.111 | 40 | 5  |
| AARS        | chr16 | 70294625 | G   | A  | -- | -- | Intron  | SNP | 0.278 | 26 | 10 |
| DDX19B      | chr16 | 70340624 | G   | C  | -- | -- | Intron  | SNP | 0.333 | 36 | 18 |
| LOC1005060E | chr16 | 70360093 | C   | G  | -- | -- | RNA     | SNP | 0.477 | 34 | 31 |
| DDX19A      | chr16 | 70387493 | C   | T  | -- | -- | Intron  | SNP | 0.554 | 25 | 31 |
| ST3GAL2     | chr16 | 70413057 | C   | T  | -- | -- | 3'Flank | SNP | 0.577 | 30 | 41 |
| SF3B3       | chr16 | 70564118 | -   | GA | -- | -- | Intron  | INS | 0.412 | 10 | 7  |
| IL34        | chr16 | 70636528 | T   | G  | -- | -- | Intron  | SNP | 0.125 | 35 | 5  |
| VAC14       | chr16 | 70742161 | C   | T  | -- | -- | Intron  | SNP | 0.279 | 49 | 19 |
| VAC14       | chr16 | 70810491 | C   | T  | -- | -- | Intron  | SNP | 0.476 | 22 | 20 |
| VAC14       | chr16 | 70810584 | C   | T  | -- | -- | Intron  | SNP | 0.480 | 26 | 24 |
| HYDIN       | chr16 | 70911512 | T   | A  | -- | -- | Intron  | SNP | 0.126 | 97 | 14 |
| --          | chr16 | 71278505 | C   | T  | -- | -- | IGR     | SNP | 0.385 | 32 | 20 |

|                  |       |          |     |     |        |        |                 |     |       |    |    |
|------------------|-------|----------|-----|-----|--------|--------|-----------------|-----|-------|----|----|
| --               | chr16 | 71278547 | G   | C   | --     | --     | IGR             | SNP | 0.407 | 32 | 22 |
| --               | chr16 | 71313712 | A   | C   | --     | --     | IGR             | SNP | 0.231 | 30 | 9  |
| --               | chr16 | 71389257 | T   | C   | --     | --     | IGR             | SNP | 0.180 | 41 | 9  |
| --               | chr16 | 71626477 | C   | G   | --     | --     | IGR             | SNP | 0.460 | 27 | 23 |
| --               | chr16 | 71626923 | G   | C   | --     | --     | IGR             | SNP | 0.347 | 32 | 17 |
| <i>PHLPP2</i>    | chr16 | 71683763 | C   | T   | G3002A | R1001H | Missense_mutati | SNP | 0.435 | 39 | 30 |
| <i>AP1G1</i>     | chr16 | 71822570 | TTA | -   | --     | --     | Intron          | DEL | 0.308 | 36 | 16 |
| --               | chr16 | 71853255 | C   | G   | --     | --     | IGR             | SNP | 0.200 | 24 | 6  |
| <i>DHODH</i>     | chr16 | 72054896 | G   | A   | --     | --     | Intron          | SNP | 0.533 | 28 | 32 |
| --               | chr16 | 72512872 | G   | T   | --     | --     | IGR             | SNP | 0.133 | 26 | 4  |
| --               | chr16 | 72679463 | A   | C   | --     | --     | IGR             | SNP | 0.132 | 33 | 5  |
| <i>ZFXH3</i>     | chr16 | 73093299 | A   | G   | --     | --     | 5'Flank         | SNP | 0.174 | 19 | 4  |
| --               | chr16 | 73597206 | G   | A   | --     | --     | IGR             | SNP | 0.205 | 35 | 9  |
| --               | chr16 | 73924735 | T   | A   | --     | --     | IGR             | SNP | 0.191 | 38 | 9  |
| --               | chr16 | 73925669 | C   | T   | --     | --     | IGR             | SNP | 0.148 | 23 | 4  |
| --               | chr16 | 73964641 | T   | C   | --     | --     | IGR             | SNP | 0.235 | 39 | 12 |
| --               | chr16 | 74247441 | G   | C   | --     | --     | IGR             | SNP | 0.526 | 18 | 20 |
| --               | chr16 | 74276432 | T   | A   | --     | --     | IGR             | SNP | 0.119 | 37 | 5  |
| --               | chr16 | 74312980 | C   | T   | --     | --     | IGR             | SNP | 0.250 | 30 | 10 |
| <i>CLEC18B</i>   | chr16 | 74445987 | G   | C   | --     | --     | Intron          | SNP | 0.167 | 55 | 11 |
| <i>GLG1</i>      | chr16 | 74567803 | A   | T   | --     | --     | Intron          | SNP | 0.270 | 27 | 10 |
| --               | chr16 | 75159966 | G   | A   | --     | --     | IGR             | SNP | 0.143 | 24 | 4  |
| --               | chr16 | 75218362 | C   | T   | --     | --     | IGR             | SNP | 0.148 | 23 | 4  |
| <i>GABARAPL2</i> | chr16 | 75600784 | G   | T   | G69T   | A23A   | Silent          | SNP | 0.177 | 51 | 11 |
| --               | chr16 | 75852798 | GA  | -   | --     | --     | IGR             | DEL | 0.286 | 25 | 10 |
| --               | chr16 | 76187819 | G   | C   | --     | --     | IGR             | SNP | 0.282 | 28 | 11 |
| --               | chr16 | 76212044 | G   | T   | --     | --     | IGR             | SNP | 0.537 | 19 | 22 |
| <i>CNTNAP4</i>   | chr16 | 76357196 | C   | T   | --     | --     | Intron          | SNP | 0.100 | 36 | 4  |
| <i>CNTNAP4</i>   | chr16 | 76476581 | A   | T   | --     | --     | Intron          | SNP | 0.289 | 32 | 13 |
| --               | chr16 | 76623704 | T   | C   | --     | --     | IGR             | SNP | 0.449 | 27 | 22 |
| <i>ADAMTS18</i>  | chr16 | 77371523 | C   | G   | --     | --     | Intron          | SNP | 0.186 | 48 | 11 |
| <i>ADAMTS18</i>  | chr16 | 77469283 | C   | G   | --     | --     | 5'Flank         | SNP | 0.500 | 24 | 24 |
| --               | chr16 | 77505886 | G   | A   | --     | --     | IGR             | SNP | 0.455 | 30 | 25 |
| --               | chr16 | 77549894 | G   | T   | --     | --     | IGR             | SNP | 0.255 | 41 | 14 |
| --               | chr16 | 77778165 | G   | C   | --     | --     | IGR             | SNP | 0.456 | 37 | 31 |
| --               | chr16 | 77802046 | T   | C   | --     | --     | IGR             | SNP | 0.551 | 22 | 27 |
| <i>VAT1L</i>     | chr16 | 77914688 | T   | A   | --     | --     | Intron          | SNP | 0.244 | 34 | 11 |
| --               | chr16 | 78087082 | A   | G   | --     | --     | IGR             | SNP | 0.216 | 40 | 11 |
| <i>WWOX</i>      | chr16 | 78270357 | T   | A   | --     | --     | Intron          | SNP | 0.183 | 49 | 11 |
| <i>WWOX</i>      | chr16 | 78352187 | G   | T   | --     | --     | Intron          | SNP | 0.222 | 14 | 4  |
| <i>WWOX</i>      | chr16 | 78483843 | C   | T   | --     | --     | Intron          | SNP | 0.444 | 20 | 16 |
| <i>WWOX</i>      | chr16 | 78572169 | C   | T   | --     | --     | Intron          | SNP | 0.333 | 20 | 10 |
| <i>WWOX</i>      | chr16 | 79079671 | C   | T   | --     | --     | Intron          | SNP | 0.190 | 17 | 4  |
| --               | chr16 | 79264068 | A   | T   | --     | --     | IGR             | SNP | 0.161 | 47 | 9  |
| --               | chr16 | 79558710 | C   | A   | --     | --     | IGR             | SNP | 0.452 | 34 | 28 |
| --               | chr16 | 79574544 | C   | A   | --     | --     | IGR             | SNP | 0.136 | 51 | 8  |
| --               | chr16 | 79705480 | G   | T   | --     | --     | IGR             | SNP | 0.325 | 27 | 13 |
| --               | chr16 | 79812311 | -   | TTG | --     | --     | IGR             | INS | 0.318 | 30 | 14 |
| --               | chr16 | 79874676 | G   | A   | --     | --     | IGR             | SNP | 0.444 | 30 | 24 |
| --               | chr16 | 79993774 | C   | A   | --     | --     | IGR             | SNP | 0.444 | 25 | 20 |
| --               | chr16 | 80402663 | G   | C   | --     | --     | IGR             | SNP | 0.222 | 28 | 8  |
| --               | chr16 | 80514345 | -   | CT  | --     | --     | IGR             | INS | 0.193 | 46 | 11 |
| --               | chr16 | 81008409 | C   | T   | --     | --     | IGR             | SNP | 0.133 | 72 | 11 |
| --               | chr16 | 81082749 | A   | T   | --     | --     | IGR             | SNP | 0.171 | 29 | 6  |
| <i>C16orf46</i>  | chr16 | 81099100 | G   | A   | --     | --     | Intron          | SNP | 0.190 | 17 | 4  |
| <i>PKD1L2</i>    | chr16 | 81216580 | G   | T   | --     | --     | Intron          | SNP | 0.148 | 23 | 4  |
| <i>HSD17B2</i>   | chr16 | 82105827 | G   | C   | --     | --     | Intron          | SNP | 0.568 | 19 | 25 |
| --               | chr16 | 82214085 | C   | A   | --     | --     | IGR             | SNP | 0.190 | 34 | 8  |
| <i>CDH13</i>     | chr16 | 82984124 | T   | G   | --     | --     | Intron          | SNP | 0.180 | 41 | 9  |
| <i>CDH13</i>     | chr16 | 82984125 | G   | T   | --     | --     | Intron          | SNP | 0.176 | 42 | 9  |
| <i>CDH13</i>     | chr16 | 83084128 | C   | T   | --     | --     | Intron          | SNP | 0.289 | 32 | 13 |
| <i>CDH13</i>     | chr16 | 83257588 | C   | G   | --     | --     | Intron          | SNP | 0.344 | 40 | 21 |
| <i>CDH13</i>     | chr16 | 83551159 | C   | T   | --     | --     | Intron          | SNP | 0.185 | 53 | 12 |
| <i>CDH13</i>     | chr16 | 83559647 | AT  | -   | --     | --     | Intron          | DEL | 0.465 | 23 | 20 |
| --               | chr16 | 84223289 | G   | A   | --     | --     | IGR             | SNP | 0.321 | 36 | 17 |
| <i>KIAA0513</i>  | chr16 | 85078851 | G   | C   | --     | --     | Intron          | SNP | 0.438 | 36 | 28 |
| --               | chr16 | 85261750 | C   | A   | --     | --     | IGR             | SNP | 0.146 | 41 | 7  |
| --               | chr16 | 85273641 | A   | T   | --     | --     | IGR             | SNP | 0.203 | 63 | 16 |
| --               | chr16 | 85445152 | T   | C   | --     | --     | IGR             | SNP | 0.333 | 10 | 5  |
| <i>GINS2</i>     | chr16 | 85722526 | G   | T   | --     | --     | 5'UTR           | SNP | 0.116 | 38 | 5  |
| --               | chr16 | 85789843 | G   | T   | --     | --     | IGR             | SNP | 0.138 | 56 | 9  |
| --               | chr16 | 86006369 | T   | C   | --     | --     | IGR             | SNP | 0.339 | 39 | 20 |
| --               | chr16 | 86115486 | T   | C   | --     | --     | IGR             | SNP | 0.400 | 9  | 6  |
| --               | chr16 | 86674325 | G   | C   | --     | --     | IGR             | SNP | 0.200 | 48 | 12 |
| --               | chr16 | 86777792 | T   | G   | --     | --     | IGR             | SNP | 0.136 | 38 | 6  |
| --               | chr16 | 86826601 | G   | A   | --     | --     | IGR             | SNP | 0.231 | 40 | 12 |
| --               | chr16 | 87001453 | C   | G   | --     | --     | IGR             | SNP | 0.448 | 16 | 13 |
| --               | chr16 | 87117136 | C   | T   | --     | --     | IGR             | SNP | 0.222 | 14 | 4  |
| <i>ZCCHC14</i>   | chr16 | 87477367 | G   | A   | --     | --     | Intron          | SNP | 0.526 | 18 | 20 |
| --               | chr16 | 87820449 | C   | T   | --     | --     | IGR             | SNP | 0.459 | 33 | 28 |

|             |       |          |     |       |    |    |         |     |       |    |    |
|-------------|-------|----------|-----|-------|----|----|---------|-----|-------|----|----|
| --          | chr16 | 87838076 | C   | T     | -- | -- | IGR     | SNP | 0.414 | 34 | 24 |
| --          | chr16 | 87838646 | C   | G     | -- | -- | IGR     | SNP | 0.522 | 44 | 48 |
| --          | chr16 | 87974239 | C   | G     | -- | -- | IGR     | SNP | 0.588 | 21 | 30 |
| BANP        | chr16 | 88009530 | G   | T     | -- | -- | Intron  | SNP | 0.139 | 68 | 11 |
| --          | chr16 | 88112684 | C   | G     | -- | -- | IGR     | SNP | 0.512 | 20 | 21 |
| --          | chr16 | 88208075 | -   | TCTGC | -- | -- | IGR     | INS | 0.167 | 40 | 8  |
| --          | chr16 | 88256376 | C   | A     | -- | -- | IGR     | SNP | 0.108 | 33 | 4  |
| ZFPM1       | chr16 | 88520334 | T   | G     | -- | -- | Intron  | SNP | 0.267 | 11 | 4  |
| ZFPM1       | chr16 | 88575149 | C   | T     | -- | -- | Intron  | SNP | 0.197 | 49 | 12 |
| CBFA2T3     | chr16 | 89021340 | T   | G     | -- | -- | Intron  | SNP | 0.294 | 12 | 5  |
| CBFA2T3     | chr16 | 89021738 | G   | A     | -- | -- | Intron  | SNP | 0.148 | 23 | 4  |
| --          | chr16 | 89078096 | C   | A     | -- | -- | IGR     | SNP | 0.128 | 41 | 6  |
| --          | chr16 | 89078133 | G   | A     | -- | -- | IGR     | SNP | 0.195 | 33 | 8  |
| --          | chr16 | 89079094 | C   | A     | -- | -- | IGR     | SNP | 0.516 | 15 | 16 |
| --          | chr16 | 89137990 | C   | G     | -- | -- | IGR     | SNP | 0.413 | 37 | 26 |
| CDH15       | chr16 | 89254906 | G   | A     | -- | -- | Intron  | SNP | 0.103 | 35 | 4  |
| CDH15       | chr16 | 89254979 | C   | G     | -- | -- | Intron  | SNP | 0.152 | 28 | 5  |
| --          | chr16 | 89322252 | G   | T     | -- | -- | IGR     | SNP | 0.234 | 36 | 11 |
| ANKRD11     | chr16 | 89506022 | G   | T     | -- | -- | Intron  | SNP | 0.111 | 80 | 10 |
| ANKRD11     | chr16 | 89530754 | C   | T     | -- | -- | Intron  | SNP | 0.500 | 15 | 15 |
| CPNE7       | chr16 | 89646900 | C   | T     | -- | -- | Intron  | SNP | 0.179 | 78 | 17 |
| CHMP1A      | chr16 | 89714172 | G   | A     | -- | -- | Intron  | SNP | 0.139 | 31 | 5  |
| CHMP1A      | chr16 | 89714256 | G   | A     | -- | -- | Intron  | SNP | 0.316 | 13 | 6  |
| DBNDD1      | chr16 | 90070846 | G   | A     | -- | -- | 3'Flank | SNP | 0.189 | 43 | 10 |
| DBNDD1      | chr16 | 90074467 | C   | T     | -- | -- | Intron  | SNP | 0.130 | 67 | 10 |
| --          | chr16 | 90236435 | C   | G     | -- | -- | IGR     | SNP | 0.250 | 9  | 3  |
| --          | chr16 | 90250243 | CAT | -     | -- | -- | IGR     | DEL | 0.158 | 16 | 3  |
| RPH3AL      | chr17 | 71572    | A   | G     | -- | -- | Intron  | SNP | 0.500 | 5  | 5  |
| RPH3AL      | chr17 | 71573    | C   | G     | -- | -- | Intron  | SNP | 0.444 | 5  | 4  |
| RPH3AL      | chr17 | 78029    | C   | T     | -- | -- | Intron  | SNP | 0.808 | 5  | 21 |
| RPH3AL      | chr17 | 105785   | T   | C     | -- | -- | Intron  | SNP | 0.800 | 1  | 4  |
| --          | chr17 | 227314   | AAG | -     | -- | -- | IGR     | DEL | 0.118 | 15 | 2  |
| --          | chr17 | 275233   | C   | A     | -- | -- | IGR     | SNP | 0.900 | 1  | 9  |
| --          | chr17 | 408945   | T   | G     | -- | -- | IGR     | SNP | 0.190 | 17 | 4  |
| --          | chr17 | 409677   | G   | C     | -- | -- | IGR     | SNP | 0.400 | 6  | 4  |
| VPS53       | chr17 | 516799   | T   | C     | -- | -- | Intron  | SNP | 0.200 | 12 | 3  |
| VPS53       | chr17 | 552383   | T   | G     | -- | -- | Intron  | SNP | 0.139 | 31 | 5  |
| NXN         | chr17 | 845224   | C   | A     | -- | -- | Intron  | SNP | 0.250 | 12 | 4  |
| ABR         | chr17 | 1022682  | C   | G     | -- | -- | Intron  | SNP | 0.132 | 46 | 7  |
| ABR         | chr17 | 1060563  | G   | T     | -- | -- | Intron  | SNP | 0.200 | 16 | 4  |
| ABR         | chr17 | 1067354  | A   | C     | -- | -- | Intron  | SNP | 0.125 | 77 | 11 |
| --          | chr17 | 1140788  | A   | T     | -- | -- | IGR     | SNP | 0.148 | 23 | 4  |
| SLC43A2     | chr17 | 1503840  | C   | T     | -- | -- | Intron  | SNP | 0.217 | 18 | 5  |
| --          | chr17 | 1642967  | G   | A     | -- | -- | IGR     | SNP | 0.250 | 9  | 3  |
| --          | chr17 | 1643551  | T   | G     | -- | -- | IGR     | SNP | 0.200 | 28 | 7  |
| --          | chr17 | 1643552  | G   | A     | -- | -- | IGR     | SNP | 0.200 | 28 | 7  |
| --          | chr17 | 1643687  | G   | A     | -- | -- | IGR     | SNP | 0.412 | 10 | 7  |
| --          | chr17 | 1643729  | A   | G     | -- | -- | IGR     | SNP | 0.333 | 12 | 6  |
| --          | chr17 | 1643731  | G   | C     | -- | -- | IGR     | SNP | 0.353 | 11 | 6  |
| --          | chr17 | 1643846  | C   | G     | -- | -- | IGR     | SNP | 0.500 | 4  | 4  |
| --          | chr17 | 1662449  | G   | A     | -- | -- | IGR     | SNP | 0.182 | 27 | 6  |
| --          | chr17 | 1817945  | G   | A     | -- | -- | IGR     | SNP | 0.286 | 15 | 6  |
| SMG6        | chr17 | 2048835  | G   | A     | -- | -- | Intron  | SNP | 0.857 | 2  | 12 |
| SMG6        | chr17 | 2055501  | G   | C     | -- | -- | Intron  | SNP | 0.167 | 20 | 4  |
| SGSM2       | chr17 | 2258184  | -   | TG    | -- | -- | Intron  | INS | 0.143 | 18 | 3  |
| METTL16     | chr17 | 2350828  | G   | A     | -- | -- | Intron  | SNP | 0.188 | 13 | 3  |
| --          | chr17 | 2679914  | G   | A     | -- | -- | IGR     | SNP | 0.889 | 1  | 8  |
| RAP1GAP2    | chr17 | 2934667  | A   | G     | -- | -- | Intron  | SNP | 0.114 | 31 | 4  |
| RAP1GAP2    | chr17 | 2934691  | -   | TG    | -- | -- | Intron  | INS | 0.184 | 40 | 9  |
| ASPA        | chr17 | 3395161  | C   | T     | -- | -- | Intron  | SNP | 0.222 | 14 | 4  |
| --          | chr17 | 3901834  | C   | A     | -- | -- | IGR     | SNP | 0.667 | 7  | 14 |
| --          | chr17 | 4393428  | T   | G     | -- | -- | IGR     | SNP | 0.182 | 18 | 4  |
| SMTNL2      | chr17 | 4507174  | C   | G     | -- | -- | Intron  | SNP | 0.919 | 3  | 34 |
| PELP1       | chr17 | 4577595  | C   | G     | -- | -- | Intron  | SNP | 0.909 | 4  | 40 |
| LOC10013095 | chr17 | 5138211  | G   | C     | -- | -- | RNA     | SNP | 0.391 | 28 | 18 |
| LOC10013095 | chr17 | 5139337  | C   | T     | -- | -- | 3'Flank | SNP | 0.300 | 7  | 3  |
| --          | chr17 | 5143427  | CA  | -     | -- | -- | IGR     | DEL | 0.103 | 35 | 4  |
| --          | chr17 | 5168679  | C   | G     | -- | -- | IGR     | SNP | 0.864 | 3  | 19 |
| --          | chr17 | 5594896  | G   | C     | -- | -- | IGR     | SNP | 0.320 | 17 | 8  |
| LOC339166   | chr17 | 5724430  | -   | GT    | -- | -- | RNA     | INS | 0.214 | 21 | 6  |
| --          | chr17 | 5878494  | CCT | -     | -- | -- | IGR     | DEL | 0.103 | 26 | 3  |
| WSCD1       | chr17 | 5985490  | A   | T     | -- | -- | Intron  | SNP | 0.371 | 22 | 13 |
| WSCD1       | chr17 | 6004544  | A   | G     | -- | -- | Intron  | SNP | 0.774 | 7  | 24 |
| --          | chr17 | 6126049  | G   | A     | -- | -- | IGR     | SNP | 0.556 | 12 | 15 |
| --          | chr17 | 6131009  | AT  | -     | -- | -- | IGR     | DEL | 0.150 | 17 | 3  |
| KIAA0753    | chr17 | 6518933  | T   | A     | -- | -- | Intron  | SNP | 0.294 | 12 | 5  |
| --          | chr17 | 6698237  | C   | G     | -- | -- | IGR     | SNP | 0.941 | 2  | 32 |
| TEKT1       | chr17 | 6710790  | C   | T     | -- | -- | Intron  | SNP | 0.800 | 2  | 8  |
| TEKT1       | chr17 | 6732132  | T   | A     | -- | -- | Intron  | SNP | 0.379 | 18 | 11 |
| LOC10050671 | chr17 | 6899195  | A   | G     | -- | -- | RNA     | SNP | 0.889 | 3  | 24 |

|             |       |          |       |    |            |            |                 |     |       |    |    |
|-------------|-------|----------|-------|----|------------|------------|-----------------|-----|-------|----|----|
| --          | chr17 | 6970102  | C     | G  | --         | --         | IGR             | SNP | 0.880 | 3  | 22 |
| --          | chr17 | 7048123  | A     | C  | --         | --         | IGR             | SNP | 0.667 | 2  | 4  |
| TP53        | chr17 | 7572148  | G     | A  | --         | --         | 3'UTR           | SNP | 0.211 | 15 | 4  |
| TP53        | chr17 | 7578449  | C     | T  | G85A,G481A | A29T,A161T | Missense_mutati | SNP | 0.829 | 6  | 29 |
| CHD3        | chr17 | 7811549  | C     | T  | --         | --         | Intron          | SNP | 0.889 | 4  | 32 |
| MIR3676,MIR | chr17 | 8089661  | G     | A  | --         | --         | 5'Flank         | SNP | 0.767 | 7  | 23 |
| MIR3676,MIR | chr17 | 8090249  | G     | C  | --         | --         | 5'Flank         | SNP | 0.886 | 4  | 31 |
| --          | chr17 | 8232923  | C     | T  | --         | --         | IGR             | SNP | 0.333 | 10 | 5  |
| MYH10       | chr17 | 8440951  | C     | T  | --         | --         | Intron          | SNP | 0.854 | 6  | 35 |
| --          | chr17 | 8613000  | T     | A  | --         | --         | IGR             | SNP | 0.300 | 7  | 3  |
| PIK3R6      | chr17 | 8710729  | C     | T  | --         | --         | Intron          | SNP | 0.820 | 11 | 50 |
| PIK3R6      | chr17 | 8736341  | C     | G  | G667C      | E223Q      | Missense_mutati | SNP | 0.800 | 9  | 36 |
| NTN1        | chr17 | 9057473  | G     | A  | --         | --         | Intron          | SNP | 0.386 | 27 | 17 |
| STX8        | chr17 | 9217892  | TA    | -  | --         | --         | Intron          | DEL | 0.167 | 14 | 3  |
| USP43       | chr17 | 9594439  | TC    | -  | --         | --         | Intron          | DEL | 0.176 | 14 | 3  |
| --          | chr17 | 9810859  | TG    | -  | --         | --         | IGR             | DEL | 0.143 | 18 | 3  |
| GAS7        | chr17 | 9838972  | C     | G  | --         | --         | Intron          | SNP | 0.150 | 34 | 6  |
| GAS7        | chr17 | 9839962  | A     | T  | --         | --         | Intron          | SNP | 0.125 | 21 | 3  |
| GAS7        | chr17 | 9840089  | C     | A  | --         | --         | Intron          | SNP | 0.500 | 15 | 15 |
| GAS7        | chr17 | 9953713  | C     | G  | --         | --         | Intron          | SNP | 0.837 | 8  | 41 |
| GAS7        | chr17 | 10056355 | C     | A  | --         | --         | Intron          | SNP | 0.400 | 9  | 6  |
| --          | chr17 | 10174800 | C     | T  | --         | --         | IGR             | SNP | 0.355 | 20 | 11 |
| MYH13       | chr17 | 10210959 | C     | T  | --         | --         | Intron          | SNP | 0.750 | 5  | 15 |
| TMEM220     | chr17 | 10631644 | G     | T  | --         | --         | Intron          | SNP | 0.455 | 6  | 5  |
| SHISA6      | chr17 | 11356282 | TCTC  | -  | --         | --         | Intron          | DEL | 0.348 | 15 | 8  |
| --          | chr17 | 11468768 | C     | A  | --         | --         | IGR             | SNP | 0.364 | 14 | 8  |
| DNAH9       | chr17 | 11618095 | G     | A  | --         | --         | Intron          | SNP | 0.833 | 4  | 20 |
| --          | chr17 | 12202422 | G     | T  | --         | --         | IGR             | SNP | 0.415 | 24 | 17 |
| --          | chr17 | 12347570 | T     | A  | --         | --         | IGR             | SNP | 0.533 | 7  | 8  |
| ARHGAP44    | chr17 | 12755158 | C     | A  | --         | --         | Intron          | SNP | 0.533 | 14 | 16 |
| --          | chr17 | 13326841 | GCA   | -  | --         | --         | IGR             | DEL | 0.143 | 24 | 4  |
| --          | chr17 | 13570059 | T     | G  | --         | --         | IGR             | SNP | 0.267 | 11 | 4  |
| --          | chr17 | 13951794 | C     | T  | --         | --         | IGR             | SNP | 0.500 | 3  | 3  |
| --          | chr17 | 14159912 | A     | G  | --         | --         | IGR             | SNP | 0.133 | 39 | 6  |
| HS3ST3B1    | chr17 | 14235423 | C     | G  | --         | --         | Intron          | SNP | 0.867 | 4  | 26 |
| --          | chr17 | 14283435 | C     | T  | --         | --         | IGR             | SNP | 0.875 | 4  | 28 |
| --          | chr17 | 14382920 | A     | G  | --         | --         | IGR             | SNP | 0.488 | 22 | 21 |
| --          | chr17 | 14985049 | C     | G  | --         | --         | IGR             | SNP | 0.371 | 22 | 13 |
| --          | chr17 | 14999499 | AGT   | -  | --         | --         | IGR             | DEL | 0.143 | 12 | 2  |
| --          | chr17 | 15735278 | C     | T  | --         | --         | IGR             | SNP | 0.267 | 44 | 16 |
| --          | chr17 | 16582562 | C     | T  | --         | --         | IGR             | SNP | 0.121 | 29 | 4  |
| --          | chr17 | 16798249 | G     | A  | --         | --         | IGR             | SNP | 0.500 | 9  | 9  |
| MPRIP       | chr17 | 16973494 | T     | G  | --         | --         | Intron          | SNP | 0.360 | 16 | 9  |
| MPRIP       | chr17 | 17004981 | C     | G  | --         | --         | Intron          | SNP | 0.225 | 31 | 9  |
| RASD1       | chr17 | 17397747 | C     | A  | --         | --         | 3'Flank         | SNP | 0.308 | 9  | 4  |
| LRRC48      | chr17 | 17880175 | G     | A  | --         | --         | Intron          | SNP | 0.114 | 39 | 5  |
| DRG2        | chr17 | 17996908 | A     | T  | --         | --         | Intron          | SNP | 0.306 | 25 | 11 |
| SHMT1       | chr17 | 18242008 | T     | C  | --         | --         | Intron          | SNP | 0.238 | 16 | 5  |
| SHMT1       | chr17 | 18242272 | T     | A  | --         | --         | Intron          | SNP | 0.211 | 15 | 4  |
| --          | chr17 | 18304744 | G     | C  | --         | --         | IGR             | SNP | 0.560 | 11 | 14 |
| --          | chr17 | 18401046 | G     | T  | --         | --         | IGR             | SNP | 0.135 | 45 | 7  |
| CCDC144B    | chr17 | 18473330 | G     | A  | --         | --         | RNA             | SNP | 0.500 | 3  | 3  |
| CCDC144B    | chr17 | 18492321 | T     | C  | --         | --         | RNA             | SNP | 0.235 | 13 | 4  |
| CCDC144B    | chr17 | 18492325 | C     | T  | --         | --         | RNA             | SNP | 0.333 | 10 | 5  |
| CCDC144B    | chr17 | 18506259 | G     | C  | --         | --         | RNA             | SNP | 0.500 | 4  | 4  |
| --          | chr17 | 18616474 | CT    | -  | --         | --         | IGR             | DEL | 0.176 | 14 | 3  |
| --          | chr17 | 18967349 | -     | GA | --         | --         | IGR             | INS | 0.375 | 10 | 6  |
| --          | chr17 | 19339545 | C     | G  | --         | --         | IGR             | SNP | 0.886 | 4  | 31 |
| --          | chr17 | 19371823 | C     | G  | --         | --         | IGR             | SNP | 1.000 | 0  | 26 |
| SPECC1      | chr17 | 19951772 | C     | T  | --         | --         | Intron          | SNP | 0.419 | 18 | 13 |
| --          | chr17 | 20595063 | CTA   | -  | --         | --         | IGR             | DEL | 0.111 | 24 | 3  |
| --          | chr17 | 20706228 | G     | T  | --         | --         | IGR             | SNP | 0.129 | 27 | 4  |
| --          | chr17 | 20706229 | G     | A  | --         | --         | IGR             | SNP | 0.138 | 25 | 4  |
| --          | chr17 | 20723134 | G     | A  | --         | --         | IGR             | SNP | 0.121 | 29 | 4  |
| --          | chr17 | 20821484 | G     | A  | --         | --         | IGR             | SNP | 0.429 | 4  | 3  |
| --          | chr17 | 20875413 | G     | A  | --         | --         | IGR             | SNP | 0.889 | 1  | 8  |
| --          | chr17 | 20884985 | G     | T  | --         | --         | IGR             | SNP | 0.488 | 22 | 21 |
| DHRS7B      | chr17 | 21083091 | TC    | -  | --         | --         | Intron          | DEL | 0.105 | 17 | 2  |
| --          | chr17 | 21346876 | C     | A  | --         | --         | IGR             | SNP | 0.109 | 57 | 7  |
| --          | chr17 | 21388112 | A     | G  | --         | --         | IGR             | SNP | 0.138 | 25 | 4  |
| --          | chr17 | 21736650 | G     | T  | --         | --         | IGR             | SNP | 0.571 | 3  | 4  |
| --          | chr17 | 21842321 | A     | G  | --         | --         | IGR             | SNP | 0.455 | 18 | 15 |
| --          | chr17 | 21866435 | GAAGA | -  | --         | --         | IGR             | DEL | 0.148 | 23 | 4  |
| --          | chr17 | 21885882 | C     | G  | --         | --         | IGR             | SNP | 0.283 | 33 | 13 |
| --          | chr17 | 21897596 | C     | A  | --         | --         | IGR             | SNP | 0.594 | 13 | 19 |
| --          | chr17 | 21955868 | C     | G  | --         | --         | IGR             | SNP | 0.472 | 19 | 17 |
| --          | chr17 | 22052870 | A     | G  | --         | --         | IGR             | SNP | 0.182 | 18 | 4  |
| --          | chr17 | 22052893 | C     | T  | --         | --         | IGR             | SNP | 0.235 | 13 | 4  |
| --          | chr17 | 22053051 | T     | A  | --         | --         | IGR             | SNP | 0.333 | 8  | 4  |
| --          | chr17 | 22066331 | A     | G  | --         | --         | IGR             | SNP | 0.467 | 16 | 14 |

|             |       |          |       |       |        |       |         |     |       |    |    |
|-------------|-------|----------|-------|-------|--------|-------|---------|-----|-------|----|----|
| --          | chr17 | 22068600 | G     | A     | --     | --    | IGR     | SNP | 0.526 | 27 | 30 |
| --          | chr17 | 22135214 | C     | T     | --     | --    | IGR     | SNP | 0.316 | 13 | 6  |
| --          | chr17 | 22164590 | C     | G     | --     | --    | IGR     | SNP | 0.136 | 19 | 3  |
| --          | chr17 | 22169883 | A     | T     | --     | --    | IGR     | SNP | 0.593 | 22 | 32 |
| --          | chr17 | 22245952 | G     | A     | --     | --    | IGR     | SNP | 0.120 | 44 | 6  |
| --          | chr17 | 25269495 | G     | C     | --     | --    | IGR     | SNP | 0.200 | 12 | 3  |
| --          | chr17 | 25275564 | G     | C     | --     | --    | IGR     | SNP | 0.143 | 24 | 4  |
| --          | chr17 | 25287052 | C     | T     | --     | --    | IGR     | SNP | 0.111 | 24 | 3  |
| --          | chr17 | 25292093 | A     | G     | --     | --    | IGR     | SNP | 0.234 | 36 | 11 |
| --          | chr17 | 25305151 | T     | C     | --     | --    | IGR     | SNP | 0.108 | 58 | 7  |
| --          | chr17 | 25305485 | A     | T     | --     | --    | IGR     | SNP | 0.100 | 27 | 3  |
| --          | chr17 | 25420162 | C     | T     | --     | --    | IGR     | SNP | 0.102 | 44 | 5  |
| --          | chr17 | 25603230 | G     | T     | --     | --    | IGR     | SNP | 0.118 | 30 | 4  |
| KSR1        | chr17 | 25891007 | C     | T     | --     | --    | Intron  | SNP | 0.160 | 21 | 4  |
| KSR1        | chr17 | 25919759 | G     | C     | --     | --    | Intron  | SNP | 0.226 | 65 | 19 |
| --          | chr17 | 26166814 | CA    | -     | --     | --    | IGR     | DEL | 0.143 | 36 | 6  |
| NLK         | chr17 | 26445879 | TATTA | -     | --     | --    | Intron  | DEL | 0.318 | 30 | 14 |
| --          | chr17 | 26749246 | T     | A     | --     | --    | IGR     | SNP | 0.500 | 18 | 18 |
| KIAA0100    | chr17 | 26957509 | G     | T     | --     | --    | Intron  | SNP | 0.143 | 24 | 4  |
| C17orf63    | chr17 | 27142248 | T     | A     | --     | --    | Intron  | SNP | 0.143 | 24 | 4  |
| --          | chr17 | 27522509 | A     | T     | --     | --    | IGR     | SNP | 0.267 | 44 | 16 |
| --          | chr17 | 27662173 | -     | GTATA | --     | --    | IGR     | DEL | 0.111 | 16 | 2  |
| --          | chr17 | 27676180 | G     | A     | --     | --    | IGR     | SNP | 0.130 | 20 | 3  |
| TAOK1       | chr17 | 27791477 | G     | A     | --     | --    | Intron  | SNP | 0.224 | 45 | 13 |
| TAOK1       | chr17 | 27841300 | A     | C     | --     | --    | Intron  | SNP | 0.167 | 50 | 10 |
| SSH2        | chr17 | 27988079 | C     | A     | --     | --    | Intron  | SNP | 0.182 | 18 | 4  |
| SSH2        | chr17 | 28065066 | G     | C     | --     | --    | Intron  | SNP | 0.471 | 9  | 8  |
| SLC6A4      | chr17 | 28536661 | C     | A     | --     | --    | Intron  | SNP | 0.235 | 13 | 4  |
| --          | chr17 | 28640102 | T     | A     | --     | --    | IGR     | SNP | 0.154 | 22 | 4  |
| --          | chr17 | 28694803 | T     | A     | --     | --    | IGR     | SNP | 0.231 | 40 | 12 |
| --          | chr17 | 28876301 | T     | C     | --     | --    | IGR     | SNP | 0.215 | 51 | 14 |
| ADAP2       | chr17 | 29278667 | C     | T     | --     | --    | Intron  | SNP | 0.250 | 15 | 5  |
| --          | chr17 | 29399518 | T     | C     | --     | --    | IGR     | SNP | 0.214 | 44 | 12 |
| --          | chr17 | 29399677 | G     | A     | --     | --    | IGR     | SNP | 0.148 | 23 | 4  |
| NF1         | chr17 | 29425845 | G     | A     | --     | --    | Intron  | SNP | 0.132 | 33 | 5  |
| NF1         | chr17 | 29620230 | G     | A     | --     | --    | Intron  | SNP | 0.200 | 16 | 4  |
| --          | chr17 | 29907892 | C     | T     | --     | --    | IGR     | SNP | 0.189 | 60 | 14 |
| --          | chr17 | 29921998 | C     | T     | --     | --    | IGR     | SNP | 0.280 | 36 | 14 |
| --          | chr17 | 30176088 | T     | A     | --     | --    | IGR     | SNP | 0.614 | 17 | 27 |
| UTP6        | chr17 | 30208306 | G     | T     | --     | --    | Intron  | SNP | 0.200 | 12 | 3  |
| SUZ12       | chr17 | 30276806 | A     | G     | --     | --    | Intron  | SNP | 0.167 | 20 | 4  |
| SUZ12       | chr17 | 30306150 | C     | A     | --     | --    | Intron  | SNP | 0.500 | 6  | 6  |
| SUZ12       | chr17 | 30311969 | A     | T     | --     | --    | Intron  | SNP | 0.118 | 30 | 4  |
| SUZ12       | chr17 | 30328104 | C     | T     | --     | --    | 3'Flank | SNP | 0.159 | 37 | 7  |
| LRRC37B     | chr17 | 30349245 | A     | G     | A1080G | T360T | Silent  | SNP | 0.619 | 16 | 26 |
| RHOT1       | chr17 | 30487844 | G     | A     | --     | --    | Intron  | SNP | 0.290 | 49 | 20 |
| --          | chr17 | 30580741 | C     | G     | --     | --    | IGR     | SNP | 0.255 | 35 | 12 |
| --          | chr17 | 30750608 | C     | G     | --     | --    | IGR     | SNP | 0.517 | 14 | 15 |
| MYO1D       | chr17 | 30973468 | -     | AAT   | --     | --    | Intron  | INS | 0.194 | 25 | 6  |
| MYO1D       | chr17 | 31059150 | C     | T     | --     | --    | Intron  | SNP | 0.288 | 57 | 23 |
| MYO1D       | chr17 | 31183480 | C     | T     | --     | --    | Intron  | SNP | 0.295 | 31 | 13 |
| ACCN1       | chr17 | 31438729 | G     | A     | --     | --    | Intron  | SNP | 0.679 | 18 | 38 |
| ACCN1       | chr17 | 31507806 | C     | T     | --     | --    | Intron  | SNP | 0.304 | 39 | 17 |
| ACCN1       | chr17 | 31534484 | T     | C     | --     | --    | Intron  | SNP | 0.327 | 37 | 18 |
| ACCN1       | chr17 | 31547726 | C     | T     | --     | --    | Intron  | SNP | 0.286 | 25 | 10 |
| ACCN1       | chr17 | 31693647 | A     | G     | --     | --    | Intron  | SNP | 0.641 | 14 | 25 |
| ACCN1       | chr17 | 31751216 | C     | G     | --     | --    | Intron  | SNP | 0.429 | 20 | 15 |
| ACCN1       | chr17 | 31989574 | CG    | -     | --     | --    | Intron  | DEL | 0.211 | 15 | 4  |
| ACCN1       | chr17 | 32203191 | G     | A     | --     | --    | Intron  | SNP | 0.150 | 34 | 6  |
| ACCN1       | chr17 | 32343442 | C     | A     | --     | --    | Intron  | SNP | 0.200 | 12 | 3  |
| --          | chr17 | 32512655 | C     | A     | --     | --    | IGR     | SNP | 0.333 | 8  | 4  |
| --          | chr17 | 32512663 | C     | T     | --     | --    | IGR     | SNP | 0.364 | 7  | 4  |
| --          | chr17 | 32513225 | T     | C     | --     | --    | IGR     | SNP | 0.179 | 23 | 5  |
| --          | chr17 | 33005405 | -     | AC    | --     | --    | IGR     | INS | 0.198 | 85 | 21 |
| --          | chr17 | 33047514 | G     | C     | --     | --    | IGR     | SNP | 0.182 | 81 | 18 |
| --          | chr17 | 33152740 | G     | T     | --     | --    | IGR     | SNP | 0.231 | 70 | 21 |
| --          | chr17 | 33152741 | T     | C     | --     | --    | IGR     | SNP | 0.226 | 72 | 21 |
| CCT6B       | chr17 | 33261121 | C     | A     | --     | --    | Intron  | SNP | 0.103 | 35 | 4  |
| RAD51L3-RFf | chr17 | 33424537 | GTA   | -     | --     | --    | RNA     | DEL | 0.118 | 15 | 2  |
| RASL10B     | chr17 | 34068931 | G     | A     | --     | --    | 3'UTR   | SNP | 0.781 | 7  | 25 |
| --          | chr17 | 34209947 | C     | A     | --     | --    | IGR     | SNP | 1.000 | 0  | 3  |
| --          | chr17 | 34227868 | T     | C     | --     | --    | IGR     | SNP | 0.167 | 30 | 6  |
| --          | chr17 | 34490836 | G     | A     | --     | --    | IGR     | SNP | 0.471 | 9  | 8  |
| TBC1D3B     | chr17 | 34499765 | G     | A     | --     | --    | Intron  | SNP | 0.200 | 28 | 7  |
| --          | chr17 | 35060828 | T     | G     | --     | --    | IGR     | SNP | 0.424 | 19 | 14 |
| --          | chr17 | 35195950 | C     | T     | --     | --    | IGR     | SNP | 0.552 | 13 | 16 |
| AATF        | chr17 | 35342761 | G     | T     | --     | --    | Intron  | SNP | 0.167 | 15 | 3  |
| ACACA       | chr17 | 35616820 | G     | T     | --     | --    | Intron  | SNP | 0.375 | 5  | 3  |
| ACACA       | chr17 | 35766070 | C     | T     | --     | --    | Intron  | SNP | 0.345 | 19 | 10 |
| SYNRG       | chr17 | 35942267 | G     | C     | --     | --    | Intron  | SNP | 0.158 | 16 | 3  |



|             |       |          |        |   |             |             |                 |     |       |    |    |
|-------------|-------|----------|--------|---|-------------|-------------|-----------------|-----|-------|----|----|
| --          | chr17 | 36042712 | G      | T | --          | --          | IGR             | SNP | 0.400 | 6  | 4  |
| --          | chr17 | 36278213 | CAG    | - | --          | --          | IGR             | DEL | 0.158 | 16 | 3  |
| MLLT6       | chr17 | 36872462 | G      | C | --          | --          | Intron          | SNP | 0.422 | 26 | 19 |
| PIP4K2B     | chr17 | 36931194 | TTG    | - | --          | --          | Intron          | DEL | 0.115 | 22 | 3  |
| --          | chr17 | 37016309 | C      | T | --          | --          | IGR             | SNP | 0.895 | 2  | 17 |
| PLXDC1      | chr17 | 37251626 | C      | A | --          | --          | Intron          | SNP | 1.000 | 0  | 3  |
| PLXDC1      | chr17 | 37284196 | C      | A | --          | --          | Intron          | SNP | 0.667 | 2  | 4  |
| FBXL20      | chr17 | 37488814 | A      | T | --          | --          | Intron          | SNP | 0.300 | 7  | 3  |
| FBXL20      | chr17 | 37544727 | G      | T | --          | --          | Intron          | SNP | 0.222 | 14 | 4  |
| CDK12       | chr17 | 37661153 | C      | A | --          | --          | Intron          | SNP | 0.273 | 8  | 3  |
| IKZF3       | chr17 | 37966786 | C      | T | --          | --          | Intron          | SNP | 0.474 | 10 | 9  |
| --          | chr17 | 38362746 | C      | T | --          | --          | IGR             | SNP | 0.962 | 1  | 25 |
| KRTAP4-7    | chr17 | 39240819 | C      | G | C361G       | L121V       | Missense_mutati | SNP | 0.333 | 6  | 3  |
| --          | chr17 | 39242604 | A      | G | --          | --          | IGR             | SNP | 0.500 | 4  | 4  |
| KRTAP4-8    | chr17 | 39254021 | C      | T | G316A       | V106M       | Missense_mutati | SNP | 0.194 | 25 | 6  |
| KRTAP4-8    | chr17 | 39254058 | G      | C | C279G       | S93R        | Missense_mutati | SNP | 0.125 | 35 | 5  |
| KRTAP4-9    | chr17 | 39262031 | G      | A | G391A       | V131M       | Missense_mutati | SNP | 0.147 | 29 | 5  |
| --          | chr17 | 39266154 | T      | C | --          | --          | IGR             | SNP | 0.192 | 21 | 5  |
| KRTAP4-2    | chr17 | 39335336 | T      | A | --          | --          | 5'Flank         | SNP | 0.684 | 6  | 13 |
| --          | chr17 | 39407975 | C      | A | --          | --          | IGR             | SNP | 0.567 | 13 | 17 |
| --          | chr17 | 39764666 | G      | A | --          | --          | IGR             | SNP | 0.300 | 7  | 3  |
| JUP         | chr17 | 39935032 | G      | A | --          | --          | Intron          | SNP | 0.533 | 7  | 8  |
| ACLY        | chr17 | 40045319 | C      | T | --          | --          | Intron          | SNP | 0.343 | 23 | 12 |
| STAT5B      | chr17 | 40357899 | A      | G | --          | --          | Intron          | SNP | 0.463 | 22 | 19 |
| NAGLU       | chr17 | 40692131 | C      | A | --          | --          | Intron          | SNP | 0.600 | 2  | 3  |
| --          | chr17 | 41069171 | G      | T | --          | --          | IGR             | SNP | 0.375 | 5  | 3  |
| RUNDC1      | chr17 | 41135385 | C      | T | --          | --          | Intron          | SNP | 0.167 | 20 | 4  |
| DHX8        | chr17 | 41564405 | G      | A | --          | --          | Intron          | SNP | 0.383 | 29 | 18 |
| --          | chr17 | 41766369 | C      | A | --          | --          | IGR             | SNP | 0.444 | 15 | 12 |
| PYY         | chr17 | 42067488 | T      | G | --          | --          | Intron          | SNP | 0.375 | 10 | 6  |
| --          | chr17 | 42780994 | C      | G | --          | --          | IGR             | SNP | 0.394 | 20 | 13 |
| DBF4B       | chr17 | 42823112 | A      | G | --          | --          | Intron          | SNP | 0.767 | 7  | 23 |
| --          | chr17 | 43049424 | A      | T | --          | --          | IGR             | SNP | 0.355 | 20 | 11 |
| --          | chr17 | 43273725 | T      | C | --          | --          | IGR             | SNP | 0.367 | 19 | 11 |
| MAP3K14     | chr17 | 43392604 | C      | T | --          | --          | Intron          | SNP | 0.750 | 5  | 15 |
| MAP3K14     | chr17 | 43393040 | C      | G | --          | --          | Intron          | SNP | 0.900 | 4  | 36 |
| MAP3K14     | chr17 | 43393280 | C      | T | --          | --          | Intron          | SNP | 0.788 | 7  | 26 |
| MAP3K14     | chr17 | 43393289 | C      | T | --          | --          | Intron          | SNP | 0.750 | 8  | 24 |
| MAP3K14     | chr17 | 43393363 | C      | G | --          | --          | Intron          | SNP | 0.828 | 5  | 24 |
| MAP3K14     | chr17 | 43393375 | C      | G | --          | --          | Intron          | SNP | 0.853 | 5  | 29 |
| PLEKHM1     | chr17 | 43522272 | TC     | - | --          | --          | Intron          | DEL | 0.250 | 27 | 9  |
| --          | chr17 | 43764276 | C      | A | --          | --          | IGR             | SNP | 0.357 | 9  | 5  |
| --          | chr17 | 43788267 | T      | A | --          | --          | IGR             | SNP | 0.479 | 25 | 23 |
| --          | chr17 | 44366577 | C      | T | --          | --          | IGR             | SNP | 0.138 | 25 | 4  |
| ARL17A,LRR( | chr17 | 44597373 | AGT    | - | --          | --          | Intron          | DEL | 0.105 | 17 | 2  |
| ARL17A,LRR( | chr17 | 44622651 | C      | A | --          | --          | Intron          | SNP | 0.625 | 3  | 5  |
| --          | chr17 | 45156324 | C      | G | --          | --          | IGR             | SNP | 0.222 | 14 | 4  |
| --          | chr17 | 45165852 | T      | A | --          | --          | IGR             | SNP | 0.250 | 21 | 7  |
| --          | chr17 | 45193692 | T      | A | --          | --          | IGR             | SNP | 0.429 | 4  | 3  |
| CDC27       | chr17 | 45219247 | G      | A | C1523T,C154 | A508V,A514V | Missense_mutati | SNP | 0.179 | 23 | 5  |
| ITGB3       | chr17 | 45367448 | C      | T | --          | --          | Intron          | SNP | 0.864 | 3  | 19 |
| ITGB3       | chr17 | 45390708 | C      | T | --          | --          | 3'Flank         | SNP | 0.188 | 13 | 3  |
| MRPL45P2    | chr17 | 45528677 | CAT    | - | --          | --          | RNA             | DEL | 0.185 | 22 | 5  |
| --          | chr17 | 45872262 | G      | T | --          | --          | IGR             | SNP | 0.841 | 7  | 37 |
| CBX1        | chr17 | 46161592 | G      | T | --          | --          | Intron          | SNP | 0.375 | 5  | 3  |
| --          | chr17 | 47061696 | A      | T | --          | --          | IGR             | SNP | 0.486 | 18 | 17 |
| --          | chr17 | 47320183 | C      | G | --          | --          | IGR             | SNP | 1.000 | 0  | 12 |
| --          | chr17 | 47508639 | T      | G | --          | --          | IGR             | SNP | 0.381 | 13 | 8  |
| --          | chr17 | 47554375 | G      | A | --          | --          | IGR             | SNP | 0.148 | 23 | 4  |
| --          | chr17 | 47760622 | G      | T | --          | --          | IGR             | SNP | 0.211 | 15 | 4  |
| COL1A1      | chr17 | 48265060 | C      | T | --          | --          | Intron          | SNP | 0.179 | 32 | 7  |
| MRPL27      | chr17 | 48449616 | T      | G | --          | --          | Intron          | SNP | 0.143 | 18 | 3  |
| LRRC59      | chr17 | 48471660 | T      | A | --          | --          | Intron          | SNP | 0.310 | 49 | 22 |
| MYCBPAP     | chr17 | 48584853 | T      | A | --          | --          | 5'Flank         | SNP | 0.250 | 24 | 8  |
| --          | chr17 | 48872527 | AAAAAT | - | --          | --          | IGR             | DEL | 0.429 | 8  | 6  |
| --          | chr17 | 49378114 | C      | G | --          | --          | IGR             | SNP | 0.310 | 29 | 13 |
| --          | chr17 | 49396128 | G      | C | --          | --          | IGR             | SNP | 0.218 | 43 | 12 |
| --          | chr17 | 49435099 | A      | C | --          | --          | IGR             | SNP | 0.208 | 38 | 10 |
| --          | chr17 | 49501872 | A      | T | --          | --          | IGR             | SNP | 0.118 | 30 | 4  |
| --          | chr17 | 49544244 | C      | G | --          | --          | IGR             | SNP | 0.468 | 25 | 22 |
| --          | chr17 | 49667574 | G      | A | --          | --          | IGR             | SNP | 0.177 | 65 | 14 |
| --          | chr17 | 49691252 | C      | T | --          | --          | IGR             | SNP | 0.333 | 38 | 19 |
| CA10        | chr17 | 49889174 | GT     | - | --          | --          | Intron          | DEL | 0.208 | 57 | 15 |
| CA10        | chr17 | 49932057 | A      | T | --          | --          | Intron          | SNP | 0.276 | 55 | 21 |
| CA10        | chr17 | 50218793 | A      | G | --          | --          | Intron          | SNP | 0.340 | 33 | 17 |
| --          | chr17 | 50252243 | G      | T | --          | --          | IGR             | SNP | 0.481 | 27 | 25 |
| --          | chr17 | 50280816 | G      | T | --          | --          | IGR             | SNP | 0.173 | 43 | 9  |
| --          | chr17 | 50593826 | C      | A | --          | --          | IGR             | SNP | 0.541 | 28 | 33 |
| --          | chr17 | 50603705 | CTTATT | - | --          | --          | IGR             | DEL | 0.351 | 50 | 27 |
| --          | chr17 | 50636435 | G      | T | --          | --          | IGR             | SNP | 0.277 | 47 | 18 |

|                    |       |          |       |     |    |    |        |     |       |     |     |
|--------------------|-------|----------|-------|-----|----|----|--------|-----|-------|-----|-----|
| --                 | chr17 | 50636454 | G     | T   | -- | -- | IGR    | SNP | 0.215 | 51  | 14  |
| --                 | chr17 | 51075316 | G     | A   | -- | -- | IGR    | SNP | 0.370 | 46  | 27  |
| --                 | chr17 | 51215827 | A     | C   | -- | -- | IGR    | SNP | 0.180 | 82  | 18  |
| --                 | chr17 | 51302073 | A     | G   | -- | -- | IGR    | SNP | 0.143 | 72  | 12  |
| --                 | chr17 | 51372612 | C     | T   | -- | -- | IGR    | SNP | 0.123 | 64  | 9   |
| --                 | chr17 | 51407471 | T     | C   | -- | -- | IGR    | SNP | 0.234 | 59  | 18  |
| --                 | chr17 | 51428033 | G     | A   | -- | -- | IGR    | SNP | 0.280 | 54  | 21  |
| --                 | chr17 | 51521060 | T     | C   | -- | -- | IGR    | SNP | 0.135 | 64  | 10  |
| --                 | chr17 | 51672315 | T     | G   | -- | -- | IGR    | SNP | 0.299 | 75  | 32  |
| --                 | chr17 | 51761417 | G     | T   | -- | -- | IGR    | SNP | 0.108 | 58  | 7   |
| --                 | chr17 | 51803867 | T     | G   | -- | -- | IGR    | SNP | 0.117 | 83  | 11  |
| --                 | chr17 | 51905205 | A     | T   | -- | -- | IGR    | SNP | 0.135 | 32  | 5   |
| --                 | chr17 | 51922575 | C     | T   | -- | -- | IGR    | SNP | 0.346 | 53  | 28  |
| --                 | chr17 | 52055329 | T     | C   | -- | -- | IGR    | SNP | 0.126 | 83  | 12  |
| --                 | chr17 | 52055330 | G     | T   | -- | -- | IGR    | SNP | 0.137 | 82  | 13  |
| --                 | chr17 | 52061666 | T     | A   | -- | -- | IGR    | SNP | 0.171 | 68  | 14  |
| --                 | chr17 | 52061667 | G     | T   | -- | -- | IGR    | SNP | 0.177 | 65  | 14  |
| --                 | chr17 | 52068276 | C     | T   | -- | -- | IGR    | SNP | 0.575 | 34  | 46  |
| --                 | chr17 | 52077011 | G     | A   | -- | -- | IGR    | SNP | 0.185 | 66  | 15  |
| --                 | chr17 | 52155187 | T     | A   | -- | -- | IGR    | SNP | 0.132 | 59  | 9   |
| --                 | chr17 | 52155947 | A     | T   | -- | -- | IGR    | SNP | 0.134 | 58  | 9   |
| --                 | chr17 | 52374215 | T     | A   | -- | -- | IGR    | SNP | 0.619 | 75  | 122 |
| --                 | chr17 | 52376383 | A     | T   | -- | -- | IGR    | SNP | 0.113 | 94  | 12  |
| --                 | chr17 | 52378553 | C     | A   | -- | -- | IGR    | SNP | 0.634 | 63  | 109 |
| --                 | chr17 | 52385279 | A     | G   | -- | -- | IGR    | SNP | 0.438 | 114 | 89  |
| --                 | chr17 | 52385436 | A     | G   | -- | -- | IGR    | SNP | 0.429 | 89  | 67  |
| --                 | chr17 | 52519129 | G     | C   | -- | -- | IGR    | SNP | 0.130 | 80  | 12  |
| --                 | chr17 | 52541296 | A     | G   | -- | -- | IGR    | SNP | 0.135 | 64  | 10  |
| --                 | chr17 | 52566690 | C     | A   | -- | -- | IGR    | SNP | 0.130 | 60  | 9   |
| --                 | chr17 | 52673501 | C     | T   | -- | -- | IGR    | SNP | 0.367 | 31  | 18  |
| --                 | chr17 | 52721446 | C     | A   | -- | -- | IGR    | SNP | 0.155 | 49  | 9   |
| --                 | chr17 | 52867567 | C     | A   | -- | -- | IGR    | SNP | 0.786 | 27  | 99  |
| --                 | chr17 | 52877907 | G     | A   | -- | -- | IGR    | SNP | 0.140 | 80  | 13  |
| --                 | chr17 | 52885589 | C     | G   | -- | -- | IGR    | SNP | 0.262 | 79  | 28  |
| --                 | chr17 | 52890987 | C     | G   | -- | -- | IGR    | SNP | 0.182 | 112 | 25  |
| --                 | chr17 | 52916941 | A     | T   | -- | -- | IGR    | SNP | 0.105 | 94  | 11  |
| <i>TOM1L1</i>      | chr17 | 53036090 | T     | A   | -- | -- | Intron | SNP | 0.118 | 30  | 4   |
| <i>STXBP4</i>      | chr17 | 53179228 | A     | T   | -- | -- | Intron | SNP | 0.125 | 98  | 14  |
| --                 | chr17 | 53287663 | T     | G   | -- | -- | IGR    | SNP | 0.150 | 91  | 16  |
| --                 | chr17 | 53330328 | G     | T   | -- | -- | IGR    | SNP | 0.134 | 58  | 9   |
| <i>HLF</i>         | chr17 | 53363517 | C     | G   | -- | -- | Intron | SNP | 0.714 | 32  | 80  |
| --                 | chr17 | 53680291 | T     | C   | -- | -- | IGR    | SNP | 0.116 | 84  | 11  |
| <i>TMEM100</i>     | chr17 | 53808283 | A     | T   | -- | -- | Intron | SNP | 0.158 | 133 | 25  |
| --                 | chr17 | 53868806 | C     | A   | -- | -- | IGR    | SNP | 0.273 | 8   | 3   |
| --                 | chr17 | 53962524 | G     | A   | -- | -- | IGR    | SNP | 0.145 | 65  | 11  |
| --                 | chr17 | 54017736 | T     | C   | -- | -- | IGR    | SNP | 0.246 | 92  | 30  |
| --                 | chr17 | 54066526 | C     | A   | -- | -- | IGR    | SNP | 0.121 | 124 | 17  |
| --                 | chr17 | 54186709 | C     | G   | -- | -- | IGR    | SNP | 0.120 | 176 | 24  |
| --                 | chr17 | 54571875 | C     | G   | -- | -- | IGR    | SNP | 0.286 | 15  | 6   |
| --                 | chr17 | 54664880 | G     | T   | -- | -- | IGR    | SNP | 0.344 | 21  | 11  |
| --                 | chr17 | 54843713 | G     | T   | -- | -- | IGR    | SNP | 0.286 | 10  | 4   |
| <i>SCPEP1</i>      | chr17 | 55078660 | TTTAA | -   | -- | -- | Intron | DEL | 0.500 | 16  | 16  |
| <i>MSI2</i>        | chr17 | 55641403 | C     | G   | -- | -- | Intron | SNP | 0.333 | 20  | 10  |
| <i>MSI2</i>        | chr17 | 55730097 | C     | A   | -- | -- | Intron | SNP | 0.150 | 34  | 6   |
| --                 | chr17 | 55776407 | T     | A   | -- | -- | IGR    | SNP | 0.750 | 2   | 6   |
| --                 | chr17 | 55895359 | AAG   | -   | -- | -- | IGR    | DEL | 0.111 | 24  | 3   |
| <i>CUEDC1</i>      | chr17 | 55967359 | A     | C   | -- | -- | Intron | SNP | 0.923 | 3   | 36  |
| <i>CUEDC1</i>      | chr17 | 55974128 | C     | T   | -- | -- | Intron | SNP | 0.375 | 5   | 3   |
| --                 | chr17 | 55990896 | -     | CA  | -- | -- | IGR    | INS | 0.276 | 21  | 8   |
| --                 | chr17 | 56067786 | A     | G   | -- | -- | IGR    | SNP | 0.129 | 27  | 4   |
| --                 | chr17 | 56219270 | G     | T   | -- | -- | IGR    | SNP | 0.200 | 12  | 3   |
| --                 | chr17 | 56369054 | -     | CAT | -- | -- | IGR    | INS | 0.292 | 84  | 35  |
| <i>HSF5</i>        | chr17 | 56519684 | A     | C   | -- | -- | Intron | SNP | 0.351 | 74  | 40  |
| <i>MTMR4</i>       | chr17 | 56579537 | G     | T   | -- | -- | Intron | SNP | 0.133 | 26  | 4   |
| <i>TEX14</i>       | chr17 | 56678753 | C     | T   | -- | -- | Intron | SNP | 0.139 | 31  | 5   |
| --                 | chr17 | 56817154 | G     | T   | -- | -- | IGR    | SNP | 0.111 | 32  | 4   |
| --                 | chr17 | 56830517 | G     | C   | -- | -- | IGR    | SNP | 0.194 | 54  | 13  |
| <i>PPM1E</i>       | chr17 | 56946022 | A     | T   | -- | -- | Intron | SNP | 0.300 | 49  | 21  |
| <i>PPM1E</i>       | chr17 | 56947031 | C     | T   | -- | -- | Intron | SNP | 0.145 | 47  | 8   |
| <i>PPM1E</i>       | chr17 | 57030572 | C     | T   | -- | -- | Intron | SNP | 0.118 | 75  | 10  |
| <i>TRIM37</i>      | chr17 | 57105089 | C     | T   | -- | -- | Intron | SNP | 0.250 | 60  | 20  |
| <i>TRIM37</i>      | chr17 | 57114953 | C     | T   | -- | -- | Intron | SNP | 0.104 | 43  | 5   |
| <i>PRR11</i>       | chr17 | 57234151 | G     | A   | -- | -- | Intron | SNP | 0.242 | 69  | 22  |
| <i>PRR11</i>       | chr17 | 57239076 | A     | G   | -- | -- | Intron | SNP | 0.356 | 65  | 36  |
| <i>GDPD1</i>       | chr17 | 57302471 | G     | T   | -- | -- | Intron | SNP | 0.100 | 36  | 4   |
| <i>GDPD1</i>       | chr17 | 57321514 | C     | A   | -- | -- | Intron | SNP | 0.118 | 82  | 11  |
| <i>TBC1D3P1-D1</i> | chr17 | 58090888 | T     | C   | -- | -- | RNA    | SNP | 0.102 | 88  | 10  |
| --                 | chr17 | 58207733 | G     | T   | -- | -- | IGR    | SNP | 0.103 | 87  | 10  |
| <i>USP32</i>       | chr17 | 58459162 | C     | T   | -- | -- | Intron | SNP | 0.144 | 173 | 29  |
| --                 | chr17 | 58750587 | A     | G   | -- | -- | IGR    | SNP | 0.146 | 76  | 13  |

|            |       |          |    |     |             |             |                 |     |       |     |     |
|------------|-------|----------|----|-----|-------------|-------------|-----------------|-----|-------|-----|-----|
| BCAS3      | chr17 | 58918927 | TG | -   | --          | --          | Intron          | DEL | 0.118 | 82  | 11  |
| BCAS3      | chr17 | 59315407 | G  | A   | --          | --          | Intron          | SNP | 0.171 | 121 | 25  |
| --         | chr17 | 59472813 | A  | C   | --          | --          | IGR             | SNP | 0.840 | 39  | 204 |
| TBX2       | chr17 | 59476302 | G  | A   | --          | --          | 5'Flank         | SNP | 0.141 | 170 | 28  |
| --         | chr17 | 59641237 | T  | G   | --          | --          | IGR             | SNP | 0.117 | 144 | 19  |
| MED13      | chr17 | 60119943 | C  | A   | --          | --          | Intron          | SNP | 0.119 | 104 | 14  |
| --         | chr17 | 60223858 | G  | A   | --          | --          | IGR             | SNP | 0.103 | 52  | 6   |
| --         | chr17 | 60702302 | G  | A   | --          | --          | IGR             | SNP | 0.148 | 109 | 19  |
| TANC2      | chr17 | 61389065 | T  | C   | --          | --          | Intron          | SNP | 0.153 | 50  | 9   |
| KCNH6      | chr17 | 61612256 | C  | G   | --          | --          | Intron          | SNP | 0.347 | 49  | 26  |
| KCNH6      | chr17 | 61613031 | C  | G   | C1103G      | T368S       | Missense_mutati | SNP | 0.336 | 79  | 40  |
| KCNH6      | chr17 | 61614607 | C  | G   | --          | --          | Intron          | SNP | 0.288 | 52  | 21  |
| KCNH6      | chr17 | 61615532 | C  | G   | C1608G,C144 | I536M,I483M | Missense_mutati | SNP | 0.315 | 63  | 29  |
| MAP3K3     | chr17 | 61701148 | A  | T   | --          | --          | Intron          | SNP | 0.111 | 88  | 11  |
| MAP3K3     | chr17 | 61722304 | G  | T   | --          | --          | Intron          | SNP | 0.100 | 81  | 9   |
| DDX42      | chr17 | 61887611 | A  | T   | --          | --          | Intron          | SNP | 0.121 | 29  | 4   |
| ERN1       | chr17 | 62178645 | T  | C   | --          | --          | Intron          | SNP | 0.274 | 53  | 20  |
| --         | chr17 | 62381082 | C  | T   | --          | --          | IGR             | SNP | 0.611 | 37  | 58  |
| SMURF2     | chr17 | 62559718 | G  | T   | --          | --          | Intron          | SNP | 0.241 | 44  | 14  |
| --         | chr17 | 63122657 | T  | C   | --          | --          | IGR             | SNP | 0.287 | 67  | 27  |
| --         | chr17 | 63128543 | G  | T   | --          | --          | IGR             | SNP | 0.160 | 84  | 16  |
| RGS9       | chr17 | 63133329 | C  | A   | --          | --          | 5'Flank         | SNP | 0.239 | 54  | 17  |
| --         | chr17 | 63424446 | A  | G   | --          | --          | IGR             | SNP | 0.186 | 48  | 11  |
| --         | chr17 | 63424448 | G  | A   | --          | --          | IGR             | SNP | 0.193 | 46  | 11  |
| --         | chr17 | 63511198 | A  | T   | --          | --          | IGR             | SNP | 0.161 | 47  | 9   |
| CEP112     | chr17 | 63696331 | G  | A   | --          | --          | Intron          | SNP | 0.103 | 148 | 17  |
| CEP112     | chr17 | 63698017 | T  | G   | --          | --          | Intron          | SNP | 0.119 | 52  | 7   |
| CEP112     | chr17 | 63856029 | A  | G   | --          | --          | Intron          | SNP | 0.146 | 35  | 6   |
| CEP112     | chr17 | 64006086 | T  | A   | --          | --          | Intron          | SNP | 0.115 | 69  | 9   |
| CEP112     | chr17 | 64182983 | C  | G   | --          | --          | Intron          | SNP | 0.123 | 50  | 7   |
| PRKCA      | chr17 | 64341725 | T  | A   | --          | --          | Intron          | SNP | 0.175 | 47  | 10  |
| PRKCA      | chr17 | 64411229 | C  | T   | --          | --          | Intron          | SNP | 0.413 | 27  | 19  |
| PRKCA      | chr17 | 64728246 | T  | A   | --          | --          | Intron          | SNP | 0.188 | 39  | 9   |
| HELZ       | chr17 | 65128369 | A  | T   | --          | --          | Intron          | SNP | 0.119 | 59  | 8   |
| --         | chr17 | 65256271 | C  | T   | --          | --          | IGR             | SNP | 0.569 | 28  | 37  |
| --         | chr17 | 65366963 | C  | T   | --          | --          | IGR             | SNP | 0.558 | 38  | 48  |
| PITPNC1    | chr17 | 65526226 | G  | T   | --          | --          | Intron          | SNP | 0.364 | 14  | 8   |
| PITPNC1    | chr17 | 65564446 | T  | C   | --          | --          | Intron          | SNP | 0.165 | 96  | 19  |
| --         | chr17 | 65780719 | C  | T   | --          | --          | IGR             | SNP | 0.303 | 62  | 27  |
| ARSG,SLC16 | chr17 | 66280267 | G  | A   | --          | --          | Intron          | SNP | 0.190 | 17  | 4   |
| WIPI1      | chr17 | 66421187 | C  | G   | --          | --          | Intron          | SNP | 0.234 | 72  | 22  |
| --         | chr17 | 66705430 | G  | A   | --          | --          | IGR             | SNP | 0.143 | 30  | 5   |
| --         | chr17 | 66968329 | C  | G   | --          | --          | IGR             | SNP | 0.333 | 28  | 14  |
| ABCA10     | chr17 | 67188204 | G  | A   | --          | --          | Intron          | SNP | 0.246 | 49  | 16  |
| ABCA5      | chr17 | 67272229 | T  | G   | --          | --          | Intron          | SNP | 0.160 | 21  | 4   |
| ABCA5      | chr17 | 67315532 | G  | A   | --          | --          | Intron          | SNP | 0.117 | 53  | 7   |
| --         | chr17 | 67344505 | G  | T   | --          | --          | IGR             | SNP | 0.103 | 61  | 7   |
| MAP2K6     | chr17 | 67456346 | G  | A   | --          | --          | Intron          | SNP | 0.290 | 49  | 20  |
| --         | chr17 | 67597119 | -  | CAT | --          | --          | IGR             | INS | 0.179 | 46  | 10  |
| --         | chr17 | 67756432 | C  | A   | --          | --          | IGR             | SNP | 0.110 | 73  | 9   |
| --         | chr17 | 67756433 | T  | C   | --          | --          | IGR             | SNP | 0.110 | 73  | 9   |
| --         | chr17 | 67951864 | C  | A   | --          | --          | IGR             | SNP | 0.102 | 97  | 11  |
| --         | chr17 | 68296821 | G  | A   | --          | --          | IGR             | SNP | 0.219 | 57  | 16  |
| --         | chr17 | 68298425 | C  | A   | --          | --          | IGR             | SNP | 0.303 | 53  | 23  |
| --         | chr17 | 68345477 | A  | G   | --          | --          | IGR             | SNP | 0.322 | 61  | 29  |
| --         | chr17 | 68698668 | C  | T   | --          | --          | IGR             | SNP | 0.235 | 26  | 8   |
| --         | chr17 | 68743067 | G  | A   | --          | --          | IGR             | SNP | 0.288 | 37  | 15  |
| --         | chr17 | 68811884 | G  | C   | --          | --          | IGR             | SNP | 0.200 | 32  | 8   |
| --         | chr17 | 68925590 | T  | A   | --          | --          | IGR             | SNP | 0.200 | 36  | 9   |
| --         | chr17 | 68999467 | T  | G   | --          | --          | IGR             | SNP | 0.286 | 30  | 12  |
| --         | chr17 | 69013280 | G  | A   | --          | --          | IGR             | SNP | 0.267 | 11  | 4   |
| --         | chr17 | 69139253 | A  | G   | --          | --          | IGR             | SNP | 0.250 | 36  | 12  |
| --         | chr17 | 69158424 | A  | C   | --          | --          | IGR             | SNP | 0.240 | 38  | 12  |
| --         | chr17 | 69361588 | A  | C   | --          | --          | IGR             | SNP | 0.605 | 17  | 26  |
| --         | chr17 | 69434155 | G  | A   | --          | --          | IGR             | SNP | 0.556 | 12  | 15  |
| --         | chr17 | 69580996 | A  | G   | --          | --          | IGR             | SNP | 0.308 | 9   | 4   |
| --         | chr17 | 69619163 | G  | T   | --          | --          | IGR             | SNP | 0.167 | 20  | 4   |
| --         | chr17 | 69937105 | T  | A   | --          | --          | IGR             | SNP | 0.186 | 35  | 8   |
| --         | chr17 | 70007540 | T  | C   | --          | --          | IGR             | SNP | 0.294 | 48  | 20  |
| --         | chr17 | 70258198 | A  | G   | --          | --          | IGR             | SNP | 0.116 | 38  | 5   |
| SLC39A11   | chr17 | 70647357 | C  | T   | --          | --          | Intron          | SNP | 0.453 | 41  | 34  |
| SLC39A11   | chr17 | 70867283 | T  | A   | --          | --          | Intron          | SNP | 0.136 | 57  | 9   |
| SDK2       | chr17 | 71503977 | G  | C   | --          | --          | Intron          | SNP | 0.240 | 73  | 23  |
| LINC00469  | chr17 | 71752144 | G  | A   | --          | --          | RNA             | SNP | 0.293 | 41  | 17  |
| --         | chr17 | 71901010 | C  | T   | --          | --          | IGR             | SNP | 0.152 | 39  | 7   |
| --         | chr17 | 71992493 | C  | T   | --          | --          | IGR             | SNP | 0.382 | 21  | 13  |
| TTYH2      | chr17 | 72233000 | G  | T   | --          | --          | Intron          | SNP | 0.302 | 30  | 13  |
| DNAI2      | chr17 | 72303744 | A  | C   | --          | --          | Intron          | SNP | 0.125 | 35  | 5   |
| --         | chr17 | 72425392 | C  | T   | --          | --          | IGR             | SNP | 0.415 | 24  | 17  |
| --         | chr17 | 72595589 | C  | A   | --          | --          | IGR             | SNP | 0.113 | 55  | 7   |

|             |       |          |      |   |       |      |         |     |       |    |    |
|-------------|-------|----------|------|---|-------|------|---------|-----|-------|----|----|
| --          | chr17 | 73006820 | G    | T | --    | --   | IGR     | SNP | 0.360 | 32 | 18 |
| --          | chr17 | 73152753 | G    | T | --    | --   | IGR     | SNP | 0.600 | 2  | 3  |
| GGA3        | chr17 | 73251369 | T    | A | --    | --   | Intron  | SNP | 0.235 | 13 | 4  |
| --          | chr17 | 73310736 | G    | C | --    | --   | IGR     | SNP | 0.480 | 26 | 24 |
| KIAA0195    | chr17 | 73463625 | G    | T | --    | --   | Intron  | SNP | 0.357 | 9  | 5  |
| RECQL5      | chr17 | 73626479 | C    | G | --    | --   | Intron  | SNP | 0.547 | 43 | 52 |
| --          | chr17 | 73767967 | C    | T | --    | --   | IGR     | SNP | 0.260 | 74 | 26 |
| --          | chr17 | 73768388 | C    | T | --    | --   | IGR     | SNP | 0.437 | 40 | 31 |
| --          | chr17 | 73768552 | C    | T | --    | --   | IGR     | SNP | 0.414 | 17 | 12 |
| --          | chr17 | 73768741 | C    | G | --    | --   | IGR     | SNP | 0.483 | 30 | 28 |
| RNF157      | chr17 | 74197404 | C    | A | --    | --   | Intron  | SNP | 0.190 | 17 | 4  |
| QRICH2      | chr17 | 74291806 | C    | A | --    | --   | Intron  | SNP | 0.396 | 29 | 19 |
| RHBDF2      | chr17 | 74488981 | C    | T | --    | --   | Intron  | SNP | 0.256 | 58 | 20 |
| --          | chr17 | 74547758 | C    | G | --    | --   | IGR     | SNP | 0.130 | 40 | 6  |
| LOC10050724 | chr17 | 74558690 | G    | A | --    | --   | RNA     | SNP | 0.133 | 26 | 4  |
| --          | chr17 | 74590701 | G    | A | --    | --   | IGR     | SNP | 0.189 | 60 | 14 |
| --          | chr17 | 74837474 | A    | C | --    | --   | IGR     | SNP | 0.174 | 19 | 4  |
| --          | chr17 | 75011235 | G    | A | --    | --   | IGR     | SNP | 0.121 | 29 | 4  |
| --          | chr17 | 75046750 | C    | T | --    | --   | IGR     | SNP | 0.467 | 32 | 28 |
| 9-Sep       | chr17 | 75331869 | A    | G | --    | --   | Intron  | SNP | 0.306 | 25 | 11 |
| LOC10050735 | chr17 | 75557848 | C    | T | --    | --   | RNA     | SNP | 0.192 | 21 | 5  |
| --          | chr17 | 75643672 | T    | C | --    | --   | IGR     | SNP | 0.523 | 51 | 56 |
| --          | chr17 | 75744059 | T    | A | --    | --   | IGR     | SNP | 0.145 | 47 | 8  |
| --          | chr17 | 75855263 | G    | A | --    | --   | IGR     | SNP | 0.284 | 58 | 23 |
| --          | chr17 | 76108279 | C    | T | --    | --   | IGR     | SNP | 0.227 | 58 | 17 |
| --          | chr17 | 76350433 | A    | G | --    | --   | IGR     | SNP | 0.104 | 43 | 5  |
| SOCS3       | chr17 | 76355318 | C    | T | --    | --   | Intron  | SNP | 0.200 | 24 | 6  |
| --          | chr17 | 76371490 | C    | G | --    | --   | IGR     | SNP | 0.557 | 43 | 54 |
| DNAH17      | chr17 | 76481559 | G    | C | --    | --   | Intron  | SNP | 0.160 | 84 | 16 |
| --          | chr17 | 76578390 | T    | C | --    | --   | IGR     | SNP | 0.529 | 41 | 46 |
| RBFOX3      | chr17 | 77187234 | A    | G | --    | --   | Intron  | SNP | 0.188 | 65 | 15 |
| RBFOX3      | chr17 | 77312806 | T    | A | --    | --   | Intron  | SNP | 0.386 | 43 | 27 |
| RBFOX3      | chr17 | 77312807 | A    | T | --    | --   | Intron  | SNP | 0.371 | 44 | 26 |
| RBFOX3      | chr17 | 77345001 | G    | C | --    | --   | Intron  | SNP | 0.278 | 57 | 22 |
| RBFOX3      | chr17 | 77386796 | C    | G | --    | --   | Intron  | SNP | 0.103 | 70 | 8  |
| RBFOX3      | chr17 | 77460070 | C    | G | --    | --   | Intron  | SNP | 0.142 | 97 | 16 |
| --          | chr17 | 77529685 | G    | A | --    | --   | IGR     | SNP | 0.138 | 56 | 9  |
| --          | chr17 | 77648948 | T    | A | --    | --   | IGR     | SNP | 0.165 | 71 | 14 |
| --          | chr17 | 77906631 | C    | A | --    | --   | IGR     | SNP | 0.141 | 67 | 11 |
| TBC1D16     | chr17 | 77963337 | G    | C | --    | --   | Intron  | SNP | 0.133 | 98 | 15 |
| TBC1D16     | chr17 | 77980205 | C    | G | --    | --   | Intron  | SNP | 0.342 | 48 | 25 |
| CCDC40      | chr17 | 78068063 | T    | A | --    | --   | Intron  | SNP | 0.103 | 35 | 4  |
| --          | chr17 | 78107642 | C    | T | --    | --   | IGR     | SNP | 0.115 | 85 | 11 |
| --          | chr17 | 78462832 | G    | T | --    | --   | IGR     | SNP | 0.625 | 3  | 5  |
| BAIAP2      | chr17 | 79051132 | C    | T | --    | --   | Intron  | SNP | 0.396 | 29 | 19 |
| AATK        | chr17 | 79115753 | CT   | - | --    | --   | Intron  | DEL | 0.133 | 26 | 4  |
| AATK        | chr17 | 79115759 | TTCC | - | --    | --   | Intron  | DEL | 0.103 | 26 | 3  |
| --          | chr17 | 79491266 | G    | T | --    | --   | IGR     | SNP | 0.323 | 42 | 20 |
| ARHGDI      | chr17 | 79824670 | C    | G | --    | --   | 3'Flank | SNP | 0.600 | 22 | 33 |
| ARHGDI      | chr17 | 79824764 | C    | G | --    | --   | 3'Flank | SNP | 0.509 | 26 | 27 |
| ASPSCR1     | chr17 | 79958039 | G    | C | --    | --   | Intron  | SNP | 0.605 | 32 | 49 |
| CCDC57      | chr17 | 80108006 | A    | T | --    | --   | Intron  | SNP | 0.178 | 37 | 8  |
| HEXDC       | chr17 | 80396463 | T    | C | --    | --   | Intron  | SNP | 0.424 | 38 | 28 |
| FO XK2      | chr17 | 80476821 | G    | T | --    | --   | 5'Flank | SNP | 0.304 | 16 | 7  |
| FO XK2      | chr17 | 80476823 | A    | T | --    | --   | 5'Flank | SNP | 0.538 | 12 | 14 |
| FO XK2      | chr17 | 80539370 | G    | T | --    | --   | Intron  | SNP | 0.235 | 13 | 4  |
| FN3K        | chr17 | 80696454 | C    | T | C231T | 1771 | Silent  | SNP | 0.694 | 22 | 50 |
| TBCD        | chr17 | 80724809 | A    | G | --    | --   | Intron  | SNP | 0.229 | 37 | 11 |
| B3GNTL1     | chr17 | 80929504 | C    | T | --    | --   | Intron  | SNP | 0.156 | 27 | 5  |
| B3GNTL1     | chr17 | 80929751 | T    | A | --    | --   | Intron  | SNP | 0.129 | 27 | 4  |
| B3GNTL1     | chr17 | 80980186 | A    | G | --    | --   | Intron  | SNP | 0.125 | 42 | 6  |
| B3GNTL1     | chr17 | 80980188 | G    | T | --    | --   | Intron  | SNP | 0.152 | 39 | 7  |
| B3GNTL1     | chr17 | 80990084 | G    | A | --    | --   | Intron  | SNP | 0.143 | 30 | 5  |
| --          | chr17 | 81120383 | G    | C | --    | --   | IGR     | SNP | 0.125 | 35 | 5  |
| --          | chr17 | 81121045 | G    | A | --    | --   | IGR     | SNP | 0.143 | 30 | 5  |
| --          | chr17 | 81121078 | G    | A | --    | --   | IGR     | SNP | 0.222 | 21 | 6  |
| --          | chr17 | 81163994 | T    | C | --    | --   | IGR     | SNP | 0.205 | 58 | 15 |
| --          | chr17 | 81164030 | A    | C | --    | --   | IGR     | SNP | 0.302 | 44 | 19 |
| --          | chr18 | 32997    | T    | C | --    | --   | IGR     | SNP | 0.123 | 50 | 7  |
| --          | chr18 | 43833    | A    | G | --    | --   | IGR     | SNP | 0.167 | 45 | 9  |
| --          | chr18 | 292206   | T    | G | --    | --   | IGR     | SNP | 0.250 | 42 | 14 |
| COLEC12     | chr18 | 446612   | G    | C | --    | --   | Intron  | SNP | 0.290 | 22 | 9  |
| --          | chr18 | 554558   | A    | T | --    | --   | IGR     | SNP | 0.125 | 21 | 3  |
| TYMS        | chr18 | 667322   | T    | A | --    | --   | Intron  | SNP | 0.167 | 45 | 9  |
| --          | chr18 | 969686   | C    | G | --    | --   | IGR     | SNP | 0.300 | 21 | 9  |
| --          | chr18 | 973964   | A    | C | --    | --   | IGR     | SNP | 0.200 | 12 | 3  |
| --          | chr18 | 982251   | C    | G | --    | --   | IGR     | SNP | 0.491 | 28 | 27 |
| --          | chr18 | 1153310  | A    | T | --    | --   | IGR     | SNP | 0.604 | 21 | 32 |
| LINC00470   | chr18 | 1269179  | A    | G | --    | --   | RNA     | SNP | 0.556 | 4  | 5  |
| LINC00470   | chr18 | 1274504  | A    | G | --    | --   | RNA     | SNP | 0.478 | 24 | 22 |

|            |       |          |      |    |              |             |                 |     |       |    |    |
|------------|-------|----------|------|----|--------------|-------------|-----------------|-----|-------|----|----|
| --         | chr18 | 1413968  | G    | A  | --           | --          | IGR             | SNP | 0.104 | 43 | 5  |
| --         | chr18 | 1419772  | G    | T  | --           | --          | IGR             | SNP | 0.476 | 11 | 10 |
| --         | chr18 | 1482296  | C    | T  | --           | --          | IGR             | SNP | 0.511 | 22 | 23 |
| --         | chr18 | 1569049  | T    | C  | --           | --          | IGR             | SNP | 0.136 | 38 | 6  |
| --         | chr18 | 1750050  | -    | GA | --           | --          | IGR             | INS | 0.115 | 46 | 6  |
| --         | chr18 | 1765004  | G    | T  | --           | --          | IGR             | SNP | 0.386 | 35 | 22 |
| --         | chr18 | 1775757  | A    | T  | --           | --          | IGR             | SNP | 0.426 | 35 | 26 |
| --         | chr18 | 1911271  | C    | A  | --           | --          | IGR             | SNP | 0.426 | 31 | 23 |
| --         | chr18 | 2020943  | T    | C  | --           | --          | IGR             | SNP | 0.378 | 23 | 14 |
| --         | chr18 | 2283339  | C    | T  | --           | --          | IGR             | SNP | 0.460 | 27 | 23 |
| --         | chr18 | 2339782  | C    | T  | --           | --          | IGR             | SNP | 0.190 | 34 | 8  |
| --         | chr18 | 2359456  | T    | C  | --           | --          | IGR             | SNP | 0.296 | 38 | 16 |
| --         | chr18 | 2485277  | C    | A  | --           | --          | IGR             | SNP | 0.354 | 31 | 17 |
| METTL4     | chr18 | 2546760  | G    | A  | --           | --          | Intron          | SNP | 0.135 | 32 | 5  |
| --         | chr18 | 2621245  | AAAG | -  | --           | --          | IGR             | DEL | 0.136 | 19 | 3  |
| SMCHD1     | chr18 | 2781809  | G    | A  | --           | --          | Intron          | SNP | 0.170 | 44 | 9  |
| EMILIN2    | chr18 | 2893278  | T    | C  | --           | --          | Intron          | SNP | 0.167 | 70 | 14 |
| MYOM1      | chr18 | 3083445  | G    | T  | --           | --          | Intron          | SNP | 0.160 | 21 | 4  |
| DLGAP1     | chr18 | 3749170  | G    | T  | --           | --          | Intron          | SNP | 0.222 | 14 | 4  |
| DLGAP1     | chr18 | 4057895  | G    | C  | --           | --          | Intron          | SNP | 0.372 | 49 | 29 |
| DLGAP1     | chr18 | 4319436  | G    | A  | --           | --          | Intron          | SNP | 0.132 | 33 | 5  |
| DLGAP1     | chr18 | 4441706  | C    | T  | --           | --          | Intron          | SNP | 0.388 | 30 | 19 |
| --         | chr18 | 4530089  | A    | T  | --           | --          | IGR             | SNP | 0.135 | 45 | 7  |
| --         | chr18 | 4579018  | C    | A  | --           | --          | IGR             | SNP | 0.450 | 33 | 27 |
| --         | chr18 | 4601715  | A    | G  | --           | --          | IGR             | SNP | 0.457 | 19 | 16 |
| --         | chr18 | 4634942  | A    | G  | --           | --          | IGR             | SNP | 0.173 | 43 | 9  |
| --         | chr18 | 4734460  | C    | A  | --           | --          | IGR             | SNP | 0.511 | 23 | 24 |
| --         | chr18 | 4910706  | C    | A  | --           | --          | IGR             | SNP | 0.306 | 25 | 11 |
| --         | chr18 | 4978170  | C    | A  | --           | --          | IGR             | SNP | 0.349 | 28 | 15 |
| --         | chr18 | 5077499  | G    | T  | --           | --          | IGR             | SNP | 0.485 | 17 | 16 |
| --         | chr18 | 5088642  | CG   | -  | --           | --          | IGR             | DEL | 0.167 | 40 | 8  |
| LOC339290  | chr18 | 5243363  | C    | T  | --           | --          | RNA             | SNP | 0.188 | 26 | 6  |
| LOC339290  | chr18 | 5243372  | A    | T  | --           | --          | RNA             | SNP | 0.182 | 27 | 6  |
| --         | chr18 | 5352022  | G    | T  | --           | --          | IGR             | SNP | 0.574 | 23 | 31 |
| EPB41L3    | chr18 | 5482141  | C    | T  | --           | --          | Intron          | SNP | 0.341 | 29 | 15 |
| --         | chr18 | 5580568  | C    | T  | --           | --          | IGR             | SNP | 0.492 | 33 | 32 |
| --         | chr18 | 5684980  | G    | A  | --           | --          | IGR             | SNP | 0.267 | 11 | 4  |
| --         | chr18 | 5710136  | G    | T  | --           | --          | IGR             | SNP | 0.483 | 30 | 28 |
| --         | chr18 | 5904337  | -    | TG | --           | --          | IGR             | INS | 0.130 | 40 | 6  |
| --         | chr18 | 5929221  | C    | T  | --           | --          | IGR             | SNP | 0.636 | 16 | 28 |
| L3MBTL4    | chr18 | 6034365  | C    | G  | --           | --          | Intron          | SNP | 0.480 | 13 | 12 |
| L3MBTL4    | chr18 | 6161972  | CTG  | -  | --           | --          | Intron          | DEL | 0.167 | 15 | 3  |
| L3MBTL4    | chr18 | 6329150  | C    | T  | --           | --          | Intron          | SNP | 0.138 | 25 | 4  |
| --         | chr18 | 6463909  | T    | A  | --           | --          | IGR             | SNP | 0.232 | 43 | 13 |
| --         | chr18 | 6464096  | G    | C  | --           | --          | IGR             | SNP | 0.163 | 41 | 8  |
| LOC1001304 | chr18 | 6538632  | A    | C  | --           | --          | Intron          | SNP | 0.395 | 23 | 15 |
| --         | chr18 | 7132389  | T    | C  | --           | --          | IGR             | SNP | 0.184 | 40 | 9  |
| --         | chr18 | 7340645  | G    | T  | --           | --          | IGR             | SNP | 0.160 | 21 | 4  |
| --         | chr18 | 7538025  | G    | A  | --           | --          | IGR             | SNP | 0.114 | 39 | 5  |
| PTPRM      | chr18 | 7625267  | A    | C  | --           | --          | Intron          | SNP | 0.233 | 33 | 10 |
| PTPRM      | chr18 | 7829301  | T    | A  | --           | --          | Intron          | SNP | 0.123 | 50 | 7  |
| PTPRM      | chr18 | 7842945  | T    | G  | --           | --          | Intron          | SNP | 0.421 | 11 | 8  |
| PTPRM      | chr18 | 7894596  | T    | A  | --           | --          | Intron          | SNP | 0.412 | 10 | 7  |
| PTPRM      | chr18 | 7935971  | A    | T  | --           | --          | Intron          | SNP | 0.520 | 24 | 26 |
| PTPRM      | chr18 | 7972524  | G    | A  | --           | --          | Intron          | SNP | 0.200 | 16 | 4  |
| PTPRM      | chr18 | 7988150  | T    | G  | --           | --          | Intron          | SNP | 0.204 | 39 | 10 |
| PTPRM      | chr18 | 8018009  | C    | T  | --           | --          | Intron          | SNP | 0.259 | 43 | 15 |
| PTPRM      | chr18 | 8036528  | G    | A  | --           | --          | Intron          | SNP | 0.471 | 27 | 24 |
| PTPRM      | chr18 | 8387229  | T    | A  | T4165A,T420< | C1389S,C140 | Missense_mutati | SNP | 0.167 | 35 | 7  |
| --         | chr18 | 8697336  | C    | A  | --           | --          | IGR             | SNP | 0.675 | 13 | 27 |
| CCDC165    | chr18 | 8768808  | G    | T  | --           | --          | Intron          | SNP | 0.211 | 15 | 4  |
| --         | chr18 | 8842838  | T    | A  | --           | --          | IGR             | SNP | 0.111 | 32 | 4  |
| --         | chr18 | 8849252  | C    | A  | --           | --          | IGR             | SNP | 0.133 | 65 | 10 |
| --         | chr18 | 8907214  | GTA  | -  | --           | --          | IGR             | DEL | 0.105 | 17 | 2  |
| --         | chr18 | 9009961  | G    | A  | --           | --          | IGR             | SNP | 0.143 | 24 | 4  |
| NDUFV2     | chr18 | 9134095  | A    | C  | --           | --          | Intron          | SNP | 0.364 | 35 | 20 |
| RAB31      | chr18 | 9721600  | G    | A  | --           | --          | Intron          | SNP | 0.370 | 29 | 17 |
| RAB31      | chr18 | 9750509  | C    | T  | --           | --          | Intron          | SNP | 0.255 | 41 | 14 |
| --         | chr18 | 9869568  | C    | G  | --           | --          | IGR             | SNP | 0.200 | 52 | 13 |
| --         | chr18 | 10170665 | A    | T  | --           | --          | IGR             | SNP | 0.410 | 36 | 25 |
| --         | chr18 | 10214030 | C    | A  | --           | --          | IGR             | SNP | 0.100 | 45 | 5  |
| --         | chr18 | 10493491 | C    | T  | --           | --          | IGR             | SNP | 0.317 | 28 | 13 |
| --         | chr18 | 10571585 | G    | A  | --           | --          | IGR             | SNP | 0.157 | 43 | 8  |
| PIEZO2     | chr18 | 10717552 | A    | C  | --           | --          | Intron          | SNP | 0.137 | 44 | 7  |
| PIEZO2     | chr18 | 10934634 | C    | T  | --           | --          | Intron          | SNP | 0.148 | 23 | 4  |
| --         | chr18 | 11229160 | A    | T  | --           | --          | IGR             | SNP | 0.150 | 34 | 6  |
| --         | chr18 | 11229161 | G    | T  | --           | --          | IGR             | SNP | 0.154 | 33 | 6  |
| --         | chr18 | 11335940 | A    | C  | --           | --          | IGR             | SNP | 0.156 | 65 | 12 |
| --         | chr18 | 11410893 | T    | C  | --           | --          | IGR             | SNP | 0.350 | 26 | 14 |
| --         | chr18 | 11438461 | A    | T  | --           | --          | IGR             | SNP | 0.214 | 33 | 9  |

|            |       |          |        |   |    |    |         |     |       |    |    |
|------------|-------|----------|--------|---|----|----|---------|-----|-------|----|----|
| GNAL       | chr18 | 11805103 | A      | G | -- | -- | Intron  | SNP | 0.126 | 76 | 11 |
| GNAL       | chr18 | 11858904 | T      | A | -- | -- | Intron  | SNP | 0.102 | 44 | 5  |
| --         | chr18 | 11911947 | C      | T | -- | -- | IGR     | SNP | 0.243 | 28 | 9  |
| --         | chr18 | 12136524 | G      | A | -- | -- | IGR     | SNP | 0.161 | 26 | 5  |
| --         | chr18 | 12139117 | G      | C | -- | -- | IGR     | SNP | 0.129 | 27 | 4  |
| --         | chr18 | 12173936 | C      | T | -- | -- | IGR     | SNP | 0.147 | 29 | 5  |
| --         | chr18 | 12173937 | A      | G | -- | -- | IGR     | SNP | 0.152 | 28 | 5  |
| SPIRE1     | chr18 | 12448502 | C      | T | -- | -- | 3'UTR   | SNP | 0.194 | 50 | 12 |
| PSMG2      | chr18 | 12705577 | T      | A | -- | -- | Intron  | SNP | 0.146 | 35 | 6  |
| PTPN2      | chr18 | 12873810 | C      | T | -- | -- | Intron  | SNP | 0.120 | 22 | 3  |
| PTPN2      | chr18 | 12874015 | C      | A | -- | -- | Intron  | SNP | 0.200 | 16 | 4  |
| --         | chr18 | 13140819 | G      | T | -- | -- | IGR     | SNP | 0.250 | 12 | 4  |
| C18orf1    | chr18 | 13226448 | C      | A | -- | -- | Intron  | SNP | 0.489 | 24 | 23 |
| C18orf1    | chr18 | 13310200 | T      | A | -- | -- | Intron  | SNP | 0.154 | 22 | 4  |
| C18orf1    | chr18 | 13386945 | A      | G | -- | -- | Intron  | SNP | 0.115 | 46 | 6  |
| C18orf1    | chr18 | 13497012 | CAGTA  | - | -- | -- | Intron  | DEL | 0.194 | 54 | 13 |
| C18orf19   | chr18 | 13673847 | A      | T | -- | -- | Intron  | SNP | 0.133 | 26 | 4  |
| C18orf19   | chr18 | 13673848 | C      | A | -- | -- | Intron  | SNP | 0.133 | 26 | 4  |
| C18orf19   | chr18 | 13676074 | GTGA   | - | -- | -- | Intron  | DEL | 0.185 | 22 | 5  |
| C18orf19   | chr18 | 13690667 | T      | A | -- | -- | Intron  | SNP | 0.314 | 24 | 11 |
| MC2R       | chr18 | 13904916 | C      | T | -- | -- | Intron  | SNP | 0.327 | 37 | 18 |
| --         | chr18 | 14044948 | C      | T | -- | -- | IGR     | SNP | 0.433 | 34 | 26 |
| ZNF519     | chr18 | 14111414 | T      | A | -- | -- | Intron  | SNP | 0.529 | 16 | 18 |
| ANKRD20A5F | chr18 | 14214554 | C      | G | -- | -- | RNA     | SNP | 0.156 | 27 | 5  |
| --         | chr18 | 14233535 | T      | A | -- | -- | IGR     | SNP | 0.103 | 26 | 3  |
| --         | chr18 | 14236249 | A      | G | -- | -- | IGR     | SNP | 0.302 | 30 | 13 |
| --         | chr18 | 14239913 | G      | T | -- | -- | IGR     | SNP | 0.111 | 48 | 6  |
| --         | chr18 | 14269248 | C      | T | -- | -- | IGR     | SNP | 0.194 | 29 | 7  |
| --         | chr18 | 14275069 | T      | A | -- | -- | IGR     | SNP | 0.105 | 34 | 4  |
| --         | chr18 | 14465105 | A      | C | -- | -- | IGR     | SNP | 0.111 | 24 | 3  |
| --         | chr18 | 14465112 | G      | T | -- | -- | IGR     | SNP | 0.107 | 25 | 3  |
| CXADRP3    | chr18 | 14491165 | T      | C | -- | -- | RNA     | SNP | 0.119 | 37 | 5  |
| --         | chr18 | 14503700 | A      | C | -- | -- | IGR     | SNP | 0.107 | 50 | 6  |
| --         | chr18 | 14507939 | G      | A | -- | -- | IGR     | SNP | 0.132 | 46 | 7  |
| --         | chr18 | 14508479 | ATAC   | - | -- | -- | IGR     | DEL | 0.173 | 43 | 9  |
| POTEC      | chr18 | 14539112 | A      | T | -- | -- | Intron  | SNP | 0.176 | 28 | 6  |
| POTEC      | chr18 | 14541625 | G      | A | -- | -- | Intron  | SNP | 0.206 | 27 | 7  |
| --         | chr18 | 14547599 | CATCTT | - | -- | -- | IGR     | DEL | 0.118 | 15 | 2  |
| --         | chr18 | 14555560 | A      | T | -- | -- | IGR     | SNP | 0.273 | 24 | 9  |
| --         | chr18 | 14628034 | CT     | - | -- | -- | IGR     | DEL | 0.208 | 42 | 11 |
| --         | chr18 | 14672930 | G      | C | -- | -- | IGR     | SNP | 0.263 | 14 | 5  |
| --         | chr18 | 14717896 | CA     | - | -- | -- | IGR     | DEL | 0.130 | 47 | 7  |
| ANKRD30B   | chr18 | 14843582 | G      | A | -- | -- | Intron  | SNP | 0.391 | 14 | 9  |
| ANKRD30B   | chr18 | 14846251 | CTA    | - | -- | -- | Intron  | DEL | 0.172 | 24 | 5  |
| ANKRD30B   | chr18 | 14850448 | C      | T | -- | -- | Intron  | SNP | 0.148 | 23 | 4  |
| --         | chr18 | 14881035 | G      | A | -- | -- | IGR     | SNP | 0.156 | 38 | 7  |
| --         | chr18 | 14896989 | T      | A | -- | -- | IGR     | SNP | 0.182 | 27 | 6  |
| --         | chr18 | 14984262 | A      | G | -- | -- | IGR     | SNP | 0.125 | 21 | 3  |
| --         | chr18 | 15096229 | G      | T | -- | -- | IGR     | SNP | 0.586 | 12 | 17 |
| --         | chr18 | 15110060 | T      | G | -- | -- | IGR     | SNP | 0.229 | 27 | 8  |
| --         | chr18 | 15118267 | T      | G | -- | -- | IGR     | SNP | 0.233 | 23 | 7  |
| --         | chr18 | 15143623 | A      | G | -- | -- | IGR     | SNP | 0.224 | 38 | 11 |
| --         | chr18 | 15174594 | T      | A | -- | -- | IGR     | SNP | 0.111 | 24 | 3  |
| --         | chr18 | 15175348 | T      | A | -- | -- | IGR     | SNP | 0.102 | 44 | 5  |
| --         | chr18 | 15179344 | A      | G | -- | -- | IGR     | SNP | 0.182 | 27 | 6  |
| --         | chr18 | 15179550 | T      | C | -- | -- | IGR     | SNP | 0.156 | 38 | 7  |
| --         | chr18 | 15192552 | T      | C | -- | -- | IGR     | SNP | 0.138 | 25 | 4  |
| --         | chr18 | 15199105 | A      | G | -- | -- | IGR     | SNP | 0.207 | 23 | 6  |
| --         | chr18 | 15200044 | T      | C | -- | -- | IGR     | SNP | 0.143 | 24 | 4  |
| --         | chr18 | 15203501 | G      | A | -- | -- | IGR     | SNP | 0.190 | 34 | 8  |
| --         | chr18 | 15206731 | C      | G | -- | -- | IGR     | SNP | 0.125 | 42 | 6  |
| --         | chr18 | 15237351 | G      | C | -- | -- | IGR     | SNP | 0.455 | 12 | 10 |
| --         | chr18 | 15280562 | A      | T | -- | -- | IGR     | SNP | 0.136 | 38 | 6  |
| --         | chr18 | 15296017 | G      | C | -- | -- | IGR     | SNP | 0.174 | 19 | 4  |
| LOC644669  | chr18 | 15313201 | A      | C | -- | -- | 3'Flank | SNP | 0.154 | 33 | 6  |
| LOC644669  | chr18 | 15314214 | G      | A | -- | -- | RNA     | SNP | 0.260 | 37 | 13 |
| --         | chr18 | 15327786 | T      | C | -- | -- | IGR     | SNP | 0.143 | 42 | 7  |
| --         | chr18 | 15332529 | A      | G | -- | -- | IGR     | SNP | 0.103 | 61 | 7  |
| --         | chr18 | 15339719 | C      | T | -- | -- | IGR     | SNP | 0.129 | 27 | 4  |
| --         | chr18 | 15380311 | A      | C | -- | -- | IGR     | SNP | 0.143 | 36 | 6  |
| --         | chr18 | 15398892 | C      | A | -- | -- | IGR     | SNP | 0.163 | 36 | 7  |
| --         | chr18 | 15398893 | T      | A | -- | -- | IGR     | SNP | 0.167 | 35 | 7  |
| --         | chr18 | 15406231 | G      | A | -- | -- | IGR     | SNP | 0.147 | 29 | 5  |
| --         | chr18 | 15406245 | G      | A | -- | -- | IGR     | SNP | 0.147 | 29 | 5  |
| --         | chr18 | 18527907 | C      | T | -- | -- | IGR     | SNP | 0.103 | 35 | 4  |
| ROCK1      | chr18 | 18655326 | G      | C | -- | -- | Intron  | SNP | 0.521 | 34 | 37 |
| ESCO1      | chr18 | 19168078 | C      | A | -- | -- | Intron  | SNP | 0.205 | 35 | 9  |
| --         | chr18 | 19700044 | G      | T | -- | -- | IGR     | SNP | 0.143 | 24 | 4  |
| --         | chr18 | 19933491 | C      | T | -- | -- | IGR     | SNP | 0.192 | 42 | 10 |
| --         | chr18 | 20113957 | G      | T | -- | -- | IGR     | SNP | 0.250 | 12 | 4  |

|                  |       |          |     |      |    |    |        |     |       |    |    |
|------------------|-------|----------|-----|------|----|----|--------|-----|-------|----|----|
| --               | chr18 | 20183588 | CA  | -    | -- | -- | IGR    | DEL | 0.429 | 40 | 30 |
| --               | chr18 | 20666736 | G   | T    | -- | -- | IGR    | SNP | 0.149 | 57 | 10 |
| --               | chr18 | 21074628 | G   | C    | -- | -- | IGR    | SNP | 0.531 | 15 | 17 |
| <i>NPC1</i>      | chr18 | 21154686 | T   | A    | -- | -- | Intron | SNP | 0.153 | 50 | 9  |
| <i>LAMA3</i>     | chr18 | 21372089 | G   | A    | -- | -- | Intron | SNP | 0.163 | 41 | 8  |
| <i>LAMA3</i>     | chr18 | 21380099 | T   | A    | -- | -- | Intron | SNP | 0.129 | 61 | 9  |
| <i>OSBPL1A</i>   | chr18 | 21888359 | T   | A    | -- | -- | Intron | SNP | 0.179 | 23 | 5  |
| --               | chr18 | 22373952 | T   | A    | -- | -- | IGR    | SNP | 0.333 | 32 | 16 |
| --               | chr18 | 22393645 | G   | T    | -- | -- | IGR    | SNP | 0.353 | 33 | 18 |
| --               | chr18 | 22558835 | C   | T    | -- | -- | IGR    | SNP | 0.491 | 29 | 28 |
| <i>ZNF521</i>    | chr18 | 22865696 | G   | A    | -- | -- | Intron | SNP | 0.116 | 38 | 5  |
| <i>ZNF521</i>    | chr18 | 22865940 | C   | T    | -- | -- | Intron | SNP | 0.394 | 43 | 28 |
| --               | chr18 | 23123439 | G   | A    | -- | -- | IGR    | SNP | 0.455 | 36 | 30 |
| --               | chr18 | 23506444 | G   | T    | -- | -- | IGR    | SNP | 0.434 | 30 | 23 |
| <i>PSMA8</i>     | chr18 | 23747828 | A   | T    | -- | -- | Intron | SNP | 0.160 | 21 | 4  |
| <i>LOC728606</i> | chr18 | 24274917 | T   | A    | -- | -- | RNA    | SNP | 0.191 | 38 | 9  |
| --               | chr18 | 24361691 | C   | G    | -- | -- | IGR    | SNP | 0.447 | 26 | 21 |
| --               | chr18 | 24423093 | C   | G    | -- | -- | IGR    | SNP | 0.130 | 47 | 7  |
| <i>CHST9</i>     | chr18 | 24567304 | T   | G    | -- | -- | Intron | SNP | 0.138 | 50 | 8  |
| --               | chr18 | 24804792 | T   | A    | -- | -- | IGR    | SNP | 0.181 | 59 | 13 |
| --               | chr18 | 24822066 | G   | A    | -- | -- | IGR    | SNP | 0.231 | 20 | 6  |
| --               | chr18 | 24822070 | G   | A    | -- | -- | IGR    | SNP | 0.269 | 19 | 7  |
| --               | chr18 | 24860562 | T   | C    | -- | -- | IGR    | SNP | 0.286 | 10 | 4  |
| --               | chr18 | 25046027 | A   | G    | -- | -- | IGR    | SNP | 0.521 | 23 | 25 |
| --               | chr18 | 25194787 | A   | T    | -- | -- | IGR    | SNP | 0.140 | 37 | 6  |
| <i>CDH2</i>      | chr18 | 25560129 | C   | G    | -- | -- | Intron | SNP | 0.774 | 7  | 24 |
| --               | chr18 | 25812209 | ATG | -    | -- | -- | IGR    | DEL | 0.120 | 22 | 3  |
| --               | chr18 | 25845990 | GT  | -    | -- | -- | IGR    | DEL | 0.824 | 6  | 28 |
| --               | chr18 | 26015421 | T   | C    | -- | -- | IGR    | SNP | 0.368 | 24 | 14 |
| --               | chr18 | 26069352 | T   | A    | -- | -- | IGR    | SNP | 0.214 | 11 | 3  |
| --               | chr18 | 26072082 | A   | C    | -- | -- | IGR    | SNP | 0.259 | 20 | 7  |
| --               | chr18 | 26085040 | G   | T    | -- | -- | IGR    | SNP | 0.571 | 6  | 8  |
| --               | chr18 | 26185538 | C   | A    | -- | -- | IGR    | SNP | 0.360 | 16 | 9  |
| --               | chr18 | 26187743 | C   | G    | -- | -- | IGR    | SNP | 0.467 | 24 | 21 |
| --               | chr18 | 26187898 | C   | T    | -- | -- | IGR    | SNP | 0.357 | 27 | 15 |
| --               | chr18 | 26187932 | C   | A    | -- | -- | IGR    | SNP | 0.459 | 20 | 17 |
| --               | chr18 | 26188040 | C   | G    | -- | -- | IGR    | SNP | 0.509 | 26 | 27 |
| --               | chr18 | 26188294 | C   | A    | -- | -- | IGR    | SNP | 0.526 | 27 | 30 |
| --               | chr18 | 26188302 | C   | T    | -- | -- | IGR    | SNP | 0.456 | 31 | 26 |
| --               | chr18 | 26188530 | C   | G    | -- | -- | IGR    | SNP | 0.493 | 34 | 33 |
| --               | chr18 | 26188548 | C   | G    | -- | -- | IGR    | SNP | 0.518 | 27 | 29 |
| --               | chr18 | 26188680 | C   | G    | -- | -- | IGR    | SNP | 0.455 | 30 | 25 |
| --               | chr18 | 26188721 | C   | G    | -- | -- | IGR    | SNP | 0.397 | 35 | 23 |
| --               | chr18 | 26195007 | G   | A    | -- | -- | IGR    | SNP | 0.346 | 17 | 9  |
| --               | chr18 | 26368098 | A   | T    | -- | -- | IGR    | SNP | 0.423 | 15 | 11 |
| --               | chr18 | 26456281 | C   | A    | -- | -- | IGR    | SNP | 0.690 | 9  | 20 |
| --               | chr18 | 26520215 | G   | T    | -- | -- | IGR    | SNP | 0.852 | 4  | 23 |
| --               | chr18 | 26961318 | G   | A    | -- | -- | IGR    | SNP | 0.788 | 7  | 26 |
| --               | chr18 | 26964618 | GTA | -    | -- | -- | IGR    | DEL | 0.105 | 17 | 2  |
| --               | chr18 | 27838755 | G   | A    | -- | -- | IGR    | SNP | 0.786 | 3  | 11 |
| --               | chr18 | 27894167 | TTA | -    | -- | -- | IGR    | DEL | 0.118 | 15 | 2  |
| --               | chr18 | 28072030 | G   | A    | -- | -- | IGR    | SNP | 1.000 | 0  | 17 |
| --               | chr18 | 28201446 | G   | A    | -- | -- | IGR    | SNP | 0.815 | 5  | 22 |
| --               | chr18 | 28554183 | G   | C    | -- | -- | IGR    | SNP | 0.444 | 20 | 16 |
| --               | chr18 | 28943796 | C   | T    | -- | -- | IGR    | SNP | 0.346 | 17 | 9  |
| <i>B4GALT6</i>   | chr18 | 29228162 | -   | AT   | -- | -- | Intron | INS | 0.871 | 4  | 27 |
| <i>B4GALT6</i>   | chr18 | 29233398 | C   | T    | -- | -- | Intron | SNP | 0.286 | 10 | 4  |
| <i>RNF125</i>    | chr18 | 29617487 | C   | T    | -- | -- | Intron | SNP | 0.353 | 11 | 6  |
| <i>RNF138</i>    | chr18 | 29709314 | A   | C    | -- | -- | 3'UTR  | SNP | 0.125 | 21 | 3  |
| <i>RNF138</i>    | chr18 | 29709320 | A   | G    | -- | -- | 3'UTR  | SNP | 0.125 | 21 | 3  |
| --               | chr18 | 29739440 | A   | T    | -- | -- | IGR    | SNP | 0.571 | 3  | 4  |
| <i>C18orf34</i>  | chr18 | 30573359 | C   | A    | -- | -- | Intron | SNP | 0.469 | 17 | 15 |
| --               | chr18 | 31059507 | A   | T    | -- | -- | IGR    | SNP | 0.273 | 16 | 6  |
| --               | chr18 | 31133104 | A   | T    | -- | -- | IGR    | SNP | 0.276 | 21 | 8  |
| --               | chr18 | 31133105 | G   | T    | -- | -- | IGR    | SNP | 0.276 | 21 | 8  |
| <i>ASXL3</i>     | chr18 | 31269540 | G   | T    | -- | -- | Intron | SNP | 0.486 | 18 | 17 |
| --               | chr18 | 31386889 | A   | T    | -- | -- | IGR    | SNP | 0.120 | 22 | 3  |
| --               | chr18 | 31859853 | A   | T    | -- | -- | IGR    | SNP | 0.333 | 24 | 12 |
| <i>DTNA</i>      | chr18 | 32195571 | GT  | -    | -- | -- | Intron | DEL | 0.484 | 16 | 15 |
| --               | chr18 | 32766647 | C   | A    | -- | -- | IGR    | SNP | 0.385 | 16 | 10 |
| --               | chr18 | 33223717 | G   | A    | -- | -- | IGR    | SNP | 0.381 | 13 | 8  |
| --               | chr18 | 33338557 | G   | A    | -- | -- | IGR    | SNP | 0.235 | 13 | 4  |
| --               | chr18 | 33374827 | -   | CCTT | -- | -- | IGR    | INS | 0.125 | 14 | 2  |
| --               | chr18 | 33389879 | A   | G    | -- | -- | IGR    | SNP | 0.390 | 25 | 16 |
| <i>ELP2</i>      | chr18 | 33742905 | G   | A    | -- | -- | Intron | SNP | 0.175 | 33 | 7  |
| <i>FHOD3</i>     | chr18 | 33948065 | TTC | -    | -- | -- | Intron | DEL | 0.167 | 20 | 4  |
| <i>FHOD3</i>     | chr18 | 33973063 | A   | T    | -- | -- | Intron | SNP | 0.182 | 27 | 6  |
| <i>FHOD3</i>     | chr18 | 34083915 | T   | A    | -- | -- | Intron | SNP | 0.432 | 21 | 16 |
| <i>FHOD3</i>     | chr18 | 34083916 | C   | A    | -- | -- | Intron | SNP | 0.432 | 21 | 16 |
| <i>KIAA1328</i>  | chr18 | 34602915 | G   | C    | -- | -- | Intron | SNP | 0.375 | 15 | 9  |

|             |       |          |       |     |        |        |                 |     |       |    |    |
|-------------|-------|----------|-------|-----|--------|--------|-----------------|-----|-------|----|----|
| --          | chr18 | 35317597 | G     | C   | --     | --     | IGR             | SNP | 0.417 | 21 | 15 |
| --          | chr18 | 35399899 | C     | T   | --     | --     | IGR             | SNP | 0.143 | 18 | 3  |
| --          | chr18 | 35718845 | G     | A   | --     | --     | IGR             | SNP | 0.900 | 3  | 27 |
| --          | chr18 | 35824414 | C     | G   | --     | --     | IGR             | SNP | 0.378 | 28 | 17 |
| --          | chr18 | 35882774 | G     | A   | --     | --     | IGR             | SNP | 0.286 | 10 | 4  |
| --          | chr18 | 36097004 | A     | T   | --     | --     | IGR             | SNP | 0.174 | 19 | 4  |
| LOC647946   | chr18 | 36874956 | T     | A   | --     | --     | RNA             | SNP | 0.214 | 11 | 3  |
| LOC647946   | chr18 | 37292117 | T     | A   | --     | --     | RNA             | SNP | 0.226 | 24 | 7  |
| --          | chr18 | 37336109 | C     | G   | --     | --     | IGR             | SNP | 0.813 | 3  | 13 |
| --          | chr18 | 37591906 | -     | CG  | --     | --     | IGR             | INS | 0.105 | 17 | 2  |
| --          | chr18 | 37787050 | T     | C   | --     | --     | IGR             | SNP | 0.826 | 4  | 19 |
| --          | chr18 | 38271931 | TA    | -   | --     | --     | IGR             | DEL | 0.214 | 22 | 6  |
| --          | chr18 | 38724217 | TA    | -   | --     | --     | IGR             | DEL | 0.806 | 6  | 25 |
| --          | chr18 | 38743841 | G     | C   | --     | --     | IGR             | SNP | 0.345 | 19 | 10 |
| --          | chr18 | 38853345 | G     | A   | --     | --     | IGR             | SNP | 0.154 | 22 | 4  |
| --          | chr18 | 38853350 | G     | A   | --     | --     | IGR             | SNP | 0.185 | 22 | 5  |
| --          | chr18 | 38938666 | T     | A   | --     | --     | IGR             | SNP | 0.909 | 1  | 10 |
| KC6         | chr18 | 39072142 | T     | C   | --     | --     | RNA             | SNP | 0.912 | 3  | 31 |
| --          | chr18 | 39277856 | G     | A   | --     | --     | IGR             | SNP | 0.833 | 4  | 20 |
| PIK3C3      | chr18 | 39626513 | G     | A   | --     | --     | Intron          | SNP | 0.273 | 8  | 3  |
| --          | chr18 | 39949494 | G     | A   | --     | --     | IGR             | SNP | 0.810 | 4  | 17 |
| --          | chr18 | 40059313 | ATTTC | -   | --     | --     | IGR             | DEL | 0.560 | 11 | 14 |
| --          | chr18 | 40141531 | AC    | -   | --     | --     | IGR             | DEL | 0.143 | 18 | 3  |
| --          | chr18 | 40320855 | C     | A   | --     | --     | IGR             | SNP | 0.933 | 1  | 14 |
| RIT2        | chr18 | 40375222 | C     | T   | --     | --     | Intron          | SNP | 0.563 | 7  | 9  |
| RIT2        | chr18 | 40431592 | TG    | -   | --     | --     | Intron          | DEL | 0.313 | 11 | 5  |
| --          | chr18 | 40732517 | -     | CAT | --     | --     | IGR             | INS | 0.111 | 16 | 2  |
| --          | chr18 | 40948599 | C     | A   | --     | --     | IGR             | SNP | 0.682 | 7  | 15 |
| --          | chr18 | 41040311 | C     | T   | --     | --     | IGR             | SNP | 1.000 | 0  | 26 |
| --          | chr18 | 41171539 | -     | GT  | --     | --     | IGR             | INS | 0.441 | 19 | 15 |
| --          | chr18 | 41517085 | -     | AAT | --     | --     | IGR             | INS | 0.632 | 7  | 12 |
| --          | chr18 | 41595485 | G     | T   | --     | --     | IGR             | SNP | 0.429 | 8  | 6  |
| --          | chr18 | 41630787 | G     | A   | --     | --     | IGR             | SNP | 0.136 | 19 | 3  |
| --          | chr18 | 42244722 | A     | C   | --     | --     | IGR             | SNP | 0.346 | 17 | 9  |
| SETBP1      | chr18 | 42532819 | G     | C   | G3514C | G1172R | Missense_mutati | SNP | 0.897 | 3  | 26 |
| SETBP1      | chr18 | 42619721 | T     | C   | --     | --     | Intron          | SNP | 0.780 | 11 | 39 |
| --          | chr18 | 42742016 | T     | C   | --     | --     | IGR             | SNP | 0.149 | 40 | 7  |
| SLC14A2     | chr18 | 43074243 | C     | A   | --     | --     | Intron          | SNP | 0.813 | 6  | 26 |
| --          | chr18 | 43381877 | C     | A   | --     | --     | IGR             | SNP | 0.105 | 34 | 4  |
| LOXHD1      | chr18 | 44210198 | C     | A   | --     | --     | Intron          | SNP | 0.250 | 27 | 9  |
| --          | chr18 | 44511258 | G     | A   | --     | --     | IGR             | SNP | 1.000 | 0  | 5  |
| ZBTB7C      | chr18 | 45591425 | G     | A   | --     | --     | Intron          | SNP | 0.792 | 5  | 19 |
| --          | chr18 | 45687474 | C     | T   | --     | --     | IGR             | SNP | 0.357 | 9  | 5  |
| --          | chr18 | 45832526 | T     | C   | --     | --     | IGR             | SNP | 0.200 | 24 | 6  |
| --          | chr18 | 45952350 | C     | T   | --     | --     | IGR             | SNP | 0.886 | 5  | 39 |
| --          | chr18 | 46486428 | A     | G   | --     | --     | IGR             | SNP | 0.941 | 2  | 32 |
| --          | chr18 | 46502223 | -     | AC  | --     | --     | IGR             | INS | 0.143 | 12 | 2  |
| --          | chr18 | 46521804 | T     | A   | --     | --     | IGR             | SNP | 0.405 | 22 | 15 |
| DYM         | chr18 | 46606029 | G     | A   | --     | --     | Intron          | SNP | 0.211 | 15 | 4  |
| DYM         | chr18 | 46606043 | T     | C   | --     | --     | Intron          | SNP | 0.185 | 22 | 5  |
| DYM         | chr18 | 46606057 | C     | T   | --     | --     | Intron          | SNP | 0.172 | 24 | 5  |
| --          | chr18 | 47123126 | C     | T   | --     | --     | IGR             | SNP | 0.333 | 18 | 9  |
| --          | chr18 | 47261609 | G     | T   | --     | --     | IGR             | SNP | 0.190 | 17 | 4  |
| --          | chr18 | 47268418 | T     | A   | --     | --     | IGR             | SNP | 0.400 | 6  | 4  |
| --          | chr18 | 47279939 | T     | C   | --     | --     | IGR             | SNP | 0.393 | 17 | 11 |
| --          | chr18 | 47284246 | C     | T   | --     | --     | IGR             | SNP | 0.278 | 26 | 10 |
| --          | chr18 | 47943514 | CT    | -   | --     | --     | IGR             | DEL | 0.136 | 19 | 3  |
| MAPK4       | chr18 | 48197953 | G     | T   | --     | --     | Intron          | SNP | 0.870 | 3  | 20 |
| --          | chr18 | 48361272 | A     | C   | --     | --     | IGR             | SNP | 0.235 | 13 | 4  |
| LOC10028722 | chr18 | 48999696 | G     | A   | --     | --     | RNA             | SNP | 0.781 | 7  | 25 |
| --          | chr18 | 49655606 | G     | C   | --     | --     | IGR             | SNP | 0.867 | 4  | 26 |
| --          | chr18 | 49771070 | TA    | -   | --     | --     | IGR             | DEL | 0.133 | 13 | 2  |
| DCC         | chr18 | 49924653 | T     | A   | --     | --     | Intron          | SNP | 0.452 | 17 | 14 |
| DCC         | chr18 | 49966397 | A     | T   | --     | --     | Intron          | SNP | 0.216 | 29 | 8  |
| DCC         | chr18 | 50553002 | T     | A   | --     | --     | Intron          | SNP | 0.333 | 14 | 7  |
| DCC         | chr18 | 50900119 | G     | A   | --     | --     | Intron          | SNP | 0.786 | 6  | 22 |
| --          | chr18 | 51347889 | A     | C   | --     | --     | IGR             | SNP | 0.333 | 14 | 7  |
| --          | chr18 | 51465384 | T     | A   | --     | --     | IGR             | SNP | 0.471 | 18 | 16 |
| MBD2        | chr18 | 51737761 | A     | G   | --     | --     | Intron          | SNP | 0.500 | 5  | 5  |
| --          | chr18 | 51989617 | G     | T   | --     | --     | IGR             | SNP | 0.273 | 8  | 3  |
| --          | chr18 | 52271592 | A     | G   | --     | --     | IGR             | SNP | 0.379 | 18 | 11 |
| --          | chr18 | 52352045 | T     | G   | --     | --     | IGR             | SNP | 0.348 | 15 | 8  |
| --          | chr18 | 52690791 | C     | T   | --     | --     | IGR             | SNP | 0.439 | 23 | 18 |
| TCF4        | chr18 | 53006044 | C     | A   | --     | --     | Intron          | SNP | 0.515 | 16 | 17 |
| TCF4        | chr18 | 53088130 | AG    | -   | --     | --     | Intron          | DEL | 0.235 | 13 | 4  |
| TCF4        | chr18 | 53125112 | A     | G   | --     | --     | Intron          | SNP | 0.864 | 3  | 19 |
| TCF4        | chr18 | 53178560 | T     | A   | --     | --     | Intron          | SNP | 0.667 | 2  | 4  |
| --          | chr18 | 53332008 | C     | A   | --     | --     | IGR             | SNP | 0.846 | 4  | 22 |
| --          | chr18 | 53520207 | G     | A   | --     | --     | IGR             | SNP | 0.786 | 6  | 22 |
| LOC10050547 | chr18 | 53776241 | T     | A   | --     | --     | RNA             | SNP | 0.476 | 11 | 10 |



|           |       |          |     |     |    |    |         |     |       |    |    |
|-----------|-------|----------|-----|-----|----|----|---------|-----|-------|----|----|
| --        | chr18 | 53960043 | G   | A   | -- | -- | IGR     | SNP | 0.893 | 3  | 25 |
| --        | chr18 | 54127595 | A   | T   | -- | -- | IGR     | SNP | 0.882 | 4  | 30 |
| WDR7      | chr18 | 54493803 | G   | A   | -- | -- | Intron  | SNP | 0.882 | 2  | 15 |
| --        | chr18 | 54863397 | T   | C   | -- | -- | IGR     | SNP | 0.306 | 34 | 15 |
| --        | chr18 | 54936606 | G   | A   | -- | -- | IGR     | SNP | 0.136 | 19 | 3  |
| --        | chr18 | 54936613 | A   | G   | -- | -- | IGR     | SNP | 0.136 | 19 | 3  |
| ONECUT2   | chr18 | 55147903 | G   | A   | -- | -- | 3'UTR   | SNP | 0.364 | 14 | 8  |
| ATP8B1    | chr18 | 55369563 | G   | A   | -- | -- | Intron  | SNP | 0.893 | 3  | 25 |
| ATP8B1    | chr18 | 55435837 | C   | A   | -- | -- | Intron  | SNP | 0.400 | 6  | 4  |
| --        | chr18 | 55529170 | A   | T   | -- | -- | IGR     | SNP | 0.250 | 12 | 4  |
| NEDD4L    | chr18 | 55912005 | G   | A   | -- | -- | Intron  | SNP | 0.324 | 25 | 12 |
| NEDD4L    | chr18 | 55958288 | A   | G   | -- | -- | Intron  | SNP | 0.265 | 25 | 9  |
| ZNF532    | chr18 | 56600177 | G   | C   | -- | -- | Intron  | SNP | 0.840 | 4  | 21 |
| ZNF532    | chr18 | 56606366 | C   | A   | -- | -- | Intron  | SNP | 0.348 | 15 | 8  |
| --        | chr18 | 56669974 | G   | C   | -- | -- | IGR     | SNP | 0.125 | 21 | 3  |
| --        | chr18 | 56751765 | G   | T   | -- | -- | IGR     | SNP | 0.263 | 14 | 5  |
| --        | chr18 | 56782384 | -   | AT  | -- | -- | IGR     | INS | 0.120 | 22 | 3  |
| --        | chr18 | 56945151 | AT  | -   | -- | -- | IGR     | DEL | 0.143 | 24 | 4  |
| --        | chr18 | 57079119 | C   | T   | -- | -- | IGR     | SNP | 0.111 | 32 | 4  |
| CCBE1     | chr18 | 57296027 | A   | T   | -- | -- | Intron  | SNP | 0.105 | 34 | 4  |
| --        | chr18 | 57379793 | G   | T   | -- | -- | IGR     | SNP | 0.813 | 6  | 26 |
| --        | chr18 | 57418922 | A   | T   | -- | -- | IGR     | SNP | 0.867 | 4  | 26 |
| --        | chr18 | 57702650 | T   | C   | -- | -- | IGR     | SNP | 0.500 | 3  | 3  |
| --        | chr18 | 58162550 | G   | C   | -- | -- | IGR     | SNP | 0.889 | 3  | 24 |
| --        | chr18 | 58807626 | G   | A   | -- | -- | IGR     | SNP | 0.925 | 3  | 37 |
| --        | chr18 | 58869602 | G   | T   | -- | -- | IGR     | SNP | 0.913 | 2  | 21 |
| --        | chr18 | 58898948 | C   | A   | -- | -- | IGR     | SNP | 0.871 | 4  | 27 |
| --        | chr18 | 58941933 | T   | G   | -- | -- | IGR     | SNP | 0.550 | 9  | 11 |
| --        | chr18 | 59067895 | G   | A   | -- | -- | IGR     | SNP | 0.357 | 18 | 10 |
| CDH20     | chr18 | 59184944 | GTT | -   | -- | -- | Intron  | DEL | 0.111 | 24 | 3  |
| --        | chr18 | 59341342 | -   | ACC | -- | -- | IGR     | INS | 0.111 | 16 | 2  |
| --        | chr18 | 59706845 | GC  | -   | -- | -- | IGR     | DEL | 0.136 | 19 | 3  |
| PIGN      | chr18 | 59730638 | C   | A   | -- | -- | Intron  | SNP | 0.333 | 14 | 7  |
| PIGN      | chr18 | 59824020 | A   | G   | -- | -- | Intron  | SNP | 0.318 | 15 | 7  |
| --        | chr18 | 60249070 | T   | C   | -- | -- | IGR     | SNP | 0.323 | 21 | 10 |
| PHLPP1    | chr18 | 60480534 | G   | C   | -- | -- | Intron  | SNP | 0.929 | 2  | 26 |
| KDSR      | chr18 | 61021826 | G   | C   | -- | -- | Intron  | SNP | 0.882 | 4  | 30 |
| VPS4B     | chr18 | 61088270 | C   | A   | -- | -- | Intron  | SNP | 0.250 | 12 | 4  |
| --        | chr18 | 61134365 | C   | A   | -- | -- | IGR     | SNP | 0.824 | 6  | 28 |
| --        | chr18 | 61237994 | T   | C   | -- | -- | IGR     | SNP | 0.529 | 16 | 18 |
| SERPINB4  | chr18 | 61305958 | C   | T   | -- | -- | Intron  | SNP | 0.346 | 17 | 9  |
| --        | chr18 | 61401302 | A   | T   | -- | -- | IGR     | SNP | 0.162 | 31 | 6  |
| LOC284294 | chr18 | 61931229 | T   | C   | -- | -- | RNA     | SNP | 0.125 | 21 | 3  |
| --        | chr18 | 62442743 | C   | G   | -- | -- | IGR     | SNP | 0.435 | 13 | 10 |
| --        | chr18 | 62574235 | G   | C   | -- | -- | IGR     | SNP | 0.842 | 3  | 16 |
| --        | chr18 | 62595328 | T   | A   | -- | -- | IGR     | SNP | 0.471 | 18 | 16 |
| --        | chr18 | 62789878 | G   | T   | -- | -- | IGR     | SNP | 0.486 | 18 | 17 |
| --        | chr18 | 62831582 | G   | A   | -- | -- | IGR     | SNP | 0.692 | 4  | 9  |
| --        | chr18 | 62835365 | G   | T   | -- | -- | IGR     | SNP | 0.433 | 17 | 13 |
| --        | chr18 | 62920211 | T   | G   | -- | -- | IGR     | SNP | 0.520 | 12 | 13 |
| --        | chr18 | 63043982 | GTA | -   | -- | -- | IGR     | DEL | 0.125 | 14 | 2  |
| --        | chr18 | 63047812 | G   | T   | -- | -- | IGR     | SNP | 0.852 | 4  | 23 |
| --        | chr18 | 63117127 | A   | G   | -- | -- | IGR     | SNP | 0.250 | 12 | 4  |
| --        | chr18 | 63264277 | C   | A   | -- | -- | IGR     | SNP | 0.500 | 12 | 12 |
| --        | chr18 | 63352574 | GGA | -   | -- | -- | IGR     | DEL | 0.130 | 20 | 3  |
| --        | chr18 | 63755738 | G   | A   | -- | -- | IGR     | SNP | 0.103 | 26 | 3  |
| --        | chr18 | 63853347 | GTA | -   | -- | -- | IGR     | DEL | 0.111 | 16 | 2  |
| --        | chr18 | 64290309 | T   | C   | -- | -- | IGR     | SNP | 0.455 | 18 | 15 |
| --        | chr18 | 64290310 | C   | A   | -- | -- | IGR     | SNP | 0.455 | 18 | 15 |
| --        | chr18 | 64518335 | C   | T   | -- | -- | IGR     | SNP | 0.931 | 2  | 27 |
| --        | chr18 | 64625341 | TAC | -   | -- | -- | IGR     | DEL | 0.120 | 22 | 3  |
| --        | chr18 | 64929111 | -   | GA  | -- | -- | IGR     | INS | 0.533 | 14 | 16 |
| --        | chr18 | 65147338 | C   | T   | -- | -- | IGR     | SNP | 0.286 | 10 | 4  |
| LOC643542 | chr18 | 65310626 | T   | C   | -- | -- | RNA     | SNP | 0.273 | 8  | 3  |
| LOC643542 | chr18 | 65567668 | G   | T   | -- | -- | 3'Flank | SNP | 0.121 | 29 | 4  |
| --        | chr18 | 65705586 | A   | T   | -- | -- | IGR     | SNP | 0.417 | 14 | 10 |
| --        | chr18 | 66215202 | C   | T   | -- | -- | IGR     | SNP | 0.500 | 23 | 23 |
| --        | chr18 | 66275459 | G   | T   | -- | -- | IGR     | SNP | 0.429 | 4  | 3  |
| CCDC102B  | chr18 | 66491724 | G   | T   | -- | -- | Intron  | SNP | 0.900 | 3  | 27 |
| --        | chr18 | 66871275 | A   | T   | -- | -- | IGR     | SNP | 0.452 | 17 | 14 |
| DOK6      | chr18 | 67154457 | G   | C   | -- | -- | Intron  | SNP | 0.167 | 15 | 3  |
| DOK6      | chr18 | 67176600 | G   | A   | -- | -- | Intron  | SNP | 1.000 | 0  | 21 |
| --        | chr18 | 67525984 | G   | T   | -- | -- | IGR     | SNP | 0.273 | 8  | 3  |
| RTTN      | chr18 | 67818455 | A   | T   | -- | -- | Intron  | SNP | 0.600 | 2  | 3  |
| --        | chr18 | 68203052 | TC  | -   | -- | -- | IGR     | DEL | 0.167 | 20 | 4  |
| --        | chr18 | 68266367 | T   | G   | -- | -- | IGR     | SNP | 0.829 | 6  | 29 |
| --        | chr18 | 68307194 | G   | C   | -- | -- | IGR     | SNP | 0.789 | 4  | 15 |
| --        | chr18 | 68588181 | G   | A   | -- | -- | IGR     | SNP | 0.917 | 4  | 44 |
| --        | chr18 | 68663143 | C   | G   | -- | -- | IGR     | SNP | 0.400 | 18 | 12 |
| --        | chr18 | 68711014 | G   | T   | -- | -- | IGR     | SNP | 0.929 | 2  | 26 |

|             |       |          |    |     |    |    |             |     |       |     |    |
|-------------|-------|----------|----|-----|----|----|-------------|-----|-------|-----|----|
| --          | chr18 | 68732926 | AC | -   | -- | -- | IGR         | DEL | 0.917 | 3   | 33 |
| --          | chr18 | 69297016 | G  | A   | -- | -- | IGR         | SNP | 0.158 | 16  | 3  |
| --          | chr18 | 69335778 | G  | C   | -- | -- | IGR         | SNP | 0.875 | 4   | 28 |
| --          | chr18 | 69568717 | G  | A   | -- | -- | IGR         | SNP | 0.917 | 2   | 22 |
| --          | chr18 | 69605974 | G  | C   | -- | -- | IGR         | SNP | 1.000 | 0   | 13 |
| --          | chr18 | 69919113 | T  | C   | -- | -- | IGR         | SNP | 0.588 | 14  | 20 |
| --          | chr18 | 70073676 | G  | A   | -- | -- | IGR         | SNP | 0.906 | 3   | 29 |
| --          | chr18 | 70179118 | G  | T   | -- | -- | IGR         | SNP | 0.167 | 15  | 3  |
| --          | chr18 | 70284648 | G  | A   | -- | -- | IGR         | SNP | 0.824 | 3   | 14 |
| NETO1       | chr18 | 70511918 | C  | A   | -- | -- | Intron      | SNP | 0.469 | 17  | 15 |
| --          | chr18 | 70597726 | G  | C   | -- | -- | IGR         | SNP | 0.844 | 5   | 27 |
| --          | chr18 | 70768799 | T  | C   | -- | -- | IGR         | SNP | 0.243 | 28  | 9  |
| --          | chr18 | 70806121 | A  | C   | -- | -- | IGR         | SNP | 0.400 | 3   | 2  |
| LOC400655   | chr18 | 70879882 | -  | AAG | -- | -- | RNA         | INS | 0.550 | 9   | 11 |
| LOC10050581 | chr18 | 71002669 | G  | A   | -- | -- | RNA         | SNP | 0.286 | 10  | 4  |
| --          | chr18 | 71086818 | C  | T   | -- | -- | IGR         | SNP | 0.391 | 14  | 9  |
| --          | chr18 | 71429377 | G  | A   | -- | -- | IGR         | SNP | 0.815 | 5   | 22 |
| --          | chr18 | 71448410 | -  | GA  | -- | -- | IGR         | INS | 0.333 | 16  | 8  |
| --          | chr18 | 71514692 | C  | T   | -- | -- | IGR         | SNP | 0.444 | 10  | 8  |
| ZNF407      | chr18 | 72463898 | A  | G   | -- | -- | Intron      | SNP | 0.176 | 14  | 3  |
| --          | chr18 | 72817141 | -  | CT  | -- | -- | IGR         | INS | 0.340 | 31  | 16 |
| --          | chr18 | 73427331 | C  | T   | -- | -- | IGR         | SNP | 0.840 | 4   | 21 |
| --          | chr18 | 73487689 | G  | A   | -- | -- | IGR         | SNP | 0.872 | 5   | 34 |
| --          | chr18 | 73716881 | G  | T   | -- | -- | IGR         | SNP | 0.292 | 17  | 7  |
| LOC284276   | chr18 | 74242092 | A  | T   | -- | -- | RNA         | SNP | 0.510 | 25  | 26 |
| --          | chr18 | 74328840 | A  | C   | -- | -- | IGR         | SNP | 0.391 | 14  | 9  |
| --          | chr18 | 74342413 | T  | A   | -- | -- | IGR         | SNP | 0.800 | 6   | 24 |
| MBP         | chr18 | 74748916 | T  | A   | -- | -- | Intron      | SNP | 0.167 | 25  | 5  |
| MBP         | chr18 | 74817244 | T  | C   | -- | -- | Splice_Site | SNP | 0.909 | 3   | 30 |
| --          | chr18 | 74849132 | C  | A   | -- | -- | IGR         | SNP | 0.912 | 3   | 31 |
| --          | chr18 | 75382140 | C  | T   | -- | -- | IGR         | SNP | 0.143 | 42  | 7  |
| --          | chr18 | 75439685 | A  | G   | -- | -- | IGR         | SNP | 0.897 | 3   | 26 |
| --          | chr18 | 75593839 | C  | A   | -- | -- | IGR         | SNP | 0.600 | 12  | 18 |
| --          | chr18 | 75667254 | C  | T   | -- | -- | IGR         | SNP | 0.905 | 4   | 38 |
| --          | chr18 | 75841584 | GA | -   | -- | -- | IGR         | DEL | 0.857 | 4   | 24 |
| --          | chr18 | 75920742 | G  | A   | -- | -- | IGR         | SNP | 0.382 | 21  | 13 |
| --          | chr18 | 76263038 | T  | C   | -- | -- | IGR         | SNP | 0.300 | 28  | 12 |
| --          | chr18 | 76274604 | A  | G   | -- | -- | IGR         | SNP | 0.211 | 15  | 4  |
| --          | chr18 | 76347246 | T  | C   | -- | -- | IGR         | SNP | 0.600 | 8   | 12 |
| --          | chr18 | 76361971 | G  | A   | -- | -- | IGR         | SNP | 0.739 | 6   | 17 |
| --          | chr18 | 76373872 | G  | A   | -- | -- | IGR         | SNP | 0.103 | 35  | 4  |
| --          | chr18 | 76393207 | C  | T   | -- | -- | IGR         | SNP | 0.227 | 17  | 5  |
| --          | chr18 | 76480969 | C  | T   | -- | -- | IGR         | SNP | 0.811 | 7   | 30 |
| --          | chr18 | 76542027 | C  | A   | -- | -- | IGR         | SNP | 0.467 | 8   | 7  |
| --          | chr18 | 76542366 | -  | GA  | -- | -- | IGR         | INS | 0.143 | 30  | 5  |
| --          | chr18 | 76626681 | G  | A   | -- | -- | IGR         | SNP | 0.240 | 19  | 6  |
| --          | chr18 | 76677198 | T  | A   | -- | -- | IGR         | SNP | 0.167 | 20  | 4  |
| --          | chr18 | 76776235 | C  | G   | -- | -- | IGR         | SNP | 0.364 | 7   | 4  |
| --          | chr18 | 76776836 | G  | A   | -- | -- | IGR         | SNP | 0.167 | 30  | 6  |
| --          | chr18 | 76776861 | C  | G   | -- | -- | IGR         | SNP | 0.100 | 45  | 5  |
| --          | chr18 | 76794090 | T  | G   | -- | -- | IGR         | SNP | 0.150 | 51  | 9  |
| --          | chr18 | 76799102 | T  | C   | -- | -- | IGR         | SNP | 0.156 | 27  | 5  |
| ATP9B       | chr18 | 76905397 | A  | G   | -- | -- | Intron      | SNP | 0.147 | 29  | 5  |
| ATP9B       | chr18 | 76985890 | G  | C   | -- | -- | Intron      | SNP | 0.152 | 28  | 5  |
| ATP9B       | chr18 | 77117036 | G  | A   | -- | -- | Intron      | SNP | 0.429 | 4   | 3  |
| ATP9B       | chr18 | 77117553 | T  | C   | -- | -- | Intron      | SNP | 0.167 | 20  | 4  |
| ATP9B       | chr18 | 77118826 | G  | A   | -- | -- | Intron      | SNP | 0.313 | 11  | 5  |
| KCNG2       | chr18 | 77654680 | C  | T   | -- | -- | Intron      | SNP | 0.116 | 38  | 5  |
| --          | chr18 | 77831385 | G  | C   | -- | -- | IGR         | SNP | 0.182 | 18  | 4  |
| PARD6G      | chr18 | 77958730 | C  | T   | -- | -- | Intron      | SNP | 0.302 | 30  | 13 |
| --          | chr19 | 96419    | G  | A   | -- | -- | IGR         | SNP | 0.194 | 29  | 7  |
| FLJ45445    | chr19 | 199197   | G  | A   | -- | -- | RNA         | SNP | 0.250 | 15  | 5  |
| FLJ45445    | chr19 | 200169   | G  | A   | -- | -- | RNA         | SNP | 0.141 | 55  | 9  |
| --          | chr19 | 301066   | A  | T   | -- | -- | IGR         | SNP | 0.130 | 40  | 6  |
| SHC2        | chr19 | 433257   | T  | A   | -- | -- | Intron      | SNP | 0.500 | 4   | 4  |
| ODF3L2      | chr19 | 472917   | A  | G   | -- | -- | Intron      | SNP | 0.170 | 44  | 9  |
| ODF3L2      | chr19 | 473396   | C  | T   | -- | -- | Intron      | SNP | 0.308 | 18  | 8  |
| ODF3L2      | chr19 | 473987   | A  | G   | -- | -- | Intron      | SNP | 0.124 | 106 | 15 |
| --          | chr19 | 568320   | A  | T   | -- | -- | IGR         | SNP | 0.208 | 19  | 5  |
| FSTL3       | chr19 | 683234   | G  | A   | -- | -- | 3'UTR       | SNP | 0.100 | 81  | 9  |
| --          | chr19 | 705111   | A  | G   | -- | -- | IGR         | SNP | 0.208 | 42  | 11 |
| PALM        | chr19 | 733570   | G  | A   | -- | -- | Intron      | SNP | 0.521 | 45  | 49 |
| CNN2        | chr19 | 1033815  | G  | C   | -- | -- | Intron      | SNP | 0.188 | 26  | 6  |
| C19orf24    | chr19 | 1275173  | T  | G   | -- | -- | 5'Flank     | SNP | 0.143 | 24  | 4  |
| EFNA2       | chr19 | 1300240  | A  | T   | -- | -- | 3'UTR       | SNP | 0.333 | 8   | 4  |
| --          | chr19 | 1443399  | G  | A   | -- | -- | IGR         | SNP | 0.174 | 19  | 4  |
| PLK5        | chr19 | 1524918  | T  | A   | -- | -- | Intron      | SNP | 0.176 | 103 | 22 |
| --          | chr19 | 1738542  | G  | A   | -- | -- | IGR         | SNP | 0.133 | 26  | 4  |
| ONECUT3     | chr19 | 1764999  | G  | A   | -- | -- | Intron      | SNP | 0.500 | 24  | 24 |
| ONECUT3     | chr19 | 1775929  | G  | T   | -- | -- | 3'Flank     | SNP | 0.238 | 16  | 5  |

|             |       |         |      |   |         |        |                 |     |       |     |    |
|-------------|-------|---------|------|---|---------|--------|-----------------|-----|-------|-----|----|
| ONECUT3     | chr19 | 1775930 | C    | T | --      | --     | 3'Flank         | SNP | 0.273 | 16  | 6  |
| ATP8B3      | chr19 | 1798198 | G    | T | --      | --     | Intron          | SNP | 0.220 | 32  | 9  |
| KLF16       | chr19 | 1852779 | G    | A | --      | --     | 3'UTR           | SNP | 0.250 | 36  | 12 |
| --          | chr19 | 1887845 | A    | C | --      | --     | IGR             | SNP | 0.143 | 24  | 4  |
| MKNK2       | chr19 | 2037653 | T    | A | --      | --     | 3'UTR           | SNP | 0.129 | 27  | 4  |
| SPPL2B      | chr19 | 2348854 | TCA  | - | --      | --     | Intron          | DEL | 0.157 | 166 | 31 |
| SPPL2B      | chr19 | 2349380 | TTC  | - | --      | --     | Intron          | DEL | 0.154 | 22  | 4  |
| LMNB2       | chr19 | 2432923 | C    | T | --      | --     | Intron          | SNP | 0.231 | 40  | 12 |
| GNG7        | chr19 | 2532117 | G    | A | --      | --     | Intron          | SNP | 0.438 | 18  | 14 |
| SGTA        | chr19 | 2769804 | A    | C | --      | --     | Intron          | SNP | 0.174 | 19  | 4  |
| --          | chr19 | 2818126 | G    | A | --      | --     | IGR             | SNP | 0.164 | 51  | 10 |
| ZNF554      | chr19 | 2823218 | G    | A | --      | --     | Intron          | SNP | 0.167 | 30  | 6  |
| ZNF554      | chr19 | 2827303 | G    | C | --      | --     | Intron          | SNP | 0.402 | 49  | 33 |
| ZNF554      | chr19 | 2833637 | TTTC | - | --      | --     | Intron          | DEL | 0.306 | 50  | 22 |
| ZNF554      | chr19 | 2837462 | T    | A | --      | --     | 3'Flank         | SNP | 0.167 | 20  | 4  |
| --          | chr19 | 2975642 | C    | T | --      | --     | IGR             | SNP | 0.222 | 14  | 4  |
| TLE6        | chr19 | 2984351 | G    | C | --      | --     | Intron          | SNP | 0.119 | 37  | 5  |
| CELF5       | chr19 | 3250283 | G    | C | --      | --     | Intron          | SNP | 0.438 | 18  | 14 |
| NFIC        | chr19 | 3393813 | T    | A | --      | --     | Intron          | SNP | 0.267 | 11  | 4  |
| C19orf77    | chr19 | 3477738 | A    | G | --      | --     | Intron          | SNP | 0.196 | 45  | 11 |
| --          | chr19 | 3944973 | G    | A | --      | --     | IGR             | SNP | 0.500 | 15  | 15 |
| --          | chr19 | 3948216 | G    | T | --      | --     | IGR             | SNP | 0.235 | 13  | 4  |
| CHAF1A      | chr19 | 4437282 | G    | T | --      | --     | Intron          | SNP | 0.487 | 39  | 37 |
| SEMA6B      | chr19 | 4553170 | G    | C | --      | --     | Intron          | SNP | 0.393 | 51  | 33 |
| --          | chr19 | 4571948 | C    | T | --      | --     | IGR             | SNP | 0.250 | 12  | 4  |
| --          | chr19 | 4618698 | C    | G | --      | --     | IGR             | SNP | 0.333 | 22  | 11 |
| TICAM1      | chr19 | 4829800 | G    | T | --      | --     | Intron          | SNP | 0.200 | 32  | 8  |
| --          | chr19 | 4887950 | C    | T | --      | --     | IGR             | SNP | 0.114 | 31  | 4  |
| KDM4B       | chr19 | 5023769 | A    | T | --      | --     | Intron          | SNP | 0.114 | 31  | 4  |
| KDM4B       | chr19 | 5076344 | C    | T | --      | --     | Intron          | SNP | 0.133 | 39  | 6  |
| PTPRS       | chr19 | 5228086 | C    | T | --      | --     | Intron          | SNP | 0.200 | 60  | 15 |
| PTPRS       | chr19 | 5306301 | G    | A | --      | --     | Intron          | SNP | 0.250 | 51  | 17 |
| --          | chr19 | 5361446 | C    | A | --      | --     | IGR             | SNP | 0.382 | 34  | 21 |
| --          | chr19 | 5363111 | G    | A | --      | --     | IGR             | SNP | 0.138 | 25  | 4  |
| --          | chr19 | 5379895 | T    | G | --      | --     | IGR             | SNP | 0.250 | 33  | 11 |
| FUT6        | chr19 | 5834182 | G    | C | --      | --     | Intron          | SNP | 0.127 | 48  | 7  |
| VMAC        | chr19 | 5904895 | C    | T | --      | --     | 5'UTR           | SNP | 0.292 | 34  | 14 |
| RFX2        | chr19 | 6003820 | G    | A | --      | --     | Intron          | SNP | 0.125 | 21  | 3  |
| ACSBG2      | chr19 | 6184000 | G    | C | --      | --     | Intron          | SNP | 0.456 | 31  | 26 |
| ACSBG2      | chr19 | 6184843 | G    | A | --      | --     | Intron          | SNP | 0.167 | 20  | 4  |
| --          | chr19 | 6355515 | T    | C | --      | --     | IGR             | SNP | 0.286 | 15  | 6  |
| --          | chr19 | 6355520 | A    | G | --      | --     | IGR             | SNP | 0.350 | 13  | 7  |
| --          | chr19 | 6355527 | A    | G | --      | --     | IGR             | SNP | 0.400 | 12  | 8  |
| --          | chr19 | 6521486 | T    | G | --      | --     | IGR             | SNP | 0.250 | 24  | 8  |
| --          | chr19 | 6522747 | ATGT | - | --      | --     | IGR             | DEL | 0.232 | 53  | 16 |
| --          | chr19 | 6584729 | T    | A | --      | --     | IGR             | SNP | 0.148 | 23  | 4  |
| --          | chr19 | 6641915 | C    | A | --      | --     | IGR             | SNP | 0.404 | 28  | 19 |
| VAV1        | chr19 | 6808020 | G    | A | --      | --     | Intron          | SNP | 0.357 | 9   | 5  |
| VAV1        | chr19 | 6856758 | G    | A | --      | --     | Intron          | SNP | 0.242 | 25  | 8  |
| --          | chr19 | 6863204 | T    | G | --      | --     | IGR             | SNP | 0.308 | 9   | 4  |
| --          | chr19 | 7012264 | C    | T | --      | --     | IGR             | SNP | 0.119 | 52  | 7  |
| MBD3L4      | chr19 | 7036889 | A    | G | --      | --     | 3'Flank         | SNP | 0.231 | 20  | 6  |
| MBD3L3      | chr19 | 7055350 | G    | A | --      | --     | 3'Flank         | SNP | 0.347 | 32  | 17 |
| INSR        | chr19 | 7125014 | G    | A | --      | --     | Intron          | SNP | 0.422 | 37  | 27 |
| INSR        | chr19 | 7125037 | G    | A | --      | --     | Intron          | SNP | 0.388 | 41  | 26 |
| INSR        | chr19 | 7127697 | T    | A | --      | --     | Intron          | SNP | 0.400 | 30  | 20 |
| INSR        | chr19 | 7151189 | T    | C | --      | --     | Intron          | SNP | 0.333 | 4   | 2  |
| INSR        | chr19 | 7230746 | G    | A | --      | --     | Intron          | SNP | 0.306 | 25  | 11 |
| --          | chr19 | 7454053 | T    | C | --      | --     | IGR             | SNP | 0.483 | 15  | 14 |
| --          | chr19 | 7454227 | G    | T | --      | --     | IGR             | SNP | 0.267 | 11  | 4  |
| EVI5L       | chr19 | 7913559 | G    | T | --      | --     | Intron          | SNP | 0.188 | 39  | 9  |
| --          | chr19 | 8021351 | C    | A | --      | --     | IGR             | SNP | 0.211 | 15  | 4  |
| FBN3        | chr19 | 8207427 | G    | T | --      | --     | Intron          | SNP | 0.151 | 45  | 8  |
| --          | chr19 | 8331720 | C    | G | --      | --     | IGR             | SNP | 0.235 | 13  | 4  |
| NDUFA7      | chr19 | 8382227 | G    | C | --      | --     | Intron          | SNP | 0.581 | 31  | 43 |
| LOC10050756 | chr19 | 8454116 | C    | A | --      | --     | RNA             | SNP | 0.121 | 29  | 4  |
| 2-Mar       | chr19 | 8485897 | G    | T | --      | --     | Intron          | SNP | 0.571 | 21  | 28 |
| --          | chr19 | 8580405 | G    | C | --      | --     | IGR             | SNP | 0.477 | 34  | 31 |
| OR2Z1       | chr19 | 8840865 | T    | C | --      | --     | 5'Flank         | SNP | 0.163 | 36  | 7  |
| MUC16       | chr19 | 8998766 | G    | C | --      | --     | Intron          | SNP | 0.333 | 44  | 22 |
| MUC16       | chr19 | 9057601 | A    | G | T29845C | S9949P | Missense_mutati | SNP | 0.111 | 48  | 6  |
| --          | chr19 | 9095598 | A    | G | --      | --     | IGR             | SNP | 0.171 | 29  | 6  |
| --          | chr19 | 9117906 | T    | C | --      | --     | IGR             | SNP | 0.108 | 33  | 4  |
| ZNF426      | chr19 | 9642466 | C    | T | --      | --     | Intron          | SNP | 0.260 | 37  | 13 |
| ZNF426      | chr19 | 9642480 | G    | A | --      | --     | Intron          | SNP | 0.419 | 25  | 18 |
| --          | chr19 | 9675182 | G    | C | --      | --     | IGR             | SNP | 0.426 | 31  | 23 |
| --          | chr19 | 9714414 | G    | A | --      | --     | IGR             | SNP | 0.176 | 14  | 3  |
| --          | chr19 | 9746618 | G    | C | --      | --     | IGR             | SNP | 0.424 | 38  | 28 |
| ZNF562      | chr19 | 9780454 | C    | A | --      | --     | Intron          | SNP | 0.172 | 24  | 5  |
| --          | chr19 | 9880472 | C    | T | --      | --     | IGR             | SNP | 0.500 | 18  | 18 |

|          |       |          |      |       |    |    |         |     |       |    |    |
|----------|-------|----------|------|-------|----|----|---------|-----|-------|----|----|
| --       | chr19 | 9881175  | C    | T     | -- | -- | IGR     | SNP | 0.244 | 31 | 10 |
| OLFM2    | chr19 | 10033602 | G    | A     | -- | -- | Intron  | SNP | 0.229 | 27 | 8  |
| --       | chr19 | 10055726 | A    | G     | -- | -- | IGR     | SNP | 0.133 | 26 | 4  |
| COL5A3   | chr19 | 10119208 | G    | A     | -- | -- | Intron  | SNP | 0.282 | 56 | 22 |
| C3P1     | chr19 | 10178733 | A    | T     | -- | -- | RNA     | SNP | 0.158 | 64 | 12 |
| DNMT1    | chr19 | 10299814 | G    | T     | -- | -- | Intron  | SNP | 0.182 | 18 | 4  |
| RAVER1   | chr19 | 10442384 | G    | A     | -- | -- | Intron  | SNP | 0.111 | 32 | 4  |
| TYK2     | chr19 | 10481395 | G    | A     | -- | -- | Intron  | SNP | 0.483 | 15 | 14 |
| --       | chr19 | 10640503 | G    | C     | -- | -- | IGR     | SNP | 0.211 | 15 | 4  |
| AP1M2    | chr19 | 10688195 | C    | T     | -- | -- | Intron  | SNP | 0.242 | 25 | 8  |
| DNM2     | chr19 | 10880450 | G    | C     | -- | -- | Intron  | SNP | 0.507 | 33 | 34 |
| --       | chr19 | 10950614 | G    | T     | -- | -- | IGR     | SNP | 0.292 | 34 | 14 |
| LDLR     | chr19 | 11237602 | C    | T     | -- | -- | Intron  | SNP | 0.111 | 32 | 4  |
| DOCK6    | chr19 | 11341392 | A    | T     | -- | -- | Intron  | SNP | 0.522 | 32 | 35 |
| ELOF1    | chr19 | 11666756 | G    | C     | -- | -- | Intron  | SNP | 0.333 | 38 | 19 |
| --       | chr19 | 11820885 | G    | C     | -- | -- | IGR     | SNP | 0.250 | 48 | 16 |
| ZNF700   | chr19 | 12053915 | A    | G     | -- | -- | Intron  | SNP | 0.140 | 43 | 7  |
| ZNF700   | chr19 | 12053916 | G    | T     | -- | -- | Intron  | SNP | 0.137 | 44 | 7  |
| --       | chr19 | 12231620 | C    | T     | -- | -- | IGR     | SNP | 0.286 | 15 | 6  |
| --       | chr19 | 12746610 | G    | T     | -- | -- | IGR     | SNP | 0.158 | 16 | 3  |
| MAST1    | chr19 | 12956494 | G    | C     | -- | -- | Intron  | SNP | 0.522 | 11 | 12 |
| CACNA1A  | chr19 | 13454084 | G    | A     | -- | -- | Intron  | SNP | 0.150 | 34 | 6  |
| CACNA1A  | chr19 | 13455550 | AT   | -     | -- | -- | Intron  | DEL | 0.105 | 17 | 2  |
| CACNA1A  | chr19 | 13599817 | C    | T     | -- | -- | Intron  | SNP | 0.143 | 18 | 3  |
| --       | chr19 | 13675882 | AAAC | -     | -- | -- | IGR     | DEL | 0.103 | 26 | 3  |
| --       | chr19 | 13753209 | G    | T     | -- | -- | IGR     | SNP | 0.154 | 22 | 4  |
| --       | chr19 | 13775811 | G    | A     | -- | -- | IGR     | SNP | 0.545 | 15 | 18 |
| --       | chr19 | 13842152 | C    | T     | -- | -- | IGR     | SNP | 0.351 | 48 | 26 |
| LPHN1    | chr19 | 14298931 | A    | G     | -- | -- | Intron  | SNP | 0.246 | 52 | 17 |
| --       | chr19 | 14359821 | T    | G     | -- | -- | IGR     | SNP | 0.119 | 37 | 5  |
| --       | chr19 | 14380728 | G    | A     | -- | -- | IGR     | SNP | 0.464 | 15 | 13 |
| --       | chr19 | 14406411 | A    | G     | -- | -- | IGR     | SNP | 0.122 | 36 | 5  |
| --       | chr19 | 14425342 | C    | T     | -- | -- | IGR     | SNP | 0.516 | 31 | 33 |
| --       | chr19 | 14470680 | G    | C     | -- | -- | IGR     | SNP | 0.450 | 22 | 18 |
| --       | chr19 | 14839396 | T    | C     | -- | -- | IGR     | SNP | 0.216 | 58 | 16 |
| EMR2     | chr19 | 14852524 | C    | A     | -- | -- | Intron  | SNP | 0.471 | 18 | 16 |
| --       | chr19 | 14970280 | G    | A     | -- | -- | IGR     | SNP | 0.487 | 20 | 19 |
| --       | chr19 | 15833692 | C    | T     | -- | -- | IGR     | SNP | 0.400 | 24 | 16 |
| CYP4F11  | chr19 | 16043155 | G    | C     | -- | -- | Intron  | SNP | 0.102 | 79 | 9  |
| CYP4F11  | chr19 | 16044011 | T    | C     | -- | -- | Intron  | SNP | 0.200 | 20 | 5  |
| CYP4F11  | chr19 | 16044013 | A    | G     | -- | -- | Intron  | SNP | 0.192 | 21 | 5  |
| CYP4F11  | chr19 | 16044239 | A    | G     | -- | -- | Intron  | SNP | 0.176 | 14 | 3  |
| --       | chr19 | 16174367 | GAA  | -     | -- | -- | IGR     | DEL | 0.133 | 26 | 4  |
| --       | chr19 | 16443204 | G    | C     | -- | -- | IGR     | SNP | 0.356 | 38 | 21 |
| --       | chr19 | 16443254 | G    | C     | -- | -- | IGR     | SNP | 0.302 | 37 | 16 |
| --       | chr19 | 16443965 | G    | C     | -- | -- | IGR     | SNP | 0.467 | 32 | 28 |
| --       | chr19 | 16446991 | A    | T     | -- | -- | IGR     | SNP | 0.263 | 14 | 5  |
| EPS15L1  | chr19 | 16557949 | TGA  | -     | -- | -- | Intron  | DEL | 0.145 | 47 | 8  |
| SIN3B    | chr19 | 16988322 | G    | A     | -- | -- | Intron  | SNP | 0.318 | 45 | 21 |
| CPAMD8   | chr19 | 17064884 | C    | T     | -- | -- | Intron  | SNP | 0.455 | 30 | 25 |
| CPAMD8   | chr19 | 17095206 | T    | A     | -- | -- | Intron  | SNP | 0.116 | 38 | 5  |
| MYO9B    | chr19 | 17210222 | G    | C     | -- | -- | Intron  | SNP | 0.288 | 37 | 15 |
| --       | chr19 | 17507310 | T    | C     | -- | -- | IGR     | SNP | 0.527 | 26 | 29 |
| SLC27A1  | chr19 | 17593103 | G    | A     | -- | -- | Intron  | SNP | 0.510 | 25 | 26 |
| FAM129C  | chr19 | 17659089 | G    | C     | -- | -- | Intron  | SNP | 0.203 | 59 | 15 |
| FCHO1    | chr19 | 17863566 | A    | T     | -- | -- | Intron  | SNP | 0.182 | 18 | 4  |
| B3GNT3   | chr19 | 17923005 | G    | C     | -- | -- | 3'UTR   | SNP | 0.400 | 54 | 36 |
| SLC5A5   | chr19 | 17983094 | G    | C     | -- | -- | 5'UTR   | SNP | 0.519 | 25 | 27 |
| SLC5A5   | chr19 | 17994264 | T    | G     | -- | -- | Intron  | SNP | 0.160 | 42 | 8  |
| --       | chr19 | 18201560 | T    | C     | -- | -- | IGR     | SNP | 0.224 | 52 | 15 |
| --       | chr19 | 18204121 | A    | C     | -- | -- | IGR     | SNP | 0.273 | 16 | 6  |
| MAST3    | chr19 | 18262743 | G    | T     | -- | -- | 3'Flank | SNP | 0.509 | 27 | 28 |
| PDE4C    | chr19 | 18357179 | G    | T     | -- | -- | Intron  | SNP | 0.412 | 20 | 14 |
| --       | chr19 | 18402733 | G    | C     | -- | -- | IGR     | SNP | 0.463 | 36 | 31 |
| CRTC1    | chr19 | 18867193 | G    | C     | -- | -- | Intron  | SNP | 0.167 | 20 | 4  |
| SLC25A42 | chr19 | 19187253 | T    | G     | -- | -- | Intron  | SNP | 0.117 | 53 | 7  |
| SLC25A42 | chr19 | 19189123 | G    | T     | -- | -- | Intron  | SNP | 0.373 | 47 | 28 |
| SLC25A42 | chr19 | 19191035 | G    | C     | -- | -- | Intron  | SNP | 0.494 | 42 | 41 |
| SLC25A42 | chr19 | 19194021 | G    | A     | -- | -- | Intron  | SNP | 0.439 | 37 | 29 |
| SLC25A42 | chr19 | 19201442 | G    | T     | -- | -- | Intron  | SNP | 0.404 | 34 | 23 |
| SLC25A42 | chr19 | 19202596 | G    | A     | -- | -- | Intron  | SNP | 0.103 | 52 | 6  |
| ZNF93    | chr19 | 20024860 | C    | G     | -- | -- | Intron  | SNP | 0.291 | 39 | 16 |
| --       | chr19 | 20052456 | G    | T     | -- | -- | IGR     | SNP | 0.486 | 36 | 34 |
| --       | chr19 | 20052457 | G    | T     | -- | -- | IGR     | SNP | 0.500 | 35 | 35 |
| ZNF682   | chr19 | 20146295 | A    | T     | -- | -- | Intron  | SNP | 0.243 | 28 | 9  |
| --       | chr19 | 20678743 | -    | AAGTC | -- | -- | IGR     | INS | 0.139 | 31 | 5  |
| ZNF626   | chr19 | 20819313 | G    | C     | -- | -- | Intron  | SNP | 0.400 | 15 | 10 |
| ZNF626   | chr19 | 20819619 | G    | C     | -- | -- | Intron  | SNP | 0.317 | 28 | 13 |
| ZNF626   | chr19 | 20819945 | G    | C     | -- | -- | Intron  | SNP | 0.397 | 35 | 23 |
| ZNF626   | chr19 | 20820220 | G    | A     | -- | -- | Intron  | SNP | 0.405 | 22 | 15 |

|           |       |          |    |      |    |    |        |     |       |    |    |
|-----------|-------|----------|----|------|----|----|--------|-----|-------|----|----|
| ZNF626    | chr19 | 20820466 | G  | A    | -- | -- | Intron | SNP | 0.429 | 20 | 15 |
| --        | chr19 | 20891045 | A  | G    | -- | -- | IGR    | SNP | 0.185 | 44 | 10 |
| --        | chr19 | 20918225 | A  | G    | -- | -- | IGR    | SNP | 0.350 | 26 | 14 |
| --        | chr19 | 20923281 | A  | T    | -- | -- | IGR    | SNP | 0.104 | 43 | 5  |
| --        | chr19 | 21049670 | C  | T    | -- | -- | IGR    | SNP | 0.492 | 60 | 58 |
| --        | chr19 | 21052062 | C  | G    | -- | -- | IGR    | SNP | 0.506 | 41 | 42 |
| --        | chr19 | 21052389 | C  | T    | -- | -- | IGR    | SNP | 0.375 | 50 | 30 |
| --        | chr19 | 21052445 | C  | T    | -- | -- | IGR    | SNP | 0.338 | 51 | 26 |
| --        | chr19 | 21052471 | C  | T    | -- | -- | IGR    | SNP | 0.286 | 60 | 24 |
| --        | chr19 | 21442056 | A  | G    | -- | -- | IGR    | SNP | 0.103 | 26 | 3  |
| --        | chr19 | 21754339 | A  | C    | -- | -- | IGR    | SNP | 0.271 | 43 | 16 |
| --        | chr19 | 22074874 | G  | T    | -- | -- | IGR    | SNP | 0.476 | 33 | 30 |
| --        | chr19 | 22288475 | T  | C    | -- | -- | IGR    | SNP | 0.158 | 32 | 6  |
| --        | chr19 | 22397563 | T  | G    | -- | -- | IGR    | SNP | 0.360 | 16 | 9  |
| --        | chr19 | 22445683 | G  | C    | -- | -- | IGR    | SNP | 0.226 | 41 | 12 |
| --        | chr19 | 22451828 | C  | T    | -- | -- | IGR    | SNP | 0.556 | 16 | 20 |
| ZNF98     | chr19 | 22592715 | C  | A    | -- | -- | Intron | SNP | 0.200 | 16 | 4  |
| --        | chr19 | 22612764 | A  | C    | -- | -- | IGR    | SNP | 0.250 | 24 | 8  |
| --        | chr19 | 22748150 | C  | T    | -- | -- | IGR    | SNP | 0.125 | 35 | 5  |
| --        | chr19 | 22753873 | G  | A    | -- | -- | IGR    | SNP | 0.417 | 28 | 20 |
| --        | chr19 | 22800727 | C  | A    | -- | -- | IGR    | SNP | 0.179 | 46 | 10 |
| ZNF492    | chr19 | 22839623 | A  | T    | -- | -- | Intron | SNP | 0.405 | 25 | 17 |
| --        | chr19 | 22899526 | C  | A    | -- | -- | IGR    | SNP | 0.370 | 29 | 17 |
| --        | chr19 | 22904502 | C  | T    | -- | -- | IGR    | SNP | 0.283 | 38 | 15 |
| --        | chr19 | 22906512 | G  | A    | -- | -- | IGR    | SNP | 0.231 | 50 | 15 |
| ZNF99     | chr19 | 22951831 | C  | T    | -- | -- | Intron | SNP | 0.158 | 16 | 3  |
| ZNF99     | chr19 | 22951832 | A  | C    | -- | -- | Intron | SNP | 0.143 | 18 | 3  |
| --        | chr19 | 23015741 | A  | G    | -- | -- | IGR    | SNP | 0.161 | 26 | 5  |
| --        | chr19 | 23137940 | T  | A    | -- | -- | IGR    | SNP | 0.136 | 19 | 3  |
| --        | chr19 | 23207162 | C  | T    | -- | -- | IGR    | SNP | 0.731 | 7  | 19 |
| --        | chr19 | 23764585 | -  | GA   | -- | -- | IGR    | INS | 0.273 | 32 | 12 |
| --        | chr19 | 23775207 | G  | A    | -- | -- | IGR    | SNP | 0.400 | 24 | 16 |
| --        | chr19 | 23794459 | T  | A    | -- | -- | IGR    | SNP | 0.306 | 25 | 11 |
| --        | chr19 | 23919761 | C  | G    | -- | -- | IGR    | SNP | 0.393 | 34 | 22 |
| RPSAP58   | chr19 | 23948944 | C  | T    | -- | -- | RNA    | SNP | 0.250 | 12 | 4  |
| --        | chr19 | 24096491 | C  | G    | -- | -- | IGR    | SNP | 0.509 | 27 | 28 |
| ZNF254    | chr19 | 24296493 | T  | C    | -- | -- | Intron | SNP | 0.121 | 29 | 4  |
| --        | chr19 | 24398832 | A  | G    | -- | -- | IGR    | SNP | 0.268 | 30 | 11 |
| --        | chr19 | 24567387 | C  | T    | -- | -- | IGR    | SNP | 0.278 | 65 | 25 |
| --        | chr19 | 24580010 | A  | C    | -- | -- | IGR    | SNP | 0.250 | 15 | 5  |
| --        | chr19 | 27740717 | G  | T    | -- | -- | IGR    | SNP | 0.250 | 42 | 14 |
| --        | chr19 | 27886938 | G  | C    | -- | -- | IGR    | SNP | 0.322 | 40 | 19 |
| --        | chr19 | 27901349 | C  | G    | -- | -- | IGR    | SNP | 0.490 | 25 | 24 |
| --        | chr19 | 28029957 | G  | C    | -- | -- | IGR    | SNP | 0.475 | 21 | 19 |
| --        | chr19 | 28117176 | C  | G    | -- | -- | IGR    | SNP | 0.387 | 19 | 12 |
| --        | chr19 | 28347836 | -  | TCTC | -- | -- | IGR    | INS | 0.120 | 22 | 3  |
| --        | chr19 | 28356994 | C  | A    | -- | -- | IGR    | SNP | 0.321 | 36 | 17 |
| --        | chr19 | 28459957 | G  | T    | -- | -- | IGR    | SNP | 0.375 | 5  | 3  |
| --        | chr19 | 28489570 | T  | A    | -- | -- | IGR    | SNP | 0.548 | 19 | 23 |
| --        | chr19 | 28535696 | A  | T    | -- | -- | IGR    | SNP | 0.254 | 47 | 16 |
| --        | chr19 | 28778514 | C  | T    | -- | -- | IGR    | SNP | 0.167 | 40 | 8  |
| --        | chr19 | 28942348 | A  | C    | -- | -- | IGR    | SNP | 0.574 | 23 | 31 |
| --        | chr19 | 29071072 | A  | G    | -- | -- | IGR    | SNP | 0.520 | 36 | 39 |
| --        | chr19 | 29287576 | A  | G    | -- | -- | IGR    | SNP | 0.188 | 39 | 9  |
| --        | chr19 | 29417005 | C  | G    | -- | -- | IGR    | SNP | 0.130 | 40 | 6  |
| --        | chr19 | 29634343 | T  | C    | -- | -- | IGR    | SNP | 0.291 | 39 | 16 |
| LOC284395 | chr19 | 29936612 | AG | -    | -- | -- | RNA    | DEL | 0.490 | 26 | 25 |
| LOC284395 | chr19 | 29987713 | T  | C    | -- | -- | RNA    | SNP | 0.151 | 45 | 8  |
| --        | chr19 | 30170651 | G  | T    | -- | -- | IGR    | SNP | 0.143 | 60 | 10 |
| --        | chr19 | 30322173 | T  | C    | -- | -- | IGR    | SNP | 0.317 | 43 | 20 |
| --        | chr19 | 30529532 | T  | G    | -- | -- | IGR    | SNP | 0.364 | 7  | 4  |
| --        | chr19 | 30531237 | C  | G    | -- | -- | IGR    | SNP | 0.468 | 33 | 29 |
| --        | chr19 | 30612178 | C  | A    | -- | -- | IGR    | SNP | 0.205 | 66 | 17 |
| --        | chr19 | 30623012 | C  | T    | -- | -- | IGR    | SNP | 0.286 | 50 | 20 |
| --        | chr19 | 30656049 | C  | T    | -- | -- | IGR    | SNP | 0.277 | 47 | 18 |
| ZNF536    | chr19 | 30900187 | T  | A    | -- | -- | Intron | SNP | 0.220 | 39 | 11 |
| ZNF536    | chr19 | 30905468 | T  | C    | -- | -- | Intron | SNP | 0.532 | 22 | 25 |
| ZNF536    | chr19 | 31017466 | C  | G    | -- | -- | Intron | SNP | 0.286 | 20 | 8  |
| ZNF536    | chr19 | 31032110 | T  | G    | -- | -- | Intron | SNP | 0.133 | 26 | 4  |
| ZNF536    | chr19 | 31032373 | C  | A    | -- | -- | Intron | SNP | 0.185 | 22 | 5  |
| --        | chr19 | 31136516 | A  | G    | -- | -- | IGR    | SNP | 0.218 | 43 | 12 |
| --        | chr19 | 31159640 | C  | T    | -- | -- | IGR    | SNP | 0.237 | 29 | 9  |
| --        | chr19 | 31509099 | C  | T    | -- | -- | IGR    | SNP | 0.102 | 44 | 5  |
| --        | chr19 | 31603181 | C  | A    | -- | -- | IGR    | SNP | 0.271 | 62 | 23 |
| --        | chr19 | 31603182 | T  | A    | -- | -- | IGR    | SNP | 0.282 | 61 | 24 |
| --        | chr19 | 31652848 | C  | T    | -- | -- | IGR    | SNP | 0.232 | 43 | 13 |
| --        | chr19 | 31748919 | C  | A    | -- | -- | IGR    | SNP | 0.100 | 54 | 6  |
| --        | chr19 | 31993761 | G  | A    | -- | -- | IGR    | SNP | 0.450 | 33 | 27 |
| --        | chr19 | 32075553 | T  | C    | -- | -- | IGR    | SNP | 0.419 | 25 | 18 |
| --        | chr19 | 32178295 | G  | T    | -- | -- | IGR    | SNP | 0.132 | 33 | 5  |

|             |       |          |             |   |                            |                 |         |       |       |    |    |
|-------------|-------|----------|-------------|---|----------------------------|-----------------|---------|-------|-------|----|----|
| --          | chr19 | 32219804 | G           | C | --                         | --              | IGR     | SNP   | 0.490 | 26 | 25 |
| --          | chr19 | 32460662 | A           | T | --                         | --              | IGR     | SNP   | 0.194 | 58 | 14 |
| --          | chr19 | 32522383 | C           | A | --                         | --              | IGR     | SNP   | 0.220 | 39 | 11 |
| --          | chr19 | 32608663 | A           | G | --                         | --              | IGR     | SNP   | 0.704 | 16 | 38 |
| DPY19L3     | chr19 | 32931794 | C           | A | --                         | --              | Intron  | SNP   | 0.510 | 24 | 25 |
| --          | chr19 | 33015258 | G           | A | --                         | --              | IGR     | SNP   | 0.220 | 39 | 11 |
| --          | chr19 | 33719928 | A           | T | --                         | --              | IGR     | SNP   | 0.284 | 48 | 19 |
| --          | chr19 | 33799585 | C           | G | --                         | --              | IGR     | SNP   | 0.429 | 28 | 21 |
| --          | chr19 | 33862983 | G           | T | --                         | --              | IGR     | SNP   | 0.114 | 31 | 4  |
| --          | chr19 | 34476909 | G           | C | --                         | --              | IGR     | SNP   | 0.176 | 28 | 6  |
| --          | chr19 | 34476910 | C           | T | --                         | --              | IGR     | SNP   | 0.139 | 31 | 5  |
| --          | chr19 | 34477586 | A           | T | --                         | --              | IGR     | SNP   | 0.222 | 63 | 18 |
| --          | chr19 | 34494410 | G           | T | --                         | --              | IGR     | SNP   | 0.154 | 44 | 8  |
| KIAA0355    | chr19 | 34775056 | G           | T | --                         | --              | Intron  | SNP   | 0.250 | 12 | 4  |
| --          | chr19 | 35299756 | A           | G | --                         | --              | IGR     | SNP   | 0.197 | 53 | 13 |
| SCN1B       | chr19 | 35526198 | A           | T | --                         | --              | Intron  | SNP   | 0.139 | 31 | 5  |
| LOC10012867 | chr19 | 35555421 | C           | A | --                         | --              | RNA     | SNP   | 0.153 | 61 | 11 |
| CD22        | chr19 | 35821403 | T           | A | --                         | --              | Intron  | SNP   | 0.413 | 37 | 26 |
| --          | chr19 | 35874256 | C           | A | --                         | --              | IGR     | SNP   | 0.141 | 61 | 10 |
| --          | chr19 | 35874257 | T           | A | --                         | --              | IGR     | SNP   | 0.137 | 63 | 10 |
| DMKN        | chr19 | 35995502 | G           | A | --                         | --              | Intron  | SNP   | 0.156 | 27 | 5  |
| LIN37       | chr19 | 36241848 | C           | A | --                         | --              | Intron  | SNP   | 0.156 | 27 | 5  |
| HCST        | chr19 | 36395062 | GA          | - | 282_396del,2794_94del,93_! | Frame_Shift_Del | DEL     | 0.500 | 24    | 24 |    |
| C19orf46    | chr19 | 36493459 | G           | T | --                         | --              | 3'Flank | SNP   | 0.333 | 16 | 8  |
| CLIP3       | chr19 | 36518526 | C           | T | --                         | --              | Intron  | SNP   | 0.471 | 46 | 41 |
| ZNF566      | chr19 | 36941840 | G           | A | --                         | --              | Intron  | SNP   | 0.387 | 38 | 24 |
| ZNF566      | chr19 | 36956562 | A           | T | --                         | --              | Intron  | SNP   | 0.135 | 32 | 5  |
| ZNF567      | chr19 | 37180177 | A           | T | --                         | --              | 5'Flank | SNP   | 0.121 | 29 | 4  |
| ZNF850      | chr19 | 37244196 | T           | A | --                         | --              | Intron  | SNP   | 0.364 | 14 | 8  |
| --          | chr19 | 37494089 | G           | T | --                         | --              | IGR     | SNP   | 0.173 | 43 | 9  |
| ZNF383      | chr19 | 37718857 | G           | A | --                         | --              | Intron  | SNP   | 0.211 | 45 | 12 |
| --          | chr19 | 37736385 | T           | G | --                         | --              | IGR     | SNP   | 0.120 | 22 | 3  |
| ZNF527      | chr19 | 37863393 | G           | T | --                         | --              | Intron  | SNP   | 0.167 | 20 | 4  |
| --          | chr19 | 37986384 | G           | T | --                         | --              | IGR     | SNP   | 0.325 | 27 | 13 |
| ZNF540,ZNF5 | chr19 | 38080124 | C           | A | --                         | --              | Intron  | SNP   | 0.296 | 19 | 8  |
| ZNF573      | chr19 | 38268710 | G           | A | --                         | --              | Intron  | SNP   | 0.406 | 19 | 13 |
| --          | chr19 | 38302736 | G           | C | --                         | --              | IGR     | SNP   | 0.469 | 26 | 23 |
| SIPA1L3     | chr19 | 38661507 | G           | A | --                         | --              | Intron  | SNP   | 0.197 | 61 | 15 |
| SIPA1L3     | chr19 | 38668769 | G           | T | --                         | --              | Intron  | SNP   | 0.160 | 21 | 4  |
| --          | chr19 | 38728589 | G           | C | --                         | --              | IGR     | SNP   | 0.438 | 45 | 35 |
| RYR1        | chr19 | 38952361 | G           | A | --                         | --              | Intron  | SNP   | 0.353 | 11 | 6  |
| EIF3K,MAP4K | chr19 | 39109405 | C           | G | --                         | --              | 5'Flank | SNP   | 0.246 | 46 | 15 |
| ACTN4       | chr19 | 39163092 | G           | T | --                         | --              | Intron  | SNP   | 0.138 | 25 | 4  |
| --          | chr19 | 39252147 | C           | A | --                         | --              | IGR     | SNP   | 0.206 | 27 | 7  |
| --          | chr19 | 39273679 | T           | C | --                         | --              | IGR     | SNP   | 0.300 | 21 | 9  |
| FBXO27      | chr19 | 39516391 | G           | C | --                         | --              | Intron  | SNP   | 0.125 | 28 | 4  |
| PAK4        | chr19 | 39638481 | G           | T | --                         | --              | Intron  | SNP   | 0.200 | 20 | 5  |
| --          | chr19 | 39678484 | A           | G | --                         | --              | IGR     | SNP   | 0.235 | 65 | 20 |
| --          | chr19 | 39829207 | C           | T | --                         | --              | IGR     | SNP   | 0.127 | 48 | 7  |
| MED29       | chr19 | 39883721 | C           | T | --                         | --              | Intron  | SNP   | 0.200 | 12 | 3  |
| SUPT5H      | chr19 | 39953000 | C           | G | --                         | --              | Intron  | SNP   | 0.451 | 39 | 32 |
| --          | chr19 | 40083141 | C           | T | --                         | --              | IGR     | SNP   | 0.412 | 30 | 21 |
| --          | chr19 | 40266193 | A           | G | --                         | --              | IGR     | SNP   | 0.182 | 36 | 8  |
| --          | chr19 | 40285041 | ATTTTATTTA- | - | --                         | --              | IGR     | DEL   | 0.389 | 11 | 7  |
| --          | chr19 | 40526479 | G           | T | --                         | --              | IGR     | SNP   | 0.486 | 37 | 35 |
| --          | chr19 | 40674482 | AAT         | - | --                         | --              | IGR     | DEL   | 0.171 | 29 | 6  |
| --          | chr19 | 40680367 | G           | T | --                         | --              | IGR     | SNP   | 0.220 | 46 | 13 |
| --          | chr19 | 40693436 | G           | C | --                         | --              | IGR     | SNP   | 0.510 | 25 | 26 |
| AKT2        | chr19 | 40746701 | T           | C | --                         | --              | Intron  | SNP   | 0.125 | 35 | 5  |
| PLD3        | chr19 | 40859324 | G           | A | --                         | --              | Intron  | SNP   | 0.278 | 26 | 10 |
| LTBP4       | chr19 | 41112783 | A           | T | --                         | --              | Intron  | SNP   | 0.304 | 39 | 17 |
| SNRPA       | chr19 | 41267351 | C           | T | --                         | --              | Intron  | SNP   | 0.148 | 23 | 4  |
| CYP2B7P1    | chr19 | 41446853 | A           | T | --                         | --              | RNA     | SNP   | 0.107 | 50 | 6  |
| --          | chr19 | 41478322 | G           | T | --                         | --              | IGR     | SNP   | 0.356 | 38 | 21 |
| --          | chr19 | 41583587 | T           | A | --                         | --              | IGR     | SNP   | 0.120 | 44 | 6  |
| --          | chr19 | 41670300 | C           | A | --                         | --              | IGR     | SNP   | 0.211 | 15 | 4  |
| --          | chr19 | 41956264 | C           | T | --                         | --              | IGR     | SNP   | 0.163 | 41 | 8  |
| LOC10050545 | chr19 | 41997744 | C           | T | --                         | --              | RNA     | SNP   | 0.300 | 7  | 3  |
| --          | chr19 | 42028348 | C           | T | --                         | --              | IGR     | SNP   | 0.406 | 19 | 13 |
| --          | chr19 | 42071144 | G           | T | --                         | --              | IGR     | SNP   | 0.518 | 41 | 44 |
| --          | chr19 | 42079462 | CG          | - | --                         | --              | IGR     | DEL   | 0.171 | 68 | 14 |
| CEACAM4     | chr19 | 42131780 | G           | A | --                         | --              | Intron  | SNP   | 0.227 | 34 | 10 |
| --          | chr19 | 42176207 | C           | T | --                         | --              | IGR     | SNP   | 0.543 | 16 | 19 |
| CEACAM3     | chr19 | 42307401 | G           | T | --                         | --              | Intron  | SNP   | 0.300 | 14 | 6  |
| --          | chr19 | 42457286 | C           | A | --                         | --              | IGR     | SNP   | 0.148 | 46 | 8  |
| ATP1A3      | chr19 | 42469923 | T           | G | --                         | --              | 3'Flank | SNP   | 0.136 | 38 | 6  |
| ATP1A3      | chr19 | 42488369 | AT          | - | --                         | --              | Intron  | DEL   | 0.471 | 9  | 8  |
| ATP1A3      | chr19 | 42497831 | G           | C | --                         | --              | Intron  | SNP   | 0.542 | 33 | 39 |
| GRIK5       | chr19 | 42517339 | AC          | - | --                         | --              | Intron  | DEL   | 0.115 | 23 | 3  |
| POU2F2      | chr19 | 42594899 | G           | A | --                         | --              | 3'UTR   | SNP   | 0.373 | 32 | 19 |

|                    |       |          |     |       |             |             |         |     |       |    |    |
|--------------------|-------|----------|-----|-------|-------------|-------------|---------|-----|-------|----|----|
| --                 | chr19 | 42697389 | G   | A     | --          | --          | IGR     | SNP | 0.118 | 30 | 4  |
| <i>ERF</i>         | chr19 | 42758902 | G   | C     | --          | --          | Intron  | SNP | 0.593 | 22 | 32 |
| <i>TMEM145</i>     | chr19 | 42828793 | A   | C     | --          | --          | Intron  | SNP | 0.174 | 19 | 4  |
| --                 | chr19 | 43222695 | C   | A     | --          | --          | IGR     | SNP | 0.364 | 14 | 8  |
| --                 | chr19 | 43292479 | A   | G     | --          | --          | IGR     | SNP | 0.259 | 20 | 7  |
| --                 | chr19 | 43307528 | C   | T     | --          | --          | IGR     | SNP | 0.148 | 23 | 4  |
| --                 | chr19 | 43307742 | T   | C     | --          | --          | IGR     | SNP | 0.138 | 25 | 4  |
| <i>PSG1</i>        | chr19 | 43375244 | C   | T     | --          | --          | Intron  | SNP | 0.118 | 30 | 4  |
| <i>PSG7</i>        | chr19 | 43433996 | -   | GGT   | --          | --          | Intron  | INS | 0.385 | 15 | 10 |
| --                 | chr19 | 43448322 | -   | GT    | --          | --          | IGR     | INS | 0.125 | 14 | 2  |
| --                 | chr19 | 43456240 | A   | C     | --          | --          | IGR     | SNP | 0.172 | 24 | 5  |
| --                 | chr19 | 43481143 | T   | A     | --          | --          | IGR     | SNP | 0.938 | 1  | 15 |
| --                 | chr19 | 43493903 | C   | A     | --          | --          | IGR     | SNP | 0.333 | 8  | 4  |
| <i>PSG11</i>       | chr19 | 43528199 | G   | A     | --          | --          | Intron  | SNP | 0.192 | 21 | 5  |
| <i>PSG11</i>       | chr19 | 43528275 | C   | T     | --          | --          | Intron  | SNP | 0.148 | 23 | 4  |
| <i>LOC284344</i>   | chr19 | 43724119 | A   | G     | --          | --          | RNA     | SNP | 0.109 | 57 | 7  |
| <i>LOC284344</i>   | chr19 | 43745941 | C   | A     | --          | --          | RNA     | SNP | 0.119 | 37 | 5  |
| --                 | chr19 | 43835230 | G   | T     | --          | --          | IGR     | SNP | 0.519 | 26 | 28 |
| --                 | chr19 | 43952127 | G   | T     | --          | --          | IGR     | SNP | 0.103 | 35 | 4  |
| <i>ETHE1</i>       | chr19 | 44011422 | T   | C     | --          | --          | Intron  | SNP | 0.217 | 18 | 5  |
| --                 | chr19 | 44087350 | G   | T     | --          | --          | IGR     | SNP | 0.211 | 15 | 4  |
| <i>ZNF222</i>      | chr19 | 44530681 | TTC | -     | --          | --          | Intron  | DEL | 0.114 | 31 | 4  |
| <i>ZFP112</i>      | chr19 | 44845340 | C   | A     | --          | --          | Intron  | SNP | 0.152 | 56 | 10 |
| --                 | chr19 | 44864704 | T   | C     | --          | --          | IGR     | SNP | 0.135 | 32 | 5  |
| --                 | chr19 | 45249637 | C   | G     | --          | --          | IGR     | SNP | 0.505 | 45 | 46 |
| <i>CBLC</i>        | chr19 | 45294873 | C   | A     | --          | --          | Intron  | SNP | 0.418 | 32 | 23 |
| --                 | chr19 | 45343755 | G   | A     | --          | --          | IGR     | SNP | 0.222 | 14 | 4  |
| <i>RELB</i>        | chr19 | 45516274 | C   | A     | --          | --          | Intron  | SNP | 0.100 | 36 | 4  |
| <i>LRRC68</i>      | chr19 | 45604054 | G   | T     | --          | --          | Intron  | SNP | 0.167 | 65 | 13 |
| --                 | chr19 | 45686885 | T   | C     | --          | --          | IGR     | SNP | 0.692 | 4  | 9  |
| --                 | chr19 | 45834745 | A   | T     | --          | --          | IGR     | SNP | 0.105 | 34 | 4  |
| <i>PPM1N</i>       | chr19 | 46006726 | C   | G     | --          | --          | 3'Flank | SNP | 0.375 | 30 | 18 |
| --                 | chr19 | 46006980 | C   | G     | --          | --          | IGR     | SNP | 0.420 | 29 | 21 |
| <i>VASP</i>        | chr19 | 46021261 | C   | T     | C252T       | D84D        | Silent  | SNP | 0.415 | 31 | 22 |
| <i>EML2</i>        | chr19 | 46121772 | C   | T     | --          | --          | Intron  | SNP | 0.262 | 31 | 11 |
| <i>EML2</i>        | chr19 | 46140726 | G   | T     | --          | --          | Intron  | SNP | 0.188 | 26 | 6  |
| <i>FBXO46</i>      | chr19 | 46232346 | C   | T     | --          | --          | Intron  | SNP | 0.303 | 23 | 10 |
| --                 | chr19 | 46686555 | A   | G     | --          | --          | IGR     | SNP | 0.127 | 48 | 7  |
| --                 | chr19 | 46686556 | G   | T     | --          | --          | IGR     | SNP | 0.127 | 48 | 7  |
| --                 | chr19 | 46793442 | C   | T     | --          | --          | IGR     | SNP | 0.365 | 33 | 19 |
| --                 | chr19 | 46793796 | C   | G     | --          | --          | IGR     | SNP | 0.382 | 42 | 26 |
| --                 | chr19 | 46794219 | C   | G     | --          | --          | IGR     | SNP | 0.432 | 25 | 19 |
| --                 | chr19 | 46794267 | C   | G     | --          | --          | IGR     | SNP | 0.315 | 37 | 17 |
| <i>HIF3A</i>       | chr19 | 46812036 | C   | T     | --          | --          | Intron  | SNP | 0.194 | 54 | 13 |
| <i>HIF3A</i>       | chr19 | 46833234 | G   | A     | --          | --          | Intron  | SNP | 0.143 | 18 | 3  |
| --                 | chr19 | 46964506 | T   | A     | --          | --          | IGR     | SNP | 0.261 | 34 | 12 |
| <i>LOC10050601</i> | chr19 | 47048733 | G   | A     | --          | --          | Intron  | SNP | 0.143 | 24 | 4  |
| <i>LOC10050601</i> | chr19 | 47048735 | G   | A     | --          | --          | Intron  | SNP | 0.133 | 26 | 4  |
| --                 | chr19 | 47269541 | T   | A     | --          | --          | IGR     | SNP | 0.375 | 5  | 3  |
| --                 | chr19 | 47300565 | -   | CAAAT | --          | --          | IGR     | INS | 0.211 | 14 | 4  |
| --                 | chr19 | 47520139 | AAG | -     | --          | --          | IGR     | DEL | 0.111 | 40 | 5  |
| <i>SAE1</i>        | chr19 | 47673995 | C   | T     | --          | --          | Intron  | SNP | 0.500 | 24 | 24 |
| --                 | chr19 | 47744794 | C   | A     | --          | --          | IGR     | SNP | 0.500 | 60 | 60 |
| --                 | chr19 | 47847487 | C   | A     | --          | --          | IGR     | SNP | 0.185 | 44 | 10 |
| <i>PLA2G4C</i>     | chr19 | 48565811 | G   | A     | --          | --          | Intron  | SNP | 0.421 | 44 | 32 |
| <i>TMEM143</i>     | chr19 | 48835279 | A   | C     | --          | --          | 3'Flank | SNP | 0.408 | 42 | 29 |
| <i>FUT2</i>        | chr19 | 49203588 | -   | TA    | --          | --          | Intron  | INS | 0.227 | 16 | 5  |
| <i>BCAT2</i>       | chr19 | 49305723 | G   | T     | --          | --          | Intron  | SNP | 0.190 | 17 | 4  |
| <i>HSD17B14</i>    | chr19 | 49338067 | G   | A     | --          | --          | Intron  | SNP | 0.140 | 37 | 6  |
| <i>PLEKHA4</i>     | chr19 | 49349267 | C   | A     | --          | --          | Intron  | SNP | 0.400 | 6  | 4  |
| --                 | chr19 | 49434628 | A   | C     | --          | --          | IGR     | SNP | 0.109 | 41 | 5  |
| <i>RUVBL2</i>      | chr19 | 49513290 | A   | T     | A630T       | T210T       | Silent  | SNP | 0.229 | 54 | 16 |
| --                 | chr19 | 49615253 | G   | A     | --          | --          | IGR     | SNP | 0.481 | 14 | 13 |
| <i>PPFIA3</i>      | chr19 | 49652540 | C   | T     | C3312T      | F1104F      | Silent  | SNP | 0.534 | 27 | 31 |
| <i>TRPM4</i>       | chr19 | 49660178 | T   | C     | --          | --          | 5'Flank | SNP | 0.130 | 20 | 3  |
| <i>TRPM4</i>       | chr19 | 49670703 | T   | C     | --          | --          | Intron  | SNP | 0.571 | 3  | 4  |
| <i>TEAD2</i>       | chr19 | 49850170 | C   | A     | --          | --          | Intron  | SNP | 0.210 | 49 | 13 |
| <i>SCAF1</i>       | chr19 | 50144433 | A   | T     | --          | --          | 5'Flank | SNP | 0.179 | 46 | 10 |
| <i>CPT1C</i>       | chr19 | 50208473 | T   | A     | T849A,T882A | T283T,T294T | Silent  | SNP | 0.167 | 55 | 11 |
| <i>MED25</i>       | chr19 | 50330084 | G   | T     | --          | --          | Intron  | SNP | 0.447 | 47 | 38 |
| <i>PTOV1</i>       | chr19 | 50363873 | G   | A     | --          | --          | 3'UTR   | SNP | 0.375 | 30 | 18 |
| --                 | chr19 | 50598873 | G   | -     | TTTAA       | --          | IGR     | DEL | 0.222 | 14 | 4  |
| --                 | chr19 | 50679779 | G   | A     | --          | --          | IGR     | SNP | 0.261 | 17 | 6  |
| --                 | chr19 | 51088481 | A   | C     | --          | --          | IGR     | SNP | 0.196 | 37 | 9  |
| --                 | chr19 | 51233578 | CAT | -     | --          | --          | IGR     | DEL | 0.130 | 19 | 3  |
| --                 | chr19 | 51336710 | C   | T     | --          | --          | IGR     | SNP | 0.323 | 42 | 20 |
| --                 | chr19 | 51416978 | -   | GTC   | --          | --          | IGR     | INS | 0.117 | 53 | 7  |
| --                 | chr19 | 51726270 | G   | T     | --          | --          | IGR     | SNP | 0.527 | 35 | 39 |
| <i>IGLON5</i>      | chr19 | 51814591 | A   | G     | --          | --          | 5'Flank | SNP | 0.167 | 15 | 3  |
| --                 | chr19 | 51881633 | G   | A     | --          | --          | IGR     | SNP | 0.244 | 34 | 11 |

|              |       |          |       |    |        |       |                 |     |       |    |    |
|--------------|-------|----------|-------|----|--------|-------|-----------------|-----|-------|----|----|
| --           | chr19 | 52113776 | A     | T  | --     | --    | IGR             | SNP | 0.171 | 34 | 7  |
| LINC00085    | chr19 | 52201797 | C     | T  | --     | --    | RNA             | SNP | 0.463 | 36 | 31 |
| FPR3         | chr19 | 52309037 | G     | T  | --     | --    | Intron          | SNP | 0.390 | 25 | 16 |
| --           | chr19 | 52415929 | G     | T  | --     | --    | IGR             | SNP | 0.216 | 40 | 11 |
| --           | chr19 | 52493277 | G     | A  | --     | --    | IGR             | SNP | 0.231 | 10 | 3  |
| --           | chr19 | 52493278 | C     | A  | --     | --    | IGR             | SNP | 0.200 | 12 | 3  |
| ZNF615       | chr19 | 52509447 | A     | G  | --     | --    | Intron          | SNP | 0.191 | 38 | 9  |
| PPP2R1A      | chr19 | 52715873 | G     | T  | --     | --    | Intron          | SNP | 0.250 | 60 | 20 |
| --           | chr19 | 52751382 | G     | T  | --     | --    | IGR             | SNP | 0.127 | 62 | 9  |
| --           | chr19 | 52926782 | C     | T  | --     | --    | IGR             | SNP | 0.415 | 24 | 17 |
| ZNF808       | chr19 | 53049647 | C     | G  | --     | --    | Intron          | SNP | 0.408 | 29 | 20 |
| ZNF701       | chr19 | 53082177 | A     | T  | --     | --    | Intron          | SNP | 0.256 | 29 | 10 |
| ZNF83        | chr19 | 53167615 | TG    | -  | --     | --    | Intron          | DEL | 0.311 | 31 | 14 |
| ZNF611       | chr19 | 53230557 | T     | A  | --     | --    | Intron          | SNP | 0.511 | 23 | 24 |
| ZNF320       | chr19 | 53379026 | C     | G  | --     | --    | 3'Flank         | SNP | 0.333 | 24 | 12 |
| --           | chr19 | 53499147 | T     | A  | --     | --    | IGR             | SNP | 0.259 | 40 | 14 |
| ZNF813       | chr19 | 53973815 | TC    | -  | --     | --    | Intron          | DEL | 0.300 | 21 | 9  |
| ZNF813       | chr19 | 53973832 | TAA   | -  | --     | --    | Intron          | DEL | 0.281 | 23 | 9  |
| ZNF813       | chr19 | 53990041 | G     | A  | --     | --    | Intron          | SNP | 0.127 | 55 | 8  |
| MIR515-1,MIF | chr19 | 54187325 | C     | G  | --     | --    | 5'Flank         | SNP | 0.125 | 42 | 6  |
| MIR520C      | chr19 | 54210959 | A     | G  | --     | --    | 3'Flank         | SNP | 0.125 | 42 | 6  |
| MIR516A2     | chr19 | 54263446 | ATG   | -  | --     | --    | 5'Flank         | DEL | 0.119 | 37 | 5  |
| --           | chr19 | 54284449 | G     | A  | --     | --    | IGR             | SNP | 0.326 | 29 | 14 |
| MYADM        | chr19 | 54377236 | C     | T  | C453T  | Y151Y | Silent          | SNP | 0.207 | 69 | 18 |
| PRKCG        | chr19 | 54400591 | G     | T  | --     | --    | Intron          | SNP | 0.429 | 28 | 21 |
| CACNG7       | chr19 | 54423599 | G     | C  | --     | --    | Intron          | SNP | 0.125 | 21 | 3  |
| CACNG7       | chr19 | 54426944 | C     | T  | --     | --    | Intron          | SNP | 0.122 | 36 | 5  |
| --           | chr19 | 54728550 | GC    | -  | --     | --    | IGR             | DEL | 0.143 | 18 | 3  |
| --           | chr19 | 54834477 | G     | A  | --     | --    | IGR             | SNP | 0.167 | 30 | 6  |
| --           | chr19 | 54923523 | C     | T  | --     | --    | IGR             | SNP | 0.259 | 20 | 7  |
| --           | chr19 | 55060500 | C     | T  | --     | --    | IGR             | SNP | 0.148 | 69 | 12 |
| --           | chr19 | 55152883 | G     | A  | --     | --    | IGR             | SNP | 0.478 | 35 | 32 |
| KIR2DL3      | chr19 | 55256505 | -     | TC | --     | --    | Intron          | INS | 0.200 | 52 | 13 |
| KIR2DL3      | chr19 | 55256543 | T     | C  | --     | --    | Intron          | SNP | 0.178 | 37 | 8  |
| KIR2DL3      | chr19 | 55256914 | A     | C  | --     | --    | Intron          | SNP | 0.105 | 34 | 4  |
| KIR2DL3      | chr19 | 55265330 | G     | A  | --     | --    | 3'Flank         | SNP | 0.118 | 30 | 4  |
| --           | chr19 | 55275620 | A     | G  | --     | --    | IGR             | SNP | 0.108 | 33 | 4  |
| --           | chr19 | 55275629 | G     | C  | --     | --    | IGR             | SNP | 0.100 | 36 | 4  |
| KIR2DS4      | chr19 | 55357635 | A     | C  | --     | --    | Intron          | SNP | 0.125 | 35 | 5  |
| KIR2DS4      | chr19 | 55357636 | A     | C  | --     | --    | Intron          | SNP | 0.125 | 35 | 5  |
| KIR2DS4      | chr19 | 55358365 | G     | C  | --     | --    | Intron          | SNP | 0.150 | 34 | 6  |
| --           | chr19 | 55410275 | G     | A  | --     | --    | IGR             | SNP | 0.125 | 35 | 5  |
| NLRP2        | chr19 | 55482062 | A     | C  | --     | --    | Intron          | SNP | 0.240 | 19 | 6  |
| FAM71E2      | chr19 | 55872744 | C     | A  | --     | --    | Intron          | SNP | 0.203 | 47 | 12 |
| SBK2         | chr19 | 56043986 | A     | T  | --     | --    | Intron          | SNP | 0.250 | 9  | 3  |
| ZNF865       | chr19 | 56127284 | T     | G  | T2300G | V767G | Missense_mutati | SNP | 0.300 | 14 | 6  |
| U2AF2        | chr19 | 56179021 | T     | C  | --     | --    | Intron          | SNP | 0.457 | 44 | 37 |
| --           | chr19 | 56591468 | T     | G  | --     | --    | IGR             | SNP | 0.143 | 42 | 7  |
| --           | chr19 | 56594697 | C     | G  | --     | --    | IGR             | SNP | 0.164 | 51 | 10 |
| --           | chr19 | 56645423 | C     | A  | --     | --    | IGR             | SNP | 0.302 | 37 | 16 |
| GALP         | chr19 | 56687962 | T     | C  | --     | --    | Intron          | SNP | 0.180 | 50 | 11 |
| GALP         | chr19 | 56687977 | C     | G  | --     | --    | Intron          | SNP | 0.121 | 51 | 7  |
| --           | chr19 | 56786929 | T     | C  | --     | --    | IGR             | SNP | 0.102 | 44 | 5  |
| ZNF583       | chr19 | 56918002 | C     | T  | --     | --    | Intron          | SNP | 0.129 | 27 | 4  |
| ZNF583       | chr19 | 56931285 | C     | T  | --     | --    | Intron          | SNP | 0.200 | 28 | 7  |
| ZNF667       | chr19 | 56956120 | TA    | -  | --     | --    | Intron          | DEL | 0.143 | 12 | 2  |
| --           | chr19 | 57234149 | T     | A  | --     | --    | IGR             | SNP | 0.323 | 42 | 20 |
| --           | chr19 | 57249155 | T     | C  | --     | --    | IGR             | SNP | 0.263 | 28 | 10 |
| --           | chr19 | 57256627 | -     | AC | --     | --    | IGR             | INS | 0.118 | 15 | 2  |
| ZIM2         | chr19 | 57289692 | A     | G  | --     | --    | Intron          | SNP | 0.418 | 32 | 23 |
| ZIM2         | chr19 | 57303898 | C     | A  | --     | --    | Intron          | SNP | 0.222 | 14 | 4  |
| PEG3,ZIM2    | chr19 | 57336448 | G     | C  | --     | --    | Intron          | SNP | 0.405 | 25 | 17 |
| --           | chr19 | 57450884 | G     | A  | --     | --    | IGR             | SNP | 0.216 | 40 | 11 |
| --           | chr19 | 57470527 | G     | T  | --     | --    | IGR             | SNP | 0.254 | 44 | 15 |
| --           | chr19 | 57478246 | G     | T  | --     | --    | IGR             | SNP | 0.218 | 61 | 17 |
| --           | chr19 | 57501484 | G     | C  | --     | --    | IGR             | SNP | 0.395 | 26 | 17 |
| --           | chr19 | 57603823 | CATAA | -  | --     | --    | IGR             | DEL | 0.400 | 8  | 6  |
| --           | chr19 | 57976991 | G     | C  | --     | --    | IGR             | SNP | 0.500 | 23 | 23 |
| --           | chr19 | 58334330 | C     | T  | --     | --    | IGR             | SNP | 0.277 | 34 | 13 |
| ZNF256       | chr19 | 58459606 | C     | A  | --     | --    | 5'Flank         | SNP | 0.250 | 12 | 4  |
| ZNF329       | chr19 | 58659372 | C     | T  | --     | --    | Intron          | SNP | 0.317 | 28 | 13 |
| --           | chr19 | 59051577 | G     | T  | --     | --    | IGR             | SNP | 0.128 | 41 | 6  |
| --           | chr20 | 173594   | G     | C  | --     | --    | IGR             | SNP | 0.114 | 62 | 8  |
| CSNK2A1      | chr20 | 464177   | C     | G  | --     | --    | 3'UTR           | SNP | 0.357 | 36 | 20 |
| SCRT2        | chr20 | 641842   | G     | T  | --     | --    | 3'Flank         | SNP | 0.148 | 75 | 13 |
| SCRT2        | chr20 | 644683   | G     | A  | C556T  | R186C | Missense_mutati | SNP | 0.186 | 70 | 16 |
| --           | chr20 | 723974   | T     | A  | --     | --    | IGR             | SNP | 0.153 | 72 | 13 |
| PSMF1        | chr20 | 1095292  | C     | G  | --     | --    | Intron          | SNP | 0.151 | 45 | 8  |
| --           | chr20 | 1239230  | G     | A  | --     | --    | IGR             | SNP | 0.163 | 77 | 15 |
| --           | chr20 | 1239293  | A     | G  | --     | --    | IGR             | SNP | 0.250 | 54 | 18 |



|                    |       |          |     |   |       |      |        |     |       |    |    |
|--------------------|-------|----------|-----|---|-------|------|--------|-----|-------|----|----|
| <i>SNPH</i>        | chr20 | 1269201  | G   | C | --    | --   | Intron | SNP | 0.382 | 42 | 26 |
| <i>SIRPB1</i>      | chr20 | 1586415  | G   | A | --    | --   | Intron | SNP | 0.184 | 31 | 7  |
| --                 | chr20 | 1820342  | G   | A | --    | --   | Intron | SNP | 0.226 | 24 | 7  |
| <i>SIRPA</i>       | chr20 | 1891216  | GC  | - | --    | --   | Intron | DEL | 0.344 | 42 | 22 |
| --                 | chr20 | 2042248  | T   | C | --    | --   | IGR    | SNP | 0.169 | 54 | 11 |
| --                 | chr20 | 2228048  | C   | T | --    | --   | IGR    | SNP | 0.211 | 56 | 15 |
| --                 | chr20 | 2248639  | G   | A | --    | --   | IGR    | SNP | 0.250 | 9  | 3  |
| <i>TMC2</i>        | chr20 | 2592810  | A   | C | --    | --   | Intron | SNP | 0.130 | 60 | 9  |
| --                 | chr20 | 2789179  | A   | T | --    | --   | IGR    | SNP | 0.211 | 15 | 4  |
| <i>PTPRA</i>       | chr20 | 2850624  | AAT | - | --    | --   | Intron | DEL | 0.125 | 28 | 4  |
| <i>PTPRA</i>       | chr20 | 2927508  | T   | A | --    | --   | Intron | SNP | 0.192 | 21 | 5  |
| <i>PTPRA</i>       | chr20 | 2970564  | G   | A | --    | --   | Intron | SNP | 0.338 | 47 | 24 |
| <i>PTPRA</i>       | chr20 | 2987633  | T   | G | --    | --   | Intron | SNP | 0.187 | 61 | 14 |
| --                 | chr20 | 3032898  | G   | A | --    | --   | IGR    | SNP | 0.164 | 46 | 9  |
| <i>C20orf194</i>   | chr20 | 3361729  | G   | A | --    | --   | Intron | SNP | 0.575 | 31 | 42 |
| <i>ATRN</i>        | chr20 | 3581802  | A   | T | --    | --   | Intron | SNP | 0.115 | 54 | 7  |
| <i>ATRN</i>        | chr20 | 3587710  | T   | G | --    | --   | Intron | SNP | 0.131 | 53 | 8  |
| --                 | chr20 | 3814956  | C   | G | --    | --   | IGR    | SNP | 0.145 | 47 | 8  |
| --                 | chr20 | 3863142  | G   | A | --    | --   | IGR    | SNP | 0.100 | 36 | 4  |
| --                 | chr20 | 4087441  | C   | G | --    | --   | IGR    | SNP | 0.385 | 24 | 15 |
| <i>ADRA1D</i>      | chr20 | 4210194  | G   | T | --    | --   | Intron | SNP | 0.205 | 66 | 17 |
| --                 | chr20 | 4316470  | GC  | - | --    | --   | IGR    | DEL | 0.149 | 57 | 10 |
| --                 | chr20 | 4607914  | C   | A | --    | --   | IGR    | SNP | 0.162 | 31 | 6  |
| <i>SLC23A2</i>     | chr20 | 4941749  | C   | T | --    | --   | Intron | SNP | 0.229 | 27 | 8  |
| --                 | chr20 | 5006701  | T   | C | --    | --   | IGR    | SNP | 0.154 | 22 | 4  |
| <i>PROKR2</i>      | chr20 | 5294755  | G   | A | C261T | L87L | Silent | SNP | 0.575 | 45 | 61 |
| --                 | chr20 | 5359549  | G   | A | --    | --   | IGR    | SNP | 0.429 | 32 | 24 |
| --                 | chr20 | 5386485  | G   | A | --    | --   | IGR    | SNP | 0.193 | 71 | 17 |
| <i>LOC149837</i>   | chr20 | 5483826  | G   | A | --    | --   | RNA    | SNP | 0.148 | 23 | 4  |
| --                 | chr20 | 5518632  | G   | A | --    | --   | IGR    | SNP | 0.106 | 76 | 9  |
| --                 | chr20 | 5617821  | G   | T | --    | --   | IGR    | SNP | 0.308 | 9  | 4  |
| <i>C20orf196</i>   | chr20 | 5753171  | C   | T | --    | --   | Intron | SNP | 0.181 | 59 | 13 |
| <i>C20orf196</i>   | chr20 | 5779704  | C   | A | --    | --   | Intron | SNP | 0.136 | 38 | 6  |
| --                 | chr20 | 6259199  | G   | T | --    | --   | IGR    | SNP | 0.222 | 14 | 4  |
| --                 | chr20 | 6300479  | AT  | - | --    | --   | IGR    | DEL | 0.167 | 15 | 3  |
| --                 | chr20 | 6422232  | T   | G | --    | --   | IGR    | SNP | 0.130 | 40 | 6  |
| --                 | chr20 | 6460947  | T   | A | --    | --   | IGR    | SNP | 0.315 | 37 | 17 |
| --                 | chr20 | 6560267  | T   | G | --    | --   | IGR    | SNP | 0.243 | 87 | 28 |
| --                 | chr20 | 6716295  | T   | C | --    | --   | IGR    | SNP | 0.481 | 42 | 39 |
| --                 | chr20 | 6822001  | A   | G | --    | --   | IGR    | SNP | 0.120 | 22 | 3  |
| --                 | chr20 | 7039961  | T   | C | --    | --   | IGR    | SNP | 0.215 | 62 | 17 |
| --                 | chr20 | 7255150  | C   | G | --    | --   | IGR    | SNP | 0.449 | 43 | 35 |
| --                 | chr20 | 7272645  | TA  | - | --    | --   | IGR    | DEL | 0.533 | 21 | 24 |
| --                 | chr20 | 7272971  | C   | G | --    | --   | IGR    | SNP | 0.387 | 46 | 29 |
| --                 | chr20 | 7280972  | C   | A | --    | --   | IGR    | SNP | 0.145 | 53 | 9  |
| --                 | chr20 | 7281553  | G   | C | --    | --   | IGR    | SNP | 0.471 | 18 | 16 |
| --                 | chr20 | 7349238  | A   | G | --    | --   | IGR    | SNP | 0.176 | 28 | 6  |
| --                 | chr20 | 7409099  | C   | G | --    | --   | IGR    | SNP | 0.167 | 45 | 9  |
| --                 | chr20 | 7409120  | C   | G | --    | --   | IGR    | SNP | 0.179 | 46 | 10 |
| --                 | chr20 | 7448338  | G   | T | --    | --   | IGR    | SNP | 0.370 | 29 | 17 |
| --                 | chr20 | 7477482  | T   | G | --    | --   | IGR    | SNP | 0.333 | 38 | 19 |
| --                 | chr20 | 7850093  | G   | A | --    | --   | IGR    | SNP | 0.169 | 59 | 12 |
| <i>TMX4</i>        | chr20 | 7996638  | A   | G | --    | --   | Intron | SNP | 0.304 | 55 | 24 |
| <i>PLCB1</i>       | chr20 | 8565341  | T   | C | --    | --   | Intron | SNP | 0.186 | 48 | 11 |
| <i>PLCB1</i>       | chr20 | 8691177  | C   | T | --    | --   | Intron | SNP | 0.120 | 22 | 3  |
| <i>PLCB1</i>       | chr20 | 8721329  | T   | C | --    | --   | Intron | SNP | 0.471 | 36 | 32 |
| <i>PLCB4</i>       | chr20 | 9094378  | G   | A | --    | --   | Intron | SNP | 0.192 | 59 | 14 |
| <i>PLCB4</i>       | chr20 | 9136744  | C   | T | --    | --   | Intron | SNP | 0.500 | 36 | 36 |
| <i>PLCB4</i>       | chr20 | 9170083  | T   | C | --    | --   | Intron | SNP | 0.185 | 22 | 5  |
| <i>PLCB4</i>       | chr20 | 9184458  | C   | T | --    | --   | Intron | SNP | 0.167 | 15 | 3  |
| <i>PLCB4</i>       | chr20 | 9337048  | A   | G | --    | --   | Intron | SNP | 0.151 | 45 | 8  |
| <i>PLCB4</i>       | chr20 | 9453111  | C   | A | --    | --   | Intron | SNP | 0.107 | 50 | 6  |
| --                 | chr20 | 9493752  | A   | T | --    | --   | IGR    | SNP | 0.194 | 25 | 6  |
| <i>PAK7</i>        | chr20 | 9573348  | C   | T | --    | --   | Intron | SNP | 0.400 | 48 | 32 |
| --                 | chr20 | 9827505  | T   | G | --    | --   | IGR    | SNP | 0.121 | 29 | 4  |
| <i>LOC1001312C</i> | chr20 | 10157224 | A   | T | --    | --   | RNA    | SNP | 0.169 | 59 | 12 |
| <i>LOC1001312C</i> | chr20 | 10179343 | C   | T | --    | --   | RNA    | SNP | 0.211 | 56 | 15 |
| --                 | chr20 | 10665943 | A   | T | --    | --   | IGR    | SNP | 0.100 | 63 | 7  |
| --                 | chr20 | 11042276 | A   | T | --    | --   | IGR    | SNP | 0.387 | 38 | 24 |
| --                 | chr20 | 11165981 | C   | G | --    | --   | IGR    | SNP | 0.354 | 42 | 23 |
| --                 | chr20 | 11675357 | CAG | - | --    | --   | IGR    | DEL | 0.194 | 54 | 13 |
| --                 | chr20 | 11804606 | G   | A | --    | --   | IGR    | SNP | 0.341 | 29 | 15 |
| --                 | chr20 | 11839141 | C   | G | --    | --   | IGR    | SNP | 0.171 | 34 | 7  |
| --                 | chr20 | 12055312 | C   | T | --    | --   | IGR    | SNP | 0.198 | 65 | 16 |
| --                 | chr20 | 12095747 | G   | C | --    | --   | IGR    | SNP | 0.276 | 55 | 21 |
| --                 | chr20 | 12324879 | G   | T | --    | --   | IGR    | SNP | 0.133 | 26 | 4  |
| --                 | chr20 | 12564352 | A   | G | --    | --   | IGR    | SNP | 0.214 | 22 | 6  |
| --                 | chr20 | 12734307 | G   | C | --    | --   | IGR    | SNP | 0.543 | 32 | 38 |
| --                 | chr20 | 12938560 | A   | T | --    | --   | IGR    | SNP | 0.169 | 69 | 14 |
| <i>SPTLC3</i>      | chr20 | 12992054 | A   | C | --    | --   | Intron | SNP | 0.489 | 47 | 45 |

|             |       |          |     |    |    |    |        |     |       |    |    |
|-------------|-------|----------|-----|----|----|----|--------|-----|-------|----|----|
| LOC1005055: | chr20 | 13218575 | G   | A  | -- | -- | RNA    | SNP | 0.190 | 47 | 11 |
| ISM1        | chr20 | 13226267 | A   | T  | -- | -- | Intron | SNP | 0.193 | 71 | 17 |
| ISM1        | chr20 | 13232486 | T   | C  | -- | -- | Intron | SNP | 0.138 | 50 | 8  |
| TASP1       | chr20 | 13491934 | A   | C  | -- | -- | Intron | SNP | 0.400 | 33 | 22 |
| MACROD2     | chr20 | 14090660 | A   | C  | -- | -- | Intron | SNP | 0.206 | 54 | 14 |
| MACROD2     | chr20 | 14432039 | G   | A  | -- | -- | Intron | SNP | 0.623 | 29 | 48 |
| MACROD2     | chr20 | 14669430 | C   | T  | -- | -- | Intron | SNP | 0.161 | 47 | 9  |
| MACROD2     | chr20 | 14920823 | T   | A  | -- | -- | Intron | SNP | 0.167 | 20 | 4  |
| MACROD2     | chr20 | 14971155 | C   | T  | -- | -- | Intron | SNP | 0.222 | 28 | 8  |
| MACROD2     | chr20 | 14985498 | T   | C  | -- | -- | Intron | SNP | 0.300 | 42 | 18 |
| MACROD2     | chr20 | 15150904 | A   | C  | -- | -- | Intron | SNP | 0.228 | 44 | 13 |
| MACROD2     | chr20 | 15255782 | C   | A  | -- | -- | Intron | SNP | 0.158 | 48 | 9  |
| MACROD2     | chr20 | 15466568 | C   | A  | -- | -- | Intron | SNP | 0.182 | 63 | 14 |
| MACROD2     | chr20 | 15518281 | G   | T  | -- | -- | Intron | SNP | 0.405 | 25 | 17 |
| MACROD2     | chr20 | 15541437 | G   | A  | -- | -- | Intron | SNP | 0.130 | 20 | 3  |
| MACROD2     | chr20 | 15572787 | G   | A  | -- | -- | Intron | SNP | 0.591 | 36 | 52 |
| MACROD2     | chr20 | 15591635 | T   | A  | -- | -- | Intron | SNP | 0.103 | 35 | 4  |
| MACROD2     | chr20 | 15871436 | G   | A  | -- | -- | Intron | SNP | 0.396 | 32 | 21 |
| MACROD2     | chr20 | 15984168 | G   | C  | -- | -- | Intron | SNP | 0.278 | 52 | 20 |
| --          | chr20 | 16036829 | CTT | -  | -- | -- | IGR    | DEL | 0.129 | 27 | 4  |
| --          | chr20 | 16150875 | G   | C  | -- | -- | IGR    | SNP | 0.167 | 50 | 10 |
| KIF16B      | chr20 | 16370934 | T   | A  | -- | -- | Intron | SNP | 0.114 | 31 | 4  |
| KIF16B      | chr20 | 16441680 | A   | C  | -- | -- | Intron | SNP | 0.143 | 36 | 6  |
| --          | chr20 | 16600623 | A   | G  | -- | -- | IGR    | SNP | 0.188 | 56 | 13 |
| --          | chr20 | 16758635 | G   | C  | -- | -- | IGR    | SNP | 0.138 | 50 | 8  |
| --          | chr20 | 16758636 | A   | T  | -- | -- | IGR    | SNP | 0.155 | 49 | 9  |
| --          | chr20 | 16889803 | G   | A  | -- | -- | IGR    | SNP | 0.100 | 27 | 3  |
| --          | chr20 | 17008836 | G   | T  | -- | -- | IGR    | SNP | 0.164 | 56 | 11 |
| --          | chr20 | 17101424 | C   | T  | -- | -- | IGR    | SNP | 0.128 | 34 | 5  |
| PCSK2       | chr20 | 17237689 | C   | A  | -- | -- | Intron | SNP | 0.116 | 61 | 8  |
| RRBP1       | chr20 | 17657730 | T   | A  | -- | -- | Intron | SNP | 0.143 | 36 | 6  |
| --          | chr20 | 17822451 | C   | G  | -- | -- | IGR    | SNP | 0.127 | 55 | 8  |
| --          | chr20 | 18106527 | G   | T  | -- | -- | IGR    | SNP | 0.206 | 27 | 7  |
| --          | chr20 | 18242365 | G   | A  | -- | -- | IGR    | SNP | 0.133 | 26 | 4  |
| ZNF133      | chr20 | 18289575 | G   | A  | -- | -- | Intron | SNP | 0.107 | 67 | 8  |
| --          | chr20 | 18356537 | G   | A  | -- | -- | IGR    | SNP | 0.146 | 35 | 6  |
| --          | chr20 | 18356577 | T   | C  | -- | -- | IGR    | SNP | 0.119 | 37 | 5  |
| C20orf12    | chr20 | 18390699 | G   | A  | -- | -- | Intron | SNP | 0.280 | 18 | 7  |
| SEC23B      | chr20 | 18520597 | C   | G  | -- | -- | Intron | SNP | 0.175 | 52 | 11 |
| --          | chr20 | 18546637 | T   | G  | -- | -- | IGR    | SNP | 0.222 | 49 | 14 |
| DTD1        | chr20 | 18619204 | A   | G  | -- | -- | Intron | SNP | 0.121 | 58 | 8  |
| DTD1        | chr20 | 18619205 | G   | T  | -- | -- | Intron | SNP | 0.123 | 57 | 8  |
| DTD1        | chr20 | 18642034 | G   | T  | -- | -- | Intron | SNP | 0.133 | 26 | 4  |
| --          | chr20 | 18879062 | C   | G  | -- | -- | IGR    | SNP | 0.255 | 38 | 13 |
| --          | chr20 | 18888154 | A   | C  | -- | -- | IGR    | SNP | 0.355 | 40 | 22 |
| --          | chr20 | 19112928 | TA  | -  | -- | -- | IGR    | DEL | 0.107 | 25 | 3  |
| --          | chr20 | 19133517 | G   | A  | -- | -- | IGR    | SNP | 0.213 | 48 | 13 |
| LOC1001302: | chr20 | 19252705 | C   | A  | -- | -- | RNA    | SNP | 0.255 | 35 | 12 |
| SLC24A3     | chr20 | 19460080 | C   | T  | -- | -- | Intron | SNP | 0.500 | 35 | 35 |
| SLC24A3     | chr20 | 19589339 | G   | A  | -- | -- | Intron | SNP | 0.203 | 47 | 12 |
| SLC24A3     | chr20 | 19613058 | C   | A  | -- | -- | Intron | SNP | 0.278 | 57 | 22 |
| SLC24A3     | chr20 | 19684357 | G   | A  | -- | -- | Intron | SNP | 0.145 | 47 | 8  |
| --          | chr20 | 19845295 | A   | T  | -- | -- | IGR    | SNP | 0.183 | 49 | 11 |
| --          | chr20 | 19850281 | T   | A  | -- | -- | IGR    | SNP | 0.250 | 21 | 7  |
| RIN2        | chr20 | 19919047 | -   | TG | -- | -- | Intron | INS | 0.109 | 49 | 6  |
| C20orf26    | chr20 | 20155968 | T   | G  | -- | -- | Intron | SNP | 0.141 | 61 | 10 |
| C20orf26    | chr20 | 20319526 | G   | T  | -- | -- | Intron | SNP | 0.350 | 52 | 28 |
| C20orf26    | chr20 | 20336135 | G   | A  | -- | -- | Intron | SNP | 0.286 | 35 | 14 |
| C20orf26    | chr20 | 20337551 | A   | G  | -- | -- | Intron | SNP | 0.238 | 16 | 5  |
| --          | chr20 | 20365001 | C   | A  | -- | -- | IGR    | SNP | 0.537 | 31 | 36 |
| --          | chr20 | 20781592 | C   | T  | -- | -- | IGR    | SNP | 0.329 | 57 | 28 |
| --          | chr20 | 21401290 | C   | G  | -- | -- | IGR    | SNP | 0.370 | 46 | 27 |
| --          | chr20 | 21556314 | C   | T  | -- | -- | IGR    | SNP | 0.357 | 45 | 25 |
| --          | chr20 | 21639215 | G   | C  | -- | -- | IGR    | SNP | 0.161 | 52 | 10 |
| --          | chr20 | 21733760 | T   | A  | -- | -- | IGR    | SNP | 0.107 | 50 | 6  |
| --          | chr20 | 21817860 | G   | C  | -- | -- | IGR    | SNP | 0.544 | 36 | 43 |
| --          | chr20 | 21824965 | G   | T  | -- | -- | IGR    | SNP | 0.559 | 26 | 33 |
| --          | chr20 | 21991818 | A   | G  | -- | -- | IGR    | SNP | 0.136 | 19 | 3  |
| --          | chr20 | 21996975 | G   | C  | -- | -- | IGR    | SNP | 0.533 | 28 | 32 |
| --          | chr20 | 22063397 | A   | T  | -- | -- | IGR    | SNP | 0.200 | 24 | 6  |
| --          | chr20 | 22077977 | A   | T  | -- | -- | IGR    | SNP | 0.517 | 14 | 15 |
| --          | chr20 | 22133955 | T   | A  | -- | -- | IGR    | SNP | 0.224 | 45 | 13 |
| --          | chr20 | 22196599 | T   | G  | -- | -- | IGR    | SNP | 0.121 | 51 | 7  |
| --          | chr20 | 22214928 | G   | C  | -- | -- | IGR    | SNP | 0.288 | 47 | 19 |
| --          | chr20 | 22405319 | T   | G  | -- | -- | IGR    | SNP | 0.135 | 77 | 12 |
| --          | chr20 | 22492395 | A   | T  | -- | -- | IGR    | SNP | 0.141 | 55 | 9  |
| --          | chr20 | 22534655 | G   | A  | -- | -- | IGR    | SNP | 0.484 | 32 | 30 |
| --          | chr20 | 22539624 | G   | A  | -- | -- | IGR    | SNP | 0.182 | 45 | 10 |
| --          | chr20 | 22710828 | A   | C  | -- | -- | IGR    | SNP | 0.159 | 58 | 11 |
| --          | chr20 | 22823261 | A   | G  | -- | -- | IGR    | SNP | 0.197 | 53 | 13 |

|                     |       |          |   |    |             |             |         |     |       |    |    |
|---------------------|-------|----------|---|----|-------------|-------------|---------|-----|-------|----|----|
| --                  | chr20 | 22875573 | C | A  | --          | --          | IGR     | SNP | 0.100 | 63 | 7  |
| --                  | chr20 | 23042011 | C | T  | --          | --          | IGR     | SNP | 0.396 | 32 | 21 |
| <i>NXT1</i>         | chr20 | 23335695 | G | T  | --          | --          | 3'Flank | SNP | 0.115 | 46 | 6  |
| <i>CSTT</i>         | chr20 | 23519021 | C | T  | --          | --          | RNA     | SNP | 0.121 | 29 | 4  |
| --                  | chr20 | 23527499 | G | A  | --          | --          | IGR     | SNP | 0.507 | 36 | 37 |
| <i>CST3</i>         | chr20 | 23619338 | A | C  | --          | --          | 5'Flank | SNP | 0.208 | 19 | 5  |
| <i>CST1</i>         | chr20 | 23730231 | T | C  | --          | --          | Intron  | SNP | 0.305 | 41 | 18 |
| --                  | chr20 | 23794342 | T | C  | --          | --          | IGR     | SNP | 0.250 | 39 | 13 |
| --                  | chr20 | 23829848 | A | C  | --          | --          | IGR     | SNP | 0.207 | 23 | 6  |
| --                  | chr20 | 23870068 | C | T  | --          | --          | IGR     | SNP | 0.370 | 46 | 27 |
| --                  | chr20 | 23879762 | C | T  | --          | --          | IGR     | SNP | 0.158 | 16 | 3  |
| <i>GGTLC1</i>       | chr20 | 23968833 | A | G  | --          | --          | Intron  | SNP | 0.115 | 23 | 3  |
| <i>GGTLC1</i>       | chr20 | 23970205 | C | T  | --          | --          | 5'Flank | SNP | 0.170 | 39 | 8  |
| --                  | chr20 | 24111815 | C | A  | --          | --          | IGR     | SNP | 0.400 | 42 | 28 |
| --                  | chr20 | 24115392 | G | C  | --          | --          | IGR     | SNP | 0.153 | 61 | 11 |
| --                  | chr20 | 24263069 | C | T  | --          | --          | IGR     | SNP | 0.145 | 53 | 9  |
| --                  | chr20 | 24269009 | G | T  | --          | --          | IGR     | SNP | 0.155 | 71 | 13 |
| --                  | chr20 | 24328168 | G | A  | --          | --          | IGR     | SNP | 0.186 | 35 | 8  |
| <i>SYNDIG1</i>      | chr20 | 24500821 | A | T  | --          | --          | Intron  | SNP | 0.207 | 23 | 6  |
| <i>SYNDIG1</i>      | chr20 | 24583372 | T | A  | --          | --          | Intron  | SNP | 0.125 | 56 | 8  |
| <i>SYNDIG1</i>      | chr20 | 24593057 | C | A  | --          | --          | Intron  | SNP | 0.194 | 50 | 12 |
| --                  | chr20 | 25089866 | T | G  | --          | --          | IGR     | SNP | 0.238 | 32 | 10 |
| --                  | chr20 | 25152223 | A | C  | --          | --          | IGR     | SNP | 0.197 | 49 | 12 |
| <i>ABHD12</i>       | chr20 | 25295897 | G | T  | --          | --          | Intron  | SNP | 0.177 | 65 | 14 |
| <i>GINS1</i>        | chr20 | 25424844 | T | G  | --          | --          | Intron  | SNP | 0.250 | 18 | 6  |
| <i>ZNF337</i>       | chr20 | 25659226 | A | G  | --          | --          | Intron  | SNP | 0.141 | 55 | 9  |
| <i>FAM182B</i>      | chr20 | 25744113 | A | G  | --          | --          | RNA     | SNP | 0.139 | 62 | 10 |
| --                  | chr20 | 25856383 | C | T  | --          | --          | IGR     | SNP | 0.164 | 56 | 11 |
| --                  | chr20 | 25856395 | T | A  | --          | --          | IGR     | SNP | 0.152 | 56 | 10 |
| --                  | chr20 | 25862652 | A | G  | --          | --          | IGR     | SNP | 0.149 | 63 | 11 |
| --                  | chr20 | 25862661 | A | G  | --          | --          | IGR     | SNP | 0.164 | 61 | 12 |
| <i>LOC284801</i>    | chr20 | 26179161 | G | C  | --          | --          | RNA     | SNP | 0.163 | 36 | 7  |
| --                  | chr20 | 26240687 | A | G  | --          | --          | IGR     | SNP | 0.100 | 63 | 7  |
| --                  | chr20 | 29485304 | C | G  | --          | --          | IGR     | SNP | 0.198 | 69 | 17 |
| --                  | chr20 | 29575967 | C | G  | --          | --          | IGR     | SNP | 0.257 | 52 | 18 |
| --                  | chr20 | 29827037 | G | A  | --          | --          | IGR     | SNP | 0.272 | 67 | 25 |
| --                  | chr20 | 29885874 | C | A  | --          | --          | IGR     | SNP | 0.371 | 44 | 26 |
| --                  | chr20 | 29921249 | C | A  | --          | --          | IGR     | SNP | 0.188 | 26 | 6  |
| --                  | chr20 | 29925116 | A | G  | --          | --          | IGR     | SNP | 0.121 | 29 | 4  |
| --                  | chr20 | 29925132 | A | T  | --          | --          | IGR     | SNP | 0.125 | 28 | 4  |
| --                  | chr20 | 29953576 | - | AT | --          | --          | IGR     | INS | 0.151 | 62 | 11 |
| <i>REM1</i>         | chr20 | 30065146 | T | A  | --          | --          | Intron  | SNP | 0.183 | 49 | 11 |
| --                  | chr20 | 30172992 | G | T  | --          | --          | IGR     | SNP | 0.148 | 23 | 4  |
| <i>TPX2</i>         | chr20 | 30331930 | C | G  | --          | --          | Intron  | SNP | 0.278 | 26 | 10 |
| <i>TPX2</i>         | chr20 | 30332082 | C | A  | --          | --          | Intron  | SNP | 0.500 | 22 | 22 |
| <i>TTL9</i>         | chr20 | 30501030 | G | A  | --          | --          | Intron  | SNP | 0.517 | 29 | 31 |
| <i>TM9SF4</i>       | chr20 | 30714262 | G | A  | --          | --          | Intron  | SNP | 0.378 | 56 | 34 |
| --                  | chr20 | 31098973 | G | C  | --          | --          | IGR     | SNP | 0.159 | 53 | 10 |
| --                  | chr20 | 31497892 | A | G  | --          | --          | IGR     | SNP | 0.227 | 68 | 20 |
| --                  | chr20 | 31736266 | G | A  | --          | --          | IGR     | SNP | 0.370 | 58 | 34 |
| <i>BPIFA2</i>       | chr20 | 31758236 | G | C  | --          | --          | Intron  | SNP | 0.500 | 34 | 34 |
| --                  | chr20 | 31773650 | G | A  | --          | --          | IGR     | SNP | 0.125 | 35 | 5  |
| <i>BPIFA4P</i>      | chr20 | 31783075 | T | A  | --          | --          | RNA     | SNP | 0.208 | 61 | 16 |
| --                  | chr20 | 31902162 | G | C  | --          | --          | IGR     | SNP | 0.138 | 69 | 11 |
| <i>CDK5RAP1</i>     | chr20 | 31967429 | G | A  | C675T,C945T | F225F,F315F | Silent  | SNP | 0.590 | 34 | 49 |
| <i>ZNF341</i>       | chr20 | 32335440 | A | C  | --          | --          | Intron  | SNP | 0.125 | 21 | 3  |
| <i>ZNF341</i>       | chr20 | 32344191 | G | T  | --          | --          | Intron  | SNP | 0.200 | 16 | 4  |
| <i>ITCH</i>         | chr20 | 33062255 | G | A  | --          | --          | Intron  | SNP | 0.162 | 31 | 6  |
| <i>NCOA6</i>        | chr20 | 33394171 | C | T  | --          | --          | Intron  | SNP | 0.197 | 57 | 14 |
| --                  | chr20 | 33424723 | G | C  | --          | --          | IGR     | SNP | 0.559 | 30 | 38 |
| <i>TRPC4AP</i>      | chr20 | 33670889 | T | C  | --          | --          | Intron  | SNP | 0.543 | 21 | 25 |
| --                  | chr20 | 33795478 | G | A  | --          | --          | IGR     | SNP | 0.225 | 55 | 16 |
| --                  | chr20 | 34007894 | G | C  | --          | --          | IGR     | SNP | 0.247 | 61 | 20 |
| <i>GDF5</i>         | chr20 | 34026665 | T | G  | --          | --          | 5'Flank | SNP | 0.167 | 35 | 7  |
| --                  | chr20 | 34112880 | A | T  | --          | --          | IGR     | SNP | 0.125 | 63 | 9  |
| --                  | chr20 | 34112881 | G | T  | --          | --          | IGR     | SNP | 0.123 | 64 | 9  |
| <i>CPNE1,RBM1</i>   | chr20 | 34251587 | A | C  | --          | --          | Intron  | SNP | 0.600 | 26 | 39 |
| --                  | chr20 | 34344385 | A | C  | --          | --          | IGR     | SNP | 0.122 | 36 | 5  |
| <i>PHF20</i>        | chr20 | 34427064 | G | A  | --          | --          | Intron  | SNP | 0.163 | 36 | 7  |
| --                  | chr20 | 34676125 | G | T  | --          | --          | IGR     | SNP | 0.114 | 31 | 4  |
| <i>EPB41L1</i>      | chr20 | 34721601 | A | G  | --          | --          | Intron  | SNP | 0.141 | 61 | 10 |
| <i>EPB41L1</i>      | chr20 | 34734677 | A | T  | --          | --          | Intron  | SNP | 0.125 | 77 | 11 |
| <i>EPB41L1</i>      | chr20 | 34768279 | C | T  | --          | --          | Intron  | SNP | 0.202 | 87 | 22 |
| <i>DLGAP4</i>       | chr20 | 34995104 | C | A  | --          | --          | 5'Flank | SNP | 0.244 | 68 | 22 |
| <i>DLGAP4</i>       | chr20 | 35135342 | G | A  | --          | --          | Intron  | SNP | 0.143 | 84 | 14 |
| <i>TGIF2,TGIF2-</i> | chr20 | 35214887 | C | T  | --          | --          | Intron  | SNP | 0.273 | 32 | 12 |
| <i>TGIF2-C20OF</i>  | chr20 | 35223638 | G | C  | --          | --          | Intron  | SNP | 0.175 | 52 | 11 |
| <i>SLA2</i>         | chr20 | 35257762 | C | T  | --          | --          | Intron  | SNP | 0.596 | 21 | 31 |
| <i>DSN1</i>         | chr20 | 35391837 | G | A  | --          | --          | Intron  | SNP | 0.105 | 34 | 4  |
| --                  | chr20 | 35726038 | A | T  | --          | --          | IGR     | SNP | 0.247 | 58 | 19 |

|                  |       |          |    |   |    |    |         |     |       |    |    |
|------------------|-------|----------|----|---|----|----|---------|-----|-------|----|----|
| <i>C20orf132</i> | chr20 | 35770752 | G  | A | -- | -- | Intron  | SNP | 0.378 | 28 | 17 |
| <i>C20orf132</i> | chr20 | 35788621 | C  | A | -- | -- | Intron  | SNP | 0.178 | 60 | 13 |
| --               | chr20 | 35969096 | C  | A | -- | -- | IGR     | SNP | 0.154 | 99 | 18 |
| <i>SRC</i>       | chr20 | 36016154 | T  | G | -- | -- | Intron  | SNP | 0.114 | 31 | 4  |
| <i>LBP</i>       | chr20 | 36990729 | G  | T | -- | -- | Intron  | SNP | 0.174 | 19 | 4  |
| <i>RALGAPB</i>   | chr20 | 37134752 | T  | C | -- | -- | Intron  | SNP | 0.269 | 38 | 14 |
| --               | chr20 | 37372696 | C  | T | -- | -- | IGR     | SNP | 0.507 | 33 | 34 |
| <i>PPP1R16B</i>  | chr20 | 37454711 | G  | A | -- | -- | Intron  | SNP | 0.174 | 71 | 15 |
| <i>PPP1R16B</i>  | chr20 | 37477124 | C  | A | -- | -- | Intron  | SNP | 0.171 | 58 | 12 |
| <i>PPP1R16B</i>  | chr20 | 37527020 | G  | T | -- | -- | Intron  | SNP | 0.563 | 21 | 27 |
| <i>DHX35</i>     | chr20 | 37617955 | C  | T | -- | -- | Intron  | SNP | 0.438 | 9  | 7  |
| --               | chr20 | 37719271 | T  | C | -- | -- | IGR     | SNP | 0.382 | 47 | 29 |
| --               | chr20 | 37924697 | A  | G | -- | -- | IGR     | SNP | 0.429 | 12 | 9  |
| --               | chr20 | 37939248 | G  | C | -- | -- | IGR     | SNP | 0.129 | 54 | 8  |
| --               | chr20 | 38372731 | T  | G | -- | -- | IGR     | SNP | 0.208 | 57 | 15 |
| --               | chr20 | 38430659 | T  | A | -- | -- | IGR     | SNP | 0.200 | 16 | 4  |
| --               | chr20 | 38430668 | CA | - | -- | -- | IGR     | DEL | 0.130 | 20 | 3  |
| --               | chr20 | 38492617 | G  | C | -- | -- | IGR     | SNP | 0.237 | 58 | 18 |
| --               | chr20 | 38503915 | A  | C | -- | -- | IGR     | SNP | 0.190 | 17 | 4  |
| --               | chr20 | 38806919 | C  | T | -- | -- | IGR     | SNP | 0.153 | 61 | 11 |
| --               | chr20 | 38810997 | G  | A | -- | -- | IGR     | SNP | 0.143 | 54 | 9  |
| --               | chr20 | 38953580 | T  | A | -- | -- | IGR     | SNP | 0.149 | 57 | 10 |
| --               | chr20 | 39064045 | T  | A | -- | -- | IGR     | SNP | 0.153 | 50 | 9  |
| --               | chr20 | 39603638 | T  | G | -- | -- | IGR     | SNP | 0.441 | 33 | 26 |
| --               | chr20 | 39621960 | C  | A | -- | -- | IGR     | SNP | 0.154 | 55 | 10 |
| --               | chr20 | 39631161 | C  | T | -- | -- | IGR     | SNP | 0.205 | 35 | 9  |
| --               | chr20 | 39653713 | G  | A | -- | -- | IGR     | SNP | 0.271 | 51 | 19 |
| <i>CHD6</i>      | chr20 | 40030721 | T  | C | -- | -- | 3'Flank | SNP | 0.483 | 46 | 43 |
| --               | chr20 | 40260182 | G  | A | -- | -- | IGR     | SNP | 0.167 | 20 | 4  |
| --               | chr20 | 40409047 | C  | G | -- | -- | IGR     | SNP | 0.309 | 56 | 25 |
| --               | chr20 | 40417024 | A  | C | -- | -- | IGR     | SNP | 0.115 | 54 | 7  |
| --               | chr20 | 40438775 | C  | G | -- | -- | IGR     | SNP | 0.433 | 38 | 29 |
| <i>PTPRT</i>     | chr20 | 40729098 | C  | T | -- | -- | Intron  | SNP | 0.129 | 54 | 8  |
| <i>PTPRT</i>     | chr20 | 40744128 | G  | T | -- | -- | Intron  | SNP | 0.175 | 80 | 17 |
| <i>PTPRT</i>     | chr20 | 41117459 | C  | T | -- | -- | Intron  | SNP | 0.344 | 21 | 11 |
| <i>PTPRT</i>     | chr20 | 41202947 | G  | T | -- | -- | Intron  | SNP | 0.451 | 39 | 32 |
| <i>PTPRT</i>     | chr20 | 41236457 | C  | T | -- | -- | Intron  | SNP | 0.658 | 27 | 52 |
| <i>PTPRT</i>     | chr20 | 41288994 | C  | A | -- | -- | Intron  | SNP | 0.338 | 49 | 25 |
| <i>PTPRT</i>     | chr20 | 41297524 | TG | - | -- | -- | Intron  | DEL | 0.125 | 14 | 2  |
| <i>PTPRT</i>     | chr20 | 41351067 | G  | C | -- | -- | Intron  | SNP | 0.130 | 67 | 10 |
| <i>PTPRT</i>     | chr20 | 41534685 | T  | A | -- | -- | Intron  | SNP | 0.125 | 21 | 3  |
| <i>PTPRT</i>     | chr20 | 41619080 | G  | T | -- | -- | Intron  | SNP | 0.163 | 36 | 7  |
| <i>PTPRT</i>     | chr20 | 41801530 | G  | T | -- | -- | Intron  | SNP | 0.154 | 22 | 4  |
| <i>PTPRT</i>     | chr20 | 41808070 | A  | G | -- | -- | Intron  | SNP | 0.163 | 36 | 7  |
| --               | chr20 | 41944180 | T  | A | -- | -- | IGR     | SNP | 0.268 | 60 | 22 |
| <i>IFT52</i>     | chr20 | 42243186 | TG | - | -- | -- | Intron  | DEL | 0.109 | 41 | 5  |
| <i>IFT52</i>     | chr20 | 42248550 | C  | T | -- | -- | Intron  | SNP | 0.160 | 21 | 4  |
| --               | chr20 | 42366193 | C  | T | -- | -- | IGR     | SNP | 0.176 | 61 | 13 |
| --               | chr20 | 42394866 | C  | T | -- | -- | IGR     | SNP | 0.388 | 41 | 26 |
| --               | chr20 | 42866888 | C  | T | -- | -- | IGR     | SNP | 0.121 | 58 | 8  |
| <i>GDAP1L1</i>   | chr20 | 42888234 | C  | G | -- | -- | Intron  | SNP | 0.135 | 45 | 7  |
| <i>HNF4A</i>     | chr20 | 43005426 | T  | C | -- | -- | Intron  | SNP | 0.109 | 57 | 7  |
| <i>HNF4A</i>     | chr20 | 43055558 | G  | A | -- | -- | Intron  | SNP | 0.613 | 36 | 57 |
| <i>PKIG</i>      | chr20 | 43167419 | A  | C | -- | -- | Intron  | SNP | 0.390 | 47 | 30 |
| <i>PKIG</i>      | chr20 | 43195307 | C  | T | -- | -- | Intron  | SNP | 0.281 | 41 | 16 |
| <i>WISP2</i>     | chr20 | 43350819 | A  | G | -- | -- | Intron  | SNP | 0.183 | 58 | 13 |
| --               | chr20 | 43464384 | C  | G | -- | -- | IGR     | SNP | 0.303 | 46 | 20 |
| --               | chr20 | 43477869 | G  | A | -- | -- | IGR     | SNP | 0.153 | 50 | 9  |
| <i>PABPC1L</i>   | chr20 | 43554326 | G  | A | -- | -- | Intron  | SNP | 0.213 | 63 | 17 |
| <i>PI3</i>       | chr20 | 43802683 | A  | T | -- | -- | 5'Flank | SNP | 0.114 | 39 | 5  |
| --               | chr20 | 43877481 | A  | G | -- | -- | IGR     | SNP | 0.565 | 30 | 39 |
| --               | chr20 | 43952078 | C  | T | -- | -- | IGR     | SNP | 0.417 | 42 | 30 |
| --               | chr20 | 44158111 | T  | C | -- | -- | IGR     | SNP | 0.169 | 54 | 11 |
| <i>WFDC10B</i>   | chr20 | 44320961 | G  | A | -- | -- | Intron  | SNP | 0.273 | 8  | 3  |
| <i>WFDC13</i>    | chr20 | 44337930 | T  | C | -- | -- | 3'Flank | SNP | 0.167 | 70 | 14 |
| --               | chr20 | 44385895 | C  | A | -- | -- | IGR     | SNP | 0.167 | 20 | 4  |
| --               | chr20 | 44390127 | A  | G | -- | -- | IGR     | SNP | 0.120 | 22 | 3  |
| --               | chr20 | 44780995 | T  | C | -- | -- | IGR     | SNP | 0.413 | 37 | 26 |
| --               | chr20 | 44968916 | C  | T | -- | -- | IGR     | SNP | 0.528 | 17 | 19 |
| --               | chr20 | 45097471 | G  | T | -- | -- | IGR     | SNP | 0.357 | 45 | 25 |
| <i>SLC13A3</i>   | chr20 | 45215591 | A  | G | -- | -- | Intron  | SNP | 0.388 | 52 | 33 |
| <i>SLC13A3</i>   | chr20 | 45305175 | C  | T | -- | -- | Intron  | SNP | 0.357 | 18 | 10 |
| --               | chr20 | 45491173 | C  | A | -- | -- | IGR     | SNP | 0.180 | 50 | 11 |
| <i>EYA2</i>      | chr20 | 45526891 | G  | T | -- | -- | Intron  | SNP | 0.186 | 35 | 8  |
| <i>EYA2</i>      | chr20 | 45781643 | C  | G | -- | -- | Intron  | SNP | 0.222 | 49 | 14 |
| <i>ZMYND8</i>    | chr20 | 45881035 | C  | A | -- | -- | Intron  | SNP | 0.222 | 14 | 4  |
| <i>ZMYND8</i>    | chr20 | 45894716 | C  | G | -- | -- | Intron  | SNP | 0.560 | 33 | 42 |
| <i>NCOA3</i>     | chr20 | 46223871 | C  | G | -- | -- | Intron  | SNP | 0.106 | 42 | 5  |
| --               | chr20 | 46467455 | C  | T | -- | -- | IGR     | SNP | 0.156 | 38 | 7  |
| --               | chr20 | 46564750 | G  | A | -- | -- | IGR     | SNP | 0.217 | 54 | 15 |

|                  |       |          |           |    |                          |                 |         |       |       |    |    |
|------------------|-------|----------|-----------|----|--------------------------|-----------------|---------|-------|-------|----|----|
| --               | chr20 | 46648041 | AG        | -  | --                       | --              | IGR     | DEL   | 0.157 | 59 | 11 |
| --               | chr20 | 46758183 | A         | T  | --                       | --              | IGR     | SNP   | 0.581 | 39 | 54 |
| --               | chr20 | 46914877 | G         | A  | --                       | --              | IGR     | SNP   | 0.226 | 48 | 14 |
| --               | chr20 | 47091428 | G         | A  | --                       | --              | IGR     | SNP   | 0.198 | 73 | 18 |
| --               | chr20 | 47161962 | G         | A  | --                       | --              | IGR     | SNP   | 0.245 | 71 | 23 |
| --               | chr20 | 47208802 | C         | T  | --                       | --              | IGR     | SNP   | 0.250 | 33 | 11 |
| --               | chr20 | 47451958 | G         | T  | --                       | --              | IGR     | SNP   | 0.272 | 75 | 28 |
| --               | chr20 | 47496382 | C         | A  | --                       | --              | IGR     | SNP   | 0.198 | 81 | 20 |
| <i>ARFGEF2</i>   | chr20 | 47546346 | C         | A  | --                       | --              | Intron  | SNP   | 0.145 | 59 | 10 |
| <i>ZNF1-AS1</i>  | chr20 | 47895388 | G         | A  | --                       | --              | RNA     | SNP   | 0.242 | 94 | 30 |
| --               | chr20 | 48234978 | C         | T  | --                       | --              | IGR     | SNP   | 0.105 | 34 | 4  |
| --               | chr20 | 48365697 | C         | T  | --                       | --              | IGR     | SNP   | 0.182 | 18 | 4  |
| --               | chr20 | 48608282 | G         | A  | --                       | --              | IGR     | SNP   | 0.148 | 23 | 4  |
| --               | chr20 | 48650689 | G         | C  | --                       | --              | IGR     | SNP   | 0.394 | 40 | 26 |
| --               | chr20 | 49055591 | C         | T  | --                       | --              | IGR     | SNP   | 0.227 | 34 | 10 |
| <i>PTPN1</i>     | chr20 | 49162723 | C         | T  | --                       | --              | Intron  | SNP   | 0.193 | 67 | 16 |
| --               | chr20 | 49261064 | A         | T  | --                       | --              | IGR     | SNP   | 0.145 | 53 | 9  |
| --               | chr20 | 49266226 | C         | T  | --                       | --              | IGR     | SNP   | 0.338 | 47 | 24 |
| --               | chr20 | 49399880 | G         | A  | --                       | --              | IGR     | SNP   | 0.475 | 42 | 38 |
| <i>BCAS4</i>     | chr20 | 49470223 | G         | A  | --                       | --              | Intron  | SNP   | 0.121 | 29 | 4  |
| <i>ADNP</i>      | chr20 | 49548455 | C         | G  | --                       | --              | 5'Flank | SNP   | 0.321 | 53 | 25 |
| --               | chr20 | 49607580 | G         | A  | --                       | --              | IGR     | SNP   | 0.151 | 73 | 13 |
| --               | chr20 | 49665015 | T         | C  | --                       | --              | IGR     | SNP   | 0.105 | 68 | 8  |
| --               | chr20 | 49725737 | T         | G  | --                       | --              | IGR     | SNP   | 0.186 | 70 | 16 |
| --               | chr20 | 49727909 | G         | A  | --                       | --              | IGR     | SNP   | 0.600 | 36 | 54 |
| --               | chr20 | 49789844 | G         | C  | --                       | --              | IGR     | SNP   | 0.106 | 76 | 9  |
| --               | chr20 | 49823200 | G         | T  | --                       | --              | IGR     | SNP   | 0.211 | 15 | 4  |
| --               | chr20 | 49972244 | T         | G  | --                       | --              | IGR     | SNP   | 0.243 | 53 | 17 |
| --               | chr20 | 50211516 | C         | T  | --                       | --              | IGR     | SNP   | 0.113 | 55 | 7  |
| --               | chr20 | 50446400 | A         | T  | --                       | --              | IGR     | SNP   | 0.174 | 19 | 4  |
| --               | chr20 | 50547726 | C         | A  | --                       | --              | IGR     | SNP   | 0.188 | 56 | 13 |
| <i>ZFP64</i>     | chr20 | 50804872 | G         | T  | --                       | --              | Intron  | SNP   | 0.125 | 21 | 3  |
| --               | chr20 | 51100534 | G         | A  | --                       | --              | IGR     | SNP   | 0.211 | 15 | 4  |
| --               | chr20 | 51169062 | T         | C  | --                       | --              | IGR     | SNP   | 0.125 | 56 | 8  |
| --               | chr20 | 51199776 | G         | T  | --                       | --              | IGR     | SNP   | 0.303 | 23 | 10 |
| --               | chr20 | 51279058 | A         | T  | --                       | --              | IGR     | SNP   | 0.363 | 51 | 29 |
| --               | chr20 | 51529632 | C         | A  | --                       | --              | IGR     | SNP   | 0.173 | 62 | 13 |
| <i>TSHZ2</i>     | chr20 | 51923724 | T         | G  | --                       | --              | Intron  | SNP   | 0.247 | 61 | 20 |
| --               | chr20 | 52116778 | GTGTATATA | -  | --                       | --              | IGR     | DEL   | 0.158 | 16 | 3  |
| --               | chr20 | 52231785 | C         | T  | --                       | --              | IGR     | SNP   | 0.167 | 20 | 4  |
| --               | chr20 | 52284113 | T         | A  | --                       | --              | IGR     | SNP   | 0.203 | 47 | 12 |
| --               | chr20 | 52288828 | G         | T  | --                       | --              | IGR     | SNP   | 0.250 | 12 | 4  |
| --               | chr20 | 52387144 | G         | T  | --                       | --              | IGR     | SNP   | 0.235 | 13 | 4  |
| --               | chr20 | 52525946 | A         | T  | --                       | --              | IGR     | SNP   | 0.234 | 49 | 15 |
| --               | chr20 | 52886433 | G         | C  | --                       | --              | IGR     | SNP   | 0.239 | 51 | 16 |
| --               | chr20 | 52892541 | G         | T  | --                       | --              | IGR     | SNP   | 0.130 | 67 | 10 |
| --               | chr20 | 52944712 | C         | A  | --                       | --              | IGR     | SNP   | 0.265 | 61 | 22 |
| --               | chr20 | 53072692 | A         | T  | --                       | --              | IGR     | SNP   | 0.109 | 49 | 6  |
| --               | chr20 | 53336363 | T         | G  | --                       | --              | IGR     | SNP   | 0.359 | 41 | 23 |
| --               | chr20 | 53522627 | A         | T  | --                       | --              | IGR     | SNP   | 0.263 | 14 | 5  |
| --               | chr20 | 53536060 | C         | A  | --                       | --              | IGR     | SNP   | 0.114 | 31 | 4  |
| --               | chr20 | 53648741 | G         | A  | --                       | --              | IGR     | SNP   | 0.138 | 50 | 8  |
| --               | chr20 | 54064728 | G         | A  | --                       | --              | IGR     | SNP   | 0.197 | 57 | 14 |
| --               | chr20 | 54252931 | C         | T  | --                       | --              | IGR     | SNP   | 0.171 | 34 | 7  |
| --               | chr20 | 54289035 | -         | GT | --                       | --              | IGR     | INS   | 0.186 | 57 | 13 |
| --               | chr20 | 54317197 | T         | C  | --                       | --              | IGR     | SNP   | 0.463 | 36 | 31 |
| --               | chr20 | 54350113 | C         | A  | --                       | --              | IGR     | SNP   | 0.467 | 48 | 42 |
| --               | chr20 | 54686383 | G         | T  | --                       | --              | IGR     | SNP   | 0.211 | 30 | 8  |
| --               | chr20 | 55178568 | T         | A  | --                       | --              | IGR     | SNP   | 0.419 | 18 | 13 |
| --               | chr20 | 55346310 | C         | G  | --                       | --              | IGR     | SNP   | 0.463 | 29 | 25 |
| --               | chr20 | 55583968 | C         | T  | --                       | --              | IGR     | SNP   | 0.565 | 27 | 35 |
| <i>BMP7</i>      | chr20 | 55772074 | C         | T  | --                       | --              | Intron  | SNP   | 0.404 | 31 | 21 |
| --               | chr20 | 55850811 | C         | T  | --                       | --              | IGR     | SNP   | 0.402 | 61 | 41 |
| --               | chr20 | 55894829 | C         | T  | --                       | --              | IGR     | SNP   | 0.205 | 97 | 25 |
| <i>MIR4325</i>   | chr20 | 55897340 | T         | A  | --                       | --              | 5'Flank | SNP   | 0.103 | 78 | 9  |
| <i>MIR5095</i>   | chr20 | 55913951 | C         | A  | --                       | --              | RNA     | SNP   | 0.574 | 26 | 35 |
| --               | chr20 | 56016758 | C         | A  | --                       | --              | IGR     | SNP   | 0.227 | 68 | 20 |
| --               | chr20 | 56118166 | C         | T  | --                       | --              | IGR     | SNP   | 0.621 | 39 | 64 |
| --               | chr20 | 56118359 | C         | G  | --                       | --              | IGR     | SNP   | 0.598 | 39 | 58 |
| --               | chr20 | 56119128 | C         | T  | --                       | --              | IGR     | SNP   | 0.569 | 31 | 41 |
| <i>ZBP1</i>      | chr20 | 56178160 | C         | T  | --                       | --              | 3'Flank | SNP   | 0.146 | 82 | 14 |
| --               | chr20 | 56542415 | G         | C  | --                       | --              | IGR     | SNP   | 0.176 | 84 | 18 |
| --               | chr20 | 56546347 | G         | A  | --                       | --              | IGR     | SNP   | 0.567 | 39 | 51 |
| <i>PPP4R1L</i>   | chr20 | 56808775 | C         | T  | --                       | --              | RNA     | SNP   | 0.194 | 50 | 12 |
| <i>LOC149773</i> | chr20 | 57116375 | T         | C  | --                       | --              | RNA     | SNP   | 0.329 | 51 | 25 |
| --               | chr20 | 57217443 | A         | G  | --                       | --              | IGR     | SNP   | 0.120 | 73 | 10 |
| <i>STX16</i>     | chr20 | 57244444 | C         | T  | C332T,C440T,S111L,S147L, | Missense_mutati | SNP     | 0.640 | 32    | 57 |    |
| <i>GNAS</i>      | chr20 | 57436278 | A         | G  | --                       | --              | Intron  | SNP   | 0.447 | 42 | 34 |
| --               | chr20 | 57629234 | AT        | -  | --                       | --              | IGR     | DEL   | 0.143 | 18 | 3  |
| --               | chr20 | 57713846 | A         | G  | --                       | --              | IGR     | SNP   | 0.183 | 58 | 13 |

|             |       |          |        |   |    |    |         |     |       |    |    |
|-------------|-------|----------|--------|---|----|----|---------|-----|-------|----|----|
| --          | chr20 | 57724232 | G      | C | -- | -- | IGR     | SNP | 0.170 | 93 | 19 |
| --          | chr20 | 57908334 | C      | T | -- | -- | IGR     | SNP | 0.106 | 59 | 7  |
| --          | chr20 | 57959680 | G      | A | -- | -- | IGR     | SNP | 0.294 | 12 | 5  |
| --          | chr20 | 58045546 | G      | A | -- | -- | IGR     | SNP | 0.101 | 71 | 8  |
| --          | chr20 | 58151233 | A      | T | -- | -- | IGR     | SNP | 0.129 | 88 | 13 |
| PHACTR3     | chr20 | 58281883 | T      | G | -- | -- | Intron  | SNP | 0.171 | 68 | 14 |
| PHACTR3     | chr20 | 58309918 | A      | G | -- | -- | Intron  | SNP | 0.188 | 56 | 13 |
| C20orf177   | chr20 | 58515524 | C      | A | -- | -- | 5'UTR   | SNP | 0.383 | 29 | 18 |
| --          | chr20 | 59105042 | G      | A | -- | -- | IGR     | SNP | 0.129 | 74 | 11 |
| --          | chr20 | 59153881 | A      | C | -- | -- | IGR     | SNP | 0.154 | 66 | 12 |
| --          | chr20 | 59209785 | G      | T | -- | -- | IGR     | SNP | 0.185 | 66 | 15 |
| --          | chr20 | 59252851 | C      | A | -- | -- | IGR     | SNP | 0.319 | 47 | 22 |
| --          | chr20 | 59333385 | GTTTAT | - | -- | -- | IGR     | DEL | 0.596 | 21 | 31 |
| --          | chr20 | 59408283 | A      | T | -- | -- | IGR     | SNP | 0.220 | 46 | 13 |
| --          | chr20 | 59432039 | G      | A | -- | -- | IGR     | SNP | 0.250 | 39 | 13 |
| --          | chr20 | 59583187 | T      | C | -- | -- | IGR     | SNP | 0.481 | 28 | 26 |
| --          | chr20 | 59750955 | A      | T | -- | -- | IGR     | SNP | 0.155 | 71 | 13 |
| CDH4        | chr20 | 59944574 | C      | A | -- | -- | Intron  | SNP | 0.125 | 42 | 6  |
| CDH4        | chr20 | 59985911 | G      | A | -- | -- | Intron  | SNP | 0.336 | 97 | 49 |
| CDH4        | chr20 | 60138394 | A      | C | -- | -- | Intron  | SNP | 0.127 | 62 | 9  |
| CDH4        | chr20 | 60154243 | A      | C | -- | -- | Intron  | SNP | 0.184 | 71 | 16 |
| CDH4        | chr20 | 60474113 | G      | A | -- | -- | Intron  | SNP | 0.161 | 47 | 9  |
| --          | chr20 | 60520980 | C      | T | -- | -- | IGR     | SNP | 0.269 | 19 | 7  |
| --          | chr20 | 60521920 | T      | C | -- | -- | IGR     | SNP | 0.200 | 24 | 6  |
| TAF4        | chr20 | 60561277 | A      | C | -- | -- | Intron  | SNP | 0.163 | 87 | 17 |
| TAF4        | chr20 | 60619568 | C      | T | -- | -- | Intron  | SNP | 0.541 | 34 | 40 |
| SS18L1      | chr20 | 60745629 | G      | A | -- | -- | Intron  | SNP | 0.390 | 50 | 32 |
| --          | chr20 | 60783420 | A      | C | -- | -- | IGR     | SNP | 0.118 | 30 | 4  |
| HRH3        | chr20 | 60790921 | G      | A | -- | -- | 3'UTR   | SNP | 0.148 | 69 | 12 |
| GATA5       | chr20 | 61046976 | A      | T | -- | -- | Intron  | SNP | 0.146 | 41 | 7  |
| --          | chr20 | 61306516 | G      | A | -- | -- | IGR     | SNP | 0.359 | 59 | 33 |
| OGFR        | chr20 | 61436494 | C      | T | -- | -- | Intron  | SNP | 0.625 | 3  | 5  |
| TCFL5       | chr20 | 61490072 | G      | A | -- | -- | Intron  | SNP | 0.132 | 33 | 5  |
| DIDO1       | chr20 | 61553016 | C      | T | -- | -- | Intron  | SNP | 0.302 | 30 | 13 |
| BHLHE23     | chr20 | 61639088 | T      | C | -- | -- | 5'Flank | SNP | 0.451 | 28 | 23 |
| NKAIN4      | chr20 | 61880318 | CG     | - | -- | -- | Intron  | DEL | 0.154 | 66 | 12 |
| GMEB2       | chr20 | 62239778 | C      | T | -- | -- | Intron  | SNP | 0.273 | 24 | 9  |
| GMEB2       | chr20 | 62240180 | C      | G | -- | -- | Intron  | SNP | 0.225 | 31 | 9  |
| RTEL1-TNFR1 | chr20 | 62318469 | C      | T | -- | -- | RNA     | SNP | 0.563 | 35 | 45 |
| RTEL1-TNFR1 | chr20 | 62319230 | C      | T | -- | -- | RNA     | SNP | 0.651 | 29 | 54 |
| --          | chr20 | 62445585 | C      | A | -- | -- | IGR     | SNP | 0.364 | 7  | 4  |
| TPD52L2     | chr20 | 62498131 | A      | T | -- | -- | Intron  | SNP | 0.182 | 27 | 6  |
| DNAJC5      | chr20 | 62565998 | C      | T | -- | -- | 3'UTR   | SNP | 0.159 | 69 | 13 |
| OPRL1       | chr20 | 62722232 | A      | G | -- | -- | Intron  | SNP | 0.113 | 47 | 6  |
| --          | chr20 | 62757502 | C      | T | -- | -- | IGR     | SNP | 0.108 | 74 | 9  |
| --          | chr20 | 62759076 | C      | T | -- | -- | IGR     | SNP | 0.125 | 28 | 4  |
| --          | chr20 | 62759085 | CT     | - | -- | -- | IGR     | DEL | 0.132 | 33 | 5  |
| --          | chr20 | 62763214 | G      | C | -- | -- | IGR     | SNP | 0.113 | 47 | 6  |
| --          | chr20 | 62763285 | C      | A | -- | -- | IGR     | SNP | 0.238 | 16 | 5  |
| MYT1        | chr20 | 62867788 | T      | C | -- | -- | Intron  | SNP | 0.138 | 56 | 9  |
| --          | chr21 | 9421489  | G      | A | -- | -- | IGR     | SNP | 0.200 | 16 | 4  |
| --          | chr21 | 9454425  | T      | G | -- | -- | IGR     | SNP | 0.217 | 18 | 5  |
| --          | chr21 | 9455732  | T      | A | -- | -- | IGR     | SNP | 0.100 | 81 | 9  |
| --          | chr21 | 9460359  | A      | C | -- | -- | IGR     | SNP | 0.545 | 5  | 6  |
| --          | chr21 | 9460965  | T      | C | -- | -- | IGR     | SNP | 0.138 | 25 | 4  |
| --          | chr21 | 9462616  | A      | G | -- | -- | IGR     | SNP | 0.100 | 36 | 4  |
| --          | chr21 | 9464906  | T      | C | -- | -- | IGR     | SNP | 0.226 | 24 | 7  |
| --          | chr21 | 9467517  | T      | C | -- | -- | IGR     | SNP | 0.222 | 14 | 4  |
| --          | chr21 | 9482081  | T      | C | -- | -- | IGR     | SNP | 0.235 | 13 | 4  |
| --          | chr21 | 9488703  | A      | G | -- | -- | IGR     | SNP | 0.120 | 22 | 3  |
| --          | chr21 | 9543381  | A      | T | -- | -- | IGR     | SNP | 0.118 | 30 | 4  |
| --          | chr21 | 9543418  | C      | T | -- | -- | IGR     | SNP | 0.146 | 35 | 6  |
| --          | chr21 | 9544116  | C      | A | -- | -- | IGR     | SNP | 0.211 | 15 | 4  |
| --          | chr21 | 9546433  | G      | C | -- | -- | IGR     | SNP | 0.109 | 49 | 6  |
| --          | chr21 | 9547372  | G      | A | -- | -- | IGR     | SNP | 0.333 | 8  | 4  |
| --          | chr21 | 9552121  | ATGAGG | - | -- | -- | IGR     | DEL | 0.167 | 15 | 3  |
| --          | chr21 | 9559545  | AG     | - | -- | -- | IGR     | DEL | 0.158 | 16 | 3  |
| --          | chr21 | 9561719  | A      | C | -- | -- | IGR     | SNP | 0.200 | 20 | 5  |
| --          | chr21 | 9561722  | C      | G | -- | -- | IGR     | SNP | 0.217 | 18 | 5  |
| --          | chr21 | 9563197  | C      | T | -- | -- | IGR     | SNP | 0.172 | 24 | 5  |
| --          | chr21 | 9564094  | A      | T | -- | -- | IGR     | SNP | 0.156 | 54 | 10 |
| --          | chr21 | 9566143  | A      | G | -- | -- | IGR     | SNP | 0.132 | 33 | 5  |
| --          | chr21 | 9573884  | C      | T | -- | -- | IGR     | SNP | 0.178 | 37 | 8  |
| --          | chr21 | 9587080  | C      | G | -- | -- | IGR     | SNP | 0.173 | 43 | 9  |
| --          | chr21 | 9587083  | A      | C | -- | -- | IGR     | SNP | 0.170 | 44 | 9  |
| --          | chr21 | 9655882  | A      | G | -- | -- | IGR     | SNP | 0.104 | 69 | 8  |
| --          | chr21 | 9662472  | G      | C | -- | -- | IGR     | SNP | 0.538 | 60 | 70 |
| --          | chr21 | 9663503  | G      | T | -- | -- | IGR     | SNP | 0.400 | 54 | 36 |
| --          | chr21 | 9663513  | G      | T | -- | -- | IGR     | SNP | 0.452 | 51 | 42 |
| --          | chr21 | 9663629  | G      | C | -- | -- | IGR     | SNP | 0.637 | 37 | 65 |

|            |       |          |     |    |    |    |        |     |       |     |    |
|------------|-------|----------|-----|----|----|----|--------|-----|-------|-----|----|
| --         | chr21 | 9663773  | G   | C  | -- | -- | IGR    | SNP | 0.365 | 73  | 42 |
| --         | chr21 | 9678976  | G   | T  | -- | -- | IGR    | SNP | 0.109 | 41  | 5  |
| --         | chr21 | 9678977  | A   | G  | -- | -- | IGR    | SNP | 0.109 | 41  | 5  |
| --         | chr21 | 9681018  | G   | C  | -- | -- | IGR    | SNP | 0.122 | 36  | 5  |
| --         | chr21 | 9687293  | C   | T  | -- | -- | IGR    | SNP | 0.121 | 94  | 13 |
| --         | chr21 | 9687304  | C   | A  | -- | -- | IGR    | SNP | 0.128 | 95  | 14 |
| --         | chr21 | 9687472  | T   | C  | -- | -- | IGR    | SNP | 0.140 | 37  | 6  |
| --         | chr21 | 9687482  | C   | A  | -- | -- | IGR    | SNP | 0.107 | 50  | 6  |
| --         | chr21 | 9687536  | C   | T  | -- | -- | IGR    | SNP | 0.113 | 110 | 14 |
| --         | chr21 | 9705929  | C   | T  | -- | -- | IGR    | SNP | 0.143 | 24  | 4  |
| --         | chr21 | 9705949  | A   | T  | -- | -- | IGR    | SNP | 0.132 | 33  | 5  |
| --         | chr21 | 9712600  | G   | A  | -- | -- | IGR    | SNP | 0.118 | 82  | 11 |
| --         | chr21 | 9720461  | T   | C  | -- | -- | IGR    | SNP | 0.152 | 56  | 10 |
| --         | chr21 | 9720772  | G   | T  | -- | -- | IGR    | SNP | 0.171 | 29  | 6  |
| --         | chr21 | 9722547  | G   | A  | -- | -- | IGR    | SNP | 0.147 | 29  | 5  |
| --         | chr21 | 9727137  | A   | G  | -- | -- | IGR    | SNP | 0.214 | 22  | 6  |
| --         | chr21 | 9727145  | T   | C  | -- | -- | IGR    | SNP | 0.176 | 28  | 6  |
| --         | chr21 | 9731317  | G   | T  | -- | -- | IGR    | SNP | 0.286 | 20  | 8  |
| --         | chr21 | 9731332  | A   | G  | -- | -- | IGR    | SNP | 0.346 | 17  | 9  |
| --         | chr21 | 9731356  | T   | A  | -- | -- | IGR    | SNP | 0.238 | 16  | 5  |
| --         | chr21 | 9731624  | G   | A  | -- | -- | IGR    | SNP | 0.313 | 11  | 5  |
| --         | chr21 | 9731628  | A   | G  | -- | -- | IGR    | SNP | 0.333 | 10  | 5  |
| --         | chr21 | 9734829  | T   | G  | -- | -- | IGR    | SNP | 0.286 | 15  | 6  |
| --         | chr21 | 9768734  | C   | T  | -- | -- | IGR    | SNP | 0.121 | 29  | 4  |
| --         | chr21 | 9888506  | G   | C  | -- | -- | IGR    | SNP | 0.145 | 59  | 10 |
| TEKT4P2    | chr21 | 9933503  | T   | C  | -- | -- | RNA    | SNP | 0.250 | 12  | 4  |
| TEKT4P2    | chr21 | 9933921  | C   | G  | -- | -- | RNA    | SNP | 0.308 | 9   | 4  |
| TEKT4P2    | chr21 | 9943760  | -   | AT | -- | -- | RNA    | INS | 0.115 | 77  | 10 |
| --         | chr21 | 9976650  | ATT | -  | -- | -- | IGR    | DEL | 0.128 | 34  | 5  |
| --         | chr21 | 10009344 | T   | C  | -- | -- | IGR    | SNP | 0.267 | 11  | 4  |
| --         | chr21 | 10009374 | A   | G  | -- | -- | IGR    | SNP | 0.167 | 15  | 3  |
| --         | chr21 | 10022572 | G   | T  | -- | -- | IGR    | SNP | 0.400 | 36  | 24 |
| --         | chr21 | 10026989 | C   | T  | -- | -- | IGR    | SNP | 0.214 | 22  | 6  |
| --         | chr21 | 10026995 | T   | G  | -- | -- | IGR    | SNP | 0.240 | 19  | 6  |
| --         | chr21 | 10118508 | G   | C  | -- | -- | IGR    | SNP | 0.163 | 36  | 7  |
| --         | chr21 | 10118568 | C   | T  | -- | -- | IGR    | SNP | 0.147 | 29  | 5  |
| --         | chr21 | 10131134 | G   | T  | -- | -- | IGR    | SNP | 0.107 | 50  | 6  |
| --         | chr21 | 10136121 | A   | T  | -- | -- | IGR    | SNP | 0.138 | 25  | 4  |
| --         | chr21 | 10136320 | G   | C  | -- | -- | IGR    | SNP | 0.105 | 34  | 4  |
| --         | chr21 | 10136365 | G   | T  | -- | -- | IGR    | SNP | 0.148 | 23  | 4  |
| --         | chr21 | 10150816 | G   | A  | -- | -- | IGR    | SNP | 0.136 | 19  | 3  |
| --         | chr21 | 10150873 | T   | C  | -- | -- | IGR    | SNP | 0.125 | 35  | 5  |
| --         | chr21 | 10153457 | T   | G  | -- | -- | IGR    | SNP | 0.318 | 15  | 7  |
| --         | chr21 | 10153477 | A   | G  | -- | -- | IGR    | SNP | 0.318 | 15  | 7  |
| --         | chr21 | 10161335 | C   | T  | -- | -- | IGR    | SNP | 0.500 | 10  | 10 |
| --         | chr21 | 10189603 | T   | A  | -- | -- | IGR    | SNP | 0.385 | 8   | 5  |
| --         | chr21 | 10190564 | A   | T  | -- | -- | IGR    | SNP | 0.130 | 47  | 7  |
| --         | chr21 | 10190586 | T   | A  | -- | -- | IGR    | SNP | 0.115 | 54  | 7  |
| --         | chr21 | 10200935 | G   | A  | -- | -- | IGR    | SNP | 0.162 | 31  | 6  |
| --         | chr21 | 10207534 | T   | C  | -- | -- | IGR    | SNP | 0.250 | 15  | 5  |
| --         | chr21 | 10475531 | A   | G  | -- | -- | IGR    | SNP | 0.121 | 58  | 8  |
| --         | chr21 | 10518860 | A   | T  | -- | -- | IGR    | SNP | 0.526 | 9   | 10 |
| --         | chr21 | 10708613 | G   | C  | -- | -- | IGR    | SNP | 0.107 | 25  | 3  |
| --         | chr21 | 10770844 | G   | T  | -- | -- | IGR    | SNP | 0.300 | 7   | 3  |
| TPTE       | chr21 | 10907678 | C   | T  | -- | -- | Intron | SNP | 0.373 | 47  | 28 |
| TPTE       | chr21 | 10920378 | G   | T  | -- | -- | Intron | SNP | 0.106 | 84  | 10 |
| TPTE       | chr21 | 10937864 | G   | A  | -- | -- | Intron | SNP | 0.115 | 54  | 7  |
| TPTE       | chr21 | 10957950 | A   | G  | -- | -- | Intron | SNP | 0.138 | 56  | 9  |
| TPTE       | chr21 | 10958143 | A   | G  | -- | -- | Intron | SNP | 0.102 | 79  | 9  |
| TPTE       | chr21 | 10960565 | T   | C  | -- | -- | Intron | SNP | 0.283 | 38  | 15 |
| BAGE2,BAGE | chr21 | 11028877 | C   | A  | -- | -- | Intron | SNP | 0.617 | 23  | 37 |
| ANKRD30BP2 | chr21 | 14413781 | A   | G  | -- | -- | RNA    | SNP | 0.208 | 19  | 5  |
| ANKRD30BP2 | chr21 | 14448739 | G   | A  | -- | -- | RNA    | SNP | 0.533 | 7   | 8  |
| ANKRD30BP2 | chr21 | 14458566 | A   | C  | -- | -- | RNA    | SNP | 0.600 | 2   | 3  |
| ANKRD30BP2 | chr21 | 14459979 | G   | A  | -- | -- | RNA    | SNP | 0.750 | 3   | 9  |
| ANKRD30BP2 | chr21 | 14466121 | AAT | -  | -- | -- | RNA    | DEL | 0.125 | 14  | 2  |
| ANKRD30BP2 | chr21 | 14472886 | G   | A  | -- | -- | RNA    | SNP | 0.500 | 3   | 3  |
| ANKRD30BP2 | chr21 | 14478065 | G   | A  | -- | -- | RNA    | SNP | 0.600 | 2   | 3  |
| ANKRD30BP2 | chr21 | 14483600 | G   | A  | -- | -- | RNA    | SNP | 0.261 | 17  | 6  |
| --         | chr21 | 14500292 | G   | C  | -- | -- | IGR    | SNP | 0.600 | 4   | 6  |
| --         | chr21 | 14514640 | T   | C  | -- | -- | IGR    | SNP | 0.667 | 2   | 4  |
| --         | chr21 | 14515763 | -   | GA | -- | -- | IGR    | INS | 0.111 | 16  | 2  |
| --         | chr21 | 14515786 | C   | T  | -- | -- | IGR    | SNP | 0.833 | 2   | 10 |
| --         | chr21 | 14518146 | C   | A  | -- | -- | IGR    | SNP | 0.286 | 5   | 2  |
| --         | chr21 | 14527186 | T   | G  | -- | -- | IGR    | SNP | 0.429 | 12  | 9  |
| --         | chr21 | 14559173 | G   | C  | -- | -- | IGR    | SNP | 0.400 | 39  | 26 |
| --         | chr21 | 14561077 | C   | A  | -- | -- | IGR    | SNP | 0.907 | 5   | 49 |
| --         | chr21 | 14584618 | G   | A  | -- | -- | IGR    | SNP | 0.140 | 43  | 7  |
| --         | chr21 | 14650809 | G   | A  | -- | -- | IGR    | SNP | 0.116 | 38  | 5  |
| --         | chr21 | 14663473 | C   | T  | -- | -- | IGR    | SNP | 0.104 | 43  | 5  |

|                  |       |          |    |      |    |    |         |     |       |    |    |
|------------------|-------|----------|----|------|----|----|---------|-----|-------|----|----|
| --               | chr21 | 14773879 | T  | C    | -- | -- | IGR     | SNP | 0.132 | 33 | 5  |
| --               | chr21 | 14802339 | T  | C    | -- | -- | IGR     | SNP | 0.153 | 50 | 9  |
| --               | chr21 | 14862750 | A  | G    | -- | -- | IGR     | SNP | 0.313 | 11 | 5  |
| --               | chr21 | 14866239 | T  | C    | -- | -- | IGR     | SNP | 0.149 | 40 | 7  |
| --               | chr21 | 14872125 | T  | G    | -- | -- | IGR     | SNP | 0.140 | 37 | 6  |
| --               | chr21 | 14963308 | C  | T    | -- | -- | IGR     | SNP | 0.188 | 13 | 3  |
| --               | chr21 | 14975112 | G  | A    | -- | -- | IGR     | SNP | 0.200 | 16 | 4  |
| --               | chr21 | 14975116 | G  | A    | -- | -- | IGR     | SNP | 0.222 | 14 | 4  |
| --               | chr21 | 14979492 | -  | CT   | -- | -- | IGR     | INS | 0.125 | 14 | 2  |
| --               | chr21 | 15058756 | TC | -    | -- | -- | IGR     | DEL | 0.143 | 24 | 4  |
| --               | chr21 | 15059584 | A  | T    | -- | -- | IGR     | SNP | 0.382 | 21 | 13 |
| --               | chr21 | 15109940 | AT | -    | -- | -- | IGR     | DEL | 0.135 | 32 | 5  |
| --               | chr21 | 15127286 | A  | G    | -- | -- | IGR     | SNP | 0.115 | 23 | 3  |
| --               | chr21 | 15172840 | G  | A    | -- | -- | IGR     | SNP | 0.872 | 6  | 41 |
| --               | chr21 | 15208228 | A  | G    | -- | -- | IGR     | SNP | 0.160 | 21 | 4  |
| --               | chr21 | 15230595 | C  | T    | -- | -- | IGR     | SNP | 0.208 | 19 | 5  |
| --               | chr21 | 15230841 | T  | C    | -- | -- | IGR     | SNP | 0.100 | 27 | 3  |
| --               | chr21 | 15279094 | G  | T    | -- | -- | IGR     | SNP | 0.775 | 9  | 31 |
| --               | chr21 | 15283937 | C  | T    | -- | -- | IGR     | SNP | 0.250 | 12 | 4  |
| --               | chr21 | 15283972 | C  | T    | -- | -- | IGR     | SNP | 0.364 | 7  | 4  |
| <i>C21orf81</i>  | chr21 | 15315681 | T  | C    | -- | -- | 3'Flank | SNP | 0.133 | 39 | 6  |
| <i>C21orf81</i>  | chr21 | 15315729 | G  | A    | -- | -- | 3'Flank | SNP | 0.179 | 23 | 5  |
| <i>C21orf81</i>  | chr21 | 15339879 | T  | G    | -- | -- | RNA     | SNP | 0.222 | 35 | 10 |
| <i>C21orf81</i>  | chr21 | 15344737 | -  | AT   | -- | -- | RNA     | INS | 0.120 | 22 | 3  |
| <i>C21orf81</i>  | chr21 | 15345795 | C  | T    | -- | -- | RNA     | SNP | 0.196 | 37 | 9  |
| <i>C21orf81</i>  | chr21 | 15345796 | C  | A    | -- | -- | RNA     | SNP | 0.196 | 37 | 9  |
| <i>C21orf81</i>  | chr21 | 15345935 | A  | T    | -- | -- | RNA     | SNP | 0.323 | 21 | 10 |
| <i>C21orf81</i>  | chr21 | 15350569 | -  | AAT  | -- | -- | RNA     | INS | 0.103 | 26 | 3  |
| --               | chr21 | 15437798 | C  | A    | -- | -- | IGR     | SNP | 0.174 | 19 | 4  |
| --               | chr21 | 16057823 | T  | A    | -- | -- | IGR     | SNP | 0.300 | 28 | 12 |
| <i>NRIP1</i>     | chr21 | 16390473 | G  | C    | -- | -- | Intron  | SNP | 0.852 | 4  | 23 |
| --               | chr21 | 16492219 | A  | G    | -- | -- | IGR     | SNP | 0.161 | 26 | 5  |
| --               | chr21 | 16551939 | T  | A    | -- | -- | IGR     | SNP | 0.235 | 13 | 4  |
| --               | chr21 | 16566995 | T  | A    | -- | -- | IGR     | SNP | 0.292 | 34 | 14 |
| --               | chr21 | 16711293 | G  | C    | -- | -- | IGR     | SNP | 0.815 | 5  | 22 |
| --               | chr21 | 16843155 | G  | A    | -- | -- | IGR     | SNP | 0.148 | 23 | 4  |
| --               | chr21 | 17313678 | C  | G    | -- | -- | IGR     | SNP | 0.183 | 58 | 13 |
| --               | chr21 | 17425642 | G  | T    | -- | -- | IGR     | SNP | 0.289 | 27 | 11 |
| <i>LINC00478</i> | chr21 | 17551245 | -  | AG   | -- | -- | RNA     | INS | 0.270 | 27 | 10 |
| <i>LINC00478</i> | chr21 | 17723838 | C  | T    | -- | -- | RNA     | SNP | 0.818 | 4  | 18 |
| --               | chr21 | 18012723 | C  | T    | -- | -- | IGR     | SNP | 0.176 | 28 | 6  |
| --               | chr21 | 18028868 | A  | G    | -- | -- | IGR     | SNP | 0.727 | 9  | 24 |
| --               | chr21 | 18191302 | C  | A    | -- | -- | IGR     | SNP | 0.786 | 6  | 22 |
| --               | chr21 | 18232787 | G  | A    | -- | -- | IGR     | SNP | 0.829 | 6  | 29 |
| --               | chr21 | 18579171 | A  | T    | -- | -- | IGR     | SNP | 0.875 | 5  | 35 |
| --               | chr21 | 19268737 | A  | T    | -- | -- | IGR     | SNP | 0.875 | 4  | 28 |
| <i>CHODL</i>     | chr21 | 19463099 | G  | A    | -- | -- | Intron  | SNP | 0.808 | 5  | 21 |
| <i>CHODL</i>     | chr21 | 19518470 | A  | T    | -- | -- | Intron  | SNP | 0.286 | 10 | 4  |
| <i>CHODL</i>     | chr21 | 19537853 | G  | A    | -- | -- | Intron  | SNP | 0.238 | 32 | 10 |
| <i>TMPRSS15</i>  | chr21 | 19774291 | A  | G    | -- | -- | Intron  | SNP | 0.292 | 17 | 7  |
| --               | chr21 | 19903781 | A  | T    | -- | -- | IGR     | SNP | 0.143 | 18 | 3  |
| --               | chr21 | 19990063 | G  | C    | -- | -- | IGR     | SNP | 0.970 | 1  | 32 |
| --               | chr21 | 19998659 | G  | A    | -- | -- | IGR     | SNP | 0.344 | 21 | 11 |
| --               | chr21 | 20126444 | C  | G    | -- | -- | IGR     | SNP | 0.297 | 26 | 11 |
| --               | chr21 | 20228270 | A  | T    | -- | -- | IGR     | SNP | 0.163 | 36 | 7  |
| --               | chr21 | 20245488 | G  | C    | -- | -- | IGR     | SNP | 0.400 | 6  | 4  |
| --               | chr21 | 20277888 | A  | C    | -- | -- | IGR     | SNP | 0.853 | 5  | 29 |
| --               | chr21 | 20328404 | A  | G    | -- | -- | IGR     | SNP | 0.222 | 21 | 6  |
| --               | chr21 | 20479430 | -  | GAAT | -- | -- | IGR     | INS | 0.125 | 14 | 2  |
| --               | chr21 | 20509787 | A  | G    | -- | -- | IGR     | SNP | 0.848 | 5  | 28 |
| --               | chr21 | 20537092 | C  | T    | -- | -- | IGR     | SNP | 0.886 | 4  | 31 |
| --               | chr21 | 20933620 | A  | T    | -- | -- | IGR     | SNP | 0.222 | 14 | 4  |
| --               | chr21 | 21032882 | CA | -    | -- | -- | IGR     | DEL | 0.200 | 28 | 7  |
| --               | chr21 | 21082122 | T  | C    | -- | -- | IGR     | SNP | 0.931 | 2  | 27 |
| --               | chr21 | 21160594 | A  | C    | -- | -- | IGR     | SNP | 0.909 | 3  | 30 |
| --               | chr21 | 21226325 | G  | A    | -- | -- | IGR     | SNP | 0.111 | 56 | 7  |
| --               | chr21 | 21301802 | G  | C    | -- | -- | IGR     | SNP | 0.190 | 34 | 8  |
| --               | chr21 | 21376534 | A  | T    | -- | -- | IGR     | SNP | 0.259 | 20 | 7  |
| --               | chr21 | 21616413 | C  | T    | -- | -- | IGR     | SNP | 0.625 | 3  | 5  |
| --               | chr21 | 21631369 | C  | T    | -- | -- | IGR     | SNP | 0.280 | 36 | 14 |
| --               | chr21 | 22059050 | G  | C    | -- | -- | IGR     | SNP | 0.923 | 1  | 12 |
| --               | chr21 | 22360988 | A  | G    | -- | -- | IGR     | SNP | 0.161 | 26 | 5  |
| --               | chr21 | 22360989 | A  | G    | -- | -- | IGR     | SNP | 0.161 | 26 | 5  |
| <i>NCAM2</i>     | chr21 | 22490193 | G  | C    | -- | -- | Intron  | SNP | 0.182 | 36 | 8  |
| --               | chr21 | 22975254 | C  | T    | -- | -- | IGR     | SNP | 0.351 | 24 | 13 |
| --               | chr21 | 23069347 | C  | T    | -- | -- | IGR     | SNP | 0.300 | 14 | 6  |
| --               | chr21 | 23860274 | T  | G    | -- | -- | IGR     | SNP | 0.892 | 4  | 33 |
| --               | chr21 | 24089642 | G  | A    | -- | -- | IGR     | SNP | 0.878 | 5  | 36 |
| --               | chr21 | 24178352 | T  | G    | -- | -- | IGR     | SNP | 0.333 | 24 | 12 |
| --               | chr21 | 24682979 | G  | T    | -- | -- | IGR     | SNP | 0.278 | 26 | 10 |



|                  |       |          |       |   |    |    |         |     |       |    |    |
|------------------|-------|----------|-------|---|----|----|---------|-----|-------|----|----|
| <i>D21S2088E</i> | chr21 | 24732957 | T     | C | -- | -- | 3'Flank | SNP | 0.425 | 23 | 17 |
| --               | chr21 | 24773695 | G     | A | -- | -- | IGR     | SNP | 0.182 | 18 | 4  |
| --               | chr21 | 24791021 | T     | A | -- | -- | IGR     | SNP | 0.211 | 30 | 8  |
| --               | chr21 | 24995970 | G     | T | -- | -- | IGR     | SNP | 0.920 | 2  | 23 |
| --               | chr21 | 24997055 | AAT   | - | -- | -- | IGR     | DEL | 0.115 | 23 | 3  |
| --               | chr21 | 25287559 | C     | T | -- | -- | IGR     | SNP | 0.917 | 2  | 22 |
| --               | chr21 | 25287572 | G     | C | -- | -- | IGR     | SNP | 0.913 | 2  | 21 |
| --               | chr21 | 25361929 | G     | T | -- | -- | IGR     | SNP | 0.531 | 15 | 17 |
| --               | chr21 | 25419241 | T     | A | -- | -- | IGR     | SNP | 0.304 | 16 | 7  |
| --               | chr21 | 25475975 | T     | C | -- | -- | IGR     | SNP | 0.900 | 4  | 36 |
| --               | chr21 | 25477580 | A     | T | -- | -- | IGR     | SNP | 0.320 | 17 | 8  |
| --               | chr21 | 25493698 | A     | T | -- | -- | IGR     | SNP | 0.308 | 9  | 4  |
| --               | chr21 | 25825993 | C     | A | -- | -- | IGR     | SNP | 0.233 | 23 | 7  |
| --               | chr21 | 26164334 | A     | G | -- | -- | IGR     | SNP | 0.261 | 17 | 6  |
| --               | chr21 | 26202836 | G     | C | -- | -- | IGR     | SNP | 0.382 | 21 | 13 |
| --               | chr21 | 26399490 | A     | C | -- | -- | IGR     | SNP | 0.881 | 5  | 37 |
| --               | chr21 | 26439065 | A     | G | -- | -- | IGR     | SNP | 0.150 | 34 | 6  |
| --               | chr21 | 26639497 | A     | C | -- | -- | IGR     | SNP | 0.205 | 35 | 9  |
| --               | chr21 | 26719669 | G     | A | -- | -- | IGR     | SNP | 0.182 | 27 | 6  |
| --               | chr21 | 26721539 | A     | G | -- | -- | IGR     | SNP | 0.941 | 1  | 16 |
| <i>LINC00158</i> | chr21 | 26765403 | G     | A | -- | -- | RNA     | SNP | 0.385 | 24 | 15 |
| <i>MRPL39</i>    | chr21 | 26958468 | T     | A | -- | -- | Intron  | SNP | 0.286 | 20 | 8  |
| <i>APP</i>       | chr21 | 27371025 | G     | C | -- | -- | Intron  | SNP | 0.906 | 3  | 29 |
| --               | chr21 | 27707753 | T     | A | -- | -- | IGR     | SNP | 0.143 | 24 | 4  |
| <i>CYYR1</i>     | chr21 | 27918286 | G     | C | -- | -- | Intron  | SNP | 0.962 | 2  | 51 |
| --               | chr21 | 28048352 | T     | A | -- | -- | IGR     | SNP | 0.228 | 44 | 13 |
| --               | chr21 | 28074006 | C     | A | -- | -- | IGR     | SNP | 0.360 | 32 | 18 |
| --               | chr21 | 28442762 | G     | A | -- | -- | IGR     | SNP | 0.364 | 7  | 4  |
| --               | chr21 | 28469307 | G     | T | -- | -- | IGR     | SNP | 0.246 | 49 | 16 |
| --               | chr21 | 28739778 | G     | A | -- | -- | IGR     | SNP | 0.883 | 7  | 53 |
| --               | chr21 | 28748587 | C     | G | -- | -- | IGR     | SNP | 0.170 | 44 | 9  |
| --               | chr21 | 28805808 | T     | C | -- | -- | IGR     | SNP | 0.294 | 12 | 5  |
| --               | chr21 | 28841791 | G     | C | -- | -- | IGR     | SNP | 0.867 | 6  | 39 |
| --               | chr21 | 28942589 | G     | A | -- | -- | IGR     | SNP | 0.179 | 46 | 10 |
| --               | chr21 | 29091510 | T     | C | -- | -- | IGR     | SNP | 0.122 | 36 | 5  |
| --               | chr21 | 29160348 | A     | G | -- | -- | IGR     | SNP | 0.196 | 45 | 11 |
| --               | chr21 | 29217953 | C     | T | -- | -- | IGR     | SNP | 0.109 | 49 | 6  |
| --               | chr21 | 29271880 | C     | A | -- | -- | IGR     | SNP | 0.100 | 36 | 4  |
| --               | chr21 | 29275899 | C     | T | -- | -- | IGR     | SNP | 0.175 | 33 | 7  |
| --               | chr21 | 29300196 | G     | T | -- | -- | IGR     | SNP | 0.162 | 31 | 6  |
| --               | chr21 | 29350457 | A     | T | -- | -- | IGR     | SNP | 0.148 | 23 | 4  |
| --               | chr21 | 29892237 | T     | C | -- | -- | IGR     | SNP | 0.140 | 43 | 7  |
| --               | chr21 | 29917729 | A     | T | -- | -- | IGR     | SNP | 0.131 | 53 | 8  |
| <i>LINC00189</i> | chr21 | 30576032 | A     | T | -- | -- | RNA     | SNP | 0.229 | 37 | 11 |
| <i>LINC00189</i> | chr21 | 30582994 | T     | A | -- | -- | RNA     | SNP | 0.917 | 5  | 55 |
| <i>LINC00189</i> | chr21 | 30642954 | T     | C | -- | -- | RNA     | SNP | 0.137 | 44 | 7  |
| --               | chr21 | 30736892 | G     | A | -- | -- | IGR     | SNP | 0.197 | 49 | 12 |
| --               | chr21 | 30803453 | A     | C | -- | -- | IGR     | SNP | 0.200 | 20 | 5  |
| <i>GRIK1</i>     | chr21 | 31028710 | G     | A | -- | -- | Intron  | SNP | 0.176 | 14 | 3  |
| <i>GRIK1</i>     | chr21 | 31104665 | A     | G | -- | -- | Intron  | SNP | 0.255 | 35 | 12 |
| --               | chr21 | 31390235 | C     | A | -- | -- | IGR     | SNP | 0.907 | 4  | 39 |
| --               | chr21 | 31440565 | T     | C | -- | -- | IGR     | SNP | 0.154 | 33 | 6  |
| --               | chr21 | 31775332 | T     | A | -- | -- | IGR     | SNP | 0.296 | 19 | 8  |
| --               | chr21 | 31856145 | G     | C | -- | -- | IGR     | SNP | 0.968 | 1  | 30 |
| --               | chr21 | 32083006 | G     | A | -- | -- | IGR     | SNP | 0.296 | 38 | 16 |
| --               | chr21 | 32403448 | C     | T | -- | -- | IGR     | SNP | 0.158 | 16 | 3  |
| <i>TIAM1</i>     | chr21 | 32599798 | C     | G | -- | -- | Intron  | SNP | 0.339 | 41 | 21 |
| <i>TIAM1</i>     | chr21 | 32599837 | A     | T | -- | -- | Intron  | SNP | 0.281 | 46 | 18 |
| <i>TIAM1</i>     | chr21 | 32600035 | C     | G | -- | -- | Intron  | SNP | 0.143 | 36 | 6  |
| <i>TIAM1</i>     | chr21 | 32677737 | AT    | - | -- | -- | Intron  | DEL | 0.143 | 24 | 4  |
| <i>TIAM1</i>     | chr21 | 32741554 | G     | A | -- | -- | Intron  | SNP | 0.160 | 21 | 4  |
| <i>TIAM1</i>     | chr21 | 32842333 | C     | T | -- | -- | Intron  | SNP | 0.250 | 15 | 5  |
| <i>TIAM1</i>     | chr21 | 32920437 | A     | T | -- | -- | Intron  | SNP | 0.129 | 27 | 4  |
| --               | chr21 | 33391737 | A     | T | -- | -- | IGR     | SNP | 0.212 | 26 | 7  |
| --               | chr21 | 33559601 | T     | A | -- | -- | IGR     | SNP | 0.150 | 34 | 6  |
| --               | chr21 | 33624415 | T     | A | -- | -- | IGR     | SNP | 0.286 | 10 | 4  |
| <i>MIS18A</i>    | chr21 | 33651809 | A     | G | -- | -- | 5'Flank | SNP | 0.217 | 18 | 5  |
| <i>URB1</i>      | chr21 | 33729391 | G     | A | -- | -- | Intron  | SNP | 0.237 | 45 | 14 |
| <i>IFNAR1</i>    | chr21 | 34722827 | A     | C | -- | -- | Intron  | SNP | 0.849 | 8  | 45 |
| <i>IFNGR2</i>    | chr21 | 34799085 | CTA   | - | -- | -- | Intron  | DEL | 0.111 | 16 | 2  |
| <i>ITSN1</i>     | chr21 | 35252253 | G     | C | -- | -- | Intron  | SNP | 0.198 | 69 | 17 |
| --               | chr21 | 35298756 | GTTGT | - | -- | -- | IGR     | DEL | 0.118 | 15 | 2  |
| --               | chr21 | 35425223 | A     | G | -- | -- | IGR     | SNP | 0.163 | 36 | 7  |
| --               | chr21 | 35574688 | C     | G | -- | -- | IGR     | SNP | 0.216 | 29 | 8  |
| <i>RUNX1</i>     | chr21 | 36366037 | G     | C | -- | -- | Intron  | SNP | 0.114 | 39 | 5  |
| --               | chr21 | 36621897 | A     | T | -- | -- | IGR     | SNP | 0.256 | 29 | 10 |
| --               | chr21 | 36776670 | C     | T | -- | -- | IGR     | SNP | 0.247 | 55 | 18 |
| --               | chr21 | 36776723 | AC    | - | -- | -- | IGR     | DEL | 0.205 | 58 | 15 |
| --               | chr21 | 36776849 | C     | A | -- | -- | IGR     | SNP | 0.192 | 59 | 14 |
| --               | chr21 | 36776853 | C     | T | -- | -- | IGR     | SNP | 0.200 | 60 | 15 |

|           |       |          |    |        |        |       |        |     |       |    |    |
|-----------|-------|----------|----|--------|--------|-------|--------|-----|-------|----|----|
| --        | chr21 | 36777128 | C  | T      | --     | --    | IGR    | SNP | 0.181 | 68 | 15 |
| --        | chr21 | 36778295 | C  | G      | --     | --    | IGR    | SNP | 0.193 | 67 | 16 |
| --        | chr21 | 36779315 | C  | T      | --     | --    | IGR    | SNP | 0.333 | 42 | 21 |
| --        | chr21 | 36780091 | C  | T      | --     | --    | IGR    | SNP | 0.145 | 59 | 10 |
| --        | chr21 | 36780483 | C  | T      | --     | --    | IGR    | SNP | 0.181 | 59 | 13 |
| --        | chr21 | 36966780 | C  | T      | --     | --    | IGR    | SNP | 0.481 | 28 | 26 |
| --        | chr21 | 37125592 | A  | G      | --     | --    | IGR    | SNP | 0.362 | 44 | 25 |
| --        | chr21 | 37189023 | G  | C      | --     | --    | IGR    | SNP | 0.219 | 50 | 14 |
| --        | chr21 | 37347514 | G  | T      | --     | --    | IGR    | SNP | 0.160 | 21 | 4  |
| DOPEY2    | chr21 | 37550790 | G  | A      | --     | --    | Intron | SNP | 0.200 | 40 | 10 |
| DOPEY2    | chr21 | 37635354 | G  | A      | --     | --    | Intron | SNP | 0.906 | 3  | 29 |
| MORC3     | chr21 | 37747462 | A  | T      | A2688T | R896R | Silent | SNP | 0.193 | 46 | 11 |
| CHAF1B    | chr21 | 37761921 | T  | A      | --     | --    | Intron | SNP | 0.349 | 28 | 15 |
| --        | chr21 | 37828670 | C  | G      | --     | --    | IGR    | SNP | 0.345 | 36 | 19 |
| --        | chr21 | 38016790 | C  | T      | --     | --    | IGR    | SNP | 0.227 | 17 | 5  |
| HLCS      | chr21 | 38330851 | G  | C      | --     | --    | Intron | SNP | 0.217 | 36 | 10 |
| HLCS      | chr21 | 38349448 | G  | A      | --     | --    | Intron | SNP | 0.896 | 5  | 43 |
| --        | chr21 | 38732122 | C  | A      | --     | --    | IGR    | SNP | 0.148 | 23 | 4  |
| --        | chr21 | 38737975 | G  | C      | --     | --    | IGR    | SNP | 0.233 | 56 | 17 |
| KCNJ6     | chr21 | 39022239 | TG | -      | --     | --    | Intron | DEL | 0.102 | 44 | 5  |
| KCNJ6     | chr21 | 39129799 | G  | A      | --     | --    | Intron | SNP | 0.173 | 62 | 13 |
| KCNJ6     | chr21 | 39154520 | AG | -      | --     | --    | Intron | DEL | 0.130 | 67 | 10 |
| KCNJ6     | chr21 | 39204777 | G  | T      | --     | --    | Intron | SNP | 0.147 | 64 | 11 |
| --        | chr21 | 39421780 | G  | A      | --     | --    | IGR    | SNP | 0.870 | 7  | 47 |
| ERG       | chr21 | 39883158 | G  | C      | --     | --    | Intron | SNP | 0.928 | 5  | 64 |
| ERG       | chr21 | 39934796 | C  | T      | --     | --    | Intron | SNP | 0.185 | 44 | 10 |
| LINC00114 | chr21 | 40115571 | C  | T      | --     | --    | RNA    | SNP | 0.158 | 85 | 16 |
| LINC00114 | chr21 | 40127227 | C  | T      | --     | --    | RNA    | SNP | 0.157 | 86 | 16 |
| LINC00114 | chr21 | 40127232 | C  | T      | --     | --    | RNA    | SNP | 0.162 | 83 | 16 |
| --        | chr21 | 40350145 | A  | T      | --     | --    | IGR    | SNP | 0.213 | 48 | 13 |
| SH3BGR    | chr21 | 40825894 | G  | A      | --     | --    | Intron | SNP | 0.948 | 5  | 92 |
| SH3BGR    | chr21 | 40874544 | G  | C      | --     | --    | Intron | SNP | 0.349 | 28 | 15 |
| SH3BGR    | chr21 | 40875485 | G  | C      | --     | --    | Intron | SNP | 0.466 | 47 | 41 |
| SH3BGR    | chr21 | 40883345 | G  | T      | --     | --    | Intron | SNP | 0.244 | 68 | 22 |
| --        | chr21 | 41303465 | G  | C      | --     | --    | IGR    | SNP | 0.364 | 28 | 16 |
| DSCAM     | chr21 | 41456478 | C  | A      | --     | --    | Intron | SNP | 0.188 | 13 | 3  |
| DSCAM     | chr21 | 41489598 | G  | T      | --     | --    | Intron | SNP | 0.179 | 55 | 12 |
| DSCAM     | chr21 | 41489651 | G  | A      | --     | --    | Intron | SNP | 0.526 | 27 | 30 |
| DSCAM     | chr21 | 41489768 | G  | T      | --     | --    | Intron | SNP | 0.378 | 46 | 28 |
| DSCAM     | chr21 | 41489921 | G  | C      | --     | --    | Intron | SNP | 0.471 | 37 | 33 |
| DSCAM     | chr21 | 41699957 | G  | C      | --     | --    | Intron | SNP | 0.118 | 45 | 6  |
| DSCAM     | chr21 | 41732673 | G  | C      | --     | --    | Intron | SNP | 0.930 | 5  | 66 |
| DSCAM     | chr21 | 41991769 | AG | -      | --     | --    | Intron | DEL | 0.103 | 26 | 3  |
| --        | chr21 | 42385805 | G  | T      | --     | --    | IGR    | SNP | 0.206 | 54 | 14 |
| BACE2     | chr21 | 42646565 | G  | T      | --     | --    | Intron | SNP | 0.135 | 45 | 7  |
| --        | chr21 | 42674706 | T  | G      | --     | --    | IGR    | SNP | 0.211 | 60 | 16 |
| FAM3B     | chr21 | 42695459 | C  | T      | --     | --    | Intron | SNP | 0.130 | 80 | 12 |
| C2CD2     | chr21 | 43349227 | T  | A      | --     | --    | Intron | SNP | 0.194 | 54 | 13 |
| UMODL1    | chr21 | 43501810 | C  | T      | --     | --    | Intron | SNP | 0.118 | 60 | 8  |
| --        | chr21 | 43779510 | -  | TTTTTC | --     | --    | IGR    | INS | 0.111 | 32 | 4  |
| UBASH3A   | chr21 | 43840747 | A  | T      | --     | --    | Intron | SNP | 0.127 | 55 | 8  |
| PDE9A     | chr21 | 44126164 | C  | T      | --     | --    | Intron | SNP | 0.141 | 55 | 9  |
| --        | chr21 | 44366628 | G  | C      | --     | --    | IGR    | SNP | 0.226 | 65 | 19 |
| --        | chr21 | 44900028 | C  | T      | --     | --    | IGR    | SNP | 0.837 | 8  | 41 |
| PWP2      | chr21 | 45550708 | G  | A      | --     | --    | 3'UTR  | SNP | 0.917 | 6  | 66 |
| TRPM2     | chr21 | 45824780 | T  | C      | --     | --    | Intron | SNP | 0.444 | 40 | 32 |
| --        | chr21 | 45906134 | C  | T      | --     | --    | IGR    | SNP | 0.122 | 79 | 11 |
| --        | chr21 | 45906150 | C  | T      | --     | --    | IGR    | SNP | 0.162 | 83 | 16 |
| --        | chr21 | 45911271 | C  | T      | --     | --    | IGR    | SNP | 0.154 | 44 | 8  |
| --        | chr21 | 45911275 | A  | G      | --     | --    | IGR    | SNP | 0.167 | 45 | 9  |
| SUMO3     | chr21 | 46226346 | C  | T      | --     | --    | 3'UTR  | SNP | 0.188 | 39 | 9  |
| PTTG1IP   | chr21 | 46275849 | C  | T      | --     | --    | Intron | SNP | 0.891 | 12 | 98 |
| --        | chr21 | 46303686 | G  | T      | --     | --    | IGR    | SNP | 0.130 | 40 | 6  |
| C21orf67  | chr21 | 46354842 | A  | C      | --     | --    | RNA    | SNP | 0.114 | 70 | 9  |
| --        | chr21 | 46401653 | -  | AG     | --     | --    | IGR    | INS | 0.122 | 36 | 5  |
| --        | chr21 | 46489681 | C  | T      | --     | --    | IGR    | SNP | 0.119 | 96 | 13 |
| --        | chr21 | 46765610 | T  | A      | --     | --    | IGR    | SNP | 0.375 | 25 | 15 |
| COL18A1   | chr21 | 46859983 | C  | T      | --     | --    | Intron | SNP | 0.916 | 7  | 76 |
| SLC19A1   | chr21 | 46947369 | A  | G      | --     | --    | Intron | SNP | 0.121 | 29 | 4  |
| --        | chr21 | 47000971 | C  | T      | --     | --    | IGR    | SNP | 0.165 | 66 | 13 |
| --        | chr21 | 47236832 | A  | T      | --     | --    | IGR    | SNP | 0.161 | 26 | 5  |
| --        | chr21 | 47442955 | C  | T      | --     | --    | IGR    | SNP | 0.949 | 2  | 37 |
| COL6A2    | chr21 | 47548791 | T  | C      | --     | --    | Intron | SNP | 0.143 | 24 | 4  |
| YBEY      | chr21 | 47714277 | C  | T      | --     | --    | Intron | SNP | 0.167 | 20 | 4  |
| --        | chr22 | 16069562 | C  | T      | --     | --    | IGR    | SNP | 0.103 | 35 | 4  |
| --        | chr22 | 16077136 | G  | T      | --     | --    | IGR    | SNP | 0.132 | 33 | 5  |
| --        | chr22 | 16077327 | G  | T      | --     | --    | IGR    | SNP | 0.116 | 38 | 5  |
| --        | chr22 | 16083393 | A  | C      | --     | --    | IGR    | SNP | 0.143 | 30 | 5  |
| --        | chr22 | 16083433 | G  | A      | --     | --    | IGR    | SNP | 0.128 | 34 | 5  |
| --        | chr22 | 16084026 | G  | A      | --     | --    | IGR    | SNP | 0.211 | 15 | 4  |

|                  |       |          |       |       |    |    |         |     |       |    |    |
|------------------|-------|----------|-------|-------|----|----|---------|-----|-------|----|----|
| --               | chr22 | 16084057 | TA    | -     | -- | -- | IGR     | DEL | 0.235 | 13 | 4  |
| --               | chr22 | 16091684 | G     | C     | -- | -- | IGR     | SNP | 0.184 | 31 | 7  |
| --               | chr22 | 16147968 | A     | C     | -- | -- | IGR     | SNP | 0.152 | 39 | 7  |
| --               | chr22 | 16223888 | G     | T     | -- | -- | IGR     | SNP | 0.200 | 16 | 4  |
| --               | chr22 | 16237024 | -     | CTCT  | -- | -- | IGR     | INS | 0.500 | 8  | 8  |
| --               | chr22 | 16237056 | -     | TC    | -- | -- | IGR     | INS | 0.571 | 6  | 8  |
| --               | chr22 | 16239538 | C     | A     | -- | -- | IGR     | SNP | 0.218 | 68 | 19 |
| --               | chr22 | 16298000 | C     | T     | -- | -- | IGR     | SNP | 0.370 | 17 | 10 |
| --               | chr22 | 16351996 | C     | G     | -- | -- | IGR     | SNP | 0.167 | 40 | 8  |
| --               | chr22 | 16367659 | A     | G     | -- | -- | IGR     | SNP | 0.286 | 10 | 4  |
| --               | chr22 | 16368669 | T     | A     | -- | -- | IGR     | SNP | 0.286 | 10 | 4  |
| --               | chr22 | 16389825 | C     | G     | -- | -- | IGR     | SNP | 0.250 | 18 | 6  |
| --               | chr22 | 16414079 | G     | A     | -- | -- | IGR     | SNP | 0.192 | 21 | 5  |
| --               | chr22 | 16439811 | T     | C     | -- | -- | IGR     | SNP | 0.357 | 9  | 5  |
| --               | chr22 | 16439817 | C     | T     | -- | -- | IGR     | SNP | 0.357 | 9  | 5  |
| --               | chr22 | 16865406 | T     | G     | -- | -- | IGR     | SNP | 0.286 | 15 | 6  |
| --               | chr22 | 16866352 | C     | T     | -- | -- | IGR     | SNP | 0.150 | 17 | 3  |
| --               | chr22 | 16881494 | A     | C     | -- | -- | IGR     | SNP | 0.250 | 12 | 4  |
| --               | chr22 | 16885486 | T     | G     | -- | -- | IGR     | SNP | 0.219 | 25 | 7  |
| --               | chr22 | 16926744 | -     | CA    | -- | -- | IGR     | INS | 0.115 | 23 | 3  |
| --               | chr22 | 16938961 | AAT   | -     | -- | -- | IGR     | DEL | 0.233 | 23 | 7  |
| --               | chr22 | 16943101 | T     | C     | -- | -- | IGR     | SNP | 0.109 | 41 | 5  |
| --               | chr22 | 16943463 | A     | G     | -- | -- | IGR     | SNP | 0.207 | 23 | 6  |
| --               | chr22 | 16944842 | G     | A     | -- | -- | IGR     | SNP | 0.163 | 36 | 7  |
| --               | chr22 | 16953165 | -     | TTTGC | -- | -- | IGR     | INS | 0.111 | 16 | 2  |
| --               | chr22 | 16954206 | A     | G     | -- | -- | IGR     | SNP | 0.158 | 32 | 6  |
| --               | chr22 | 16963486 | C     | T     | -- | -- | IGR     | SNP | 0.121 | 29 | 4  |
| --               | chr22 | 16963501 | G     | A     | -- | -- | IGR     | SNP | 0.160 | 21 | 4  |
| --               | chr22 | 16965599 | T     | C     | -- | -- | IGR     | SNP | 0.265 | 25 | 9  |
| --               | chr22 | 16993290 | G     | A     | -- | -- | IGR     | SNP | 0.171 | 29 | 6  |
| --               | chr22 | 16999085 | A     | G     | -- | -- | IGR     | SNP | 0.132 | 46 | 7  |
| --               | chr22 | 17010015 | T     | C     | -- | -- | IGR     | SNP | 0.113 | 47 | 6  |
| --               | chr22 | 17011597 | T     | C     | -- | -- | IGR     | SNP | 0.162 | 31 | 6  |
| --               | chr22 | 17017328 | G     | T     | -- | -- | IGR     | SNP | 0.308 | 18 | 8  |
| --               | chr22 | 17017329 | T     | C     | -- | -- | IGR     | SNP | 0.308 | 18 | 8  |
| --               | chr22 | 17019243 | G     | A     | -- | -- | IGR     | SNP | 0.150 | 34 | 6  |
| --               | chr22 | 17020357 | T     | C     | -- | -- | IGR     | SNP | 0.150 | 17 | 3  |
| --               | chr22 | 17033932 | G     | A     | -- | -- | IGR     | SNP | 0.388 | 30 | 19 |
| --               | chr22 | 17036037 | G     | T     | -- | -- | IGR     | SNP | 0.119 | 37 | 5  |
| <i>psiTPTE22</i> | chr22 | 17110299 | A     | G     | -- | -- | RNA     | SNP | 0.154 | 22 | 4  |
| <i>psiTPTE22</i> | chr22 | 17122525 | C     | T     | -- | -- | RNA     | SNP | 0.100 | 27 | 3  |
| --               | chr22 | 17235378 | C     | T     | -- | -- | IGR     | SNP | 0.133 | 26 | 4  |
| --               | chr22 | 17247869 | GTCCC | -     | -- | -- | IGR     | DEL | 0.115 | 23 | 3  |
| --               | chr22 | 17350033 | GC    | -     | -- | -- | IGR     | DEL | 0.143 | 12 | 2  |
| --               | chr22 | 17363633 | A     | G     | -- | -- | IGR     | SNP | 0.500 | 5  | 5  |
| --               | chr22 | 17374563 | G     | A     | -- | -- | IGR     | SNP | 0.389 | 11 | 7  |
| --               | chr22 | 17378755 | -     | TTTGC | -- | -- | IGR     | INS | 0.306 | 25 | 11 |
| --               | chr22 | 17496159 | G     | A     | -- | -- | IGR     | SNP | 0.129 | 54 | 8  |
| --               | chr22 | 17497138 | A     | C     | -- | -- | IGR     | SNP | 0.114 | 31 | 4  |
| --               | chr22 | 17502942 | G     | A     | -- | -- | IGR     | SNP | 0.308 | 9  | 4  |
| --               | chr22 | 17507072 | T     | A     | -- | -- | IGR     | SNP | 0.217 | 18 | 5  |
| --               | chr22 | 17507440 | G     | T     | -- | -- | IGR     | SNP | 0.122 | 36 | 5  |
| --               | chr22 | 17508426 | TA    | -     | -- | -- | IGR     | DEL | 0.188 | 13 | 3  |
| --               | chr22 | 17552514 | G     | A     | -- | -- | IGR     | SNP | 0.857 | 3  | 18 |
| <i>CECR2</i>     | chr22 | 17961812 | G     | T     | -- | -- | Intron  | SNP | 0.222 | 14 | 4  |
| <i>SLC25A18</i>  | chr22 | 18048647 | G     | T     | -- | -- | Intron  | SNP | 0.500 | 3  | 3  |
| --               | chr22 | 18536377 | T     | C     | -- | -- | IGR     | SNP | 0.267 | 11 | 4  |
| --               | chr22 | 18721972 | -     | TC    | -- | -- | IGR     | INS | 0.176 | 14 | 3  |
| --               | chr22 | 18805643 | -     | AG    | -- | -- | IGR     | INS | 0.143 | 12 | 2  |
| --               | chr22 | 18860724 | C     | G     | -- | -- | IGR     | SNP | 0.167 | 15 | 3  |
| --               | chr22 | 18887332 | G     | A     | -- | -- | IGR     | SNP | 0.111 | 48 | 6  |
| --               | chr22 | 19291253 | T     | A     | -- | -- | IGR     | SNP | 0.360 | 16 | 9  |
| --               | chr22 | 19291254 | C     | A     | -- | -- | IGR     | SNP | 0.360 | 16 | 9  |
| --               | chr22 | 19714599 | A     | G     | -- | -- | IGR     | SNP | 0.133 | 39 | 6  |
| <i>TBX1</i>      | chr22 | 19765301 | G     | T     | -- | -- | Intron  | SNP | 0.267 | 11 | 4  |
| <i>C22orf25</i>  | chr22 | 20017980 | C     | G     | -- | -- | Intron  | SNP | 0.158 | 16 | 3  |
| <i>LOC284865</i> | chr22 | 20190596 | A     | G     | -- | -- | RNA     | SNP | 0.257 | 26 | 9  |
| --               | chr22 | 20297471 | T     | C     | -- | -- | IGR     | SNP | 0.281 | 23 | 9  |
| <i>TMEM191B</i>  | chr22 | 20377064 | G     | C     | -- | -- | 5'Flank | SNP | 0.588 | 14 | 20 |
| --               | chr22 | 20705223 | T     | G     | -- | -- | IGR     | SNP | 0.231 | 20 | 6  |
| --               | chr22 | 20765127 | C     | T     | -- | -- | IGR     | SNP | 0.375 | 10 | 6  |
| --               | chr22 | 20765132 | C     | T     | -- | -- | IGR     | SNP | 0.250 | 12 | 4  |
| --               | chr22 | 21051540 | G     | A     | -- | -- | IGR     | SNP | 0.182 | 18 | 4  |
| --               | chr22 | 21052826 | T     | G     | -- | -- | IGR     | SNP | 0.206 | 27 | 7  |
| <i>PI4KA</i>     | chr22 | 21148686 | T     | C     | -- | -- | Intron  | SNP | 0.161 | 26 | 5  |
| --               | chr22 | 21517394 | G     | A     | -- | -- | IGR     | SNP | 0.600 | 2  | 3  |
| --               | chr22 | 21536822 | A     | G     | -- | -- | IGR     | SNP | 0.310 | 20 | 9  |
| --               | chr22 | 21537891 | C     | G     | -- | -- | IGR     | SNP | 0.160 | 21 | 4  |
| --               | chr22 | 21538125 | C     | A     | -- | -- | IGR     | SNP | 0.154 | 33 | 6  |
| --               | chr22 | 21556211 | T     | C     | -- | -- | IGR     | SNP | 0.133 | 39 | 6  |

|              |       |          |       |     |    |    |        |     |       |    |    |
|--------------|-------|----------|-------|-----|----|----|--------|-----|-------|----|----|
| --           | chr22 | 21564179 | C     | T   | -- | -- | IGR    | SNP | 0.500 | 3  | 3  |
| UBE2L3       | chr22 | 21973522 | A     | T   | -- | -- | Intron | SNP | 0.314 | 24 | 11 |
| --           | chr22 | 22237455 | G     | A   | -- | -- | IGR    | SNP | 0.211 | 15 | 4  |
| --           | chr22 | 22532306 | AATAC | -   | -- | -- | IGR    | DEL | 0.111 | 16 | 2  |
| --           | chr22 | 22571912 | C     | T   | -- | -- | IGR    | SNP | 0.950 | 1  | 19 |
| --           | chr22 | 22610907 | T     | C   | -- | -- | IGR    | SNP | 0.196 | 41 | 10 |
| --           | chr22 | 22642878 | T     | C   | -- | -- | IGR    | SNP | 0.158 | 16 | 3  |
| LOC96610     | chr22 | 22653118 | -     | GA  | -- | -- | RNA    | INS | 0.154 | 22 | 4  |
| LOC96610     | chr22 | 22664606 | A     | G   | -- | -- | RNA    | SNP | 0.167 | 20 | 4  |
| --           | chr22 | 22971281 | -     | AG  | -- | -- | IGR    | INS | 0.106 | 42 | 5  |
| --           | chr22 | 22991656 | C     | T   | -- | -- | IGR    | SNP | 0.139 | 31 | 5  |
| --           | chr22 | 22991660 | G     | A   | -- | -- | IGR    | SNP | 0.111 | 32 | 4  |
| --           | chr22 | 23512851 | C     | T   | -- | -- | IGR    | SNP | 0.389 | 22 | 14 |
| --           | chr22 | 23680298 | T     | G   | -- | -- | IGR    | SNP | 0.882 | 2  | 15 |
| --           | chr22 | 23790926 | C     | G   | -- | -- | IGR    | SNP | 0.467 | 8  | 7  |
| --           | chr22 | 24111191 | G     | C   | -- | -- | IGR    | SNP | 0.162 | 31 | 6  |
| SMARCB1      | chr22 | 24141717 | G     | T   | -- | -- | Intron | SNP | 0.235 | 13 | 4  |
| SMARCB1      | chr22 | 24171791 | G     | A   | -- | -- | Intron | SNP | 0.276 | 21 | 8  |
| --           | chr22 | 24642816 | G     | A   | -- | -- | Intron | SNP | 0.160 | 21 | 4  |
| SPECC1L      | chr22 | 24671152 | A     | G   | -- | -- | Intron | SNP | 0.241 | 41 | 13 |
| C22orf36,GG1 | chr22 | 24986275 | T     | A   | -- | -- | Intron | SNP | 0.484 | 16 | 15 |
| GGT1         | chr22 | 25014295 | C     | T   | -- | -- | Intron | SNP | 0.103 | 26 | 3  |
| BCRP3        | chr22 | 25034775 | A     | G   | -- | -- | RNA    | SNP | 0.292 | 17 | 7  |
| POM121L10P   | chr22 | 25054729 | A     | T   | -- | -- | RNA    | SNP | 0.231 | 20 | 6  |
| POM121L10P   | chr22 | 25054733 | T     | G   | -- | -- | RNA    | SNP | 0.240 | 19 | 6  |
| POM121L10P   | chr22 | 25054741 | C     | G   | -- | -- | RNA    | SNP | 0.200 | 24 | 6  |
| --           | chr22 | 25057355 | G     | C   | -- | -- | IGR    | SNP | 0.417 | 7  | 5  |
| KIAA1671     | chr22 | 25555008 | G     | A   | -- | -- | Intron | SNP | 0.800 | 5  | 20 |
| --           | chr22 | 25647369 | C     | T   | -- | -- | IGR    | SNP | 0.333 | 8  | 4  |
| --           | chr22 | 25706422 | A     | C   | -- | -- | IGR    | SNP | 0.313 | 11 | 5  |
| --           | chr22 | 25929223 | -     | AC  | -- | -- | IGR    | INS | 0.119 | 37 | 5  |
| ADRBK2       | chr22 | 26106278 | CT    | -   | -- | -- | Intron | DEL | 0.824 | 6  | 28 |
| MYO18B       | chr22 | 26177596 | T     | G   | -- | -- | Intron | SNP | 0.375 | 5  | 3  |
| MYO18B       | chr22 | 26283936 | G     | T   | -- | -- | Intron | SNP | 0.344 | 21 | 11 |
| --           | chr22 | 27293617 | G     | C   | -- | -- | IGR    | SNP | 0.955 | 1  | 21 |
| --           | chr22 | 27698646 | A     | G   | -- | -- | IGR    | SNP | 0.100 | 36 | 4  |
| --           | chr22 | 27809834 | G     | C   | -- | -- | IGR    | SNP | 0.867 | 4  | 26 |
| --           | chr22 | 27930022 | G     | C   | -- | -- | IGR    | SNP | 0.586 | 12 | 17 |
| --           | chr22 | 28094785 | G     | A   | -- | -- | IGR    | SNP | 0.933 | 2  | 28 |
| TTC28        | chr22 | 28536351 | T     | A   | -- | -- | Intron | SNP | 0.100 | 27 | 3  |
| TTC28        | chr22 | 28674501 | C     | A   | -- | -- | Intron | SNP | 1.000 | 0  | 21 |
| TTC28        | chr22 | 28756712 | G     | T   | -- | -- | Intron | SNP | 0.806 | 7  | 29 |
| TTC28        | chr22 | 28949045 | G     | A   | -- | -- | Intron | SNP | 0.200 | 16 | 4  |
| TTC28        | chr22 | 29034491 | -     | CA  | -- | -- | Intron | INS | 0.417 | 14 | 10 |
| TTC28        | chr22 | 29072461 | C     | T   | -- | -- | Intron | SNP | 0.240 | 19 | 6  |
| --           | chr22 | 29077505 | G     | C   | -- | -- | IGR    | SNP | 0.231 | 10 | 3  |
| --           | chr22 | 29081744 | A     | C   | -- | -- | IGR    | SNP | 0.171 | 34 | 7  |
| --           | chr22 | 29082547 | T     | C   | -- | -- | IGR    | SNP | 0.143 | 24 | 4  |
| CHEK2        | chr22 | 29083859 | T     | C   | -- | -- | 3'UTR  | SNP | 0.208 | 19 | 5  |
| CCDC117      | chr22 | 29175532 | G     | A   | -- | -- | Intron | SNP | 0.897 | 3  | 26 |
| CCDC117      | chr22 | 29176751 | G     | A   | -- | -- | Intron | SNP | 0.970 | 1  | 32 |
| CCDC117      | chr22 | 29177271 | G     | C   | -- | -- | Intron | SNP | 0.895 | 2  | 17 |
| AP1B1        | chr22 | 29771847 | -     | CTA | -- | -- | Intron | INS | 0.767 | 10 | 33 |
| --           | chr22 | 29858635 | G     | A   | -- | -- | IGR    | SNP | 0.860 | 6  | 37 |
| MTMR3        | chr22 | 30422136 | C     | T   | -- | -- | 3'UTR  | SNP | 0.371 | 22 | 13 |
| HORMAD2      | chr22 | 30531710 | G     | T   | -- | -- | Intron | SNP | 0.125 | 21 | 3  |
| HORMAD2      | chr22 | 30553823 | A     | T   | -- | -- | Intron | SNP | 0.500 | 16 | 16 |
| CCDC157      | chr22 | 30756240 | C     | T   | -- | -- | Intron | SNP | 0.214 | 22 | 6  |
| --           | chr22 | 31073362 | GT    | -   | -- | -- | IGR    | DEL | 0.111 | 32 | 4  |
| OSBP2        | chr22 | 31116820 | G     | C   | -- | -- | Intron | SNP | 0.932 | 3  | 41 |
| EIF4ENIF1    | chr22 | 31854227 | C     | A   | -- | -- | Intron | SNP | 0.108 | 33 | 4  |
| SFI1         | chr22 | 31989729 | T     | C   | -- | -- | Intron | SNP | 0.250 | 12 | 4  |
| SFI1         | chr22 | 32000155 | C     | G   | -- | -- | Intron | SNP | 0.880 | 6  | 44 |
| SLC5A1       | chr22 | 32486104 | AAC   | -   | -- | -- | Intron | DEL | 0.200 | 12 | 3  |
| BPIFC        | chr22 | 32811422 | G     | T   | -- | -- | Intron | SNP | 0.848 | 5  | 28 |
| TIMP3        | chr22 | 33258346 | G     | A   | -- | -- | 3'UTR  | SNP | 0.929 | 3  | 39 |
| LARGE        | chr22 | 33824933 | A     | C   | -- | -- | Intron | SNP | 0.667 | 1  | 2  |
| LARGE        | chr22 | 34268458 | C     | T   | -- | -- | Intron | SNP | 0.111 | 24 | 3  |
| --           | chr22 | 34445607 | C     | G   | -- | -- | IGR    | SNP | 0.826 | 4  | 19 |
| --           | chr22 | 34564051 | T     | G   | -- | -- | IGR    | SNP | 0.406 | 19 | 13 |
| --           | chr22 | 34564052 | G     | T   | -- | -- | IGR    | SNP | 0.375 | 20 | 12 |
| --           | chr22 | 34601225 | A     | T   | -- | -- | IGR    | SNP | 0.476 | 11 | 10 |
| --           | chr22 | 34738755 | G     | A   | -- | -- | IGR    | SNP | 0.882 | 2  | 15 |
| --           | chr22 | 34945655 | A     | T   | -- | -- | IGR    | SNP | 0.400 | 6  | 4  |
| --           | chr22 | 34945656 | T     | A   | -- | -- | IGR    | SNP | 0.400 | 6  | 4  |
| --           | chr22 | 34994063 | G     | T   | -- | -- | IGR    | SNP | 0.545 | 10 | 12 |
| --           | chr22 | 36031487 | C     | T   | -- | -- | IGR    | SNP | 0.811 | 7  | 30 |
| RBFOX2       | chr22 | 36378503 | T     | A   | -- | -- | Intron | SNP | 0.486 | 18 | 17 |
| --           | chr22 | 36455937 | GGT   | -   | -- | -- | IGR    | DEL | 0.105 | 17 | 2  |
| --           | chr22 | 36471569 | G     | C   | -- | -- | IGR    | SNP | 0.385 | 32 | 20 |

|            |       |          |     |      |    |    |         |     |       |    |    |
|------------|-------|----------|-----|------|----|----|---------|-----|-------|----|----|
| --         | chr22 | 36668422 | G   | T    | -- | -- | IGR     | SNP | 0.375 | 5  | 3  |
| CACNG2     | chr22 | 37081670 | C   | G    | -- | -- | Intron  | SNP | 0.407 | 16 | 11 |
| --         | chr22 | 37133483 | G   | C    | -- | -- | IGR     | SNP | 0.448 | 16 | 13 |
| IFT27      | chr22 | 37161938 | C   | T    | -- | -- | Intron  | SNP | 0.404 | 28 | 19 |
| C22orf33   | chr22 | 37401584 | A   | C    | -- | -- | Intron  | SNP | 0.233 | 23 | 7  |
| TMPRSS6    | chr22 | 37491874 | C   | A    | -- | -- | Intron  | SNP | 0.406 | 19 | 13 |
| C1QTNF6    | chr22 | 37584673 | -   | AGGG | -- | -- | 5'Flank | INS | 0.756 | 7  | 31 |
| MFNG       | chr22 | 37867868 | C   | A    | -- | -- | Intron  | SNP | 0.429 | 4  | 3  |
| --         | chr22 | 38078651 | CT  | -    | -- | -- | IGR     | DEL | 0.143 | 12 | 2  |
| TRIOBP     | chr22 | 38097540 | G   | A    | -- | -- | Intron  | SNP | 0.789 | 8  | 30 |
| POLR2F     | chr22 | 38365051 | C   | G    | -- | -- | 3'UTR   | SNP | 0.889 | 3  | 24 |
| --         | chr22 | 38585090 | G   | A    | -- | -- | IGR     | SNP | 0.190 | 17 | 4  |
| --         | chr22 | 38671668 | G   | T    | -- | -- | IGR     | SNP | 0.222 | 14 | 4  |
| LOC400927  | chr22 | 38791161 | C   | G    | -- | -- | RNA     | SNP | 0.100 | 27 | 3  |
| LOC400927  | chr22 | 38791691 | G   | A    | -- | -- | RNA     | SNP | 0.119 | 37 | 5  |
| CBX6       | chr22 | 39267414 | C   | A    | -- | -- | Intron  | SNP | 0.216 | 29 | 8  |
| --         | chr22 | 39312978 | T   | C    | -- | -- | IGR     | SNP | 0.846 | 4  | 22 |
| --         | chr22 | 39938244 | C   | A    | -- | -- | IGR     | SNP | 0.837 | 7  | 36 |
| ENTHD1     | chr22 | 40276666 | A   | T    | -- | -- | Intron  | SNP | 0.344 | 21 | 11 |
| FAM83F     | chr22 | 40390970 | G   | A    | -- | -- | 5'UTR   | SNP | 1.000 | 0  | 2  |
| FAM83F     | chr22 | 40410130 | C   | T    | -- | -- | Intron  | SNP | 0.235 | 13 | 4  |
| ADSL       | chr22 | 40743505 | G   | A    | -- | -- | Intron  | SNP | 0.923 | 2  | 24 |
| ADSL       | chr22 | 40743820 | G   | A    | -- | -- | Intron  | SNP | 0.939 | 2  | 31 |
| ADSL       | chr22 | 40744201 | G   | C    | -- | -- | Intron  | SNP | 1.000 | 0  | 35 |
| MKL1       | chr22 | 41006935 | A   | T    | -- | -- | Intron  | SNP | 0.294 | 12 | 5  |
| MKL1       | chr22 | 41028494 | C   | T    | -- | -- | Intron  | SNP | 0.708 | 7  | 17 |
| ST13       | chr22 | 41225591 | T   | G    | -- | -- | Intron  | SNP | 0.346 | 17 | 9  |
| CHADL      | chr22 | 41629376 | G   | C    | -- | -- | Intron  | SNP | 0.839 | 5  | 26 |
| --         | chr22 | 41689791 | G   | A    | -- | -- | IGR     | SNP | 0.333 | 8  | 4  |
| ACO2       | chr22 | 41901120 | G   | T    | -- | -- | Intron  | SNP | 0.865 | 5  | 32 |
| XRCC6      | chr22 | 42027541 | G   | A    | -- | -- | Intron  | SNP | 0.190 | 17 | 4  |
| SREBF2     | chr22 | 42238855 | G   | A    | -- | -- | Intron  | SNP | 0.838 | 6  | 31 |
| CYP2D6     | chr22 | 42524502 | -   | CCT  | -- | -- | Intron  | INS | 0.121 | 29 | 4  |
| --         | chr22 | 42541753 | G   | C    | -- | -- | IGR     | SNP | 0.950 | 1  | 19 |
| --         | chr22 | 42664274 | C   | A    | -- | -- | IGR     | SNP | 0.154 | 22 | 4  |
| --         | chr22 | 42833821 | G   | T    | -- | -- | IGR     | SNP | 0.567 | 13 | 17 |
| CYB5R3     | chr22 | 43026364 | G   | A    | -- | -- | Intron  | SNP | 0.491 | 27 | 26 |
| --         | chr22 | 43071237 | G   | A    | -- | -- | IGR     | SNP | 0.875 | 4  | 28 |
| --         | chr22 | 43175451 | G   | T    | -- | -- | IGR     | SNP | 0.286 | 10 | 4  |
| ARFGAP3    | chr22 | 43253063 | C   | T    | -- | -- | Intron  | SNP | 0.821 | 5  | 23 |
| SCUBE1     | chr22 | 43663999 | G   | A    | -- | -- | Intron  | SNP | 0.432 | 21 | 16 |
| PARVG      | chr22 | 44570319 | G   | A    | -- | -- | Intron  | SNP | 0.474 | 10 | 9  |
| --         | chr22 | 44613671 | G   | A    | -- | -- | IGR     | SNP | 0.857 | 5  | 30 |
| --         | chr22 | 44633521 | -   | CAT  | -- | -- | IGR     | INS | 0.120 | 22 | 3  |
| --         | chr22 | 44637515 | C   | T    | -- | -- | IGR     | SNP | 0.444 | 5  | 4  |
| --         | chr22 | 45034109 | C   | A    | -- | -- | IGR     | SNP | 0.889 | 2  | 16 |
| ARHGAP8,PR | chr22 | 45153708 | A   | T    | -- | -- | Intron  | SNP | 0.211 | 15 | 4  |
| ARHGAP8,PR | chr22 | 45204689 | C   | A    | -- | -- | Intron  | SNP | 0.211 | 15 | 4  |
| PHF21B     | chr22 | 45332215 | C   | T    | -- | -- | Intron  | SNP | 0.853 | 5  | 29 |
| PHF21B     | chr22 | 45339148 | G   | A    | -- | -- | Intron  | SNP | 0.897 | 3  | 26 |
| PHF21B     | chr22 | 45339271 | G   | T    | -- | -- | Intron  | SNP | 0.759 | 7  | 22 |
| --         | chr22 | 45452871 | G   | A    | -- | -- | IGR     | SNP | 0.286 | 10 | 4  |
| --         | chr22 | 46279486 | G   | A    | -- | -- | IGR     | SNP | 0.905 | 4  | 38 |
| PPARA      | chr22 | 46606891 | C   | T    | -- | -- | Intron  | SNP | 0.837 | 7  | 36 |
| --         | chr22 | 47002468 | C   | A    | -- | -- | IGR     | SNP | 0.318 | 15 | 7  |
| --         | chr22 | 47012466 | C   | T    | -- | -- | IGR     | SNP | 0.172 | 24 | 5  |
| --         | chr22 | 47012480 | C   | T    | -- | -- | IGR     | SNP | 0.343 | 23 | 12 |
| TBC1D22A   | chr22 | 47276466 | C   | T    | -- | -- | Intron  | SNP | 0.414 | 17 | 12 |
| TBC1D22A   | chr22 | 47501131 | AT  | -    | -- | -- | Intron  | DEL | 0.111 | 16 | 2  |
| TBC1D22A   | chr22 | 47541773 | C   | G    | -- | -- | Intron  | SNP | 0.129 | 27 | 4  |
| --         | chr22 | 47832118 | G   | A    | -- | -- | IGR     | SNP | 0.294 | 24 | 10 |
| --         | chr22 | 47859908 | C   | A    | -- | -- | IGR     | SNP | 0.882 | 6  | 45 |
| --         | chr22 | 48426054 | A   | G    | -- | -- | IGR     | SNP | 0.571 | 12 | 16 |
| --         | chr22 | 48426499 | A   | C    | -- | -- | IGR     | SNP | 0.478 | 12 | 11 |
| --         | chr22 | 48495468 | T   | G    | -- | -- | IGR     | SNP | 0.949 | 2  | 37 |
| --         | chr22 | 48671660 | T   | C    | -- | -- | IGR     | SNP | 0.362 | 30 | 17 |
| --         | chr22 | 48797464 | A   | G    | -- | -- | IGR     | SNP | 0.250 | 9  | 3  |
| FAM19A5    | chr22 | 48990074 | A   | C    | -- | -- | Intron  | SNP | 0.432 | 25 | 19 |
| --         | chr22 | 49258425 | G   | A    | -- | -- | IGR     | SNP | 0.149 | 63 | 11 |
| --         | chr22 | 49312616 | C   | T    | -- | -- | IGR     | SNP | 0.282 | 28 | 11 |
| --         | chr22 | 49469185 | CCT | -    | -- | -- | IGR     | DEL | 0.393 | 37 | 24 |
| --         | chr22 | 49774686 | G   | A    | -- | -- | IGR     | SNP | 0.484 | 16 | 15 |
| --         | chr22 | 50104250 | G   | A    | -- | -- | IGR     | SNP | 0.800 | 10 | 40 |
| IL17REL    | chr22 | 50442010 | G   | C    | -- | -- | Intron  | SNP | 0.800 | 4  | 16 |
| PLXNB2     | chr22 | 50723734 | C   | T    | -- | -- | Intron  | SNP | 0.250 | 18 | 6  |
| PPP6R2     | chr22 | 50786844 | G   | A    | -- | -- | Intron  | SNP | 0.956 | 2  | 43 |
| PPP6R2     | chr22 | 50815785 | G   | A    | -- | -- | Intron  | SNP | 1.000 | 0  | 30 |
| SBF1       | chr22 | 50890268 | C   | T    | -- | -- | Intron  | SNP | 0.235 | 13 | 4  |
| SHANK3     | chr22 | 51118915 | C   | T    | -- | -- | Intron  | SNP | 0.333 | 10 | 5  |
| SHANK3     | chr22 | 51125133 | G   | A    | -- | -- | Intron  | SNP | 0.667 | 2  | 4  |

|                  |       |          |       |    |    |    |         |     |       |    |    |
|------------------|-------|----------|-------|----|----|----|---------|-----|-------|----|----|
| <i>RPL23AP82</i> | chr22 | 51194806 | -     | GT | -- | -- | 5'Flank | INS | 0.200 | 12 | 3  |
| --               | chrX  | 157054   | T     | G  | -- | -- | IGR     | SNP | 0.102 | 44 | 5  |
| --               | chrX  | 160698   | C     | G  | -- | -- | IGR     | SNP | 0.152 | 28 | 5  |
| --               | chrX  | 163202   | C     | G  | -- | -- | IGR     | SNP | 0.136 | 76 | 12 |
| --               | chrX  | 163247   | G     | A  | -- | -- | IGR     | SNP | 0.186 | 70 | 16 |
| --               | chrX  | 163248   | C     | G  | -- | -- | IGR     | SNP | 0.165 | 71 | 14 |
| --               | chrX  | 166568   | A     | T  | -- | -- | IGR     | SNP | 0.143 | 24 | 4  |
| --               | chrX  | 166630   | G     | A  | -- | -- | IGR     | SNP | 0.200 | 32 | 8  |
| --               | chrX  | 186118   | C     | A  | -- | -- | IGR     | SNP | 0.148 | 23 | 4  |
| --               | chrX  | 187268   | T     | C  | -- | -- | IGR     | SNP | 0.211 | 15 | 4  |
| --               | chrX  | 189296   | G     | A  | -- | -- | IGR     | SNP | 0.300 | 28 | 12 |
| --               | chrX  | 191318   | C     | T  | -- | -- | IGR     | SNP | 0.256 | 29 | 10 |
| --               | chrX  | 191320   | G     | A  | -- | -- | IGR     | SNP | 0.238 | 32 | 10 |
| <i>PLCXD1</i>    | chrX  | 213828   | C     | A  | -- | -- | Intron  | SNP | 0.333 | 6  | 3  |
| <i>GTPBP6</i>    | chrX  | 228877   | G     | A  | -- | -- | Intron  | SNP | 0.154 | 55 | 10 |
| <i>PPP2R3B</i>   | chrX  | 337813   | ACACC | -  | -- | -- | Intron  | DEL | 0.111 | 24 | 3  |
| <i>PPP2R3B</i>   | chrX  | 345742   | C     | A  | -- | -- | Intron  | SNP | 0.136 | 19 | 3  |
| --               | chrX  | 358749   | G     | T  | -- | -- | IGR     | SNP | 0.235 | 13 | 4  |
| --               | chrX  | 385638   | A     | G  | -- | -- | IGR     | SNP | 0.314 | 24 | 11 |
| --               | chrX  | 418384   | C     | T  | -- | -- | IGR     | SNP | 0.385 | 8  | 5  |
| --               | chrX  | 476401   | G     | T  | -- | -- | IGR     | SNP | 0.273 | 8  | 3  |
| --               | chrX  | 488161   | T     | C  | -- | -- | IGR     | SNP | 0.323 | 63 | 30 |
| --               | chrX  | 488226   | T     | C  | -- | -- | IGR     | SNP | 0.407 | 32 | 22 |
| --               | chrX  | 489116   | T     | C  | -- | -- | IGR     | SNP | 0.100 | 27 | 3  |
| --               | chrX  | 878845   | C     | T  | -- | -- | IGR     | SNP | 0.106 | 59 | 7  |
| --               | chrX  | 878850   | G     | C  | -- | -- | IGR     | SNP | 0.106 | 59 | 7  |
| --               | chrX  | 879644   | G     | A  | -- | -- | IGR     | SNP | 0.118 | 30 | 4  |
| --               | chrX  | 1207227  | ATG   | -  | -- | -- | IGR     | DEL | 0.150 | 17 | 3  |
| --               | chrX  | 1246939  | C     | A  | -- | -- | IGR     | SNP | 0.364 | 7  | 4  |
| <i>CSF2RA</i>    | chrX  | 1397444  | T     | G  | -- | -- | Intron  | SNP | 0.125 | 28 | 4  |
| <i>CSF2RA</i>    | chrX  | 1416415  | G     | C  | -- | -- | Intron  | SNP | 0.217 | 18 | 5  |
| <i>ASMTL</i>     | chrX  | 1562008  | G     | C  | -- | -- | Intron  | SNP | 0.232 | 43 | 13 |
| <i>ASMTL</i>     | chrX  | 1562062  | G     | A  | -- | -- | Intron  | SNP | 0.235 | 39 | 12 |
| <i>P2RY8</i>     | chrX  | 1590370  | T     | A  | -- | -- | Intron  | SNP | 0.273 | 24 | 9  |
| <i>P2RY8</i>     | chrX  | 1610687  | AAATG | -  | -- | -- | Intron  | DEL | 0.147 | 81 | 14 |
| <i>P2RY8</i>     | chrX  | 1633924  | G     | T  | -- | -- | Intron  | SNP | 0.318 | 15 | 7  |
| <i>DHRXSX</i>    | chrX  | 2212366  | C     | A  | -- | -- | Intron  | SNP | 0.280 | 36 | 14 |
| --               | chrX  | 2499861  | T     | A  | -- | -- | IGR     | SNP | 0.364 | 28 | 16 |
| --               | chrX  | 2590598  | G     | C  | -- | -- | IGR     | SNP | 0.414 | 17 | 12 |
| <i>CD99</i>      | chrX  | 2655582  | C     | A  | -- | -- | Intron  | SNP | 0.125 | 21 | 3  |
| --               | chrX  | 3296704  | C     | A  | -- | -- | IGR     | SNP | 0.588 | 14 | 20 |
| --               | chrX  | 3430855  | A     | G  | -- | -- | IGR     | SNP | 0.150 | 34 | 6  |
| --               | chrX  | 3430856  | G     | T  | -- | -- | IGR     | SNP | 0.146 | 35 | 6  |
| --               | chrX  | 3474930  | A     | G  | -- | -- | IGR     | SNP | 0.103 | 26 | 3  |
| --               | chrX  | 3497096  | A     | G  | -- | -- | IGR     | SNP | 0.209 | 34 | 9  |
| --               | chrX  | 3876332  | A     | G  | -- | -- | IGR     | SNP | 0.161 | 26 | 5  |
| --               | chrX  | 3926611  | G     | A  | -- | -- | IGR     | SNP | 0.444 | 5  | 4  |
| --               | chrX  | 4039391  | A     | T  | -- | -- | IGR     | SNP | 0.182 | 18 | 4  |
| --               | chrX  | 4111304  | T     | A  | -- | -- | IGR     | SNP | 0.216 | 29 | 8  |
| --               | chrX  | 4111305  | G     | T  | -- | -- | IGR     | SNP | 0.211 | 30 | 8  |
| --               | chrX  | 4125237  | A     | T  | -- | -- | IGR     | SNP | 0.222 | 28 | 8  |
| --               | chrX  | 4146395  | G     | T  | -- | -- | IGR     | SNP | 0.688 | 10 | 22 |
| --               | chrX  | 4298264  | G     | C  | -- | -- | IGR     | SNP | 0.739 | 6  | 17 |
| --               | chrX  | 4636410  | C     | T  | -- | -- | IGR     | SNP | 0.259 | 43 | 15 |
| --               | chrX  | 5140079  | T     | A  | -- | -- | IGR     | SNP | 0.583 | 5  | 7  |
| --               | chrX  | 5271708  | C     | T  | -- | -- | IGR     | SNP | 0.323 | 21 | 10 |
| --               | chrX  | 5286302  | -     | CA | -- | -- | IGR     | INS | 0.688 | 10 | 22 |
| --               | chrX  | 5367769  | G     | A  | -- | -- | IGR     | SNP | 0.321 | 19 | 9  |
| --               | chrX  | 5466509  | C     | T  | -- | -- | IGR     | SNP | 0.656 | 11 | 21 |
| <i>NLGN4X</i>    | chrX  | 5869185  | T     | C  | -- | -- | Intron  | SNP | 0.224 | 45 | 13 |
| <i>NLGN4X</i>    | chrX  | 5973294  | G     | A  | -- | -- | Intron  | SNP | 0.234 | 36 | 11 |
| --               | chrX  | 6153901  | G     | C  | -- | -- | IGR     | SNP | 0.138 | 25 | 4  |
| --               | chrX  | 6377632  | T     | A  | -- | -- | IGR     | SNP | 0.355 | 40 | 22 |
| --               | chrX  | 6464176  | T     | A  | -- | -- | IGR     | SNP | 0.220 | 39 | 11 |
| --               | chrX  | 6668163  | G     | C  | -- | -- | IGR     | SNP | 0.125 | 35 | 5  |
| --               | chrX  | 6799340  | C     | G  | -- | -- | IGR     | SNP | 0.300 | 28 | 12 |
| --               | chrX  | 6870725  | G     | A  | -- | -- | IGR     | SNP | 0.462 | 21 | 18 |
| --               | chrX  | 7293929  | T     | C  | -- | -- | IGR     | SNP | 0.316 | 39 | 18 |
| --               | chrX  | 7341068  | G     | C  | -- | -- | IGR     | SNP | 0.270 | 27 | 10 |
| --               | chrX  | 7421513  | A     | C  | -- | -- | IGR     | SNP | 0.622 | 17 | 28 |
| --               | chrX  | 7586411  | G     | T  | -- | -- | IGR     | SNP | 0.205 | 31 | 8  |
| --               | chrX  | 7603787  | T     | C  | -- | -- | IGR     | SNP | 0.341 | 27 | 14 |
| --               | chrX  | 7720178  | G     | T  | -- | -- | IGR     | SNP | 0.308 | 9  | 4  |
| --               | chrX  | 7918163  | A     | C  | -- | -- | IGR     | SNP | 0.245 | 37 | 12 |
| --               | chrX  | 8121908  | A     | G  | -- | -- | IGR     | SNP | 0.345 | 19 | 10 |
| --               | chrX  | 8171241  | C     | T  | -- | -- | IGR     | SNP | 0.341 | 27 | 14 |
| --               | chrX  | 8186276  | G     | T  | -- | -- | IGR     | SNP | 0.649 | 26 | 48 |
| --               | chrX  | 8188029  | T     | G  | -- | -- | IGR     | SNP | 0.357 | 27 | 15 |
| --               | chrX  | 8423506  | A     | G  | -- | -- | IGR     | SNP | 0.250 | 33 | 11 |
| <i>KAL1</i>      | chrX  | 8514283  | G     | T  | -- | -- | Intron  | SNP | 0.353 | 33 | 18 |

|         |      |          |     |       |        |       |                 |     |       |    |    |
|---------|------|----------|-----|-------|--------|-------|-----------------|-----|-------|----|----|
| KAL1    | chrX | 8535056  | G   | C     | --     | --    | Intron          | SNP | 0.320 | 17 | 8  |
| --      | chrX | 9222039  | A   | G     | --     | --    | IGR             | SNP | 0.487 | 20 | 19 |
| --      | chrX | 9238588  | A   | T     | --     | --    | IGR             | SNP | 0.122 | 36 | 5  |
| --      | chrX | 9364291  | G   | C     | --     | --    | IGR             | SNP | 0.176 | 14 | 3  |
| TBL1X   | chrX | 9453412  | C   | A     | --     | --    | Intron          | SNP | 0.256 | 29 | 10 |
| TBL1X   | chrX | 9581092  | G   | A     | --     | --    | Intron          | SNP | 0.111 | 24 | 3  |
| SHROOM2 | chrX | 9900235  | G   | A     | G2912A | R971Q | Missense_mutati | SNP | 0.580 | 21 | 29 |
| --      | chrX | 10309620 | C   | G     | --     | --    | IGR             | SNP | 0.673 | 18 | 37 |
| --      | chrX | 10358873 | A   | T     | --     | --    | IGR             | SNP | 0.213 | 37 | 10 |
| MID1    | chrX | 10463891 | A   | C     | --     | --    | Intron          | SNP | 0.286 | 35 | 14 |
| MID1    | chrX | 10795510 | -   | GT    | --     | --    | Intron          | INS | 0.143 | 12 | 2  |
| --      | chrX | 10978421 | T   | G     | --     | --    | IGR             | SNP | 0.154 | 44 | 8  |
| --      | chrX | 11008071 | G   | C     | --     | --    | IGR             | SNP | 0.558 | 19 | 24 |
| ARHGAP6 | chrX | 11192751 | -   | CT    | --     | --    | Intron          | INS | 0.133 | 13 | 2  |
| ARHGAP6 | chrX | 11491035 | T   | A     | --     | --    | Intron          | SNP | 0.413 | 27 | 19 |
| ARHGAP6 | chrX | 11545180 | C   | G     | --     | --    | Intron          | SNP | 0.174 | 19 | 4  |
| ARHGAP6 | chrX | 11591157 | -   | TTTGA | --     | --    | Intron          | INS | 0.118 | 15 | 2  |
| ARHGAP6 | chrX | 11610906 | G   | A     | --     | --    | Intron          | SNP | 0.564 | 17 | 22 |
| --      | chrX | 11945018 | G   | A     | --     | --    | IGR             | SNP | 0.282 | 28 | 11 |
| --      | chrX | 12126077 | G   | T     | --     | --    | IGR             | SNP | 0.458 | 13 | 11 |
| FRMPD4  | chrX | 12173730 | G   | A     | --     | --    | Intron          | SNP | 0.150 | 17 | 3  |
| FRMPD4  | chrX | 12493987 | T   | C     | --     | --    | Intron          | SNP | 0.385 | 8  | 5  |
| FRMPD4  | chrX | 12520810 | G   | T     | --     | --    | Intron          | SNP | 0.250 | 27 | 9  |
| PRPS2   | chrX | 12834431 | T   | C     | --     | --    | Intron          | SNP | 0.682 | 14 | 30 |
| --      | chrX | 13013305 | C   | A     | --     | --    | IGR             | SNP | 0.250 | 30 | 10 |
| --      | chrX | 13018319 | T   | C     | --     | --    | IGR             | SNP | 0.694 | 11 | 25 |
| --      | chrX | 13087295 | A   | C     | --     | --    | IGR             | SNP | 0.289 | 32 | 13 |
| --      | chrX | 13226387 | C   | A     | --     | --    | IGR             | SNP | 0.250 | 12 | 4  |
| --      | chrX | 13532137 | T   | C     | --     | --    | IGR             | SNP | 0.475 | 21 | 19 |
| GPM6B   | chrX | 13908734 | C   | G     | --     | --    | Intron          | SNP | 0.440 | 28 | 22 |
| --      | chrX | 14018352 | G   | A     | --     | --    | IGR             | SNP | 0.320 | 17 | 8  |
| --      | chrX | 14115884 | T   | A     | --     | --    | IGR             | SNP | 0.140 | 37 | 6  |
| --      | chrX | 14121413 | G   | T     | --     | --    | IGR             | SNP | 0.310 | 20 | 9  |
| --      | chrX | 14379324 | G   | T     | --     | --    | IGR             | SNP | 0.442 | 29 | 23 |
| --      | chrX | 14424103 | G   | A     | --     | --    | IGR             | SNP | 0.513 | 19 | 20 |
| --      | chrX | 14474754 | A   | T     | --     | --    | IGR             | SNP | 0.283 | 33 | 13 |
| --      | chrX | 14512613 | -   | GT    | --     | --    | IGR             | INS | 0.390 | 25 | 16 |
| GLRA2   | chrX | 14585017 | TTC | -     | --     | --    | Intron          | DEL | 0.102 | 44 | 5  |
| --      | chrX | 14976243 | C   | A     | --     | --    | IGR             | SNP | 0.118 | 30 | 4  |
| --      | chrX | 14976244 | C   | A     | --     | --    | IGR             | SNP | 0.118 | 30 | 4  |
| --      | chrX | 15015112 | A   | T     | --     | --    | IGR             | SNP | 0.391 | 28 | 18 |
| --      | chrX | 15196354 | T   | G     | --     | --    | IGR             | SNP | 0.286 | 40 | 16 |
| ASB11   | chrX | 15333571 | C   | G     | G157C  | E53Q  | Missense_mutati | SNP | 0.316 | 26 | 12 |
| CA5B    | chrX | 15799289 | A   | G     | --     | --    | Intron          | SNP | 0.132 | 33 | 5  |
| CA5B    | chrX | 15799290 | G   | T     | --     | --    | Intron          | SNP | 0.135 | 32 | 5  |
| --      | chrX | 15950334 | G   | C     | --     | --    | IGR             | SNP | 0.625 | 12 | 20 |
| --      | chrX | 15950422 | G   | C     | --     | --    | IGR             | SNP | 0.600 | 18 | 27 |
| --      | chrX | 16177340 | C   | A     | --     | --    | IGR             | SNP | 0.194 | 29 | 7  |
| --      | chrX | 16266735 | C   | G     | --     | --    | IGR             | SNP | 0.422 | 26 | 19 |
| --      | chrX | 16382753 | C   | A     | --     | --    | IGR             | SNP | 0.375 | 10 | 6  |
| --      | chrX | 16536419 | G   | A     | --     | --    | IGR             | SNP | 0.583 | 15 | 21 |
| RBBP7   | chrX | 16870096 | A   | T     | --     | --    | Intron          | SNP | 0.200 | 36 | 9  |
| REPS2   | chrX | 17157991 | C   | A     | --     | --    | Intron          | SNP | 0.317 | 41 | 19 |
| --      | chrX | 17202596 | G   | A     | --     | --    | IGR             | SNP | 0.286 | 5  | 2  |
| --      | chrX | 17280554 | GT  | -     | --     | --    | IGR             | DEL | 0.308 | 18 | 8  |
| NHS     | chrX | 17612734 | G   | C     | --     | --    | Intron          | SNP | 0.255 | 38 | 13 |
| SCML2   | chrX | 18271224 | G   | T     | --     | --    | Intron          | SNP | 0.105 | 34 | 4  |
| PPEF1   | chrX | 18722304 | -   | CA    | --     | --    | Intron          | INS | 0.488 | 21 | 20 |
| --      | chrX | 18892026 | A   | T     | --     | --    | IGR             | SNP | 0.205 | 31 | 8  |
| PHKA2   | chrX | 18917244 | C   | T     | --     | --    | Intron          | SNP | 0.275 | 37 | 14 |
| PHKA2   | chrX | 18970036 | A   | G     | --     | --    | Intron          | SNP | 0.256 | 32 | 11 |
| GPR64   | chrX | 19089323 | A   | G     | --     | --    | Intron          | SNP | 0.282 | 28 | 11 |
| --      | chrX | 19274642 | G   | A     | --     | --    | IGR             | SNP | 0.548 | 14 | 17 |
| PDHA1   | chrX | 19364322 | G   | A     | --     | --    | Intron          | SNP | 0.486 | 18 | 17 |
| SH3KBP1 | chrX | 19661091 | C   | T     | --     | --    | Intron          | SNP | 0.583 | 15 | 21 |
| SH3KBP1 | chrX | 19800902 | C   | A     | --     | --    | Intron          | SNP | 0.234 | 36 | 11 |
| SH3KBP1 | chrX | 19849953 | A   | G     | --     | --    | Intron          | SNP | 0.581 | 13 | 18 |
| SH3KBP1 | chrX | 19877029 | C   | T     | --     | --    | Intron          | SNP | 0.660 | 18 | 35 |
| --      | chrX | 20386986 | G   | T     | --     | --    | IGR             | SNP | 0.500 | 23 | 23 |
| --      | chrX | 20410153 | TG  | -     | --     | --    | IGR             | DEL | 0.133 | 13 | 2  |
| --      | chrX | 20419953 | G   | T     | --     | --    | IGR             | SNP | 0.282 | 28 | 11 |
| --      | chrX | 20439747 | C   | A     | --     | --    | IGR             | SNP | 0.257 | 26 | 9  |
| --      | chrX | 20554185 | A   | T     | --     | --    | IGR             | SNP | 0.107 | 25 | 3  |
| --      | chrX | 20725058 | C   | T     | --     | --    | IGR             | SNP | 0.444 | 15 | 12 |
| --      | chrX | 20905136 | G   | T     | --     | --    | IGR             | SNP | 0.167 | 20 | 4  |
| --      | chrX | 20940345 | GTA | -     | --     | --    | IGR             | DEL | 0.158 | 16 | 3  |
| --      | chrX | 20982019 | G   | C     | --     | --    | IGR             | SNP | 0.595 | 17 | 25 |
| --      | chrX | 21033605 | T   | G     | --     | --    | IGR             | SNP | 0.289 | 32 | 13 |
| --      | chrX | 21159826 | G   | T     | --     | --    | IGR             | SNP | 0.158 | 48 | 9  |
| --      | chrX | 21176423 | G   | A     | --     | --    | IGR             | SNP | 0.277 | 34 | 13 |

|                 |      |          |     |         |    |    |        |     |       |    |    |
|-----------------|------|----------|-----|---------|----|----|--------|-----|-------|----|----|
| --              | chrX | 21287881 | G   | A       | -- | -- | IGR    | SNP | 0.333 | 22 | 11 |
| --              | chrX | 21289262 | A   | G       | -- | -- | IGR    | SNP | 0.464 | 15 | 13 |
| --              | chrX | 21336236 | T   | C       | -- | -- | IGR    | SNP | 0.278 | 26 | 10 |
| --              | chrX | 21352191 | C   | G       | -- | -- | IGR    | SNP | 0.500 | 17 | 17 |
| <i>CNKSR2</i>   | chrX | 21560356 | A   | G       | -- | -- | Intron | SNP | 0.365 | 40 | 23 |
| <i>CNKSR2</i>   | chrX | 21607849 | G   | T       | -- | -- | Intron | SNP | 0.327 | 35 | 17 |
| --              | chrX | 21791290 | G   | C       | -- | -- | IGR    | SNP | 0.326 | 29 | 14 |
| --              | chrX | 21818784 | T   | G       | -- | -- | IGR    | SNP | 0.333 | 30 | 15 |
| --              | chrX | 21834737 | G   | T       | -- | -- | IGR    | SNP | 0.179 | 32 | 7  |
| <i>PHEX</i>     | chrX | 22065355 | T   | C       | -- | -- | Intron | SNP | 0.231 | 30 | 9  |
| <i>PHEX</i>     | chrX | 22235152 | G   | A       | -- | -- | Intron | SNP | 0.325 | 27 | 13 |
| --              | chrX | 22305368 | G   | A       | -- | -- | IGR    | SNP | 0.231 | 10 | 3  |
| --              | chrX | 22362415 | G   | T       | -- | -- | IGR    | SNP | 0.375 | 25 | 15 |
| --              | chrX | 22436860 | A   | C       | -- | -- | IGR    | SNP | 0.222 | 14 | 4  |
| --              | chrX | 22552652 | A   | C       | -- | -- | IGR    | SNP | 0.619 | 8  | 13 |
| --              | chrX | 22571878 | T   | C       | -- | -- | IGR    | SNP | 0.686 | 11 | 24 |
| --              | chrX | 22784644 | G   | A       | -- | -- | IGR    | SNP | 0.512 | 20 | 21 |
| --              | chrX | 22810057 | C   | A       | -- | -- | IGR    | SNP | 0.115 | 23 | 3  |
| --              | chrX | 23056284 | C   | G       | -- | -- | IGR    | SNP | 0.132 | 33 | 5  |
| --              | chrX | 23077322 | C   | A       | -- | -- | IGR    | SNP | 0.232 | 43 | 13 |
| <i>PTCHD1</i>   | chrX | 23405778 | A   | G       | -- | -- | Intron | SNP | 0.103 | 26 | 3  |
| <i>PTCHD1</i>   | chrX | 23406118 | C   | T       | -- | -- | Intron | SNP | 0.250 | 39 | 13 |
| --              | chrX | 23434540 | C   | G       | -- | -- | IGR    | SNP | 0.119 | 37 | 5  |
| --              | chrX | 23514349 | A   | C       | -- | -- | IGR    | SNP | 0.314 | 24 | 11 |
| --              | chrX | 23647073 | G   | C       | -- | -- | IGR    | SNP | 0.347 | 32 | 17 |
| --              | chrX | 23658868 | -   | TG      | -- | -- | IGR    | INS | 0.512 | 20 | 21 |
| --              | chrX | 23680809 | T   | A       | -- | -- | IGR    | SNP | 0.581 | 18 | 25 |
| <i>APOO</i>     | chrX | 23873879 | T   | C       | -- | -- | Intron | SNP | 0.214 | 44 | 12 |
| <i>CXorf58</i>  | chrX | 23934932 | A   | T       | -- | -- | Intron | SNP | 0.241 | 22 | 7  |
| <i>KLHL15</i>   | chrX | 24019951 | G   | A       | -- | -- | Intron | SNP | 0.250 | 12 | 4  |
| --              | chrX | 24148278 | G   | A       | -- | -- | IGR    | SNP | 0.262 | 31 | 11 |
| <i>ZFX</i>      | chrX | 24176938 | G   | T       | -- | -- | Intron | SNP | 0.444 | 5  | 4  |
| <i>PDK3</i>     | chrX | 24484432 | G   | A       | -- | -- | Intron | SNP | 0.191 | 38 | 9  |
| <i>POLA1</i>    | chrX | 24729394 | C   | G       | -- | -- | Intron | SNP | 0.600 | 14 | 21 |
| <i>POLA1</i>    | chrX | 24939246 | C   | T       | -- | -- | Intron | SNP | 0.265 | 36 | 13 |
| --              | chrX | 25294604 | G   | C       | -- | -- | IGR    | SNP | 0.370 | 29 | 17 |
| --              | chrX | 25316825 | C   | T       | -- | -- | IGR    | SNP | 0.286 | 35 | 14 |
| --              | chrX | 25391108 | G   | T       | -- | -- | IGR    | SNP | 0.300 | 35 | 15 |
| --              | chrX | 25425398 | G   | A       | -- | -- | IGR    | SNP | 0.200 | 16 | 4  |
| --              | chrX | 25553676 | C   | T       | -- | -- | IGR    | SNP | 0.316 | 26 | 12 |
| --              | chrX | 26166602 | C   | T       | -- | -- | IGR    | SNP | 0.206 | 27 | 7  |
| --              | chrX | 26276118 | G   | A       | -- | -- | IGR    | SNP | 0.355 | 20 | 11 |
| --              | chrX | 26288711 | T   | A       | -- | -- | IGR    | SNP | 0.235 | 26 | 8  |
| --              | chrX | 26338209 | C   | A       | -- | -- | IGR    | SNP | 0.400 | 9  | 6  |
| --              | chrX | 26388870 | G   | T       | -- | -- | IGR    | SNP | 0.516 | 15 | 16 |
| --              | chrX | 26569855 | AT  | -       | -- | -- | IGR    | DEL | 0.172 | 24 | 5  |
| --              | chrX | 26585189 | A   | T       | -- | -- | IGR    | SNP | 0.586 | 12 | 17 |
| --              | chrX | 26631674 | G   | A       | -- | -- | IGR    | SNP | 0.262 | 31 | 11 |
| --              | chrX | 26633611 | C   | T       | -- | -- | IGR    | SNP | 0.342 | 25 | 13 |
| --              | chrX | 26777644 | A   | G       | -- | -- | IGR    | SNP | 0.484 | 16 | 15 |
| --              | chrX | 26832899 | G   | T       | -- | -- | IGR    | SNP | 0.500 | 14 | 14 |
| --              | chrX | 27096210 | T   | C       | -- | -- | IGR    | SNP | 0.317 | 28 | 13 |
| --              | chrX | 27228908 | -   | TATATAC | -- | -- | IGR    | INS | 0.118 | 15 | 2  |
| --              | chrX | 27229087 | CAT | -       | -- | -- | IGR    | DEL | 0.318 | 15 | 7  |
| --              | chrX | 27367982 | T   | G       | -- | -- | IGR    | SNP | 0.289 | 27 | 11 |
| --              | chrX | 27537649 | G   | A       | -- | -- | IGR    | SNP | 0.278 | 26 | 10 |
| --              | chrX | 27546619 | TAC | -       | -- | -- | IGR    | DEL | 0.133 | 13 | 2  |
| --              | chrX | 27582654 | ATG | -       | -- | -- | IGR    | DEL | 0.356 | 29 | 16 |
| --              | chrX | 27637054 | T   | C       | -- | -- | IGR    | SNP | 0.256 | 29 | 10 |
| --              | chrX | 27847973 | T   | G       | -- | -- | IGR    | SNP | 0.286 | 25 | 10 |
| --              | chrX | 27866506 | T   | G       | -- | -- | IGR    | SNP | 0.514 | 17 | 18 |
| --              | chrX | 27901927 | A   | T       | -- | -- | IGR    | SNP | 0.250 | 18 | 6  |
| --              | chrX | 27903442 | A   | T       | -- | -- | IGR    | SNP | 0.512 | 20 | 21 |
| --              | chrX | 27915942 | G   | A       | -- | -- | IGR    | SNP | 0.556 | 16 | 20 |
| --              | chrX | 28012760 | C   | T       | -- | -- | IGR    | SNP | 0.235 | 13 | 4  |
| --              | chrX | 28057885 | A   | G       | -- | -- | IGR    | SNP | 0.351 | 37 | 20 |
| --              | chrX | 28114557 | TC  | -       | -- | -- | IGR    | DEL | 0.200 | 12 | 3  |
| --              | chrX | 28114739 | G   | T       | -- | -- | IGR    | SNP | 0.188 | 13 | 3  |
| --              | chrX | 28114765 | T   | C       | -- | -- | IGR    | SNP | 0.214 | 11 | 3  |
| --              | chrX | 28198077 | G   | T       | -- | -- | IGR    | SNP | 0.289 | 27 | 11 |
| --              | chrX | 28255558 | T   | G       | -- | -- | IGR    | SNP | 0.571 | 15 | 20 |
| --              | chrX | 28330265 | G   | T       | -- | -- | IGR    | SNP | 0.344 | 21 | 11 |
| --              | chrX | 28433115 | C   | T       | -- | -- | IGR    | SNP | 0.462 | 14 | 12 |
| --              | chrX | 28435947 | G   | T       | -- | -- | IGR    | SNP | 0.349 | 28 | 15 |
| --              | chrX | 28523395 | G   | T       | -- | -- | IGR    | SNP | 0.357 | 27 | 15 |
| <i>IL1RAPL1</i> | chrX | 28671609 | C   | A       | -- | -- | Intron | SNP | 0.235 | 39 | 12 |
| <i>IL1RAPL1</i> | chrX | 28782830 | T   | A       | -- | -- | Intron | SNP | 0.360 | 16 | 9  |
| <i>IL1RAPL1</i> | chrX | 28845631 | C   | T       | -- | -- | Intron | SNP | 0.310 | 20 | 9  |
| <i>IL1RAPL1</i> | chrX | 28962710 | C   | A       | -- | -- | Intron | SNP | 0.179 | 23 | 5  |
| <i>IL1RAPL1</i> | chrX | 29079606 | G   | T       | -- | -- | Intron | SNP | 0.188 | 26 | 6  |



|          |      |          |      |     |    |    |        |     |       |    |    |
|----------|------|----------|------|-----|----|----|--------|-----|-------|----|----|
| IL1RAPL1 | chrX | 29095740 | G    | A   | -- | -- | Intron | SNP | 0.185 | 22 | 5  |
| IL1RAPL1 | chrX | 29239526 | C    | G   | -- | -- | Intron | SNP | 0.261 | 17 | 6  |
| IL1RAPL1 | chrX | 29264293 | A    | T   | -- | -- | Intron | SNP | 0.133 | 26 | 4  |
| IL1RAPL1 | chrX | 29314477 | G    | A   | -- | -- | Intron | SNP | 0.171 | 29 | 6  |
| IL1RAPL1 | chrX | 29386727 | G    | T   | -- | -- | Intron | SNP | 0.188 | 13 | 3  |
| IL1RAPL1 | chrX | 29476207 | C    | T   | -- | -- | Intron | SNP | 0.244 | 31 | 10 |
| IL1RAPL1 | chrX | 29535457 | GTA  | -   | -- | -- | Intron | DEL | 0.111 | 16 | 2  |
| IL1RAPL1 | chrX | 29541030 | TTC  | -   | -- | -- | Intron | DEL | 0.111 | 31 | 4  |
| IL1RAPL1 | chrX | 29624832 | C    | G   | -- | -- | Intron | SNP | 0.333 | 18 | 9  |
| IL1RAPL1 | chrX | 29637022 | T    | A   | -- | -- | Intron | SNP | 0.563 | 14 | 18 |
| IL1RAPL1 | chrX | 29660365 | C    | G   | -- | -- | Intron | SNP | 0.611 | 14 | 22 |
| IL1RAPL1 | chrX | 29879954 | C    | A   | -- | -- | Intron | SNP | 0.625 | 9  | 15 |
| IL1RAPL1 | chrX | 29932805 | AC   | -   | -- | -- | Intron | DEL | 0.269 | 19 | 7  |
| --       | chrX | 30293289 | G    | T   | -- | -- | IGR    | SNP | 0.121 | 29 | 4  |
| --       | chrX | 30390992 | G    | A   | -- | -- | IGR    | SNP | 0.344 | 40 | 21 |
| --       | chrX | 30543347 | C    | T   | -- | -- | IGR    | SNP | 0.238 | 32 | 10 |
| --       | chrX | 30632328 | A    | G   | -- | -- | IGR    | SNP | 0.378 | 23 | 14 |
| --       | chrX | 30632329 | G    | T   | -- | -- | IGR    | SNP | 0.368 | 24 | 14 |
| GK       | chrX | 30688400 | C    | A   | -- | -- | Intron | SNP | 0.533 | 28 | 32 |
| --       | chrX | 30766116 | G    | T   | -- | -- | IGR    | SNP | 0.231 | 10 | 3  |
| --       | chrX | 30982978 | T    | C   | -- | -- | IGR    | SNP | 0.269 | 38 | 14 |
| --       | chrX | 31117224 | G    | A   | -- | -- | IGR    | SNP | 0.422 | 26 | 19 |
| DMD      | chrX | 31178759 | C    | G   | -- | -- | Intron | SNP | 0.310 | 29 | 13 |
| DMD      | chrX | 31341999 | A    | C   | -- | -- | Intron | SNP | 0.269 | 19 | 7  |
| DMD      | chrX | 31508568 | G    | A   | -- | -- | Intron | SNP | 0.683 | 13 | 28 |
| DMD      | chrX | 31564070 | T    | A   | -- | -- | Intron | SNP | 0.216 | 40 | 11 |
| DMD      | chrX | 31602021 | C    | T   | -- | -- | Intron | SNP | 0.778 | 4  | 14 |
| DMD      | chrX | 31679845 | ATG  | -   | -- | -- | Intron | DEL | 0.103 | 35 | 4  |
| DMD      | chrX | 31896279 | C    | A   | -- | -- | Intron | SNP | 0.625 | 15 | 25 |
| DMD      | chrX | 31896849 | A    | G   | -- | -- | Intron | SNP | 0.304 | 32 | 14 |
| DMD      | chrX | 31963648 | C    | G   | -- | -- | Intron | SNP | 0.341 | 29 | 15 |
| DMD      | chrX | 31999394 | C    | T   | -- | -- | Intron | SNP | 0.324 | 25 | 12 |
| DMD      | chrX | 32000616 | T    | A   | -- | -- | Intron | SNP | 0.333 | 18 | 9  |
| DMD      | chrX | 32017799 | C    | A   | -- | -- | Intron | SNP | 0.152 | 28 | 5  |
| DMD      | chrX | 32022323 | T    | C   | -- | -- | Intron | SNP | 0.290 | 22 | 9  |
| DMD      | chrX | 32038027 | G    | C   | -- | -- | Intron | SNP | 0.464 | 15 | 13 |
| DMD      | chrX | 32088840 | G    | A   | -- | -- | Intron | SNP | 0.214 | 33 | 9  |
| DMD      | chrX | 32387147 | C    | T   | -- | -- | Intron | SNP | 0.432 | 21 | 16 |
| DMD      | chrX | 32419504 | A    | G   | -- | -- | Intron | SNP | 0.282 | 28 | 11 |
| DMD      | chrX | 32536696 | C    | A   | -- | -- | Intron | SNP | 0.302 | 30 | 13 |
| DMD      | chrX | 32659692 | G    | T   | -- | -- | Intron | SNP | 0.190 | 17 | 4  |
| DMD      | chrX | 33123826 | A    | C   | -- | -- | Intron | SNP | 0.270 | 27 | 10 |
| DMD      | chrX | 33154952 | C    | A   | -- | -- | Intron | SNP | 0.200 | 24 | 6  |
| DMD      | chrX | 33160427 | C    | A   | -- | -- | Intron | SNP | 0.412 | 20 | 14 |
| DMD      | chrX | 33204574 | G    | C   | -- | -- | Intron | SNP | 0.389 | 22 | 14 |
| DMD      | chrX | 33299344 | G    | T   | -- | -- | Intron | SNP | 0.222 | 14 | 4  |
| --       | chrX | 33426605 | G    | T   | -- | -- | IGR    | SNP | 0.250 | 30 | 10 |
| --       | chrX | 33470287 | C    | A   | -- | -- | IGR    | SNP | 0.190 | 17 | 4  |
| --       | chrX | 33693586 | G    | A   | -- | -- | IGR    | SNP | 0.300 | 28 | 12 |
| --       | chrX | 33725954 | G    | T   | -- | -- | IGR    | SNP | 0.242 | 25 | 8  |
| --       | chrX | 33857470 | A    | T   | -- | -- | IGR    | SNP | 0.286 | 10 | 4  |
| --       | chrX | 33937193 | TTCC | -   | -- | -- | IGR    | DEL | 0.172 | 24 | 5  |
| --       | chrX | 33937218 | TTC  | -   | -- | -- | IGR    | DEL | 0.103 | 26 | 3  |
| --       | chrX | 33948726 | T    | G   | -- | -- | IGR    | SNP | 0.333 | 10 | 5  |
| --       | chrX | 34040629 | T    | C   | -- | -- | IGR    | SNP | 0.394 | 20 | 13 |
| --       | chrX | 34045991 | A    | T   | -- | -- | IGR    | SNP | 0.185 | 22 | 5  |
| --       | chrX | 34183642 | T    | A   | -- | -- | IGR    | SNP | 0.556 | 16 | 20 |
| --       | chrX | 34368033 | G    | A   | -- | -- | IGR    | SNP | 0.103 | 35 | 4  |
| --       | chrX | 34430091 | G    | A   | -- | -- | IGR    | SNP | 0.382 | 21 | 13 |
| --       | chrX | 34755076 | T    | C   | -- | -- | IGR    | SNP | 0.300 | 14 | 6  |
| --       | chrX | 34814135 | T    | A   | -- | -- | IGR    | SNP | 0.226 | 24 | 7  |
| --       | chrX | 35232685 | T    | A   | -- | -- | IGR    | SNP | 0.212 | 26 | 7  |
| --       | chrX | 35272959 | C    | G   | -- | -- | IGR    | SNP | 0.265 | 25 | 9  |
| --       | chrX | 35486907 | C    | G   | -- | -- | IGR    | SNP | 0.185 | 22 | 5  |
| --       | chrX | 35606126 | G    | T   | -- | -- | IGR    | SNP | 0.345 | 19 | 10 |
| --       | chrX | 35664919 | T    | A   | -- | -- | IGR    | SNP | 0.143 | 18 | 3  |
| --       | chrX | 35823568 | G    | T   | -- | -- | IGR    | SNP | 0.419 | 18 | 13 |
| CXorf22  | chrX | 35955251 | C    | T   | -- | -- | Intron | SNP | 0.333 | 8  | 4  |
| CXorf59  | chrX | 36067603 | -    | TCA | -- | -- | Intron | INS | 0.148 | 23 | 4  |
| CXorf59  | chrX | 36135271 | T    | A   | -- | -- | Intron | SNP | 0.213 | 37 | 10 |
| CXorf30  | chrX | 36275962 | A    | G   | -- | -- | Intron | SNP | 0.611 | 14 | 22 |
| CXorf30  | chrX | 36335191 | C    | A   | -- | -- | Intron | SNP | 0.156 | 27 | 5  |
| CXorf30  | chrX | 36335192 | A    | C   | -- | -- | Intron | SNP | 0.156 | 27 | 5  |
| --       | chrX | 36628194 | G    | T   | -- | -- | IGR    | SNP | 0.378 | 23 | 14 |
| --       | chrX | 36647430 | AAT  | -   | -- | -- | IGR    | DEL | 0.118 | 15 | 2  |
| --       | chrX | 36900949 | C    | T   | -- | -- | IGR    | SNP | 0.674 | 14 | 29 |
| --       | chrX | 36901555 | T    | C   | -- | -- | IGR    | SNP | 0.400 | 24 | 16 |
| --       | chrX | 36916806 | G    | C   | -- | -- | IGR    | SNP | 0.292 | 34 | 14 |
| --       | chrX | 37068921 | T    | A   | -- | -- | IGR    | SNP | 0.422 | 26 | 19 |
| PRRG1    | chrX | 37283003 | A    | G   | -- | -- | Intron | SNP | 0.240 | 19 | 6  |

|           |      |          |       |        |        |       |                 |     |       |    |    |
|-----------|------|----------|-------|--------|--------|-------|-----------------|-----|-------|----|----|
| LANCL3    | chrX | 37488011 | C     | A      | --     | --    | Intron          | SNP | 0.167 | 15 | 3  |
| LANCL3    | chrX | 37526861 | T     | A      | --     | --    | Intron          | SNP | 0.167 | 25 | 5  |
| XK        | chrX | 37572421 | C     | T      | --     | --    | Intron          | SNP | 0.298 | 33 | 14 |
| SRPX      | chrX | 38077971 | C     | A      | --     | --    | Intron          | SNP | 0.106 | 42 | 5  |
| RPGR      | chrX | 38158818 | G     | C      | --     | --    | Intron          | SNP | 0.200 | 24 | 6  |
| OTC       | chrX | 38221126 | C     | G      | --     | --    | Intron          | SNP | 0.444 | 15 | 12 |
| OTC       | chrX | 38274121 | T     | A      | --     | --    | Intron          | SNP | 0.579 | 16 | 22 |
| --        | chrX | 38295191 | C     | A      | --     | --    | IGR             | SNP | 0.630 | 17 | 29 |
| --        | chrX | 38378904 | A     | T      | --     | --    | IGR             | SNP | 0.303 | 23 | 10 |
| TSPAN7    | chrX | 38442900 | G     | T      | --     | --    | Intron          | SNP | 0.254 | 44 | 15 |
| TSPAN7    | chrX | 38535922 | C     | T      | --     | --    | Intron          | SNP | 0.268 | 30 | 11 |
| --        | chrX | 38614309 | G     | C      | --     | --    | IGR             | SNP | 0.173 | 43 | 9  |
| --        | chrX | 39108604 | CATTG | -      | --     | --    | IGR             | DEL | 0.586 | 12 | 17 |
| --        | chrX | 39116728 | G     | T      | --     | --    | IGR             | SNP | 0.365 | 33 | 19 |
| LOC286442 | chrX | 39166801 | A     | C      | --     | --    | RNA             | SNP | 0.577 | 22 | 30 |
| --        | chrX | 39274561 | A     | T      | --     | --    | IGR             | SNP | 0.208 | 19 | 5  |
| --        | chrX | 39304226 | T     | C      | --     | --    | IGR             | SNP | 0.179 | 23 | 5  |
| --        | chrX | 39386384 | C     | T      | --     | --    | IGR             | SNP | 0.143 | 30 | 5  |
| --        | chrX | 39742020 | C     | T      | --     | --    | IGR             | SNP | 0.174 | 38 | 8  |
| --        | chrX | 39754209 | T     | A      | --     | --    | IGR             | SNP | 0.149 | 40 | 7  |
| --        | chrX | 40094204 | T     | C      | --     | --    | IGR             | SNP | 0.241 | 22 | 7  |
| --        | chrX | 40098050 | C     | T      | --     | --    | IGR             | SNP | 0.308 | 9  | 4  |
| --        | chrX | 40117929 | G     | T      | --     | --    | IGR             | SNP | 0.186 | 48 | 11 |
| --        | chrX | 40368426 | G     | A      | --     | --    | IGR             | SNP | 0.319 | 32 | 15 |
| MED14     | chrX | 40581912 | A     | C      | --     | --    | Intron          | SNP | 0.282 | 28 | 11 |
| --        | chrX | 40718280 | G     | A      | --     | --    | IGR             | SNP | 0.318 | 15 | 7  |
| --        | chrX | 41183929 | TG    | -      | --     | --    | IGR             | DEL | 0.140 | 49 | 8  |
| DDX3X     | chrX | 41203919 | G     | A      | --     | --    | Intron          | SNP | 0.486 | 18 | 17 |
| CASK      | chrX | 41502429 | T     | C      | --     | --    | Intron          | SNP | 0.217 | 18 | 5  |
| CASK      | chrX | 41502430 | G     | A      | --     | --    | Intron          | SNP | 0.217 | 18 | 5  |
| CASK      | chrX | 41669555 | -     | TTGAAA | --     | --    | Intron          | INS | 0.143 | 18 | 3  |
| CASK      | chrX | 41677788 | C     | G      | --     | --    | Intron          | SNP | 0.279 | 31 | 12 |
| --        | chrX | 41939026 | G     | A      | --     | --    | IGR             | SNP | 0.317 | 28 | 13 |
| --        | chrX | 41939630 | A     | T      | --     | --    | IGR             | SNP | 0.278 | 39 | 15 |
| --        | chrX | 41964027 | G     | T      | --     | --    | IGR             | SNP | 0.697 | 10 | 23 |
| --        | chrX | 41999447 | C     | A      | --     | --    | IGR             | SNP | 0.297 | 26 | 11 |
| --        | chrX | 42057189 | G     | C      | --     | --    | IGR             | SNP | 0.606 | 13 | 20 |
| --        | chrX | 42280417 | C     | A      | --     | --    | IGR             | SNP | 0.244 | 31 | 10 |
| --        | chrX | 42813892 | G     | T      | --     | --    | IGR             | SNP | 0.214 | 22 | 6  |
| --        | chrX | 43038777 | T     | A      | --     | --    | IGR             | SNP | 0.135 | 32 | 5  |
| --        | chrX | 43257861 | G     | T      | --     | --    | IGR             | SNP | 0.158 | 16 | 3  |
| --        | chrX | 43455170 | A     | T      | --     | --    | IGR             | SNP | 0.178 | 37 | 8  |
| MAOB      | chrX | 43659534 | G     | A      | --     | --    | Intron          | SNP | 0.270 | 27 | 10 |
| MAOB      | chrX | 43676365 | -     | ATCT   | --     | --    | Intron          | INS | 0.450 | 22 | 18 |
| --        | chrX | 44514986 | T     | C      | --     | --    | IGR             | SNP | 0.158 | 32 | 6  |
| KDM6A     | chrX | 44833193 | A     | T      | --     | --    | Intron          | SNP | 0.188 | 26 | 6  |
| --        | chrX | 45606306 | G     | C      | --     | --    | IGR             | SNP | 0.300 | 7  | 3  |
| --        | chrX | 45844663 | T     | A      | --     | --    | IGR             | SNP | 0.467 | 16 | 14 |
| --        | chrX | 45958899 | G     | T      | --     | --    | IGR             | SNP | 0.393 | 17 | 11 |
| --        | chrX | 45969402 | T     | C      | --     | --    | IGR             | SNP | 0.174 | 19 | 4  |
| --        | chrX | 45994126 | T     | A      | --     | --    | IGR             | SNP | 0.586 | 12 | 17 |
| --        | chrX | 46181947 | G     | A      | --     | --    | IGR             | SNP | 0.333 | 38 | 19 |
| --        | chrX | 46273368 | TATG  | -      | --     | --    | IGR             | DEL | 0.250 | 12 | 4  |
| --        | chrX | 46274293 | G     | C      | --     | --    | IGR             | SNP | 0.240 | 19 | 6  |
| ZNF674    | chrX | 46361344 | TTA   | -      | --     | --    | Intron          | DEL | 0.118 | 30 | 4  |
| --        | chrX | 46464648 | G     | A      | --     | --    | IGR             | SNP | 0.192 | 21 | 5  |
| SLC9A7    | chrX | 46503733 | T     | C      | --     | --    | Intron          | SNP | 0.476 | 22 | 20 |
| SLC9A7    | chrX | 46548492 | C     | G      | --     | --    | Intron          | SNP | 0.318 | 15 | 7  |
| SLC9A7    | chrX | 46556239 | G     | A      | --     | --    | Intron          | SNP | 0.478 | 24 | 22 |
| --        | chrX | 46635221 | T     | C      | --     | --    | IGR             | SNP | 0.444 | 10 | 8  |
| --        | chrX | 46676877 | G     | A      | --     | --    | IGR             | SNP | 0.563 | 21 | 27 |
| --        | chrX | 46747261 | A     | T      | --     | --    | IGR             | SNP | 0.520 | 12 | 13 |
| PHF16     | chrX | 46878628 | G     | A      | --     | --    | Intron          | SNP | 0.158 | 48 | 9  |
| --        | chrX | 47164773 | C     | T      | --     | --    | IGR             | SNP | 0.257 | 26 | 9  |
| --        | chrX | 47172051 | G     | T      | --     | --    | IGR             | SNP | 0.235 | 13 | 4  |
| --        | chrX | 47192496 | G     | C      | --     | --    | IGR             | SNP | 0.114 | 39 | 5  |
| SYN1      | chrX | 47433824 | G     | A      | C1559T | S520F | Missense_mutati | SNP | 0.643 | 10 | 18 |
| --        | chrX | 47548783 | C     | A      | --     | --    | IGR             | SNP | 0.595 | 17 | 25 |
| --        | chrX | 47830071 | A     | G      | --     | --    | IGR             | SNP | 0.296 | 19 | 8  |
| SSX6      | chrX | 47968989 | C     | G      | --     | --    | RNA             | SNP | 0.400 | 18 | 12 |
| --        | chrX | 48058003 | A     | G      | --     | --    | IGR             | SNP | 0.231 | 20 | 6  |
| SSX3      | chrX | 48212798 | C     | G      | --     | --    | Intron          | SNP | 0.100 | 27 | 3  |
| --        | chrX | 48639605 | A     | G      | --     | --    | Intron          | SNP | 0.368 | 12 | 7  |
| PQBP1     | chrX | 48757353 | C     | G      | --     | --    | Intron          | SNP | 0.455 | 18 | 15 |
| PIM2      | chrX | 48776478 | C     | T      | --     | --    | 5'Flank         | SNP | 0.529 | 16 | 18 |
| --        | chrX | 49434832 | G     | A      | --     | --    | IGR             | SNP | 0.640 | 9  | 16 |
| --        | chrX | 49516128 | T     | C      | --     | --    | IGR             | SNP | 0.357 | 27 | 15 |
| --        | chrX | 49632290 | C     | A      | --     | --    | IGR             | SNP | 0.167 | 25 | 5  |
| CLCN5     | chrX | 49838920 | G     | C      | --     | --    | Intron          | SNP | 0.633 | 11 | 19 |
| --        | chrX | 49875517 | A     | C      | --     | --    | IGR             | SNP | 0.293 | 29 | 12 |

|          |      |          |    |    |                        |        |         |       |       |    |    |
|----------|------|----------|----|----|------------------------|--------|---------|-------|-------|----|----|
| --       | chrX | 49880592 | G  | A  | --                     | --     | IGR     | SNP   | 0.414 | 17 | 12 |
| DGKK     | chrX | 50214043 | G  | T  | --                     | --     | 5'Flank | SNP   | 0.296 | 19 | 8  |
| --       | chrX | 50235043 | G  | A  | --                     | --     | IGR     | SNP   | 0.167 | 30 | 6  |
| --       | chrX | 50327781 | G  | A  | --                     | --     | IGR     | SNP   | 0.225 | 31 | 9  |
| --       | chrX | 50706459 | G  | A  | --                     | --     | IGR     | SNP   | 0.147 | 29 | 5  |
| --       | chrX | 50829812 | T  | A  | --                     | --     | IGR     | SNP   | 0.711 | 11 | 27 |
| --       | chrX | 51105546 | C  | A  | --                     | --     | IGR     | SNP   | 0.308 | 9  | 4  |
| --       | chrX | 51317812 | C  | A  | --                     | --     | IGR     | SNP   | 0.167 | 35 | 7  |
| --       | chrX | 51367278 | C  | A  | --                     | --     | IGR     | SNP   | 0.222 | 28 | 8  |
| --       | chrX | 51392363 | A  | G  | --                     | --     | IGR     | SNP   | 0.333 | 6  | 3  |
| --       | chrX | 51704815 | AC | -  | --                     | --     | IGR     | DEL   | 0.176 | 14 | 3  |
| --       | chrX | 51776230 | G  | C  | --                     | --     | IGR     | SNP   | 0.256 | 32 | 11 |
| --       | chrX | 52070621 | T  | C  | --                     | --     | IGR     | SNP   | 0.200 | 32 | 8  |
| --       | chrX | 52950196 | G  | C  | --                     | --     | IGR     | SNP   | 0.300 | 21 | 9  |
| GPR173   | chrX | 53091289 | G  | A  | --                     | --     | Intron  | SNP   | 0.444 | 25 | 20 |
| --       | chrX | 53194175 | T  | A  | --                     | --     | IGR     | SNP   | 0.200 | 24 | 6  |
| HSD17B10 | chrX | 53461364 | G  | A  | --                     | --     | 5'Flank | SNP   | 0.536 | 26 | 30 |
| --       | chrX | 53547852 | C  | G  | --                     | --     | IGR     | SNP   | 0.219 | 25 | 7  |
| HUWE1    | chrX | 53606168 | -  | GC | --                     | --     | Intron  | INS   | 0.133 | 13 | 2  |
| HUWE1    | chrX | 53606367 | G  | A  | --                     | --     | Intron  | SNP   | 0.125 | 21 | 3  |
| --       | chrX | 53765584 | G  | A  | --                     | --     | IGR     | SNP   | 0.250 | 15 | 5  |
| --       | chrX | 53882702 | A  | G  | --                     | --     | IGR     | SNP   | 0.577 | 11 | 15 |
| --       | chrX | 53932774 | A  | T  | --                     | --     | IGR     | SNP   | 0.257 | 26 | 9  |
| --       | chrX | 53960734 | A  | T  | --                     | --     | IGR     | SNP   | 0.233 | 33 | 10 |
| PHF8     | chrX | 54011423 | C  | T  | G2367A,G231E789E,E772E | Silent | SNP     | 0.176 | 42    | 9  |    |
| FAM120C  | chrX | 54145124 | C  | T  | --                     | --     | Intron  | SNP   | 0.267 | 11 | 4  |
| --       | chrX | 54435359 | G  | A  | --                     | --     | IGR     | SNP   | 0.328 | 39 | 19 |
| --       | chrX | 54715333 | C  | A  | --                     | --     | IGR     | SNP   | 0.152 | 28 | 5  |
| --       | chrX | 54735792 | C  | A  | --                     | --     | IGR     | SNP   | 0.571 | 3  | 4  |
| ITIH5L   | chrX | 54822071 | C  | A  | --                     | --     | Intron  | SNP   | 0.324 | 25 | 12 |
| --       | chrX | 54941309 | TC | -  | --                     | --     | IGR     | DEL   | 0.176 | 14 | 3  |
| --       | chrX | 55111654 | -  | AC | --                     | --     | IGR     | INS   | 0.103 | 26 | 3  |
| --       | chrX | 55113439 | G  | T  | --                     | --     | IGR     | SNP   | 0.176 | 14 | 3  |
| --       | chrX | 55165977 | T  | A  | --                     | --     | IGR     | SNP   | 0.449 | 27 | 22 |
| --       | chrX | 55215432 | G  | C  | --                     | --     | IGR     | SNP   | 0.200 | 52 | 13 |
| --       | chrX | 55614082 | C  | T  | --                     | --     | IGR     | SNP   | 0.440 | 14 | 11 |
| --       | chrX | 55742351 | C  | A  | --                     | --     | IGR     | SNP   | 0.358 | 34 | 19 |
| --       | chrX | 55879589 | G  | A  | --                     | --     | IGR     | SNP   | 0.548 | 14 | 17 |
| --       | chrX | 55941010 | A  | T  | --                     | --     | IGR     | SNP   | 0.674 | 15 | 31 |
| --       | chrX | 55956802 | C  | G  | --                     | --     | IGR     | SNP   | 0.364 | 14 | 8  |
| --       | chrX | 56011670 | C  | G  | --                     | --     | IGR     | SNP   | 0.156 | 27 | 5  |
| --       | chrX | 56163053 | C  | T  | --                     | --     | IGR     | SNP   | 0.250 | 9  | 3  |
| KLF8     | chrX | 56262653 | C  | A  | --                     | --     | Intron  | SNP   | 0.578 | 19 | 26 |
| --       | chrX | 56900009 | T  | C  | --                     | --     | IGR     | SNP   | 0.692 | 4  | 9  |
| --       | chrX | 57071729 | C  | G  | --                     | --     | IGR     | SNP   | 0.310 | 20 | 9  |
| --       | chrX | 57106171 | C  | A  | --                     | --     | IGR     | SNP   | 0.290 | 22 | 9  |
| FAAH2    | chrX | 57314801 | G  | T  | --                     | --     | Intron  | SNP   | 0.214 | 11 | 3  |
| FAAH2    | chrX | 57354245 | G  | C  | --                     | --     | Intron  | SNP   | 0.563 | 14 | 18 |
| --       | chrX | 57585659 | C  | G  | --                     | --     | IGR     | SNP   | 0.179 | 32 | 7  |
| --       | chrX | 57797589 | -  | TG | --                     | --     | IGR     | INS   | 0.158 | 16 | 3  |
| --       | chrX | 57921194 | G  | A  | --                     | --     | IGR     | SNP   | 0.121 | 29 | 4  |
| --       | chrX | 57987435 | C  | A  | --                     | --     | IGR     | SNP   | 0.600 | 14 | 21 |
| --       | chrX | 58066809 | C  | T  | --                     | --     | IGR     | SNP   | 0.222 | 42 | 12 |
| --       | chrX | 58279296 | A  | T  | --                     | --     | IGR     | SNP   | 0.189 | 30 | 7  |
| --       | chrX | 58325390 | G  | A  | --                     | --     | IGR     | SNP   | 0.677 | 10 | 21 |
| --       | chrX | 58422833 | C  | G  | --                     | --     | IGR     | SNP   | 0.324 | 23 | 11 |
| --       | chrX | 61682109 | T  | A  | --                     | --     | IGR     | SNP   | 0.130 | 47 | 7  |
| --       | chrX | 61686527 | G  | T  | --                     | --     | IGR     | SNP   | 0.189 | 30 | 7  |
| --       | chrX | 61695371 | A  | G  | --                     | --     | IGR     | SNP   | 0.179 | 46 | 10 |
| --       | chrX | 61704027 | C  | T  | --                     | --     | IGR     | SNP   | 0.114 | 39 | 5  |
| --       | chrX | 61709098 | T  | C  | --                     | --     | IGR     | SNP   | 0.170 | 39 | 8  |
| --       | chrX | 61709533 | G  | C  | --                     | --     | IGR     | SNP   | 0.116 | 84 | 11 |
| --       | chrX | 61716271 | T  | C  | --                     | --     | IGR     | SNP   | 0.102 | 79 | 9  |
| --       | chrX | 61783102 | C  | G  | --                     | --     | IGR     | SNP   | 0.226 | 24 | 7  |
| --       | chrX | 61925197 | C  | A  | --                     | --     | IGR     | SNP   | 0.250 | 18 | 6  |
| --       | chrX | 61960047 | C  | G  | --                     | --     | IGR     | SNP   | 0.486 | 18 | 17 |
| --       | chrX | 61997349 | C  | T  | --                     | --     | IGR     | SNP   | 0.353 | 22 | 12 |
| --       | chrX | 62099474 | T  | A  | --                     | --     | IGR     | SNP   | 0.429 | 16 | 12 |
| --       | chrX | 62123519 | C  | A  | --                     | --     | IGR     | SNP   | 0.250 | 30 | 10 |
| --       | chrX | 62228900 | G  | A  | --                     | --     | IGR     | SNP   | 0.190 | 17 | 4  |
| --       | chrX | 62362386 | G  | A  | --                     | --     | IGR     | SNP   | 0.625 | 3  | 5  |
| --       | chrX | 62537527 | A  | T  | --                     | --     | IGR     | SNP   | 0.265 | 36 | 13 |
| --       | chrX | 62614489 | T  | C  | --                     | --     | IGR     | SNP   | 0.130 | 20 | 3  |
| --       | chrX | 62641204 | C  | G  | --                     | --     | IGR     | SNP   | 0.360 | 16 | 9  |
| --       | chrX | 62641546 | C  | G  | --                     | --     | IGR     | SNP   | 0.500 | 14 | 14 |
| LOC92249 | chrX | 62674114 | G  | T  | --                     | --     | RNA     | SNP   | 0.138 | 25 | 4  |
| --       | chrX | 62793600 | G  | C  | --                     | --     | IGR     | SNP   | 0.750 | 8  | 24 |
| --       | chrX | 63046700 | T  | C  | --                     | --     | IGR     | SNP   | 0.347 | 32 | 17 |
| --       | chrX | 63059882 | A  | G  | --                     | --     | IGR     | SNP   | 0.136 | 19 | 3  |
| --       | chrX | 63059893 | C  | A  | --                     | --     | IGR     | SNP   | 0.136 | 19 | 3  |

|        |      |          |     |    |    |    |                                         |     |       |    |    |
|--------|------|----------|-----|----|----|----|-----------------------------------------|-----|-------|----|----|
| --     | chrX | 63097368 | A   | T  | -- | -- | IGR                                     | SNP | 0.413 | 27 | 19 |
| --     | chrX | 63170043 | C   | A  | -- | -- | IGR                                     | SNP | 0.314 | 24 | 11 |
| --     | chrX | 63231223 | T   | G  | -- | -- | IGR                                     | SNP | 0.561 | 18 | 23 |
| --     | chrX | 63338152 | A   | G  | -- | -- | IGR                                     | SNP | 0.424 | 19 | 14 |
| MTMR8  | chrX | 63522323 | C   | A  | -- | -- | Intron                                  | SNP | 0.130 | 20 | 3  |
| MTMR8  | chrX | 63600909 | A   | G  | -- | -- | Intron                                  | SNP | 0.286 | 20 | 8  |
| --     | chrX | 63797139 | G   | T  | -- | -- | IGR                                     | SNP | 0.237 | 29 | 9  |
| --     | chrX | 63830512 | C   | T  | -- | -- | IGR                                     | SNP | 0.286 | 30 | 12 |
| --     | chrX | 63859576 | A   | G  | -- | -- | IGR                                     | SNP | 0.234 | 36 | 11 |
| --     | chrX | 63873928 | G   | T  | -- | -- | IGR                                     | SNP | 0.105 | 34 | 4  |
| --     | chrX | 63885732 | G   | A  | -- | -- | IGR                                     | SNP | 0.282 | 28 | 11 |
| --     | chrX | 63885733 | A   | T  | -- | -- | IGR                                     | SNP | 0.300 | 28 | 12 |
| --     | chrX | 64026601 | C   | A  | -- | -- | IGR                                     | SNP | 0.222 | 14 | 4  |
| ZC4H2  | chrX | 64141482 | G   | T  | -- | -- | Intron                                  | SNP | 0.209 | 34 | 9  |
| ZC4H2  | chrX | 64172448 | G   | A  | -- | -- | Intron                                  | SNP | 0.125 | 21 | 3  |
| ZC4H2  | chrX | 64191815 | G   | C  | -- | -- | Intron                                  | SNP | 0.579 | 16 | 22 |
| --     | chrX | 64369891 | T   | A  | -- | -- | IGR                                     | SNP | 0.654 | 9  | 17 |
| --     | chrX | 64823133 | C   | A  | -- | -- | IGR                                     | SNP | 0.225 | 31 | 9  |
| MSN    | chrX | 64895741 | C   | T  | -- | -- | Intron                                  | SNP | 0.294 | 24 | 10 |
| MSN    | chrX | 64909118 | T   | A  | -- | -- | Intron                                  | SNP | 0.648 | 19 | 35 |
| --     | chrX | 65058656 | C   | T  | -- | -- | IGR                                     | SNP | 0.329 | 49 | 24 |
| --     | chrX | 65150652 | C   | T  | -- | -- | IGR                                     | SNP | 0.259 | 20 | 7  |
| --     | chrX | 65221036 | C   | T  | -- | -- | IGR                                     | SNP | 0.281 | 23 | 9  |
| --     | chrX | 65280779 | A   | C  | -- | -- | IGR                                     | SNP | 0.195 | 33 | 8  |
| --     | chrX | 65379847 | G   | T  | -- | -- | IGR                                     | SNP | 0.400 | 21 | 14 |
| HEPH   | chrX | 65429387 | T   | C  | -- | -- | Intron                                  | SNP | 0.346 | 34 | 18 |
| --     | chrX | 65592619 | C   | T  | -- | -- | IGR                                     | SNP | 0.161 | 26 | 5  |
| --     | chrX | 65613105 | G   | A  | -- | -- | IGR                                     | SNP | 0.486 | 19 | 18 |
| --     | chrX | 65656856 | C   | A  | -- | -- | IGR                                     | SNP | 0.700 | 15 | 35 |
| --     | chrX | 65766807 | C   | T  | -- | -- | IGR                                     | SNP | 0.238 | 16 | 5  |
| --     | chrX | 65777194 | C   | G  | -- | -- | IGR                                     | SNP | 0.143 | 24 | 4  |
| --     | chrX | 65810858 | C   | T  | -- | -- | IGR                                     | SNP | 0.600 | 14 | 21 |
| --     | chrX | 65811546 | C   | G  | -- | -- | IGR                                     | SNP | 0.367 | 19 | 11 |
| --     | chrX | 65944002 | C   | A  | -- | -- | IGR                                     | SNP | 0.213 | 37 | 10 |
| --     | chrX | 66053922 | T   | A  | -- | -- | IGR                                     | SNP | 0.281 | 23 | 9  |
| --     | chrX | 66155945 | -   | TG | -- | -- | IGR                                     | INS | 0.111 | 16 | 2  |
| --     | chrX | 66173196 | -   | AC | -- | -- | IGR                                     | INS | 0.118 | 15 | 2  |
| --     | chrX | 66274884 | G   | C  | -- | -- | IGR                                     | SNP | 0.618 | 13 | 21 |
| --     | chrX | 66334960 | G   | C  | -- | -- | IGR                                     | SNP | 0.118 | 45 | 6  |
| --     | chrX | 66359810 | G   | T  | -- | -- | IGR                                     | SNP | 0.194 | 25 | 6  |
| --     | chrX | 66413096 | T   | C  | -- | -- | IGR                                     | SNP | 0.125 | 21 | 3  |
| --     | chrX | 66442448 | G   | A  | -- | -- | IGR                                     | SNP | 0.313 | 11 | 5  |
| --     | chrX | 66460554 | G   | A  | -- | -- | IGR                                     | SNP | 0.182 | 36 | 8  |
| --     | chrX | 66537200 | A   | T  | -- | -- | IGR                                     | SNP | 0.636 | 4  | 7  |
| --     | chrX | 66706775 | T   | G  | -- | -- | IGR                                     | SNP | 0.471 | 9  | 8  |
| AR     | chrX | 66922380 | A   | T  | -- | -- | Intron                                  | SNP | 0.135 | 32 | 5  |
| AR     | chrX | 66934798 | C   | T  | -- | -- | Intron                                  | SNP | 0.300 | 21 | 9  |
| --     | chrX | 67157941 | A   | C  | -- | -- | IGR                                     | SNP | 0.265 | 25 | 9  |
| --     | chrX | 67165546 | A   | T  | -- | -- | IGR                                     | SNP | 0.250 | 9  | 3  |
| OPHN1  | chrX | 67283426 | G   | C  | -- | -- | Intron                                  | SNP | 0.304 | 16 | 7  |
| OPHN1  | chrX | 67337550 | A   | T  | -- | -- | Intron                                  | SNP | 0.196 | 41 | 10 |
| OPHN1  | chrX | 67373076 | G   | A  | -- | -- | Intron                                  | SNP | 0.211 | 15 | 4  |
| OPHN1  | chrX | 67474880 | G   | A  | -- | -- | Intron                                  | SNP | 0.174 | 19 | 4  |
| OPHN1  | chrX | 67556255 | G   | T  | -- | -- | Intron                                  | SNP | 0.455 | 6  | 5  |
| --     | chrX | 67666598 | C   | T  | -- | -- | IGR                                     | SNP | 0.185 | 22 | 5  |
| --     | chrX | 67703960 | G   | T  | -- | -- | IGR                                     | SNP | 0.278 | 26 | 10 |
| YIPF6  | chrX | 67739061 | T   | G  | -- | -- | Intron                                  | SNP | 0.188 | 26 | 6  |
| STARD8 | chrX | 67888118 | C   | T  | -- | -- | Intron                                  | SNP | 0.100 | 27 | 3  |
| --     | chrX | 68150610 | CTG | -  | -- | -- | IGR                                     | DEL | 0.120 | 22 | 3  |
| --     | chrX | 68155718 | A   | G  | -- | -- | IGR                                     | SNP | 0.339 | 41 | 21 |
| --     | chrX | 68475136 | C   | G  | -- | -- | IGR                                     | SNP | 0.350 | 26 | 14 |
| --     | chrX | 68805548 | A   | G  | -- | -- | IGR                                     | SNP | 0.410 | 23 | 16 |
| --     | chrX | 68825258 | A   | G  | -- | -- | IGR                                     | SNP | 0.359 | 25 | 14 |
| EDA    | chrX | 68873378 | G   | T  | -- | -- | Intron                                  | SNP | 0.250 | 12 | 4  |
| EDA    | chrX | 68884726 | C   | A  | -- | -- | Intron                                  | SNP | 0.417 | 21 | 15 |
| EDA    | chrX | 68939981 | C   | T  | -- | -- | Intron                                  | SNP | 0.286 | 30 | 12 |
| EDA    | chrX | 69189383 | T   | C  | -- | -- | Intron                                  | SNP | 0.207 | 23 | 6  |
| EDA    | chrX | 69231515 | C   | G  | -- | -- | Intron                                  | SNP | 0.382 | 21 | 13 |
| TEX11  | chrX | 69978301 | T   | C  | -- | -- | Intron                                  | SNP | 0.656 | 11 | 21 |
| TEX11  | chrX | 70129022 | T   | A  | -- | -- | 5'Flank                                 | SNP | 0.214 | 11 | 3  |
| --     | chrX | 70188402 | T   | A  | -- | -- | IGR                                     | SNP | 0.182 | 27 | 6  |
| --     | chrX | 70239394 | T   | A  | -- | -- | IGR                                     | SNP | 0.282 | 28 | 11 |
| --     | chrX | 70240976 | A   | T  | -- | -- | IGR                                     | SNP | 0.500 | 29 | 29 |
| --     | chrX | 70276235 | T   | A  | -- | -- | IGR                                     | SNP | 0.300 | 14 | 6  |
| NLGN3  | chrX | 70387376 | C   | G  | -- | -- | C1429G,C136L477V,L457V, Missense_mutati | SNP | 0.508 | 32 | 33 |
| BCYRN1 | chrX | 70507969 | C   | T  | -- | -- | RNA                                     | SNP | 0.267 | 11 | 4  |
| BCYRN1 | chrX | 70676499 | C   | T  | -- | -- | RNA                                     | SNP | 0.167 | 15 | 3  |
| BCYRN1 | chrX | 70798761 | T   | G  | -- | -- | RNA                                     | SNP | 0.158 | 16 | 3  |
| BCYRN1 | chrX | 70832140 | A   | G  | -- | -- | RNA                                     | SNP | 0.188 | 13 | 3  |
| BCYRN1 | chrX | 70896952 | A   | G  | -- | -- | RNA                                     | SNP | 0.182 | 18 | 4  |

|             |      |          |   |    |    |    |         |     |       |    |    |
|-------------|------|----------|---|----|----|----|---------|-----|-------|----|----|
| NHSL2       | chrX | 71192929 | G | T  | -- | -- | Intron  | SNP | 0.333 | 44 | 22 |
| NHSL2       | chrX | 71357563 | G | C  | -- | -- | Intron  | SNP | 0.375 | 30 | 18 |
| ERCC6L,PIN4 | chrX | 71455743 | C | A  | -- | -- | Intron  | SNP | 0.118 | 30 | 4  |
| HDAC8       | chrX | 71651200 | A | C  | -- | -- | Intron  | SNP | 0.261 | 34 | 12 |
| HDAC8       | chrX | 71726417 | T | C  | -- | -- | Intron  | SNP | 0.641 | 14 | 25 |
| --          | chrX | 72098010 | C | T  | -- | -- | IGR     | SNP | 0.607 | 22 | 34 |
| --          | chrX | 72294825 | G | C  | -- | -- | IGR     | SNP | 0.286 | 25 | 10 |
| --          | chrX | 72311997 | C | T  | -- | -- | IGR     | SNP | 0.375 | 5  | 3  |
| --          | chrX | 72413810 | C | T  | -- | -- | IGR     | SNP | 0.415 | 24 | 17 |
| --          | chrX | 72595692 | G | T  | -- | -- | IGR     | SNP | 0.606 | 13 | 20 |
| --          | chrX | 72662405 | C | T  | -- | -- | IGR     | SNP | 0.438 | 18 | 14 |
| LOC139201   | chrX | 72750104 | G | A  | -- | -- | RNA     | SNP | 0.176 | 14 | 3  |
| CHIC1       | chrX | 72884143 | G | A  | -- | -- | Intron  | SNP | 0.184 | 31 | 7  |
| --          | chrX | 72962448 | C | T  | -- | -- | IGR     | SNP | 0.226 | 24 | 7  |
| FTX         | chrX | 73352662 | C | G  | -- | -- | RNA     | SNP | 0.674 | 15 | 31 |
| --          | chrX | 73639435 | C | A  | -- | -- | IGR     | SNP | 0.344 | 42 | 22 |
| SLC16A2     | chrX | 73687297 | G | T  | -- | -- | Intron  | SNP | 0.267 | 22 | 8  |
| --          | chrX | 74237022 | T | C  | -- | -- | IGR     | SNP | 0.500 | 16 | 16 |
| ABCB7       | chrX | 74335245 | C | T  | -- | -- | Intron  | SNP | 0.267 | 11 | 4  |
| --          | chrX | 74529094 | G | A  | -- | -- | IGR     | SNP | 0.192 | 21 | 5  |
| ZDHHC15     | chrX | 74617185 | A | C  | -- | -- | Intron  | SNP | 0.667 | 9  | 18 |
| ZDHHC15     | chrX | 74734549 | A | T  | -- | -- | Intron  | SNP | 0.245 | 40 | 13 |
| --          | chrX | 74757984 | C | T  | -- | -- | IGR     | SNP | 0.706 | 5  | 12 |
| --          | chrX | 75126263 | C | A  | -- | -- | IGR     | SNP | 0.257 | 26 | 9  |
| --          | chrX | 75250112 | G | A  | -- | -- | IGR     | SNP | 0.621 | 11 | 18 |
| --          | chrX | 75365856 | C | G  | -- | -- | IGR     | SNP | 0.222 | 35 | 10 |
| --          | chrX | 75389378 | C | A  | -- | -- | IGR     | SNP | 0.233 | 23 | 7  |
| --          | chrX | 75541368 | G | A  | -- | -- | IGR     | SNP | 0.317 | 28 | 13 |
| --          | chrX | 75597376 | G | T  | -- | -- | IGR     | SNP | 0.316 | 13 | 6  |
| --          | chrX | 76081767 | C | G  | -- | -- | IGR     | SNP | 0.400 | 24 | 16 |
| --          | chrX | 76166917 | A | G  | -- | -- | IGR     | SNP | 0.600 | 2  | 3  |
| --          | chrX | 76204480 | C | T  | -- | -- | IGR     | SNP | 0.200 | 12 | 3  |
| --          | chrX | 76223062 | A | T  | -- | -- | IGR     | SNP | 0.231 | 30 | 9  |
| --          | chrX | 76416333 | C | A  | -- | -- | IGR     | SNP | 0.345 | 19 | 10 |
| --          | chrX | 76750275 | C | T  | -- | -- | IGR     | SNP | 0.620 | 19 | 31 |
| ATRX        | chrX | 76762402 | G | T  | -- | -- | 3'UTR   | SNP | 0.267 | 11 | 4  |
| ATRX        | chrX | 76785878 | C | T  | -- | -- | Intron  | SNP | 0.680 | 8  | 17 |
| ATRX        | chrX | 77003628 | C | T  | -- | -- | Intron  | SNP | 0.138 | 25 | 4  |
| ATRX        | chrX | 77015740 | C | A  | -- | -- | Intron  | SNP | 0.250 | 15 | 5  |
| ATRX        | chrX | 77019254 | T | A  | -- | -- | Intron  | SNP | 0.367 | 19 | 11 |
| --          | chrX | 77072938 | T | A  | -- | -- | IGR     | SNP | 0.185 | 22 | 5  |
| MAGT1       | chrX | 77088357 | G | A  | -- | -- | Intron  | SNP | 0.333 | 8  | 4  |
| MAGT1       | chrX | 77151235 | T | A  | -- | -- | 5'Flank | SNP | 0.220 | 32 | 9  |
| COX7B       | chrX | 77158525 | G | T  | -- | -- | Intron  | SNP | 0.172 | 24 | 5  |
| --          | chrX | 77424918 | C | T  | -- | -- | IGR     | SNP | 0.357 | 18 | 10 |
| --          | chrX | 77424919 | T | C  | -- | -- | IGR     | SNP | 0.357 | 18 | 10 |
| --          | chrX | 77522984 | G | T  | -- | -- | IGR     | SNP | 0.174 | 19 | 4  |
| CYSLTR1     | chrX | 77570794 | G | C  | -- | -- | Intron  | SNP | 0.511 | 22 | 23 |
| --          | chrX | 77928213 | C | G  | -- | -- | IGR     | SNP | 0.275 | 29 | 11 |
| --          | chrX | 77996414 | C | G  | -- | -- | IGR     | SNP | 0.157 | 43 | 8  |
| --          | chrX | 78051893 | T | G  | -- | -- | IGR     | SNP | 0.258 | 23 | 8  |
| --          | chrX | 78451621 | C | T  | -- | -- | IGR     | SNP | 0.366 | 26 | 15 |
| --          | chrX | 78549146 | - | GT | -- | -- | IGR     | INS | 0.410 | 23 | 16 |
| ITM2A       | chrX | 78622440 | C | T  | -- | -- | Intron  | SNP | 0.316 | 26 | 12 |
| --          | chrX | 78669662 | C | T  | -- | -- | IGR     | SNP | 0.320 | 17 | 8  |
| --          | chrX | 78679798 | A | T  | -- | -- | IGR     | SNP | 0.333 | 18 | 9  |
| --          | chrX | 78777774 | C | A  | -- | -- | IGR     | SNP | 0.222 | 14 | 4  |
| --          | chrX | 78805112 | A | T  | -- | -- | IGR     | SNP | 0.308 | 9  | 4  |
| --          | chrX | 78826613 | A | G  | -- | -- | IGR     | SNP | 0.241 | 41 | 13 |
| --          | chrX | 79025924 | T | C  | -- | -- | IGR     | SNP | 0.417 | 7  | 5  |
| --          | chrX | 79071468 | A | T  | -- | -- | IGR     | SNP | 0.222 | 14 | 4  |
| --          | chrX | 79206187 | T | A  | -- | -- | IGR     | SNP | 0.441 | 19 | 15 |
| --          | chrX | 79312810 | C | A  | -- | -- | IGR     | SNP | 0.308 | 9  | 4  |
| --          | chrX | 79414132 | A | T  | -- | -- | IGR     | SNP | 0.167 | 20 | 4  |
| --          | chrX | 79432689 | G | T  | -- | -- | IGR     | SNP | 0.273 | 24 | 9  |
| --          | chrX | 79558755 | T | C  | -- | -- | IGR     | SNP | 0.432 | 21 | 16 |
| FAM46D      | chrX | 79653280 | A | C  | -- | -- | Intron  | SNP | 0.150 | 17 | 3  |
| FAM46D      | chrX | 79690283 | G | T  | -- | -- | Intron  | SNP | 0.160 | 21 | 4  |
| --          | chrX | 79714771 | C | G  | -- | -- | IGR     | SNP | 0.321 | 19 | 9  |
| --          | chrX | 79772049 | A | T  | -- | -- | IGR     | SNP | 0.433 | 17 | 13 |
| BRWD3       | chrX | 79943472 | C | A  | -- | -- | Intron  | SNP | 0.139 | 31 | 5  |
| BRWD3       | chrX | 79986756 | A | G  | -- | -- | Intron  | SNP | 0.280 | 18 | 7  |
| --          | chrX | 80195714 | C | T  | -- | -- | IGR     | SNP | 0.130 | 20 | 3  |
| --          | chrX | 80195729 | G | T  | -- | -- | IGR     | SNP | 0.176 | 14 | 3  |
| HMG5        | chrX | 80406927 | T | C  | -- | -- | Intron  | SNP | 0.250 | 12 | 4  |
| HMG5        | chrX | 80406928 | A | G  | -- | -- | Intron  | SNP | 0.250 | 12 | 4  |
| --          | chrX | 80682489 | G | A  | -- | -- | IGR     | SNP | 0.485 | 17 | 16 |
| --          | chrX | 80785201 | C | G  | -- | -- | IGR     | SNP | 0.452 | 17 | 14 |
| --          | chrX | 80871694 | C | T  | -- | -- | IGR     | SNP | 0.341 | 29 | 15 |
| --          | chrX | 81070595 | T | C  | -- | -- | IGR     | SNP | 0.452 | 23 | 19 |

|        |      |          |       |     |    |    |        |     |       |    |    |
|--------|------|----------|-------|-----|----|----|--------|-----|-------|----|----|
| --     | chrX | 81247923 | C     | A   | -- | -- | IGR    | SNP | 0.579 | 8  | 11 |
| --     | chrX | 81298692 | A     | C   | -- | -- | IGR    | SNP | 0.209 | 34 | 9  |
| --     | chrX | 81359588 | T     | A   | -- | -- | IGR    | SNP | 0.314 | 24 | 11 |
| --     | chrX | 81373812 | A     | C   | -- | -- | IGR    | SNP | 0.200 | 24 | 6  |
| --     | chrX | 81538451 | G     | A   | -- | -- | IGR    | SNP | 0.433 | 17 | 13 |
| --     | chrX | 81549358 | G     | A   | -- | -- | IGR    | SNP | 0.344 | 21 | 11 |
| --     | chrX | 81625328 | G     | T   | -- | -- | IGR    | SNP | 0.204 | 39 | 10 |
| --     | chrX | 81827516 | G     | A   | -- | -- | IGR    | SNP | 0.750 | 6  | 18 |
| --     | chrX | 81897645 | C     | A   | -- | -- | IGR    | SNP | 0.211 | 15 | 4  |
| --     | chrX | 81926512 | G     | A   | -- | -- | IGR    | SNP | 0.643 | 10 | 18 |
| --     | chrX | 81937380 | C     | T   | -- | -- | IGR    | SNP | 0.622 | 14 | 23 |
| --     | chrX | 81965385 | AGT   | -   | -- | -- | IGR    | DEL | 0.161 | 26 | 5  |
| --     | chrX | 82010213 | C     | T   | -- | -- | IGR    | SNP | 0.234 | 36 | 11 |
| --     | chrX | 82044754 | C     | G   | -- | -- | IGR    | SNP | 0.143 | 24 | 4  |
| --     | chrX | 82071936 | C     | G   | -- | -- | IGR    | SNP | 0.371 | 22 | 13 |
| --     | chrX | 82300278 | T     | C   | -- | -- | IGR    | SNP | 0.649 | 13 | 24 |
| --     | chrX | 82307627 | A     | G   | -- | -- | IGR    | SNP | 0.344 | 21 | 11 |
| --     | chrX | 82431861 | T     | C   | -- | -- | IGR    | SNP | 0.303 | 23 | 10 |
| --     | chrX | 82503595 | A     | C   | -- | -- | IGR    | SNP | 0.327 | 33 | 16 |
| --     | chrX | 82520998 | G     | A   | -- | -- | IGR    | SNP | 0.231 | 20 | 6  |
| --     | chrX | 82609851 | CTT   | -   | -- | -- | IGR    | DEL | 0.120 | 22 | 3  |
| --     | chrX | 82684667 | A     | T   | -- | -- | IGR    | SNP | 0.320 | 17 | 8  |
| --     | chrX | 82902765 | T     | G   | -- | -- | IGR    | SNP | 0.200 | 12 | 3  |
| --     | chrX | 83013742 | G     | T   | -- | -- | IGR    | SNP | 0.370 | 17 | 10 |
| --     | chrX | 83079894 | C     | A   | -- | -- | IGR    | SNP | 0.600 | 8  | 12 |
| CYLC1  | chrX | 83132575 | G     | A   | -- | -- | Intron | SNP | 0.481 | 14 | 13 |
| --     | chrX | 83242582 | A     | T   | -- | -- | IGR    | SNP | 0.458 | 13 | 11 |
| --     | chrX | 83514149 | G     | T   | -- | -- | IGR    | SNP | 0.238 | 32 | 10 |
| HDX    | chrX | 83599805 | T     | A   | -- | -- | Intron | SNP | 0.103 | 35 | 4  |
| HDX    | chrX | 83724620 | T     | C   | -- | -- | Intron | SNP | 0.634 | 15 | 26 |
| --     | chrX | 83788573 | T     | A   | -- | -- | IGR    | SNP | 0.227 | 34 | 10 |
| --     | chrX | 84383757 | G     | T   | -- | -- | IGR    | SNP | 0.750 | 4  | 12 |
| ZNF711 | chrX | 84501599 | G     | A   | -- | -- | Intron | SNP | 0.588 | 21 | 30 |
| --     | chrX | 84659086 | G     | C   | -- | -- | IGR    | SNP | 0.385 | 16 | 10 |
| --     | chrX | 84659776 | C     | T   | -- | -- | IGR    | SNP | 0.364 | 7  | 4  |
| --     | chrX | 84939700 | C     | A   | -- | -- | IGR    | SNP | 0.500 | 18 | 18 |
| --     | chrX | 85008647 | G     | A   | -- | -- | IGR    | SNP | 0.429 | 8  | 6  |
| --     | chrX | 85094241 | A     | C   | -- | -- | IGR    | SNP | 0.618 | 13 | 21 |
| CHM    | chrX | 85263566 | ATTAT | -   | -- | -- | Intron | DEL | 0.229 | 27 | 8  |
| DACH2  | chrX | 85777473 | T     | C   | -- | -- | Intron | SNP | 0.293 | 29 | 12 |
| DACH2  | chrX | 85811202 | C     | A   | -- | -- | Intron | SNP | 0.263 | 28 | 10 |
| DACH2  | chrX | 85954411 | CA    | -   | -- | -- | Intron | DEL | 0.367 | 31 | 18 |
| --     | chrX | 86126313 | AAT   | -   | -- | -- | IGR    | DEL | 0.154 | 22 | 4  |
| --     | chrX | 86137413 | C     | G   | -- | -- | IGR    | SNP | 0.325 | 27 | 13 |
| --     | chrX | 86226222 | A     | T   | -- | -- | IGR    | SNP | 0.364 | 7  | 4  |
| --     | chrX | 86241743 | A     | T   | -- | -- | IGR    | SNP | 0.148 | 23 | 4  |
| --     | chrX | 86287490 | G     | A   | -- | -- | IGR    | SNP | 0.417 | 7  | 5  |
| --     | chrX | 86306290 | C     | G   | -- | -- | IGR    | SNP | 0.650 | 14 | 26 |
| --     | chrX | 86463688 | C     | A   | -- | -- | IGR    | SNP | 0.278 | 26 | 10 |
| --     | chrX | 86545458 | G     | C   | -- | -- | IGR    | SNP | 0.421 | 11 | 8  |
| --     | chrX | 86545776 | -     | TTA | -- | -- | IGR    | INS | 0.111 | 16 | 2  |
| KLHL4  | chrX | 86791990 | C     | A   | -- | -- | Intron | SNP | 0.286 | 20 | 8  |
| KLHL4  | chrX | 86862624 | C     | G   | -- | -- | Intron | SNP | 0.704 | 8  | 19 |
| KLHL4  | chrX | 86894872 | -     | CA  | -- | -- | Intron | INS | 0.107 | 25 | 3  |
| KLHL4  | chrX | 86918038 | TG    | -   | -- | -- | Intron | DEL | 0.143 | 12 | 2  |
| --     | chrX | 86975409 | G     | C   | -- | -- | IGR    | SNP | 0.276 | 21 | 8  |
| --     | chrX | 87022529 | C     | A   | -- | -- | IGR    | SNP | 0.400 | 18 | 12 |
| --     | chrX | 87269858 | A     | T   | -- | -- | IGR    | SNP | 0.314 | 24 | 11 |
| --     | chrX | 87299323 | G     | A   | -- | -- | IGR    | SNP | 0.269 | 19 | 7  |
| --     | chrX | 87305593 | G     | C   | -- | -- | IGR    | SNP | 0.548 | 19 | 23 |
| --     | chrX | 87324812 | A     | C   | -- | -- | IGR    | SNP | 0.300 | 21 | 9  |
| --     | chrX | 87362846 | G     | A   | -- | -- | IGR    | SNP | 0.414 | 17 | 12 |
| --     | chrX | 87455460 | T     | C   | -- | -- | IGR    | SNP | 0.429 | 8  | 6  |
| --     | chrX | 87514715 | C     | G   | -- | -- | IGR    | SNP | 0.311 | 31 | 14 |
| --     | chrX | 87718771 | T     | G   | -- | -- | IGR    | SNP | 0.392 | 31 | 20 |
| --     | chrX | 87822360 | C     | A   | -- | -- | IGR    | SNP | 0.311 | 31 | 14 |
| --     | chrX | 87837803 | G     | A   | -- | -- | IGR    | SNP | 0.190 | 17 | 4  |
| --     | chrX | 87899959 | T     | G   | -- | -- | IGR    | SNP | 0.105 | 34 | 4  |
| --     | chrX | 88068784 | A     | G   | -- | -- | IGR    | SNP | 0.639 | 13 | 23 |
| --     | chrX | 88071857 | T     | G   | -- | -- | IGR    | SNP | 0.286 | 20 | 8  |
| --     | chrX | 88246896 | C     | T   | -- | -- | IGR    | SNP | 0.387 | 19 | 12 |
| --     | chrX | 88246920 | C     | A   | -- | -- | IGR    | SNP | 0.438 | 18 | 14 |
| --     | chrX | 88279329 | C     | A   | -- | -- | IGR    | SNP | 0.636 | 16 | 28 |
| --     | chrX | 88319557 | A     | T   | -- | -- | IGR    | SNP | 0.273 | 16 | 6  |
| --     | chrX | 88339279 | A     | G   | -- | -- | IGR    | SNP | 0.500 | 15 | 15 |
| --     | chrX | 88461706 | G     | A   | -- | -- | IGR    | SNP | 0.157 | 43 | 8  |
| --     | chrX | 88481093 | A     | T   | -- | -- | IGR    | SNP | 0.109 | 41 | 5  |
| --     | chrX | 88682040 | ATAT  | -   | -- | -- | IGR    | DEL | 0.111 | 16 | 2  |
| --     | chrX | 88730191 | G     | T   | -- | -- | IGR    | SNP | 0.333 | 24 | 12 |
| --     | chrX | 88781671 | -     | CA  | -- | -- | IGR    | INS | 0.313 | 22 | 10 |

|                |      |          |     |        |        |       |                 |     |       |    |    |
|----------------|------|----------|-----|--------|--------|-------|-----------------|-----|-------|----|----|
| --             | chrX | 88917526 | T   | C      | --     | --    | IGR             | SNP | 0.344 | 21 | 11 |
| --             | chrX | 89046768 | G   | A      | --     | --    | IGR             | SNP | 0.367 | 19 | 11 |
| --             | chrX | 89060737 | G   | T      | --     | --    | IGR             | SNP | 0.190 | 34 | 8  |
| --             | chrX | 89095490 | A   | T      | --     | --    | IGR             | SNP | 0.333 | 8  | 4  |
| --             | chrX | 89211298 | G   | C      | --     | --    | IGR             | SNP | 0.194 | 25 | 6  |
| --             | chrX | 89226869 | G   | A      | --     | --    | IGR             | SNP | 0.282 | 28 | 11 |
| --             | chrX | 89235410 | A   | C      | --     | --    | IGR             | SNP | 0.200 | 28 | 7  |
| --             | chrX | 89270700 | T   | C      | --     | --    | IGR             | SNP | 0.207 | 23 | 6  |
| --             | chrX | 89435911 | C   | A      | --     | --    | IGR             | SNP | 0.286 | 25 | 10 |
| --             | chrX | 89437573 | C   | T      | --     | --    | IGR             | SNP | 0.297 | 26 | 11 |
| --             | chrX | 89445943 | G   | T      | --     | --    | IGR             | SNP | 0.206 | 27 | 7  |
| --             | chrX | 89787191 | C   | A      | --     | --    | IGR             | SNP | 0.310 | 29 | 13 |
| --             | chrX | 89793088 | G   | C      | --     | --    | IGR             | SNP | 0.533 | 7  | 8  |
| --             | chrX | 90105582 | CT  | -      | --     | --    | IGR             | DEL | 0.429 | 16 | 12 |
| --             | chrX | 90120071 | C   | G      | --     | --    | IGR             | SNP | 0.250 | 45 | 15 |
| --             | chrX | 90379426 | C   | T      | --     | --    | IGR             | SNP | 0.264 | 39 | 14 |
| --             | chrX | 90445365 | C   | G      | --     | --    | IGR             | SNP | 0.500 | 15 | 15 |
| --             | chrX | 90490907 | C   | A      | --     | --    | IGR             | SNP | 0.222 | 14 | 4  |
| <i>PABPC5</i>  | chrX | 90691633 | G   | C      | G1057C | E353Q | Missense_mutati | SNP | 0.600 | 12 | 18 |
| --             | chrX | 90959193 | C   | A      | --     | --    | IGR             | SNP | 0.370 | 29 | 17 |
| <i>PCDH11X</i> | chrX | 91078164 | A   | T      | --     | --    | Intron          | SNP | 0.273 | 8  | 3  |
| <i>PCDH11X</i> | chrX | 91121481 | G   | A      | --     | --    | Intron          | SNP | 0.239 | 35 | 11 |
| <i>PCDH11X</i> | chrX | 91162413 | G   | C      | --     | --    | Intron          | SNP | 0.273 | 8  | 3  |
| <i>PCDH11X</i> | chrX | 91430133 | C   | T      | --     | --    | Intron          | SNP | 0.273 | 24 | 9  |
| <i>PCDH11X</i> | chrX | 91489489 | G   | T      | --     | --    | Intron          | SNP | 0.297 | 26 | 11 |
| <i>PCDH11X</i> | chrX | 91504340 | A   | C      | --     | --    | Intron          | SNP | 0.512 | 21 | 22 |
| <i>PCDH11X</i> | chrX | 91627548 | G   | A      | --     | --    | Intron          | SNP | 0.484 | 16 | 15 |
| <i>PCDH11X</i> | chrX | 91641517 | G   | A      | --     | --    | Intron          | SNP | 0.412 | 20 | 14 |
| --             | chrX | 91907545 | T   | A      | --     | --    | IGR             | SNP | 0.412 | 20 | 14 |
| --             | chrX | 92044231 | A   | G      | --     | --    | IGR             | SNP | 0.327 | 33 | 16 |
| --             | chrX | 92079652 | G   | A      | --     | --    | IGR             | SNP | 0.111 | 24 | 3  |
| --             | chrX | 92081524 | -   | CATTTT | --     | --    | IGR             | INS | 0.130 | 20 | 3  |
| --             | chrX | 92096819 | G   | A      | --     | --    | IGR             | SNP | 0.703 | 11 | 26 |
| --             | chrX | 92129174 | T   | A      | --     | --    | IGR             | SNP | 0.189 | 30 | 7  |
| --             | chrX | 92147959 | T   | G      | --     | --    | IGR             | SNP | 0.296 | 19 | 8  |
| --             | chrX | 92153661 | C   | T      | --     | --    | IGR             | SNP | 0.121 | 29 | 4  |
| --             | chrX | 92220751 | A   | C      | --     | --    | IGR             | SNP | 0.519 | 13 | 14 |
| --             | chrX | 92321175 | T   | G      | --     | --    | IGR             | SNP | 0.286 | 10 | 4  |
| --             | chrX | 92651404 | A   | T      | --     | --    | IGR             | SNP | 0.375 | 20 | 12 |
| --             | chrX | 92687547 | T   | C      | --     | --    | IGR             | SNP | 0.133 | 39 | 6  |
| --             | chrX | 92726756 | G   | C      | --     | --    | IGR             | SNP | 0.676 | 11 | 23 |
| --             | chrX | 92816322 | G   | A      | --     | --    | IGR             | SNP | 0.625 | 15 | 25 |
| --             | chrX | 93022694 | C   | T      | --     | --    | IGR             | SNP | 0.485 | 17 | 16 |
| --             | chrX | 93074723 | CT  | -      | --     | --    | IGR             | DEL | 0.269 | 19 | 7  |
| --             | chrX | 93380828 | T   | A      | --     | --    | IGR             | SNP | 0.400 | 24 | 16 |
| --             | chrX | 93492081 | T   | G      | --     | --    | IGR             | SNP | 0.190 | 17 | 4  |
| --             | chrX | 93535081 | C   | T      | --     | --    | IGR             | SNP | 0.300 | 7  | 3  |
| --             | chrX | 93880459 | -   | AT     | --     | --    | IGR             | INS | 0.195 | 33 | 8  |
| --             | chrX | 93956524 | T   | A      | --     | --    | IGR             | SNP | 0.286 | 10 | 4  |
| --             | chrX | 94038439 | C   | G      | --     | --    | IGR             | SNP | 0.240 | 19 | 6  |
| --             | chrX | 94120082 | T   | C      | --     | --    | IGR             | SNP | 0.222 | 14 | 4  |
| --             | chrX | 94120226 | A   | G      | --     | --    | IGR             | SNP | 0.217 | 18 | 5  |
| --             | chrX | 94247898 | T   | A      | --     | --    | IGR             | SNP | 0.533 | 14 | 16 |
| --             | chrX | 94428859 | CA  | -      | --     | --    | IGR             | DEL | 0.537 | 19 | 22 |
| --             | chrX | 94469419 | -   | AAAG   | --     | --    | IGR             | INS | 0.158 | 16 | 3  |
| --             | chrX | 94555019 | TTA | -      | --     | --    | IGR             | DEL | 0.125 | 14 | 2  |
| --             | chrX | 94560379 | T   | A      | --     | --    | IGR             | SNP | 0.345 | 19 | 10 |
| --             | chrX | 94600413 | C   | A      | --     | --    | IGR             | SNP | 0.147 | 29 | 5  |
| --             | chrX | 94602863 | G   | A      | --     | --    | IGR             | SNP | 0.125 | 21 | 3  |
| --             | chrX | 94692581 | AT  | -      | --     | --    | IGR             | DEL | 0.632 | 14 | 24 |
| --             | chrX | 94738615 | GTA | -      | --     | --    | IGR             | DEL | 0.143 | 18 | 3  |
| --             | chrX | 94751259 | AGT | -      | --     | --    | IGR             | DEL | 0.103 | 26 | 3  |
| --             | chrX | 94938263 | A   | G      | --     | --    | IGR             | SNP | 0.190 | 17 | 4  |
| --             | chrX | 95103084 | C   | T      | --     | --    | IGR             | SNP | 0.263 | 28 | 10 |
| --             | chrX | 95503929 | G   | C      | --     | --    | IGR             | SNP | 0.619 | 16 | 26 |
| --             | chrX | 95705613 | T   | C      | --     | --    | IGR             | SNP | 0.585 | 17 | 24 |
| --             | chrX | 95932528 | C   | G      | --     | --    | IGR             | SNP | 0.316 | 26 | 12 |
| <i>DIAPH2</i>  | chrX | 96295190 | C   | T      | --     | --    | Intron          | SNP | 0.222 | 14 | 4  |
| <i>DIAPH2</i>  | chrX | 96333905 | G   | C      | --     | --    | Intron          | SNP | 0.195 | 33 | 8  |
| <i>DIAPH2</i>  | chrX | 96448006 | C   | T      | --     | --    | Intron          | SNP | 0.429 | 12 | 9  |
| <i>DIAPH2</i>  | chrX | 96487748 | T   | C      | --     | --    | Intron          | SNP | 0.620 | 19 | 31 |
| <i>DIAPH2</i>  | chrX | 96598563 | G   | A      | --     | --    | Intron          | SNP | 0.167 | 30 | 6  |
| <i>DIAPH2</i>  | chrX | 96723654 | AAC | -      | --     | --    | Intron          | DEL | 0.105 | 34 | 4  |
| <i>DIAPH2</i>  | chrX | 96726908 | C   | A      | --     | --    | Intron          | SNP | 0.432 | 21 | 16 |
| <i>DIAPH2</i>  | chrX | 96818283 | A   | G      | --     | --    | Intron          | SNP | 0.208 | 19 | 5  |
| --             | chrX | 97300270 | G   | A      | --     | --    | IGR             | SNP | 0.387 | 19 | 12 |
| --             | chrX | 97411473 | C   | A      | --     | --    | IGR             | SNP | 0.125 | 35 | 5  |
| --             | chrX | 97448862 | G   | A      | --     | --    | IGR             | SNP | 0.243 | 28 | 9  |
| --             | chrX | 97458479 | G   | A      | --     | --    | IGR             | SNP | 0.364 | 21 | 12 |
| --             | chrX | 97476459 | A   | T      | --     | --    | IGR             | SNP | 0.125 | 42 | 6  |

|            |      |           |     |       |      |     |                 |     |       |    |    |
|------------|------|-----------|-----|-------|------|-----|-----------------|-----|-------|----|----|
| --         | chrX | 97528306  | GGT | -     | --   | --  | IGR             | DEL | 0.108 | 33 | 4  |
| --         | chrX | 97671629  | T   | C     | --   | --  | IGR             | SNP | 0.227 | 17 | 5  |
| --         | chrX | 97709610  | C   | T     | --   | --  | IGR             | SNP | 0.553 | 17 | 21 |
| --         | chrX | 97783616  | A   | T     | --   | --  | IGR             | SNP | 0.150 | 17 | 3  |
| --         | chrX | 97845375  | C   | A     | --   | --  | IGR             | SNP | 0.200 | 24 | 6  |
| --         | chrX | 97880590  | -   | TA    | --   | --  | IGR             | INS | 0.133 | 13 | 2  |
| --         | chrX | 97887378  | C   | A     | --   | --  | IGR             | SNP | 0.364 | 35 | 20 |
| --         | chrX | 97933132  | C   | T     | --   | --  | IGR             | SNP | 0.323 | 21 | 10 |
| --         | chrX | 98019493  | G   | T     | --   | --  | IGR             | SNP | 0.276 | 21 | 8  |
| --         | chrX | 98138144  | C   | G     | --   | --  | IGR             | SNP | 0.657 | 12 | 23 |
| --         | chrX | 98332572  | C   | T     | --   | --  | IGR             | SNP | 0.286 | 30 | 12 |
| --         | chrX | 98559689  | -   | CGATA | --   | --  | IGR             | INS | 0.286 | 30 | 12 |
| --         | chrX | 98682823  | GTA | -     | --   | --  | IGR             | DEL | 0.118 | 15 | 2  |
| LOC442459  | chrX | 98733293  | G   | C     | --   | --  | RNA             | SNP | 0.500 | 5  | 5  |
| LOC442459  | chrX | 98891560  | A   | G     | --   | --  | RNA             | SNP | 0.286 | 15 | 6  |
| LOC442459  | chrX | 98917636  | AGT | -     | --   | --  | RNA             | DEL | 0.167 | 15 | 3  |
| LOC442459  | chrX | 99054119  | A   | C     | --   | --  | RNA             | SNP | 0.623 | 23 | 38 |
| --         | chrX | 99293107  | T   | A     | --   | --  | IGR             | SNP | 0.217 | 47 | 13 |
| --         | chrX | 99532915  | C   | T     | --   | --  | IGR             | SNP | 0.409 | 26 | 18 |
| PCDH19     | chrX | 99631233  | C   | A     | --   | --  | Intron          | SNP | 0.250 | 12 | 4  |
| --         | chrX | 99751733  | A   | G     | --   | --  | IGR             | SNP | 0.250 | 21 | 7  |
| --         | chrX | 99764132  | G   | C     | --   | --  | IGR             | SNP | 0.278 | 26 | 10 |
| TNMD       | chrX | 99841020  | G   | T     | --   | --  | Intron          | SNP | 0.250 | 27 | 9  |
| --         | chrX | 99863642  | T   | C     | --   | --  | IGR             | SNP | 0.541 | 17 | 20 |
| NOX1       | chrX | 100129115 | A   | C     | T14G | V5G | Missense_mutati | SNP | 0.351 | 24 | 13 |
| --         | chrX | 100150544 | G   | A     | --   | --  | IGR             | SNP | 0.561 | 25 | 32 |
| --         | chrX | 100468010 | G   | T     | --   | --  | IGR             | SNP | 0.160 | 21 | 4  |
| --         | chrX | 100565776 | GAT | -     | --   | --  | IGR             | DEL | 0.111 | 24 | 3  |
| ARMCX4     | chrX | 100674942 | T   | C     | --   | --  | RNA             | SNP | 0.279 | 31 | 12 |
| --         | chrX | 100945895 | GGA | -     | --   | --  | IGR             | DEL | 0.176 | 14 | 3  |
| --         | chrX | 101055965 | C   | T     | --   | --  | IGR             | SNP | 0.233 | 23 | 7  |
| --         | chrX | 101080681 | G   | T     | --   | --  | IGR             | SNP | 0.588 | 21 | 30 |
| ZMAT1      | chrX | 101140473 | G   | A     | --   | --  | Intron          | SNP | 0.133 | 26 | 4  |
| --         | chrX | 101207688 | C   | G     | --   | --  | IGR             | SNP | 0.222 | 21 | 6  |
| --         | chrX | 101296389 | C   | T     | --   | --  | IGR             | SNP | 0.476 | 11 | 10 |
| --         | chrX | 101360706 | C   | A     | --   | --  | IGR             | SNP | 0.200 | 16 | 4  |
| --         | chrX | 101429979 | G   | T     | --   | --  | IGR             | SNP | 0.780 | 9  | 32 |
| --         | chrX | 101599806 | CAT | -     | --   | --  | IGR             | DEL | 0.121 | 29 | 4  |
| ARMCX5-GPF | chrX | 101960225 | TA  | -     | --   | --  | Intron          | DEL | 0.233 | 33 | 10 |
| --         | chrX | 102154186 | C   | G     | --   | --  | IGR             | SNP | 0.355 | 20 | 11 |
| --         | chrX | 102154430 | C   | T     | --   | --  | IGR             | SNP | 0.233 | 33 | 10 |
| --         | chrX | 102205344 | C   | T     | --   | --  | IGR             | SNP | 0.387 | 19 | 12 |
| --         | chrX | 102295353 | G   | T     | --   | --  | IGR             | SNP | 0.222 | 14 | 4  |
| --         | chrX | 102388481 | A   | G     | --   | --  | IGR             | SNP | 0.136 | 19 | 3  |
| --         | chrX | 102388532 | G   | A     | --   | --  | IGR             | SNP | 0.120 | 22 | 3  |
| --         | chrX | 102610368 | G   | A     | --   | --  | IGR             | SNP | 0.342 | 25 | 13 |
| --         | chrX | 102730051 | C   | G     | --   | --  | IGR             | SNP | 0.273 | 24 | 9  |
| --         | chrX | 102833196 | T   | G     | --   | --  | IGR             | SNP | 0.571 | 15 | 20 |
| --         | chrX | 102897416 | C   | T     | --   | --  | IGR             | SNP | 0.224 | 38 | 11 |
| MORF4L2    | chrX | 102932144 | -   | TC    | --   | --  | Intron          | INS | 0.143 | 12 | 2  |
| MORF4L2    | chrX | 102941008 | C   | T     | --   | --  | Intron          | SNP | 0.357 | 18 | 10 |
| --         | chrX | 102949619 | G   | C     | --   | --  | IGR             | SNP | 0.559 | 15 | 19 |
| --         | chrX | 103054815 | C   | T     | --   | --  | IGR             | SNP | 0.190 | 34 | 8  |
| --         | chrX | 103127359 | A   | G     | --   | --  | IGR             | SNP | 0.150 | 17 | 3  |
| MIR1256    | chrX | 103275029 | G   | A     | --   | --  | RNA             | SNP | 0.250 | 15 | 5  |
| MCART6     | chrX | 103384199 | C   | G     | --   | --  | Intron          | SNP | 0.289 | 27 | 11 |
| --         | chrX | 103686265 | A   | C     | --   | --  | IGR             | SNP | 0.273 | 24 | 9  |
| --         | chrX | 103767112 | C   | T     | --   | --  | IGR             | SNP | 0.226 | 24 | 7  |
| IL1RAPL2   | chrX | 103827296 | TTC | -     | --   | --  | Intron          | DEL | 0.105 | 17 | 2  |
| IL1RAPL2   | chrX | 103871013 | T   | G     | --   | --  | Intron          | SNP | 0.135 | 32 | 5  |
| IL1RAPL2   | chrX | 103977456 | C   | G     | --   | --  | Intron          | SNP | 0.424 | 19 | 14 |
| IL1RAPL2   | chrX | 104174081 | C   | G     | --   | --  | Intron          | SNP | 0.370 | 29 | 17 |
| IL1RAPL2   | chrX | 104277372 | A   | G     | --   | --  | Intron          | SNP | 0.400 | 6  | 4  |
| IL1RAPL2   | chrX | 104830385 | C   | A     | --   | --  | Intron          | SNP | 0.696 | 14 | 32 |
| IL1RAPL2   | chrX | 104834673 | AC  | -     | --   | --  | Intron          | DEL | 0.226 | 24 | 7  |
| IL1RAPL2   | chrX | 104890192 | C   | G     | --   | --  | Intron          | SNP | 0.283 | 43 | 17 |
| --         | chrX | 105273503 | C   | A     | --   | --  | IGR             | SNP | 0.532 | 22 | 25 |
| --         | chrX | 105331463 | C   | G     | --   | --  | IGR             | SNP | 0.527 | 26 | 29 |
| --         | chrX | 105355060 | G   | C     | --   | --  | IGR             | SNP | 0.257 | 26 | 9  |
| MUM1L1     | chrX | 105427399 | C   | A     | --   | --  | Intron          | SNP | 0.189 | 30 | 7  |
| --         | chrX | 105469970 | TCA | -     | --   | --  | IGR             | DEL | 0.161 | 26 | 5  |
| --         | chrX | 105819208 | -   | CG    | --   | --  | IGR             | INS | 0.150 | 17 | 3  |
| RNF128     | chrX | 105939993 | T   | G     | --   | --  | Intron          | SNP | 0.333 | 32 | 16 |
| RNF128     | chrX | 105960301 | C   | T     | --   | --  | Intron          | SNP | 0.136 | 19 | 3  |
| TBC1D8B    | chrX | 106105766 | A   | C     | --   | --  | Intron          | SNP | 0.265 | 36 | 13 |
| --         | chrX | 106302611 | G   | T     | --   | --  | IGR             | SNP | 0.143 | 18 | 3  |
| RBM41      | chrX | 106308219 | T   | A     | --   | --  | 3'UTR           | SNP | 0.426 | 27 | 20 |
| CXorf41    | chrX | 106472386 | G   | T     | --   | --  | Intron          | SNP | 0.286 | 10 | 4  |
| --         | chrX | 106617235 | G   | A     | --   | --  | IGR             | SNP | 0.467 | 8  | 7  |
| --         | chrX | 106647985 | T   | G     | --   | --  | IGR             | SNP | 0.130 | 20 | 3  |



|         |      |           |     |     |             |             |                 |     |       |    |    |
|---------|------|-----------|-----|-----|-------------|-------------|-----------------|-----|-------|----|----|
| --      | chrX | 106719933 | A   | T   | --          | --          | IGR             | SNP | 0.173 | 43 | 9  |
| --      | chrX | 106804354 | G   | A   | --          | --          | IGR             | SNP | 0.163 | 36 | 7  |
| --      | chrX | 106820421 | T   | A   | --          | --          | IGR             | SNP | 0.190 | 17 | 4  |
| --      | chrX | 106820423 | C   | A   | --          | --          | IGR             | SNP | 0.143 | 18 | 3  |
| PRPS1   | chrX | 106872069 | G   | C   | --          | --          | Intron          | SNP | 0.209 | 34 | 9  |
| TSC22D3 | chrX | 107007482 | C   | T   | --          | --          | Intron          | SNP | 0.143 | 42 | 7  |
| MID2    | chrX | 107085542 | C   | T   | --          | --          | Intron          | SNP | 0.528 | 17 | 19 |
| --      | chrX | 107233043 | TC  | -   | --          | --          | IGR             | DEL | 0.133 | 13 | 2  |
| ATG4A   | chrX | 107353451 | T   | A   | --          | --          | Intron          | SNP | 0.250 | 9  | 3  |
| ATG4A   | chrX | 107380701 | G   | A   | --          | --          | Intron          | SNP | 0.394 | 20 | 13 |
| ATG4A   | chrX | 107396292 | G   | T   | G915T,G1101 | K305N,K367N | Missense_mutati | SNP | 0.317 | 28 | 13 |
| COL4A5  | chrX | 107754683 | G   | C   | --          | --          | Intron          | SNP | 0.510 | 24 | 25 |
| COL4A5  | chrX | 107760889 | G   | A   | --          | --          | Intron          | SNP | 0.237 | 29 | 9  |
| --      | chrX | 108137992 | C   | G   | --          | --          | IGR             | SNP | 0.394 | 40 | 26 |
| --      | chrX | 108183227 | A   | T   | --          | --          | IGR             | SNP | 0.120 | 22 | 3  |
| --      | chrX | 108324139 | C   | G   | --          | --          | IGR             | SNP | 0.143 | 30 | 5  |
| GUCY2F  | chrX | 108620094 | C   | T   | --          | --          | Intron          | SNP | 0.200 | 24 | 6  |
| --      | chrX | 108777750 | A   | T   | --          | --          | IGR             | SNP | 0.455 | 12 | 10 |
| ACSL4   | chrX | 108936747 | AC  | -   | --          | --          | Intron          | DEL | 0.139 | 31 | 5  |
| --      | chrX | 109080850 | C   | A   | --          | --          | IGR             | SNP | 0.250 | 12 | 4  |
| --      | chrX | 109112383 | C   | T   | --          | --          | IGR             | SNP | 0.429 | 4  | 3  |
| --      | chrX | 109112669 | C   | A   | --          | --          | IGR             | SNP | 0.217 | 18 | 5  |
| --      | chrX | 109187691 | G   | C   | --          | --          | IGR             | SNP | 0.292 | 34 | 14 |
| TMEM164 | chrX | 109385254 | C   | G   | --          | --          | Intron          | SNP | 0.204 | 43 | 11 |
| TMEM164 | chrX | 109408097 | G   | A   | --          | --          | Intron          | SNP | 0.405 | 25 | 17 |
| AMMECR1 | chrX | 109609303 | G   | T   | --          | --          | Intron          | SNP | 0.591 | 18 | 26 |
| --      | chrX | 109777642 | C   | T   | --          | --          | IGR             | SNP | 0.404 | 31 | 21 |
| --      | chrX | 109802689 | G   | T   | --          | --          | IGR             | SNP | 0.368 | 24 | 14 |
| PAK3    | chrX | 110242903 | T   | A   | --          | --          | Intron          | SNP | 0.278 | 13 | 5  |
| PAK3    | chrX | 110266122 | -   | TTA | --          | --          | Intron          | INS | 0.412 | 10 | 7  |
| PAK3    | chrX | 110321908 | C   | T   | --          | --          | Intron          | SNP | 0.514 | 17 | 18 |
| PAK3    | chrX | 110342837 | G   | A   | --          | --          | Intron          | SNP | 0.472 | 19 | 17 |
| PAK3    | chrX | 110391113 | C   | A   | C425A,C470A | S142X,S157X | Nonsense_mutat  | SNP | 0.235 | 39 | 12 |
| DCX     | chrX | 110606620 | C   | G   | --          | --          | Intron          | SNP | 0.304 | 32 | 14 |
| --      | chrX | 110828290 | G   | T   | --          | --          | IGR             | SNP | 0.121 | 29 | 4  |
| TRPC5   | chrX | 111186025 | C   | A   | --          | --          | Intron          | SNP | 0.326 | 29 | 14 |
| TRPC5   | chrX | 111186026 | A   | T   | --          | --          | Intron          | SNP | 0.333 | 28 | 14 |
| TRPC5   | chrX | 111208541 | A   | G   | --          | --          | Intron          | SNP | 0.136 | 19 | 3  |
| TRPC5   | chrX | 111321911 | A   | C   | --          | --          | Intron          | SNP | 0.257 | 26 | 9  |
| --      | chrX | 111739270 | C   | T   | --          | --          | IGR             | SNP | 0.227 | 34 | 10 |
| --      | chrX | 111741511 | C   | G   | --          | --          | IGR             | SNP | 0.306 | 25 | 11 |
| --      | chrX | 111778904 | C   | T   | --          | --          | IGR             | SNP | 0.135 | 32 | 5  |
| --      | chrX | 111779039 | TTC | -   | --          | --          | IGR             | DEL | 0.250 | 12 | 4  |
| --      | chrX | 111834440 | T   | C   | --          | --          | IGR             | SNP | 0.261 | 17 | 6  |
| --      | chrX | 111834458 | A   | G   | --          | --          | IGR             | SNP | 0.261 | 17 | 6  |
| AMOT    | chrX | 112061958 | AC  | -   | --          | --          | Intron          | DEL | 0.396 | 32 | 21 |
| --      | chrX | 112107273 | G   | A   | --          | --          | IGR             | SNP | 0.160 | 21 | 4  |
| --      | chrX | 112180839 | G   | A   | --          | --          | IGR             | SNP | 0.118 | 30 | 4  |
| --      | chrX | 112200896 | C   | T   | --          | --          | IGR             | SNP | 0.586 | 12 | 17 |
| --      | chrX | 112276784 | G   | T   | --          | --          | IGR             | SNP | 0.234 | 36 | 11 |
| --      | chrX | 112468494 | T   | C   | --          | --          | IGR             | SNP | 0.244 | 31 | 10 |
| --      | chrX | 112651715 | TTC | -   | --          | --          | IGR             | DEL | 0.133 | 26 | 4  |
| --      | chrX | 112995369 | A   | T   | --          | --          | IGR             | SNP | 0.320 | 17 | 8  |
| --      | chrX | 113386666 | G   | C   | --          | --          | IGR             | SNP | 0.538 | 18 | 21 |
| --      | chrX | 113504875 | CAT | -   | --          | --          | IGR             | DEL | 0.200 | 24 | 6  |
| --      | chrX | 113612220 | T   | A   | --          | --          | IGR             | SNP | 0.222 | 14 | 4  |
| --      | chrX | 113620255 | A   | G   | --          | --          | IGR             | SNP | 0.387 | 19 | 12 |
| HTR2C   | chrX | 113958696 | T   | C   | --          | --          | Intron          | SNP | 0.385 | 8  | 5  |
| HTR2C   | chrX | 114000649 | G   | C   | --          | --          | Intron          | SNP | 0.238 | 32 | 10 |
| HTR2C   | chrX | 114070661 | G   | C   | --          | --          | Intron          | SNP | 0.273 | 8  | 3  |
| --      | chrX | 114301880 | T   | A   | --          | --          | IGR             | SNP | 0.528 | 17 | 19 |
| --      | chrX | 114498765 | T   | A   | --          | --          | IGR             | SNP | 0.209 | 34 | 9  |
| LUZP4   | chrX | 114538765 | C   | T   | --          | --          | Intron          | SNP | 0.122 | 43 | 6  |
| --      | chrX | 115159827 | CT  | -   | --          | --          | IGR             | DEL | 0.115 | 23 | 3  |
| --      | chrX | 115665318 | T   | G   | --          | --          | IGR             | SNP | 0.214 | 22 | 6  |
| --      | chrX | 115947207 | T   | G   | --          | --          | IGR             | SNP | 0.160 | 21 | 4  |
| --      | chrX | 116046717 | C   | G   | --          | --          | IGR             | SNP | 0.200 | 24 | 6  |
| --      | chrX | 116139183 | AAG | -   | --          | --          | IGR             | DEL | 0.172 | 24 | 5  |
| --      | chrX | 116219977 | C   | T   | --          | --          | IGR             | SNP | 0.444 | 20 | 16 |
| --      | chrX | 116238118 | CT  | -   | --          | --          | IGR             | DEL | 0.455 | 18 | 15 |
| --      | chrX | 116324700 | C   | A   | --          | --          | IGR             | SNP | 0.294 | 12 | 5  |
| --      | chrX | 116397840 | T   | G   | --          | --          | IGR             | SNP | 0.500 | 5  | 5  |
| --      | chrX | 116399294 | -   | CA  | --          | --          | IGR             | INS | 0.333 | 12 | 6  |
| --      | chrX | 116399305 | C   | T   | --          | --          | IGR             | SNP | 0.278 | 13 | 5  |
| --      | chrX | 116415757 | G   | A   | --          | --          | IGR             | SNP | 0.158 | 16 | 3  |
| --      | chrX | 116415782 | C   | A   | --          | --          | IGR             | SNP | 0.158 | 16 | 3  |
| --      | chrX | 116415975 | G   | A   | --          | --          | IGR             | SNP | 0.231 | 10 | 3  |
| --      | chrX | 116559509 | ATG | -   | --          | --          | IGR             | DEL | 0.111 | 16 | 2  |
| --      | chrX | 116559537 | ATG | -   | --          | --          | IGR             | DEL | 0.111 | 16 | 2  |
| --      | chrX | 116756506 | C   | A   | --          | --          | IGR             | SNP | 0.139 | 31 | 5  |

|         |      |           |       |     |       |       |                 |     |       |    |    |
|---------|------|-----------|-------|-----|-------|-------|-----------------|-----|-------|----|----|
| --      | chrX | 116897814 | G     | C   | --    | --    | IGR             | SNP | 0.227 | 34 | 10 |
| KLHL13  | chrX | 117169188 | C     | T   | --    | --    | Intron          | SNP | 0.333 | 10 | 5  |
| KLHL13  | chrX | 117170535 | T     | C   | --    | --    | Intron          | SNP | 0.217 | 18 | 5  |
| KLHL13  | chrX | 117170559 | A     | G   | --    | --    | Intron          | SNP | 0.143 | 18 | 3  |
| --      | chrX | 117324511 | AAAAG | -   | --    | --    | IGR             | DEL | 0.343 | 23 | 12 |
| DOCK11  | chrX | 117678493 | T     | A   | --    | --    | Intron          | SNP | 0.250 | 27 | 9  |
| DOCK11  | chrX | 117686017 | G     | A   | --    | --    | Intron          | SNP | 0.107 | 25 | 3  |
| DOCK11  | chrX | 117734373 | A     | T   | --    | --    | Intron          | SNP | 0.174 | 19 | 4  |
| ZCCHC12 | chrX | 117959187 | G     | T   | --    | --    | 5'UTR           | SNP | 0.220 | 39 | 11 |
| LONRF3  | chrX | 118112887 | T     | A   | --    | --    | Intron          | SNP | 0.195 | 33 | 8  |
| --      | chrX | 118415794 | G     | T   | --    | --    | IGR             | SNP | 0.250 | 12 | 4  |
| --      | chrX | 118496710 | A     | T   | --    | --    | IGR             | SNP | 0.133 | 26 | 4  |
| --      | chrX | 118591088 | GAA   | -   | --    | --    | IGR             | DEL | 0.160 | 21 | 4  |
| --      | chrX | 118628085 | T     | A   | --    | --    | IGR             | SNP | 0.167 | 15 | 3  |
| NKRF    | chrX | 118730142 | GAACA | -   | --    | --    | Intron          | DEL | 0.340 | 33 | 17 |
| 6-Sep   | chrX | 118814457 | C     | G   | --    | --    | Intron          | SNP | 0.304 | 16 | 7  |
| --      | chrX | 118837371 | G     | A   | --    | --    | IGR             | SNP | 0.583 | 10 | 14 |
| --      | chrX | 118877851 | G     | T   | --    | --    | IGR             | SNP | 0.348 | 30 | 16 |
| --      | chrX | 118951337 | G     | C   | --    | --    | IGR             | SNP | 0.383 | 29 | 18 |
| --      | chrX | 118957541 | G     | T   | --    | --    | IGR             | SNP | 0.267 | 11 | 4  |
| UPF3B   | chrX | 118976570 | C     | T   | --    | --    | Intron          | SNP | 0.107 | 25 | 3  |
| UPF3B   | chrX | 118986966 | G     | A   | --    | --    | 5'UTR           | SNP | 0.607 | 11 | 17 |
| --      | chrX | 119099203 | A     | T   | --    | --    | IGR             | SNP | 0.103 | 26 | 3  |
| --      | chrX | 119276450 | A     | T   | --    | --    | IGR             | SNP | 0.250 | 9  | 3  |
| --      | chrX | 119478673 | A     | T   | --    | --    | IGR             | SNP | 0.209 | 34 | 9  |
| --      | chrX | 119481570 | A     | T   | --    | --    | IGR             | SNP | 0.375 | 10 | 6  |
| --      | chrX | 119543681 | CAT   | -   | --    | --    | IGR             | DEL | 0.111 | 24 | 3  |
| --      | chrX | 119552886 | T     | A   | --    | --    | IGR             | SNP | 0.592 | 20 | 29 |
| LAMP2   | chrX | 119562993 | -     | GTA | --    | --    | 3'UTR           | INS | 0.367 | 19 | 11 |
| MCTS1   | chrX | 119746804 | C     | A   | --    | --    | 3'UTR           | SNP | 0.273 | 8  | 3  |
| --      | chrX | 119790635 | G     | C   | --    | --    | IGR             | SNP | 0.344 | 21 | 11 |
| --      | chrX | 119821942 | C     | G   | --    | --    | IGR             | SNP | 0.130 | 20 | 3  |
| --      | chrX | 119850325 | C     | A   | --    | --    | IGR             | SNP | 0.600 | 12 | 18 |
| --      | chrX | 119867368 | C     | T   | --    | --    | IGR             | SNP | 0.568 | 16 | 21 |
| --      | chrX | 119977457 | G     | T   | --    | --    | IGR             | SNP | 0.655 | 10 | 19 |
| --      | chrX | 120002435 | C     | A   | --    | --    | IGR             | SNP | 0.132 | 33 | 5  |
| --      | chrX | 120155989 | A     | T   | --    | --    | IGR             | SNP | 0.209 | 34 | 9  |
| --      | chrX | 120231910 | TA    | -   | --    | --    | IGR             | DEL | 0.200 | 16 | 4  |
| --      | chrX | 120405284 | G     | A   | --    | --    | IGR             | SNP | 0.235 | 26 | 8  |
| --      | chrX | 120549614 | G     | A   | --    | --    | IGR             | SNP | 0.250 | 36 | 12 |
| --      | chrX | 120592296 | T     | C   | --    | --    | IGR             | SNP | 0.188 | 26 | 6  |
| --      | chrX | 120604099 | C     | T   | --    | --    | IGR             | SNP | 0.419 | 18 | 13 |
| --      | chrX | 120613161 | TTA   | -   | --    | --    | IGR             | DEL | 0.481 | 14 | 13 |
| --      | chrX | 121034626 | G     | A   | --    | --    | IGR             | SNP | 0.276 | 21 | 8  |
| --      | chrX | 121067076 | C     | T   | --    | --    | IGR             | SNP | 0.455 | 24 | 20 |
| --      | chrX | 121229249 | A     | C   | --    | --    | IGR             | SNP | 0.220 | 32 | 9  |
| --      | chrX | 121540655 | G     | A   | --    | --    | IGR             | SNP | 0.238 | 16 | 5  |
| --      | chrX | 121630694 | C     | T   | --    | --    | IGR             | SNP | 0.273 | 8  | 3  |
| --      | chrX | 121675678 | G     | C   | --    | --    | IGR             | SNP | 0.421 | 22 | 16 |
| --      | chrX | 121709299 | C     | A   | --    | --    | IGR             | SNP | 0.744 | 10 | 29 |
| --      | chrX | 121782734 | C     | G   | --    | --    | IGR             | SNP | 0.241 | 41 | 13 |
| --      | chrX | 122051546 | G     | C   | --    | --    | IGR             | SNP | 0.600 | 6  | 9  |
| --      | chrX | 122223757 | C     | A   | --    | --    | IGR             | SNP | 0.375 | 20 | 12 |
| GRIA3   | chrX | 122427067 | A     | G   | --    | --    | Intron          | SNP | 0.389 | 22 | 14 |
| --      | chrX | 122636614 | C     | A   | --    | --    | IGR             | SNP | 0.278 | 26 | 10 |
| --      | chrX | 122672718 | G     | A   | --    | --    | IGR             | SNP | 0.673 | 17 | 35 |
| THOC2   | chrX | 122759239 | G     | A   | --    | --    | Intron          | SNP | 0.400 | 18 | 12 |
| THOC2   | chrX | 122829700 | A     | T   | --    | --    | Intron          | SNP | 0.323 | 21 | 10 |
| --      | chrX | 122930971 | T     | A   | --    | --    | IGR             | SNP | 0.621 | 11 | 18 |
| --      | chrX | 123289600 | A     | G   | --    | --    | IGR             | SNP | 0.345 | 19 | 10 |
| --      | chrX | 123326416 | C     | T   | --    | --    | IGR             | SNP | 0.346 | 17 | 9  |
| --      | chrX | 123367833 | C     | T   | --    | --    | IGR             | SNP | 0.563 | 14 | 18 |
| --      | chrX | 123396965 | A     | G   | --    | --    | IGR             | SNP | 0.541 | 17 | 20 |
| ODZ1    | chrX | 123570590 | T     | C   | --    | --    | Intron          | SNP | 0.231 | 20 | 6  |
| ODZ1    | chrX | 123870819 | G     | T   | C764A | P255Q | Missense_mutati | SNP | 0.543 | 16 | 19 |
| ODZ1    | chrX | 123870820 | G     | T   | C763A | P255T | Missense_mutati | SNP | 0.528 | 17 | 19 |
| ODZ1    | chrX | 123890806 | TGAG  | -   | --    | --    | Intron          | DEL | 0.143 | 12 | 2  |
| ODZ1    | chrX | 123912223 | C     | T   | --    | --    | Intron          | SNP | 0.323 | 21 | 10 |
| ODZ1    | chrX | 124036500 | A     | G   | --    | --    | Intron          | SNP | 0.633 | 11 | 19 |
| --      | chrX | 124356600 | G     | T   | --    | --    | IGR             | SNP | 0.286 | 10 | 4  |
| --      | chrX | 124445761 | T     | C   | --    | --    | IGR             | SNP | 0.344 | 21 | 11 |
| --      | chrX | 124592376 | AAC   | -   | --    | --    | IGR             | DEL | 0.578 | 19 | 26 |
| --      | chrX | 124632508 | A     | G   | --    | --    | IGR             | SNP | 0.245 | 37 | 12 |
| --      | chrX | 124632509 | G     | T   | --    | --    | IGR             | SNP | 0.255 | 35 | 12 |
| --      | chrX | 124661046 | T     | G   | --    | --    | IGR             | SNP | 0.250 | 24 | 8  |
| --      | chrX | 124754231 | C     | T   | --    | --    | IGR             | SNP | 0.387 | 19 | 12 |
| --      | chrX | 124884261 | A     | G   | --    | --    | IGR             | SNP | 0.677 | 10 | 21 |
| --      | chrX | 125088306 | G     | A   | --    | --    | IGR             | SNP | 0.192 | 21 | 5  |
| --      | chrX | 125134356 | A     | G   | --    | --    | IGR             | SNP | 0.286 | 30 | 12 |
| --      | chrX | 125248207 | T     | G   | --    | --    | IGR             | SNP | 0.533 | 14 | 16 |

|                 |      |           |     |     |       |       |         |     |       |    |    |
|-----------------|------|-----------|-----|-----|-------|-------|---------|-----|-------|----|----|
| --              | chrX | 125290292 | C   | G   | --    | --    | IGR     | SNP | 0.242 | 25 | 8  |
| --              | chrX | 125290337 | C   | A   | --    | --    | IGR     | SNP | 0.278 | 26 | 10 |
| --              | chrX | 125290389 | C   | T   | --    | --    | IGR     | SNP | 0.256 | 29 | 10 |
| <i>DCAF12L2</i> | chrX | 125299167 | C   | T   | G741A | P247P | Silent  | SNP | 0.212 | 41 | 11 |
| --              | chrX | 125337984 | G   | T   | --    | --    | IGR     | SNP | 0.435 | 13 | 10 |
| --              | chrX | 125366184 | T   | A   | --    | --    | IGR     | SNP | 0.185 | 22 | 5  |
| --              | chrX | 125366188 | G   | C   | --    | --    | IGR     | SNP | 0.125 | 21 | 3  |
| --              | chrX | 125366195 | T   | G   | --    | --    | IGR     | SNP | 0.182 | 18 | 4  |
| --              | chrX | 125595999 | A   | G   | --    | --    | IGR     | SNP | 0.250 | 9  | 3  |
| --              | chrX | 125662904 | C   | G   | --    | --    | IGR     | SNP | 0.333 | 22 | 11 |
| --              | chrX | 126002165 | T   | C   | --    | --    | IGR     | SNP | 0.542 | 11 | 13 |
| --              | chrX | 126048434 | T   | C   | --    | --    | IGR     | SNP | 0.400 | 3  | 2  |
| --              | chrX | 126048436 | G   | A   | --    | --    | IGR     | SNP | 0.400 | 3  | 2  |
| --              | chrX | 126225596 | G   | T   | --    | --    | IGR     | SNP | 0.375 | 15 | 9  |
| --              | chrX | 126527508 | AT  | -   | --    | --    | IGR     | DEL | 0.125 | 21 | 3  |
| --              | chrX | 126531345 | C   | T   | --    | --    | IGR     | SNP | 0.324 | 23 | 11 |
| --              | chrX | 126587020 | T   | A   | --    | --    | IGR     | SNP | 0.600 | 12 | 18 |
| --              | chrX | 126645238 | T   | C   | --    | --    | IGR     | SNP | 0.400 | 30 | 20 |
| --              | chrX | 126648236 | C   | T   | --    | --    | IGR     | SNP | 0.611 | 7  | 11 |
| --              | chrX | 126656645 | GAT | -   | --    | --    | IGR     | DEL | 0.143 | 18 | 3  |
| --              | chrX | 126732658 | G   | T   | --    | --    | IGR     | SNP | 0.621 | 11 | 18 |
| --              | chrX | 126732659 | A   | C   | --    | --    | IGR     | SNP | 0.621 | 11 | 18 |
| --              | chrX | 127010559 | G   | C   | --    | --    | IGR     | SNP | 0.545 | 10 | 12 |
| --              | chrX | 127149445 | C   | T   | --    | --    | IGR     | SNP | 0.353 | 22 | 12 |
| --              | chrX | 127181941 | A   | T   | --    | --    | IGR     | SNP | 0.458 | 26 | 22 |
| --              | chrX | 127479232 | C   | T   | --    | --    | IGR     | SNP | 0.677 | 10 | 21 |
| --              | chrX | 127532440 | GTA | -   | --    | --    | IGR     | DEL | 0.108 | 33 | 4  |
| --              | chrX | 128020560 | C   | A   | --    | --    | IGR     | SNP | 0.341 | 29 | 15 |
| --              | chrX | 128290920 | -   | AT  | --    | --    | IGR     | INS | 0.118 | 15 | 2  |
| --              | chrX | 128324116 | A   | G   | --    | --    | IGR     | SNP | 0.143 | 24 | 4  |
| --              | chrX | 128324117 | G   | T   | --    | --    | IGR     | SNP | 0.148 | 23 | 4  |
| --              | chrX | 128403065 | G   | T   | --    | --    | IGR     | SNP | 0.500 | 4  | 4  |
| --              | chrX | 128403066 | A   | T   | --    | --    | IGR     | SNP | 0.375 | 5  | 3  |
| --              | chrX | 128489936 | C   | T   | --    | --    | IGR     | SNP | 0.333 | 6  | 3  |
| --              | chrX | 128489955 | A   | G   | --    | --    | IGR     | SNP | 0.231 | 10 | 3  |
| --              | chrX | 128555302 | G   | T   | --    | --    | IGR     | SNP | 0.550 | 9  | 11 |
| <i>SMARCA1</i>  | chrX | 128650753 | G   | T   | --    | --    | Intron  | SNP | 0.311 | 31 | 14 |
| --              | chrX | 128665550 | G   | C   | --    | --    | IGR     | SNP | 0.114 | 39 | 5  |
| --              | chrX | 128729858 | G   | A   | --    | --    | IGR     | SNP | 0.615 | 20 | 32 |
| <i>APLN</i>     | chrX | 128778839 | G   | A   | --    | --    | 3'Flank | SNP | 0.690 | 9  | 20 |
| --              | chrX | 128802534 | T   | G   | --    | --    | IGR     | SNP | 0.310 | 40 | 18 |
| --              | chrX | 129035005 | AG  | -   | --    | --    | IGR     | DEL | 0.242 | 25 | 8  |
| <i>AIFM1</i>    | chrX | 129274924 | C   | G   | --    | --    | Intron  | SNP | 0.350 | 26 | 14 |
| <i>ZNF280C</i>  | chrX | 129401049 | C   | T   | --    | --    | Intron  | SNP | 0.455 | 6  | 5  |
| --              | chrX | 129443380 | G   | T   | --    | --    | IGR     | SNP | 0.200 | 16 | 4  |
| <i>SLC25A14</i> | chrX | 129505423 | T   | A   | --    | --    | Intron  | SNP | 0.175 | 47 | 10 |
| --              | chrX | 129557965 | A   | T   | --    | --    | IGR     | SNP | 0.292 | 17 | 7  |
| --              | chrX | 129598232 | G   | T   | --    | --    | IGR     | SNP | 0.535 | 20 | 23 |
| <i>ENOX2</i>    | chrX | 129896720 | A   | T   | --    | --    | Intron  | SNP | 0.548 | 14 | 17 |
| <i>ENOX2</i>    | chrX | 130016326 | A   | G   | --    | --    | Intron  | SNP | 0.405 | 25 | 17 |
| <i>ARHGAP36</i> | chrX | 130204752 | G   | T   | --    | --    | Intron  | SNP | 0.306 | 25 | 11 |
| --              | chrX | 130248542 | G   | C   | --    | --    | IGR     | SNP | 0.228 | 44 | 13 |
| --              | chrX | 130308658 | G   | C   | --    | --    | IGR     | SNP | 0.275 | 29 | 11 |
| --              | chrX | 130365967 | A   | G   | --    | --    | IGR     | SNP | 0.391 | 28 | 18 |
| --              | chrX | 130515871 | A   | G   | --    | --    | IGR     | SNP | 0.571 | 6  | 8  |
| --              | chrX | 130515884 | A   | G   | --    | --    | IGR     | SNP | 0.615 | 5  | 8  |
| --              | chrX | 130517861 | -   | AG  | --    | --    | IGR     | INS | 0.105 | 17 | 2  |
| --              | chrX | 130763210 | C   | G   | --    | --    | IGR     | SNP | 0.380 | 31 | 19 |
| --              | chrX | 130785808 | T   | C   | --    | --    | IGR     | SNP | 0.375 | 15 | 9  |
| --              | chrX | 130973212 | C   | T   | --    | --    | IGR     | SNP | 0.114 | 31 | 4  |
| <i>MST4</i>     | chrX | 131186907 | G   | A   | --    | --    | Intron  | SNP | 0.103 | 26 | 3  |
| <i>FRMD7</i>    | chrX | 131211456 | A   | T   | --    | --    | 3'UTR   | SNP | 0.289 | 27 | 11 |
| --              | chrX | 131272337 | G   | A   | --    | --    | IGR     | SNP | 0.333 | 6  | 3  |
| --              | chrX | 131272591 | T   | C   | --    | --    | IGR     | SNP | 0.375 | 5  | 3  |
| --              | chrX | 131298188 | A   | T   | --    | --    | IGR     | SNP | 0.189 | 30 | 7  |
| <i>HS6ST2</i>   | chrX | 131896683 | C   | G   | --    | --    | Intron  | SNP | 0.333 | 26 | 13 |
| <i>HS6ST2</i>   | chrX | 132057114 | T   | A   | --    | --    | Intron  | SNP | 0.267 | 11 | 4  |
| <i>GPC4</i>     | chrX | 132542502 | C   | A   | --    | --    | Intron  | SNP | 0.333 | 24 | 12 |
| <i>GPC3</i>     | chrX | 132669682 | G   | A   | --    | --    | 3'Flank | SNP | 0.513 | 19 | 20 |
| <i>GPC3</i>     | chrX | 132876873 | G   | C   | --    | --    | Intron  | SNP | 0.412 | 20 | 14 |
| <i>GPC3</i>     | chrX | 132889762 | G   | A   | --    | --    | Intron  | SNP | 0.308 | 27 | 12 |
| --              | chrX | 133188578 | G   | C   | --    | --    | IGR     | SNP | 0.500 | 17 | 17 |
| --              | chrX | 133265980 | C   | T   | --    | --    | IGR     | SNP | 0.278 | 26 | 10 |
| --              | chrX | 133341939 | G   | A   | --    | --    | IGR     | SNP | 0.576 | 14 | 19 |
| --              | chrX | 133457777 | C   | A   | --    | --    | IGR     | SNP | 0.596 | 19 | 28 |
| <i>PLAC1</i>    | chrX | 133758955 | G   | A   | --    | --    | Intron  | SNP | 0.455 | 24 | 20 |
| <i>PLAC1</i>    | chrX | 133783313 | G   | A   | --    | --    | Intron  | SNP | 0.200 | 16 | 4  |
| --              | chrX | 133827708 | -   | TGA | --    | --    | IGR     | INS | 0.140 | 37 | 6  |
| --              | chrX | 133831049 | C   | T   | --    | --    | IGR     | SNP | 0.500 | 11 | 11 |
| --              | chrX | 134103223 | T   | C   | --    | --    | IGR     | SNP | 0.523 | 21 | 23 |

|             |      |           |       |   |    |    |         |     |       |    |    |
|-------------|------|-----------|-------|---|----|----|---------|-----|-------|----|----|
| --          | chrX | 134243950 | CAT   | - | -- | -- | IGR     | DEL | 0.115 | 23 | 3  |
| --          | chrX | 134250997 | G     | A | -- | -- | IGR     | SNP | 0.583 | 5  | 7  |
| --          | chrX | 134562298 | C     | T | -- | -- | IGR     | SNP | 0.297 | 26 | 11 |
| --          | chrX | 134906167 | C     | T | -- | -- | IGR     | SNP | 0.267 | 22 | 8  |
| FHL1        | chrX | 135271544 | G     | A | -- | -- | Intron  | SNP | 0.136 | 38 | 6  |
| FHL1        | chrX | 135274666 | T     | C | -- | -- | Intron  | SNP | 0.276 | 21 | 8  |
| FHL1        | chrX | 135274667 | C     | A | -- | -- | Intron  | SNP | 0.276 | 21 | 8  |
| HTATSF1     | chrX | 135581164 | T     | A | -- | -- | Intron  | SNP | 0.250 | 33 | 11 |
| --          | chrX | 135611509 | G     | A | -- | -- | IGR     | SNP | 0.176 | 28 | 6  |
| --          | chrX | 135673441 | G     | A | -- | -- | IGR     | SNP | 0.586 | 12 | 17 |
| --          | chrX | 135937837 | T     | A | -- | -- | IGR     | SNP | 0.133 | 39 | 6  |
| --          | chrX | 136007112 | T     | A | -- | -- | IGR     | SNP | 0.231 | 10 | 3  |
| --          | chrX | 136007857 | A     | G | -- | -- | IGR     | SNP | 0.478 | 12 | 11 |
| --          | chrX | 136063763 | G     | T | -- | -- | IGR     | SNP | 0.652 | 8  | 15 |
| --          | chrX | 136140948 | G     | T | -- | -- | IGR     | SNP | 0.222 | 35 | 10 |
| --          | chrX | 136601070 | A     | G | -- | -- | IGR     | SNP | 0.548 | 19 | 23 |
| --          | chrX | 137129718 | A     | G | -- | -- | IGR     | SNP | 0.250 | 45 | 15 |
| --          | chrX | 137146370 | A     | T | -- | -- | IGR     | SNP | 0.500 | 4  | 4  |
| --          | chrX | 137261361 | A     | G | -- | -- | IGR     | SNP | 0.400 | 18 | 12 |
| --          | chrX | 137304298 | C     | G | -- | -- | IGR     | SNP | 0.121 | 29 | 4  |
| --          | chrX | 137338630 | T     | G | -- | -- | IGR     | SNP | 0.294 | 24 | 10 |
| --          | chrX | 137378580 | C     | G | -- | -- | IGR     | SNP | 0.138 | 25 | 4  |
| --          | chrX | 137388576 | T     | A | -- | -- | IGR     | SNP | 0.184 | 31 | 7  |
| --          | chrX | 137428152 | TACTC | - | -- | -- | IGR     | DEL | 0.333 | 28 | 14 |
| --          | chrX | 137503298 | T     | G | -- | -- | IGR     | SNP | 0.593 | 11 | 16 |
| --          | chrX | 137628437 | T     | C | -- | -- | IGR     | SNP | 0.571 | 9  | 12 |
| FGF13       | chrX | 137829991 | G     | T | -- | -- | Intron  | SNP | 0.214 | 33 | 9  |
| FGF13       | chrX | 138048522 | G     | T | -- | -- | Intron  | SNP | 0.108 | 33 | 4  |
| FGF13       | chrX | 138081602 | T     | C | -- | -- | Intron  | SNP | 0.429 | 12 | 9  |
| FGF13       | chrX | 138284703 | C     | T | -- | -- | Intron  | SNP | 0.324 | 23 | 11 |
| --          | chrX | 138298947 | G     | C | -- | -- | IGR     | SNP | 0.282 | 28 | 11 |
| --          | chrX | 138306358 | G     | C | -- | -- | IGR     | SNP | 0.320 | 17 | 8  |
| --          | chrX | 138369794 | T     | C | -- | -- | IGR     | SNP | 0.281 | 23 | 9  |
| --          | chrX | 138660994 | T     | G | -- | -- | IGR     | SNP | 0.233 | 23 | 7  |
| MCF2        | chrX | 138685364 | A     | G | -- | -- | Intron  | SNP | 0.233 | 33 | 10 |
| --          | chrX | 139004832 | C     | G | -- | -- | IGR     | SNP | 0.532 | 29 | 33 |
| --          | chrX | 139157715 | T     | A | -- | -- | IGR     | SNP | 0.455 | 6  | 5  |
| --          | chrX | 139220929 | T     | A | -- | -- | IGR     | SNP | 0.114 | 70 | 9  |
| --          | chrX | 139238066 | T     | C | -- | -- | IGR     | SNP | 0.448 | 16 | 13 |
| --          | chrX | 139418498 | A     | G | -- | -- | IGR     | SNP | 0.172 | 24 | 5  |
| --          | chrX | 139423644 | T     | A | -- | -- | IGR     | SNP | 0.302 | 30 | 13 |
| --          | chrX | 139426597 | C     | G | -- | -- | IGR     | SNP | 0.300 | 14 | 6  |
| --          | chrX | 139571197 | TAGA  | - | -- | -- | IGR     | DEL | 0.111 | 16 | 2  |
| --          | chrX | 139597304 | TTTA  | - | -- | -- | IGR     | DEL | 0.136 | 19 | 3  |
| RP1-177G6.2 | chrX | 139797108 | A     | G | -- | -- | 3'Flank | SNP | 0.109 | 41 | 5  |
| --          | chrX | 139801685 | T     | C | -- | -- | IGR     | SNP | 0.296 | 19 | 8  |
| --          | chrX | 139805214 | A     | G | -- | -- | IGR     | SNP | 0.206 | 27 | 7  |
| --          | chrX | 139978957 | G     | T | -- | -- | IGR     | SNP | 0.220 | 32 | 9  |
| --          | chrX | 140159595 | A     | G | -- | -- | IGR     | SNP | 0.194 | 25 | 6  |
| --          | chrX | 140388477 | G     | T | -- | -- | IGR     | SNP | 0.571 | 12 | 16 |
| SPANXA2-OT  | chrX | 140687847 | G     | A | -- | -- | RNA     | SNP | 0.128 | 34 | 5  |
| SPANXA2-OT  | chrX | 140718727 | C     | A | -- | -- | RNA     | SNP | 0.286 | 20 | 8  |
| --          | chrX | 140767721 | AG    | - | -- | -- | IGR     | DEL | 0.111 | 16 | 2  |
| --          | chrX | 140908880 | G     | C | -- | -- | IGR     | SNP | 0.690 | 9  | 20 |
| MAGEC3      | chrX | 140964144 | T     | A | -- | -- | Intron  | SNP | 0.300 | 28 | 12 |
| --          | chrX | 141040059 | C     | T | -- | -- | IGR     | SNP | 0.604 | 19 | 29 |
| --          | chrX | 141384503 | A     | C | -- | -- | IGR     | SNP | 0.313 | 22 | 10 |
| --          | chrX | 141445449 | G     | T | -- | -- | IGR     | SNP | 0.121 | 29 | 4  |
| --          | chrX | 141488418 | C     | A | -- | -- | IGR     | SNP | 0.316 | 13 | 6  |
| --          | chrX | 141491243 | C     | G | -- | -- | IGR     | SNP | 0.313 | 22 | 10 |
| --          | chrX | 141516311 | T     | C | -- | -- | IGR     | SNP | 0.130 | 20 | 3  |
| --          | chrX | 141516312 | G     | A | -- | -- | IGR     | SNP | 0.130 | 20 | 3  |
| --          | chrX | 141523589 | C     | A | -- | -- | IGR     | SNP | 0.286 | 25 | 10 |
| --          | chrX | 141562840 | C     | T | -- | -- | IGR     | SNP | 0.323 | 21 | 10 |
| --          | chrX | 141579331 | C     | T | -- | -- | IGR     | SNP | 0.341 | 27 | 14 |
| --          | chrX | 141615570 | G     | T | -- | -- | IGR     | SNP | 0.167 | 30 | 6  |
| --          | chrX | 141673583 | T     | C | -- | -- | IGR     | SNP | 0.333 | 8  | 4  |
| --          | chrX | 141673663 | C     | T | -- | -- | IGR     | SNP | 0.313 | 11 | 5  |
| --          | chrX | 141703830 | C     | T | -- | -- | IGR     | SNP | 0.528 | 17 | 19 |
| --          | chrX | 141865359 | T     | A | -- | -- | IGR     | SNP | 0.657 | 12 | 23 |
| --          | chrX | 141867870 | A     | C | -- | -- | IGR     | SNP | 0.225 | 31 | 9  |
| --          | chrX | 141999855 | T     | G | -- | -- | IGR     | SNP | 0.310 | 29 | 13 |
| --          | chrX | 142072700 | C     | T | -- | -- | IGR     | SNP | 0.318 | 30 | 14 |
| --          | chrX | 142088488 | G     | T | -- | -- | IGR     | SNP | 0.390 | 25 | 16 |
| --          | chrX | 142125178 | C     | T | -- | -- | IGR     | SNP | 0.679 | 9  | 19 |
| --          | chrX | 142153074 | G     | A | -- | -- | IGR     | SNP | 0.237 | 29 | 9  |
| --          | chrX | 142182282 | G     | T | -- | -- | IGR     | SNP | 0.481 | 14 | 13 |
| --          | chrX | 142215977 | T     | G | -- | -- | IGR     | SNP | 0.333 | 24 | 12 |
| --          | chrX | 142250265 | G     | T | -- | -- | IGR     | SNP | 0.333 | 22 | 11 |
| --          | chrX | 142365264 | T     | G | -- | -- | IGR     | SNP | 0.130 | 20 | 3  |

|      |      |           |     |     |    |    |        |     |       |    |    |
|------|------|-----------|-----|-----|----|----|--------|-----|-------|----|----|
| --   | chrX | 142448008 | G   | C   | -- | -- | IGR    | SNP | 0.643 | 10 | 18 |
| --   | chrX | 142508641 | G   | A   | -- | -- | IGR    | SNP | 0.222 | 28 | 8  |
| --   | chrX | 142515479 | G   | C   | -- | -- | IGR    | SNP | 0.273 | 24 | 9  |
| --   | chrX | 142540021 | A   | T   | -- | -- | IGR    | SNP | 0.703 | 11 | 26 |
| --   | chrX | 142578062 | G   | T   | -- | -- | IGR    | SNP | 0.500 | 17 | 17 |
| --   | chrX | 142624665 | A   | T   | -- | -- | IGR    | SNP | 0.612 | 19 | 30 |
| --   | chrX | 142633740 | C   | G   | -- | -- | IGR    | SNP | 0.633 | 11 | 19 |
| --   | chrX | 142732747 | C   | A   | -- | -- | IGR    | SNP | 0.516 | 15 | 16 |
| --   | chrX | 142755754 | C   | T   | -- | -- | IGR    | SNP | 0.314 | 24 | 11 |
| --   | chrX | 142943511 | G   | C   | -- | -- | IGR    | SNP | 0.615 | 15 | 24 |
| --   | chrX | 143144075 | A   | G   | -- | -- | IGR    | SNP | 0.600 | 12 | 18 |
| --   | chrX | 143588474 | C   | A   | -- | -- | IGR    | SNP | 0.240 | 19 | 6  |
| --   | chrX | 143616935 | G   | T   | -- | -- | IGR    | SNP | 0.152 | 28 | 5  |
| --   | chrX | 143658939 | C   | A   | -- | -- | IGR    | SNP | 0.750 | 7  | 21 |
| --   | chrX | 143690295 | A   | G   | -- | -- | IGR    | SNP | 0.214 | 22 | 6  |
| --   | chrX | 143771733 | G   | A   | -- | -- | IGR    | SNP | 0.370 | 29 | 17 |
| --   | chrX | 144240878 | A   | G   | -- | -- | IGR    | SNP | 0.294 | 24 | 10 |
| --   | chrX | 144244389 | T   | G   | -- | -- | IGR    | SNP | 0.278 | 26 | 10 |
| --   | chrX | 144293666 | C   | T   | -- | -- | IGR    | SNP | 0.150 | 17 | 3  |
| --   | chrX | 144357980 | A   | T   | -- | -- | IGR    | SNP | 0.419 | 25 | 18 |
| --   | chrX | 144398905 | C   | A   | -- | -- | IGR    | SNP | 0.233 | 23 | 7  |
| --   | chrX | 144398906 | T   | G   | -- | -- | IGR    | SNP | 0.241 | 22 | 7  |
| --   | chrX | 144429257 | A   | C   | -- | -- | IGR    | SNP | 0.176 | 28 | 6  |
| --   | chrX | 144444248 | A   | G   | -- | -- | IGR    | SNP | 0.357 | 27 | 15 |
| --   | chrX | 144450670 | A   | C   | -- | -- | IGR    | SNP | 0.300 | 14 | 6  |
| --   | chrX | 144476430 | T   | G   | -- | -- | IGR    | SNP | 0.286 | 35 | 14 |
| --   | chrX | 144500365 | C   | A   | -- | -- | IGR    | SNP | 0.667 | 15 | 30 |
| --   | chrX | 144518898 | T   | C   | -- | -- | IGR    | SNP | 0.182 | 27 | 6  |
| --   | chrX | 144527490 | C   | T   | -- | -- | IGR    | SNP | 0.158 | 16 | 3  |
| --   | chrX | 144691089 | CTT | -   | -- | -- | IGR    | DEL | 0.245 | 37 | 12 |
| --   | chrX | 144802858 | -   | CA  | -- | -- | IGR    | INS | 0.118 | 15 | 2  |
| --   | chrX | 144807317 | C   | T   | -- | -- | IGR    | SNP | 0.533 | 21 | 24 |
| --   | chrX | 144973387 | G   | A   | -- | -- | IGR    | SNP | 0.233 | 23 | 7  |
| --   | chrX | 145036490 | T   | A   | -- | -- | IGR    | SNP | 0.171 | 29 | 6  |
| --   | chrX | 145036491 | G   | T   | -- | -- | IGR    | SNP | 0.171 | 29 | 6  |
| --   | chrX | 145412894 | A   | G   | -- | -- | IGR    | SNP | 0.382 | 21 | 13 |
| --   | chrX | 145450320 | G   | C   | -- | -- | IGR    | SNP | 0.484 | 16 | 15 |
| --   | chrX | 145684335 | A   | G   | -- | -- | IGR    | SNP | 0.205 | 31 | 8  |
| --   | chrX | 145716588 | G   | A   | -- | -- | IGR    | SNP | 0.154 | 22 | 4  |
| --   | chrX | 145781689 | T   | G   | -- | -- | IGR    | SNP | 0.346 | 17 | 9  |
| --   | chrX | 145880369 | G   | A   | -- | -- | IGR    | SNP | 0.540 | 23 | 27 |
| --   | chrX | 145941699 | C   | G   | -- | -- | IGR    | SNP | 0.321 | 19 | 9  |
| --   | chrX | 146043549 | T   | A   | -- | -- | IGR    | SNP | 0.651 | 15 | 28 |
| --   | chrX | 146118470 | G   | T   | -- | -- | IGR    | SNP | 0.429 | 4  | 3  |
| --   | chrX | 146156460 | A   | T   | -- | -- | IGR    | SNP | 0.231 | 30 | 9  |
| --   | chrX | 146175738 | -   | CTG | -- | -- | IGR    | INS | 0.176 | 14 | 3  |
| --   | chrX | 146188790 | G   | A   | -- | -- | IGR    | SNP | 0.576 | 14 | 19 |
| --   | chrX | 146196090 | T   | G   | -- | -- | IGR    | SNP | 0.302 | 30 | 13 |
| --   | chrX | 146298152 | C   | A   | -- | -- | IGR    | SNP | 0.308 | 9  | 4  |
| --   | chrX | 146519901 | C   | A   | -- | -- | IGR    | SNP | 0.185 | 22 | 5  |
| --   | chrX | 146552107 | G   | T   | -- | -- | IGR    | SNP | 0.622 | 14 | 23 |
| --   | chrX | 146622414 | G   | T   | -- | -- | IGR    | SNP | 0.206 | 27 | 7  |
| --   | chrX | 146732411 | A   | T   | -- | -- | IGR    | SNP | 0.405 | 22 | 15 |
| --   | chrX | 146746832 | G   | A   | -- | -- | IGR    | SNP | 0.640 | 9  | 16 |
| --   | chrX | 146754715 | G   | C   | -- | -- | IGR    | SNP | 0.182 | 18 | 4  |
| --   | chrX | 146829905 | C   | A   | -- | -- | IGR    | SNP | 0.250 | 24 | 8  |
| --   | chrX | 146829914 | C   | A   | -- | -- | IGR    | SNP | 0.242 | 25 | 8  |
| --   | chrX | 146940547 | C   | A   | -- | -- | IGR    | SNP | 0.333 | 26 | 13 |
| --   | chrX | 147177898 | T   | A   | -- | -- | IGR    | SNP | 0.407 | 16 | 11 |
| --   | chrX | 147329525 | G   | C   | -- | -- | IGR    | SNP | 0.226 | 24 | 7  |
| --   | chrX | 147426657 | T   | A   | -- | -- | IGR    | SNP | 0.343 | 23 | 12 |
| AFF2 | chrX | 147603313 | T   | C   | -- | -- | Intron | SNP | 0.289 | 27 | 11 |
| AFF2 | chrX | 147727759 | C   | T   | -- | -- | Intron | SNP | 0.250 | 42 | 14 |
| AFF2 | chrX | 147735430 | T   | A   | -- | -- | Intron | SNP | 0.488 | 21 | 20 |
| AFF2 | chrX | 147769624 | C   | A   | -- | -- | Intron | SNP | 0.571 | 24 | 32 |
| AFF2 | chrX | 147842991 | G   | T   | -- | -- | Intron | SNP | 0.160 | 21 | 4  |
| AFF2 | chrX | 147882827 | C   | G   | -- | -- | Intron | SNP | 0.170 | 44 | 9  |
| AFF2 | chrX | 147904549 | A   | T   | -- | -- | Intron | SNP | 0.231 | 30 | 9  |
| --   | chrX | 148132984 | AAT | -   | -- | -- | IGR    | DEL | 0.167 | 20 | 4  |
| --   | chrX | 148187111 | CA  | -   | -- | -- | IGR    | DEL | 0.216 | 40 | 11 |
| --   | chrX | 148196340 | C   | G   | -- | -- | IGR    | SNP | 0.667 | 8  | 16 |
| --   | chrX | 148259696 | TG  | -   | -- | -- | IGR    | DEL | 0.105 | 17 | 2  |
| --   | chrX | 148272657 | T   | C   | -- | -- | IGR    | SNP | 0.543 | 16 | 19 |
| --   | chrX | 148352158 | GA  | -   | -- | -- | IGR    | DEL | 0.293 | 29 | 12 |
| --   | chrX | 148399913 | CT  | -   | -- | -- | IGR    | DEL | 0.200 | 12 | 3  |
| --   | chrX | 148473004 | G   | C   | -- | -- | IGR    | SNP | 0.179 | 23 | 5  |
| --   | chrX | 148488499 | A   | T   | -- | -- | IGR    | SNP | 0.265 | 25 | 9  |
| --   | chrX | 148500879 | A   | C   | -- | -- | IGR    | SNP | 0.278 | 26 | 10 |
| --   | chrX | 148500885 | AAT | -   | -- | -- | IGR    | DEL | 0.256 | 32 | 11 |
| --   | chrX | 148523630 | C   | G   | -- | -- | IGR    | SNP | 0.324 | 25 | 12 |

|                     |      |           |     |    |       |      |         |     |       |    |    |
|---------------------|------|-----------|-----|----|-------|------|---------|-----|-------|----|----|
| --                  | chrX | 14855469  | A   | T  | --    | --   | IGR     | SNP | 0.219 | 25 | 7  |
| <i>TMEM185A</i>     | chrX | 148687030 | A   | T  | --    | --   | Intron  | SNP | 0.140 | 49 | 8  |
| --                  | chrX | 149094659 | C   | T  | --    | --   | IGR     | SNP | 0.161 | 26 | 5  |
| <i>LOC100272222</i> | chrX | 149115362 | A   | G  | --    | --   | RNA     | SNP | 0.101 | 89 | 10 |
| --                  | chrX | 149271263 | C   | A  | --    | --   | IGR     | SNP | 0.333 | 28 | 14 |
| --                  | chrX | 149360609 | T   | A  | --    | --   | IGR     | SNP | 0.300 | 28 | 12 |
| --                  | chrX | 149412354 | A   | T  | --    | --   | IGR     | SNP | 0.231 | 30 | 9  |
| <i>MAMLD1</i>       | chrX | 149586435 | T   | A  | --    | --   | Intron  | SNP | 0.188 | 13 | 3  |
| <i>MTM1</i>         | chrX | 149783973 | AAC | -  | --    | --   | Intron  | DEL | 0.114 | 31 | 4  |
| <i>MTM1</i>         | chrX | 149838943 | C   | G  | --    | --   | Intron  | SNP | 0.371 | 39 | 23 |
| <i>CD99L2</i>       | chrX | 150033280 | C   | G  | --    | --   | Intron  | SNP | 0.453 | 29 | 24 |
| --                  | chrX | 150076542 | A   | T  | --    | --   | IGR     | SNP | 0.759 | 7  | 22 |
| --                  | chrX | 150162694 | G   | T  | --    | --   | IGR     | SNP | 0.231 | 20 | 6  |
| --                  | chrX | 150197628 | G   | A  | --    | --   | IGR     | SNP | 0.333 | 12 | 6  |
| <i>GPR50</i>        | chrX | 150345599 | G   | A  | --    | --   | Intron  | SNP | 0.176 | 28 | 6  |
| --                  | chrX | 150393339 | C   | A  | --    | --   | IGR     | SNP | 0.273 | 24 | 9  |
| --                  | chrX | 150492478 | C   | T  | --    | --   | IGR     | SNP | 0.207 | 23 | 6  |
| <i>VMA21</i>        | chrX | 150565528 | C   | G  | --    | --   | 5'Flank | SNP | 0.250 | 9  | 3  |
| --                  | chrX | 150604575 | G   | T  | --    | --   | IGR     | SNP | 0.158 | 32 | 6  |
| --                  | chrX | 150719233 | GC  | -  | --    | --   | IGR     | DEL | 0.111 | 16 | 2  |
| <i>PASD1</i>        | chrX | 150744512 | G   | T  | --    | --   | Intron  | SNP | 0.450 | 11 | 9  |
| <i>PASD1</i>        | chrX | 150811096 | G   | A  | --    | --   | Intron  | SNP | 0.613 | 12 | 19 |
| --                  | chrX | 151034996 | T   | G  | --    | --   | IGR     | SNP | 0.625 | 3  | 5  |
| --                  | chrX | 151068855 | G   | A  | --    | --   | IGR     | SNP | 0.182 | 36 | 8  |
| <i>GABRA3</i>       | chrX | 151354951 | G   | T  | --    | --   | Intron  | SNP | 0.500 | 17 | 17 |
| <i>GABRA3</i>       | chrX | 151440944 | G   | C  | --    | --   | Intron  | SNP | 0.293 | 29 | 12 |
| --                  | chrX | 151714714 | G   | C  | --    | --   | IGR     | SNP | 0.571 | 3  | 4  |
| --                  | chrX | 151714898 | A   | G  | --    | --   | IGR     | SNP | 0.190 | 17 | 4  |
| --                  | chrX | 151777620 | T   | C  | --    | --   | IGR     | SNP | 0.125 | 21 | 3  |
| --                  | chrX | 151777641 | A   | G  | --    | --   | IGR     | SNP | 0.150 | 17 | 3  |
| --                  | chrX | 151897891 | T   | G  | --    | --   | IGR     | SNP | 0.500 | 11 | 11 |
| --                  | chrX | 151975769 | T   | A  | --    | --   | IGR     | SNP | 0.429 | 4  | 3  |
| <i>ZFP92</i>        | chrX | 152685756 | C   | A  | C231A | 1771 | Silent  | SNP | 0.565 | 20 | 26 |
| <i>BCAP31</i>       | chrX | 152976318 | T   | C  | --    | --   | Intron  | SNP | 0.122 | 36 | 5  |
| --                  | chrX | 153026886 | G   | A  | --    | --   | IGR     | SNP | 0.439 | 23 | 18 |
| <i>L1CAM</i>        | chrX | 153139837 | T   | C  | --    | --   | Intron  | SNP | 0.184 | 40 | 9  |
| <i>L1CAM</i>        | chrX | 153139843 | AAG | -  | --    | --   | Intron  | DEL | 0.189 | 43 | 10 |
| --                  | chrX | 153263083 | G   | A  | --    | --   | IGR     | SNP | 0.415 | 24 | 17 |
| --                  | chrX | 153264308 | C   | T  | --    | --   | IGR     | SNP | 0.200 | 16 | 4  |
| <i>MECP2</i>        | chrX | 153289707 | G   | A  | --    | --   | 3'UTR   | SNP | 0.500 | 19 | 19 |
| <i>MECP2</i>        | chrX | 153334795 | T   | C  | --    | --   | Intron  | SNP | 0.328 | 39 | 19 |
| <i>FLNA</i>         | chrX | 153578744 | G   | A  | --    | --   | Intron  | SNP | 0.574 | 23 | 31 |
| --                  | chrX | 153682098 | A   | T  | --    | --   | IGR     | SNP | 0.182 | 18 | 4  |
| <i>GAB3</i>         | chrX | 153911692 | C   | A  | --    | --   | Intron  | SNP | 0.271 | 35 | 13 |
| --                  | chrX | 154037850 | T   | A  | --    | --   | IGR     | SNP | 0.269 | 19 | 7  |
| <i>FUNDC2</i>       | chrX | 154266107 | T   | C  | --    | --   | Intron  | SNP | 0.350 | 26 | 14 |
| --                  | chrX | 154390023 | C   | T  | --    | --   | IGR     | SNP | 0.214 | 22 | 6  |
| --                  | chrX | 154652188 | A   | G  | --    | --   | IGR     | SNP | 0.118 | 30 | 4  |
| --                  | chrX | 154655696 | G   | A  | --    | --   | IGR     | SNP | 0.231 | 10 | 3  |
| <i>TMLHE</i>        | chrX | 154719189 | C   | T  | --    | --   | RNA     | SNP | 0.400 | 24 | 16 |
| <i>TMLHE</i>        | chrX | 154757509 | T   | A  | --    | --   | Intron  | SNP | 0.261 | 17 | 6  |
| <i>TMLHE</i>        | chrX | 154799796 | -   | AG | --    | --   | Intron  | INS | 0.133 | 13 | 2  |
| <i>TMLHE</i>        | chrX | 154814778 | G   | T  | --    | --   | Intron  | SNP | 0.457 | 19 | 16 |
| --                  | chrX | 154930277 | C   | T  | --    | --   | IGR     | SNP | 0.364 | 7  | 4  |
| <i>VAMP7</i>        | chrX | 155137026 | A   | G  | --    | --   | Intron  | SNP | 0.100 | 27 | 3  |
| --                  | chrX | 155251351 | C   | T  | --    | --   | IGR     | SNP | 0.375 | 10 | 6  |

Supplementary Table 2: All rearrangements identified in the index case. All somatic structural rearrangements detected from clusters of aberrant paired-end reads from the whole genome sequence of the index case are shown.

| Locus1                    | Locus2                    | Qualified supporting paired reads[a] | Type                                    | Feature1           | Feature2                  | Repeat sequence overlapping breakpoints | Adjacent to known breakpoints [b] | Near sequence gap [c] | Locus1 CNA-associated | Locus2 CNA-associated |
|---------------------------|---------------------------|--------------------------------------|-----------------------------------------|--------------------|---------------------------|-----------------------------------------|-----------------------------------|-----------------------|-----------------------|-----------------------|
| chr1:1216962-1217211      | chr4:147940346-147940595  | 20                                   | Inter-chromosomal, non-reciprocal       | <i>SCNN1D</i>      | Intergenic                | None                                    | No                                | Yes                   | Yes                   | Yes                   |
| chr17:32583793-32584084   | chr17:78770140-78770431   | 3                                    | Divergent                               | <i>CCL2</i>        | <i>RPTOR</i>              | LTR                                     | Yes                               | Yes                   | Yes                   | Yes                   |
| chr21:43284702-43284934   | chr21:44614208-44614440   | 4                                    | Divergent                               | <i>PRDM15</i>      | Intergenic                | LINE                                    | Yes                               | Yes                   | Yes                   | Yes                   |
| chr2:120917459-120917764  | chr11:70250408-70250717   | 6                                    | Inter-chromosomal, non-reciprocal       | <i>EPB41L5</i>     | <i>CTTN</i>               | LINE                                    | No                                | Yes                   | Yes                   | No                    |
| chr5:91021454-91021726    | chr5:107109765-107110037  | 11                                   | Intra-chromosomal, inverted orientation | <i>SHANK2</i>      | <i>SHANK2</i>             | LINE                                    | No                                | Yes                   | Yes                   | No                    |
| chr11:70418865-70419130   | chr11:70423127-70423392   | 118                                  | Intra-chromosomal, inverted orientation | <i>SHANK2</i>      | <i>SHANK2</i>             | LINE                                    | No                                | Yes                   | Yes                   | No                    |
| chr21:44598840-44599113   | chr21:44607095-44607368   | 13                                   | Inter-chromosomal, inverted orientation | <i>C1orf86</i>     | Intergenic                | SINE,LINE                               | No                                | Yes                   | Yes                   | No                    |
| chr1:2138821-2139143      | chr4:105880190-105880512  | 19                                   | Inter-chromosomal, non-reciprocal       | <i>AXND1</i>       | Intergenic                | LINE                                    | No                                | Yes                   | No                    | Yes                   |
| chr1:179493163-179493541  | chr11:68222781-68223159   | 3                                    | Inter-chromosomal, non-reciprocal       | <i>AXND1</i>       | Intergenic                | LINE                                    | No                                | Yes                   | No                    | Yes                   |
| chr4:60173765-60174128    | chr12:79985944-79986307   | 4                                    | Inter-chromosomal, non-reciprocal       | <i>PAWR</i>        | Intergenic                | None                                    | No                                | Yes                   | No                    | Yes                   |
| chr4:189852852-189853131  | chr4:190237442-19023771   | 8                                    | Intra-chromosomal, inverted orientation | <i>PAWR</i>        | Intergenic                | LTR                                     | No                                | Yes                   | No                    | Yes                   |
| chr5:50065709-50066081    | chr5:50067322-50067694    | 3                                    | Intra-chromosomal, inverted orientation | <i>PARP8</i>       | <i>PARP8</i>              | LINE                                    | No                                | Yes                   | No                    | Yes                   |
| chr21:32567204-32567459   | chr21:43927405-43927660   | 20                                   | Intra-chromosomal, inverted orientation | <i>TIAM1</i>       | <i>SLC37A1</i>            | LTR                                     | No                                | Yes                   | No                    | Yes                   |
| chr21:43934329-43934567   | chr21:446214149-44621387  | 14                                   | Divergent                               | <i>SLC37A1</i>     | Intergenic                | None                                    | Yes                               | Yes                   | No                    | Yes                   |
| chr1:179493452-179493834  | chr11:68223119-68223501   | 5                                    | Inter-chromosomal, non-reciprocal       | <i>AXND1</i>       | Intergenic                | LINE                                    | No                                | Yes                   | No                    | Yes                   |
| chr1:190108348-190108747  | chr8:144936105-144936504  | 4                                    | Inter-chromosomal, non-reciprocal       | <i>FAM5C</i>       | Intergenic                | SINE,Low_complex                        | No                                | Yes                   | No                    | No                    |
| chr3:95621-96010          | chr3:75319259-75319648    | 6                                    | Divergent                               | <i>FAM5C</i>       | Intergenic                | DNA                                     | No                                | Yes                   | No                    | No                    |
| chr4:60173725-60174019    | chr12:79943676-79943970   | 9                                    | Inter-chromosomal, non-reciprocal       | <i>FAM5C</i>       | Intergenic                | None                                    | No                                | Yes                   | No                    | No                    |
| chr6:57119230-57119614    | chr10:3863430-38634814    | 4                                    | Inter-chromosomal, non-reciprocal       | <i>FAM5C</i>       | Intergenic                | LTR                                     | No                                | Yes                   | No                    | No                    |
| chr8:79930004-79930270    | chr11:69921884-69922150   | 3                                    | Inter-chromosomal, non-reciprocal       | <i>FAM5C</i>       | Intergenic                | LINE                                    | No                                | Yes                   | No                    | No                    |
| chr8:79930004-79930270    | chr11:69921884-69922150   | 3                                    | Inter-chromosomal, non-reciprocal       | <i>FAM5C</i>       | Intergenic                | LINE                                    | No                                | Yes                   | No                    | No                    |
| chr11:134807973-134808366 | chr18:14980944-14981337   | 3                                    | Inter-chromosomal, non-reciprocal       | <i>FAM5C</i>       | Intergenic                | LTR                                     | No                                | Yes                   | No                    | No                    |
| chr12:34279718-34279750   | chr21:15488234-15488473   | 4                                    | Inter-chromosomal, reciprocal           | <i>LPI1</i>        | Intergenic                | LTR                                     | No                                | Yes                   | No                    | No                    |
| chr14:41153905-41154290   | chr18:73289340-73289725   | 3                                    | Inter-chromosomal, non-reciprocal       | <i>LPI1</i>        | Intergenic                | LINE,Low_complex                        | No                                | Yes                   | No                    | No                    |
| chr17:57796253-57796536   | chr17:61612666-61612949   | 20                                   | Divergent                               | <i>VMP1</i>        | <i>KCNH6</i>              | LINE                                    | No                                | Yes                   | No                    | No                    |
| chr21:16941564-16941815   | chrX:51980405-51980435    | 3                                    | Inter-chromosomal, reciprocal           | <i>CXADR</i>       | Intergenic                | Simple_repeat                           | No                                | Yes                   | No                    | No                    |
| chr21:25938029-25938394   | chr21:48080585-48080940   | 3                                    | Divergent                               | <i>CXADR</i>       | Intergenic                | SINE                                    | No                                | Yes                   | No                    | No                    |
| chr21:141419777-141420027 | chr21:42711425-42711675   | 12                                   | Divergent                               | <i>DSCAM1</i>      | <i>FAM9B</i>              | SINE,LINE                               | No                                | Yes                   | No                    | No                    |
| chr21:141496325-41496625  | chr21:43286839-43287139   | 10                                   | Intra-chromosomal, inverted orientation | <i>DSCAM1</i>      | <i>PRDM15</i>             | LTR                                     | No                                | Yes                   | No                    | No                    |
| chr21:42703004-42703284   | chr21:44612264-44612544   | 6                                    | Intra-chromosomal, inverted orientation | <i>FAM3B</i>       | Intergenic                | LINE                                    | No                                | Yes                   | No                    | No                    |
| chrX:144030093-144030427  | chrX:144057372-144057706  | 7                                    | Divergent                               | <i>FAM3B</i>       | Intergenic                | LINE                                    | No                                | Yes                   | No                    | No                    |
| chr1:52520568-52520935    | chr1:109746511-109746878  | 7                                    | Intra-chromosomal, inverted orientation | <i>TXND1C2</i>     | <i>KIAA1324</i>           | SINE                                    | No                                | Yes                   | No                    | Yes                   |
| chr1:218511896-218512143  | chr21:47041849-47042096   | 36                                   | Inter-chromosomal, non-reciprocal       | <i>TXND1C2</i>     | Intergenic                | LINE                                    | No                                | Yes                   | No                    | Yes                   |
| chr2:42331384-42331726    | chr2:50778309-50778651    | 6                                    | Intra-chromosomal, inverted orientation | <i>TXND1C2</i>     | Intergenic                | None                                    | No                                | Yes                   | Yes                   | Yes                   |
| chr3:7889615-7889856      | chr3:11550096-11550337    | 76                                   | Intra-chromosomal, inverted orientation | <i>TXND1C2</i>     | Intergenic                | ATG7                                    | SINE                              | No                    | Yes                   | Yes                   |
| chr3:9995162-9995438      | chr3:77545036-77545312    | 50                                   | Intra-chromosomal, inverted orientation | <i>TXND1C2</i>     | Intergenic                | <i>ROBO2</i>                            | SINE                              | No                    | Yes                   | Yes                   |
| chr4:72850647-72850929    | chr4:105455545-105455827  | 9                                    | Intra-chromosomal, inverted orientation | <i>TXND1C2</i>     | Intergenic                | LINE,SINE                               | No                                | Yes                   | Yes                   | Yes                   |
| chr4:73140612-73140871    | chr4:73159277-73159536    | 36                                   | Intra-chromosomal, inverted orientation | <i>TXND1C2</i>     | Intergenic                | <i>ADAMTS3</i>                          | LINE                              | No                    | Yes                   | Yes                   |
| chr4:146762782-146763047  | chr5:105254024-105254289  | 12                                   | Inter-chromosomal, non-reciprocal       | <i>ZNF827</i>      | Intergenic                | None                                    | No                                | Yes                   | No                    | Yes                   |
| chr4:153003130-153003437  | chr5:162368991-162369127  | 6                                    | Inter-chromosomal, non-reciprocal       | <i>ZNF827</i>      | Intergenic                | None                                    | No                                | Yes                   | Yes                   | Yes                   |
| chr5:162392144-162392480  | chr5:164216254-164216590  | 7                                    | Intra-chromosomal, inverted orientation | <i>ZNF827</i>      | Intergenic                | SINE,LINE                               | No                                | Yes                   | Yes                   | Yes                   |
| chr7:45640847-45641105    | chr7:45644514-45644772    | 56                                   | Divergent                               | <i>ADCY1</i>       | <i>ADCY1</i>              | LINE                                    | No                                | Yes                   | Yes                   | Yes                   |
| chr17:48529008-48529284   | chr17:52676763-52677039   | 14                                   | Divergent                               | <i>ACS2F2</i>      | Intergenic                | SINE,LINE                               | No                                | Yes                   | Yes                   | Yes                   |
| chr17:52373688-52373929   | chr17:52385581-52385822   | 85                                   | Divergent                               | <i>ACS2F2</i>      | Intergenic                | LINE                                    | No                                | Yes                   | Yes                   | Yes                   |
| chr17:52715121-52715418   | chr17:58314079-58314372   | 24                                   | Intra-chromosomal, inverted orientation | <i>USP32</i>       | LINE                      | LINE                                    | No                                | Yes                   | Yes                   | Yes                   |
| chr17:54139139-54139420   | chr17:69374921-69375206   | 15                                   | Intra-chromosomal, inverted orientation | <i>USP32</i>       | LINE                      | LINE                                    | No                                | Yes                   | Yes                   | Yes                   |
| chr21:31057986-31058333   | chr21:37850985-37851332   | 4                                    | Intra-chromosomal, inverted orientation | <i>GRIK1</i>       | <i>CLDN14</i>             | LTR                                     | No                                | Yes                   | Yes                   | Yes                   |
| chr1:214281118-214281371  | chr21:141489165-141489118 | 25                                   | Inter-chromosomal, non-reciprocal       | <i>GRIK1</i>       | <i>DSCAM</i>              | SINE                                    | No                                | Yes                   | No                    | Yes                   |
| chr2:41266371-41266676    | chr2:53085222-53085527    | 5                                    | Divergent                               | <i>GRIK1</i>       | Intergenic                | Simple_repeat,LINE                      | No                                | Yes                   | No                    | No                    |
| chr2:41939324-41939592    | chr12:23724539-23724807   | 13                                   | Inter-chromosomal, non-reciprocal       | <i>GRIK1</i>       | Intergenic                | SOX5                                    | LINE,SINE                         | No                    | Yes                   | No                    |
| chr2:42068615-42068865    | chr12:23727088-23727338   | 8                                    | Inter-chromosomal, non-reciprocal       | <i>GRIK1</i>       | Intergenic                | SOX5                                    | LINE,LINE                         | No                    | Yes                   | No                    |
| chr2:53079424-53079731    | chr12:23519955-23520262   | 12                                   | Inter-chromosomal, non-reciprocal       | <i>GRIK1</i>       | Intergenic                | LINE,DNA,Simple_r                       | No                                | Yes                   | No                    | Yes                   |
| chr2:53279413-53279690    | chr12:7786135-77866412    | 9                                    | Inter-chromosomal, non-reciprocal       | <i>GRIK1</i>       | Intergenic                | LTR,LINE                                | No                                | Yes                   | No                    | Yes                   |
| chr4:113887043-113887396  | chr12:22527691-22528044   | 5                                    | Inter-chromosomal, non-reciprocal       | <i>ANK2</i>        | Intergenic                | Low_complexity                          | No                                | Yes                   | No                    | No                    |
| chr4:117606774-117607028  | chr18:26187379-26187633   | 7                                    | Inter-chromosomal, non-reciprocal       | <i>ANK2</i>        | Intergenic                | SINE,LINE                               | No                                | Yes                   | No                    | Yes                   |
| chr4:186819478-186819739  | chr4:189345360-189345621  | 18                                   | Intra-chromosomal, inverted orientation | <i>SORBS2</i>      | Intergenic                | LINE                                    | No                                | Yes                   | No                    | Yes                   |
| chr4:189237731-189238002  | chr4:18930004-189300275   | 21                                   | Intra-chromosomal, inverted orientation | <i>SORBS2</i>      | Intergenic                | None                                    | No                                | Yes                   | No                    | Yes                   |
| chr5:164248369-164248657  | chr12:23728687-23728975   | 10                                   | Inter-chromosomal, non-reciprocal       | <i>SORBS2</i>      | Intergenic                | SOX5                                    | None                              | No                    | Yes                   | No                    |
| chr11:46688825-46689115   | chr21:41426626-41426916   | 8                                    | Inter-chromosomal, non-reciprocal       | <i>ATG13</i>       | <i>DSCAM</i>              | SINE                                    | No                                | Yes                   | No                    | Yes                   |
| chr12:23080914-23081213   | chr12:23140706-23141005   | 8                                    | Intra-chromosomal, inverted orientation | <i>ATG13</i>       | Intergenic                | LINE,SINE                               | No                                | Yes                   | No                    | Yes                   |
| chr18:25544232-25544503   | chr18:26188858-26189129   | 14                                   | Intra-chromosomal, inverted orientation | <i>CDH2</i>        | Intergenic                | LINE                                    | No                                | Yes                   | No                    | Yes                   |
| chr21:16101375-16101751   | chr21:34156283-34156559   | 5                                    | Divergent                               | <i>CDH2</i>        | <i>C21orf49, C21orf88</i> | DNA,SINE                                | No                                | Yes                   | No                    | Yes                   |
| chr1:214279807-214280088  | chr21:40978326-40978607   | 12                                   | Inter-chromosomal, non-reciprocal       | <i>CDH2</i>        | Intergenic                | LINE,SINE                               | No                                | Yes                   | No                    | Yes                   |
| chr1:214281434-214281686  | chr21:38411557-38411809   | 11                                   | Inter-chromosomal, non-reciprocal       | <i>CDH2</i>        | Intergenic                | SINE                                    | No                                | Yes                   | No                    | Yes                   |
| chr2:41124363-41124666    | chr12:23575655-23575958   | 13                                   | Inter-chromosomal, non-reciprocal       | <i>CDH2</i>        | Intergenic                | SINE,LINE,DNA,LT                        | No                                | Yes                   | No                    | Yes                   |
| chr2:41124473-41124801    | chr5:164035190-164035518  | 10                                   | Inter-chromosomal, non-reciprocal       | <i>CDH2</i>        | Intergenic                | LINE                                    | No                                | Yes                   | No                    | Yes                   |
| chr2:53085188-53085508    | chr12:23129407-23129727   | 7                                    | Inter-chromosomal, non-reciprocal       | <i>CDH2</i>        | Intergenic                | Simple_repeat,LINE                      | No                                | Yes                   | No                    | Yes                   |
| chr2:53255150-53255402    | chr12:23881742-23881994   | 11                                   | Inter-chromosomal, non-reciprocal       | <i>CDH2</i>        | Intergenic                | SOX5                                    | LINE                              | No                    | Yes                   | No                    |
| chr4:103125473-103125746  | chr4:189021196-189021469  | 25                                   | Intra-chromosomal, inverted orientation | <i>CDH2</i>        | Intergenic                | <i>TRIM2L</i>                           | DNA,LINE,SINE                     | No                    | Yes                   | No                    |
| chr4:187030435-187030706  | chr4:189194836-189195107  | 19                                   | Intra-chromosomal, inverted orientation | <i>CDH2</i>        | Intergenic                | LINE                                    | No                                | Yes                   | No                    | Yes                   |
| chr4:188848398-188848791  | chr11:64318109-64318302   | 5                                    | Inter-chromosomal, non-reciprocal       | <i>CDH2</i>        | Intergenic                | SINE,LINE                               | No                                | Yes                   | No                    | Yes                   |
| chr5:42487967-42488225    | chr17:2998079-29980833    | 9                                    | Inter-chromosomal, non-reciprocal       | <i>GHR</i>         | Intergenic                | LINE                                    | No                                | Yes                   | No                    | Yes                   |
| chr7:29235262-29235519    | chr14:28485133-28485490   | 5                                    | Inter-chromosomal, non-reciprocal       | <i>CHN2</i>        | Intergenic                | Simple_repeat                           | No                                | Yes                   | No                    | Yes                   |
| chr11:64331411-64331641   | chr16:48827579-48827809   | 25                                   | Inter-chromosomal, non-reciprocal       | <i>CHN2</i>        | Intergenic                | Simple_repeat                           | No                                | Yes                   | No                    | Yes                   |
| chr12:23141470-23141818   | chr12:27867094-27867422   | 14                                   | Divergent                               | <i>SLC22A11</i>    | Intergenic                | SINE                                    | No                                | Yes                   | No                    | Yes                   |
| chr15:42254236-42254535   | chr15:42262924-42262926   | 14                                   | Divergent                               | <i>MRPS35</i>      | <i>MRPS35</i>             | LINE,SINE                               | No                                | Yes                   | No                    | Yes                   |
| chr17:61219083-61219339   | chr17:63718108-63718364   | 14                                   | Intra-chromosomal, inverted orientation | <i>EHD4</i>        | <i>PLAGL3</i>             | SINE                                    | No                                | Yes                   | No                    | Yes                   |
| chr21:36775406-36775687   | chr21:38276553-38276834   | 14                                   | Divergent                               | <i>EHD4</i>        | Intergenic                | HLC3                                    | LTR                               | No                    | Yes                   | No                    |
| chr1:155326013-155326413  | chr10:55975478-55975879   | 3                                    | Inter-chromosomal, non-reciprocal       | <i>MIR584W,TAI</i> | <i>CEP112</i>             | SINE                                    | No                                | Yes                   | No                    | Yes                   |
| chr1:178723000-178723407  | chr7:152107175-152107582  | 3                                    | Inter-chromosomal, non-reciprocal       | <i>ASH1L3</i>      | <i>PCDH15</i>             | SINE,DNA,LINE                           | Yes                               | Yes                   | No                    | No                    |
| chr1:214281360-214281653  | chr21:40941434-40941722   | 14                                   | Inter-chromosomal, non-reciprocal       | <i>RALGAP2</i>     | <i>MIL3</i>               | SINE,LTR                                | Yes                               | Yes                   | No                    | No                    |
| chr2:51832651-51832889    | chr12:23734073-23734311   | 3                                    | Inter-chromosomal, non-reciprocal       | <i>RALGAP2</i>     | Intergenic                | SINE,LINE                               | No                                | Yes                   | No                    | No                    |
| chr2:103258187-103258583  | chr4:126385707-126386103  | 3                                    | Inter-chromosomal, non-reciprocal       | <i>SOX5</i>        | LINE                      | LINE                                    | No                                | Yes                   | No                    | No                    |
| chr3:78659274-78659625    | chr4:91593792-91594143    | 3                                    | Inter-chromosomal, non-reciprocal       | <i>SLC3A2</i>      | <i>FAT4</i>               | LINE,Simple_repea                       | No                                | Yes                   | No                    | No                    |
| chr3:78659412-78659685    | chr4:91594698-91594971    | 13                                   | Inter-chromosomal, non-reciprocal       | <i>ROBO1</i>       | <i>FAM190A</i>            | DNA                                     | No                                | Yes                   | No                    | No                    |
| chr3:115627576-115627850  | chr7:53649723-53649997    | 7                                    | Inter-chromosomal, non-reciprocal       | <i>ROBO1</i>       | <i>FAM190A</i>            | DNA,LTR                                 | No                                | Yes                   | No                    | No                    |
| chr4:14402537-14402946    | chr22:29066882-29066749   | 5                                    | Inter-chromosomal, reciprocal           | <i>LSAMP</i>       | Intergenic                | LINE                                    | No                                | Yes                   | No                    | No                    |
| chr4:63074431-63074724    | chr6:16156136-1615        |                                      |                                         |                    |                           |                                         |                                   |                       |                       |                       |

**Supplementary Table 3: The panel of genes targeted by IMPACT.** Genes are shown as is there accession number, name, and genomic locus.

| <b>Gene Symbol</b> | <b>RefSeq ID</b> | <b>Gene Name</b>                                                            | <b>Chromosome</b> |
|--------------------|------------------|-----------------------------------------------------------------------------|-------------------|
| <i>ABL1</i>        | NM_007313        | c-abl oncogene 1, non-receptor tyrosine kinase                              | 9q34.1            |
| <i>ABL2</i>        | NM_005158        | v-abl Abelson murine leukemia viral oncogene homolog 2                      | 1q25.2            |
| <i>AKT1</i>        | NM_005163        | v-akt murine thymoma viral oncogene homolog 1                               | 14q32.32-q32.33   |
| <i>AKT2</i>        | NM_001626        | v-akt murine thymoma viral oncogene homolog 2                               | 19q13.1-q13.2     |
| <i>AKT3</i>        | NM_181690        | v-akt murine thymoma viral oncogene homolog 3 (protein kinase B, gamma)     | 1q44              |
| <i>ALK</i>         | NM_004304        | anaplastic lymphoma receptor tyrosine kinase                                | 2p23              |
| <i>ALOX12B</i>     |                  | arachidonate 12-lipoxygenase, 12R type                                      | 17p13.1           |
| <i>APC</i>         | NM_000038        | adenomatous polyposis coli                                                  | 5q21-q22          |
| <i>AR</i>          | NM_000044        | androgen receptor                                                           | Xq12              |
| <i>ARAF</i>        |                  | v-raf murine sarcoma 3611 viral oncogene homolog                            | Xp11.3-p11.23     |
| <i>ARHGAP26</i>    | NM_015071        | Rho GTPase activating protein 26                                            | 5q31              |
| <i>ARID1A</i>      | NM_139135        | AT rich interactive domain 1A (SWI-like)                                    | 1p36.1-p35        |
| <i>ARID2</i>       | XM_350875        | AT rich interactive domain 2 (ARID, RFX-like)                               | 12q13.11          |
| <i>ASXL1</i>       | NM_015338        | additional sex combs like 1 (Drosophila)                                    | 20q11             |
| <i>ATM</i>         | NM_000051        | ataxia telangiectasia mutated                                               | 11q22-q23         |
| <i>ATR</i>         | NM_001184        | ataxia telangiectasia and Rad3 related                                      | 3q22-q24          |
| <i>ATRX</i>        | NM_000489        | alpha thalassemia/mental retardation syndrome X-linked                      | Xq21.1            |
| <i>AURKA</i>       | NM_003600        | aurora kinase A                                                             | 20q13             |
| <i>BAP1</i>        |                  | BRCA1 associated protein-1 (ubiquitin carboxy-terminal hydrolase)           | 3p21.31-p21.2     |
| <i>BCL2L1</i>      | NM_138578        | BCL2-like 1                                                                 | 20q11.21          |
| <i>BCL2L11</i>     |                  | BCL2-like 11 (apoptosis facilitator)                                        | 2q13              |
| <i>BCL6</i>        | NM_138931        | B-cell CLL/lymphoma 6                                                       | 3q27              |
| <i>BCOR</i>        | NM_017745        | BCL6 corepressor                                                            | Xp11.4            |
| <i>BIRC2</i>       | NM_001166        | baculoviral IAP repeat-containing 2                                         | 11q22             |
| <i>BRAF</i>        | NM_004333        | v-raf murine sarcoma viral oncogene homolog B1                              | 7q34              |
| <i>BRCA1</i>       |                  | breast cancer 1, early onset                                                | 17q21-q24         |
| <i>BRCA2</i>       | NM_000059        | breast cancer 2, early onset                                                | 13q12-q13         |
| <i>BUB1B</i>       |                  | budding uninhibited by benzimidazoles 1 homolog beta (yeast)                | 15q15             |
| <i>CARD11</i>      | NM_032415        | caspase recruitment domain family, member 11                                | 7p22              |
| <i>CBL</i>         | NM_005188        | Cas-Br-M (murine) ecotropic retroviral transforming sequence                | 11q23.3-qter      |
| <i>CBLB</i>        | NM_170662        | Cas-Br-M (murine) ecotropic retroviral transforming sequence b              | 3q                |
| <i>CBLC</i>        | NM_012116        | Cas-Br-M (murine) ecotropic retroviral transforming sequence c              | 19q13.2           |
| <i>CCND1</i>       | NM_053056        | cyclin D1                                                                   | 11q13             |
| <i>CCNE1</i>       | NM_001238        | cyclin E1                                                                   | 19q12             |
| <i>CD79B</i>       |                  | CD79b molecule, immunoglobulin-associated beta                              | 17q23             |
| <i>CDC42EP2</i>    | NM_006779        | CDC42 effector protein (Rho GTPase binding) 2                               | 11q13             |
| <i>CDC73</i>       | NM_024529        | cell division cycle 73, Paf1/RNA polymerase II complex component, homolog 1 | 1q25              |
| <i>CDH1</i>        | NM_004360        | cadherin 1, type 1, E-cadherin (epithelial)                                 | 16q22.1           |
| <i>CDH11</i>       | NM_033664        | cadherin 11, type 2, OB-cadherin (osteoblast)                               | 16q21             |
| <i>CDK12</i>       | NM_016507        | cyclin-dependent kinase 12                                                  | 17q12             |
| <i>CDK4</i>        | NM_000075        | cyclin-dependent kinase 4                                                   | 12q13             |
| <i>CDK6</i>        |                  | cyclin-dependent kinase 6                                                   | 7q21-q22          |
| <i>CDK8</i>        |                  | cyclin-dependent kinase 8                                                   | 13q12             |
| <i>CDKN1A</i>      | NM_078467        | cyclin-dependent kinase inhibitor 1A (p21, Cip1)                            | 6p21.1            |
| <i>CDKN2A</i>      | NM_000077        | cyclin-dependent kinase inhibitor 2A (melanoma, p16, inhibits CDK4)         | 9p21              |
| <i>CDKN2B</i>      | NM_004936        | cyclin-dependent kinase inhibitor 2B (p15, inhibits CDK4)                   | 9p21              |
| <i>CDKN2C</i>      | NM_001262        | cyclin-dependent kinase inhibitor 2C (p18, inhibits CDK4)                   | 1p32.3            |
| <i>CEBPA</i>       | NM_004364        | CCAAT/enhancer binding protein (C/EBP), alpha                               | 19q13.1           |
| <i>CHEK1</i>       | NM_001274        | CHK1 checkpoint homolog (S. pombe)                                          | 11q24.2           |
| <i>CHEK2</i>       | NM_001005735     | CHK2 checkpoint homolog (S. pombe)                                          | 22q12.1           |
| <i>CIC</i>         |                  | capicua homolog (Drosophila)                                                | 19q13.2           |
| <i>CREBBP</i>      | NM_004380        | CREB binding protein                                                        | 16p13.3           |
| <i>CRKL</i>        | NM_005207        | v-crk sarcoma virus CT10 oncogene homolog (avian)-like                      | 22q11.21          |
| <i>CRLF2</i>       | NM_022148        | cytokine receptor-like factor 2                                             | Xp22.3 and Yp11.3 |
| <i>CSF1R</i>       | NM_005211        | colony stimulating factor 1 receptor                                        | 5q32              |
| <i>CTNNB1</i>      | NM_001098210     | catenin (cadherin-associated protein), beta 1, 88kDa                        | 3p21              |
| <i>CYLD</i>        |                  | cyliindromatosis (turban tumor syndrome)                                    | 16q12-q13         |
| <i>DAXX</i>        |                  | death-domain associated protein                                             | 6p21.3            |
| <i>DDR2</i>        | NM_006182        | discoidin domain receptor tyrosine kinase 2                                 | 1q12-q23          |
| <i>DICER1</i>      |                  | dicer 1, ribonuclease type III                                              | 14q32.2           |
| <i>DIS3</i>        | NM_014953        | DIS3 mitotic control homolog (S. cerevisiae)                                | 13q21.32          |
| <i>DNMT1</i>       | NM_001379        | DNA (cytosine-5-)-methyltransferase 1                                       | 19p13.2           |
| <i>DNMT3A</i>      | NM_022552        | DNA (cytosine-5-)-methyltransferase 3 alpha                                 | 2p23              |
| <i>DNMT3B</i>      | NM_006892        | DNA (cytosine-5-)-methyltransferase 3 beta                                  | 20q11.2           |



|                 |                      |                                                                                                              |               |
|-----------------|----------------------|--------------------------------------------------------------------------------------------------------------|---------------|
| <i>E2F3</i>     |                      | E2F transcription factor 3                                                                                   | 6p22          |
| <i>EGFR</i>     | NM_005228            | epidermal growth factor receptor                                                                             | 7p12          |
| <i>EIF4EBP1</i> | NM_004095            | eukaryotic translation initiation factor 4E binding protein 1                                                | 8p12          |
| <i>EP300</i>    | NM_001429            | E1A binding protein p300                                                                                     | 22q13.2       |
| <i>EPHA10</i>   | NM_173641            | EPH receptor A10                                                                                             | 1p34.3        |
| <i>EPHA2</i>    | NM_004431            | EPH receptor A2                                                                                              | 1p36          |
| <i>EPHA3</i>    | NM_005233            | EPH receptor A3                                                                                              | 3p11.2        |
| <i>EPHA4</i>    |                      | EPH receptor A4                                                                                              | 2q36.3        |
| <i>EPHA5</i>    | NM_004439            | EPH receptor A5                                                                                              | 4q13.1        |
| <i>EPHA6</i>    | NM_001080448         | EPH receptor A6                                                                                              | 3q12.1        |
| <i>EPHA7</i>    |                      | EPH receptor A7                                                                                              | 6q16.3        |
| <i>EPHA8</i>    | NM_020526            | EPH receptor A8                                                                                              | 1p36.12       |
| <i>EPHB1</i>    | NM_004441            | EPH receptor B1                                                                                              | 3q21-q23      |
| <i>EPHB2</i>    | NM_017449            | EPH receptor B2                                                                                              | 1p36.1-p35    |
| <i>EPHB3</i>    | NM_004443            | EPH receptor B3                                                                                              | 3q21-qter     |
| <i>EPHB4</i>    | NM_004444            | EPH receptor B4                                                                                              | 7q22          |
| <i>EPHB6</i>    |                      | EPH receptor B6                                                                                              | 7q33-q35      |
| <i>ERBB2</i>    |                      | v-erb-b2 erythroblastic leukemia viral oncogene homolog 2, neuro/glioblastoma                                | 17q11.2-q12   |
| <i>ERBB3</i>    |                      | v-erb-b2 erythroblastic leukemia viral oncogene homolog 3 (avian)                                            | 12q13         |
| <i>ERBB4</i>    | NM_001042599         | v-erb-a erythroblastic leukemia viral oncogene homolog 4 (avian)                                             | 2q33.3-q34    |
| <i>ERG</i>      | NM_182918            | v-ets erythroblastosis virus E26 oncogene homolog (avian)                                                    | 21q22.3       |
| <i>ESR1</i>     |                      | estrogen receptor 1                                                                                          | 6q24-q27      |
| <i>ETV1</i>     | NM_004956            | ets variant 1                                                                                                | 7p22          |
| <i>ETV6</i>     | NM_001987            | ets variant 6                                                                                                | 12p13         |
| <i>EZH2</i>     |                      | enhancer of zeste homolog 2 (Drosophila)                                                                     | 7q35-q36      |
| <i>FAM123B</i>  | NM_152424            | family with sequence similarity 123B                                                                         | Xq11.1        |
| <i>FAM46C</i>   | NM_017709            | family with sequence similarity 46, member C                                                                 | 1p12          |
| <i>FAS</i>      |                      | Fas (TNF receptor superfamily, member 6)                                                                     | 10q24.1       |
| <i>FAT1</i>     | NM_005245            | FAT tumor suppressor homolog 1 (Drosophila)                                                                  | 4q35.2        |
| <i>FBXO11</i>   | NM_012167, NM_012168 | F-box protein 11                                                                                             | 2p16.3        |
| <i>FBXW7</i>    |                      | F-box and WD repeat domain containing 7                                                                      | 4q31.23       |
| <i>FGFR1</i>    |                      | fibroblast growth factor receptor 1                                                                          | 8p12          |
| <i>FGFR2</i>    | NM_022976, NM_000142 | fibroblast growth factor receptor 2                                                                          | 10q25.3-q26   |
| <i>FGFR3</i>    | NM_000142            | fibroblast growth factor receptor 3                                                                          | 4p16.3        |
| <i>FGFR4</i>    |                      | fibroblast growth factor receptor 4                                                                          | 5q33-qter     |
| <i>FH</i>       | NM_000143            | fumarate hydratase                                                                                           | 1q42.1        |
| <i>FLCN</i>     | NM_144606            | folliculin                                                                                                   | 17p11.2       |
| <i>FLT1</i>     |                      | fms-related tyrosine kinase 1 (vascular endothelial growth factor/vascular endothelial cell-specific kinase) | 13q12         |
| <i>FLT3</i>     |                      | fms-related tyrosine kinase 3                                                                                | 13q12         |
| <i>FLT4</i>     |                      | fms-related tyrosine kinase 4                                                                                | 5q34-q35      |
| <i>FOXL2</i>    |                      | forkhead box L2                                                                                              | 3q23          |
| <i>FUBP1</i>    | NM_003902            | far upstream element (FUSE) binding protein 1                                                                | 1p31.1        |
| <i>GATA1</i>    | NM_002049            | GATA binding protein 1 (globin transcription factor 1)                                                       | Xp11.23       |
| <i>GATA2</i>    | NM_032638            | GATA binding protein 2                                                                                       | 3q21          |
| <i>GATA3</i>    | NM_001002295         | GATA binding protein 3                                                                                       | 10p15         |
| <i>GLI1</i>     | NM_005269            | GLI family zinc finger 1                                                                                     | 12q13.2-q13.3 |
| <i>GLI3</i>     | NM_000168            | GLI family zinc finger 3                                                                                     | 7p13          |
| <i>GNA11</i>    | NM_002067            | guanine nucleotide binding protein (G protein), alpha 11 (Gq class)                                          | 19p13.3       |
| <i>GNAQ</i>     | NM_002072            | guanine nucleotide binding protein (G protein), q polypeptide                                                | 9q21          |
| <i>GNAS</i>     | NM_000516            | GNAS complex locus                                                                                           | 20q13.2-q13.3 |
| <i>GOLPH3</i>   | NM_022130            | golgi phosphoprotein 3 (coat-protein)                                                                        | 5p13.2        |
| <i>GRIN2A</i>   |                      | glutamate receptor, ionotropic, N-methyl D-aspartate 2A                                                      | 16p13.2       |
| <i>GRM3</i>     |                      | glutamate receptor, metabotropic 3                                                                           | 7q21.1-q21.2  |
| <i>GSK3B</i>    |                      | glycogen synthase kinase 3 beta                                                                              | 3q13.3        |
| <i>HDAC2</i>    |                      | histone deacetylase 2                                                                                        | 6q21          |
| <i>HIF1A</i>    | NM_001530            | hypoxia inducible factor 1, alpha subunit (basic helix-loop-helix transcription factor)                      | 14q23.2       |
| <i>HMGA2</i>    | NM_003483            | high mobility group AT-hook 2                                                                                | 12q15         |
| <i>HNF1A</i>    | NM_000545            | HNF1 homeobox A                                                                                              | 12q24.31      |
| <i>HRAS</i>     | NM_176795            | v-Ha-ras Harvey rat sarcoma viral oncogene homolog                                                           | 11p15.5       |
| <i>HSP90AA1</i> | NM_005348            | heat shock protein 90kDa alpha (cytosolic), class A member 1                                                 | 14q32.33      |
| <i>IDH1</i>     |                      | isocitrate dehydrogenase 1 (NADP+), soluble                                                                  | 2q32-qter     |
| <i>IDH2</i>     |                      | isocitrate dehydrogenase 2 (NADP+), mitochondrial                                                            | 15q21-qter    |
| <i>IGF1R</i>    | NM_000875            | insulin-like growth factor 1 receptor                                                                        | 15q26.3       |
| <i>IGFBP7</i>   |                      | insulin-like growth factor binding protein 7                                                                 | 4q12          |
| <i>IKBKE</i>    |                      | inhibitor of kappa light polypeptide gene enhancer in B-cells, kinase epsilon                                | 1q31          |
| <i>IKZF1</i>    | NM_006060            | IKAROS family zinc finger 1 (Ikaros)                                                                         | 7pter-7qter   |
| <i>IL7R</i>     |                      | interleukin 7 receptor                                                                                       | 5p13          |
| <i>INPP4A</i>   | NM_001566            | inositol polyphosphate-4-phosphatase, type I, 107kDa                                                         | 2q11.2        |
| <i>INPP4B</i>   | NM_003866            | inositol polyphosphate-4-phosphatase, type II, 105kDa                                                        | 4q31.1        |

|               |              |                                                                          |                |
|---------------|--------------|--------------------------------------------------------------------------|----------------|
| <i>INSR</i>   |              | insulin receptor                                                         | 19p13.3-p13.2  |
| <i>IRS1</i>   | NM_005544    | insulin receptor substrate 1                                             | 2q36           |
| <i>IRS2</i>   | NM_003749    | insulin receptor substrate 2                                             | 13q34          |
| <i>JAK1</i>   | NM_002227    | Janus kinase 1                                                           | 1p32.3-p31.3   |
| <i>JAK2</i>   |              | Janus kinase 2                                                           | 9p24           |
| <i>JAK3</i>   | NM_000215    | Janus kinase 3                                                           | 19p13-p12      |
| <i>JUN</i>    | NM_002228    | jun proto-oncogene                                                       | 1p32-p31       |
| <i>KCNJ5</i>  | NM_000890    | potassium inwardly-rectifying channel, subfamily J, member 5             | 11q24          |
| <i>KDM5C</i>  | NM_004187    | lysine (K)-specific demethylase 5C                                       | Xp11.22-p11.21 |
| <i>KDM6A</i>  | NM_021140    | lysine (K)-specific demethylase 6A                                       | Xp11.2         |
| <i>KDR</i>    |              | kinase insert domain receptor (a type III receptor tyrosine kinase)      | 4q11-q12       |
| <i>KEAP1</i>  | NM_012289    | kelch-like ECH-associated protein 1                                      | 19p13.2        |
| <i>KIT</i>    |              | v-kit Hardy-Zuckerman 4 feline sarcoma viral oncogene homolog            | 4q11-q12       |
| <i>KLF6</i>   |              | Kruppel-like factor 6                                                    | 10p15          |
| <i>KRAS</i>   | NM_033360    | v-Ki-ras2 Kirsten rat sarcoma viral oncogene homolog                     | 12p12.1        |
| <i>LDHA</i>   | NM_005566    | lactate dehydrogenase A                                                  | 11p15.1        |
| <i>LGR6</i>   | NM_021636    | leucine-rich repeat-containing G protein-coupled receptor 6              | 1q32.1         |
| <i>LMO1</i>   | NM_002315    | LIM domain only 1 (rhombotin 1)                                          | 11p15          |
| <i>MAGI2</i>  | NM_012301    | membrane associated guanylate kinase, WW and PDZ domain containin        | 7q21           |
| <i>MAP2K1</i> |              | mitogen-activated protein kinase kinase 1                                | 15q22.1-q22.33 |
| <i>MAP2K2</i> |              | mitogen-activated protein kinase kinase 2                                | 19p13.3        |
| <i>MAP2K4</i> |              | mitogen-activated protein kinase kinase 4                                | 17p11.2        |
| <i>MAP3K1</i> | XM_042066    | mitogen-activated protein kinase kinase kinase 1                         | 5q11.2         |
| <i>MAP3K8</i> | NM_005204    | mitogen-activated protein kinase kinase kinase 8                         | 10p11.2        |
| <i>MCL1</i>   | NM_021960    | myeloid cell leukemia sequence 1 (BCL2-related)                          | 1q21           |
| <i>MDM2</i>   | NM_006880    | Mdm2 p53 binding protein homolog (mouse)                                 | 12q13-q14      |
| <i>MDM4</i>   | NM_002393    | Mdm4 p53 binding protein homolog (mouse)                                 | 1q32           |
| <i>MED12</i>  | NM_005120    | mediator complex subunit 12                                              | Xq13           |
| <i>MEF2B</i>  | NM_005919    | myocyte enhancer factor 2B                                               | 19p13.11       |
| <i>MEN1</i>   |              | multiple endocrine neoplasia I                                           | 11q13          |
| <i>MET</i>    |              | met proto-oncogene (hepatocyte growth factor receptor)                   | 7q31           |
| <i>MITF</i>   | NM_198159    | microphthalmia-associated transcription factor                           | 3p14.1-p12.3   |
| <i>MLH1</i>   | NM_000249    | mutL homolog 1, colon cancer, nonpolyposis type 2 (E. coli)              | 3p22.3         |
| <i>MLL</i>    | NM_005933    | myeloid/lymphoid or mixed-lineage leukemia (trithorax homolog, Drosop    | 11q23          |
| <i>MLL2</i>   |              | myeloid/lymphoid or mixed-lineage leukemia 2                             | 12q12-q13      |
| <i>MLL3</i>   |              | myeloid/lymphoid or mixed-lineage leukemia 3                             | 7q36           |
| <i>MLST8</i>  | NM_022372    | MTOR associated protein, LST8 homolog (S. cerevisiae)                    | 16p13.3        |
| <i>MPL</i>    | NM_005373    | myeloproliferative leukemia virus oncogene                               | 1p34           |
| <i>MSH2</i>   |              | mutS homolog 2, colon cancer, nonpolyposis type 1 (E. coli)              | 2p21           |
| <i>MSH6</i>   |              | mutS homolog 6 (E. coli)                                                 | 2p16           |
| <i>MTOR</i>   | NM_004958    | mechanistic target of rapamycin (serine/threonine kinase)                | 1p36           |
| <i>MYB</i>    |              | v-myb myeloblastosis viral oncogene homolog (avian)                      | 6q22-q23       |
| <i>MYC</i>    |              | v-myc myelocytomatosis viral oncogene homolog (avian)                    | 8q24           |
| <i>MYCL1</i>  | NM_001033082 | v-myc myelocytomatosis viral oncogene homolog 1, lung carcinoma deri     | 1p34.3         |
| <i>MYCN</i>   | NM_005378    | v-myc myelocytomatosis viral related oncogene, neuroblastoma derived     | 2p24.3         |
| <i>MYD88</i>  | NM_002468    | myeloid differentiation primary response gene (88)                       | 3p22           |
| <i>NCOA2</i>  |              | nuclear receptor coactivator 2                                           | 8q13           |
| <i>NF1</i>    | NM_000267    | neurofibromin 1                                                          | 17q11.2        |
| <i>NF2</i>    | NM_000268    | neurofibromin 2 (merlin)                                                 | 22q12.2        |
| <i>NFE2L2</i> | NM_006164    | nuclear factor (erythroid-derived 2)-like 2                              | 2q31           |
| <i>NFKB1</i>  |              | nuclear factor of kappa light polypeptide gene enhancer in B-cells 1     | 4q24           |
| <i>NFKB2</i>  |              | nuclear factor of kappa light polypeptide gene enhancer in B-cells 2 (p4 | 10q24          |
| <i>NKX2-1</i> | NM_003317    | NK2 homeobox 1                                                           | 14q13.3        |
| <i>NOTCH1</i> | NM_017617    | notch 1                                                                  | 9q34.3         |
| <i>NOTCH2</i> | NM_024408    | notch 2                                                                  | 1p13-p11       |
| <i>NOTCH3</i> | NM_000435    | notch 3                                                                  | 19p13.2-p13.1  |
| <i>NOTCH4</i> |              | notch 4                                                                  | 6p21.3         |
| <i>NPM1</i>   | NM_002520    | nucleophosmin (nucleolar phosphoprotein B23, numatrin)                   | 5q35.1         |
| <i>NRAS</i>   | NM_002524    | neuroblastoma RAS viral (v-ras) oncogene homolog                         | 1p13.2         |
| <i>NTRK1</i>  | NM_002529    | neurotrophic tyrosine kinase, receptor, type 1                           | 1q21-q22       |
| <i>NTRK2</i>  |              | neurotrophic tyrosine kinase, receptor, type 2                           | 9q22.1         |
| <i>NTRK3</i>  |              | neurotrophic tyrosine kinase, receptor, type 3                           | 15q24-q25      |
| <i>PAK7</i>   |              | p21 protein (Cdc42/Rac)-activated kinase 7                               | 20p12          |
| <i>PALB2</i>  | NM_024675    | partner and localizer of BRCA2                                           | 16p12.1        |
| <i>PARK2</i>  |              | parkinson protein 2, E3 ubiquitin protein ligase (parkin)                | 6q25.2-q27     |
| <i>PARP1</i>  | NM_001618    | poly (ADP-ribose) polymerase 1                                           | 1q41-q42       |
| <i>PAX5</i>   |              | paired box 5                                                             | 9p13.2         |
| <i>PBRM1</i>  | NM_018165    | polybromo 1                                                              | 3p21           |
| <i>PDGFRA</i> | NM_006206    | platelet-derived growth factor receptor, alpha polypeptide               | 4q12           |

|                 |           |                                                                           |               |
|-----------------|-----------|---------------------------------------------------------------------------|---------------|
| <i>PDGFRB</i>   | NM_002609 | platelet-derived growth factor receptor, beta polypeptide                 | 5q33.1        |
| <i>PHOX2B</i>   |           | paired-like homeobox 2b                                                   | 4p13          |
| <i>PIK3C2G</i>  | NM_004570 | phosphoinositide-3-kinase, class 2, gamma polypeptide                     | 12p12         |
| <i>PIK3CA</i>   |           | phosphoinositide-3-kinase, catalytic, alpha polypeptide                   | 3q26.3        |
| <i>PIK3CB</i>   |           | phosphoinositide-3-kinase, catalytic, beta polypeptide                    | 3q21-qter     |
| <i>PIK3CD</i>   | NM_005026 | phosphoinositide-3-kinase, catalytic, delta polypeptide                   | 1p36.2        |
| <i>PIK3CG</i>   |           | phosphoinositide-3-kinase, catalytic, gamma polypeptide                   | 7q22          |
| <i>PIK3R1</i>   | NM_181504 | phosphoinositide-3-kinase, regulatory subunit 1 (alpha)                   | 5q13.1        |
| <i>PIK3R2</i>   | NM_005027 | phosphoinositide-3-kinase, regulatory subunit 2 (beta)                    | 19q13.2-q13.4 |
| <i>PIK3R3</i>   | NM_003629 | phosphoinositide-3-kinase, regulatory subunit 3 (gamma)                   | 1p34.1        |
| <i>PKM2</i>     |           | pyruvate kinase, muscle                                                   | 15q22-qter    |
| <i>PLK2</i>     | NM_006622 | polo-like kinase 2                                                        | 5q12.1-q13.2  |
| <i>PNRC1</i>    | NM_006813 | proline-rich nuclear receptor coactivator 1                               | 6q16.1        |
| <i>PPP2R1A</i>  | NM_014225 | protein phosphatase 2, regulatory subunit A, alpha                        | 19q13         |
| <i>PRDM1</i>    |           | PR domain containing 1, with ZNF domain                                   | 6q21          |
| <i>PREX2</i>    | NM_025170 | phosphatidylinositol-3,4,5-trisphosphate-dependent Rac exchange facto     | 8q13.1        |
| <i>PRKAA2</i>   | NM_006252 | protein kinase, AMP-activated, alpha 2 catalytic subunit                  | 1p31          |
| <i>PRKAR1A</i>  |           | protein kinase, cAMP-dependent, regulatory, type I, alpha (tissue specifi | 17q23-q24     |
| <i>PRKCI</i>    | NM_002740 | protein kinase C, iota                                                    | 3q26.3        |
| <i>PTCH1</i>    | NM_000264 | patched 1                                                                 | 9q22.1-q31    |
| <i>PTEN</i>     | NM_000314 | phosphatase and tensin homolog                                            | 10q23         |
| <i>PTPN11</i>   |           | protein tyrosine phosphatase, non-receptor type 11                        | 12q24.1       |
| <i>PTPRD</i>    |           | protein tyrosine phosphatase, receptor type, D                            | 9p24.1-p23    |
| <i>PTPRS</i>    |           | protein tyrosine phosphatase, receptor type, S                            | 19p13.3       |
| <i>PTPRT</i>    |           | protein tyrosine phosphatase, receptor type, T                            | 20q12-q13     |
| <i>RAD50</i>    | NM_005732 | RAD50 homolog (S. cerevisiae)                                             | 5q23-q31      |
| <i>RAF1</i>     | NM_002880 | v-raf-1 murine leukemia viral oncogene homolog 1                          | 3p25          |
| <i>RARA</i>     |           | retinoic acid receptor, alpha                                             | 17q21.1       |
| <i>RB1</i>      |           | retinoblastoma 1                                                          | 13q14.2       |
| <i>REL</i>      | NM_002908 | v-rel reticuloendotheliosis viral oncogene homolog (avian)                | 2p13-p12      |
| <i>RET</i>      | NM_020975 | ret proto-oncogene                                                        | 10q11.2       |
| <i>RICTOR</i>   | NM_152756 | RPTOR independent companion of MTOR, complex 2                            | 5p13.1        |
| <i>RNF43</i>    | NM_017763 | ring finger protein 43                                                    | 17q23.2       |
| <i>ROR2</i>     |           | receptor tyrosine kinase-like orphan receptor 2                           | 9q22          |
| <i>ROS1</i>     |           | c-ros oncogene 1 , receptor tyrosine kinase                               | 6q21-q22      |
| <i>RPTOR</i>    | NM_020761 | regulatory associated protein of MTOR, complex 1                          | 17q25.3       |
| <i>RUNX1</i>    |           | runt-related transcription factor 1                                       | 21q22.3       |
| <i>SDHB</i>     | NM_003000 | succinate dehydrogenase complex, subunit B, iron sulfur (lp)              | 1p36.1-p35    |
| <i>SETD2</i>    | NM_014159 | SET domain containing 2                                                   | 3p21.31       |
| <i>SF3B1</i>    |           | splicing factor 3b, subunit 1, 155kDa                                     | 2q33.1        |
| <i>SHQ1</i>     | NM_018130 | SHQ1 homolog (S. cerevisiae)                                              | 3p13          |
| <i>SMAD2</i>    | NM_005901 | SMAD family member 2                                                      | 18q21         |
| <i>SMAD3</i>    | NM_005902 | SMAD family member 3                                                      | 15q21-q22     |
| <i>SMAD4</i>    | NM_005359 | SMAD family member 4                                                      | 18q21.1       |
| <i>SMARCA4</i>  | NM_003072 | SWI/SNF related, matrix associated, actin dependent regulator of chrom    | 19p13.3       |
| <i>SMARCB1</i>  | NM_003073 | SWI/SNF related, matrix associated, actin dependent regulator of chrom    | 22q11.23      |
| <i>SMO</i>      | NM_005631 | smoothened homolog (Drosophila)                                           | 7q32.1        |
| <i>SOCS1</i>    |           | suppressor of cytokine signaling 1                                        | 16p13.13      |
| <i>SOX2</i>     | NM_003106 | SRY (sex determining region Y)-box 2                                      | 3q26.3-q27    |
| <i>SPOP</i>     | NM_003563 | speckle-type POZ protein                                                  | 17q21.33      |
| <i>SRC</i>      |           | v-src sarcoma (Schmidt-Ruppin A-2) viral oncogene homolog (avian)         | 20q12-q13     |
| <i>SRSF2</i>    | NM_003016 | serine/arginine-rich splicing factor 2                                    | 17q25.2       |
| <i>STAG2</i>    | NM_006603 | stromal antigen 2                                                         | Xq25          |
| <i>STK11</i>    | NM_000455 | serine/threonine kinase 11                                                | 19p13.3       |
| <i>SUFU</i>     | NM_016169 | suppressor of fused homolog (Drosophila)                                  | 10q24.32      |
| <i>TBK1</i>     | NM_013254 | TANK-binding kinase 1                                                     | 12q14.2       |
| <i>TEK</i>      |           | TEK tyrosine kinase, endothelial                                          | 9p21          |
| <i>TERT</i>     |           | telomerase reverse transcriptase                                          | 5p15.33       |
| <i>TET1</i>     | NM_030625 | tet oncogene 1                                                            | 10q21         |
| <i>TET2</i>     | NM_017628 | tet oncogene family member 2                                              | 4q24          |
| <i>TGFBR2</i>   |           | transforming growth factor, beta receptor II (70/80kDa)                   | 3p22          |
| <i>TMPRSS2</i>  |           | transmembrane protease, serine 2                                          | 21q22.3       |
| <i>TNFAIP3</i>  |           | tumor necrosis factor, alpha-induced protein 3                            | 6q23-q25      |
| <i>TNFRSF14</i> |           | tumor necrosis factor receptor superfamily, member 14 (herpesvirus entri  | 1p36.32       |
| <i>TOP1</i>     |           | topoisomerase (DNA) I                                                     | 20q12-q13.1   |
| <i>TP53</i>     | NM_000546 | tumor protein p53                                                         | 17p13.1       |
| <i>TP63</i>     | NM_003722 | tumor protein p63                                                         | 3q27-q29      |
| <i>TSC1</i>     |           | tuberous sclerosis 1                                                      | 9q34          |
| <i>TSC2</i>     | NM_000548 | tuberous sclerosis 2                                                      | 16p13.3       |

|              |           |                                                                       |                 |
|--------------|-----------|-----------------------------------------------------------------------|-----------------|
| <i>TSHR</i>  | NM_000369 | thyroid stimulating hormone receptor                                  | 14q24-q31       |
| <i>U2AF1</i> | NM_006758 | U2 small nuclear RNA auxiliary factor 1                               | 21q22.3         |
| <i>VHL</i>   | NM_000551 | von Hippel-Lindau tumor suppressor                                    | 3p25.3          |
| <i>WAS</i>   | NM_000377 | Wiskott-Aldrich syndrome (eczema-thrombocytopenia)                    | Xp11.4-p11.21   |
| <i>WNK1</i>  | NM_018979 | WNK lysine deficient protein kinase 1                                 | 12p13.3         |
| <i>WT1</i>   | NM_000378 | Wilms tumor 1                                                         | 11p13           |
| <i>XPO1</i>  | NM_003400 | exportin 1 (CRM1 homolog, yeast)                                      | 2p15            |
| <i>YAP1</i>  | NM_006106 | Yes-associated protein 1                                              | 11q13           |
| <i>YES1</i>  | NM_005433 | v-yes-1 Yamaguchi sarcoma viral oncogene homolog 1                    | 18p11.31-p11.21 |
| <i>ZRSR2</i> | NM_005089 | zinc finger (CCCH type), RNA-binding motif and serine/arginine rich 2 | Xp22.1          |

---



**Supplementary Table 5: MRN complex mutations in human cancer.** A summary of the frequency of non-synonymous point mutations and small insertions and deletions identified in the coding region of RAD50, MRE11A, and NBN across tumor types in which at least one MRN complex mutation was identified.

| <b>Tumor type<sup>[a]</sup></b>       | <b>Mre11 Complex</b> |               |            | <b>Tumors mutated</b> | <b>Total tumors assessed</b> | <b>Frequency of Mre11 complex mutation<sup>[b]</sup></b> |
|---------------------------------------|----------------------|---------------|------------|-----------------------|------------------------------|----------------------------------------------------------|
|                                       | <b>RAD50</b>         | <b>MRE11A</b> | <b>NBN</b> |                       |                              |                                                          |
| Urothelial bladder carcinoma          | 4                    | 2             | 5          | 11                    | 100                          | 11                                                       |
| Breast cancer                         | 3                    | 1             | 4          | 8                     | 636                          | 1.26                                                     |
| Cancer Cell Line Encyclopedia         | 74                   | 37            | 26         | 137                   | 905                          | 15.14                                                    |
| Colorectal carcinoma                  | 30                   | 8             | 10         | 48                    | 585                          | 8.21 (64.6)                                              |
| Glioblastoma                          | 2                    | 2             | 0          | 4                     | 276                          | 1.45 (25)                                                |
| Head & neck squamous cell carcinoma   | 6                    | 2             | 6          | 14                    | 380                          | 3.68                                                     |
| Kidney renal clear cell carcinoma     | 4                    | 0             | 3          | 7                     | 499                          | 1.4                                                      |
| Kidney renal papillary cell carcinoma | 0                    | 1             | 1          | 2                     | 103                          | 1.94                                                     |
| Acute myeloid leukemia                | 1                    | 1             | 0          | 2                     | 252                          | 0.79                                                     |
| Low-grade glioma                      | 2                    | 1             | 1          | 4                     | 170                          | 2.35 (25)                                                |
| Lung adenocarcinoma                   | 9                    | 4             | 9          | 22                    | 413                          | 5.32                                                     |
| Lung squamous cell carcinoma          | 4                    | 3             | 1          | 8                     | 183                          | 4.37                                                     |
| Neuroblastoma                         | 0                    | 0             | 1          | 1                     | 73                           | 1.37                                                     |
| Serous ovarian carcinoma              | 2                    | 1             | 1          | 4                     | 464                          | 0.86                                                     |
| Pancreatic adenocarcinoma             | 0                    | 1             | 0          | 1                     | 34                           | 2.94                                                     |
| Prostate cancer (metastases)          | 1                    | 0             | 0          | 1                     | 61                           | 1.64                                                     |
| Small-cell lung cancer                | 0                    | 0             | 1          | 1                     | 29                           | 3.45                                                     |
| Melanoma                              | 8                    | 6             | 3          | 17                    | 376                          | 4.52                                                     |
| Stomach adenocarcinoma                | 7                    | 2             | 5          | 14                    | 151                          | 9.27                                                     |
| Uterine corpus endometrioid carcinoma | 11                   | 8             | 9          | 28                    | 248                          | 11.29 (71.4)                                             |

[a] Excludes 19 cohorts across 14 tumor types (1559 cases) that lacked mutations in the MRN complex

[b] In parentheses, the percentage of mutated cases that were hyper-mutated exome/genome-wide

**Supplementary Table 6: Yeast strains utilized.** Here, the distinct Rad50 and Mec1 mutant and wildtype strains utilized in this study are shown.

| Strain  | Name                            | Genotype <sup>[a]</sup>                                                              |
|---------|---------------------------------|--------------------------------------------------------------------------------------|
| JPY708  | WT                              | <i>MATa</i>                                                                          |
| JPY1836 | <i>rad50Δ</i>                   | <i>rad50Δ::KAN FLAG-RAD53 MATa</i>                                                   |
| JPY5746 | <i>rad50-L1240F</i>             | <i>rad50-L1240F::HYG FLAG-RAD53 MATa</i>                                             |
| JPY5748 | <i>rad50-L1240A</i>             | <i>rad50-L1240A::HYG FLAG-RAD53 MATalpha</i>                                         |
| JPY5750 | <i>rad50-L1240R</i>             | <i>rad50-L1240R::HYG FLAG-RAD53 MATa</i>                                             |
| JPY6125 | <i>rad50-D1241N</i>             | <i>rad50-D1241N::HYG FLAG-RAD53 MATa</i>                                             |
| JPY6124 | <i>rad50-D1241A</i>             | <i>rad50-D1241A::HYG FLAG-RAD53 MATalpha</i>                                         |
| JPY6168 | <i>rad50-Q1262K</i>             | <i>rad50-Q1262K::HYG FLAG-RAD53 MATa</i>                                             |
| JPY5767 | <i>mec1Δ</i>                    | <i>mec1Δ::TRP1 sml1ΔHIS3 MATa</i>                                                    |
| JPY5768 | <i>mec1Δ sae2Δ</i>              | <i>mec1Δ::TRP1 sml1ΔHIS3 sae2ΔKAN MATalpha</i>                                       |
| JPY5769 | <i>rad50-L1240F mec1Δ</i>       | <i>rad50-L1240F::HYG mec1Δ::TRP1 sml1ΔHIS3 MATalpha</i>                              |
| JPY5770 | <i>rad50-L1240F mec1Δ sae2Δ</i> | <i>rad50-L1240F::HYG mec1Δ::TRP1 sml1ΔHIS3 sae2Δ sae2ΔKAN MATalpha</i>               |
| JPY5769 | <i>rad50-L1240A mec1Δ</i>       | <i>rad50-L1240A::HYG mec1Δ::TRP1 sml1ΔHIS3 MATa</i>                                  |
| JPY5770 | <i>rad50-L1240A mec1Δ sae2Δ</i> | <i>rad50-L1240A::HYG mec1Δ::TRP1 sml1ΔHIS3 sae2Δ sae2ΔKAN MATa</i>                   |
| JPY6140 | <i>rad50-D1241N mec1Δ</i>       | <i>rad50-D1241N::HYG mec1Δ::TRP1 sml1ΔHIS3 MATalpha</i>                              |
| JPY6143 | <i>rad50-D1241N mec1Δ sae2Δ</i> | <i>rad50-D1241N::HYG mec1Δ::TRP1 sml1ΔHIS3 sae2Δ sae2ΔKAN MATalpha</i>               |
| JPY6146 | <i>rad50-D1241A mec1Δ</i>       | <i>rad50-D1241A::HYG mec1Δ::TRP1 sml1ΔHIS3 MATalpha</i>                              |
| JPY6149 | <i>rad50-D1241A mec1Δ sae2Δ</i> | <i>rad50-D1241A::HYG mec1Δ::TRP1 sml1ΔHIS3 sae2Δ sae2ΔKAN MATa</i>                   |
| JPY6136 | <i>rad50-Q1262K mec1Δ</i>       | <i>rad50-Q1262K::HYG mec1Δ::TRP1 sml1ΔHIS3 MATalpha</i>                              |
| JPY6138 | <i>rad50-Q1262K mec1Δ sae2Δ</i> | <i>rad50-Q1262K::HYG mec1Δ::TRP1 sml1ΔHIS3 sae2Δ sae2ΔKAN MATalpha</i>               |
| JPY2110 | WT                              | <i>FLAG-RAD53::LEU2 MATalpha</i>                                                     |
| JPY1932 | <i>rad50Δ mec1Δ sae2Δ</i>       | <i>rad50ΔURA3 mec1ΔHYG sml1Δ::HIS3 sae2ΔTRP1 FLAG-RAD53::LEU2 MATalpha</i>           |
| JPY1830 | <i>mec1Δ</i>                    | <i>mec1Δ::HYG sml1Δ::HIS3 FLAG-RAD53::LEU2 MATa</i>                                  |
| JPY1928 | <i>mec1Δ sae2Δ</i>              | <i>mec1Δ::HYG sml1Δ::HIS3 sae2ΔTRP1 FLAG-RAD53::LEU2 MATa</i>                        |
| JPY6013 | <i>rad50-L1240F mec1Δ</i>       | <i>rad50-L1240F::HYG mec1Δ::TRP1 sml1Δ::HIS3 FLAG-RAD53::LEU2 MATalpha</i>           |
| JPY6014 | <i>rad50-L1240F mec1Δ sae2Δ</i> | <i>rad50-L1240F::HYG mec1Δ::TRP1 sml1Δ::HIS3 sae2ΔTRP1 FLAG-RAD53::LEU2 MATalpha</i> |
| JPY6015 | <i>rad50-L1240A mec1Δ</i>       | <i>rad50-L1240A::HYG mec1Δ::TRP1 sml1Δ::HIS3 FLAG-RAD53::LEU2 MATalpha</i>           |
| JPY6016 | <i>rad50-L1240A mec1Δ sae2Δ</i> | <i>rad50-L1240A::HYG mec1Δ::TRP1 sml1Δ::HIS3 sae2ΔTRP1 FLAG-RAD53::LEU2 MATa</i>     |
| JPY6182 | <i>rad50-D1241N mec1Δ</i>       | <i>rad50-D1241N::HYG mec1Δ::TRP1 sml1Δ::HIS3 FLAG-RAD53::LEU2 MATa</i>               |
| JPY6183 | <i>rad50-D1241N mec1Δ sae2Δ</i> | <i>rad50-D1241N::HYG mec1Δ::TRP1 sml1Δ::HIS3 sae2ΔTRP1 FLAG-RAD53::LEU2 MATalpha</i> |
| JPY6184 | <i>rad50-D1241A mec1Δ</i>       | <i>rad50-D1241N::HYG mec1Δ::TRP1 sml1Δ::HIS3 FLAG-RAD53::LEU2 MATa</i>               |
| JPY6185 | <i>rad50-D124A mec1Δ sae2Δ</i>  | <i>rad50-D1241N::HYG mec1Δ::TRP1 sml1Δ::HIS3 sae2ΔTRP1 FLAG-RAD53::LEU2 MATa</i>     |
| JPY6186 | <i>rad50-Q1262K mec1Δ</i>       | <i>rad50-Q1262K::HYG mec1Δ::TRP1 sml1Δ::HIS3 FLAG-RAD53::LEU2 MATalpha</i>           |
| JPY6187 | <i>rad50-Q1262K mec1Δ sae2Δ</i> | <i>rad50-Q1262K::HYG mec1Δ::TRP1 sml1Δ::HIS3 sae2ΔTRP1 FLAG-RAD53::LEU2 MATa</i>     |
| JPY1746 | <i>rad50Δ/WT</i>                | <i>rad50Δ::URA3/RAD50 FLAG-RAD53::LEU2/FLAG-RAD53 MATa/MATalpha</i>                  |
| JPY6084 | <i>rad50-D1241N/WT</i>          | <i>rad50-D1241N::HYG/WT MATa/MATalpha</i>                                            |
| JPY6086 | <i>rad50-D1241A/WT</i>          | <i>rad50-D1241A::HYG/WT MATa/MATalpha</i>                                            |
| JPY6139 | <i>rad50-Q1262K/WT</i>          | <i>rad50-Q1262K::HYG/WT MATa/MATalpha</i>                                            |
| JPY5739 | <i>rad50-L1240F/WT</i>          | <i>rad50-L1240F::HYG/WT MATa/MATalpha</i>                                            |
| JPY5742 | <i>rad50-L1240A/WT</i>          | <i>rad50-L1240A::HYG /WT MATa/MATalpha</i>                                           |
| JPY5743 | <i>rad50-L1240R/WT</i>          | <i>rad50-L1240R::HYG/WT MATa/MATalpha</i>                                            |
| JPY5758 | <i>rad50-L1240F/L1240F</i>      | <i>rad50-L1240F::HYG/rad50-L1240F::HYG MATa/MATalpha</i>                             |
| JPY5759 | <i>rad50-L1240A/L1240A</i>      | <i>rad50-L1240A::HYG/rad50-L1240A::HYG MATa/MATalpha</i>                             |
| JPY5760 | <i>rad50-L1240R/L1240R</i>      | <i>rad50-L1240R::HYG/rad50-L1240R::HYG MATa/MATalpha</i>                             |

[a] All strains in the W303 background (*trp1-1 leu2-3, 112 ura3-1 can1-100 ade2-1 his3-11, 15 RAD5*)
